# Supplementary material for: Synthesis of carbazoles via aryl C–H activation triggered by surfactant-associated palladium nanoparticles under microwave-assisted heating
Source: Royal Society of Chemistry journal article supplement (doi:10.1039/d5ob01749a), 2026-01-01
Supplement: d5ob01749a1.pdf [file d5ob01749a1.pdf]

## Electronic Supplementary Information (ESI)

### Synthesis of carbazoles via aryl C–H activation triggered by surfactant-associated palladium nanoparticles under microwave-assisted heating

Safiul Alam,<sup>\*a</sup> Aminur Khan,<sup>a,#</sup> Asifur Rahaman Mallick,<sup>a,#</sup> Md Samiul Islam,<sup>a</sup> Abhimanyu Sarkar,<sup>b</sup> Bibhutibhushan Show,<sup>\*b</sup> Jakir Ahmed,<sup>c</sup> Amit Kumar,<sup>d</sup> Antoine Maruani<sup>c</sup> and Hamid Dhimane<sup>\*d</sup>

[a] Department of Chemistry, Aliah University, IIA/27, Newtown, Kolkata 700160, India.

[b] Department of Chemistry, Jadavpur University, Kolkata 700032, India.

[c] Department of Chemical Sciences, IISER Kolkata, 741246, India

[d] Laboratoire de Chimie et Biochimie Pharmacologiques et Toxicologiques - UMR 8601 Université Paris Cité, CNRS, 45, rue des Saints-Pères, 75270, Paris Cedex 06, France.

<sup>#</sup>Both authors contributed equally to this work.

<sup>\*</sup>Corresponding authors

*E-mail addresses:* safiul\_ku@yahoo.co.in (Dr. S. Alam), hamid.dhimane@u-paris.fr (Prof. H. Dhimane), bibhutishow1978@gmail.com (Dr. B. Show)

| Table of Contents |                                                                                                                                                                                                                                                                                                                                                                                                                                                                                                                                                                                                               |          |
|-------------------|---------------------------------------------------------------------------------------------------------------------------------------------------------------------------------------------------------------------------------------------------------------------------------------------------------------------------------------------------------------------------------------------------------------------------------------------------------------------------------------------------------------------------------------------------------------------------------------------------------------|----------|
| 1.                | Materials and Instruments                                                                                                                                                                                                                                                                                                                                                                                                                                                                                                                                                                                     | S3       |
| 2.                | Synthesis and characterization data of 2-halo- <i>N</i> -arylanilines <b>3</b> .<br>2.1 General procedure for the preparation of 2-iodo- <i>N</i> -pheylaniline <b>3aa</b> .<br>2.2 Synthesis and characterization data of 2-halo- <i>N</i> -arylanilines <b>3aa</b> , <b>3a'a</b> , <b>3a''a</b> , <b>3ab-3an</b> , <b>3ba-3ka</b> , <b>3bn</b> , <b>3bo</b> , <b>3kh</b> , <b>3ba-1</b> , <b>3ia-1</b> and <b>3aa-1</b> .                                                                                                                                                                                   | S3-S22   |
| 3.                | Optimization of Pd-catalyzed intramolecular aryl C–H activation of 2-iodo- <i>N</i> -phenylaniline <b>3aa</b> in water to give carbazole <b>4-1</b> .                                                                                                                                                                                                                                                                                                                                                                                                                                                         | S22-S30  |
| 4.                | Kinetic study: Control experiments on Pd-catalyzed intramolecular aryl C–H activation of 2-iodo- <i>N</i> -phenylaniline <b>3aa</b> in water to give carbazole <b>4-1</b> .                                                                                                                                                                                                                                                                                                                                                                                                                                   | S31-S36  |
| 5.                | 5.1 Preparation of palladium nanoparticles (PdNPs) catalysts 1 and 2.<br>5.2 Screening of PdNPs catalysts 1 and 2 for the optimization reactions of <b>3aa</b> to give <b>4-1</b> .                                                                                                                                                                                                                                                                                                                                                                                                                           | S36-S38  |
| 6.                | 6.1 Typical procedure for the preparation of carbazole <b>4-1</b> <i>via</i> PdNPs-catalyzed aryl C–H activation of 2-iodo- <i>N</i> -phenylaniline <b>3aa</b> under microwave-assisted heating in water.<br>6.2 TON (Turnover number) and TOF (Turnover frequency) calculations.<br>6.3 Recycling studies and E-factor calculation.<br>6.4 Characterization data of carbazoles <b>4-1</b> to <b>4-43</b> , and diphenylamine <b>5</b> .                                                                                                                                                                      | S39-S59  |
| 7.                | Analytical techniques for the characterization of PdNPs catalysts 1 and 2.<br>7.1 FTIR (Fourier Transform Infrared Spectroscopy) studies.<br>7.2 UV-Vis (Ultraviolet-visible) studies.<br>7.3 PXRD (Powdered X-ray diffraction) studies.<br>7.4 FE-SEM (Field Emission Scanning Electron Microscopy) studies.<br>7.5 HR-TEM (High-Resolution Transmission Electron Microscopy) studies.<br>7.6 Energy dispersive X-ray (EDX) analysis.<br>7.7 X-ray Photoelectron Spectroscopy (XPS) analysis.<br>7.8 Single crystal X-ray diffraction (SCXRD) analysis.<br>7.9 Analytical data of the recovered Pd catalyst. | S59-S69  |
| 8.                | References                                                                                                                                                                                                                                                                                                                                                                                                                                                                                                                                                                                                    | S70      |
| 9.                | 9.1 <sup>1</sup> H NMR and <sup>13</sup> C NMR spectra of 2-halo- <i>N</i> -arylanilines <b>3</b> .<br>9.2 <sup>1</sup> H NMR and <sup>13</sup> C NMR spectra of carbazoles <b>4-1</b> to <b>4-43</b> .<br>9.3 HRMS spectra of carbazoles <b>4-3</b> , <b>4-4</b> , <b>4-18</b> , <b>4-19</b> , <b>4-23</b> , and <b>4-35</b> .                                                                                                                                                                                                                                                                               | S71-S228 |

## 1. Materials and Instruments

All reactions were performed using oven-dried glassware and anhydrous solvents, unless mentioned otherwise. All reagents and spectroscopic grade solvents were purchased from commercial sources. Palladium catalysts and surfactants were purchased from Sigma-Aldrich. Organic base, inorganic bases, and other reagents were purchased from Spectrochem Pvt. Ltd.. All anhydrous solvents were prepared by standard drying methods and distilled before use. CEM Discover and Anton Paar microwave reactor were utilized for reactions under microwave irradiation. Progress of all reactions was monitored by thin layer chromatography (TLC) on commercial aluminum coated TLC plates from Merck (60 F254) using an ultraviolet light (256 nm) chamber and iodine chamber for visualization. Silica gel 100-200 mesh (Merck) was used for column chromatography. Melting points were measured in open capillaries and are uncorrected. IR spectra were recorded with a Shimadzu FTIR spectrometer IR Affinity-1S using the ATR (Attenuated Total Reflectance) method. Ultraviolet (UV-Vis) absorption spectra were recorded with a Shimadzu UV/Vis spectrophotometer at  $25 \pm 0.1$  °C in a quartz cuvette of 1.00 cm path length. The Powdered X-ray diffraction (PXRD) study was done by Bruker D8 Advance X-ray diffractometer using Cu-K $\alpha$  ( $\lambda = 1.5418$  Å) radiation. The Field emission scanning electron microscopy (FE-SEM) images were taken from QUANTA FEG 250 instrument. The High resolution transmission electron microscopy (HR-TEM) images were collected from JEOL, JEM-2100F instrument, operating at an accelerating voltage of 200 kV. The EDS mapping related to this was recorded using the same instrument. NMR spectra were recorded on Bruker 250, 400 and 500 spectrometers (250 MHz, 400 MHz, 500 MHz for  $^1\text{H}$  NMR, and 62.5 MHz, 100 MHz, 125 MHz for  $^{13}\text{C}$  NMR respectively). Chemical shifts ( $\delta$ ) are reported in parts per million (ppm) with Me $_4$ Si or solvent (CDCl $_3$ , CD $_3$ OD, CD $_3$ CN, DMSO- $d_6$ , acetone- $d_6$  and D $_2$ O) signal as internal standard, and coupling constants ( $J$ ) are given in Hz. Standard abbreviations are used to denote the multiplicities of the signals, such as - s (singlet); d (doublet); t (triplet); q (quartet); dd (doublet of doublets); dt (doublet of triplets); td (triplet of doublets), tt (triplet of triplets), ddd (doublet of doublet of doublets); m (multiplet); and brs (broad singlet signal). High resolution mass spectra were recorded with FTMS-ESI and mass analyzer with an Agilent system from ThermoFisher. Mass spectra were recorded on a Q-TOF micromass instrument. LCMS analysis was performed using Column: YMC TRIART C18 (50 $\times$ 4.6 mm, 5 $\mu$ , 100 Å), mobile phase: from 95% (0.05% formic acid in water) and 5% acetonitrile to 10% (0.05% formic acid in water) and 90% acetonitrile in 5 min, Flow: 1.5 ml/min on Agilent 1200 series instrument.

## 2. Synthesis and characterization data of 2-halo-*N*-arylanilines 3.

**2.1 General procedure for the preparation of 2-iodo-*N*-pheylaniline 3aa:** To a mixture of *o*-iodoaniline **1a** (219 mg, 1 mmol), phenylboronic acid **2a** (183 mg, 1.5 mmol) and Cu(OAc) $_2$ .H $_2$ O (20 mg, 0.1 mmol), *n*-decanoic acid (34 mg, 0.2 mmol) was added in a 25 ml round bottom flask fitted with CaCl $_2$  guard tube. Then DBU (183 mg, 1.2 mmol) and dry toluene (3 ml) were added successively to the reaction mixture and stirred at room temperature for 24 h. The reaction mixture was diluted with water (15 ml) and extracted with ethyl acetate (15 ml  $\times$  2). Then combined organic layer was washed with water (15 ml) followed by brine solution (15 ml), and dried over anhydrous Na $_2$ SO $_4$ . After removal of the volatiles under reduced pressure, the residue was purified by column

chromatography on silica gel using hexane/ethyl acetate mixtures (99:1) as the eluent to yield 2-iodo-*N*-phenylaniline (**3aa**, 221 mg, 75%) as an orange gel (Scheme S1). Similarly, compounds **3a'a**, **3a''a**, **3ab-3an**, **3ba-3ka**, **3bn**, **3bo** and **3kh** were prepared from the suitable *o*-haloanilines (**1a'**, **1a''** and **1b-1k**) and arylboronic acids (**2a-2q**).

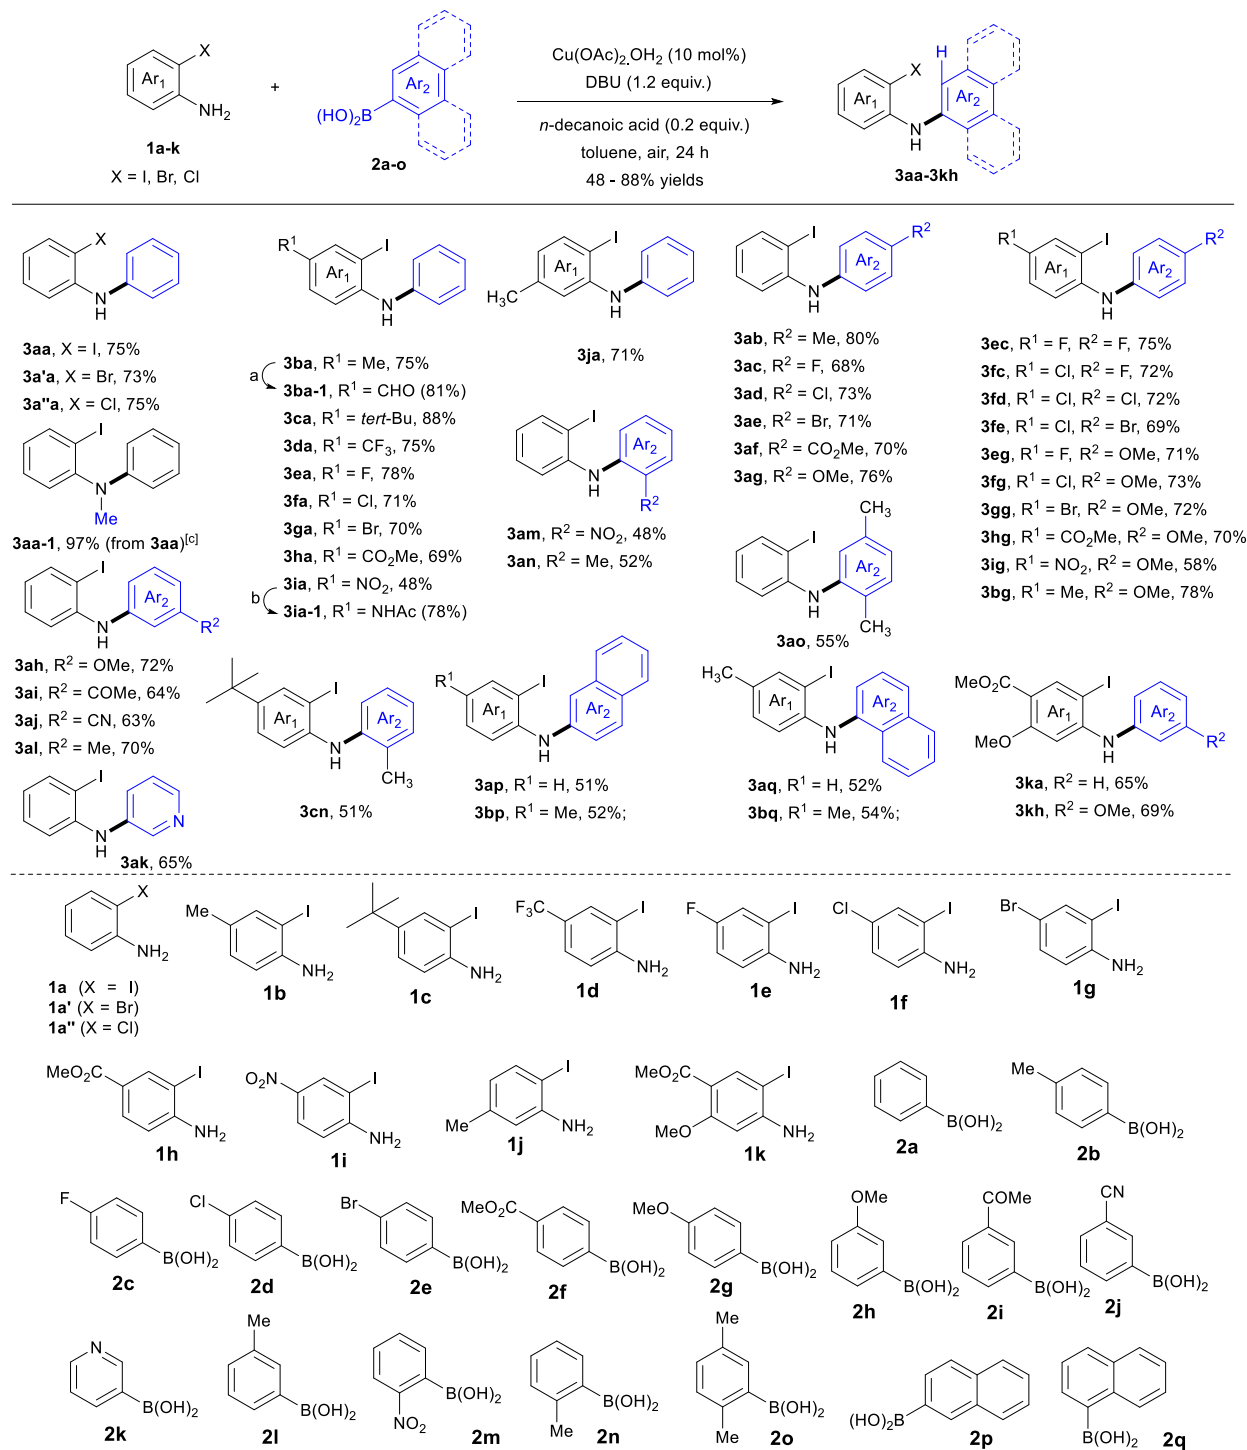



**Scheme S1.** Copper-catalyzed synthesis of 2-halo-*N*-arylanilines **3**. **Reaction conditions:** **1** (1.0 mmol), **2** (1.5 mmol), Cu(OAc)<sub>2</sub>·H<sub>2</sub>O (0.1 mmol), DBU (1.2 mmol), *n*-decanoic acid (0.2 mmol), dry toluene (3 ml), air, rt, 24 h. <sup>[a]</sup> DDQ (3 equiv), MeOH/THF/H<sub>2</sub>O (16:6:1), rt, 1 h. <sup>[b]</sup> Fe dust (5 equiv.), acetic acid, reflux, 3 h. [c] **3aa** (1 mmol), MeI (2 equiv.), NaH (2 equiv.), DMF, 0 °C - rt, 8 h.

## 2.2 Synthesis and characterization data of 2-halo-*N*-arylanilines **3aa**, **3a'a**, **3a''a**, **3ab-3an**, **3ba-3ka**, **3bn**, **3bo**, **3kh**, **3ba-1**, **3ia-1** and **3aa-1**.

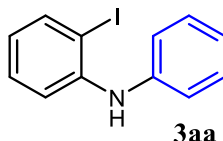

**2-Iodo-*N*-phenylaniline (**3aa**)**<sup>[1]</sup>: Compound **3aa** was prepared according to the general procedure from *o*-iodoaniline **1a** (219 mg, 1 mmol) and phenylboronic acid **2a** (183 mg, 1.5 mmol); and purified by column chromatography on silica gel, eluting with hexane/ethyl acetate (99:1). Orange gel (221 mg, 75% yield). <sup>1</sup>H NMR (400 MHz, DMSO-*d*<sub>6</sub>):  $\delta$  = 7.84 (d, *J* = 8.0 Hz, 1H, Ar-H), 7.32-7.27 (m, 2H Ar-H), 7.22 (brs, 1H, N-H), 7.19 (d, *J* = 8.0 Hz, 2H, Ar-H), 6.94 (d, *J* = 8.0 Hz, 2H, Ar-H), 6.82 (t, *J* = 7.3 Hz, 1H, Ar-H), 6.75 (t, *J* = 7.4 Hz, 1H, Ar-H) ppm; <sup>13</sup>C NMR (125 MHz, CDCl<sub>3</sub>):  $\delta$  = 143.96 (C), 142.03 (C), 139.54 (CH), 129.47 (2CH), 129.04 (CH), 122.57 (CH), 121.93 (CH), 120.02 (2 CH), 115.88 (CH), 88.77 (C) ppm; IR (ATR):  $\tilde{\nu}$  = 3381 (N-H), 3010, 1575, 1495, 1444, 1307, 1007, 745, 693 cm<sup>-1</sup>; LCMS: *m/z* calcd. for [C<sub>12</sub>H<sub>10</sub>IN+H]<sup>+</sup>: 295.99; found: 295.90.

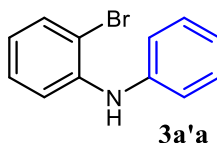

**2-Bromo-*N*-phenylaniline (**3a'a**)**<sup>[1]</sup>: Compound **3a'a** was prepared according to the general procedure from *o*-bromoaniline **1a'** (172 mg, 1 mmol) and phenylboronic acid **2a** (183 mg, 1.5 mmol); and purified by column chromatography on silica gel, eluting with hexane/ethyl acetate (99:1). Colorless gel (181 mg, 73%). <sup>1</sup>H NMR (500 MHz, CDCl<sub>3</sub>):  $\delta$  = 7.51 (dd, *J* = 8.0, 1.5 Hz, 1H, Ar-H), 7.33-7.29 (m, 2H, Ar-H), 7.25-7.23 (m, 1H, Ar-H), 7.17-7.13 (m, 3H, Ar-H), 7.03 (tt, *J* = 8.5, 1.0 Hz, 1H, Ar-H), 6.73 (td, *J* = 7.0, 1.5 Hz, 1H, Ar-H), 6.07 (brs, 1H, N-H) ppm; <sup>13</sup>C NMR (125 MHz, CDCl<sub>3</sub>):  $\delta$  = 141.63 (C), 141.46 (C), 132.98 (CH), 129.46 (2CH), 128.09 (CH), 122.71 (CH), 120.90 (CH), 120.30 (2CH), 115.82 (CH), 112.20 (C) ppm; IR (ATR):  $\tilde{\nu}$  = 3405 (N-H), 3015, 1586, 1507, 1449, 1311, 1021, 748, 693 cm<sup>-1</sup>; LCMS: *m/z* calcd. for [C<sub>12</sub>H<sub>10</sub>BrN+H]<sup>+</sup>: 248.00; found: 248.00.

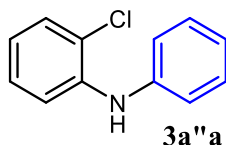

**2-Chloro-N-phenylaniline (3a'a)**<sup>[1]</sup>: Compound **3a'a** was prepared according to the general procedure from *o*-chloroaniline **1a''** (127 mg, 1 mmol) and phenylboronic acid **2a** (183 mg, 1.5 mmol); and purified by column chromatography on silica gel, eluting with hexane/ethyl acetate (99:1). Colorless gel (153 mg, 75%); <sup>1</sup>H NMR (500 MHz, CDCl<sub>3</sub>):  $\delta$  = 7.35 (dd,  $J$  = 8.0, 1.5 Hz, 1H, Ar-H), 7.31 (tt,  $J$  = 7.5, 2.0 Hz, 2H, Ar-H), 7.26 (dd,  $J$  = 8.0, 1.5 Hz, 1H, Ar-H), 7.16-7.14 (m, 2H, Ar-H), 7.11 (td,  $J$  = 8.5, 1.5 Hz, 1H, Ar-H), 7.03 (tt,  $J$  = 7.5, 1.0 Hz, 1H, Ar-H), 6.79 (td,  $J$  = 7.5, 1.5 Hz, 1H, Ar-H), 6.09 (brs, 1H, N-H) ppm; <sup>13</sup>C NMR (125 MHz, CDCl<sub>3</sub>):  $\delta$  = 141.49 (C), 140.28 (C), 129.72 (CH), 129.42 (2CH), 127.39 (CH), 122.63 (CH), 121.48 (C), 120.34 (CH), 120.17 (2 CH), 115.54 (CH) ppm; IR (ATR):  $\tilde{\nu}$  = 3400 (N-H), 3017, 1575, 1509, 1465, 1301, 1041, 760 cm<sup>-1</sup>; LCMS:  $m/z$  calcd for [C<sub>12</sub>H<sub>10</sub>ClN+H]<sup>+</sup>: 204.05; found: 204.00.

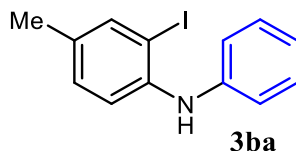

**2-Iodo-4-methyl-N-phenylaniline (3ba)**<sup>[1]</sup>: Compound **3ba** was prepared according to the general procedure from 4-methyl-2-iodoaniline **1b** (233 mg, 1 mmol) and phenylboronic acid **2a** (183 mg, 1.5 mmol); and purified by column chromatography on silica gel, eluting with hexane/ethyl acetate (99:1). Orange gel (232 mg, 75%). <sup>1</sup>H NMR (500 MHz, CDCl<sub>3</sub>):  $\delta$  = 7.60 (d,  $J$  = 1.5 Hz, 1H, Ar-H), 7.27-7.25 (m, 2H, Ar-H), 7.11 (d,  $J$  = 8.0 Hz, 1H, Ar-H), 7.05-6.99 (m, 3H, Ar-H), 6.95 (tt,  $J$  = 8.5, 1.0 Hz, 1H, Ar-H), 5.73 (brs, 1H, N-H), 2.24 (s, 3H, CH<sub>3</sub>) ppm; <sup>13</sup>C NMR (125 MHz, CDCl<sub>3</sub>):  $\delta$  = 143.04 (C), 141.51 (C), 139.92 (C), 132.45 (CH), 129.96 (CH), 129.61 (2CH), 121.95 (CH), 119.01 (2CH), 117.25 (CH), 90.11 (C), 20.27 (CH<sub>3</sub>) ppm; IR (ATR):  $\tilde{\nu}$  = 3382 (N-H), 2950, 1602, 1507, 1246, 1033, 828 cm<sup>-1</sup>; LCMS:  $m/z$  calcd. for [C<sub>13</sub>H<sub>12</sub>IN+H]<sup>+</sup>: 310.00; found: 310.00.

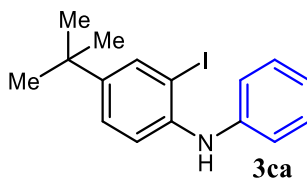

**4-(tert-Butyl)-2-iodo-N-phenylaniline (3ca)**<sup>[1]</sup>: Compound **3ca** was prepared according to the general procedure from 4-(tert-butyl)-2-iodoaniline **1c** (275 mg, 1 mmol) and phenylboronic acid **2a** (183 mg, 1.5 mmol); and purified by column chromatography on silica gel, eluting with hexane/ethyl acetate (99:1). Brown gel (309 mg, 88%); <sup>1</sup>H NMR (500 MHz, CDCl<sub>3</sub>):  $\delta$  = 7.76 (d,  $J$  = 2.0 Hz, 1H, Ar-H), 7.33 (td,  $J$  = 7.5, 1.0 Hz, 1H, Ar-H), 7.30-7.24 (m, 1H, Ar-H), 7.23 (dd,  $J$  = 8.5, 2.0 Hz, 1H, Ar-H), 7.16 (d,  $J$  = 8.5 Hz, 1H, Ar-H), 7.11-7.07 (m, 2H, Ar-H), 7.02-6.96 (m, 1H,

Ar-H), 5.79 (brs, 1H, N-H), 1.28 (s, 9H, C(CH<sub>3</sub>)<sub>3</sub> ppm; <sup>13</sup>C NMR (125 MHz, CDCl<sub>3</sub>): δ = 157.20 (C), 145.57 (C), 142.56 (C), 141.19 (C), 136.30 (CH), 129.39 (2CH), 126.15 (CH), 121.83 (CH), 119.00 (2CH), 116.32 (CH), 89.72 (C), 31.34 (3CH<sub>3</sub>) ppm; IR (ATR):  $\tilde{\nu}$  = 3388 (N-H), 3049, 2961, 1595, 1496, 1468, 1388, 1366, 1304, 1265, 1201, 1177, 1119, 1074, 1026, 883, 816, 747, 688, 664, 624, 592 cm<sup>-1</sup>; LCMS: *m/z* calcd. for [C<sub>16</sub>H<sub>18</sub>IN+H]<sup>+</sup>: 352.05.00; found: 352.20.

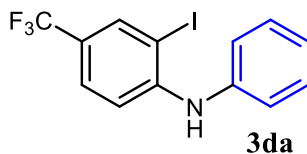

**2-Iodo-N-phenyl-4-(trifluoromethyl)aniline (3da):** Compound **3da** was prepared according to the general procedure from 2-iodo-4-(trifluoromethyl)aniline **1d** (287 mg, 1 mmol) and phenylboronic acid **2a** (183 mg, 1.5 mmol), and purified by column chromatography on silica gel, eluting with hexane/ethyl acetate (97:3). Red gel (272 mg, 75%); <sup>1</sup>H NMR (500 MHz, CDCl<sub>3</sub>): δ = 7.97 (d, *J* = 2.0 Hz, 1H, Ar-H), 7.33-7.35 (m, 1H, Ar-H), 7.33 (td, *J* = 7.5, 2.0 Hz, 1H, Ar-H), 7.19 (dd, *J* = 7.5, 2.5 Hz, 2H, Ar-H), 7.15 (t, *J* = 7.5 Hz, 1H, Ar-H), 7.11-7.08 (m, 1H, Ar-H), 7.01 (dd, *J* = 6.5, 1.0 Hz, 1H, Ar-H), 6.20 (brs, 1H, N-H) ppm; <sup>13</sup>C NMR (125 MHz, CDCl<sub>3</sub>): δ = 157.21 (C), 147.24 (C), 140.24 (C), 136.50 (C), 129.71 (2CH), 124.45 (CH), 122.22 (3CH), 118.87 (CH), 112.90 (CH), 85.62 (C) ppm; IR (ATR):  $\tilde{\nu}$  = 3386 (N-H), 3018, 2914, 2852, 1732, 1597, 1503, 1493, 1471, 1389, 1306, 1274, 1224, 1169, 1151, 1078, 1025, 995, 881, 872, 808, 736, 694, 663, 539, 528 cm<sup>-1</sup>; LCMS: *m/z* calcd. for [C<sub>13</sub>H<sub>9</sub>F<sub>3</sub>IN+H]<sup>+</sup>: 363.98; found: 364.00.

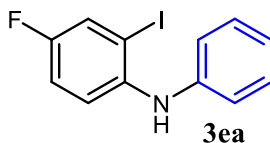

**4-Fluoro-2-iodo-N-phenylaniline (3ea)**<sup>[1]</sup>: Compound **3ea** was prepared according to the general procedure from 4-fluoro-2-iodoaniline **1e** (237 mg, 1 mmol) and phenylboronic acid **2a** (183 mg, 1.5 mmol), and purified by column chromatography on silica gel, eluting with hexane/ethyl acetate (98:2). Light yellow gel (244 mg, 78%). <sup>1</sup>H NMR (500 MHz, CDCl<sub>3</sub>): δ = 7.50 (dd, *J* = 8.0, 3.0 Hz, 1H, Ar-H), 7.28 (t, *J* = 7.5 Hz, 2H, Ar-H), 7.15 (dd, *J* = 9.0, 5.0 Hz, 1H, Ar-H), 7.02-6.94 (m, 4H, Ar-H), 5.67 (brs, 1H, N-H) ppm; <sup>13</sup>C NMR (125 MHz, CDCl<sub>3</sub>): δ = 156.78 (d, *J*<sub>CF</sub> = 244.4 Hz, C), 142.76 (C), 140.47 (C), 129.52 (2CH), 125.84 (d, *J*<sub>CF</sub> = 24.5 Hz, CH), 122.05 (CH), 118.79 (2CH), 117.98 (d, *J*<sub>CF</sub> = 7.7 Hz, CH), 115.98 (d, *J*<sub>CF</sub> = 21.8 Hz, CH), 89.06 (d, *J*<sub>CF</sub> = 8.1 Hz, C) ppm; IR (ATR):  $\tilde{\nu}$  = 3384 (N-H), 2920, 1508, 1458, 1238, 1180, 1034, 833 cm<sup>-1</sup>; LCMS: *m/z* calcd. for [C<sub>12</sub>H<sub>9</sub>FIN+H]<sup>+</sup>: 313.98; found: 314.00.

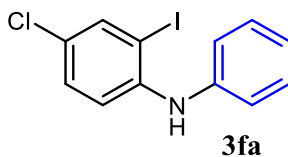

**4-Chloro-2-iodo-*N*-phenylaniline (3fa)**<sup>[1]</sup>: Compound **3fa** was prepared according to the general procedure from 4-chloro-2-iodoaniline **1f** (253 mg, 1 mmol) and phenylboronic acid **2a** (183 mg, 1.5 mmol), and purified by column chromatography on silica gel, eluting with hexane/ethyl acetate (99:1). Light yellow gel (234 mg, 71%). <sup>1</sup>H NMR (500 MHz, CDCl<sub>3</sub>):  $\delta$  = 7.72 (d,  $J$  = 2.5 Hz, 1H, Ar-H), 7.31 (t,  $J$  = 8.0 Hz, 2H, Ar-H), 7.15 (dd,  $J$  = 9.0, 2.5 Hz, 1H, Ar-H), 7.10-7.03 (m, 4H, Ar-H), 5.85 (brs, 1H, N-H) ppm; <sup>13</sup>C NMR (125 MHz, CDCl<sub>3</sub>):  $\delta$  = 142.95 (C), 141.64 (C), 138.39 (CH), 129.58 (2CH), 129.02 (CH), 125.17 (C), 123.03 (CH), 120.29 (2CH), 115.96 (CH), 88.06 (C) ppm; IR (ATR):  $\tilde{\nu}$  = 3383 (N-H), 1591, 1507, 1462, 1313, 759 cm<sup>-1</sup>; LCMS:  $m/z$  calcd. for [C<sub>12</sub>H<sub>9</sub>ClIN+H]<sup>+</sup>: 329.95; found: 329.90.

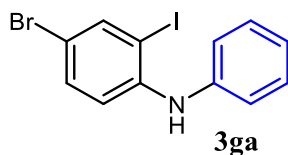

**4-Bromo-2-iodo-*N*-phenylaniline (3ga)**<sup>[1]</sup>: Compound **3ga** was prepared according to the general procedure from 4-bromo-2-iodoaniline **1g** (298 mg, 1 mmol) and phenylboronic acid **2a** (183 mg, 1.5 mmol), and purified by column chromatography on silica gel, eluting with hexane/ethyl acetate (99:1). Colourless gel (262 mg, 70%). <sup>1</sup>H NMR (500 MHz, CDCl<sub>3</sub>):  $\delta$  = 7.85 (d,  $J$  = 2.3 Hz, 1H, Ar-H), 7.30 (td,  $J$  = 7.4, 2.0 Hz, 2H, Ar-H), 7.26 (dd,  $J$  = 8.4, 2.4 Hz, 1H, Ar-H), 7.10-7.07 (m, 2H, Ar-H), 7.04 (tt,  $J$  = 7.2, 1.3 Hz, 1H, Ar-H), 7.00 (d,  $J$  = 8.8 Hz, 1H, Ar-H), 5.86 (brs, 1H, N-H) ppm; <sup>13</sup>C NMR (125 MHz, CDCl<sub>3</sub>):  $\delta$  = 143.63 (C), 141.68 (C), 141.20 (CH), 132.10 (CH), 129.81 (2CH), 123.40 (CH), 120.71 (2CH), 116.51 (CH), 112.23 (C), 88.63 (C) ppm; IR (ATR):  $\tilde{\nu}$  = 3386 (N-H), 2928, 1584, 1510, 1452, 1316, 1073, 1010, 812, 748 cm<sup>-1</sup>; LCMS:  $m/z$  calcd. for [C<sub>12</sub>H<sub>9</sub>BrIN+H]<sup>+</sup>: 373.90; found: 373.90.

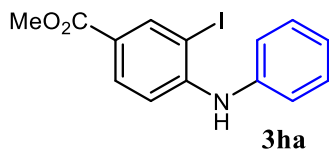

**Methyl 3-iodo-4-(phenylamino)benzoate (3ha)**<sup>[1]</sup>: Compound **3ha** was prepared from methyl 4-amino-3-iodobenzoate **1h** (277 mg, 1 mmol) and phenylboronic acid **2a** (183 mg, 1.5 mmol), and purified by column chromatography on silica gel, eluting with hexane/ethyl acetate (98:2). Colorless gel (244 mg, 69% yield). <sup>1</sup>H NMR (500 MHz, CDCl<sub>3</sub>):  $\delta$  = 8.43 (d,  $J$  = 2.0 Hz, 1H, Ar-H), 7.82 (dd,  $J$  = 8.5, 2.0 Hz, 1H, Ar-H), 7.37 (t,  $J$  = 7.5 Hz, 2H, Ar-H), 7.20 (d,  $J$  = 7.5 Hz, 2H, Ar-H), 7.16 (t,  $J$  = 7.5 Hz, 1H, Ar-H), 7.04 (d,  $J$  = 8.5 Hz, 1H, Ar-H), 6.32 (brs, 1H, N-H), 3.88 (s, 3H, CH<sub>3</sub>) ppm; <sup>13</sup>C NMR (125 MHz, CDCl<sub>3</sub>):  $\delta$  = 165.65 (C=O), 148.19 (C), 141.27 (CH), 140.11 (C), 130.95 (CH), 129.69 (2CH), 124.59 (CH), 122.52 (2CH), 122.20 (C), 112.22 (CH), 85.45 (C), 51.92 (CH<sub>3</sub>) ppm; IR (ATR):  $\tilde{\nu}$  = 3369 (N-H), 2947, 1708 (C=O), 1585, 1513, 1497, 1436, 1265, 1115, 762 cm<sup>-1</sup>; LCMS:  $m/z$  calcd. for [C<sub>14</sub>H<sub>12</sub>INO<sub>2</sub>+H]<sup>+</sup>: 353.99; found: 354.00.

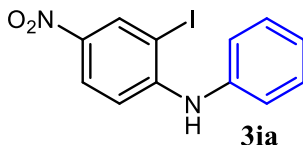

**2-Iodo-4-nitro-*N*-phenylaniline (3ia)**<sup>[1]</sup>: Compound **3ia** was prepared according to the general procedure from 2-iodo-4-nitroaniline **1i** (264 mg, 1 mmol) and phenylboronic acid **2a** (183 mg, 1.5 mmol), and purified by column chromatography on silica gel, eluting with hexane/ethyl acetate (97:3). Yellow gel (163 mg, 48% yield). <sup>1</sup>H NMR (500 MHz, CDCl<sub>3</sub>):  $\delta$  = 8.66 (d,  $J$  = 2.5 Hz, 1H, Ar-H), 8.07 (dd,  $J$  = 9.3, 2.2 Hz, 1H, Ar-H), 7.43 (td,  $J$  = 8.2, 0.6 Hz, 2H, Ar-H), 7.25-7.23 (m, 3H, Ar-H), 6.95 (d,  $J$  = 9.5 Hz, 1H, Ar-H), 6.59 (brs, 1H, N-H) ppm; <sup>13</sup>C NMR (125 MHz, CDCl<sub>3</sub>):  $\delta$  = 150.15 (C), 139.77 (C), 139.01 (C), 135.64 (CH), 129.97 (2CH), 125.97 (CH), 125.55 (CH), 123.72 (2CH), 110.96 (CH), 83.60 (C) ppm; IR (ATR):  $\tilde{\nu}$  = 3360 (N-H), 2917, 1572, 1490 (N-O), 1308, 1281, 1113, 893, 743 cm<sup>-1</sup>; LCMS:  $m/z$  calcd. for [C<sub>12</sub>H<sub>9</sub>IN<sub>2</sub>O<sub>2</sub>+H]<sup>+</sup>: 340.97; found: 341.10.

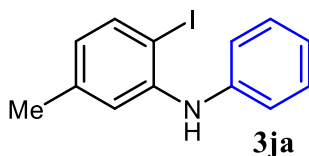

**2-Iodo-5-methyl-*N*-phenylaniline (3ja)**<sup>[1]</sup>: Compound **3ja** was prepared according to the general procedure from 2-iodo-5-methylaniline **1j** (233 mg, 1 mmol) and phenylboronic acid **2a** (183 mg, 1.5 mmol), and purified by column chromatography on silica gel, eluting with hexane/ethyl acetate (99:1). Orange gel (219 mg, 71%); <sup>1</sup>H NMR (500 MHz, CDCl<sub>3</sub>):  $\delta$  = 7.61 (d,  $J$  = 8.0 Hz, 1H, Ar-H), 7.31 (td,  $J$  = 7.5, 2.0 Hz, 2H, Ar-H), 7.11 (dt,  $J$  = 7.4, 1.2 Hz, 2H, Ar-H), 7.02 (tt,  $J$  = 7.5, 1.2 Hz, 2H, Ar-H), 6.46 (dd,  $J$  = 8.0, 2.5 Hz, 1H, Ar-H), 5.91 (brs, 1H, N-H), 2.22 (s, 3H, CH<sub>3</sub>) ppm; <sup>13</sup>C NMR (125 MHz, CDCl<sub>3</sub>):  $\delta$  = 143.67 (C), 142.05 (C), 139.26 (C), 139.12 (CH), 129.44 (2CH), 123.17 (CH), 122.39 (CH), 119.96 (2CH), 116.66 (CH), 84.89 (C), 21.24 (CH<sub>3</sub>) ppm; IR (ATR):  $\tilde{\nu}$  = 3379 (N-H), 2920, 1587, 1515, 1309, 1008, 744 cm<sup>-1</sup>; LCMS:  $m/z$  calcd. for [C<sub>13</sub>H<sub>12</sub>IN-H]<sup>+</sup>: 310.00; found: 310.20.

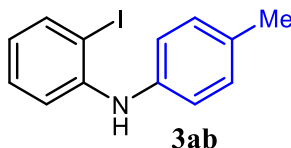

**2-Iodo-*N*-(*p*-tolyl)aniline (3ab)**<sup>[1]</sup>: Compound **3ab** was prepared from 2-iodoaniline **1a** (219 mg, 1 mmol) and *p*-tolylboronic acid **2b** (205 mg, 1.5 mmol), and purified by column chromatography on silica gel, eluting with hexane/ethyl acetate (99:1). Light yellow gel (247 mg, 80% yield). <sup>1</sup>H NMR (500 MHz, CDCl<sub>3</sub>):  $\delta$  = 7.74 (dd,  $J$  = 7.8, 1.5 Hz, 1H, Ar-H), 7.17-7.12 (m, 3H, Ar-H), 7.08-7.03 (m, 3H, Ar-H), 6.56 (td,  $J$  = 7.4, 1.6 Hz, 1H, Ar-H), 5.83 (brs, 1 H, N-H), 2.32 (s, 3H, CH<sub>3</sub>) ppm; <sup>13</sup>C NMR (125 MHz, CDCl<sub>3</sub>):  $\delta$  = 144.88 (C), 139.64 (CH), 139.41 (C),

132.07 (C), 130.10 (2CH), 129.23 (CH), 121.40 (3CH), 115.14 (CH), 88.04 (C), 21.02 (CH<sub>3</sub>) ppm; IR (ATR):  $\tilde{\nu}$  = 3378 (N–H), 2920, 1587, 1514, 1448, 1308, 1007, 806, 743 cm<sup>-1</sup>; LCMS:  $m/z$  calcd. for [C<sub>13</sub>H<sub>12</sub>IN+H]<sup>+</sup>: 310.00; found: 310.00.

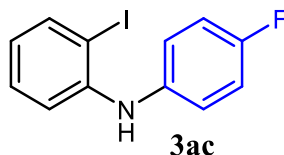

***N*-(4-fluorophenyl)-2-iodoaniline (3ac)**<sup>[1]</sup>: Compound **3ac** was prepared according to the general procedure from 2-iodoaniline **1a** (219 mg, 1 mmol) and 4-fluorophenylboronic acid **2c** (210 mg, 1.5 mmol), and purified by column chromatography on silica gel, eluting with hexane/ethyl acetate (98:2). Red gel (213 mg, 68%). <sup>1</sup>H NMR (400 MHz, CDCl<sub>3</sub>):  $\delta$  = 7.73 (dd,  $J$  = 7.9, 1.2 Hz, 1H, Ar–H), 7.15 (td,  $J$  = 8.2, 1.2 Hz, 1H, Ar–H), 7.11–7.07 (m, 2H, Ar–H), 7.03–6.96 (m, 3H, Ar–H), 6.58 (td,  $J$  = 8.4, 1.2 Hz, 1H, Ar–H) ppm; <sup>13</sup>C NMR (100 MHz, CDCl<sub>3</sub>):  $\delta$  = 156.61 (d,  $J_{CF}$  = 234.6 Hz, C), 144.70 (C), 140.12 (C), 139.57 (2CH), 129.07 (2CH), 123.33 (d,  $J_{CF}$  = 4.4 Hz, CH), 119.41 (d,  $J_{CF}$  = 7.5 Hz, CH), 119.34 (d,  $J_{CF}$  = 7.5 Hz, CH), 115.53 (d,  $J_{CF}$  = 22.1 Hz, CH), 91.87 (C) ppm; IR (ATR):  $\tilde{\nu}$  = 3350 (N–H), 2900, 1495, 1455, 1242, 1177, 1031, 828 cm<sup>-1</sup>; LCMS:  $m/z$  calcd. for [C<sub>12</sub>H<sub>9</sub>FIN+H]<sup>+</sup>: 313.98; found: 314.00.

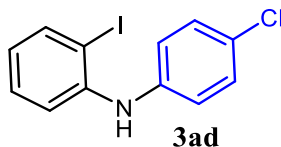

***N*-(4-chlorophenyl)-2-iodoaniline (3ad)**: Compound **3ad** was prepared according to the general procedure from 2-iodoaniline **1a** (219 mg, 1 mmol) and 4-chlorophenylboronic acid **2d** (234 mg, 1.5 mmol), and purified by column chromatography on silica gel, eluting with hexane/ethyl acetate (98:2). Brown gel (241 mg, 73%). <sup>1</sup>H NMR (500 MHz, CDCl<sub>3</sub>):  $\delta$  = 7.77 (dd,  $J$  = 8.0, 1.5 Hz, 1H, Ar–H), 7.26–7.13 (m, 4H, Ar–H), 7.05–7.02 (m, 2H, Ar–H), 6.65 (td,  $J$  = 7.0, 1.5 Hz, 1H, Ar–H), 5.85 (brs, 1H, N–H) ppm; <sup>13</sup>C NMR (125 MHz, CDCl<sub>3</sub>):  $\delta$  = 143.48 (C), 140.72 (C), 139.61 (CH), 129.44 (2CH), 129.12 (CH), 127.19 (C), 122.45 (CH), 120.93 (2CH), 116.18 (CH), 89.13 (C) ppm; IR (ATR):  $\tilde{\nu}$  = 3381 (N–H), 2929, 1585, 1505, 1450, 1311, 1012, 750 cm<sup>-1</sup>; LCMS:  $m/z$  calcd. for [C<sub>12</sub>H<sub>9</sub>ClIN+H]<sup>+</sup>: 329.95; found: 330.00.

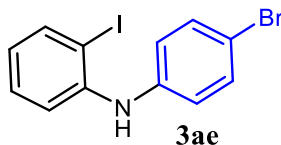

***N*-(4-bromophenyl)-2-iodoaniline (3ae)**<sup>[1]</sup>: Compound **3ae** was prepared according to the general procedure from 2-iodoaniline **1a** (233 mg, 1 mmol) and (4-bromophenyl)boronic acid **2e** (301 mg, 1.5 mmol), and purified by column chromatography on silica gel, eluting with hexane/ethyl acetate (99:1). Off white solid (266 mg, 71%); m.p.: 46–48 °C. <sup>1</sup>H NMR (400 MHz, CDCl<sub>3</sub>):  $\delta$  = 7.78 (d,  $J$  = 8.0 Hz, 1H, Ar–H), 7.39 (dd,  $J$  = 8.4, 2.0 Hz, 2H, Ar–H), 7.23–7.15

(m, 2H, Ar-H), 6.98 (dd,  $J = 8.4, 1.6$  Hz, 2H, Ar-H), 6.66 (td,  $J = 7.6, 1.6$  Hz, 1H, Ar-H), 5.84 (brs, 1H, N-H) ppm;  $^{13}\text{C}$  NMR (125 MHz,  $\text{CDCl}_3$ ):  $\delta = 143.35$  (C), 141.35 (C), 139.67 (CH), 132.40 (2CH), 129.17 (CH), 122.68 (CH), 121.10 (2CH), 116.53 (CH), 114.48 (C), 89.46 (C) ppm; IR (ATR):  $\tilde{\nu} = 3385$  (N-H), 2927, 1584, 1509, 1452, 1315, 1009, 748  $\text{cm}^{-1}$ ; LCMS:  $m/z$  calcd. for  $[\text{C}_{12}\text{H}_9\text{BrIN}+\text{H}]^+$ : 373.90; found: 373.90.

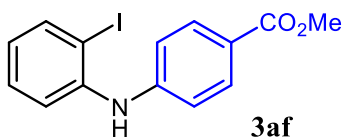

**Methyl 4-((2-iodophenyl)amino)benzoate (3af)**<sup>[1]</sup>: Compound **3af** was prepared according to the general procedure from 2-iodoaniline **1a** (219 mg, 1 mmol) and 4-carbomethoxyphenylboronic acid **2f** (270 mg, 1.5 mmol), and purified by column chromatography on silica gel, eluting with hexane/ethyl acetate (90:10). Colorless gel (247 mg, 70%).  $^1\text{H}$  NMR (500 MHz,  $\text{CDCl}_3$ ):  $\delta = 7.95$  (dd,  $J = 7.0, 2.0$  Hz, 2H, Ar-H), 7.83 (dd,  $J = 8.0, 1.5$  Hz, 1H, Ar-H), 7.37 (dd,  $J = 8.0, 1.5$  Hz, 1H, Ar-H), 7.29 (td,  $J = 8.5, 1.5$  Hz, 1H, Ar-H), 7.03 (dd,  $J = 7.0, 2.0$  Hz, 2H, Ar-H), 6.76 (td,  $J = 7.5, 1.5$  Hz, 1H, Ar-H), 6.07 (brs, 1H, N-H), 3.88 (s, 3H,  $\text{CH}_3$ ) ppm;  $^{13}\text{C}$  NMR (125 MHz,  $\text{CDCl}_3$ ):  $\delta = 166.81$  (C=O), 147.02 (C), 141.86 (C), 139.81 (CH), 131.49 (2CH), 129.18 (CH), 124.35 (CH), 122.44 (C), 119.48 (CH), 115.97 (2CH), 91.77 (C), 51.82 ( $\text{CH}_3$ ) ppm; IR (ATR):  $\tilde{\nu} = 3379, 3338$  (N-H), 2946, 1702 (C=O), 1605, 1585, 1518, 1434, 1279, 1175, 1110, 1012, 767  $\text{cm}^{-1}$ ; LCMS:  $m/z$  calcd. for  $[\text{C}_{14}\text{H}_{12}\text{INO}_2+\text{H}]^+$ : 353.99; found: 354.00.

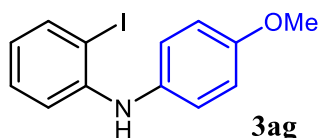

**2-Iodo-N-(4-methoxyphenyl)aniline (3ag)**<sup>[1]</sup>: Compound **3ag** was prepared from 2-iodoaniline **1a** (219 mg, 1 mmol) and 4-methoxyphenylboronic acid **2g** (228 mg, 1.5 mmol), and purified by column chromatography on silica gel, eluting with hexane/ethyl acetate (98:2). Light yellow gel (247 mg, 76% yield).  $^1\text{H}$  NMR (500 MHz,  $\text{CDCl}_3$ ):  $\delta = 7.71$  (dd,  $J = 8.0, 1.5$  Hz, 1H, Ar-H), 7.12-7.09 (m, 3H, Ar-H), 6.89-6.86 (m, 3H, Ar-H), 6.52 (td,  $J = 8.0, 1.5$  Hz, 1H, Ar-H), 5.77 (brs, 1H, N-H), 3.81 (s, 3H,  $\text{CH}_3$ ) ppm;  $^{13}\text{C}$  NMR (125 MHz,  $\text{CDCl}_3$ ):  $\delta = 156.41$  (C), 145.74 (C), 139.35 (CH), 134.56 (C), 129.09 (CH), 124.60 (2CH), 120.53 (CH), 114.80 (2CH), 113.81 (CH), 86.61 (C), 55.58 ( $\text{CH}_3$ ) ppm; IR (ATR):  $\tilde{\nu} = 3392$  (N-H), 3186, 2361, 1624, 1582, 1473, 1438, 1300, 1005, 893, 743  $\text{cm}^{-1}$ ; LCMS:  $m/z$  calcd. for  $[\text{C}_{13}\text{H}_{12}\text{INO}+\text{H}]^+$ : 326.00; found: 326.00.

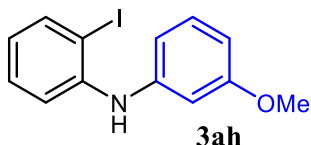

**2-Iodo-*N*-(3-methoxyphenyl)aniline (3ah)**<sup>[1]</sup>: Compound **3ah** was prepared according to the general procedure from 2-iodoaniline **1a** (219 mg, 1 mmol) and 3-methoxyphenylboronic acid **2h** (228 mg, 1.5 mmol), and purified by column chromatography on silica gel, eluting with hexane/ethyl acetate (98:2). Light yellow gel (234 mg, 72%). <sup>1</sup>H NMR (500 MHz, CDCl<sub>3</sub>):  $\delta$  = 7.77 (dd,  $J$  = 8.0, 1.5 Hz, 1H, Ar-H), 7.23-7.18 (m, 3H, Ar-H), 6.67 (dd,  $J$  = 8.0, 2.0 Hz, 1H, Ar-H), 6.42 (t,  $J$  = 2.0 Hz, 1H, Ar-H), 6.62 (td,  $J$  = 8.0, 2.0 Hz, 1H, Ar-H), 6.57 (ddd,  $J$  = 8.0, 2.0, 0.5 Hz, 1H, Ar-H), 5.89 (brs, 1H, N-H), 3.79 (s, 3H, CH<sub>3</sub>) ppm; <sup>13</sup>C NMR (125 MHz, CDCl<sub>3</sub>):  $\delta$  = 160.96 (C), 143.87 (C), 143.64 (C), 139.73 (CH), 130.39 (CH), 129.25 (CH), 122.41 (CH), 116.85 (CH), 112.31 (CH), 108.00 (CH), 105.61 (CH), 89.40 (C), 55.49 (CH<sub>3</sub>) ppm; IR (ATR):  $\tilde{\nu}$  = 3384 (N-H), 2982, 2358, 1601, 1492, 1158, 1044, 1009, 745 cm<sup>-1</sup>. LCMS:  $m/z$  calcd. for [C<sub>13</sub>H<sub>12</sub>INO+H]<sup>+</sup>: 326.00; found: 326.00.

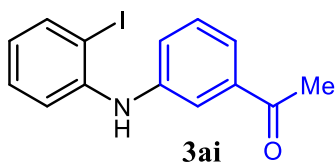

**2-Iodo-*N*-(3-acetylphenyl)aniline (3ai)**<sup>[1]</sup>: Compound **3ai** was prepared from 2-iodoaniline **1a** (219 mg, 1 mmol) and 3-acetylphenylboronic acid **2i** (184 mg, 1.5 mmol), and purified by column chromatography on silica gel, eluting with hexane/ethyl acetate (95:5). Off-white solid (216 mg, 64% yield); m.p.: 86-88 °C. <sup>1</sup>H NMR (500 MHz, CDCl<sub>3</sub>):  $\delta$  = 7.80 (dd,  $J$  = 8.0, 1.0 Hz, 1H, Ar-H), 7.67 (t,  $J$  = 2.0 Hz, 1H, Ar-H), 7.57 (dd,  $J$  = 8.0, 1.5 Hz, 1H, Ar-H), 7.38 (t,  $J$  = 8.0 Hz, 1H, Ar-H), 7.30 (dd,  $J$  = 8.0, 2.5 Hz, 1H, Ar-H), 7.22 (td,  $J$  = 7.0, 1.5 Hz, 2H, Ar-H), 6.68 (td,  $J$  = 8.5, 2.5 Hz, 1H, Ar-H), 5.97 (brs, 1H, N-H), 2.56 (s, 3H, CH<sub>3</sub>) ppm; <sup>13</sup>C NMR (125 MHz, CDCl<sub>3</sub>):  $\delta$  = 197.89 (C=O), 143.17 (C), 142.81 (C), 139.73 (CH), 138.55 (C), 129.67 (CH), 129.22 (CH), 123.50 (CH), 122.94 (CH), 122.17 (CH), 118.44 (CH), 116.77 (CH), 89.76 (C), 26.75 (CH<sub>3</sub>) ppm; IR (ATR):  $\tilde{\nu}$  = 3328 (N-H), 2921, 1670 (C=O), 1596, 1575, 1518, 1480, 1439, 1353, 1308, 1006, 905, 784, 750 cm<sup>-1</sup>; LCMS:  $m/z$  calcd. for [C<sub>14</sub>H<sub>12</sub>INO+H]<sup>+</sup>: 338.00; found: 338.20.

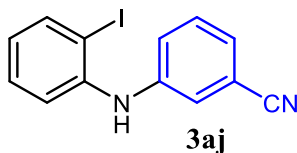

**2-Iodo-*N*-(3-cyanophenyl)aniline (3aj)**<sup>[1]</sup>: Compound **3aj** was prepared from 2-iodoaniline **1a** (219 mg, 1 mmol) and 3-cyanophenylboronic acid **2j** (220 mg, 1.5 mmol), and purified by column chromatography on silica gel, eluting with hexane/ethyl acetate (98:2). Off-white solid (202 mg, 63% yield); m.p.: 92-94 °C. <sup>1</sup>H NMR (500 MHz, CDCl<sub>3</sub>):  $\delta$  = 7.83 (dd,  $J$  = 8.0, 1.5 Hz, 1H, Ar-H), 7.35 (t,  $J$  = 8.0 Hz, 1H, Ar-H), 7.31-7.21 (m, 5H, Ar-H), 6.76 (td,  $J$  = 8.0, 1.5 Hz, 1H, Ar-H), 5.93 (brs, 1H, N-H) ppm; <sup>13</sup>C NMR (125 MHz, CDCl<sub>3</sub>):  $\delta$  = 143.64 (C), 142.09 (C), 139.92 (CH), 130.35 (CH), 129.35 (CH), 124.87 (CH), 124.28 (CH), 122.23 (CH), 120.46 (CH), 118.75 (C), 118.54 (CH), 113.44



(CN), 91.27 (C) ppm; IR (ATR):  $\tilde{\nu}$  = 3342 (N–H), 2917, 2227 (C–N), 1601, 1573, 1520, 1460, 1344, 1300, 1014, 848, 785, 757  $\text{cm}^{-1}$ ; LCMS:  $m/z$  calcd. for  $[\text{C}_{13}\text{H}_9\text{IN}_2+\text{H}]^+$ : 320.98; found: 321.00.

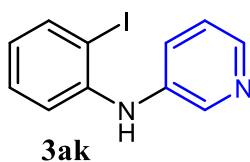

**N-(2-iodophenyl)pyridin-3-amine (3ak)**<sup>[1]</sup>: Compound **3ak** was prepared according to the general procedure from 2-iodoaniline **1a** (109 mg, 0.5 mmol) and 3-pyridylboronic acid **2k** (92 mg, 0.75 mmol); and purified by column chromatography on silica gel, eluting with hexane/ethyl acetate (85:15). Red gel (96 mg, 65%);  $^1\text{H}$  NMR (400 MHz,  $\text{CDCl}_3$ ):  $\delta$ =8.38 (d,  $J$ =2.8 Hz, 1H; Ar–H), 8.20 (dd,  $J$ =4.8, 1.2 Hz, 1H; Ar–H), 7.73 (dd,  $J$ = 8.0, 1.6 Hz, 1H; Ar–H), 7.38-7.35 (m, 1H; Ar–H), 7.17-7.14 (m, 2H; Ar–H), 7.11-7.09 (m, 1H; Ar–H), 6.63 (ddd,  $J$ = 8.2, 7.6, 1.6 Hz, 1H; Ar–H), 5.80 (brs, 1H; N–H) ppm;  $^{13}\text{C}$  NMR (125 MHz,  $\text{CDCl}_3$ ):  $\delta$ = 143.47 (CH), 142.94 (CH), 141.90 (CH), 139.79 (CH), 138.82 (C), 129.27 (CH), 125.83 (CH), 123.88 (C), 123.15 (CH), 116.44 (CH), 89.68 (C) ppm; IR (ATR):  $\tilde{\nu}$  = 3385 (N–H), 3024, 2361, 1570, 1485, 1325, 1050, 755  $\text{cm}^{-1}$ . LCMS:  $m/z$  calcd. for  $[\text{C}_{11}\text{H}_9\text{IN}_2+\text{H}]^+$ : 296.98; found: 297.00.

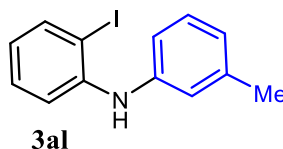

**2-Iodo-N-(m-tolyl)aniline (3al)**: Compound **3al** was prepared according to the general procedure from 2-iodoaniline **1a** (219 mg, 1 mmol) and m-tolylboronic acid **2l** (205 mg, 1.5 mmol), and purified by column chromatography on silica gel, eluting with hexane/ethyl acetate (98:2). Light Brown solid (216 mg, 70%).  $^1\text{H}$  NMR (400 MHz,  $\text{CDCl}_3$ ):  $\delta$  = 7.81 (d,  $J$  = 8.0 Hz, 1H, Ar–H), 7.26-7.24 (m, 3H, Ar–H), 7.01-6.90 (m, 3H, Ar–H), 6.69-6.65 (m, 1H, Ar–H), 5.93 (brs, 1H, N–H), 2.31 (s, 3H, -CH<sub>3</sub>) ppm;  $^{13}\text{C}$  NMR (125 MHz,  $\text{CDCl}_3$ ):  $\delta$  = 144.48 (C), 142.38 (C), 139.95 (CH), 139.86 (C), 129.73 (CH), 129.48 (CH), 123.88 (CH), 122.23 (CH), 121.17 (CH), 117.49 (CH), 116.36 (CH), 89.18 (C), 21.94 (CH<sub>3</sub>) ppm; LCMS:  $m/z$  calcd. for  $[\text{C}_{13}\text{H}_{12}\text{IN}+\text{H}]^+$ : 310.00; found: 310.20.

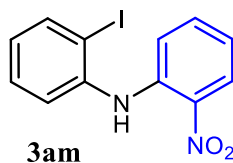

**2-Iodo-N-(2-nitrophenyl)aniline (3am)**<sup>[1]</sup>: Compound **3am** was prepared according to the general procedure from 2-iodoaniline **1a** (219 mg, 1 mmol) and 2-nitrophenylboronic acid **2m** (250 mg, 1.5 mmol), and purified by column chromatography on silica gel, eluting with hexane/ethyl acetate (95:5). Red solid (163 mg, 48%); m.p.: 62-64 °C.  $^1\text{H}$  NMR (400 MHz,  $\text{CDCl}_3$ ):  $\delta$  = 9.33 (brs, 1 H, N–H), 8.16 (dd,  $J$  = 8.4, 1.2 Hz, 1H, Ar–H), 7.88 (dd,  $J$  = 8.2, 1.2 Hz, 1H, Ar–H), 7.34-7.29 (m, 3H, Ar–H), 6.96 (dd,  $J$  = 8.8, 1.2 Hz, 1H, Ar–H), 6.89 (ddd,  $J$  = 8.4, 8.4, 2.8 Hz, 1H, Ar–H), 6.77 (ddd,  $J$  = 8.4, 7.2, 1.2 Hz, 1H, Ar–H) ppm;  $^{13}\text{C}$  NMR (125 MHz,  $\text{CDCl}_3$ ):  $\delta$  = 141.99 (C), 140.71 (C), 140.34

(CH), 135.67 (CH), 133.84 (C), 129.28 (CH), 127.27 (CH), 126.72 (CH), 125.12 (CH), 118.42 (CH), 116.20 (CH), 96.41 (C) ppm; IR (ATR):  $\tilde{\nu}$  = 3325 (N–H), 2920, 2359, 1610, 1570, 1510 (N–O), 1346, 1252, 1145, 738  $\text{cm}^{-1}$ ; LCMS:  $m/z$  calcd. for  $[\text{C}_{12}\text{H}_9\text{IN}_2\text{O}_2+\text{H}]^+$ : 340.97; found: 341.00.

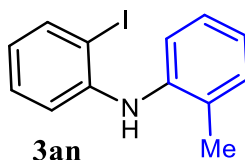

**2-Iodo-N-(o-tolyl)aniline (3an):** Compound **3an** was prepared according to the general procedure from 2-iodoaniline **1a** (219 mg, 1 mmol) and 2-methylphenylboronic acid **2n** (205 mg, 1.5 mmol), and purified by column chromatography on silica gel, eluting with hexane/ethyl acetate (98:2). Brown gel (161 mg, 52%).  $^1\text{H}$  NMR (400 MHz,  $\text{CDCl}_3$ ):  $\delta$  = 7.74 (d,  $J$  = 7.7 Hz, 1H, Ar–H), 7.23–7.12 (m, 4H, Ar–H), 7.04–7.01 (m, 1H, Ar–H), 6.83 (d,  $J$  = 8.0 Hz, 1H, Ar–H), 6.56 (t,  $J$  = 7.8 Hz, 1H, Ar–H), 2.25 (s, 3H,  $-\text{CH}_3$ ) ppm;  $^{13}\text{C}$  NMR (125 MHz,  $\text{CDCl}_3$ ):  $\delta$  = 155.18 (C), 144.51 (C), 140.02 (C), 139.30 (CH), 131.10 (CH), 129.05 (CH), 126.84 (CH), 123.74 (CH), 121.69 (CH), 121.06 (CH), 114.94 (CH), 87.78 (C), 18.00 ( $\text{CH}_3$ ) ppm; IR (ATR):  $\tilde{\nu}$  = 3390 (N–H), 2911, 1580, 1512, 1480, 1452, 1373, 1301, 1247, 1155, 1041, 1002, 890, 807, 744, 683, 645  $\text{cm}^{-1}$ ; LCMS:  $m/z$  calcd. for  $[\text{C}_{13}\text{H}_{12}\text{IN}+\text{H}]^+$ : 310.00; found: 310.10.

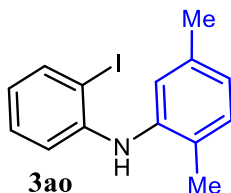

**N-(2-iodophenyl)-2,5-dimethylaniline (3ao):** Compound **3ao** was prepared according to the general procedure from 2-iodoaniline **1a** (219 mg, 1 mmol) and 2,5-dimethylphenylboronic acid **2o** (225 mg, 1.5 mmol), and purified by column chromatography on silica gel, eluting with hexane/ethyl acetate (98:2). Colourless gel (178 mg, 55%).  $^1\text{H}$  NMR (500 MHz,  $\text{CDCl}_3$ ):  $\delta$  = 7.74 (dd,  $J$  = 8.0, 2.0, Hz, 1H, Ar–H), 7.16 (d,  $J$  = 2.0, 1H, Ar–H), 7.13 (t,  $J$  = 7.5, Hz, 1H, Ar–H), 7.03 (s, 1H, Ar–H), 6.85 (dd,  $J$  = 7.5, 1.0 Hz, 1H, Ar–H), 6.82 (dd,  $J$  = 8.0, 1.5 Hz, 1H, Ar–H), 6.56 (td,  $J$  = 7.5, 1.5 Hz, 1H, Ar–H), 5.69 (brs, 1H, N–H), 2.29 (s,  $\text{CH}_3$ ), 2.21 (s,  $\text{CH}_3$ ) ppm;  $^{13}\text{C}$  NMR (125 MHz,  $\text{CDCl}_3$ ):  $\delta$  = 144.70 (C), 139.79 (C), 139.26 (CH), 136.58 (C), 130.89 (CH), 129.04 (CH), 127.83 (C), 124.61 (CH), 122.56 (CH), 120.88 (CH), 114.91 (CH), 87.64 (C), 21.05 ( $\text{CH}_3$ ), 17.53 ( $\text{CH}_3$ ) ppm; IR (ATR):  $\tilde{\nu}$  = 3391 (N–H), 2916, 2850, 1580, 1515, 1484, 1448, 1375, 1304, 1253, 1156, 1121, 1043, 1002, 878, 807, 744, 683, 564  $\text{cm}^{-1}$ ; LCMS:  $m/z$  calcd. for  $[\text{C}_{14}\text{H}_{14}\text{IN}+\text{H}]^+$ : 324.02; found: 324.20.

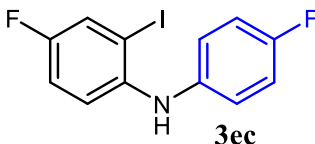

**4-Fluoro-N-(4-fluorophenyl)-2-iodoaniline (3ec):** Compound **3ec** was prepared according to the general procedure from 4-fluoro-2-iodoaniline **1e** (237 mg, 1 mmol) and 4-fluorophenylboronic acid **2c** (210 mg, 1.5 mmol),

and purified by column chromatography on silica gel, eluting with hexane/ethyl acetate (98:2). Colourless gel (248 mg, 75%).  $^1\text{H}$  NMR (500 MHz,  $\text{CDCl}_3$ ):  $\delta$  = 7.50 (dd,  $J$  = 8.0, 2.5 Hz, 1H, Ar–H), 7.02–6.92 (m, 6H, Ar–H), 5.60 (brs, 1H, N–H) ppm;  $^{13}\text{C}$  NMR (125 MHz,  $\text{CDCl}_3$ ):  $\delta$  = 158.67 (d,  $J_{\text{CF}}$  = 240.0 Hz, C), 156.46 (d,  $J_{\text{CF}}$  = 242.2 Hz, C), 141.20 (d,  $J_{\text{CF}}$  = 2.4 Hz, C), 138.52 (d,  $J_{\text{CF}}$  = 2.5 Hz, C), 125.84 (d,  $J_{\text{CF}}$  = 24.7 Hz, CH), 121.87 (d,  $J_{\text{CF}}$  = 8.1 Hz, CH), 116.30 (2CH), 116.18 (d,  $J_{\text{CF}}$  = 14.7 Hz, CH), 115.98 (d,  $J_{\text{CF}}$  = 22.2 Hz, CH), 87.73 (d,  $J_{\text{CF}}$  = 8.6 Hz, C) ppm; IR (ATR):  $\tilde{\nu}$  = 3360 (N–H), 2925, 2850, 1881, 1575, 1506, 1460, 1380, 1306, 1230, 1210, 1160, 1080, 1020, 850, 780, 725, 650  $\text{cm}^{-1}$ ; LCMS:  $m/z$  calcd. for  $[\text{C}_{12}\text{H}_8\text{F}_2\text{IN}+\text{H}]^+$ : 331.97; found: 332.00.

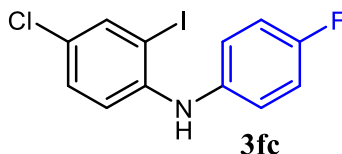

**4-Chloro-N-(4-fluorophenyl)-2-iodoaniline (3fc):** Compound **3fc** was prepared according to the general procedure from 4-chloro-2-iodoaniline **1f** (253 mg, 1 mmol) and 4-fluorophenylboronic acid **2c** (210 mg, 1.5 mmol), and purified by column chromatography on silica gel, eluting with hexane/ethyl acetate (98:2). Colourless gel (250 mg, 72%).  $^1\text{H}$  NMR (400 MHz,  $\text{CDCl}_3$ ):  $\delta$  = 7.75 (d,  $J$  = 4.0 Hz, 1H, Ar–H), 7.17–7.04 (m, 5H, Ar–H), 6.92–6.89 (m, 1H, Ar–H), 5.82 (brs, 1H, N–H) ppm;  $^{13}\text{C}$  NMR (100 MHz,  $\text{CDCl}_3$ ):  $\delta$  = 159.24 (d,  $J_{\text{CF}}$  = 242.0 Hz, C), 143.69 (C), 138.39 (CH), 137.46 (d,  $J_{\text{CF}}$  = 3.0 Hz, C), 129.14 (CH), 124.80 (C), 123.44 (d,  $J_{\text{CF}}$  = 4.0 Hz, 2CH), 116.37 (d,  $J_{\text{CF}}$  = 22.0 Hz, 2CH), 114.93 (CH), 87.14 (C) ppm; IR (ATR):  $\tilde{\nu}$  = 3383 (N–H), 2921, 2854, 1878, 1582, 1508, 1453, 1376, 1225, 1153, 1089, 866, 779  $\text{cm}^{-1}$ ; LCMS:  $m/z$  calcd. for  $[\text{C}_{12}\text{H}_8\text{ClFIN}+\text{H}]^+$ : 347.94; found: 348.00.

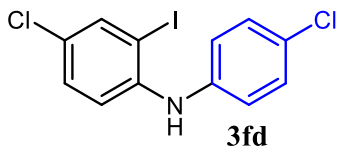

**4-Chloro-N-(4-chlorophenyl)-2-iodoaniline (3fd):** Compound **3fd** was prepared according to the general procedure from 4-chloro-2-iodoaniline **1f** (253 mg, 1 mmol) and 4-chlorophenylboronic acid **2d** (234 mg, 1.5 mmol), and purified by column chromatography on silica gel, eluting with hexane/ethyl acetate (98:2). Off White solid (262 mg, 72%); mp: 60–62  $^{\circ}\text{C}$ ;  $^1\text{H}$  NMR (500 MHz,  $\text{CDCl}_3$ ):  $\delta$  = 7.74 (d,  $J$  = 8.0 Hz, 1H, Ar–H), 7.28–7.26 (m, 2H, Ar–H), 7.18–7.16 (m, 1H, Ar–H), 7.03–7.01 (m, 3H, Ar–H), 5.80 (brs, 1H, N–H) ppm;  $^{13}\text{C}$  NMR (125 MHz,  $\text{CDCl}_3$ ):  $\delta$  = 142.49 (C), 140.33 (C), 138.50 (CH), 129.57 (2CH), 129.12 (CH), 127.74 (C), 125.77 (C), 121.23 (2CH), 116.28 (CH), 88.48 (C) ppm; IR (ATR):  $\tilde{\nu}$  = 3382 (N–H), 2950, 2855, 1712, 1604, 1575, 1505, 1471, 1360, 1215, 1153, 1098, 1040, 919, 871, 835, 767, 676, 567  $\text{cm}^{-1}$ ; LCMS:  $m/z$  calcd. for  $[\text{C}_{12}\text{H}_8\text{Cl}_2\text{IN}+\text{H}]^+$ : 363.91; found: 364.00.

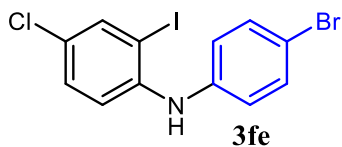

**4-Chloro-2-iodo-*N*-(4-bromophenyl)aniline (3fe)**<sup>[1]</sup>: Compound **3fe** was prepared according to the general procedure from 4-chloro-2-iodoaniline **1f** (253 mg, 1.0 mmol) and 4-bromophenylboronic acid **2e** (301 mg, 1.5 mmol), and purified by column chromatography on silica gel, eluting with hexane/ethyl acetate (99:1). Off-white solid (282 mg, 69%); mp: 60-62 °C. <sup>1</sup>H NMR (500 MHz, CDCl<sub>3</sub>):  $\delta$  = 7.74 (d,  $J$  = 2.0 Hz, 1H, Ar-H), 7.40 (dt,  $J$  = 8.7, 3.0 Hz, 2H, Ar-H), 7.18 (dd,  $J$  = 8.5, 2.0 Hz, 1H, Ar-H), 7.05 (d,  $J$  = 9.0 Hz, 1H, Ar-H), 6.95 (dt,  $J$  = 8.8, 3.0 Hz, 2H, Ar-H), 5.79 (brs, 1H, N-H) ppm; <sup>13</sup>C NMR (125 MHz, CDCl<sub>3</sub>):  $\delta$  = 142.33 (C), 140.94 (C), 138.54 (CH), 132.51 (2CH), 129.14 (CH), 126.01 (C), 121.36 (2CH), 116.58 (CH), 115.03 (C), 88.77 (C) ppm; IR (ATR):  $\tilde{\nu}$  = 3368 (N-H), 2924, 1576, 1482, 1377, 1305, 1265, 1067, 1007, 867, 802, 694 cm<sup>-1</sup>; LCMS:  $m/z$  calcd. for [C<sub>12</sub>H<sub>8</sub>BrClIN+H]<sup>+</sup>: 407.86; found: 407.90.

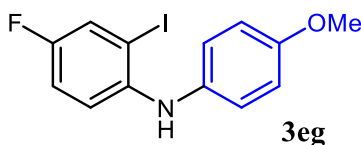

**4-Fluoro-2-iodo-*N*-(4-methoxyphenyl)aniline (3eg)**<sup>[1]</sup>: Compound **3eg** was prepared from 4-fluoro-2-iodoaniline **1e** (237 mg, 1 mmol) and 4-methoxyphenylboronic acid **2g** (228 mg, 1.5 mmol), and purified by column chromatography on silica gel, eluting with hexane/ethyl acetate (95:5). Colorless gel (243 mg, 71% yield). <sup>1</sup>H NMR (500 MHz, CDCl<sub>3</sub>):  $\delta$  = 7.46 (dd,  $J$  = 8.0, 3.0 Hz, 1H, Ar-H), 7.05-7.03 (m, 2H, Ar-H), 6.89-6.84 (m, 3H, Ar-H), 6.83 (dd,  $J$  = 9.0, 5.0 Hz, 1H, Ar-H), 5.58 (brs, 1H, N-H), 3.80 (s, 3H, CH<sub>3</sub>) ppm; <sup>13</sup>C NMR (125 MHz, CDCl<sub>3</sub>):  $\delta$  = 156.18 (C), 155.85 (d,  $J_{CF}$  = 240.9 Hz, C), 142.43 (d,  $J_{CF}$  = 2.4 Hz, C), 135.24 (C), 125.61 (d,  $J_{CF}$  = 24.5 Hz, CH), 123.71 (2CH), 115.86 (d,  $J_{CF}$  = 22.1 Hz, CH), 114.88 (2CH), 114.75 (d,  $J_{CF}$  = 7.4 Hz, CH), 85.95 (d,  $J_{CF}$  = 8.8 Hz, C), 55.59 (CH<sub>3</sub>) ppm; IR (ATR):  $\tilde{\nu}$  = 3383 (N-H), 2917, 1507, 1237, 1034, 831 cm<sup>-1</sup>; LCMS:  $m/z$  calcd. for [C<sub>13</sub>H<sub>11</sub>IFNO+H]<sup>+</sup>: 343.99; found: 344.00.

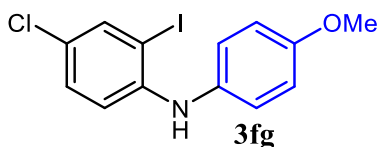

**4-Chloro-2-iodo-*N*-(4-methoxyphenyl)aniline (3fg)**<sup>[1]</sup>: Compound **3fg** was prepared according to the general procedure from 4-chloro-2-iodoaniline **1f** (253 mg, 1 mmol) and 4-methoxyphenylboronic acid **2g** (228 mg, 1.5 mmol), and purified by column chromatography on silica gel, eluting with hexane/ethyl acetate (95:5). Colorless gel (131 mg, 73%); <sup>1</sup>H NMR (500 MHz, CDCl<sub>3</sub>):  $\delta$  = 7.67 (d,  $J$  = 2.5 Hz, 1H, Ar-H), 7.08-7.06 (m, 3H, Ar-H), 6.89-6.87 (m, 2H, Ar-H), 6.75 (d,  $J$  = 9.0 Hz, 1H, Ar-H), 5.73 (brs, 1H, N-H), 3.80 (s, 3H, CH<sub>3</sub>) ppm; <sup>13</sup>C NMR (125 MHz, CDCl<sub>3</sub>):  $\delta$  = 156.67 (C), 144.72 (C), 138.12 (CH), 134.12 (C), 129.00 (CH), 124.79 (2CH), 123.68 (C), 114.88 (2CH), 113.98 (CH), 85.80 (C), 55.55 (CH<sub>3</sub>) ppm; IR (ATR):  $\tilde{\nu}$  = 3369 (N-H), 2930, 1583, 1510, 1313, 1266, 1028, 863, 841 cm<sup>-1</sup>; LCMS:  $m/z$  calcd. for [C<sub>13</sub>H<sub>11</sub>ClINO+H]<sup>+</sup>: 359.96; found: 360.00.

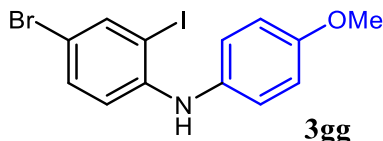

**4-Bromo-2-iodo-N-(4-methoxyphenyl)aniline (3gg)**<sup>[1]</sup>: Compound **3gg** was prepared according to the general procedure from 4-bromo-2-iodoaniline **1g** (298 mg, 1 mmol) and 4-methoxyphenylboronic acid **2g** (228 mg, 1.5 mmol); and purified by column chromatography on silica gel, eluting with hexane/ethyl acetate (95:5). White solid (290 mg, 72%); m.p.: 84-86 °C. <sup>1</sup>H NMR (500 MHz, CDCl<sub>3</sub>):  $\delta$  = 7.79 (d,  $J$  = 2.4 Hz, 1H, Ar-H), 7.18 (dd,  $J$  = 8.7, 2.2 Hz, 1H, Ar-H), 7.07 (dt,  $J$  = 6.6, 2.2 Hz, 2H, Ar-H), 6.88 (dt,  $J$  = 6.6, 2.3 Hz, 2H, Ar-H), 6.68 (d,  $J$  = 8.8 Hz, 1H, Ar-H), 5.74 (brs, 1H, N-H), 3.79 (s, 3H, CH<sub>3</sub>) ppm; <sup>13</sup>C NMR (125 MHz, CDCl<sub>3</sub>):  $\delta$  = 156.98 (C), 145.37 (C), 140.91 (CH), 134.17 (C), 132.06 (CH), 125.30 (2CH), 115.11 (2CH), 114.67 (CH), 110.67 (C), 86.47 (C), 55.77 (CH<sub>3</sub>) ppm; IR (ATR):  $\tilde{\nu}$  = 3364 (N-H), 2929, 2834, 1576, 1506, 1379, 1238, 1165, 1104, 1028, 862, 813 cm<sup>-1</sup>; LCMS:  $m/z$  calcd. for [C<sub>13</sub>H<sub>11</sub>BrINO+H]<sup>+</sup>: 403.91; found: 404.00.

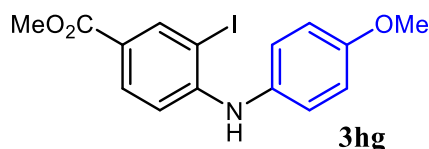

**Methyl 3-iodo-4-((4-methoxyphenyl)amino)benzoate (3hg)**<sup>[1]</sup>: Compound **3hg** was prepared from methyl 4-amino-3-iodobenzoate **1h** (277 mg, 1.0 mmol) and 4-methoxyphenylboronic acid **2g** (228 mg, 1.5 mmol), and purified by column chromatography on silica gel, eluting with hexane/ethyl acetate (95:5). Orange gel (268 mg, 70% yield). <sup>1</sup>H NMR (500 MHz, CDCl<sub>3</sub>):  $\delta$  = 8.40 (d,  $J$  = 2.0 Hz, 1H, Ar-H), 7.77 (dd,  $J$  = 9.0, 2.5 Hz, 1H, Ar-H), 7.15 (dt,  $J$  = 6.5, 2.5 Hz, 2H Ar-H), 6.93 (dt,  $J$  = 6.5, 2.5 Hz, 2H, Ar-H), 6.74 (d,  $J$  = 9.0 Hz, 1H, Ar-H), 6.20 (brs, 1H, N-H), 3.85 (s, 3H, CH<sub>3</sub>), 3.83 (s, 3H, CH<sub>3</sub>) ppm; <sup>13</sup>C NMR (125 MHz, CDCl<sub>3</sub>):  $\delta$  = 165.81 (C=O), 157.49 (C), 149.63 (C), 141.18 (CH), 132.68 (C), 131.03 (CH), 126.16 (2CH), 121.28 (C), 114.96 (2CH), 111.29 (CH), 84.09 (C), 55.56 (CH<sub>3</sub>), 51.84 (CH<sub>3</sub>) ppm; IR (ATR):  $\tilde{\nu}$  = 3374 (N-H), 2923, 2853, 1707 (C=O), 1592, 1509, 1434, 1267, 1251, 1112, 1035, 829, 763 cm<sup>-1</sup>; LCMS:  $m/z$  calcd. for [C<sub>15</sub>H<sub>14</sub>INO<sub>3</sub>+H]<sup>+</sup>: 384.00; found: 384.10.

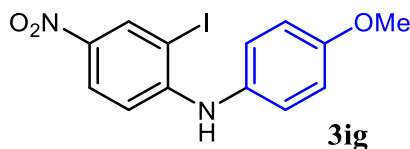

**4-Nitro-2-iodo-N-(4-methoxyphenyl)aniline (3ig)**<sup>[1]</sup>: Compound **3ig** was prepared according to the general procedure from 2-iodo-4-nitroaniline **1i** (264 mg, 1 mmol) and 4-methoxyphenylboronic acid **2g** (228 mg, 0.75 mmol), and purified by column chromatography on silica gel, eluting with hexane/ethyl acetate (95:5). Yellow solid (215 mg, 58%); mp: 100-102 °C. <sup>1</sup>H NMR (500 MHz, CDCl<sub>3</sub>):  $\delta$  = 8.61 (dd,  $J$  = 2.5, 0.5 Hz, 1H, Ar-H), 7.99 (dd,  $J$  = 6.5, 2.5 Hz, 1H, Ar-H), 7.15 (dt,  $J$  = 7.0, 2.0 Hz, 2H, Ar-H), 6.94 (dt,  $J$  = 7.0, 2.5 Hz, 2H, Ar-H), 6.66 (d,  $J$  = 9.0 Hz, 1H, Ar-H), 6.44 (brs, 1H, N-H), 3.82 (s, 3H, CH<sub>3</sub>) ppm; <sup>13</sup>C NMR (125 MHz, CDCl<sub>3</sub>):  $\delta$  = 158.23 (C), 151.35 (C), 139.26 (C), 135.61 (CH), 131.51 (C), 126.82 (2CH), 125.64 (CH), 115.19 (2CH), 110.34 (CH), 82.46 (C), 55.58 (CH<sub>3</sub>) ppm;

IR (ATR):  $\tilde{\nu}$  = 3332 (N–H), 2927, 1588, 1573, 1507, 1490 (N–O), 1314, 1284, 1256, 1167, 1020, 834  $\text{cm}^{-1}$ ; LCMS:  $m/z$  calcd. for  $[\text{C}_{13}\text{H}_{11}\text{IN}_2\text{O}_3+\text{H}]^+$ : 370.98; found: 371.00.

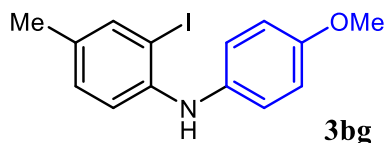

**2-Iodo-N-(4-methoxyphenyl)-4-methylaniline (3bg):** Compound **3bg** was prepared according to the general procedure from 4-methyl-2-iodoaniline **1b** (233 mg, 1 mmol) and 4-methoxyphenylboronic acid **2g** (228 mg, 1.5 mmol), and purified by column chromatography on silica gel, eluting with hexane/ethyl acetate (98:2). Colourless gel (264 mg, 78%).  $^1\text{H}$  NMR (500 MHz,  $\text{CDCl}_3$ ):  $\delta$  = 7.56 (d,  $J$  = 1.8 Hz, 1H, Ar–H), 7.08–7.05 (m, 2H, Ar–H), 6.95 (dd,  $J$  = 8.2, 2.0 Hz, 1H, Ar–H), 6.88 (t,  $J$  = 5.6 Hz, 1H, Ar–H), 6.86 (t,  $J$  = 5.8 Hz, 1H, Ar–H), 6.82 (d,  $J$  = 8.3 Hz, 1H, Ar–H), 5.63 (brs, 1H, N–H), 3.80 (s, 3H,  $\text{OCH}_3$ ), 2.22 (s, 3H,  $\text{CH}_3$ ) ppm;  $^{13}\text{C}$  NMR (125 MHz,  $\text{CDCl}_3$ ):  $\delta$  = 155.84 (C), 143.13 (C), 139.48 (CH), 135.26 (C), 130.46 (C), 129.74 (CH), 123.52 (2CH), 114.69 (2CH), 114.35 (CH), 87.28 (C), 55.56 ( $\text{OCH}_3$ ), 19.94 ( $\text{CH}_3$ ) ppm; IR (ATR):  $\tilde{\nu}$  = 3362 (N–H), 2945, 1735, 1600, 1573, 1510, 1460, 1340, 1296, 1217, 1143, 1092, 1030, 996, 881, 820, 767  $\text{cm}^{-1}$ ; LCMS:  $m/z$  calcd. for  $[\text{C}_{14}\text{H}_{14}\text{INO}+\text{H}]^+$ : 340.01; found: 340.10.

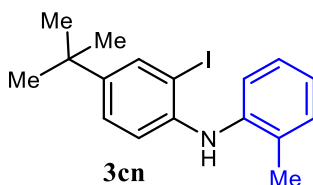

**4-(tert-Butyl)-2-iodo-N-(o-tolyl)aniline (3cn):** Compound **3cn** was prepared according to the general procedure from 4-(tert-butyl)-2-iodoaniline **1c** (275 mg, 1 mmol) and *o*-tolylboronic acid **2n** (205 mg, 1.5 mmol), and purified by column chromatography on silica gel, eluting with hexane/ethyl acetate (98:2). Brown gel (186 mg, 51%).  $^1\text{H}$  NMR (500 MHz,  $\text{CDCl}_3$ ):  $\delta$  = 7.75 (d,  $J$  = 2.5 Hz, 1H, Ar–H), 7.25–7.17 (m, 4H, Ar–H), 7.10–6.96 (m, 1H, Ar–H), 6.89 (d,  $J$  = 8.5 Hz, 1H, Ar–H), 5.60 (brs, 1H, N–H), 2.27 (s, 3H, Ar– $\text{CH}_3$ ), 1.28 (s, 9H,  $\text{C}(\text{CH}_3)_3$ ) ppm;  $^{13}\text{C}$  NMR (125 MHz,  $\text{CDCl}_3$ ):  $\delta$  = 144.75 (C), 141.77 (C), 140.64 (C), 136.13 (CH), 131.07 (CH), 129.54 (C), 126.76 (CH), 126.15 (CH), 122.82 (CH), 120.11 (CH), 115.49 (CH), 88.84 (C), 34.01 (C of  $\text{C}(\text{CH}_3)_3$ ), 31.36 ( $\text{C}(\text{CH}_3)_3$ ), 17.92 (Ar– $\text{CH}_3$ ) ppm; IR (ATR):  $\tilde{\nu}$  = 3362 (N–H), 2945, 1730, 1600, 1575, 1515, 1471, 1345, 1287, 1215, 1140, 1050, 880, 775  $\text{cm}^{-1}$ ; LCMS:  $m/z$  calcd. for  $[\text{C}_{17}\text{H}_{20}\text{IN}+\text{H}]^+$ : 366.06; found: 366.10.

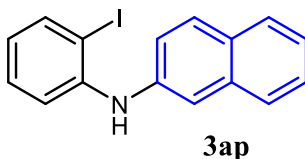

**N-(2-iodophenyl)naphthalen-2-amine (3ap):** Compound **3ap** was prepared according to the general procedure from 2-iodoaniline **1a** (219 mg, 1 mmol) and naphthalen-2-ylboronic acid **2p** (258 mg, 1.5 mmol); and purified by column chromatography on silica gel, eluting with hexane/ethyl acetate (98:2). Brown gel (176 mg, 51%).  $^1\text{H}$  NMR (500 MHz,  $\text{CDCl}_3$ ):  $\delta$  = 7.82–7.75 (m, 3H, Ar–H), 7.68 (d,  $J$  = 8.0 Hz, 1H, Ar–H), 7.48 (brs, 1H, N–H), 7.45–7.32 (m, 3H,

Ar-H), 7.29-7.26 (m, 2H, Ar-H), 7.22-7.20 (m, 1H, Ar-H), 6.65 (t,  $J = 8.0$  Hz, 1H, Ar-H) ppm;  $^{13}\text{C}$  NMR (125 MHz,  $\text{CDCl}_3$ ):  $\delta = 143.76$  (C), 139.66 (C), 139.57 (CH), 134.42 (C), 129.87 (C), 129.30 (CH), 129.09 (CH), 127.68 (CH), 126.71 (CH), 126.52 (CH), 124.16 (CH), 122.30 (CH), 121.10 (CH), 116.36 (CH), 114.61 (CH), 89.17 (C) ppm; IR (ATR):  $\tilde{\nu} = 3360$  (N-H), 2950, 1732, 1573, 1515, 1468, 1298, 1210, 1095, 980, 730  $\text{cm}^{-1}$ ; LCMS:  $m/z$  calculated for  $\text{C}_{16}\text{H}_{12}\text{IN-H}^+$ : 346.00, found: 346.00.

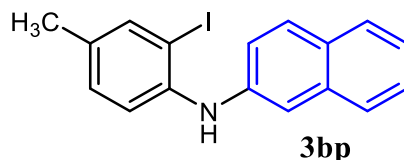

***N*-(2-iodo-4-methylphenyl)naphthalen-2-amine (3bp):** Compound **3bp** was prepared according to the general procedure from 4- methyl-2-iodoaniline **1b** (233 mg, 1 mmol) and naphthalen-2-ylboronic acid **2p** (258 mg, 1.5 mmol); and purified by column chromatography on silica gel, eluting with hexane/ethyl acetate (98:2). Brown gel (187 mg, 52%).  $^1\text{H}$  NMR (400 MHz,  $\text{CDCl}_3$ ):  $\delta = 7.87$ -7.63 (m, 4H, Ar-H), 7.45-7.21 (m, 5H, Ar-H), 7.04 (d,  $J = 8.1$  Hz, 1H, Ar-H), 5.90 (brs, 1H, N-H), 2.27 (s, 3H, Ar-CH<sub>3</sub>) ppm;  $^{13}\text{C}$  NMR (125 MHz,  $\text{CDCl}_3$ ):  $\delta = 141.08$  (C), 140.52 (C), 139.76 (CH), 134.51 (C), 132.71 (C), 129.82 (CH), 129.48 (C), 129.24 (CH), 127.65 (CH), 126.55 (CH), 126.47 (CH), 123.78 (CH), 120.44 (CH), 117.62 (CH), 112.87 (CH), 90.37 (C), 20.14 (CH<sub>3</sub>) ppm; IR (ATR):  $\tilde{\nu} = 3362$  (N-H), 2945, 1735, 1600, 1573, 1510, 1460, 1340, 1296, 1209, 1143, 1092, 902, 739  $\text{cm}^{-1}$ ; LCMS:  $m/z$  calculated for  $\text{C}_{17}\text{H}_{14}\text{IN-H}^+$ : 360.02, found: 360.10.

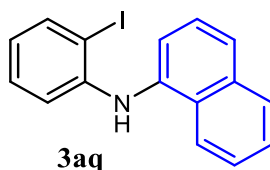

***N*-(2-iodophenyl)naphthalen-1-amine (3aq):** Compound **3aq** was prepared according to the general procedure from 2-iodoaniline **1a** (219 mg, 1 mmol) and naphthalen-1-ylboronic acid **2q** (258 mg, 1.5 mmol); and purified by column chromatography on silica gel, eluting with hexane/ethyl acetate (98:2). Brown gel (179 mg, 52%).  $^1\text{H}$  NMR (400 MHz,  $\text{CDCl}_3$ ):  $\delta = 7.99$  (d,  $J = 7.2$  Hz, 1H, Ar-H), 7.90-7.87 (m, 1H, Ar-H), 7.78 (d,  $J = 7.6$  Hz, 1H, Ar-H), 7.68-7.61 (m, 1H, Ar-H), 7.56-7.32 (m, 4H, Ar-H), 7.09 (t,  $J = 8.0$  Hz, 1H, Ar-H), 6.78 (d,  $J = 8.0$  Hz, 1H, Ar-H), 6.55 (t,  $J = 7.2$  Hz, 1H, Ar-H), 6.21 (brs, 1H, N-H) ppm; IR (ATR):  $\tilde{\nu} = 3362$  (N-H), 2945, 1735, 1600, 1573, 1510, 1460, 1340, 1296, 1217, 1143, 1030, 996, 881, 767  $\text{cm}^{-1}$ ; LCMS:  $m/z$  calculated for  $[\text{C}_{16}\text{H}_{12}\text{IN-H}]^+$ : 346.00, found: 346.10.

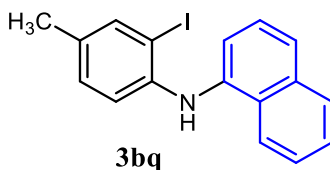

***N*-(2-iodo-4-methylphenyl)naphthalen-1-amine (3bq):** Compound **3bq** was prepared according to the general procedure from 4- methyl-2-iodoaniline **1b** (233 mg, 1 mmol) and naphthalen-1-ylboronic acid **2q** (258 mg, 1.5 mmol); and purified by column chromatography on silica gel, eluting with hexane/ethyl acetate (98:2). Brown gel

(194 mg, 54%).  $^1\text{H}$  NMR (400 MHz,  $\text{CDCl}_3$ ):  $\delta$  = 8.30 (d,  $J$  = 8.0 Hz, 1H, Ar-H), 7.98 (d,  $J$  = 7.4 Hz, 1H, Ar-H), 7.93-7.91 (m, 1H, Ar-H), 7.85-7.80 (m, 1H, Ar-H), 7.56-7.38 (m, 4H, Ar-H), 7.30-7.27 (m, 1H, Ar-H), 6.98-6.92 (m, 1H, Ar-H), 6.76 (d,  $J$  = 8.0 Hz, 1H, Ar-H), 6.20 (brs, 1H, N-H) ppm, 2.24 (s, 3H, -CH<sub>3</sub>) ppm; IR (ATR):  $\tilde{\nu}$  = 3362, 2945, 1735, 1600, 1573, 1510, 1460, 1340, 1296, 1210, 1140, 1040, 880, 740  $\text{cm}^{-1}$ ; LCMS:  $m/z$  calculated for  $[\text{C}_{17}\text{H}_{14}\text{IN}+\text{H}]^+$ : 360.02, found: 360.10.

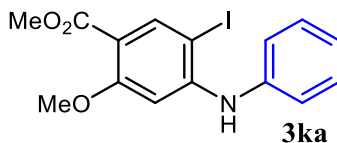

**Methyl 5-iodo-2-methoxy-4-(phenylamino)benzoate (3ka)**<sup>[1]</sup>: Compound **3ka** was prepared according to the general procedure from methyl 4-amino-5-iodo-2-methoxybenzoate **1k** (307 mg, 1 mmol) and phenylboronic acid **2a** (183 mg, 1.5 mmol); and purified by column chromatography on silica gel, eluting with hexane/ethyl acetate (90:10). Off-white solid (249 mg, 65%); m.p.: 138-140 °C.  $^1\text{H}$  NMR (500 MHz,  $\text{CDCl}_3$ ):  $\delta$  = 8.25 (s, 1H, Ar-H), 7.35 (tt,  $J$  = 8.0, 2.0 Hz, 2H; Ar-H), 7.21 (d,  $J$  = 8.5 Hz, 2H, Ar-H), 7.12 (tt,  $J$  = 7.5, 1.5 Hz, 1H, Ar-H), 6.63 (s, 1H, Ar-H), 6.23 (brs, 1H, N-H), 3.82 (s, 3H, CH<sub>3</sub>), 3.68 (s, 3H, CH<sub>3</sub>) ppm;  $^{13}\text{C}$  NMR (125 MHz,  $\text{CDCl}_3$ ):  $\delta$  = 164.77 (C=O), 161.56 (C), 148.93 (C), 142.91 (CH), 140.12 (C), 137.16 (C), 129.76 (2CH), 124.65 (CH), 122.46 (2CH), 112.18 (CH), 96.85 (C), 55.98 (CH<sub>3</sub>), 51.71 (CH<sub>3</sub>) ppm; IR (ATR):  $\tilde{\nu}$  = 3335 (N-H), 2954, 1694 (C=O), 1579, 1553, 1495, 1459, 1426, 1391, 1325, 1172, 1076, 826, 772  $\text{cm}^{-1}$ ; LCMS:  $m/z$  calcd. for  $[\text{C}_{15}\text{H}_{14}\text{INO}_3+\text{H}]^+$ : 384.00; found: 384.10.

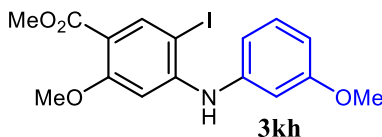

**Methyl 5-iodo-2-methoxy-4-((3-methoxyphenyl)amino)benzoate (3kh)**<sup>[1]</sup>: Compound **3kh** was prepared according to the general procedure from methyl 4-amino-5-iodo-2-methoxybenzoate **1k** (307 mg, 1 mmol) and 3-methoxyphenylboronic acid **2h** (228 mg, 1.5 mmol); and purified by column chromatography on silica gel, eluting with hexane/ethyl acetate (90:10). Red gel (285 mg, 69%);  $^1\text{H}$  NMR (500 MHz,  $\text{CDCl}_3$ ):  $\delta$  = 8.25 (s, 1H, Ar-H), 7.25 (t,  $J$  = 8.2 Hz, 1H, Ar-H), 6.78 (dd,  $J$  = 8.0, 1.5 Hz, 1H, Ar-H), 6.75 (t,  $J$  = 2.2 Hz, 1H, Ar-H), 6.70 (s, 1H, Ar-H), 6.69 (ddd,  $J$  = 7.5, 2.0, 0.7 Hz, 1H, Ar-H), 6.22 (brs, 1H, N-H), 3.82 (s, 3H, CH<sub>3</sub>), 3.78 (s, 3H, CH<sub>3</sub>), 3.73 (s, 3H, CH<sub>3</sub>) ppm;  $^{13}\text{C}$  NMR (125 MHz,  $\text{CDCl}_3$ ):  $\delta$  = 165.06 (C=O), 161.72 (C), 161.06 (C), 157.12 (C), 148.91 (C), 143.09 (C), 130.66 (CH), 114.58 (CH), 110.35 (CH), 108.02 (CH), 106.54 (CH), 101.76 (CH), 97.51 (C), 55.21 (CH<sub>3</sub>), 55.58 (CH<sub>3</sub>), 51.97 (CH<sub>3</sub>) ppm; IR (ATR):  $\tilde{\nu}$  = 3365 (N-H), 2947, 1714, 1696 (C=O), 1582, 1491, 1433, 1392, 1236, 1218, 1156, 1093, 1042, 956, 779  $\text{cm}^{-1}$ ; LCMS:  $m/z$  calcd. for  $[\text{C}_{16}\text{H}_{16}\text{INO}_4+\text{H}]^+$ : 414.01; found: 414.20.

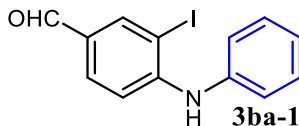



**4-((2-Iodophenyl)amino)benzaldehyde (3ba-1):** 2,3-Dichloro-5,6-dicyano-1,4-benzoquinone (DDQ, 1021 mg, 3 equiv.) was added to the solution of compound **3ba** (464 mg, 1.5 mmol) in a mixture of MeOH/THF/H<sub>2</sub>O (16:6:1 by volume), and the reaction mixture was stirred for 1 h at room temperature. Then volatiles were evaporated and the residue was dissolved in ethyl acetate (5 ml). The reaction mixture was diluted with water (15 ml) and extracted with ethyl acetate (15 ml  $\times$  2). Then combined organic layer was washed with water (15 ml) followed by brine solution (15 ml), and dried over anhydrous Na<sub>2</sub>SO<sub>4</sub>. After removal of the volatiles under reduced pressure, the residue was purified by column chromatography on silica gel using hexane/ethyl acetate mixtures (95:5) as the eluent to yield 4-((2-iodophenyl)amino)benzaldehyde (**3ba-1**, 271 mg, 81%) as an off-white solid. <sup>1</sup>H NMR (500 MHz, CDCl<sub>3</sub>):  $\delta$  = 9.83 (s, 1H, CHO), 7.86 (dd,  $J$  = 8.0, 1.5 Hz, 1H, Ar-H), 7.79 (d,  $J$  = 9.0, 2H, Ar-H), 7.42 (dd,  $J$  = 8.0, 1.0 Hz, 1H, Ar-H), 7.33 (td,  $J$  = 8.0, 1.0 Hz, 1H, Ar-H), 7.07 (d,  $J$  = 8.5 Hz, 2H, Ar-H), 6.83 (td,  $J$  = 8.0, 1.5 Hz, 1H, Ar-H), 6.16 (brs, 1H, N-H) ppm; <sup>13</sup>C NMR (125 MHz, CDCl<sub>3</sub>):  $\delta$  = 190.42 (C=O), 148.70 (C), 141.10 (C), 139.88 (CH), 132.05 (2CH), 129.46 (C), 129.25 (CH), 125.27 (CH), 120.82 (CH), 115.56 (2CH), 92.82 (C) ppm; IR (ATR):  $\tilde{\nu}$  = 3318 (N-H), 2742, 1663 (C=O), 1599, 1571, 1521, 1460, 1416, 1320, 1292, 1221, 1158, 1010, 815, 748, 712 cm<sup>-1</sup>; LCMS:  $m/z$  calculated for [C<sub>13</sub>H<sub>10</sub>INO+H]<sup>+</sup>: 323.98, found: 324.20.

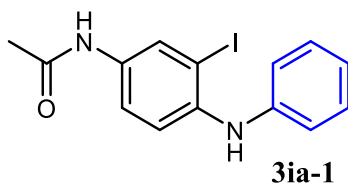

**N-(3-iodo-4-(phenylamino)phenyl)acetamide (3ia-1):** To a solution of compound **3ai** (510 mg, 1.5 mmol) in glacial acetic acid (5 ml), Fe dust (419 mg, 5 equiv.) was added at room temperature. Then the reaction mixture was refluxed for 3 h. After cooling to room temperature the reaction mixture was neutralized with saturated NaHCO<sub>3</sub> (aq.) under cold condition. Then product was extracted with ethyl acetate (25 ml  $\times$  2). The combined organic layer was washed with water (50 ml  $\times$  2) followed by brine solution (50 ml), and dried over anhydrous Na<sub>2</sub>SO<sub>4</sub>. After removal of the volatiles under reduced pressure, the residue of the crude product was purified by column chromatography on silica gel using hexane/ethyl acetate mixtures (90:10) as the eluent to yield *N*-(3-iodo-4-(phenylamino)phenyl)acetamide (**3ai-1**, 412 mg, 78%) as a grey solid. <sup>1</sup>H NMR (400 MHz, DMSO-D<sub>6</sub>):  $\delta$  = 9.94 (brs, 1H, Ar-N-H(COCH<sub>3</sub>), 8.20 (brs, 1H, N-H), 7.45-7.44 (m, 1H, Ar-H), 7.33 (s, 1H, Ar-H), 7.16-7.12 (m, 3H, Ar-H), 6.78-6.73 (m, 3H, Ar-H), 2.02 (s, 3H, COCH<sub>3</sub>) ppm; <sup>1</sup>H NMR (500 MHz, CDCl<sub>3</sub>):  $\delta$  = 7.96 (brs, 1H, Ar-N-H(COCH<sub>3</sub>), 7.32-7.26 (m, 4H, Ar-H), 7.22 (brs, 1H, N-H), 7.15 (d,  $J$  = 9.0 Hz, 1H, Ar-H), 7.05 (d,  $J$  = 7.5 Hz, 2H, Ar-H), 6.99 (t,  $J$  = 7.5 Hz, 1H, Ar-H), 2.15 (s, 3H, COCH<sub>3</sub>) ppm; <sup>13</sup>C NMR (125 MHz, CDCl<sub>3</sub>):  $\delta$  = 168.23 (C), 142.37 (C), 140.66 (C), 131.72 (C), 131.28 (CH), 129.46 (2CH), 122.08 (CH), 121.59 (CH), 119.06 (2CH), 116.50 (CH), 89.06 (C), 24.34 (CH<sub>3</sub>) ppm; IR (ATR):  $\tilde{\nu}$  = 3407 (N-H), 3287, 3244, 3176, 3112, 1651 (C=O), 1596, 1536, 1504, 1468, 1380, 1293, 1265, 1173, 1074, 1030, 862, 807, 751, 696, 599, 548 cm<sup>-1</sup>; LCMS:  $m/z$  calculated for [C<sub>14</sub>H<sub>13</sub>OIN<sub>2</sub>+H]<sup>+</sup>: 353.01, found: 353.20.

**Preparation of 2-iodo-*N*-methyl-*N*-phenylaniline (3aa-1):** To an ice-cold solution of 2-iodo-*N*-phenylaniline **3aa** (295 mg, 1 mmol) in dry DMF (5 ml) in a 25 ml round bottom flask, NaH (80 mg, 2 mmol, 60% dispersion in mineral oil) was added in two portions, and allowed to stir at 0 °C for 5 min. To this mixture, methyl iodide (MeI, 284 mg, 2 mmol) was added at 0 °C, and allowed to stir at room temperature for 8 h. Then cold water (20 ml) was added to the reaction mixture and the organic part was extracted with ethyl acetate (20 ml × 2). The combined ethyl acetate part was washed with brine solution (20 ml), dried over anhydrous Na<sub>2</sub>SO<sub>4</sub> and evaporated under reduced pressure. The crude product was purified through a silica gel (100-200 mesh) column using hexane/ethyl acetate mixtures (99:1) as the eluent to afford the 2-iodo-*N*-methyl-*N*-phenylaniline (**3aa-1**, brown gel, 300 mg, 97%).

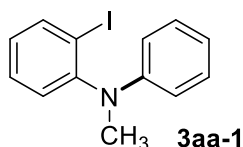

**2-Iodo-*N*-methyl-*N*-phenylaniline (3aa-1)**<sup>[1]</sup>: Compound **3aa-1**, brown gel (300 mg, 97% yield). <sup>1</sup>H NMR (400 MHz, CDCl<sub>3</sub>): δ = 7.88 (dd, *J* = 8.0, 1.2 Hz, 1H, Ar-H), 7.31 (td, *J* = 8.0, 1.6 Hz, 1H, Ar-H), 7.18-7.09 (m, 3H, Ar-H), 6.92 (td, *J* = 8.0, 1.6 Hz, 1H, Ar-H), 6.68 (t, *J* = 7.2 Hz, 1H, Ar-H), 6.47 (dd, *J* = 8.4, 0.8 Hz, 2H, Ar-H), 3.13 (s, 3H, CH<sub>3</sub>) ppm; <sup>13</sup>C NMR (125 MHz, CDCl<sub>3</sub>): δ = 150.78 (C), 148.79 (C), 140.56 (CH), 130.23 (CH), 129.91 (CH), 129.15 (2 CH), 128.33 (CH), 117.91 (CH), 113.69 (CH), 101.36 (C), 39.36 (CH<sub>3</sub>) ppm; LCMS: *m/z* calcd. for [C<sub>13</sub>H<sub>12</sub>IN+H]<sup>+</sup>: 310.00; found: 310.10.

### 3. Optimization of Pd-catalyzed intramolecular aryl C–H activation of 2-iodo-*N*-phenylaniline **3aa** in water to give carbazole **4-1**.

During optimization study, reaction of 2-iodo-*N*-phenylaniline **3aa**, without addition of a cationic surfactant (e.g. CTAB: cetyltrimethylammonium bromide) in water, showed formation of some carbazole **4-1** with a reasonable amount of diphenylamine **5**, probably due to the high concentration of water that enhances both the C–Pd bond protolysis of the in situ generated aryl-palladium species (from **3aa**), and the hydrolysis of DBU (1,8-diazabicyclo[5.4.0]undec-7-ene). Mass spectrum of the aqueous part of the reaction mixture showed the presence of a possible hydrolyzed compound of DBU, that is *N*-(3-aminopropyl)caprolactam, LCMS: *m/z* calculated for [C<sub>9</sub>H<sub>18</sub>N<sub>2</sub>O+H]<sup>+</sup>: 171.14, found: 171.20 (Figure S1a). Thus for further optimization, reactions were attempted with adding a variable amount of CTAB in water. Besides TLC monitoring, <sup>1</sup>H NMR spectra of 2-iodo-*N*-phenylaniline **3aa**, carbazole **4-1**, diphenylamine **5**, and the reaction mixture of **3aa** were collected to monitor the reactions. Few of the <sup>1</sup>H NMR spectra are given here (Figure S1b-e).

(a) Mass (LCMS) spectrum of DBU hydrolyzed compound.

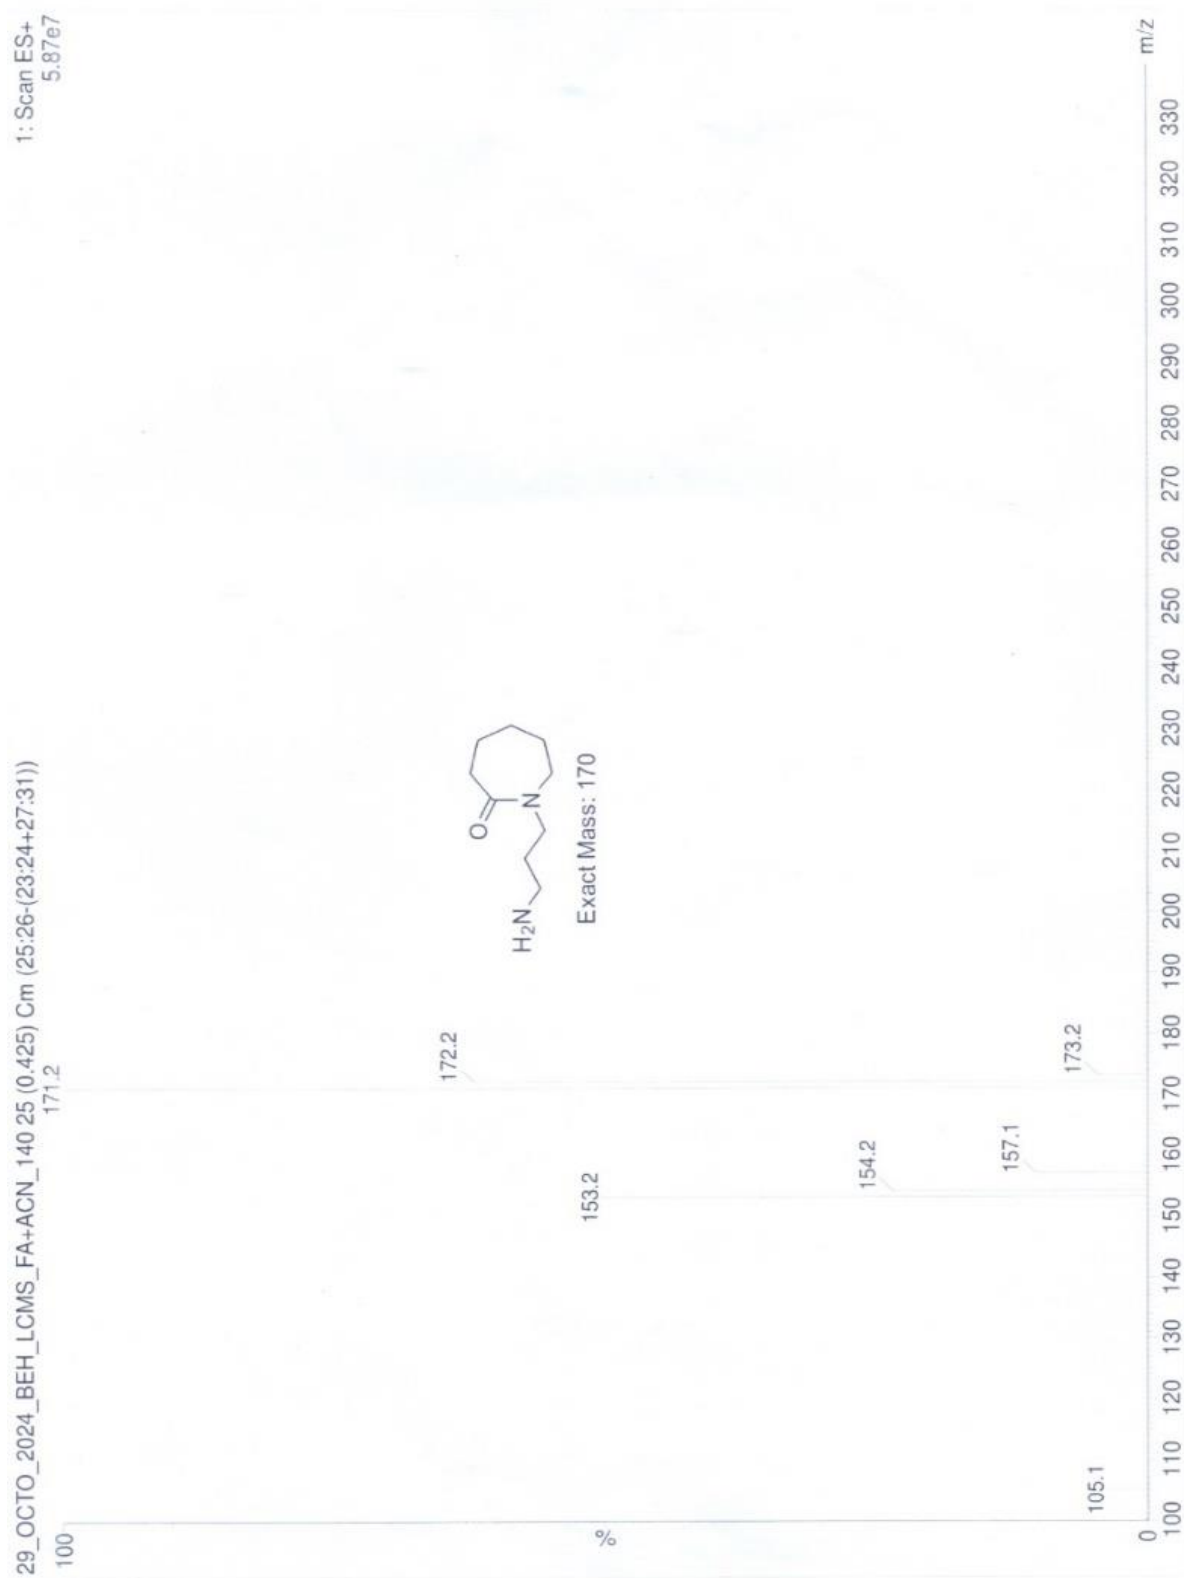

(b)  $^1\text{H}$  NMR spectrum of 2-iodo-*N*-phenylaniline **3aa** in  $\text{DMSO-}d_6$ .

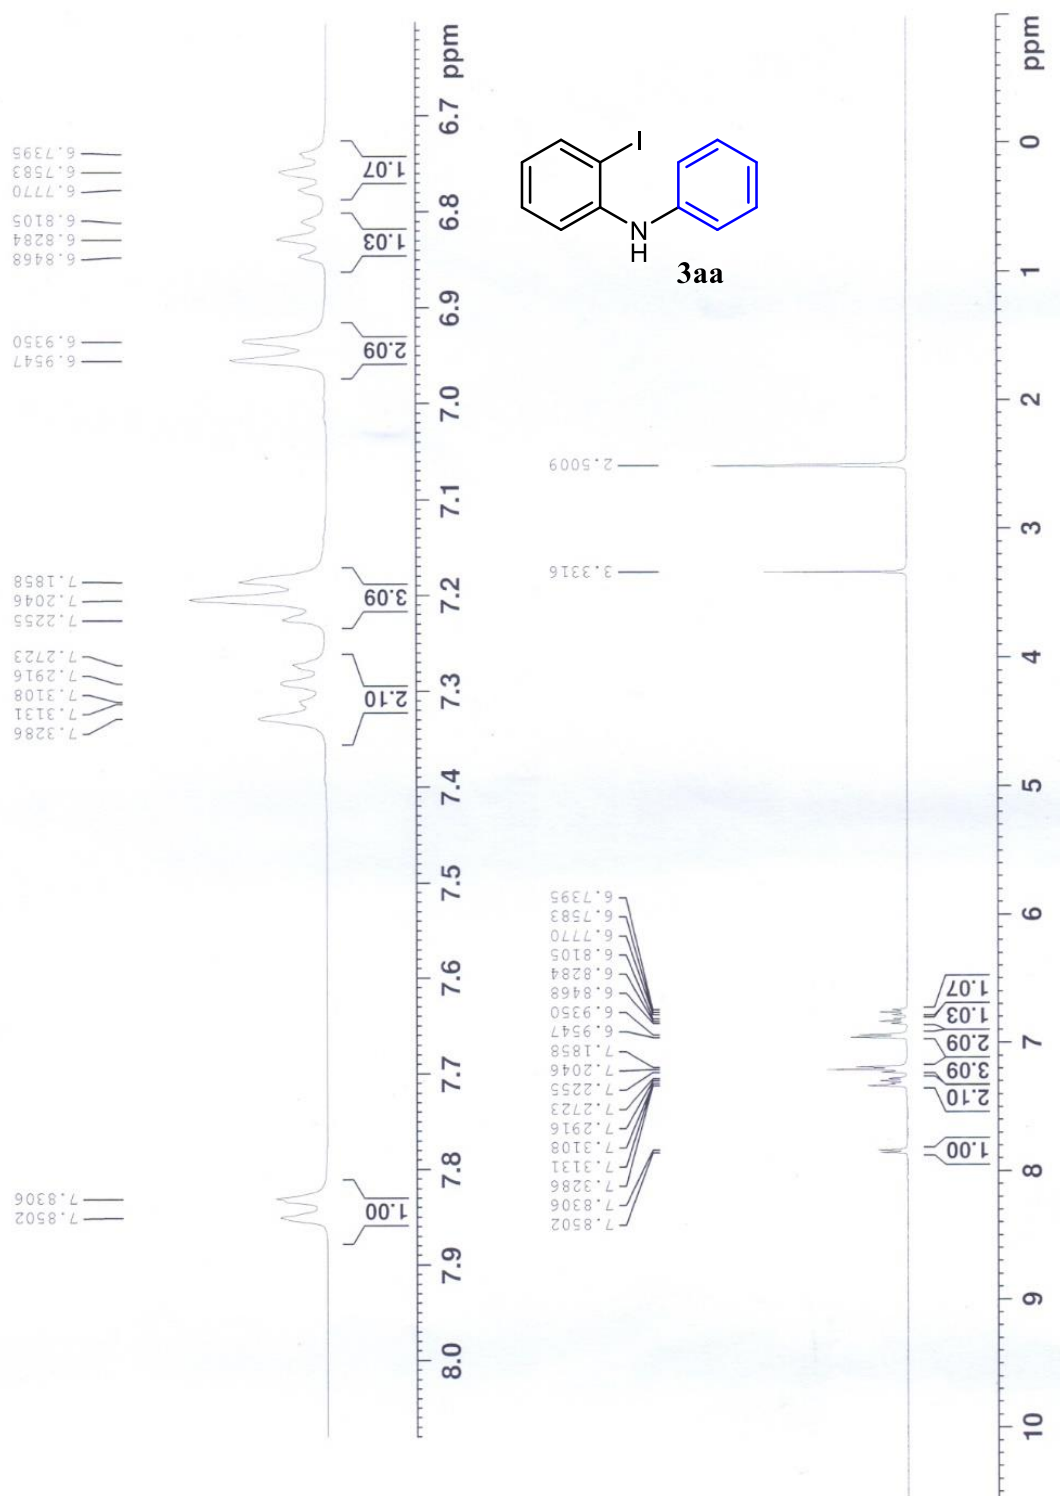

(c)  $^1\text{H}$  NMR spectrum of carbazole **4-1** in  $\text{DMSO}-d_6$ .

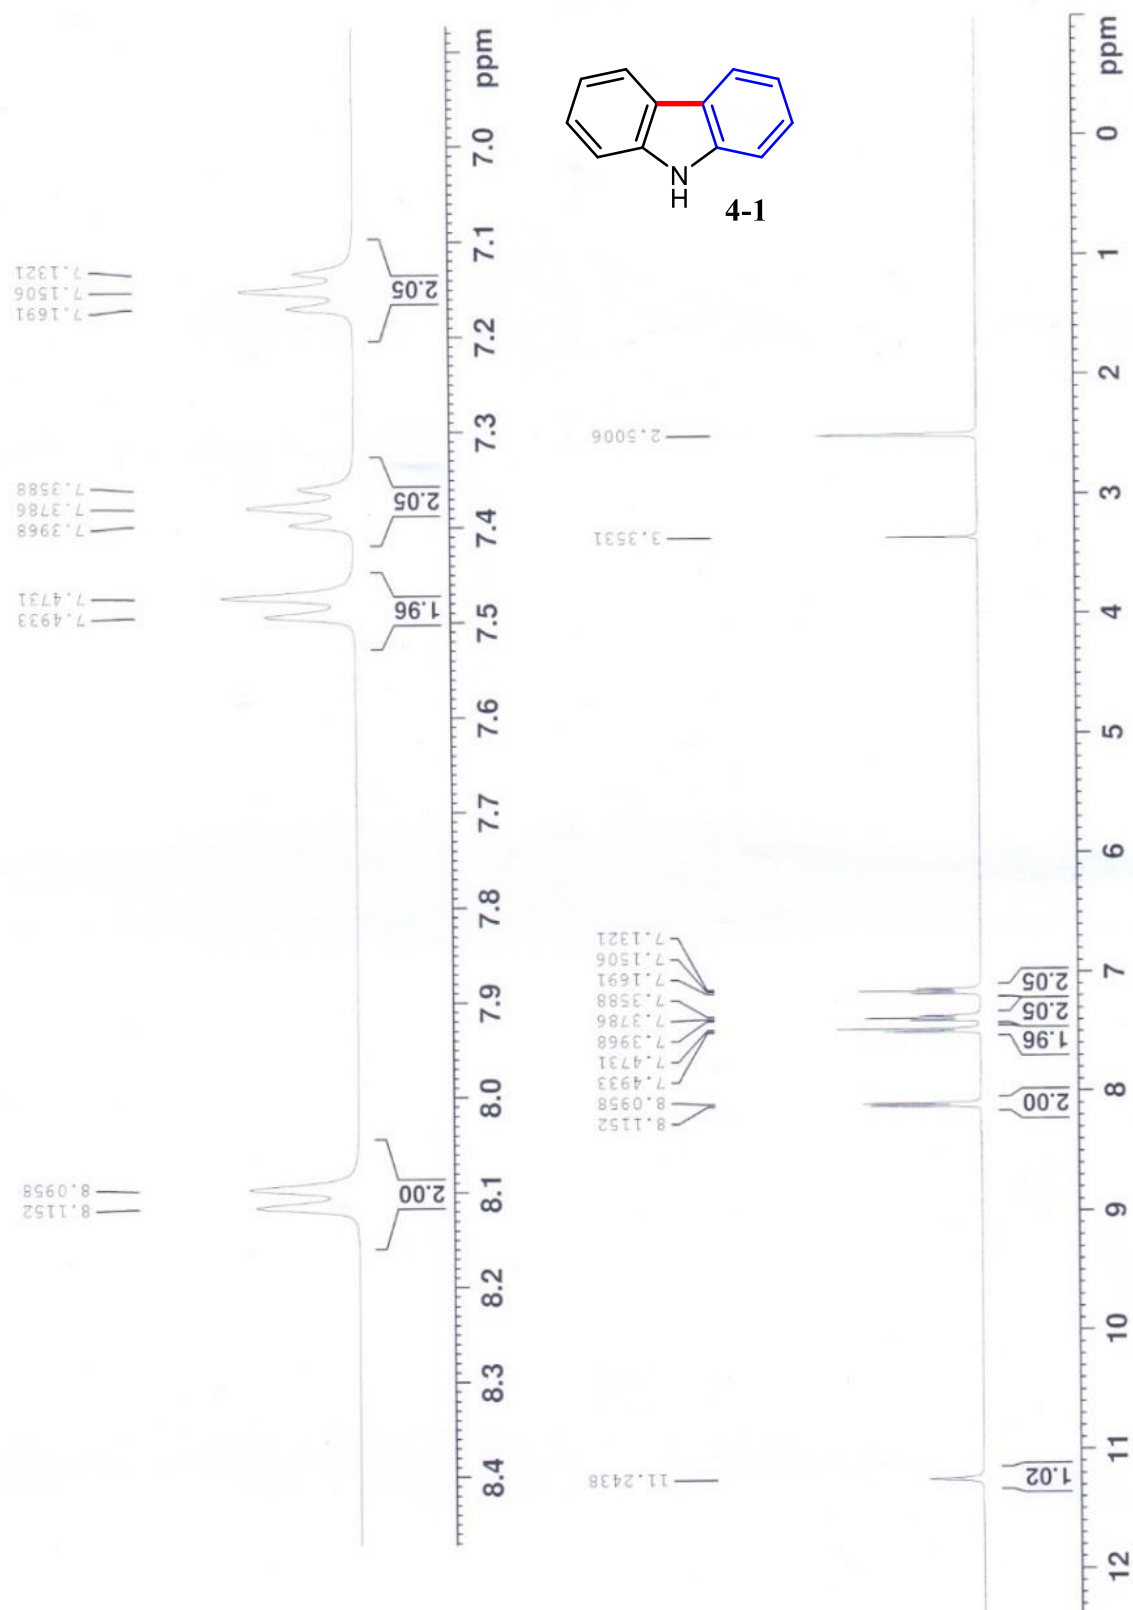

(d)  $^1\text{H}$  NMR spectrum of diphenylamine **5** in  $\text{DMSO}-\text{D}_6$ .

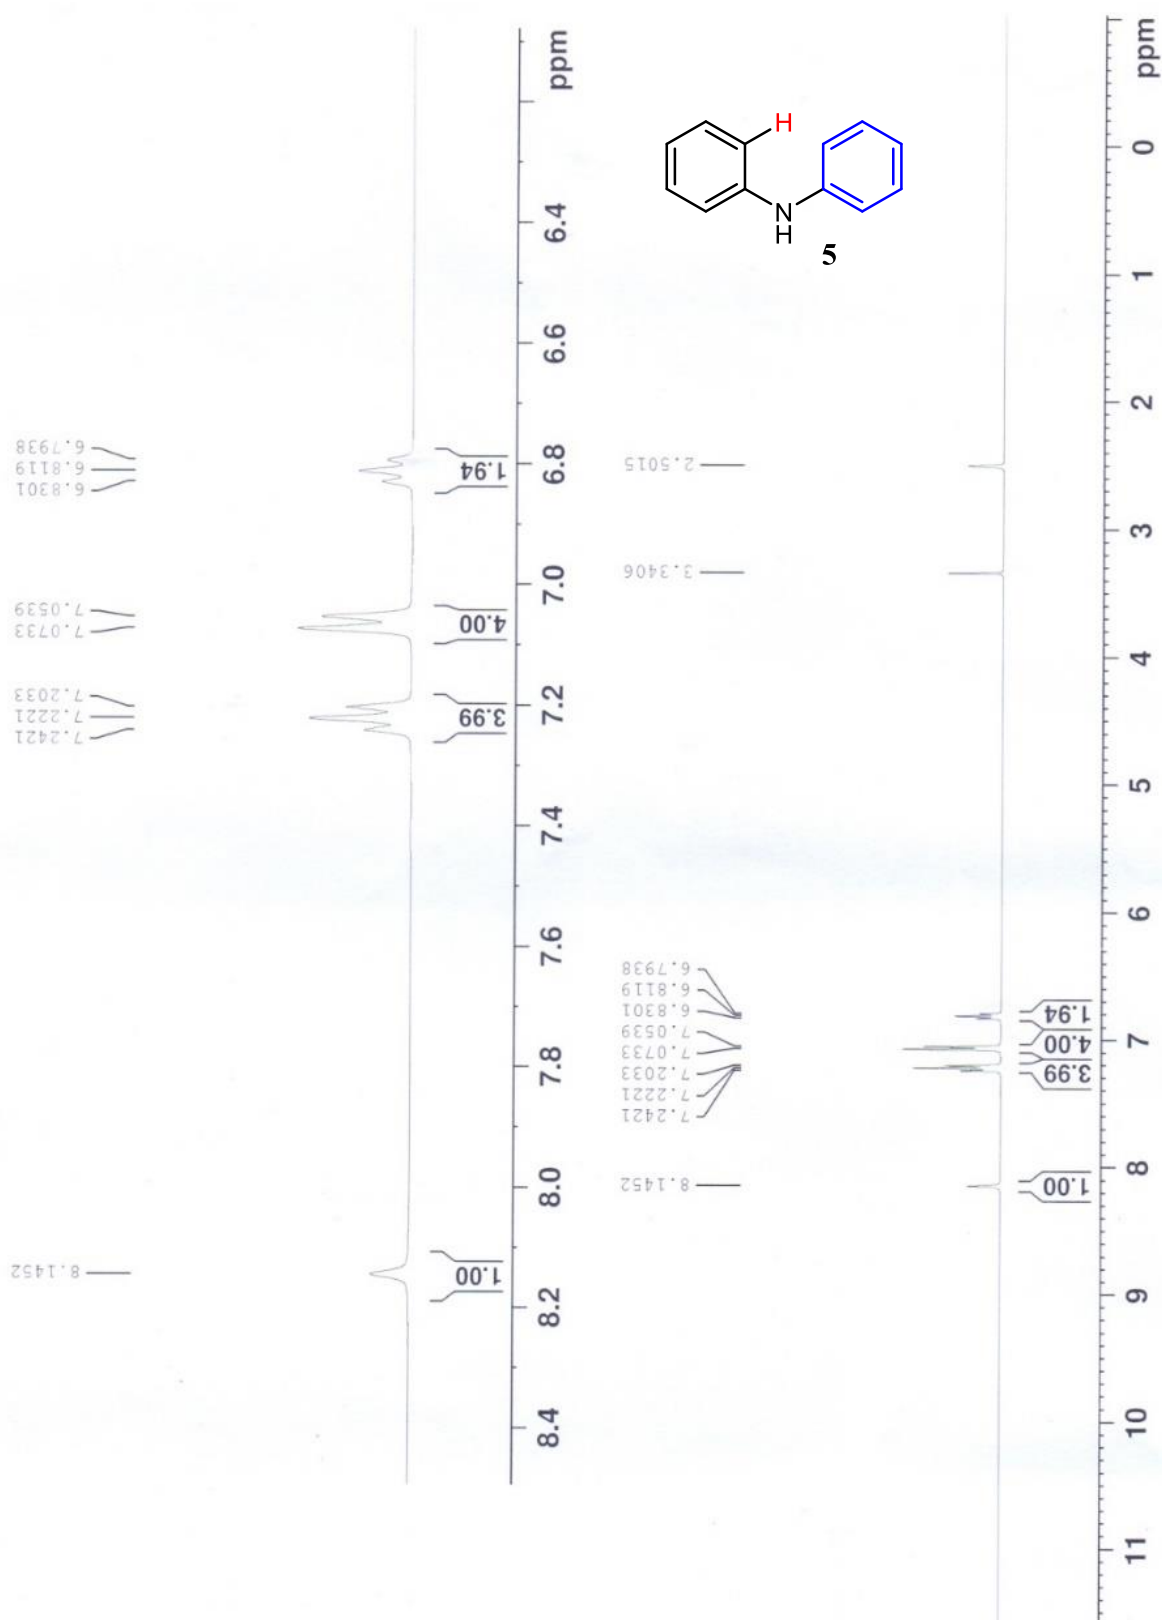

(e)  $^1\text{H}$  NMR spectrum of reaction mixture of **3aa** using 0.02 equiv. CTAB in  $\text{DMSO-}D_6$ .

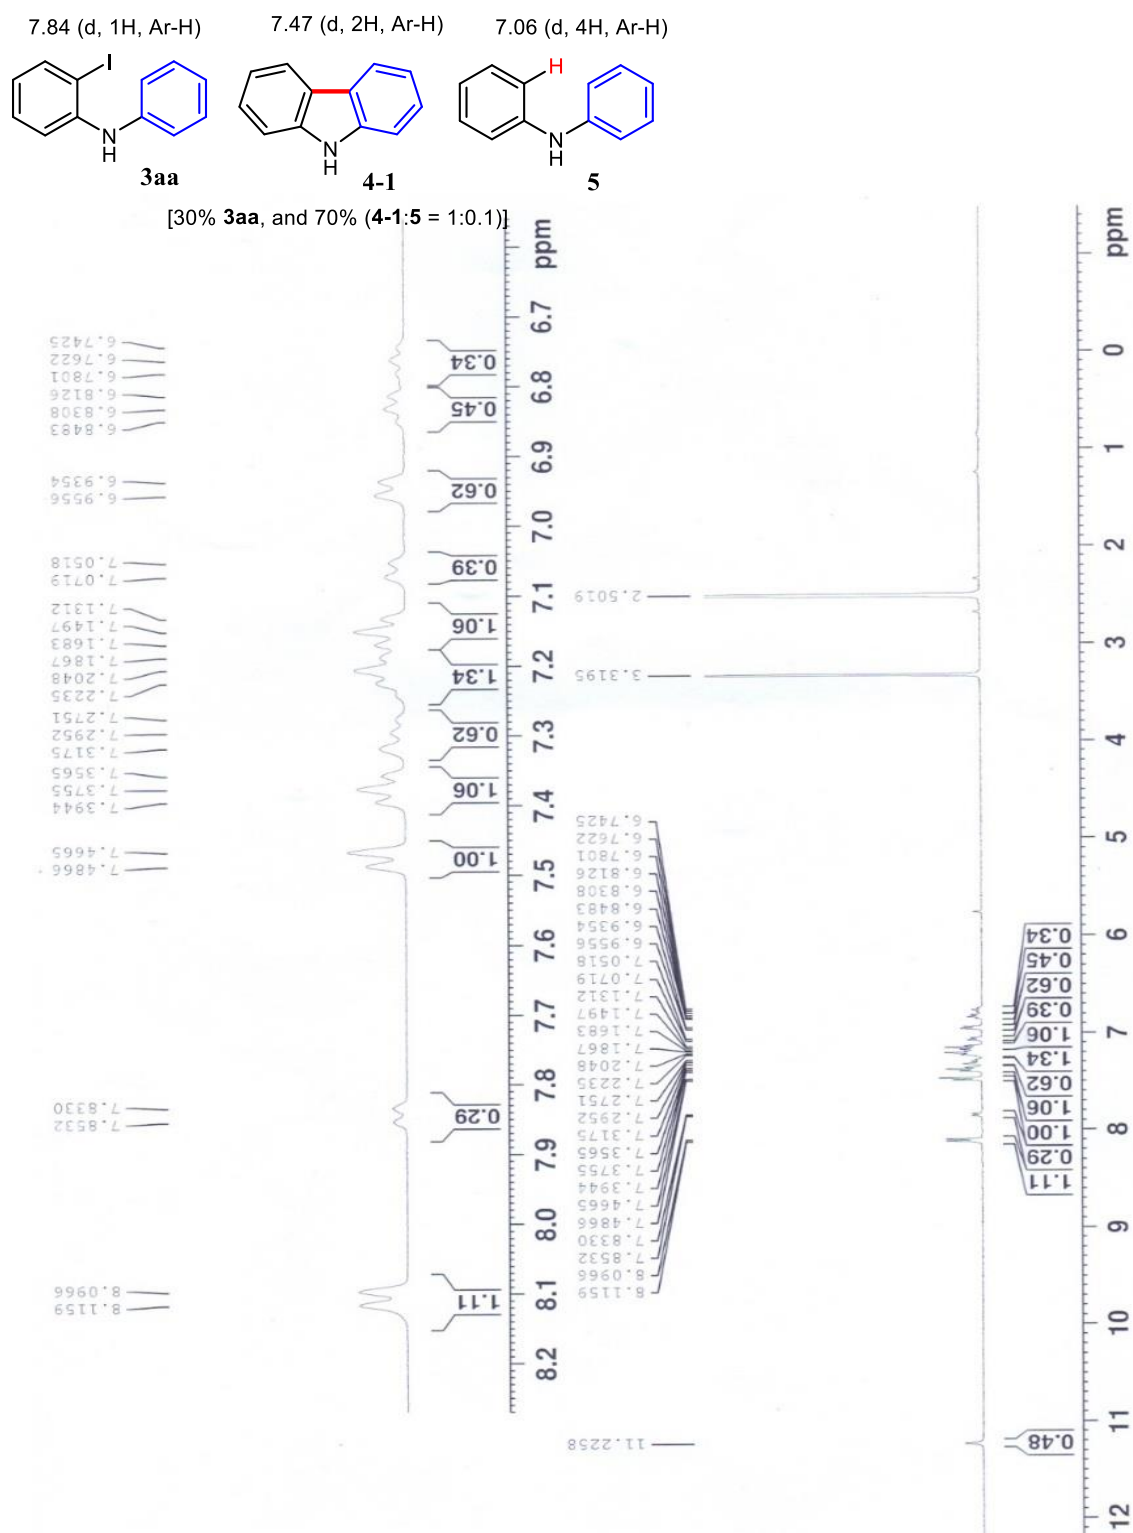

**Figure S1.** (a) Mass spectrum of DBU hydrolyzed compound, and (b-e)  $^1\text{H}$  NMR spectra of **3aa**, **4-1**, **5**, and reaction mixture of **3aa**.

**Table S1.** Optimization of reactions for Pd-catalyzed intramolecular aryl C–H activation of 2-iodo-*N*-phenylaniline **3aa** in water to give carbazole **4-1**.<sup>[a]</sup>

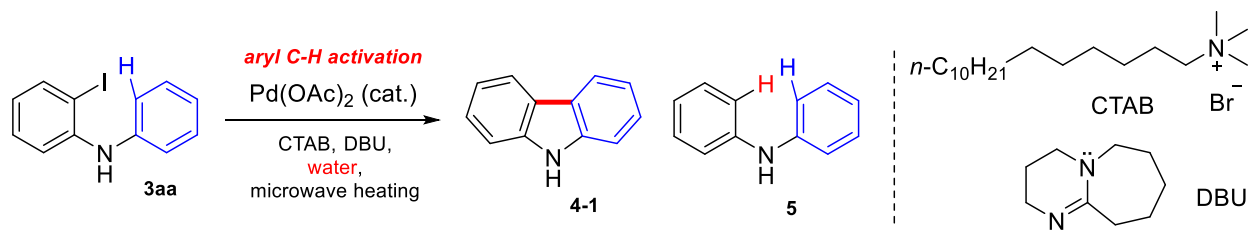

**a. Reactions with variable concentration of CTAB under microwave-assisted conditions.**

| Entry | [Pd] (mol%)              | Base (equiv.) | Surfactant (equiv.) | Temperature (°C) | Time (h) | Yield of <b>4-1+5</b> (%) <sup>[b]</sup><br>( <b>4-1</b> : <b>5</b> ) |
|-------|--------------------------|---------------|---------------------|------------------|----------|-----------------------------------------------------------------------|
| 1     | Pd(OAc) <sub>2</sub> (5) | DBU (2)       | CTAB (0.1)          | 100              | 1 h      | 99                                                                    |
| 2     | Pd(OAc) <sub>2</sub> (5) | DBU (2)       | CTAB (1)            | 100              | 1 h      | 99                                                                    |
| 3     | Pd(OAc) <sub>2</sub> (5) | DBU (2)       | CTAB (0.5)          | 100              | 1 h      | 99                                                                    |
| 4     | Pd(OAc) <sub>2</sub> (5) | DBU (2)       | CTAB (0.02)         | 100              | 1 h      | 70 (1:0.1)                                                            |

**b. Reactions with variable concentration of DBU under microwave-assisted conditions.**

| Entry | [Pd] (mol%)              | Base (equiv.) | Surfactant (equiv.) | Temperature (°C) | Time (h) | Yield of <b>4-1</b> (%) <sup>[b]</sup> |
|-------|--------------------------|---------------|---------------------|------------------|----------|----------------------------------------|
| 1     | Pd(OAc) <sub>2</sub> (5) | DBU (2)       | CTAB (0.1)          | 100              | 1 h      | 99                                     |
| 2     | Pd(OAc) <sub>2</sub> (5) | DBU (3)       | CTAB (0.1)          | 100              | 1 h      | 99                                     |
| 3     | Pd(OAc) <sub>2</sub> (5) | DBU (1)       | CTAB (0.1)          | 100              | 1 h      | 81                                     |
| 4     | Pd(OAc) <sub>2</sub> (5) | DBU (1)       | CTAB (0.1)          | 100              | 1.5 h    | 82                                     |
| 5     | Pd(OAc) <sub>2</sub> (5) | -             | CTAB (0.1)          | 100              | 1.5 h    | 0                                      |

**c. Reactions with variable reaction time under microwave-assisted conditions.**

| Entry | [Pd] (mol%)              | Base (equiv.) | Surfactant (equiv.) | Temperature (°C) | Time (min) | Yield of <b>4-1</b> (%) <sup>[b]</sup> |
|-------|--------------------------|---------------|---------------------|------------------|------------|----------------------------------------|
| 1     | Pd(OAc) <sub>2</sub> (5) | DBU (2)       | CTAB (0.1)          | 100              | 20         | 40                                     |
| 2     | Pd(OAc) <sub>2</sub> (5) | DBU (2)       | CTAB (0.1)          | 100              | 30         | 60                                     |
| 3     | Pd(OAc) <sub>2</sub> (5) | DBU (2)       | CTAB (0.1)          | 100              | 40         | 70                                     |
| 4     | Pd(OAc) <sub>2</sub> (5) | DBU (2)       | CTAB (0.1)          | 100              | 50         | 91                                     |
| 5     | Pd(OAc) <sub>2</sub> (5) | DBU (2)       | CTAB (0.1)          | 100              | 60         | 99                                     |
| 6     | Pd(OAc) <sub>2</sub> (5) | DBU (2)       | CTAB (0.1)          | 100              | 70         | 99                                     |
| 7     | Pd(OAc) <sub>2</sub> (5) | DBU (2)       | CTAB (0.1)          | 100              | 80         | 98                                     |
| 8     | Pd(OAc) <sub>2</sub> (5) | DBU (2)       | CTAB (0.1)          | 100              | 90         | 99                                     |
| 9     | Pd(OAc) <sub>2</sub> (5) | DBU (2)       | CTAB (0.1)          | 100              | 120        | 98                                     |



**d. Reactions with variable reaction temperature under microwave-assisted conditions.**

| Entry | [Pd] (mol%)              | Base (equiv.) | Surfactant (equiv.) | Time (min) | Temperature (°C) | Yield of <b>4-1</b> (%) <sup>[b]</sup> |
|-------|--------------------------|---------------|---------------------|------------|------------------|----------------------------------------|
| 1     | Pd(OAc) <sub>2</sub> (5) | DBU (2)       | CTAB (0.1)          | 60         | 70               | 15                                     |
| 2     | Pd(OAc) <sub>2</sub> (5) | DBU (2)       | CTAB (0.1)          | 60         | 80               | 35                                     |
| 3     | Pd(OAc) <sub>2</sub> (5) | DBU (2)       | CTAB (0.1)          | 60         | 90               | 85                                     |
| 4     | Pd(OAc) <sub>2</sub> (5) | DBU (2)       | CTAB (0.1)          | 60         | 100              | 99                                     |
| 5     | Pd(OAc) <sub>2</sub> (5) | DBU (2)       | CTAB (0.1)          | 60         | 110              | 98                                     |
| 6     | Pd(OAc) <sub>2</sub> (5) | DBU (2)       | CTAB (0.1)          | 60         | 120              | 99                                     |
| 7     | Pd(OAc) <sub>2</sub> (5) | DBU (2)       | CTAB (0.1)          | 60         | 130              | 98                                     |
| 8     | Pd(OAc) <sub>2</sub> (5) | DBU (2)       | CTAB (0.1)          | 60         | 140              | 98                                     |

[a] **Reaction conditions:** **3aa** (0.4 mmol, 1 equiv), Pd(OAc)<sub>2</sub>, CTAB and DBU in 1 ml water under MW (60 W) at different temperature for 60 min in a capped vial in a microwave reactor. [b] Isolated yields of carbazole **4-1** from silica gel column, and diphenylamine **5**.

**Dynamic light scattering (DLS) study:** DLS study performed on Malvern instrument UK, Zetasizer Nano S. Model No: Zen 6000.

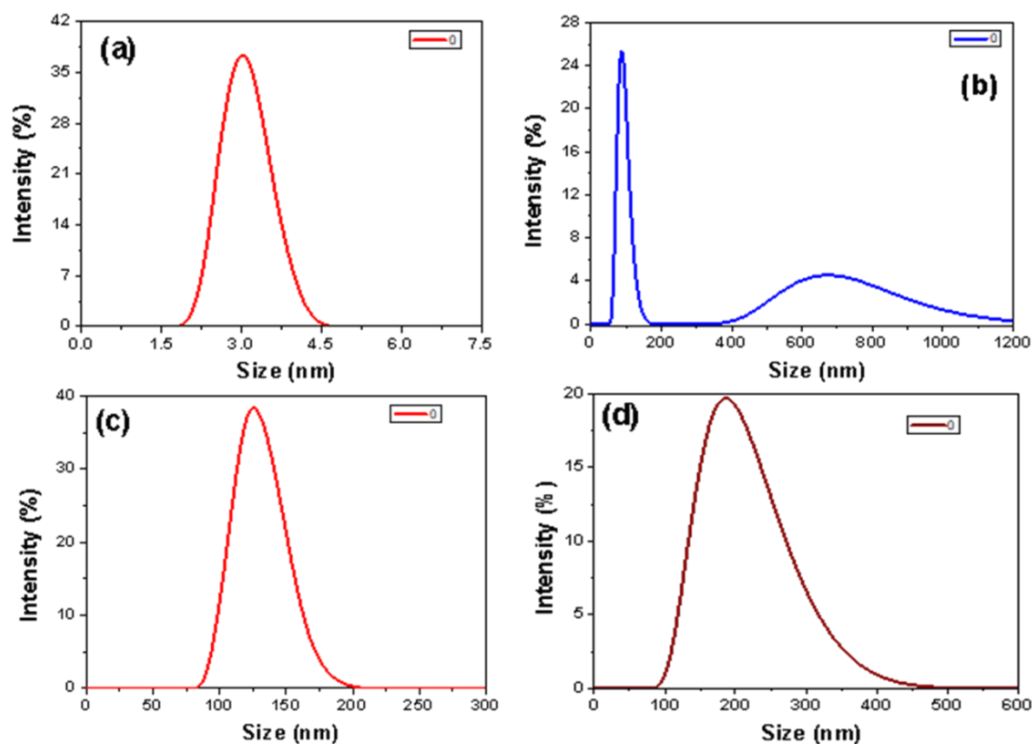

**Figure S2.** Plots of DLS data of (a) Pd(OAc)<sub>2</sub>/CTAB in water at room temperature. (b) Pd(OAc)<sub>2</sub>/CTAB in water after microwave-assisted heating at 100 °C for 15 min (60 W). (c) Pd(OAc)<sub>2</sub>/CTAB/DBU in water after microwave-

assisted heating at 100 °C for 15 min (60 W). (d) Recovered aqueous part of the reaction mixture from **3aa**/Pd(OAc)<sub>2</sub>/CTAB/DBU, after microwave-assisted heating at 100 °C for 60 min (60W).

In order to confirm CTAB micelles' stability, dynamic light scattering (DLS) data of the aqueous Pd(OAc)<sub>2</sub>/CTAB combination have been collected under different conditions (Figure S2). There DLS data of aqueous Pd(OAc)<sub>2</sub>-CTAB mixture at room temperature showed formation of particles having dimension around 3 nm corresponding to the formation of CTAB micelles (Figure S2a). Upon microwave-assisted heating at 100 °C, size of the Pd nanoparticles surrounding CTAB micelles with solvent shells having hydrodynamic diameter around ~ 100 nm, along with some bigger particles with size around 700 nm were observed (Figure S2b). In presence of DBU, the particle size was found to decrease with more or less uniform distribution with dimension around 125 nm (Figure S2c). Size of the particles observed from the recovered aqueous part of carbazole (**4-1**) forming reaction mixture of 2-iodo-*N*-phenylaniline **3aa**, was found around 200 nm (Figure S2d). The observed larger particle size hints at the association of CTAB micelles to the in situ generated palladium nanoparticles (PdNPs). Thus similarity in particle size and their distribution observed from the Pd(OAc)<sub>2</sub>-CTAB-DBU system and the recovered aqueous part of the reactions mixture hints at the stability of CTAB micelles under the reaction conditions.

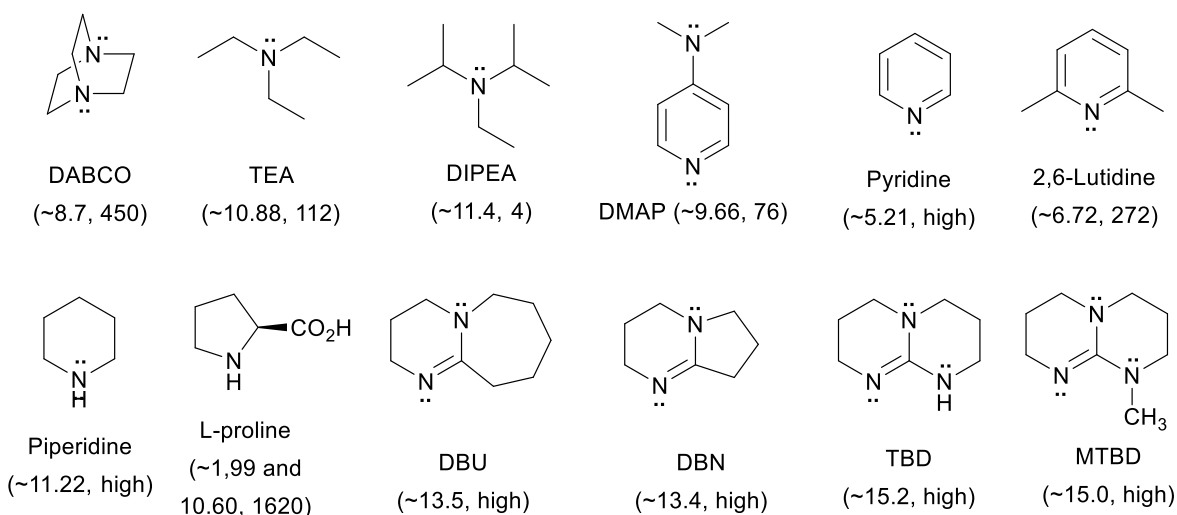

**Figure S3.** Structure of few organic bases with the  $pK_a$  values of their conjugate acids in water at 25 °C, and their solubility (g/L) in water at 20-25 °C.

**4. Kinetic study: Control experiments on Pd-catalyzed intramolecular aryl C–H activation of 2-iodo-*N*-phenylaniline **3aa** in water to give carbazole **4-1**.**

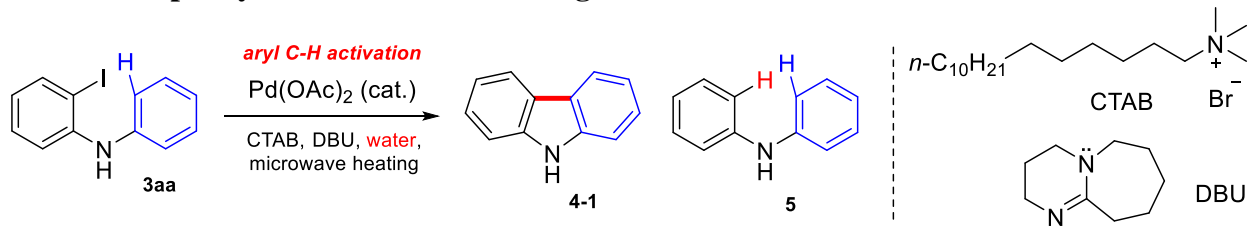

**4.1 Calculation of molar extinction coefficient ( $\epsilon_{\text{max}}$ ) value of carbazole (**4-1**) from absorbance in methanol (Spectroscopic grade MeOH).**

Stock solution of 2-iodo-*N*-phenylaniline (**3aa**) was prepared by dissolving 2.9 mg (0.01 mmol) in 0.5 ml MeOH (spectroscopic grade). Using this stock solutions absorbance of **3aa** was measured to find out its  $\lambda_{\text{max}}$  value in MeOH (Figure S4a). Stock solution of diphenylamine (**5**) was prepared by dissolving 1.7 mg (0.01 mmol) in 0.5 ml MeOH, and its absorbance of **5** was measured to find out its  $\lambda_{\text{max}}$  value in MeOH (Figure S4b).

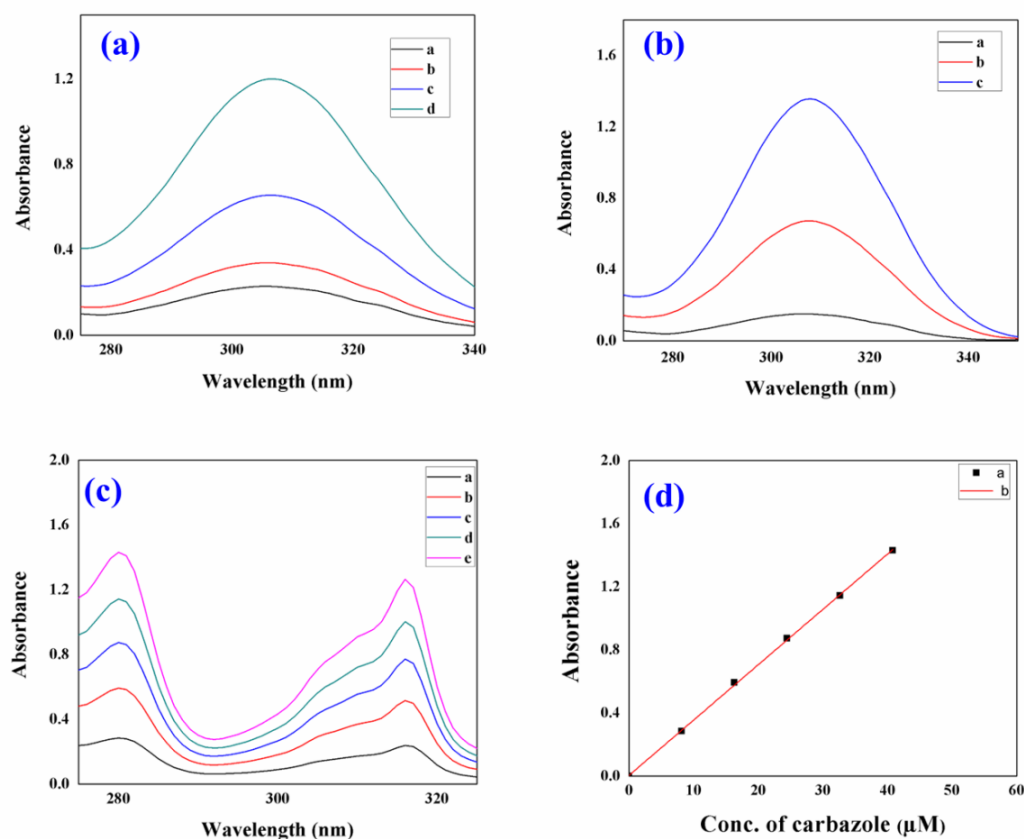

**Figure S4.** (a) Absorbance vs Wavelength plot of 2-iodo-*N*-phenylaniline (**3aa**), and there  $\lambda_{\text{max}}$  was found at 306 nm in MeOH. (b) Absorbance vs Wavelength plot of diphenylamine **5**, and there  $\lambda_{\text{max}}$  was found at 307 nm in MeOH. (c) Absorbance vs Wavelength plot of carbazole (**4-1**), and there are two main absorption peaks ( $\lambda_{\text{max}}$ ) were observed at 281 and 316 nm. (d) Absorbance vs concentration plot of carbazole (**4-1**).

Stock solution of carbazole **4-1** was prepared by dissolving 1.7 mg (0.01 mmol) in 0.5 ml MeOH. Thus, concentration of stock solution of carbazole [**4-1**] was  $0.0204 \times 10^3$  mmol/L. Concentration of 1  $\mu$ L stock solution of carbazole in 2.5 ml MeOH (in UV cuvette) was  $8.134 \times 10^{-6}$  M (8.13  $\mu$ M). Using this stock solutions absorbance of carbazole (**4-1**) was measured to find out its  $\lambda_{\text{max}}$  value in MeOH (Figure S4c). There two main peaks for carbazole were observed at 281 nm and 316 nm. The peak at  $\lambda_{\text{max}}$  281 nm was chosen for absorbance measurement of carbazole **4-1** as other peaks at higher wavelength were present in the region of the peak of 2-iodo-*N*-phenylaniline **3aa** at  $\lambda_{\text{max}}$  306 nm. From the slope of absorbance vs concentration plot of carbazole **4-1** (Figure S4d), molar extinction coefficient ( $\epsilon_{\text{max}}$ ) of carbazole **4-1** was found  $35,340 \text{ M}^{-1} \text{ cm}^{-1}$  (Table S2a).

**Table S2.** Absorbance of carbazole (**4-1**) at  $\lambda_{\text{max}}$  281 nm with known concentration in MeOH.

| Entry | Volume of stock solution of carbazole ( <b>4-1</b> ) taken | Concentration of carbazole ( <b>4-1</b> ) in $\mu\text{M}$ ( $10^{-6}$ M) | Absorbance (at $\lambda_{\text{max}}$ 281 nm ) | Molar extinction coefficient ( $\epsilon_{\text{max}}$ in $\text{M}^{-1} \text{ cm}^{-1}$ ) from slope of the Absorbance vs Concentration of carbazole ( <b>4-1</b> ) plot |
|-------|------------------------------------------------------------|---------------------------------------------------------------------------|------------------------------------------------|----------------------------------------------------------------------------------------------------------------------------------------------------------------------------|
| 1     | 1 $\mu\text{L}$                                            | 8.13 $\mu\text{M}$                                                        | 0.284                                          | 35,340                                                                                                                                                                     |
| 2     | 2 $\mu\text{L}$                                            | 16.26 $\mu\text{M}$                                                       | 0.592                                          |                                                                                                                                                                            |
| 3     | 3 $\mu\text{L}$                                            | 24.39 $\mu\text{M}$                                                       | 0.872                                          |                                                                                                                                                                            |
| 4     | 4 $\mu\text{L}$                                            | 32.52 $\mu\text{M}$                                                       | 1.143                                          |                                                                                                                                                                            |
| 5     | 5 $\mu\text{L}$                                            | 40.65 $\mu\text{M}$                                                       | 1.430                                          |                                                                                                                                                                            |

Molar extinction coefficient ( $\epsilon_{\text{max}}$ ) = slope of Absorbance vs Conc. plot =  $0.03534 \times 10^6 = 35,340 \text{ M}^{-1} \text{ cm}^{-1}$

## 4.2 Determination of rate constant value (k):

### 4.2.1 Control experiments for the synthesis of carbazole **4-1** under micellar conditions (with addition of CTAB) under microwave.

Reactions were conducted following the optimized conditions (Entry 12, Table 1, in the Manuscript) for 10 min to 60 min run time under microwave-assisted heating conditions at 100 °C (60 W), using 2-iodo-*N*-phenylaniline **3aa** (32.5 mg, 0.1101 mmol), CTAB (0.1 equiv.), Pd(OAc)<sub>2</sub> (4 mol%) and DBU (2 equiv.) in a capped microwave vial (10 ml) containing a stir bar, deionized water (0.5 ml). The reaction mixture was cooled to room temperature, diluted with 8.5 ml MeOH (spectroscopic grade). Then absorbance of the solutions obtained from each reaction were measured, and from the observed absorbance values at  $\lambda_{\text{max}}$  281 nm (Figure S5a), concentrations of product (carbazole, **4-1**) were

calculated (Table S3). Then concentration of carbazole (**4-1**) vs reaction time plot was drawn (Figure S5a), which showed exponential curve passing through the origin indicating pseudo first order reaction. Concentration of 2-iodo-*N*-phenylaniline (**3aa**) vs reaction time plot was also drawn (Figure S5c). There after we have drawn ln(conc. of carbazole) vs time plot (Figure S5d), that showed a linear plot with a slope  $0.012 \text{ min}^{-1}$  or  $2.0 \times 10^{-4} \text{ s}^{-1}$ . Thus the rate constant ( $k$ ) of the reaction was found  $2.0 \times 10^{-4} \text{ s}^{-1}$ , at  $100^\circ \text{C}$ .

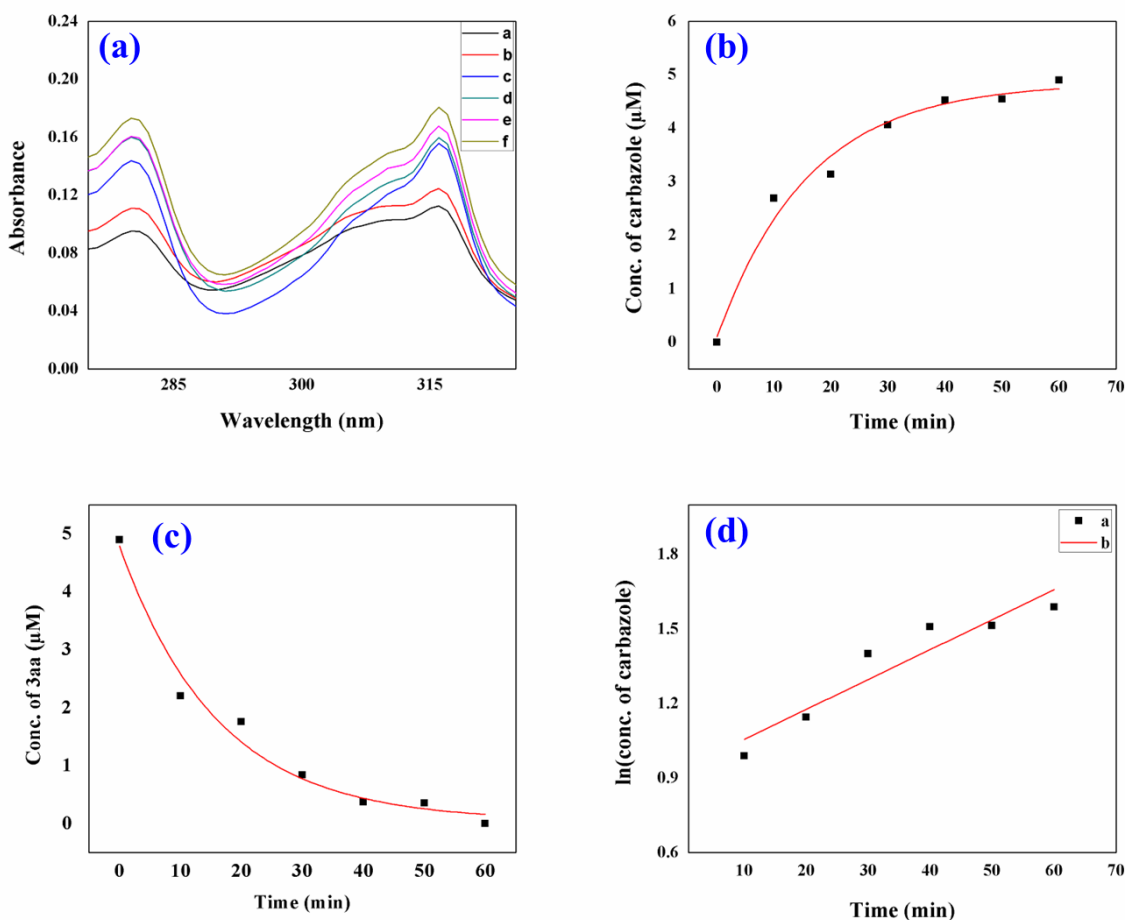

**Figure S5.** (a) Absorbance vs Wavelength plots of carbazole (**4-1**) of the reaction mixtures (reaction time 10 min to 60 min) in presence of CTAB. (b) Conc. of carbazole (**4-1**) vs reaction time plot. (c) Conc. Of 2-iodo-*N*-phenylaniline (**3aa**) vs reaction time plot. (d) ln (Conc. of carbazole, **4-1**) vs reaction time plot.

Initial concentration of 2-iodo-*N*-phenylaniline (**3aa**):  $c = 32.5 \text{ mg}/295.12 = 0.1101 \text{ mmol}$  in 9 ml solution. Thus,  $0.1101 \text{ mmol}/9 \times 10^{-3} \text{ lit} = 12.236 \text{ mmol/lit} = 12.236 \times 10^{-3} \text{ mol/lit}$ . So, 1 lit solution contains  $12.236 \times 10^{-3} \text{ mole}$ .  $1 \mu\text{L} = 10^{-6} \text{ lit}$  contains  $= 12.236 \times 10^{-3} \text{ mole} \times 10^{-6} = 12.236 \times 10^{-9} \text{ mole}$ . Now,  $1 \mu\text{L}$  of it was added to 2.5 ml MeOH in UV cuvette. So,  $2.5 \text{ ml} = 2.5 \times 10^{-3} \text{ lit}$  solution contained  $12.236 \times 10^{-9} \text{ mole}$  **3aa**, and 1 lit contains  $12.236 \times 10^{-9} / 2.5 \times 10^{-3} = 4.894 \times 10^{-6} \text{ mole}$  of **3aa** ( $4.894 \mu\text{M}$ ).

**Table S3a.** Concentrations of carbazole (**4-1**) obtained from Absorbance vs Wavelength plots of the reaction mixtures with run time 10 min to 60 min, under Micellar conditions.

| Entry | Reaction time<br><br>(Vol. of solution taken 2 $\mu$ L) | Absorbance at $\lambda_{\text{max}}$ 281 nm | Concentration of product carbazole ( <b>4-1</b> ) at $\lambda_{\text{max}}$ 281 nm<br><br>[c = [ <b>4-1</b> ]/ $\epsilon_{\text{max}}$ ]<br>( $\epsilon_{\text{max}}$ = 35,340 $\text{M}^{-1} \text{cm}^{-1}$ ) | Initial concentration of 2-iodo- <i>N</i> -phenylaniline ( <b>3aa</b> ) | Yield of carbazole <b>4-1</b> (from UV-Vis)<br><br>[ <b>4-1</b> ]/[ <b>3aa</b> ] $\times$ 100% | ln [Conc. of carbazole] |
|-------|---------------------------------------------------------|---------------------------------------------|-----------------------------------------------------------------------------------------------------------------------------------------------------------------------------------------------------------------|-------------------------------------------------------------------------|------------------------------------------------------------------------------------------------|-------------------------|
| 1     | 0 min                                                   | 0.0                                         | 0.0                                                                                                                                                                                                             | 4.894 $\mu\text{M}$                                                     | 0 (0)                                                                                          | -                       |
| 2     | 10 min                                                  | 0.0951                                      | 2.691 $\mu\text{M}$                                                                                                                                                                                             | 4.894 $\mu\text{M}$                                                     | 53%                                                                                            | 0.989                   |
| 3     | 20 min                                                  | 0.1110                                      | 3.140 $\mu\text{M}$                                                                                                                                                                                             | 4.894 $\mu\text{M}$                                                     | 64%                                                                                            | 1.144                   |
| 5     | 30 min                                                  | 0.1437                                      | 4.067 $\mu\text{M}$                                                                                                                                                                                             | 4.894 $\mu\text{M}$                                                     | 83%                                                                                            | 1.400                   |
| 6     | 40 min                                                  | 0.1599                                      | 4.524 $\mu\text{M}$                                                                                                                                                                                             | 4.894 $\mu\text{M}$                                                     | 92 %                                                                                           | 1.509                   |
| 5     | 50 min                                                  | 0.1605                                      | 4.541 $\mu\text{M}$                                                                                                                                                                                             | 4.894 $\mu\text{M}$                                                     | 93%                                                                                            | 1.513                   |
| 6     | 60 min                                                  | 0.1731                                      | 4.869 $\mu\text{M}$                                                                                                                                                                                             | 4.894 $\mu\text{M}$                                                     | 100%                                                                                           | 1.588                   |

Rate constant (k) = slope of ln(conc. of carbazole) vs time plot =  $0.012 \text{ min}^{-1} = 2.0 \times 10^{-4} \text{ s}^{-1}$ .

#### 4.2.2 Control experiments for synthesis of carbazole **4-1** without addition of CTAB, under microwave.

Two reactions were conducted following the optimized conditions, however without addition of CTAB for 30 min and 60 min run times under microwave-assisted heating conditions at 100  $^{\circ}\text{C}$  (60 W), using 2-iodo-*N*-phenylaniline **3aa** (32.5 mg, 0.1101 mmol),  $\text{Pd}(\text{OAc})_2$  (4 mol%) and DBU (2 equiv.) in a capped microwave vial (10 ml) containing a stir bar, deionized water (0.5 ml). The reaction mixture was cooled to room temperature, and diluted with 8.5 ml MeOH (spectroscopic grade).

Then absorbance of the solutions obtained from each reaction were measured, and from the observed absorbance values at  $\lambda_{\text{max}}$  281 nm (Figure S6a), concentrations of product (carbazole, **4-1**) were calculated (Table S3b). Then

concentrations of carbazole (**4-1**) vs reaction time plot was drawn (Figure S6b). Here yields of carbazoles were found less than the reactions which were performed with the addition of CTAB.

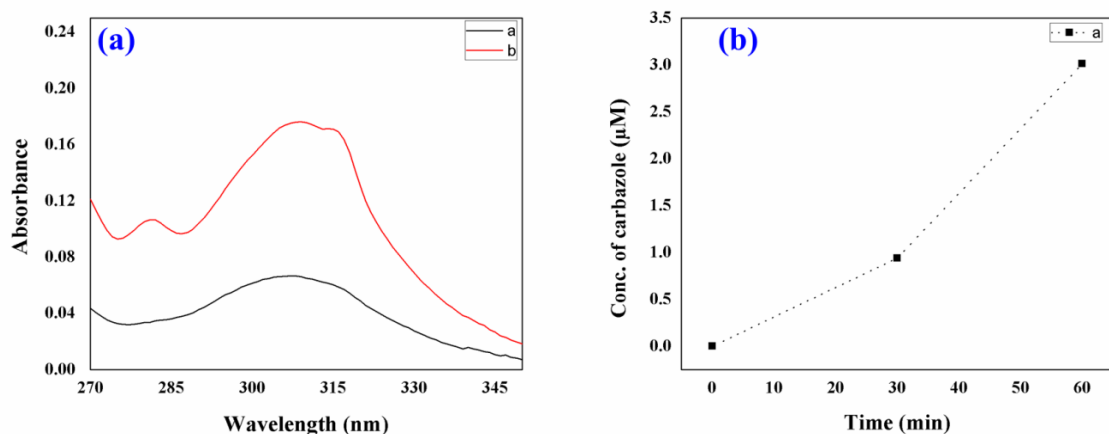

**Figure S6.** (a) Absorbance vs Wavelength plots of carbazole (**4-1**) of the reaction mixtures of 30 min and 60 min run time, in absence of CTAB. (b) Conc. of carbazole (**4-1**) vs reaction time plot.

**Table S3b.** Concentrations of carbazole (**4-1**) obtained from Absorbance vs Wavelength plots of the reaction mixtures of 30 min and 60 min run time, in absence of CTAB.

| Entry | Reaction time<br>(Vol. of solution taken 2 $\mu\text{L}$ ) | Absorbance at $\lambda_{\text{max}}$ 281 nm | Concentration of product carbazole ( <b>4-1</b> ) at $\lambda_{\text{max}}$ 281 nm<br>$[c = [\mathbf{4-1}]/\epsilon_{\text{max}}]$<br>( $\epsilon_{\text{max}} = 35,340$ ) | Initial concentration of 2-iodo- <i>N</i> -phenylaniline ( <b>3aa</b> ) | Yield of carbazole <b>4-1</b> (from UV-Vis)<br>$[\mathbf{4-1}]/[\mathbf{3aa}] \times 100\%$ |
|-------|------------------------------------------------------------|---------------------------------------------|----------------------------------------------------------------------------------------------------------------------------------------------------------------------------|-------------------------------------------------------------------------|---------------------------------------------------------------------------------------------|
| 1     | 0 min                                                      | 0.0                                         | 0.0                                                                                                                                                                        | 4.894 $\mu\text{M}$                                                     | 0%                                                                                          |
| 2     | 30 min                                                     | 0.0335                                      | 0.947 $\mu\text{M}$                                                                                                                                                        | 4.894 $\mu\text{M}$                                                     | 19%                                                                                         |
| 3     | 60 min                                                     | 0.1065                                      | 3.013 $\mu\text{M}$                                                                                                                                                        | 4.894 $\mu\text{M}$                                                     | 62%                                                                                         |

**Table S3c.** Yields carbazole **4-1** under different conditions.

| Entry | Reaction conditions                                                                                    | UV-Vis yield of carbazole <b>4-1</b><br>(Isolated yield of <b>4-1</b> ) (%) |
|-------|--------------------------------------------------------------------------------------------------------|-----------------------------------------------------------------------------|
| 1     | <b>3aa</b> , Pd(OAc) <sub>2</sub> , CTAB, DBU, MW, 100 °C, 60 min                                      | 100 (99)                                                                    |
| 2     | <b>3aa</b> , Pd(OAc) <sub>2</sub> , DBU, water, MW, 100 °C, 60 min<br>(Without CTAB)                   | 62 (36% <b>4-1</b> , and 14% <b>5</b> )                                     |
| 3     | <b>3aa</b> , Pd(OAc) <sub>2</sub> , CTAB, MW, 100 °C, 60 min<br>(without DBU)                          | 0 (0)                                                                       |
| 4     | <b>3aa</b> , Pd(OAc) <sub>2</sub> , DBU, CTAB, 100 °C, 60 min<br>(Conventional heating in an oil bath) | 0 (0)                                                                       |
| 5     | <b>3aa</b> , Pd(OAc) <sub>2</sub> , DBU, CTAB, 100 °C, 24 h<br>(Conventional heating in an oil bath)   | not checked (60)                                                            |
| 6     | <b>3aa</b> , Pd(OAc) <sub>2</sub> , DBU, CTAB, 140 °C, 24 h<br>(Conventional heating in an oil bath)   | not checked (93)                                                            |

### 5.1 Preparation of palladium nanoparticles (PdNPs) catalysts **1** and **2**.

To a light brown suspension of Pd(OAc)<sub>2</sub> (3.6 mg, 0.016 mmol) in deionized water (1.0 ml) in a microwave vial (10 ml), CTAB (14.6 mg, 0.04 mmol) was added at room temperature followed by N<sub>2</sub> gas purging for 2 minutes to give a chocolate brown suspension (Figure S7, vial a,b). Then DBU (121.8 mg, 0.8 mmol) was added to the chocolate brown suspension at room temperature. The chocolate brown suspension turned to a colorless clear solution (Figure S7, vial c). Then after purging N<sub>2</sub> gas for 2 minutes at room temperature the clear solution was heated under microwave irradiation in a capped vial at 100 °C for 15 min (60 W). That resulted in the formation of black colloidal matter (Figure S7, vial d). After cooling to room temperature, it was centrifuged (at 21000 RCF, 25 °C) for 30 min. The supernatant was removed by a syringe, and deionized water (1 ml), was added to the blackish residue. It was again centrifuged (at 21000 RCF, 25 °C) for 30 min, then supernatant was removed by a syringe, and the blackish residue was collected on a clean watch glass for drying on a hot air oven (>100 °C) for 72 h to get the Pd catalyst for characterization study (PdNPs catalyst 1).

In order to compare the characterization data as well as reaction efficiency of the catalysts, Pd catalyst was also prepared without adding DBU. There the chocolate brown suspension of Pd(OAc)<sub>2</sub> and CTAB in water (Figure S7, vial b) was heated under microwave irradiation in a capped vial at 100 °C for 15 min (60 W) to get another black colloidal matter (Figure S7, vial e). After cooling to room temperature, it was centrifuged (at 21000 RCF, 25 °C) for 30 min. The supernatant was removed by a syringe, and deionized water (1 ml), was added to the blackish residue. It was again centrifuged (at 21000 RCF, 25 °C) for 30 min, then supernatant was removed by a syringe, and the blackish residue was collected on a clean watch glass for drying on a hot air oven (>100 °C) for 72 h to get the Pd catalyst 2 (PdNPs catalyst 2) for characterization study.



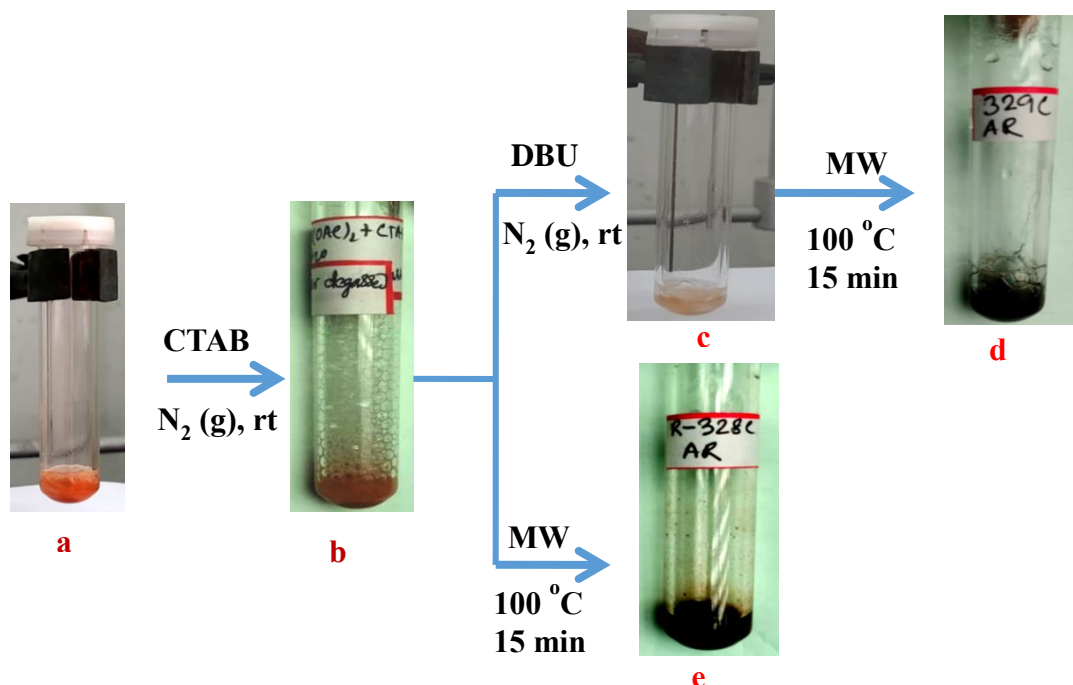

**Figure S7.** Preparation of PdNPs catalysts 1 and 2: (a) Pd(OAc)<sub>2</sub> in water at room temperature, (b) Chocolate brown suspension of Pd(OAc)<sub>2</sub> and CTAB in water under N<sub>2</sub> gas purging at room temperature, (c) Colorless clear solution after addition of DBU at room temperature, (d) Colloidal matter of PdNPs catalyst 1 after microwave irradiation (MW) at 100 °C (60 W) for 15 min. (e) Colloidal matter of PdNPs catalyst 2 after microwave irradiation (MW) at 100 °C (60 W) for 15 min.

## 5.2 Screening of PdNPs catalysts 1 and 2 for the optimization reactions of 3aa to give 4-1.

**Table S4.** Optimization of Pd-catalyzed intramolecular aryl C–H activation of **3aa** in water to give **4-1**<sup>[a]</sup>

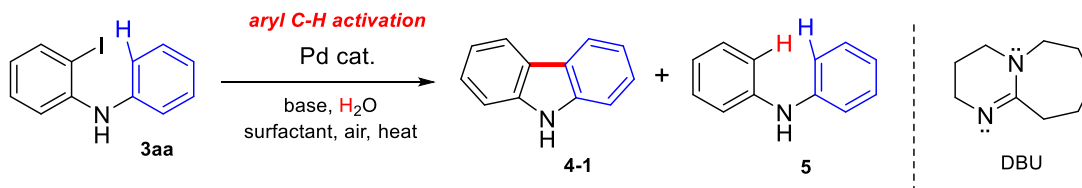

| Entry            | [Pd] (mol%)              | Base (equiv) | Surfactant (equiv) | Temp (°C), Mode, Time | Yield % ( <b>4-1</b> : <b>5</b> ) <sup>[b]</sup> |
|------------------|--------------------------|--------------|--------------------|-----------------------|--------------------------------------------------|
| 1                | Pd(OAc) <sub>2</sub> (4) | DBU (2)      | CTAB (0.1)         | 100, MW, 1 h          | 99                                               |
| 2 <sup>[c]</sup> | Pd catalyst 1 (aq.)      | -            | -                  | 100, MW, 1 h          | 90                                               |
| 3 <sup>[d]</sup> | Pd catalyst 1 (s)        | -            | -                  | 100, MW, 1 h          | 55                                               |
| 4 <sup>[d]</sup> | Pd catalyst 1 (s)        | DBU (2)      | -                  | 100, MW, 1 h          | 65                                               |
| 5 <sup>[d]</sup> | Pd catalyst 1 (s)        | DBU (2)      | CTAB (0.1)         | 100, MW, 1 h          | 75                                               |
| 6 <sup>[e]</sup> | Pd catalyst 2 (aq)       | -            | -                  | 100, MW, 1 h          | 20 (1:0.2)                                       |
| 7 <sup>[f]</sup> | Pd catalyst 2 (s)        | -            | -                  | 100, MW, 1 h          | 10 (1:0.4)                                       |
| 8 <sup>[f]</sup> | Pd catalyst 2 (s)        | DBU (2)      | CTAB (0.1)         | 100, MW, 1 h          | 40 (1:0.2)                                       |

<sup>[a]</sup>**Reaction conditions:** **3aa** (0.4 mmol, 1 equiv.), Pd salt, surfactant, base, water (1 ml), heat (in a capped vial in a microwave reactor, 60 W). <sup>[b]</sup> Isolated yields. <sup>[c]</sup> Reaction using the aqueous part of separately prepared Pd catalyst using Pd(OAc)<sub>2</sub> (4 mol%), CTAB (0.04 mmol) and DBU (0.8 mmol) in 1.0 ml water under MW at 100 °C. <sup>[d]</sup> Reaction using isolated black residue of the Pd catalyst prepared from Pd(OAc)<sub>2</sub> (4 mol%), CTAB (0.04 mmol) and DBU (0.8 mmol) in 1.0 ml water under MW at 100 °C (Pd catalyst 1). <sup>[e]</sup> Reaction using the aqueous part of separately prepared Pd catalyst using Pd(OAc)<sub>2</sub> (4 mol%) and CTAB (0.04 mmol) in 1.0 ml water under MW at 100 °C. <sup>[f]</sup> Reaction using isolated black residue of the Pd catalyst prepared from Pd(OAc)<sub>2</sub> (4 mol%) and CTAB (0.04 mmol) in 1.0 ml water under MW at 100 °C (Pd catalyst 2).

**Table S5.** Screening of Pd-catalyzed intramolecular aryl C–H activation reactions of 2-iodo-*N*-phenylaniline **3aa**, 2-bromo-*N*-phenylaniline **3a'a**, and 2-chloro-*N*-phenylaniline **3a''a**, under microwave-assisted conditions in water to give carbazole **4-1**.<sup>[a]</sup>

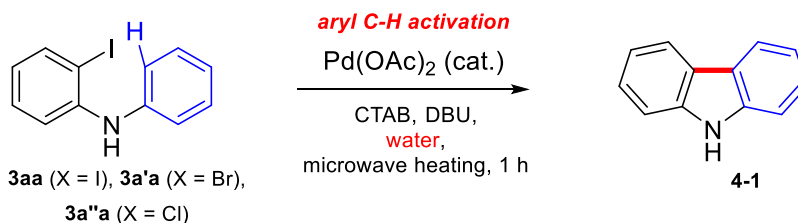

| Entry | Reactant     | [Pd] (mol%)              | Base (equiv.) | Surfactant (equiv.) | Temperature (°C) | Yield of <b>4-1</b> (%) <sup>[b]</sup> |
|-------|--------------|--------------------------|---------------|---------------------|------------------|----------------------------------------|
| 1     | <b>3aa</b>   | Pd(OAc) <sub>2</sub> (4) | DBU (2)       | CTAB (0.1)          | 70               | 15                                     |
| 2     | <b>3aa</b>   | Pd(OAc) <sub>2</sub> (4) | DBU (2)       | CTAB (0.1)          | 80               | 35                                     |
| 3     | <b>3aa</b>   | Pd(OAc) <sub>2</sub> (4) | DBU (2)       | CTAB (0.1)          | 90               | 85                                     |
| 4     | <b>3aa</b>   | Pd(OAc) <sub>2</sub> (4) | DBU (2)       | CTAB (0.1)          | 100              | 99                                     |
| 5     | <b>3aa</b>   | Pd(OAc) <sub>2</sub> (4) | DBU (2)       | CTAB (0.1)          | 110              | 98                                     |
| 6     | <b>3aa</b>   | Pd(OAc) <sub>2</sub> (4) | DBU (2)       | CTAB (0.1)          | 120              | 99                                     |
| 7     | <b>3aa</b>   | Pd(OAc) <sub>2</sub> (4) | DBU (2)       | CTAB (0.1)          | 130              | 98                                     |
| 8     | <b>3aa</b>   | Pd(OAc) <sub>2</sub> (4) | DBU (2)       | CTAB (0.1)          | 140              | 99                                     |
| 9     | <b>3a'a</b>  | Pd(OAc) <sub>2</sub> (4) | DBU (2)       | CTAB (0.1)          | 100              | 5                                      |
| 10    | <b>3a'a</b>  | Pd(OAc) <sub>2</sub> (4) | DBU (2)       | CTAB (0.1)          | 120              | 25                                     |
| 11    | <b>3a'a</b>  | Pd(OAc) <sub>2</sub> (4) | DBU (2)       | CTAB (0.1)          | 130              | 50                                     |
| 12    | <b>3a'a</b>  | Pd(OAc) <sub>2</sub> (4) | DBU (2)       | CTAB (0.1)          | 140              | 90                                     |
| 13    | <b>3a'a</b>  | Pd(OAc) <sub>2</sub> (4) | DBU (2)       | CTAB (0.1)          | 150              | 92                                     |
| 14    | <b>3a''a</b> | Pd(OAc) <sub>2</sub> (4) | DBU (2)       | CTAB (0.1)          | 100              | 0                                      |
| 15    | <b>3a''a</b> | Pd(OAc) <sub>2</sub> (4) | DBU (2)       | CTAB (0.1)          | 140              | 0                                      |
| 16    | <b>3a''a</b> | Pd(OAc) <sub>2</sub> (4) | DBU (2)       | CTAB (0.1)          | 150              | 0                                      |

<sup>[a]</sup>**Reaction conditions:** **3aa/3a'a/3a''a** (0.4 mmol, 1 equiv.), Pd(OAc)<sub>2</sub>, CTAB and DBU in 1 ml water under MW (60 W) at different temperatures for 1 h in a capped vial in a microwave reactor. <sup>[b]</sup> Isolated yields of **4-1**.

### 6.1 Typical procedure for the preparation of carbazole 4-1 via PdNPs-catalyzed aryl C–H activation of 2-iodo-*N*-phenylaniline 3aa under microwave-assisted heating in water.

To a mixture of 2-iodo-*N*-phenylaniline **3aa** (118 mg, 0.4 mmol), CTAB (15 mg, 0.04 mmol, 0.1 equiv.) and Pd(OAc)<sub>2</sub> (3.6 mg, 0.016 mmol, 4 mol%) in a microwave vial (10 ml) containing a stir bar, deionized water (1 ml) was added at room temperature. The mixture turned into a brown suspension. The vial was closed with a septum, and N<sub>2</sub> (g) was purged into it for 2 to 3 minutes to make the micelles of CTAB. Then DBU (120 µl, 122 mg, 0.8 mmol, 2.0 equiv.) was added to it by a syringe, and N<sub>2</sub> (g) was purged into it for 2 minutes at room temperature. The brown suspension became a colorless clear solution with the addition of DBU. The reaction vial was sealed with a plastic microwave septum replacing the previous septum. The capped reaction vial was submitted to a microwave reactor for microwave irradiation at 100 °C (60 W) for 1 h. The reaction mixture was cooled to room temperature, transferred into a centrifuge tube with the addition of ethyl acetate-hexane mixture (1 ml, 3:1 v/v), and centrifuged (at 21000 RCF, 25 °C) for 15 min. Then organic layer was collected by syringe, again ethyl acetate-hexane mixture (1 ml, 3:1 v/v) was added to the aqueous part in the centrifuge tube, and the mixture was centrifuged (at 21000 RCF, 25 °C) for 15 min. The aqueous and organic parts were collected separately by syringe, and the aqueous layer recovered from this reaction was saved for further use (for the next catalytic reaction of the same substrate). The combined organic part was washed with water (2 ml) followed by brine solution (2 ml), dried over anhydrous Na<sub>2</sub>SO<sub>4</sub>, and evaporated under reduced pressure. The crude product was purified through a silica gel (100-200 mesh) column using hexane/ethyl acetate mixtures (90:10) as the eluent to yield 9*H*-carbazole **4-1** (66.2 mg, 99%) as white solid.

Carbazoles derivatives **4-2** to **4-43** were prepared similarly from the respective 2-iodo-*N*-arylanilines **3** (Scheme S1).

### 6.2 TON (Turnover number) and TOF (Turnover frequency) calculations.

TON = [(Amount of reactant in mmol) / (Amount of catalyst in mmol)] × yield of product

$$= [0.4/0.016] \times 0.99 = 24.75$$

TOF = TON value/reaction time

$$= 24.75/1 \text{ h} = 24.75 \text{ h}^{-1}$$

### 6.3 Recycling studies and E-factor calculation.

2-Iodo-*N*-phenylaniline **3aa** (118 mg, 0.4 mmol) was added to the recovered aqueous part collected from the previous reaction, in a microwave vial (10 ml). Then CTAB (8 mg, 0.02 mmol, 0.05 equiv., in 0.2 ml water) and DBU (60 µl, 61 mg, 0.4 mmol, 1 equiv.) were added to it by a syringe, and N<sub>2</sub> (g) was purged into it for 2 minutes at room temperature. The reaction vial was sealed with a plastic microwave septum replacing the previous septum. The capped reaction vial with a stir bar was submitted to microwave reactor for microwave irradiation at 100 °C (60 W) for 1 h. Then reaction mixture was cooled to room temperature, transferred into a centrifuge tube with the addition of ethyl acetate-hexane mixture (1 ml, 3:1 v/v), and centrifuged (at 21000 RCF, 25 °C) for 15 min. It was done for two times (with the addition of ethyl acetate-hexane mixture (1 ml, 3:1 v/v)). Both the aqueous and organic parts were collected

separately. Product carbazole **4-1** was collected from the combined organic part, similarly as described in the typical procedure. The collected aqueous part containing the recovered Pd catalyst was used for successive recycling experiments by repeating the same procedure, only additional amount of CTAB (8 mg, in 0.2 ml water) and DBU (61 mg) were added to each recycling experiment (see Table S6).

**Table S6.** Recyclability of PdNPs catalyst in the reaction of **3aa** to give carbazole **4-1**.

| Number of cycles              | 1                | 2                | 3                | 4                | 5                |
|-------------------------------|------------------|------------------|------------------|------------------|------------------|
| Yields of <b>4-1</b> (amount) | 99%<br>(66.2 mg) | 96%<br>(64.2 mg) | 92%<br>(61.5 mg) | 90%<br>(60.2 mg) | 85%<br>(56.8 mg) |

$$\begin{aligned}
 \text{E-factor} &= (\text{Amount of organic waste in mg}) / (\text{Amount of product carbazole in mg}) \\
 &= (\text{Mass of all reactants and reagents taken} - \text{Mass of product obtained}) / (\text{Mass of product obtained}) \\
 &= [(258.6 - 66.2) + (258.6 - 64.2) + (258.6 - 61.5) + (258.6 - 60.2) + (258.6 - 56.8)] \text{ mg} / \\
 &\quad (66.2 + 64.2 + 61.5 + 60.2 + 56.8) \text{ mg} \\
 &= (192.4 + 194.4 + 197.1 + 198.4 + 201.8) \text{ mg} / 308.9 \text{ mg} \\
 &= 984.1 \text{ mg} / 308.9 \text{ mg} \\
 &= 3.18 \\
 [\text{Mass of all reactants and reagents taken}] &= (118 + 15 + 3.6 + 122) \text{ mg} = 258.6 \text{ mg}
 \end{aligned}$$

#### 6.4 Characterization data of carbazoles **4-1** to **4-43**, and diphenylamine **5**.

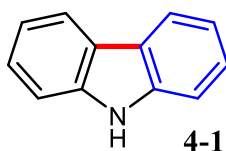

**9H-Carbazole (4-1)**<sup>[1]</sup>: White solid (66.2 mg, 99%); mp: 244-246 °C (ref.<sup>[1,2]</sup> 243.5-246 °C); <sup>1</sup>H NMR (400 MHz, DMSO-D<sub>6</sub>):  $\delta$  = 11.24 (brs, 1H, N-H), 8.10 (d,  $J$  = 7.7 Hz, 2H, Ar-H), 7.48 (d,  $J$  = 8.1 Hz, 2H, Ar-H), 7.37 (t,  $J$  = 7.3 Hz, 2H, Ar-H), 7.15 (t,  $J$  = 7.4 Hz, 2H, Ar-H) ppm; <sup>1</sup>H NMR (500 MHz, CDCl<sub>3</sub>):  $\delta$  = 8.08 (d,  $J$  = 8.0 Hz, 2H, Ar-H), 8.01 (brs, 1H, N-H), 7.43-7.39 (m, 4H, Ar-H), 7.24-7.21 (m, 2H, Ar-H) ppm; <sup>13</sup>C NMR (125 MHz, CDCl<sub>3</sub>):  $\delta$  = 139.70 (2C), 126.04 (2CH), 123.58 (2C), 120.54 (2CH), 119.66 (2CH), 110.78 (2 CH) ppm; IR (ATR):  $\tilde{\nu}$  = 3415 (N-H), 3051, 1625, 1449, 1138, 927, 720 cm<sup>-1</sup>; LCMS (ESI):  $m/z$  calcd. for [C<sub>12</sub>H<sub>9</sub>N+H]<sup>+</sup>: 168.08, found: 168.30. This compound was known.<sup>[1,2]</sup> TON 24.75.

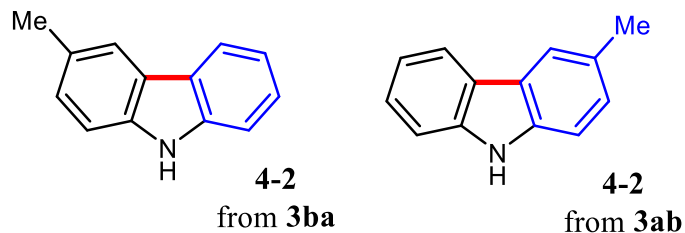

**3-Methyl-9H-carbazole (4-2)**<sup>[1,2]</sup>: Carbazole **4-2** was prepared according to the typical procedure from compound **3ba** or **3ab** (124 mg, 0.4 mmol), and purified by column chromatography on silica gel, eluting with hexane/ethyl acetate (95:5). Off-white solid (69 mg, 95% from **3ba** and 71 mg, 98% from **3ab**); mp: 202-204 °C (ref.<sup>[1,2]</sup> 206-208 °C); <sup>1</sup>H NMR (500 MHz, CDCl<sub>3</sub>):  $\delta$  = 8.03 (d,  $J$  = 7.5 Hz, 1H, Ar-H), 7.91 (brs, 1H, N-H), 7.86 (s, 1H, Ar-H), 7.39-7.38 (m, 2H, Ar-H), 7.31 (d,  $J$  = 8.0 Hz, 1H, Ar-H), 7.24-7.18 (m, 2H, Ar-H), 2.52 (s, 3H, Ar-CH<sub>3</sub>) ppm; <sup>13</sup>C NMR (125 MHz, CDCl<sub>3</sub>):  $\delta$  = 139.83 (C), 137.73 (C), 128.76 (C), 127.18 (CH), 125.65 (CH), 123.55 (C), 123.26 (C), 120.25 (2CH), 119.23 (CH), 110.55 (CH), 110.24 (CH), 21.44 (-CH<sub>3</sub>) ppm; IR (ATR):  $\tilde{\nu}$  = 3401 (N-H), 2916, 1458, 1333, 1226, 1171, 1028, 928, 886, 804, 727 cm<sup>-1</sup>; LCMS (ESI):  $m/z$  calcd. for [C<sub>13</sub>H<sub>11</sub>N+H]<sup>+</sup>: 182.09, found: 182.10. TON 23.75 from **3ba** and 24.5 from **3ab**.

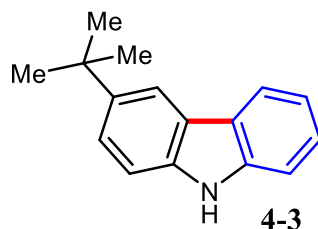

**3-(tert-Butyl)-9H-carbazole (4-3)**<sup>[3]</sup>: It was prepared according to the typical procedure from compound **3ca** (140 mg, 0.4 mmol), and purified by column chromatography on silica gel, eluting with hexane/ethyl acetate (95:5). White solid (87 mg, 98%); mp: 150-152 °C (ref.<sup>[3a]</sup> 150-152 °C); <sup>1</sup>H NMR (500 MHz, CDCl<sub>3</sub>):  $\delta$  = 8.08 (d,  $J$  = 6.0 Hz, 2H, Ar-H), 7.91 (brs, 1H, N-H), 7.48 (dt,  $J$  = 8.7, 1.4 Hz, 1H, Ar-H), 7.38 (dd,  $J$  = 3.8, 1.4 Hz, 2H, Ar-H), 7.34 (d,  $J$  = 8.5 Hz, 1H, Ar-H), 7.35-7.20 (m, 1H, Ar-H), 1.44 (s, 9H, C(CH<sub>3</sub>)<sub>3</sub>) ppm; <sup>13</sup>C NMR (125 MHz, CDCl<sub>3</sub>):  $\delta$  = 142.42 (C), 139.85 (C), 137.51 (C), 125.52 (CH), 123.80 (CH), 123.54 (C), 122.99 (C), 120.11 (CH), 119.16 (CH), 116.33 (CH), 110.52 (CH), 110.02 (CH), 34.67 (C), 31.97 (CH<sub>3</sub>) ppm; IR (ATR):  $\tilde{\nu}$  = 3419 (N-H), 3058, 2954, 2857, 1712, 1605, 1498, 1480, 1391, 1294, 1258, 1143, 1089, 885, 751 cm<sup>-1</sup>; HRMS (ESI):  $m/z$  calcd. for [C<sub>16</sub>H<sub>16</sub>N-H]<sup>+</sup>: 222.1283, found: 222.1287. TON 24.5.

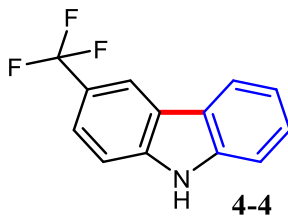

**3-(Trifluoromethyl)-9H-carbazole (4-4)**<sup>[4]</sup>: It was prepared according to the typical procedure from compound **3da** (145 mg, 0.4 mmol), and purified by column chromatography on silica gel, eluting with hexane/ethyl acetate (90:10). Off white solid (89 mg, 95%); mp: 164-166 °C (Ref.<sup>[4]</sup> 163.5-164.5 °C); <sup>1</sup>H NMR (500 MHz, CDCl<sub>3</sub>):  $\delta$  = 8.34 (s, 1H, Ar-H), 8.26 (brs, 1H, N-H), 8.11 (d,  $J$  = 7.8 Hz, 1H, Ar-H), 7.66 (dd,  $J$  = 8.5, 1.9 Hz, 1H, Ar-H), 7.50-7.46 (m, 3H, Ar-H), 7.30 (ddd,  $J$  = 7.9, 5.4, 2.6 Hz, 1H, Ar-H) ppm; <sup>13</sup>C NMR (125 MHz, CDCl<sub>3</sub>):  $\delta$  = 140.38 (C), 139.89 (C), 126.82 (CH), 126.27 (C), 124.11 (C), 122.89 (d,  $J_{CF}$  = 13.1 Hz, C), 122.67 (q,  $J_{CF}$  = 3.5 Hz, CH), 121.74 (q,  $J_{CF}$  = 31.8 Hz, C), 120.58 (CH), 120.29 (CH), 117.92 (q,  $J_{CF}$  = 8.0, 4.0, Hz CH), 110.93 (CH), 110.62 (CH) ppm; IR (ATR):  $\tilde{\nu}$  = 3352 (N-H), 3050, 2368, 1675, 1569, 1518, 1348, 1270, 1150, 935, 806, 735, 614 cm<sup>-1</sup>; HRMS (ESI):  $m/z$  calcd. for [C<sub>13</sub>H<sub>7</sub>F<sub>3</sub>N-H]<sup>+</sup>: 234.0531, found: 234.0534. TON 23.75.

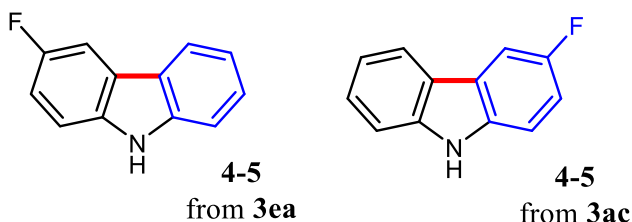

**3-Fluoro-9H-carbazole (4-5)**<sup>[1,2]</sup>: Carbazole **4-5** was prepared according to the typical procedure from **3ea** or **3ac** (125 mg, 0.4 mmol), and purified by column chromatography on silica gel, eluting with hexane/ethyl acetate (95:5). Off-white solid (73 mg, 99% from **3ea** and 72 mg, 97% from **3ac**); mp: 206-208 °C (ref.<sup>[1,2]</sup> 201.1-203.4 °C); <sup>1</sup>H NMR (500 MHz, CDCl<sub>3</sub>):  $\delta$  = 8.01 (dd,  $J$  = 8.0, 0.5 Hz, 1H, Ar-H), 7.98 (brs, 1H, N-H), 7.71 (dd,  $J$  = 8.5, 2.5 Hz, 1H, Ar-H), 7.44-7.39 (m, 2H, Ar-H), 7.32 (dd,  $J$  = 8.5, 4.0 Hz, 1H, Ar-H), 7.21 (ddd,  $J$  = 8.0, 5.5, 2.5 Hz, 1H, Ar-H), 7.14 (td,  $J$  = 9.0, 2.5 Hz, 1H, Ar-H) ppm; <sup>13</sup>C NMR (125 MHz, CDCl<sub>3</sub>):  $\delta$  = 157.04 (d,  $J_{CF}$  = 235.7 Hz, C), 140.75 (C), 135.97 (C), 126.64 (CH), 124.13 (d,  $J_{CF}$  = 9.5 Hz, C), 123.33 (d,  $J_{CF}$  = 3.6 Hz, C), 120.76 (CH), 119.69 (CH), 113.83 (d,  $J_{CF}$  = 25.1 Hz, CH), 111.30 (d,  $J_{CF}$  = 9.1 Hz, CH), 111.06 (CH), 106.21 (d,  $J_{CF}$  = 23.6 Hz, CH) ppm; IR (ATR):  $\tilde{\nu}$  = 3415 (N-H), 3053, 1936, 1896, 1585, 1456, 1275, 1165, 864, 805, 744 cm<sup>-1</sup>; LCMS (ESI):  $m/z$  calcd. for [C<sub>12</sub>H<sub>8</sub>FN-H]<sup>+</sup>: 184.05, found: 184.10. TON 24.75 from **3ea** and 24.25 from **3ac**.

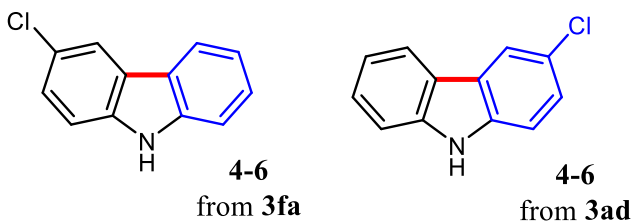

**3-Chloro-9H-carbazole (4-6)**<sup>[1,2]</sup>: Carbazole **4-6** was prepared according to the typical procedure from **3fa** or **3ad** (132 mg, 0.4 mmol), and purified by column chromatography on silica gel, eluting with hexane/ethyl acetate (95:5). White solid (78 mg, 97% from **3fa** and 77 mg, 95% from **3ad**); mp: 202-204 °C (ref.<sup>[1,2]</sup> 198-200 °C); <sup>1</sup>H NMR (500 MHz, CD<sub>3</sub>OD):  $\delta$  = 8.00 (s, 1H, Ar-H), 7.99 (d,  $J$  = 1.5 Hz, 1H, Ar-H), 7.43 (d,  $J$  = 8.0 Hz, 1H, Ar-H), 7.38-7.36 (m, 2H, Ar-H), 7.30 (dd,  $J$  = 8.5, 2.0 Hz, 1H, Ar-H), 7.14 (t,  $J$  = 8.0 Hz, 1H, Ar-H) ppm; <sup>13</sup>C NMR (125 MHz, CD<sub>3</sub>OD):

$\delta$  = 141.98 (C), 139.67 (C), 127.21 (CH), 126.37 (CH), 125.44 (C), 125.04 (C), 123.35 (C), 121.12 (CH), 120.51 (CH), 119.99 (CH), 112.77 (CH), 111.95 (CH) ppm; IR (ATR):  $\tilde{\nu}$  = 3400 (N–H), 3049, 2313, 1436, 1333, 1270, 928, 744  $\text{cm}^{-1}$ ; LCMS (ESI):  $m/z$  calcd. for  $[\text{C}_{12}\text{H}_8\text{ClN-H}]^+$ : 200.02, found: 200.00. TON 24.25 from **3fa** and 23.75 from **3ad**.

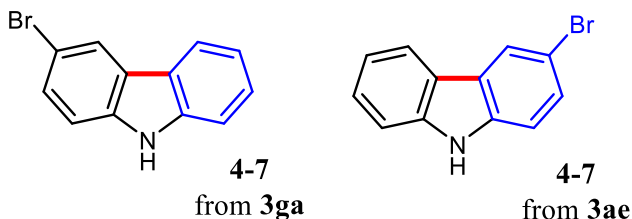

**3-Bromo-9H-carbazole (4-7)**<sup>[1,2]</sup>: Carbazole **4-7** was prepared according to the typical procedure from **3ga** or **3ae** (150 mg, 0.4 mmol), and purified by column chromatography on silica gel, eluting with hexane/ethyl acetate (95:5). White solid (89 mg, 91% from **3ga**, and 89 mg, 90% from **3ae**); mp: 194-196 °C (ref.<sup>[1,2]</sup> 193-195 °C); <sup>1</sup>H NMR (500 MHz, acetone- $d_6$ ):  $\delta$  = 10.52 (brs, 1H, residual N–H), 8.28 (t,  $J$  = 1.0 Hz, 1H, Ar–H), 8.15 (d,  $J$  = 8.0 Hz, 1H, Ar–H), 7.53 (d,  $J$  = 8.0 Hz, 1H, Ar–H), 7.49-7.48 (m, 2H, Ar–H), 7.42 (td,  $J$  = 8.0, 1.0 Hz, 1H, Ar–H), 7.20 (td,  $J$  = 8.0, 1.0 Hz, 1H, Ar–H) ppm; <sup>13</sup>C NMR (125 MHz, acetone- $d_6$ ):  $\delta$  = 141.33 (C), 139.55 (C), 128.93 (CH), 127.30 (CH), 125.92 (C), 125.88 (C), 123.60 (CH), 122.93 (C), 121.31 (CH), 120.15 (CH), 113.50 (CH), 111.97 (C) ppm; IR (ATR):  $\tilde{\nu}$  = 3401 (N–H), 2923, 1599, 1444, 1270, 1055, 879, 745  $\text{cm}^{-1}$ ; LCMS (ESI):  $m/z$  calcd. for  $[\text{C}_{12}\text{H}_8\text{BrN-H}]^+$ : 243.97, found: 244.00. TON 22.75 from **3ga** and 22.5 from **3ae**.

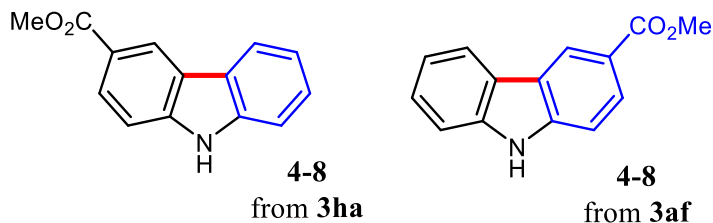

**Methyl 9H-carbazole-3-carboxylate (4-8)**<sup>[1,5]</sup>: Carbazole **4-8** was prepared according to the typical procedure from compound **3ha** or **3af** (141 mg, 0.4 mmol), and purified by column chromatography on silica gel, eluting with hexane/ethyl acetate (85:15). White solid (82 mg, 91% yield from **3ha**, and 81 mg, 90% from **3af**); mp: 174-176 °C (ref.<sup>[5]</sup> 168-170 °C); <sup>1</sup>H NMR (250 MHz, acetone- $d_6$ ):  $\delta$  = 10.79 (brs, 1H, residual N–H), 8.82 (d,  $J$  = 1.5 Hz, 1H, Ar–H), 8.24 (d,  $J$  = 7.7 Hz, 1H, Ar–H), 8.08 (dd,  $J$  = 8.5, 1.5 Hz, 1H, Ar–H), 7.58 (dd,  $J$  = 8.7, 1.2 Hz, 2H, Ar–H), 7.46 (td,  $J$  = 7.7, 1.2 Hz, 1H, Ar–H), 7.26 (td,  $J$  = 7.7, 1.2 Hz, 1H, Ar–H), 3.91 (s, 3H, -CH<sub>3</sub>) ppm; <sup>13</sup>C NMR (62.5 MHz, acetone- $d_6$ ):  $\delta$  = 167.94 (C=O), 143.60 (C), 141.43 (C), 127.79 (CH), 127.27 (CH), 123.87 (C), 123.66 (C), 123.22 (CH), 121.71 (C), 121.28 (CH), 120.64 (CH), 112.10 (CH), 111.35 (CH), 51.99 (CH<sub>3</sub>) ppm; IR (ATR):  $\tilde{\nu}$  = 3325 (N–H), 2982, 1684 (C=O), 1626, 1602, 1431, 1333, 1292, 1260, 1099, 977, 825, 722  $\text{cm}^{-1}$ ; LCMS (ESI):  $m/z$  calcd. for  $[\text{C}_{14}\text{H}_{11}\text{NO}_2+\text{H}]^+$ : 226.08, found: 226.10. TON 22.75 from **3ha** and 22.5 from **3af**.

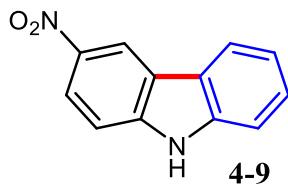

**3-Nitro-9H-carbazole (4-9)**<sup>[1,2]</sup>: Carbazole **4-9** was prepared according to the typical procedure from compound **3ia** (136 mg, 0.4 mmol), and purified by column chromatography on silica gel, eluting with hexane/ethyl acetate (90:10). Yellow solid (81 mg, 95% yield); mp: 212-214 °C (ref.<sup>[1,2]</sup> 214-216 °C); <sup>1</sup>H NMR (500 MHz, CDCl<sub>3</sub>):  $\delta$  = 8.99 (d,  $J$  = 2.0 Hz, 1H, Ar-H), 8.45 (brs, 1H, N-H), 8.34 (dd,  $J$  = 9.0, 2.0 Hz, 1H, Ar-H), 8.13 (d,  $J$  = 8.0 Hz, 1H, Ar-H), 7.53-7.48 (m, 2H, Ar-H), 7.45 (d,  $J$  = 9.0 Hz, 1H Ar-H), 7.34 (td,  $J$  = 8.0, 2.0 Hz, 1H, Ar-H) ppm; <sup>13</sup>C NMR (125 MHz, CDCl<sub>3</sub>):  $\delta$  = 142.72 (C), 141.31 (C), 140.48 (C), 127.64 (CH), 123.21 (C), 123.17 (C), 121.81 (CH), 121.22 (CH), 121.00 (CH), 117.35 (CH), 111.37 (CH), 110.27 (CH) ppm; IR (ATR):  $\tilde{\nu}$  = 3327 (N-H), 2917, 1603, 1524, 1455 (N-O), 1279, 1192, 1083, 813, 720 cm<sup>-1</sup>; LCMS (ESI):  $m/z$  calcd. for [C<sub>12</sub>H<sub>8</sub>N<sub>2</sub>O<sub>2</sub>+H]<sup>+</sup>: 213.06, found: 213.10. TON 23.75.

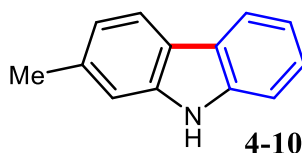

**2-Methyl-9H-carbazole (4-10)**<sup>[1,6]</sup>: Carbazole **4-10** was prepared according to the typical procedure from **3ja** (124 mg, 0.4 mmol), and purified by column chromatography on silica gel, eluting with hexane/ethyl acetate (90:10). White solid (67 mg, 93%); mp: 258-260 °C (ref.<sup>[6]</sup> 261-262 °C); <sup>1</sup>H NMR (500 MHz, CDCl<sub>3</sub>):  $\delta$  = 8.02 (d,  $J$  = 8.0 Hz, 1H, Ar-H), 7.94 (d,  $J$  = 8.0 Hz, 1H, Ar-H), 7.89 (brs, 1H, residual N-H), 7.38-7.36 (m, 2H, Ar-H), 7.20 (td,  $J$  = 8.0, 2.0 Hz, 2H, Ar-H), 7.05 (dd,  $J$  = 8.0, 1.0 Hz, 1H, Ar-H), 2.52 (s, 3H, CH<sub>3</sub>) ppm; <sup>13</sup>C NMR (125 MHz, CDCl<sub>3</sub>):  $\delta$  = 140.19 (C), 139.70 (C), 136.23 (C), 125.49 (CH), 123.69 (C), 121.29 (C), 121.21 (CH), 120.21 (2 CH), 119.56 (CH), 110.94 (CH), 110.68 (CH), 22.26 (CH<sub>3</sub>) ppm; IR (ATR):  $\tilde{\nu}$  = 3396 (N-H), 2915, 1923, 1886, 1605, 1460, 1437, 1326, 1243, 1148, 1016, 864, 806, 744 cm<sup>-1</sup>; LCMS (ESI):  $m/z$  calcd. for [C<sub>13</sub>H<sub>11</sub>N+H]<sup>+</sup>: 182.09, found: 182.10. TON 23.25.

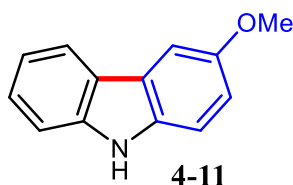

**3-Methoxy-9H-carbazole (4-11)**<sup>[1,2]</sup>: Carbazole **4-11** was prepared according to the typical procedure from compound **3ag** (130 mg, 0.4 mmol), and purified by column chromatography on silica gel (100-200 mesh), eluting with hexane/ethyl acetate (90:10). Off-white solid (75 mg, 95% yield); mp: 146-148 °C (ref.<sup>[2]</sup> 149-151 °C); <sup>1</sup>H NMR (500 MHz, CDCl<sub>3</sub>):  $\delta$  = 8.03 (d,  $J$  = 8.0 Hz, 1H, Ar-H), 7.90 (brs, 1H, N-H), 7.55 (d,  $J$  = 2.5 Hz, 1H, Ar-H), 7.40-7.39 (m,



2H, Ar-H), 7.33 (d,  $J = 9.0$  Hz, 1H, Ar-H), 7.20 (ddd,  $J = 8.0, 5.5, 2.5$  Hz, 1H, Ar-H), 7.06 (dd,  $J = 8.5, 2.5$  Hz, 1H, Ar-H), 3.93 (s, 3H, -CH<sub>3</sub>) ppm; <sup>13</sup>C NMR (125 MHz, CDCl<sub>3</sub>):  $\delta = 153.95$  (C), 140.30 (C), 134.39 (C), 125.80 (CH), 123.83 (C), 123.40 (C), 120.25 (CH), 119.07 (CH), 115.08 (CH), 111.27 (CH), 110.73 (CH), 103.24 (CH), 56.10 (-CH<sub>3</sub>) ppm; IR (ATR):  $\tilde{\nu} = 3397$  (N-H), 2919, 1624, 1585, 1458, 1332, 1283, 1171, 817, 747 cm<sup>-1</sup>; LCMS (ESI):  $m/z$  calcd. for [C<sub>13</sub>H<sub>11</sub>NO+H]<sup>+</sup>: 198.09, found: 198.10. TON 23.75.

According to the typical procedure, reaction of **3ah** (130 mg, 0.4 mmol) produced a mixture of 2-methoxy-9H-carbazole (**4-12**, 24 mg, 30%) and 4-methoxy-9H-carbazole (**4-13**, 49 mg, 62%). Carbazoles **4-12** and **4-13** were collected separately during column chromatography on silica gel, eluting with hexane/ethyl acetate (90:10), from the earlier fractions and later fractions, respectively. Ratio of 2-methoxy-9H-carbazole (**4-12**) and 4-methoxy-9H-carbazole (**4-13**) was found 0.48:1 (C2:C4), from <sup>1</sup>H NMR spectrum of the reaction mixture. Combined yield 92% and TON 23.0.

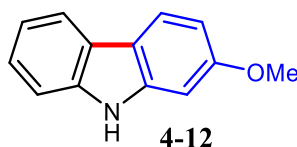

**2-Methoxy-9H-carbazole (4-12)**<sup>[1,7]</sup>: White solid (24 mg, 30%); mp: 234-236 °C (ref.<sup>[7]</sup> 234 °C); <sup>1</sup>H NMR (250 MHz, acetone-d<sub>6</sub>):  $\delta = 10.22$  (brs, 1H, residual N-H), 8.02 (s, 1H, Ar-H), 7.98 (d,  $J = 8.5$  Hz, 1H, Ar-H), 7.46 (d,  $J = 8.0$  Hz, 1H, Ar-H), 7.30 (td,  $J = 7.5, 1.0$  Hz, 1H, Ar-H), 7.14 (t,  $J = 7.5$  Hz, 1H, Ar-H), 7.05 (d,  $J = 2.5$  Hz, 1H, Ar-H), 6.82 (dd,  $J = 8.5, 2.0$  Hz, 1H, Ar-H), 3.88 (s, 3H, -CH<sub>3</sub>) ppm; <sup>13</sup>C NMR (62.5 MHz, acetone-d<sub>6</sub>):  $\delta = 159.18$  (C), 141.34 (C), 139.99 (C), 124.15 (CH), 123.30 (C), 120.69 (CH), 119.11 (CH), 118.81 (CH), 116.80 (C), 110.45 (CH), 107.89 (CH), 94.43 (CH), 54.83 (-CH<sub>3</sub>) ppm; IR (ATR):  $\tilde{\nu} = 3388$  (N-H), 2932, 1600, 1583, 1508, 1455, 1442, 1308, 1262, 1098, 783 cm<sup>-1</sup>; LCMS (ESI):  $m/z$  calcd. for [C<sub>13</sub>H<sub>11</sub>NO+H]<sup>+</sup>: 198.09, found: 198.10.

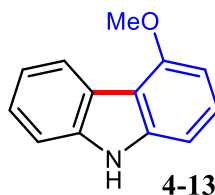

**4-Methoxy-9H-carbazole (4-13)**<sup>[1,7]</sup>: White solid (49 mg, 62%); mp: 136-138 °C (ref.<sup>[7]</sup> 135 °C); <sup>1</sup>H NMR (500 MHz, acetone-d<sub>6</sub>):  $\delta = 8.25$  (d,  $J = 8.0$  Hz, 1H, Ar-H), 7.49 (d,  $J = 8.0$  Hz, 1H, Ar-H), 7.35 (td,  $J = 8.0, 1.0$  Hz, 1H, Ar-H), 7.32 (d,  $J = 8.5$  Hz, 1H, Ar-H), 7.17 (t,  $J = 8.0$  Hz, 1H, Ar-H), 7.12 (d,  $J = 8.0$  Hz, 1H, Ar-H), 6.73 (d,  $J = 7.5$  Hz, 1H, Ar-H), 4.08 (s, 3H, -CH<sub>3</sub>) ppm; <sup>13</sup>C NMR (125 MHz, acetone-d<sub>6</sub>):  $\delta = 156.35$  (C), 141.47 (C), 139.28 (C), 126.41 (CH), 124.47 (CH), 122.67 (CH), 122.53 (C), 118.73 (CH), 112.40 (C), 110.09 (CH), 103.74 (CH), 99.93 (CH), 54.79 (-CH<sub>3</sub>) ppm; IR (ATR):  $\tilde{\nu} = 3389$  (N-H), 2932, 1602, 1583, 1507, 1455, 1436, 1310, 1265, 754 cm<sup>-1</sup>; LCMS (ESI):  $m/z$  calcd. for [C<sub>13</sub>H<sub>11</sub>NO+H]<sup>+</sup>: 198.09, found: 198.00.

According to the typical procedure, reaction of **3ai** (135 mg, 0.4 mmol), produced a mixture of 2-acetylcarbazole (**4-14**, 13 mg, 16%) and 4-acetylcarbazole (**4-15**, 60 mg, 72%). Carbazoles **4-14** and **4-15** were collected separately during column chromatography on silica gel, eluting with hexane/ethyl acetate (85:15), from the later fractions and earlier fractions respectively. Ratio of 2-acetylcarbazole (**4-14**) and 4-acetylcarbazole (**4-15**) was found 0.23:1 (C2:C4), from  $^1\text{H}$  NMR spectrum of the reaction mixture. Combined yield 88% and TON 22.0.

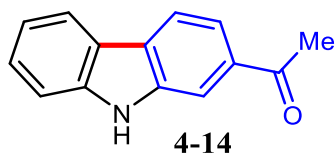

**2-Acetylcarbazole (4-14)** <sup>[1,7,8]</sup>: Pale yellow solid (13 mg, 16%); mp: 230-232 °C (ref.<sup>[8]</sup> 232-234 °C).  $^1\text{H}$  NMR (500 MHz,  $\text{CDCl}_3$ ):  $\delta$  = 8.24 (brs, 1H, N-H), 8.11 (t,  $J$  = 8.0 Hz, 3H, Ar-H), 7.86 (dd,  $J$  = 8.0, 1.0 Hz, 1H, Ar-H), 7.51-7.47 (m, 2H, Ar-H), 7.29-7.26 (m, 1H, Ar-H), 2.71 (s, 3H,  $\text{CH}_3$ ) ppm;  $^{13}\text{C}$  NMR (125 MHz,  $\text{CDCl}_3$ ):  $\delta$  = 198.43 (C=O), 141.24 (C), 139.27 (C), 135.01 (2C), 127.62 (CH), 127.52 (CH), 122.74 (C), 121.42 (CH), 120.28 (2CH), 111.19 (CH), 111.10 (CH), 27.17 ( $\text{CH}_3$ ) ppm; IR (ATR):  $\tilde{\nu}$  = 3317 (N-H), 2921, 1660 (C=O), 1605, 1498, 1440, 1351, 1312, 1258, 1015, 822, 749  $\text{cm}^{-1}$ ; LCMS (ESI):  $m/z$  calcd. for  $[\text{C}_{14}\text{H}_{11}\text{NO-H}]^+$ : 208.07, found: 208.10.

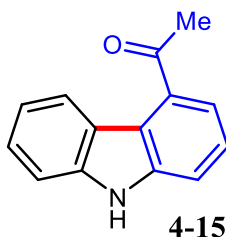

**4-Acetylcarbazole (4-15)** <sup>[8]</sup>: Pale yellow solid (60 mg, 72%); mp: 126-128 °C.  $^1\text{H}$  NMR (500 MHz,  $\text{CDCl}_3$ ):  $\delta$  = 8.74 (d,  $J$  = 8.2 Hz, 1H, Ar-H), 8.29 (brs, 1H, N-H), 7.67 (d,  $J$  = 7.5 Hz, 1H, Ar-H), 7.60 (d,  $J$  = 7.5 Hz, 1H, Ar-H), 7.48-7.41 (m, 3H, Ar-H), 7.25 (dt,  $J$  = 8.2, 1.6 Hz, 1H, Ar-H), 2.80 (s, 3H,  $\text{CH}_3$ ) ppm;  $^{13}\text{C}$  NMR (125 MHz,  $\text{CDCl}_3$ ):  $\delta$  = 201.30 (C=O), 140.39 (C), 140.26 (C), 134.05 (C), 126.95 (CH), 125.52 (CH), 124.72 (CH), 122.17 (C), 121.90 (CH), 120.52 (C), 119.78 (CH), 114.90 (CH), 110.30 (CH), 29.17 ( $\text{CH}_3$ ) ppm; IR (ATR):  $\tilde{\nu}$  = 3245 (N-H), 1664 (C=O), 1602, 1559, 1507, 1458, 1399, 1324, 1268, 1229, 1175, 1116, 992, 792, 722  $\text{cm}^{-1}$ ; LCMS (ESI):  $m/z$  calcd. for  $[\text{C}_{14}\text{H}_{11}\text{NO-H}]^+$ : 208.07, found: 208.00.

According to the typical procedure, reaction of **3aj** (128 mg, 0.4 mmol), produced a mixture of 9H-carbazole-2-carbonitrile (**4-16**, 19 mg, 25%) and 9H-carbazole-4-carbonitrile (**4-17**, 35 mg, 45%). Carbazoles **4-16** and **4-17** were collected separately during column chromatography on silica gel, eluting with hexane/ethyl acetate (85:15), from the earlier and later fractions, respectively. Ratio of 9H-carbazole-2-carbonitrile (**4-16**) and 9H-carbazole-4-carbonitrile (**4-17**) was found 0.62:1 (C2:C4), from  $^1\text{H}$  NMR spectrum of the reaction mixture. Combined yield 70% and TON 17.5.

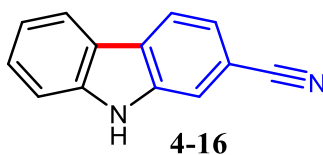

**9H-Carbazole-2-carbonitrile (4-16)**<sup>[1,9]</sup>: Off-white solid (19 mg, 25% yield); mp: 124-126 °C (ref.<sup>[10]</sup> 120-122 °C). <sup>1</sup>H NMR (500 MHz, CDCl<sub>3</sub>):  $\delta$  = 8.28 (brs, 1H, N-H), 8.14 (d,  $J$  = 8.0 Hz, 1H, Ar-H), 8.11 (d,  $J$  = 8.0 Hz, 1H, Ar-H), 7.75 (s, 1H Ar-H), 7.52-7.49 (m, 3H, Ar-H), 7.29 (t,  $J$  = 8.0 Hz, 1H, Ar-H) ppm; <sup>13</sup>C NMR (125 MHz, CDCl<sub>3</sub>):  $\delta$  = 140.79 (C), 138.53 (C), 128.16 (CH), 127.12 (C), 123.06 (CH), 122.46 (C), 121.42 (CH), 121.24 (CH), 120.77 (CH), 120.28 (CN), 114.98 (CH), 111.34 (CH), 108.51 (C) ppm; IR (ATR):  $\tilde{\nu}$  = 3257 (N-H), 2222 (CN), 1631, 1559, 1507, 1451, 1341, 1327, 1244, 861, 740 cm<sup>-1</sup>; LCMS (ESI):  $m/z$  calcd. for [C<sub>13</sub>H<sub>8</sub>N<sub>2</sub>-H]<sup>+</sup>: 191.06, found: 191.00.

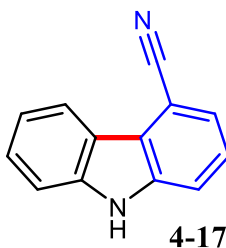

**9H-Carbazole-4-carbonitrile (4-17)**<sup>[1,10]</sup>: White solid (35 mg, 45%); mp: 158-160 °C (ref.<sup>[11]</sup> 156-158 °C). <sup>1</sup>H NMR (500 MHz, acetone-d<sub>6</sub>):  $\delta$  = 8.52 (d,  $J$  = 7.5 Hz, 1H, Ar-H), 7.90 (d,  $J$  = 8.0 Hz, 1H, Ar-H), 7.66 (d,  $J$  = 8.0 Hz, 1H, Ar-H), 7.63 (d,  $J$  = 7.5 Hz, 1H, Ar-H), 7.59 (d,  $J$  = 7.5 Hz, 1H, Ar-H), 7.56 (d,  $J$  = 7.5 Hz, 1H, Ar-H), 7.35 (t,  $J$  = 7.5 Hz, 1H, Ar-H) ppm; <sup>13</sup>C NMR (125 MHz, acetone-d<sub>6</sub>):  $\delta$  = 140.68 (C), 139.90 (C), 127.39 (CH), 125.36 (CH), 123.84 (CH), 122.79 (C), 120.90 (CH), 120.77 (C), 119.78 (CH), 118.42 (CN), 115.74 (CH), 111.46 (CH), 103.42 (C) ppm; IR (ATR):  $\tilde{\nu}$  = 3318 (N-H), 2982, 2924, 2222 (C-N), 1602, 1506, 1459, 1323, 1228, 786, 713 cm<sup>-1</sup>; LCMS (ESI):  $m/z$  calcd. for [C<sub>13</sub>H<sub>8</sub>N<sub>2</sub>-H]<sup>+</sup>: 191.06, found: 191.10.

According to the typical procedure, reaction of **3ak** (118 mg, 0.4 mmol), produced a mixture of  $\beta$ -Carboline or 9H-pyrido[3,4-*b*]indole (**4-18**, 3 mg, 4%) and  $\delta$ -Carboline or 5H-pyrido[3,2-*b*]indole (**4-19**, 50 mg, 75%). Carbazoles **4-18** and **4-19** were collected separately during column chromatography on silica gel, eluting with hexane/ethyl acetate (70:30), from the earlier and later fractions, respectively. Ratio of 9H-pyrido[3,4-*b*]indole (**4-18**) and 5H-pyrido[3,2-*b*]indole (**4-19**) was found 0.02:1 (C2:C4), from LCMS spectrum of the reaction mixture. Combined yield 79% and TON 19.75.

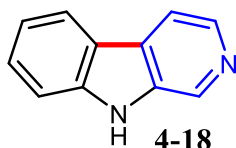

**9H-β-Carboline or 9H-pyrido[3,4-*b*]indole (4-18)**<sup>[1]</sup>: Carbazole **4-18** was prepared from **3ak** (118 mg, 0.4 mmol), and purified by column chromatography on silica gel, eluting with hexane/ethyl acetate (70:30). Yellow solid (3 mg, 4%); mp: 196-198 °C (ref.<sup>[1]</sup> 199-200 °C); <sup>1</sup>H NMR (400 MHz, CDCl<sub>3</sub>): δ = 9.11 (brs, 1H; residual NH), 8.59 (d, *J* = 8.0 Hz, 1H, Ar-H), 8.41 (d, *J* = 8.0 Hz, 1H, Ar-H), 7.79 (d, *J* = 8.0 Hz, 1H, Ar-H), 7.56-7.50 (m, 2H, Ar-H), 7.37-7.30 (m, 2H, Ar-H) ppm; <sup>13</sup>C NMR (125 MHz, CDCl<sub>3</sub>): δ = 141.78 (C), 141.42 (CH), 140.56 (C), 133.17 (C), 128.07 (CH), 122.02 (C), 120.97 (CH), 120.44 (CH), 120.14 (CH), 118.16 (CH), 111.31 (CH) ppm; HRMS (ESI): *m/z* [*M*+H]<sup>+</sup> calcd. for [C<sub>11</sub>H<sub>8</sub>N<sub>2</sub>+H]<sup>+</sup>: 169.0766, found: 169.0776.

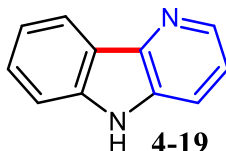

**δ-Carboline or 5H-pyrido[3,2-*b*]indole (4-19)**<sup>[3b]</sup>: Pale yellow solid (50 mg, 75%); mp: 140-142 °C. <sup>1</sup>H NMR (400 MHz, CDCl<sub>3</sub>): δ = 9.57 (brs, 1H, N-H), 9.02 (s, 1H, Ar-H), 8.48 (d, *J* = 4.0 Hz, 1H, Ar-H), 8.16 (d, *J* = 8 Hz, 1H, Ar-H), 8.02 (d, *J* = 4 Hz, 1H, Ar-H), 7.59-7.58 (m, 2H, Ar-H), 7.36-7.31 (m, 1H, Ar-H) ppm; <sup>13</sup>C NMR (125 MHz, CDCl<sub>3</sub>): δ = 140.92 (C), 137.92 (CH), 136.02 (C), 133.01 (CH), 129.46 (C), 128.86 (CH), 121.86 (CH), 121.28 (C), 120.25 (CH), 114.96 (CH), 111.84 (CH); HRMS (ESI): *m/z* [*M*+H]<sup>+</sup> calcd. for [C<sub>11</sub>H<sub>8</sub>N<sub>2</sub>+H]<sup>+</sup>: 169.0766, found: 169.0752.

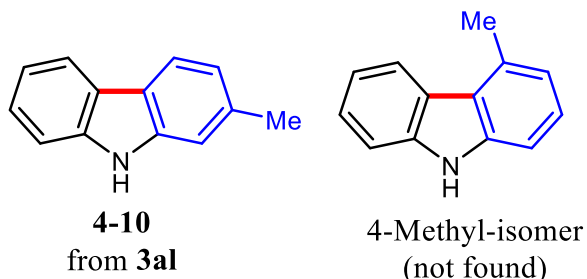

**2-Methyl-9H-carbazole (4-10)**<sup>[1,6]</sup>: Off-white solid (65 mg, 90% from **3al**); mp: 202-204 °C (ref.<sup>[1,2]</sup> 206-208 °C); <sup>1</sup>H NMR (400 MHz, CDCl<sub>3</sub>): δ = 8.01 (d, *J* = 7.7 Hz, 1H, Ar-H), 7.93 (d, *J* = 7.7 Hz, 2H, Ar-H), 7.40-7.34 (m, 2H, Ar-H), 7.22-7.18 (m, 2H, Ar-H), 7.05 (d, *J* = 7.9 Hz, 1H, Ar-H), 2.51 (s, 3H, -CH<sub>3</sub>) ppm; <sup>13</sup>C NMR (125 MHz, CDCl<sub>3</sub>): δ = 139.98 (C), 139.49 (C), 136.03 (C), 125.28 (CH), 123.47 (C), 121.07 (CH), 121.00 (CH), 120.00 (2CH), 119.34 (CH), 110.74 (CH), 110.48 (CH), 22.06 (CH<sub>3</sub>) ppm; LCMS (ESI): *m/z* calcd. for [C<sub>13</sub>H<sub>11</sub>N+H]<sup>+</sup>: 182.09, found: 182.10. TON 22.5.

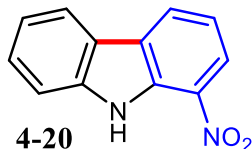

**1-Nitro-9H-carbazole (4-20)**<sup>[1,11]</sup>: Carbazole **4-20** was prepared according to the typical procedure from compound **3am** (136 mg, 0.4 mmol) and purified by column chromatography on silica gel, eluting with hexane/ethyl acetate (95:5). Yellow solid (68 mg, 80% yield); mp: 188-190 °C (ref.<sup>[12]</sup> 186-188 °C); <sup>1</sup>H NMR (500 MHz, CDCl<sub>3</sub>):  $\delta$  = 9.98 (brs, 1H, N-H), 8.33 (d,  $J$  = 7.5 Hz, 1H, Ar-H), 8.31 (dd,  $J$  = 8.0, 1.0 Hz, 1H, Ar-H), 8.08 (d,  $J$  = 8.0 Hz, 1H, Ar-H), 7.56-7.50 (m, 2H, Ar-H), 7.33 (td,  $J$  = 8.0, 1.5 Hz, 1H, Ar-H), 7.28 (t,  $J$  = 8.0 Hz, 1H, Ar-H) ppm; <sup>13</sup>C NMR (125 MHz, CDCl<sub>3</sub>):  $\delta$  = 139.77 (C), 133.73 (C), 132.17 (C), 127.72 (CH), 127.47 (C, CH), 122.25 (C), 121.96 (CH), 121.29 (CH), 120.69 (CH), 118.75 (CH), 111.65 (CH) ppm; IR (ATR):  $\tilde{\nu}$  = 3409 (N-H), 2920, 1490, 1458 (N=O), 1330, 1204, 1066, 804, 725 cm<sup>-1</sup>; LCMS (ESI)  $m/z$  [M-H]<sup>+</sup> calcd. for [C<sub>12</sub>H<sub>8</sub>N<sub>2</sub>O<sub>2</sub>-H]<sup>+</sup>: 211.0507, found: 211.0496. TON 20.0

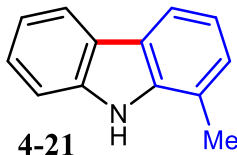

**1-Methyl-9H-carbazole (4-21)**<sup>[1,12]</sup>: Carbazole **4-21** was prepared according to the typical procedure from compound **3an** (124 mg, 0.4 mmol) and purified by column chromatography on silica gel, eluting with hexane/ethyl acetate (95:5). Off-white solid (65 mg, 90%); mp: 124-126 °C (ref.<sup>[13]</sup> 123.5-124.5 °C). <sup>1</sup>H NMR (500 MHz, CDCl<sub>3</sub>):  $\delta$  = 8.07 (d,  $J$  = 7.5 Hz, 1H, Ar-H), 7.98 (brs, 1H, residual N-H), 7.93 (d,  $J$  = 8.0 Hz, 1H, Ar-H), 7.47 (d,  $J$  = 8.0 Hz, 1H, Ar-H), 7.41 (t,  $J$  = 7.5 Hz, 1H, Ar-H), 7.24-7.21 (m, 2H, Ar-H), 7.16 (t,  $J$  = 7.5 Hz, 1H, Ar-H), 2.58 (s, 3H, -CH<sub>3</sub>) ppm; <sup>13</sup>C NMR (125 MHz, CDCl<sub>3</sub>):  $\delta$  = 139.37 (C), 138.82 (C), 126.38 (CH), 125.65 (CH), 123.83 (C), 122.80 (C), 120.46 (CH), 119.69 (C), 119.55 (CH), 119.45 (CH), 117.92 (CH), 110.66 (CH), 16.89 (CH<sub>3</sub>) ppm; IR (ATR):  $\tilde{\nu}$  = 3405, 2960, 2850, 1615, 1457, 1325, 1230, 1120, 750 cm<sup>-1</sup>; LCMS (ESI):  $m/z$  calcd. for [C<sub>13</sub>H<sub>11</sub>N+H]<sup>+</sup>: 182.09; found: 182.20. TON 22.5

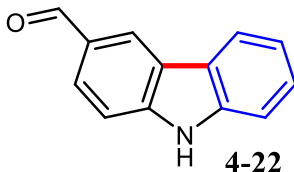

**9H-Carbazole-3-carbaldehyd (4-23)**<sup>[5,13]</sup>: Carbazole **4-23** was prepared from **3ba-1** (129 mg, 0.4 mmol), and purified by column chromatography on silica gel, eluting with hexane/ethyl acetate (85:15). Pale yellow solid (73 mg, 93%); mp: 156-158 °C (Ref. <sup>[5]</sup> 158-159 °C; <sup>1</sup>H NMR (500 MHz, CDCl<sub>3</sub>):  $\delta$  = 10.10 (s, 1H, -CHO), 8.60 (d,  $J$  = 1.0, Hz, 1H,

Ar-H), 8.55 (brs, 1 H, N-H), 8.13 (d,  $J = 8.0$  Hz, 1H, Ar-H), 7.96 (dd,  $J = 8.5, 1.5$  Hz, 1H, Ar-H), 7.51 (d,  $J = 8.5$  Hz, 1H, Ar-H), 7.50-7.49 (m, 2H, Ar-H), 7.34-7.31 (m, 1H, Ar-H);  $^{13}\text{C}$  NMR (125 MHz,  $\text{CDCl}_3$ ):  $\delta = 191.99$  (C=O), 143.29 (C), 139.96 (C), 129.05 (CH), 127.32 (CH), 126.95 (CH), 124.09 (C), 123.53 (C), 123.19 (C), 120.74 (CH), 120.70 (CH), 111.13 (CH), 110.94 (CH) ppm; IR (ATR):  $\tilde{\nu} = 3248, 2826, 1668$  (C=O), 1619, 1496, 1333, 1297, 1118, 1006, 895, 740  $\text{cm}^{-1}$ ; LCMS (ESI):  $m/z$  calcd. for  $\text{C}_{13}\text{H}_9\text{NO} + \text{H}]^+$ : 196.07, found: 196.20. TON 23.25.

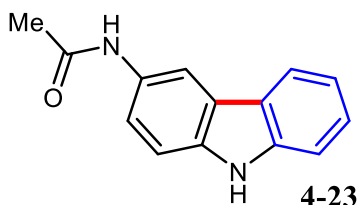

***N*-(9*H*-carbazol-3-yl)acetamide (4-23):** Carbazole **4-23** was prepared from **3ia-1** (141 mg, 0.4 mmol), and purified by column chromatography on silica gel, eluting with hexane/ethyl acetate (85:15). Grey solid (81 mg, 90%); mp: 166-168  $^{\circ}\text{C}$ ;  $^1\text{H}$  NMR (500 MHz,  $\text{CD}_3\text{CN}$ ):  $\delta = 9.30$  (brs, 1H, N-H), 8.37 (brs, 1H, N-H), 8.32 (s, 1H, Ar-H), 8.04 (d,  $J = 8.0$  Hz, 1H, Ar-H), 7.49-7.38 (m, 4H, Ar-H), 7.17 (td,  $J = 7.5, 0.5$  Hz, 1H, Ar-H), 2.09 (s, 3H, -CH<sub>3</sub>) ppm;  $^{13}\text{C}$  NMR (125 MHz,  $\text{CDCl}_3$ ):  $\delta = 169.33$  (C), 141.49 (C), 137.64 (C), 132.27 (C), 126.86 (CH), 123.81 (C), 123.74 (C), 121.15 (CH), 120.30 (CH), 119.87 (CH), 112.52 (CH), 112.00 (CH), 111.83 (CH), 24.26 (CH<sub>3</sub>) ppm; IR (ATR):  $\tilde{\nu} = 3413, 3231, 3060, 2921, 2850, 1643$  (C=O), 1540, 1453, 1369, 1239, 1183, 1002, 877, 752  $\text{cm}^{-1}$ ; HRMS (ESI):  $m/z$  calcd. for  $[\text{C}_{14}\text{H}_{12}\text{N}_2\text{O} + \text{H}]^+$ : 225.1028, found: 225.1019. TON 22.5.

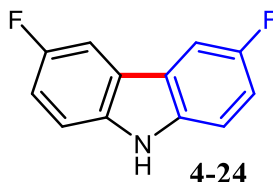

**3,6-Difluoro-9*H*-carbazole (4-24)**<sup>[14]</sup>: Carbazole **4-24** was prepared according to the typical procedure from compound **3ec** (132 mg, 0.4 mmol) and purified by column chromatography on silica gel, eluting with hexane/ethyl acetate (90:10). White solid (79 mg, 97%); mp: 198-200  $^{\circ}\text{C}$  (ref.<sup>[15]</sup> 198-200  $^{\circ}\text{C}$ );  $^1\text{H}$  NMR (500 MHz,  $\text{CDCl}_3$ ):  $\delta = 7.97$  (s, brs, 1H, N-H), 7.65 (dd,  $J = 9.0, 3.0$  Hz, 2H, Ar-H), 7.33 (dd,  $J = 8.5, 4.0$  Hz, 2H, Ar-H), 7.19-7.15 (m, 2H, Ar-H) ppm;  $^{13}\text{C}$  NMR (125 MHz,  $\text{CDCl}_3$ ):  $\delta = 157.29$  (d,  $J_{\text{CF}} = 234.6$  Hz, 2C), 136.75 (2C), 123.49 (q,  $J_{\text{CF}} = 5.3$  Hz, 2C), 114.36 (d,  $J_{\text{CF}} = 25.3$  Hz, 2CH), 111.45 (d,  $J_{\text{CF}} = 9.0$  Hz, 2CH), 106.09 (d,  $J_{\text{CF}} = 23.3$  Hz, 2CH) ppm; IR (ATR):  $\tilde{\nu} = 3420$  (N-H), 3090, 2922, 1863, 1736, 1578, 1464, 1293, 1271, 1240, 1183, 1135, 1013, 948, 807, 715, 593  $\text{cm}^{-1}$ ; LCMS (ESI):  $m/z$  calcd. for  $[\text{C}_{12}\text{H}_7\text{F}_2\text{N} + \text{H}]^+$ : 204.06; found: 204.20. TON 24.25.

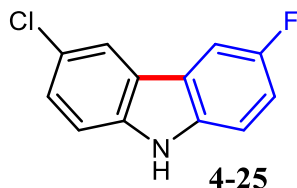

**3-Chloro-6-fluoro-9H-carbazole (4-25)**<sup>[15]</sup>: Carbazole **4-25** was prepared according to the typical procedure from compound **3fc** (139 mg, 0.4 mmol) and purified by column chromatography on silica gel, eluting with hexane/ethyl acetate (90:10). White solid (83 mg, 95%); mp: 230-232 °C; <sup>1</sup>H NMR (500 MHz, CDCl<sub>3</sub>):  $\delta$  = 8.05 (brs, 1H, N-H), 7.97 (s, 1H, Ar-H), 7.66 (dd,  $J$  = 8.9, 2.5 Hz, 1H, Ar-H), 7.39-7.34 (m, 3H, Ar-H), 7.18 (td,  $J$  = 9.0, 2.5 Hz, 1H, Ar-H) ppm; <sup>13</sup>C NMR (125 MHz, CDCl<sub>3</sub>):  $\delta$  = 157.55 (d,  $J_{CF}$  = 234.6, Hz, C), 138.72 (C), 136.27 (C), 126.56 (CH), 124.94 (C), 124.22 (d,  $J_{CF}$  = 4.5 Hz, C), 122.98 (d,  $J$  = 9.8 Hz, C), 120.26 (CH), 114.51 (d,  $J_{CF}$  = 25.2 Hz, CH), 111.85 (CH), 111.45 (d,  $J_{CF}$  = 9.0 Hz, CH), 106.14 (d,  $J_{CF}$  = 25.5 Hz, CH) ppm; IR (ATR):  $\tilde{\nu}$  = 3425 (N-H), 3095, 2929, 1854, 1732, 1606, 1570, 1468, 1428, 1291, 1275, 1231, 1140, 1000, 930, 845, 728 cm<sup>-1</sup>; LCMS (ESI):  $m/z$  calcd. for [C<sub>12</sub>H<sub>7</sub>ClFN+H]<sup>+</sup>: 220.03, found: 220.20. TON 23.75.

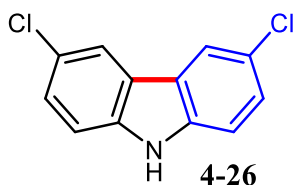

**3,6-Dichloro-9H-carbazole (4-26)**<sup>[14]</sup>: Carbazole **4-26** was prepared according to the typical procedure from compound **3fd** (146 mg, 0.4 mmol) and purified by column chromatography on silica gel, eluting with hexane/ethyl acetate (90:10). Off-white solid (87 mg, 92%); mp: 202-204 °C (ref.<sup>[15]</sup> 202.0-202.5 °C). <sup>1</sup>H NMR (500 MHz, CDCl<sub>3</sub>):  $\delta$  = 8.10 (brs, 1H, N-H), 7.97 (s, 2H, Ar-H), 7.40-7.34 (m, 4H, Ar-H) ppm; <sup>13</sup>C NMR (125 MHz, CDCl<sub>3</sub>):  $\delta$  = 138.22 (2C), 126.68 (2CH), 125.31 (2C), 123.64 (2C), 120.22 (2CH), 111.80 (2CH) ppm; IR (ATR):  $\tilde{\nu}$  = 3425 (N-H), 3095, 2925, 1732, 1606, 1570, 1468, 1428, 1275, 1140, 1001, 845, 803, 769, 728, 603 cm<sup>-1</sup>; LCMS (ESI):  $m/z$  calcd. for [C<sub>12</sub>H<sub>7</sub>Cl<sub>2</sub>N+H]<sup>+</sup>: 236.00; found: 236.30. TON 23.0

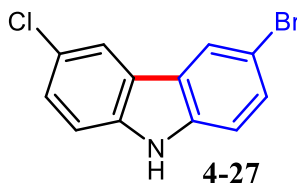

**3-Bromo-6-chloro-9H-carbazole (4-27)**<sup>[11]</sup>: Carbazole **4-27** was prepared according to the typical procedure from **3fe** (163 mg, 0.4 mmol), and purified by column chromatography on silica gel, eluting with hexane/ethyl acetate (90:10). Off-white solid (101 mg, 90%); mp: 188-190 °C (ref.<sup>[11]</sup> 188-190 °C); <sup>1</sup>H NMR (500 MHz, CDCl<sub>3</sub>):  $\delta$  = 8.11 (s, 1H, Ar-H), 8.09 (brs, 1H, residual N-H), 7.95 (s, 1H, Ar-H), 7.50 (dd,  $J$  = 8.5, 2.0 Hz, 1H, Ar-H), 7.37 (dd,  $J$  = 8.5, 2.0

Hz, 1H, Ar-H), 7.32 (d,  $J = 8.5$  Hz, 1H, Ar-H), 7.28 (d,  $J = 8.5$  Hz, 1H, Ar-H) ppm;  $^{13}\text{C}$  NMR (125 MHz,  $\text{CDCl}_3$ ):  $\delta = 138.80$  (C), 138.29 (C), 129.51 (CH), 126.95 (CH), 125.64 (C), 124.50 (C), 123.75 (C), 123.50 (CH), 120.45 (CH), 112.81 (C), 112.47 (CH), 112.00 (CH) ppm; IR (ATR):  $\tilde{\nu} = 3406$  (N-H), 2918, 2849, 2358, 1684, 1653, 1559, 1507, 1436, 1287, 1071, 1020, 967, 869, 804  $\text{cm}^{-1}$ ; LCMS (ESI):  $m/z$  calcd. for  $[\text{C}_{12}\text{H}_7\text{BrClN-H}]^+$ : 277.93, found: 277.90. TON 22.5

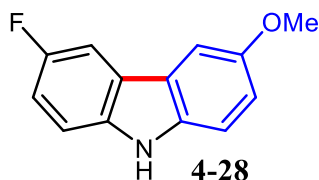

**3-Fluoro-6-methoxy-9H-carbazole (4-28)**<sup>[1]</sup>: Carbazole **4-28** was prepared according to the typical procedure from compound **3eg** (137 mg, 0.4 mmol) and purified by column chromatography on silica gel, eluting with hexane/ethyl acetate (85:15). White solid (85 mg, 99% yield); mp: 136-138 °C (ref.<sup>[1]</sup> 136-138 °C);  $^1\text{H}$  NMR (500 MHz,  $\text{CDCl}_3$ ):  $\delta = 7.85$  (brs, 1H, N-H), 7.66 (dd,  $J = 9.0, 2.5$  Hz, 1H, Ar-H), 7.47 (d,  $J = 2.5$  Hz, 1H, Ar-H), 7.31 (d,  $J = 8.5$  Hz, 1H, Ar-H), 7.30 (dd,  $J = 9.0, 4.0$  Hz, 1H, Ar-H), 7.13 (td,  $J = 9.0, 2.5$  Hz, 1H, Ar-H), 7.08 (dd,  $J = 9.0, 2.5$  Hz, 1H, Ar-H), 3.91 (s, 3H, -CH<sub>3</sub>) ppm;  $^{13}\text{C}$  NMR (125 MHz,  $\text{CDCl}_3$ ):  $\delta = 157.25$  (d,  $J_{\text{CF}} = 235.2$  Hz; C), 153.87 (C), 136.57 (C), 135.46 (C), 123.82 (d,  $J_{\text{CF}} = 9.5$  Hz; C), 123.51 (d,  $J_{\text{CF}} = 4.1$  Hz; C), 115.97 (CH), 113.63 (d,  $J_{\text{CF}} = 25.4$  Hz; CH), 111.64 (CH), 111.27 (d,  $J_{\text{CF}} = 9.1$  Hz; CH), 105.80 (d,  $J_{\text{CF}} = 23.6$  Hz; CH), 103.07 (CH), 56.07 (CH<sub>3</sub>) ppm; IR (ATR):  $\tilde{\nu} = 3416$  (N-H), 2982, 1577, 1495, 1462, 1200, 1145, 1025, 942, 843, 806, 781  $\text{cm}^{-1}$ ; LCMS (ESI):  $m/z$  calcd. for  $[\text{C}_{13}\text{H}_{10}\text{FNO-H}]^+$ : 214.06, found: 214.00. TON 24.75

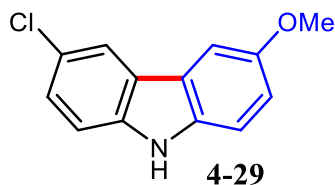

**3-Chloro-6-methoxy-9H-carbazole (4-29)**<sup>[1]</sup>: Carbazole **4-29** was prepared according to the typical procedure from **3fg** (144 mg, 0.4 mmol), and purified by column chromatography on silica gel, eluting with hexane/ethyl acetate (85:15). White solid (86 mg, 93%); mp: 162-164 °C (ref.<sup>[1]</sup> 162-164 °C);  $^1\text{H}$  NMR (500 MHz,  $\text{CDCl}_3$ ):  $\delta = 7.98$  (d,  $J = 2.0$  Hz, 1H, Ar-H), 7.90 (brs, 1H, N-H), 7.48 (d,  $J = 2.5$  Hz, 1H, Ar-H), 7.34-7.25 (m, 3H, Ar-H), 7.08 (dd,  $J = 9.0, 2.5$  Hz, 1H, Ar-H), 3.91 (s, 3H, -CH<sub>3</sub>);  $^{13}\text{C}$  NMR (125 MHz,  $\text{CDCl}_3$ ):  $\delta = 154.12$  (C), 138.48 (C), 134.90 (C), 125.85 (CH), 124.53 (2C), 122.94 (C), 119.96 (CH), 116.04 (CH), 111.68 (CH), 111.58 (CH), 103.04 (CH), 56.04 (CH<sub>3</sub>) ppm; IR (ATR):  $\tilde{\nu} = 3413$  (N-H), 2960, 1490, 1450, 1227, 1167, 1030, 838, 809, 735  $\text{cm}^{-1}$ ; LCMS (ESI):  $m/z$  calcd. for  $[\text{C}_{13}\text{H}_{10}\text{ClNO-H}]^+$ : 230.03, found: 230.00. TON 23.25.



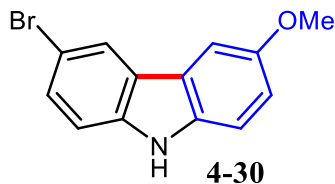

**3-Bromo-6-methoxy-9H-carbazole (4-30)**<sup>[1]</sup>: Carbazole **4-30** was prepared according to the typical procedure from **3gg** (162 mg, 0.4 mmol), and purified by column chromatography on silica gel, eluting with hexane/ethyl acetate (85:15). White solid (99 mg, 90%); mp: 132-134 °C (ref.<sup>[1]</sup> 132-134 °C); <sup>1</sup>H NMR (500 MHz, CDCl<sub>3</sub>):  $\delta$  = 8.12 (d,  $J$  = 2.0 Hz, 1H, Ar-H), 7.91 (brs, 1H, N-H), 7.46 (t,  $J$  = 2.5 Hz, 1H, Ar-H), 7.44 (d,  $J$  = 2.0 Hz, 1H, Ar-H), 7.31 (d,  $J$  = 9.0 Hz, 1H, Ar-H), 7.26 (d,  $J$  = 8.5 Hz, 1H, Ar-H), 7.07 (dd,  $J$  = 9.0, 2.5 Hz, 1H, Ar-H), 3.90 (s, 3H, -CH<sub>3</sub>); <sup>13</sup>C NMR (125 MHz, CDCl<sub>3</sub>):  $\delta$  = 154.20 (C), 138.81 (C), 134.72 (C), 128.46 (CH), 125.19 (C), 123.02 (CH), 122.84 (C), 116.12 (CH), 112.16 (CH), 111.82 (C), 111.58 (CH), 103.04 (CH), 56.05 (CH<sub>3</sub>) ppm; IR (ATR):  $\tilde{\nu}$  = 3385 (N-H), 2922, 2363, 1839, 1576, 1462, 1436, 1274, 1202, 1165, 1030, 906, 874, 789 cm<sup>-1</sup>; LCMS (ESI):  $m/z$  calcd. for [C<sub>13</sub>H<sub>10</sub>BrNO-H]<sup>+</sup>: 273.98, found: 274.00. TON 22.5.

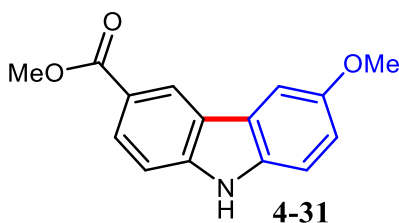

**Methyl 6-methoxy-9H-carbazole-3-carboxylate (4-31)**<sup>[1,5]</sup>: Carbazole **4-31** was prepared according to the typical procedure from compound **3hg** (153 mg, 0.4 mmol) and purified by column chromatography on silica gel, eluting with hexane/ethyl acetate (80:20). White solid (85 mg, 83% yield); mp: 146-148 °C (ref.<sup>[5]</sup> 147-149 °C); <sup>1</sup>H NMR (500 MHz, CDCl<sub>3</sub>):  $\delta$  = 8.77 (d,  $J$  = 1.0 Hz, 1H, Ar-H), 8.17 (brs, 1H, N-H), 8.11 (dd,  $J$  = 8.5, 2.0 Hz, 1H, Ar-H), 7.60 (d,  $J$  = 2.5 Hz, 1H, Ar-H), 7.40 (d,  $J$  = 8.5 Hz, 1H, Ar-H), 7.35 (d,  $J$  = 9.0 Hz, 1H, Ar-H), 7.10 (dd,  $J$  = 9.0, 2.5 Hz, 1H, Ar-H), 3.97 (s, 3H, -CH<sub>3</sub>), 3.93 (s, 3H, -CH<sub>3</sub>) ppm; <sup>13</sup>C NMR (125 MHz, CDCl<sub>3</sub>):  $\delta$  = 167.87 (C=O), 154.56 (C), 142.92 (C), 134.65 (C), 127.34 (CH), 123.89 (C), 123.14 (C), 122.93 (CH), 121.04 (C), 115.98 (CH), 111.65 (CH), 110.25 (CH), 103.24 (CH), 56.02 (CH<sub>3</sub>), 51.94 (CH<sub>3</sub>) ppm; IR (ATR):  $\tilde{\nu}$  = 3301 (N-H), 2951, 2828, 1701 (C=O), 1604, 1472, 1430, 1265, 1033, 801, 722 cm<sup>-1</sup>; LCMS (ESI):  $m/z$  calcd. for [C<sub>15</sub>H<sub>13</sub>NO<sub>3</sub>+H]<sup>+</sup>: 256.09, found: 256.00. TON 20.75.

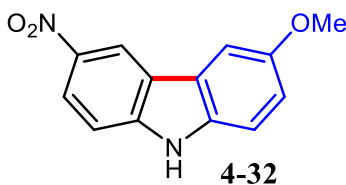

**3-Nitro-6-methoxy-9H-carbazole (4-32)**<sup>[1]</sup>: Carbazole **4-32** was prepared according to the typical procedure from **3ig** (148 mg, 0.4 mmol), and purified by column chromatography on silica gel, eluting with hexane/ethyl acetate (85:15). Yellow solid (88 mg, 91%); mp: 180-182 °C (ref.<sup>[1]</sup> 132-134 °C); <sup>1</sup>H NMR (500 MHz, CDCl<sub>3</sub>):  $\delta$  = 8.96 (d,  $J$  = 2.0 Hz, 1H, Ar-H), 8.31 (dd,  $J$  = 9.0, 2.0 Hz, 1H, Ar-H, and 1H, residual N-H), 7.58 (d,  $J$  = 2.5 Hz, 1H, Ar-H), 7.41 (d,  $J$  = 9.0 Hz, 1H, Ar-H), 7.39 (d,  $J$  = 9.0 Hz, 1H, Ar-H), 7.14 (dd,  $J$  = 8.5, 2.5 Hz, 1H, Ar-H), 3.93 (s, 3H, -CH<sub>3</sub>) ppm; <sup>13</sup>C NMR (125 MHz, CDCl<sub>3</sub>):  $\delta$  = 155.29 (C), 143.45 (C), 141.14 (C), 135.32 (C), 123.97 (C), 123.29 (C), 121.83 (CH), 117.61 (CH), 117.37 (CH), 112.37 (CH), 110.56 (CH), 103.51 (CH), 56.23 ppm (CH<sub>3</sub>); IR (ATR):  $\tilde{\nu}$  = 3346 (N-H), 2825, 1636, 1609, 1590, 1491, 1478 (N=O), 1294, 1197, 1170, 1077, 1035, 725 cm<sup>-1</sup>; LCMS (ESI):  $m/z$  calcd. for [C<sub>13</sub>H<sub>10</sub>N<sub>2</sub>O<sub>3</sub>-H]<sup>+</sup>: 241.06, found: 241.00. TON 22.75.

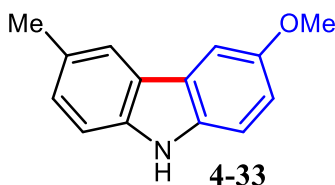

**3-Methoxy-6-methyl-9H-carbazole (4-33, Glycozoline)**: Carbazole **4-33** was prepared according to the typical procedure from **3bg** (136 mg, 0.4 mmol), and purified by column chromatography on silica gel, eluting with hexane/ethyl acetate (95:5). Off-white solid (80 mg, 95%); mp: 180-182 °C (ref.<sup>[15]</sup> 181-182 °C); <sup>1</sup>H NMR (500 MHz, CDCl<sub>3</sub>):  $\delta$  = 7.82 (s, 1H, Ar-H), 7.79 (brs, 1H, N-H), 7.52 (s, 1H, Ar-H), 7.29-7.20 (m, 3H, Ar-H), 7.03 (dd,  $J$  = 8.5, 2.0 Hz, 1H, Ar-H), 3.91 (s, 3H, -OCH<sub>3</sub>), 2.51 (s, 3H, Ar-CH<sub>3</sub>) ppm; <sup>13</sup>C NMR (125 MHz, CDCl<sub>3</sub>):  $\delta$  = 153.70 (C), 138.52 (C), 134.72 (C), 128.31 (C), 127.16 (CH), 123.62 (C), 123.50 (C), 120.11 (CH), 114.85 (CH), 111.25 (CH), 111.40 (CH), 103.05 (CH), 56.05 (-OCH<sub>3</sub>), 21.41 (CH<sub>3</sub>) ppm; IR (ATR):  $\tilde{\nu}$  = 3325 (N-H), 2928, 2831, 1710, 1605, 1560, 1470, 1255, 1040, 800 cm<sup>-1</sup>; LCMS (ESI):  $m/z$  calcd. for [C<sub>14</sub>H<sub>13</sub>ON+H]<sup>+</sup>: 212.10; found: 212.20. TON 23.75.

**Gram-scale reaction of 3bg**: Following the general procedure under microwave-assisted heating condition in water, reaction of 2-iodo-*N*-(4-methoxyphenyl)-4-methylaniline **3bg** (1.0 g, 2.95 mmol) was done with the addition of Pd(OAc)<sub>2</sub> (26.5 mg, 0.118 mmol), CTAB (108 mg, 0.295 mmol), DBU (900 mg, 5.9 mmol), and water (7 ml) in a microwave vial. The reaction was performed under the optimized condition at 100 °C for 60 min. Product 3-methoxy-6-methyl-9H-carbazole **4-33** (505 mg, 81% yield, off-white solid) was collected through column chromatography on silica gel, eluting with hexane/ethyl acetate (95:5).

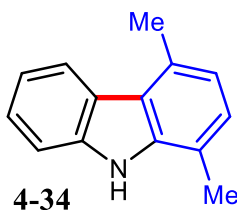

**1,4-Dimethyl-9H-carbazole (4-34)**<sup>[16]</sup>: Carbazole **4-34** was prepared according to the typical procedure from **3ao** (129 mg, 0.4 mmol), and purified by column chromatography on silica gel, eluting with hexane/ethyl acetate (95:5).

Brown solid (69 mg, 88%); mp: 178-180 °C. <sup>1</sup>H NMR (500 MHz, CDCl<sub>3</sub>): δ = 8.17 (d, *J* = 8.0, 1H, Ar-H), 7.99 (brs, 1H, N-H), 7.48 (d, *J* = 8.0 Hz, 1H, Ar-H), 7.41 (t, *J* = 7.5 Hz, 1H, Ar-H), 7.26-7.23 (m, 1H, Ar-H), 7.13 (d, *J* = 7.3 Hz, 1H, Ar-H), 6.93 (d, *J* = 7.1 Hz, 1H, Ar-H), 2.85 (s, 3H, Ar-CH<sub>3</sub>), 2.53 (s, 3H, Ar-CH<sub>3</sub>) ppm; <sup>13</sup>C NMR (125 MHz, CDCl<sub>3</sub>): δ = 139.34 (C), 138.73 (C), 130.84 (C), 126.13 (CH), 125.01 (CH), 124.47 (C), 122.56 (CH), 121.35 (C), 120.85 (CH), 119.39 (CH), 116.94 (C), 110.44 (CH), 20.51 (CH<sub>3</sub>), 16.59 (CH<sub>3</sub>) ppm; IR (ATR):  $\tilde{\nu}$  = 3430 (N-H), 3045, 2953, 1590, 1550, 1460, 1380, 1300, 158, 1120, 1039, 1008, 892, 733 cm<sup>-1</sup>; LCMS (ESI): *m/z* calcd. for [C<sub>14</sub>H<sub>13</sub>N+H]<sup>+</sup>: 196.11, found: 196.20. TON 22.0.

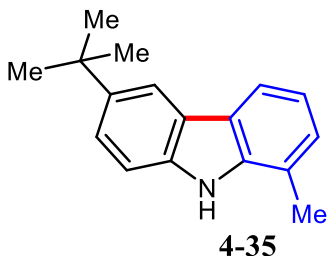

**6-(*tert*-Butyl)-1-methyl-9H-carbazole (4-35):** Carbazole **4-35** was prepared according to the typical procedure from **3cn** (146 mg, 0.4 mmol), and purified by column chromatography on silica gel, eluting with hexane/ethyl acetate (95:5). Off-white solid (71 mg, 75%); mp: 134-136 °C; <sup>1</sup>H NMR (500 MHz, CDCl<sub>3</sub>): δ = 8.05 (s, 1H, Ar-H), 7.92 (d, *J* = 8.0 Hz, 1H, Ar-H), 7.86 (brs, 1H, N-H), 7.47 (d, *J* = 8.0 Hz, 1H, Ar-H), 7.39 (d, *J* = 8.5 Hz, 1H, Ar-H), 7.20 (d, *J* = 8.0 Hz, 1H, Ar-H), 7.14 (t, *J* = 7.5 Hz, 1H, Ar-H), 2.55 (s, 3H, Ar-CH<sub>3</sub>), 1.44 (s, 9H, Ar-C (CH<sub>3</sub>)<sub>3</sub>) ppm; <sup>13</sup>C NMR (125 MHz, CDCl<sub>3</sub>): δ = 142.47 (C), 139.25 (C), 137.48 (C), 126.12 (CH), 123.64 (CH), 123.54 (C), 123.06 (C), 119.60 (C), 119.30 (CH), 117.74 (CH), 116.49 (CH), 110.11 (CH), 34.67 (C), 31.99 (Ar-C(CH<sub>3</sub>)<sub>3</sub>), 16.89 (-CH<sub>3</sub>) ppm; IR (ATR):  $\tilde{\nu}$  = 3344 (N-H), 2825, 1636, 1609, 1590, 1491, 1294, 800 cm<sup>-1</sup>; HRMS (ESI): *m/z* calcd. for [C<sub>17</sub>H<sub>19</sub>N-H]<sup>+</sup>: 236.1439; found: 236.1436. TON 18.75.

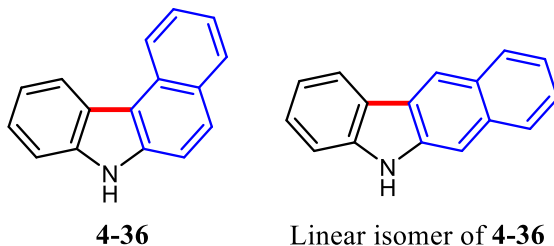

(**4-36** : Linear isomer of **4-36** = 1 : 0)

**7H-benzo[c]carbazole (4-36)**<sup>[17]</sup>: According to the typical procedure, reaction of **3ap** (138 mg, 0.4 mmol), produced **7H-benzo[c]carbazole (4-36)** exclusively, without any **5H-benzo[b]carbazole**<sup>[4]</sup> (linear isomer of **4-36**). Carbazole **4-36** was purified by column chromatography on silica gel, eluting with hexane/ethyl acetate (90:10). Off-white solid (69 mg, 80%); mp: 134-136 °C (ref.<sup>[18]</sup> 133-134 °C); <sup>1</sup>H NMR (500 MHz, CDCl<sub>3</sub>): δ = 8.78 (d, *J* = 8.0 Hz, 1H, Ar-H), 8.57 (d, *J* = 7.5 Hz, 1H, Ar-H) 8.42 (brs, 1H, N-H), 8.00 (d, *J* = 7.5 Hz, 1H, Ar-H), 7.86 (d, *J* = 8.0 Hz, 1H, Ar-H), 7.70-7.69 (m, 1H, Ar-H), 7.63-7.56 (m, 2H, Ar-H), 7.49-7.44 (m, 2H, Ar-H), 7.40-7.37 (m, 1H, Ar-H) ppm; <sup>13</sup>C NMR (125 MHz, CDCl<sub>3</sub>): δ = 138.41 (C), 137.03 (C), 129.90 (2C), 129.18 (CH), 127.41 (CH), 126.85 (CH), 124.32

(CH), 123.99 (C), 123.24 (CH), 122.98 (CH), 122.03 (CH), 120.22 (CH), 115.45 (C), 112.55 (CH), 111.10 (CH) ppm; IR (ATR):  $\tilde{\nu}$  = 3356 (N–H), 2925, 1870, 1478, 1270, 1130, 1077, 801  $\text{cm}^{-1}$ ; LCMS (ESI):  $m/z$  calcd. for  $[\text{C}_{16}\text{H}_{11}\text{N-H}]^+$ : 216.08, found: 216.20. TON 20.0.

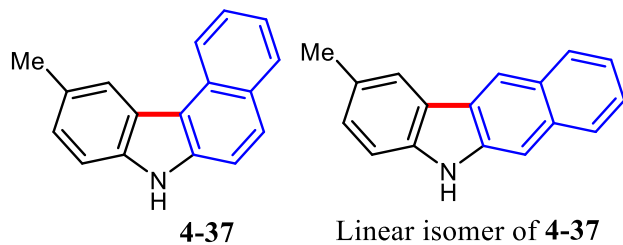

(**4-37** : Linear isomer of **4-37** = 1 : 0)

**10-Methyl-7H-benzo[c]carbazole(4-37)**<sup>[18]</sup>: According to the typical procedure, reaction of **3bp** (144 mg, 0.4 mmol), produced 10-methyl-7H-benzo[c]carbazole (**4-37**) exclusively, without any 2-methyl-5H-benzo[b]carbazole (linear isomer of **4-37**). Carbazole **4-37** was purified by column chromatography on silica gel, eluting with hexane/ethyl acetate (90:10). Off-white solid (72 mg, 78%); mp: 180-182 °C; <sup>1</sup>H NMR (500 MHz,  $\text{CDCl}_3$ ):  $\delta$  = 8.77 (d,  $J$  = 8.5 Hz, 1H, Ar–H), 8.35 (s, 1H, Ar–H), 8.33 (brs, 1H, N–H), 7.99 (d,  $J$  = 8.0 Hz, 1H, Ar–H), 7.83 (d,  $J$  = 8.5 Hz, 1H, Ar–H), 7.70 (t,  $J$  = 7.0 Hz, 1H, Ar–H), 7.60 (d,  $J$  = 8.5 Hz, 1H, Ar–H), 7.48-7.45 (m, 2H, Ar–H), 7.28 (d,  $J$  = 8.0 Hz, 1H, Ar–H), 2.63 (s, 3H, –CH<sub>3</sub>) ppm; <sup>13</sup>C NMR (125 MHz,  $\text{CDCl}_3$ ):  $\delta$  = 137.29 (C), 136.67 (C), 129.98 (C), 129.49 (2C), 129.13 (CH), 127.18 (CH), 126.74 (CH), 125.74 (CH), 124.20 (C), 123.26 (CH), 122.84 (CH), 121.96 (CH), 115.19 (C), 112.62 (CH), 110.71 (CH), 21.82 (CH<sub>3</sub>) ppm; IR (ATR):  $\tilde{\nu}$  = 3466 (N–H), 2895, 1696, 1545, 1265, 1150, 1035, 825  $\text{cm}^{-1}$ ; LCMS (ESI):  $m/z$  calcd. for  $[\text{C}_{17}\text{H}_{13}\text{N-H}]^+$ : 230.09, found: 230.20. TON 19.5.

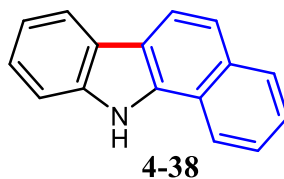

**11H-benzo[a]carbazole (4-38)**<sup>[19]</sup>: Carbazole **4-38** was prepared according to the typical procedure from **3aq** (138 mg, 0.4 mmol), and purified by column chromatography on silica gel, eluting with hexane/ethyl acetate (90:10). Brown solid (73 mg, 84%); mp: 226-228 °C (Ref:<sup>[20]</sup> 224-226 °C); <sup>1</sup>H NMR (500 MHz,  $\text{CDCl}_3$ ):  $\delta$  = 8.79 (brs, 1H, N–H), 8.15-8.12 (m, 3H, Ar–H), 8.01 (d,  $J$  = 8.0 Hz, 1H, Ar–H), 7.66 (d,  $J$  = 8.5 Hz, 1H, Ar–H), 7.61-7.58 (m, 2H, Ar–H), 7.53 (t,  $J$  = 7.5 Hz, 1H, Ar–H), 7.44 (t,  $J$  = 7.0 Hz, 1H, Ar–H), 7.31 (t,  $J$  = 7.0 Hz, 1H, Ar–H) ppm; <sup>13</sup>C NMR (125 MHz,  $\text{CDCl}_3$ ):  $\delta$  = 138.46 (C), 134.87 (C), 132.43 (C), 129.06 (CH), 125.57 (CH), 125.23 (CH), 124.88 (CH), 124.19 (C), 121.09 (C), 120.47 (CH), 120.22 (CH), 119.99 (CH), 119.92 (CH), 119.34 (CH), 118.44 (C), 111.04 (CH) ppm; IR (ATR):  $\tilde{\nu}$  = 3415 (N–H), 3035, 1625, 1605, 1197, 995, 720  $\text{cm}^{-1}$ ; LCMS (ESI):  $m/z$  calcd. for  $[\text{C}_{16}\text{H}_{11}\text{N-H}]^+$ : 216.09, found: 216.20. TON 21.0.

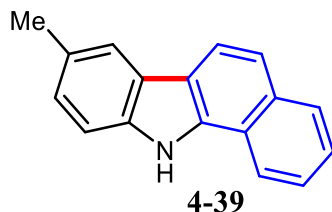

**8-Methyl-11H-benzo[*a*]carbazole (4-39)**<sup>[19]</sup>: Carbazole **4-39** was prepared according to the typical procedure from **3bq** (144 mg, 0.4 mmol), and purified by column chromatography on silica gel, eluting with hexane/ethyl acetate (90:10). Off-white solid (75 mg, 81%); mp: 250-252 °C (Ref:<sup>[20]</sup> 250-252 °C). <sup>1</sup>H NMR (500 MHz, CDCl<sub>3</sub>):  $\delta$  = 8.69 (brs, 1H, N–H), 8.12-8.09 (m, 2H, Ar–H), 8.00 (d, *J* = 8.0 Hz, 1H, Ar–H), 7.92 (s, 1H, Ar–H), 7.64 (d, *J* = 8.5 Hz, 1H, Ar–H), 7.58 (td, *J* = 7.0, 1.0 Hz, 1H, Ar–H), 7.52 (td, *J* = 7.0, 1.0 Hz, 1H, Ar–H), 7.48 (d, *J* = 8.0 Hz, 1H, Ar–H), 7.27 (d, *J* = 1.0 Hz, 1H, Ar–H), 2.56 (s, 3H, Ar–CH<sub>3</sub>) ppm; <sup>13</sup>C NMR (125 MHz, CDCl<sub>3</sub>):  $\delta$  = 136.72 (C), 135.11 (C), 132.35 (C), 129.32 (C), 129.02 (CH), 126.30 (CH), 125.46 (CH), 125.09 (CH), 124.36 (C), 121.13 (C), 120.44 (CH), 119.96 (CH), 119.74 (CH), 119.33 (CH), 118.23 (C), 110.67 (CH), 21.55 (CH<sub>3</sub>) ppm; IR (ATR):  $\tilde{\nu}$  = 3471 (N–H), 3095, 1605, 1490, 1000, 815 cm<sup>–1</sup>; LCMS (ESI): *m/z* calcd. for [C<sub>17</sub>H<sub>13</sub>N+H]<sup>+</sup>: 232.11, found: 232.20. TON 20.25.

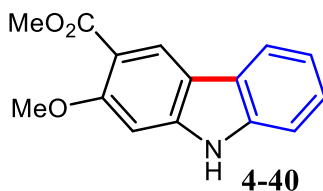

**Clausine L (4-40)**<sup>[1,20]</sup>: Carbazole **4-40** was prepared from **3ka** (153 mg, 0.4 mmol), and purified by column chromatography on silica gel, eluting with hexane/ethyl acetate (80:20). White solid (84 mg, 82%); mp: 170-172 °C (ref.<sup>[21]</sup> 172-173 °C); <sup>1</sup>H NMR (500 MHz, CDCl<sub>3</sub>):  $\delta$  = 8.52 (s, 1H; Ar–H), 8.14 (brs, 1H; N–H), 7.92 (d, *J* = 7.5 Hz, 1H; Ar–H), 7.32-7.28 (m, 2H; Ar–H), 7.19-7.15 (m, 1H; Ar–H), 6.84 (s, 1H; Ar–H), 3.87 (s, 6H; 2-CH<sub>3</sub>) ppm; <sup>13</sup>C NMR (125 MHz, CDCl<sub>3</sub>):  $\delta$  = 167.24 (C=O), 159.49 (C), 143.50 (C), 140.06 (C), 125.60 (CH), 125.16 (CH), 123.71 (C), 120.62 (CH), 120.08 (CH), 116.70 (C), 112.82 (C), 110.81 (CH), 93.80 (CH), 56.51 (CH<sub>3</sub>), 52.08 ppm (CH<sub>3</sub>); IR (ATR):  $\tilde{\nu}$  = 3297 (N–H), 2920, 1690 (C=O), 1634, 1608, 1572, 1458, 1353, 1230, 1076, 727 cm<sup>–1</sup>; LCMS (ESI): *m/z* [M–H]<sup>+</sup> calcd. for C<sub>15</sub>H<sub>13</sub>NO<sub>3</sub>: 254.08, found: 254.00. TON 20.5.

According to the typical procedure, reaction of **3kh** (165 mg, 0.4 mmol), produced a mixture of clausine H (**4-41**, 36 mg, 31%) and methyl 2,5-dimethoxy-9H-carbazole-3-carboxylate (**4-42**, 51 mg, 45%). Carbazoles **4-41** and **4-42** were collected separately during column chromatography on silica gel, eluting with hexane/ethyl acetate (85:15 to 80:20), from the later fractions and earlier fractions, respectively. Combined yield 76% and TON 19.0.

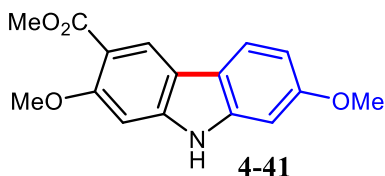

**Clausine H (4-41)**<sup>[1,21]</sup>: Carbazole **4-41** was prepared from **3kh** (165 mg, 0.4 mmol), and purified by column chromatography on silica gel, eluting with hexane/ethyl acetate (80:20) and collected from the later fractions. White solid (36 mg, 31%); mp: 190-192 °C (ref.<sup>[22]</sup> 191-192 °C); <sup>1</sup>H NMR (500 MHz, CDCl<sub>3</sub>): δ= 8.46 (s, 1H; Ar-H), 8.08 (brs, 1H, N-H), 7.83 (d, *J*= 8.0 Hz, 1H, Ar-H), 6.86-6.83 (m, 3H; Ar-H), 3.92 (s, 3H, -CH<sub>3</sub>), 3.91 (s, 3H, -CH<sub>3</sub>), 3.86 (s, 3H, -CH<sub>3</sub>) ppm; <sup>13</sup>C NMR (125 MHz, CDCl<sub>3</sub>): δ= 167.31 (C=O), 158.97 (C), 158.71 (C), 143.57 (C), 141.38 (C), 124.10 (CH), 120.77 (CH), 117.45 (C), 116.91 (C), 112.69 (C), 108.83 (CH), 95.55 (CH), 93.98 (CH), 56.56 (CH<sub>3</sub>), 55.90 (CH<sub>3</sub>), 52.04 (CH<sub>3</sub>) ppm; IR (ATR):  $\tilde{\nu}$  = 3286 (N-H), 2837, 1696 (C=O), 1616, 1573, 1457, 1436, 1275, 1185, 1085, 796, 726 cm<sup>-1</sup>; LCMS (ESI): *m/z* calcd. for [C<sub>16</sub>H<sub>15</sub>NO<sub>4</sub>+H]<sup>+</sup>: 286.10, found: 286.20.

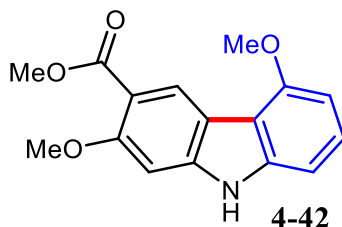

**Methyl 2,5-dimethoxy-9H-carbazole-3-carboxylate (4-42)**<sup>[1]</sup>: Carbazole **4-42** was prepared from **3kh** (165 mg, 0.4 mmol), and purified by column chromatography on silica gel, eluting with hexane/ethyl acetate (80:20) and collected from the earlier fractions. Off-white solid (51 mg, 45%); mp: 176-178 °C; <sup>1</sup>H NMR (500 MHz, CDCl<sub>3</sub>): δ= 8.67 (s, 1H; Ar-H), 8.03 (brs, 1H, N-H), 7.23 (t, *J*= 8.5 Hz, 1H, Ar-H), 6.95 (d, *J*= 8.0 Hz, 1H, Ar-H), 6.85 (s, 1H, Ar-H), 6.64 (d, *J*= 8.0 Hz, 1H, Ar-H), 4.00 (s, 3H, -CH<sub>3</sub>), 3.90 (s, 3H, -CH<sub>3</sub>), 3.87 (s, 3H; CH<sub>3</sub>) ppm; <sup>13</sup>C NMR (125 MHz, CDCl<sub>3</sub>): δ= 167.44 (C=O), 158.82 (C), 155.91 (C), 142.65 (C), 141.38 (C), 127.44 (CH), 126.57 (CH), 116.11 (C), 113.17 (C), 112.87 (C), 103.71 (CH), 101.66 (CH), 93.44 (CH), 56.53 (CH<sub>3</sub>), 55.66 (CH<sub>3</sub>), 52.02 (CH<sub>3</sub>) ppm; IR (ATR):  $\tilde{\nu}$  = 3339 (N-H), 2923, 2852, 1669 (C=O), 1609, 1463, 1431, 1332, 1256, 1097, 744 cm<sup>-1</sup>; LCMS (ESI): *m/z* calcd. for [C<sub>16</sub>H<sub>15</sub>NO<sub>4</sub>+H]<sup>+</sup>: 286.10, found: 286.10.

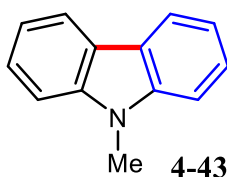

**9-Methyl-9H-carbazole (4-43)**<sup>[1]</sup>: Carbazole **4-43** was prepared from **3aa-1** (124 mg, 0.4 mmol), and purified by column chromatography on silica gel, eluting with hexane/ethyl acetate (97:3). White solid (67 mg, 92%); mp: 90-92 °C; <sup>1</sup>H NMR (250 MHz, CDCl<sub>3</sub>): δ = 8.14 (d, *J* = 7.5 Hz, 2H, Ar-H), 7.55-7.42 (m, 4H, Ar-H), 7.28 (dd, *J* = 7.7, 1.2 Hz, 2H, Ar-H), 3.89 (s, 3H, CH<sub>3</sub>) ppm; <sup>13</sup>C NMR (62.5 MHz, CDCl<sub>3</sub>): δ = 141.00 (2C), 125.68 (2CH), 122.77 (2C), 120.31 (2CH), 118.83 (2CH), 108.43 (2CH), 29.09 (CH<sub>3</sub>) ppm; IR (ATR):  $\tilde{\nu}$ =3051, 2927, 2359, 1628, 1597, 1493, 1450, 1323, 1246, 1128, 1058, 922, 850, 771, 743 cm<sup>-1</sup>; LCMS (ESI): *m/z* calcd. for [C<sub>13</sub>H<sub>11</sub>N+H]<sup>+</sup>: 182.09, found: 182.10. TON 23.0.

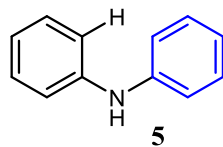

**Diphenylamine (5):** Off-white solid; mp: 52-54 °C;  $^1\text{H}$  NMR (400 MHz, DMSO- $\text{D}_6$ ):  $\delta$  = 8.14 (brs, 1H, N-H), 7.22 (t,  $J$  = 8.0 Hz, 4H, Ar-H), 7.06 (d,  $J$  = 7.7 Hz, 4H, Ar-H), 6.81 (t,  $J$  = 7.3 Hz, 2H, Ar-H) ppm; LCMS  $m/z$  [ $M+\text{H}$ ] $^+$  calcd for  $\text{C}_{12}\text{H}_{12}\text{N}$ : 170.09, found: 170.20.

## 7. Analytical techniques for the characterization of PdNPs catalysts 1 and 2.

### 7.1 FTIR (Fourier Transform Infrared Spectroscopy) studies:

FTIR spectra (Figure S8) were recorded with a Shimadzu FTIR spectrometer IR Affinity-1S using the ATR (Attenuated Total Reflectance) method. Powder of the solid samples (CTAB,  $\text{Pd}(\text{OAc})_2$ , PdNPs 1, and PdNPs 2) were used to collect their IR spectra. IR spectrum of DBU was collect as neat (liquid) sample.

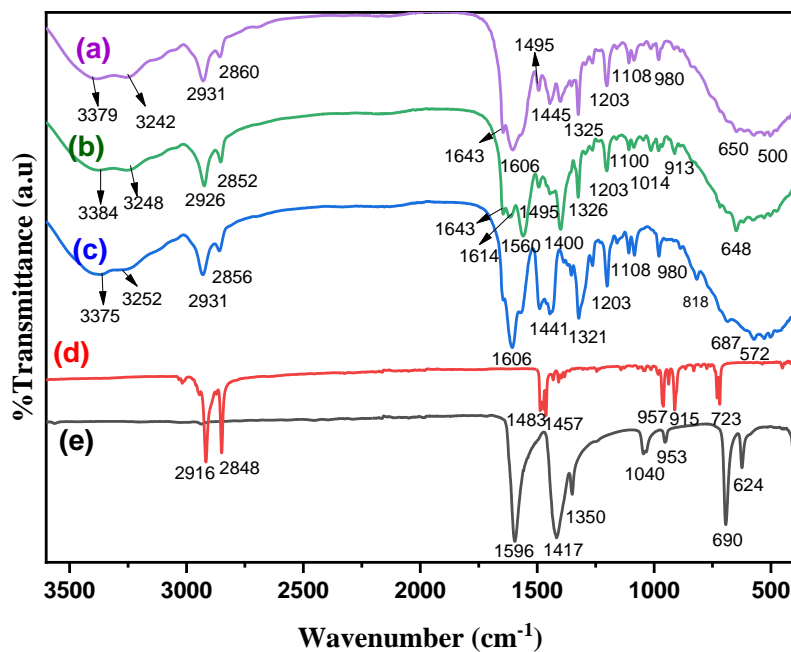

**Figure S8.** FTIR spectra of (a) PdNPs catalyst 1 ( $\text{Pd}(\text{OAc})_2$ +CTAB+DBU), (b) PdNPs catalyst 2 ( $\text{Pd}(\text{OAc})_2$ +CTAB), (c) DBU, (d) CTAB and (e)  $\text{Pd}(\text{OAc})_2$ .

The FTIR spectrum of Pd catalyst 2 showed shifting of the characteristic vibration peaks of  $\text{Pd}(\text{OAc})_2$  and CTAB. Peaks of  $\text{Pd}(\text{OAc})_2$  at 1596 ( $\tilde{\nu}_{\text{as}}$ ) and 1350 ( $\tilde{\nu}_{\text{s}}$ )  $\text{cm}^{-1}$  due to the stretching vibrations of C=O, and a sharp peak at 1417  $\text{cm}^{-1}$  due to the ionized carboxylate group,<sup>[22a]</sup> were found to shift at 1560, 1326 and 1400  $\text{cm}^{-1}$  respectively, in catalyst

2 (Figure S8b). Also the shift of the C–H scissoring vibrations of H–C–N<sup>+</sup> of CTAB molecules<sup>[22b]</sup> from 1483–1457 cm<sup>−1</sup> to 1495–1460 cm<sup>−1</sup>, and disappearance of the peak at 690 cm<sup>−1</sup> for Pd–O bond<sup>[22c]</sup> of Pd(OAc)<sub>2</sub> in catalyst 2 hinted at significant interactions of CTAB with Pd(OAc)<sub>2</sub>. In the FTIR spectrum of catalyst 1 (Figure S8a), shift of the vibrational peaks respective to the catalyst 2 as well as DBU,<sup>[22d]</sup> and appearance of the peaks at 1643 (C=N<sup>+</sup>), 1606 (C=N), 1560, 1445, 1400 and 1325 cm<sup>−1</sup>, indicated at Pd(DBU) complex formation. The appearance of new peaks in the region 650 to 500 cm<sup>−1</sup> with the disappearance of the sharp peak at 690 cm<sup>−1</sup> for the Pd–O vibration of Pd(OAc)<sub>2</sub> indicated the formation of Pd(0) nanostructures<sup>[22b]</sup> with the displacement of acetate groups, and revealed the binding interaction of DBU and CTAB to PdNPs via Pd–N linkage.

## 7.2 UV-Vis (Ultraviolet-visible) studies:

UV-Vis absorption experiments were done on a Shimadzu UV/Vis spectrophotometer at 25±0.1 °C in a quartz cuvette of 1.00 cm path length. Dilute solution of samples (Pd(OAc)<sub>2</sub>, PdNPs 1, and PdNPs 2) were used to collect their UV-Vis spectra (Figure S9).

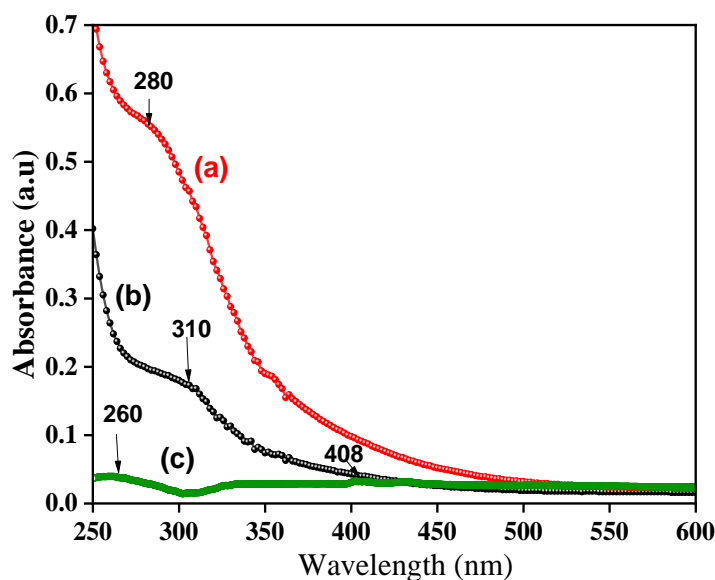

**Figure S9.** UV-Vis absorption spectra of (a) PdNPs catalyst 1, (b) PdNPs catalyst 2, and (c) Pd(OAc)<sub>2</sub>.

In the UV-Vis spectrum of Pd catalyst 2 (Figure S9b), the appearance of a shoulder at 310 nm with the disappearance of the characteristic peaks of Pd(OAc)<sub>2</sub> at 260 and 408 nm,<sup>[23]</sup> indicated the interaction of CTAB with Pd(OAc)<sub>2</sub>. The appearance of a shoulder at 280 nm for the colloidal suspension of Pd catalyst 1 (Figure S9a) with the disappearance of the above peaks hinted at the coordination of DBU to the Pd center, and complete reduction of Pd(II) species to nanosized Pd(0) species<sup>[24]</sup> under microwave-assisted heating. The shift of peak positions from 310 nm to 280 nm indicated at smaller nano-sized Pd(0) species formation in presence of DBU under microwave-assisted heating.



### 7.3 PXRD (Powdered X-ray diffraction) studies:

The PXRD study was done by Bruker D8 Advance X-ray diffractometer using Cu-K $\alpha$  ( $\lambda = 1.5418 \text{ \AA}$ ) radiation.

Powder of the solid samples (PdNPs 1, and PdNPs 2) were used to collect their PXRD data.

#### Williamson-Hall Equation:

$$\beta \cos \theta = 4\varepsilon \sin \theta + \frac{K\lambda}{D}$$

Where,  $\beta$  represents FWHM (Full width half maxima) of each XRD peak (radian),

$\theta$  is the Bragg's angle,  $\lambda$  is the wavelength of the radiation; 0.154 in nm, K is constant value;

0.9D represents crystallite size of the material in nm,  $\varepsilon$  describes lattice strain of the material.

When, we plotted  $\beta \cos \theta$  versus  $4 \sin \theta$ , we got the lattice strain from the slope and crystallite size component from the intercept (Figure S10).

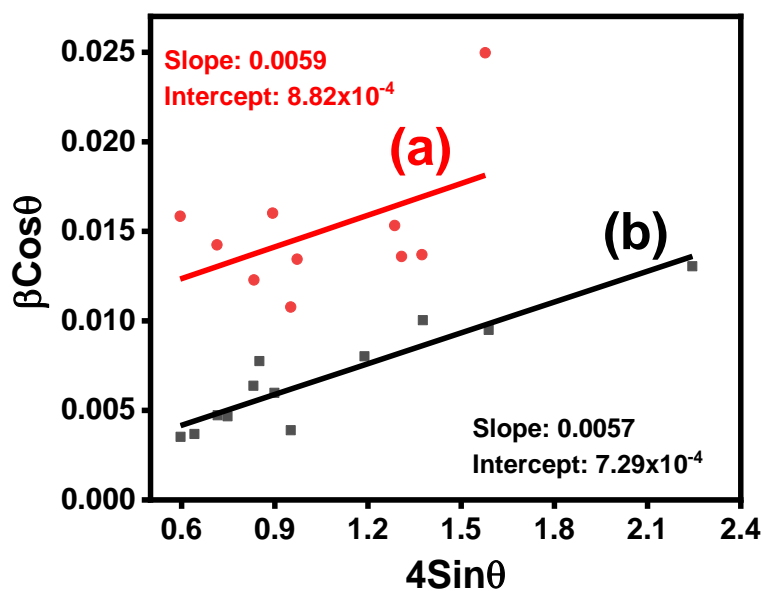

**Figure S10.** Williamson-Hall plot of (a) PdNPs catalyst 1 and (b) PdNPs catalyst 2.

**Table S6.** Calculation details of Williamson-Hall plot for PdNPs 1 [Pd(OAc)<sub>2</sub>+CTAB+DBU]

| Peak (2θ) | FWHM    | Size | Average Size | Radians (2θ) | Radians of FWHM | βcosθ  | 4sinθ  | Slope  | Intercept |
|-----------|---------|------|--------------|--------------|-----------------|--------|--------|--------|-----------|
| 17.12     | 0.918   | 6.55 | 7.23         | 0.15         | 0.016           | 0.0158 | 0.5955 | 0.0059 | 8.82E-4   |
| 20.56     | 0.8295  | 7.29 |              | 0.18         | 0.014           | 0.0142 | 0.7141 |        |           |
| 24.03     | 0.71961 | 8.45 |              | 0.21         | 0.012           | 0.0122 | 0.8327 |        |           |
| 25.80     | 0.9413  | 6.48 |              | 0.22         | 0.016           | 0.0160 | 0.8931 |        |           |
| 27.52     | 0.6352  | 9.64 |              | 0.24         | 0.011           | 0.0107 | 0.9515 |        |           |
| 28.13     | 0.794   | 7.72 |              | 0.24         | 0.014           | 0.0134 | 0.9720 |        |           |
| 37.50     | 0.9272  | 6.78 |              | 0.32         | 0.016           | 0.0153 | 1.285  |        |           |
| 38.18     | 0.824   | 7.64 |              | 0.33         | 0.014           | 0.0135 | 1.3082 |        |           |
| 40.16     | 0.8353  | 7.58 |              | 0.35         | 0.014           | 0.0136 | 1.3736 |        |           |
| 46.45     | 1.5566  | 4.16 |              | 0.40         | 0.027           | 0.0249 | 1.5775 |        |           |

**Table S7.** Calculation details of Williamson-Hall plot for PdNPs 2 [Pd(OAc)<sub>2</sub>+CTAB]

| Peak (2θ) | FWHM   | Size  | Average Size | Radians (2θ) | Radians of FWHM | βcosθ  | 4sinθ  | Slope   | Intercept |
|-----------|--------|-------|--------------|--------------|-----------------|--------|--------|---------|-----------|
| 17.17     | 0.2040 | 39.35 | 24.23        | 0.15         | 0.0031          | 0.0035 | 0.5969 | 0.00573 | 7.297E-4  |
| 18.46     | 0.2134 | 37.68 |              | 0.16         | 0.0034          | 0.0037 | 0.6415 |         |           |
| 20.62     | 0.2753 | 29.32 |              | 0.18         | 0.0048          | 0.0047 | 0.7160 |         |           |
| 21.55     | 0.2724 | 29.67 |              | 0.19         | 0.004           | 0.0047 | 0.7479 |         |           |
| 23.99     | 0.3734 | 21.74 |              | 0.21         | 0.0065          | 0.0064 | 0.8313 |         |           |
| 24.55     | 0.4543 | 17.88 |              | 0.21         | 0.0079          | 0.0077 | 0.8506 |         |           |
| 25.97     | 0.3518 | 23.17 |              | 0.22         | 0.0061          | 0.006  | 0.8989 |         |           |
| 27.52     | 0.2296 | 35.60 |              | 0.24         | 0.0040          | 0.0038 | 0.9514 |         |           |
| 34.58     | 0.4810 | 17.29 |              | 0.3          | 0.0083          | 0.0080 | 1.1889 |         |           |
| 40.26     | 0.6125 | 13.81 |              | 0.35         | 0.0107          | 0.0100 | 1.3765 |         |           |
| 46.8      | 0.5929 | 14.6  |              | 0.41         | 0.0103          | 0.0095 | 1.5885 |         |           |
| 68.26     | 0.9029 | 10.62 |              | 0.60         | 0.016           | 0.013  | 2.2442 |         |           |

#### 7.4 FE-SEM (Field Emission Scanning Electron Microscopy) studies:

The FE-SEM images were collected by QUANTA FEG 250, and Carl Zeiss Sigma SUPRA 55VP instruments at 10 KV. The sample solution in dichloromethane (DCM) was drop-casted onto a silicon wafer, and it was vacuum-dried

in a desiccator. In addition the Figure 4 in the manuscript, more FESEM images of PdNPs catalyst 1 and catalyst 2 are given here in Figure S11a,b, and Figure S11c,d., respectively.

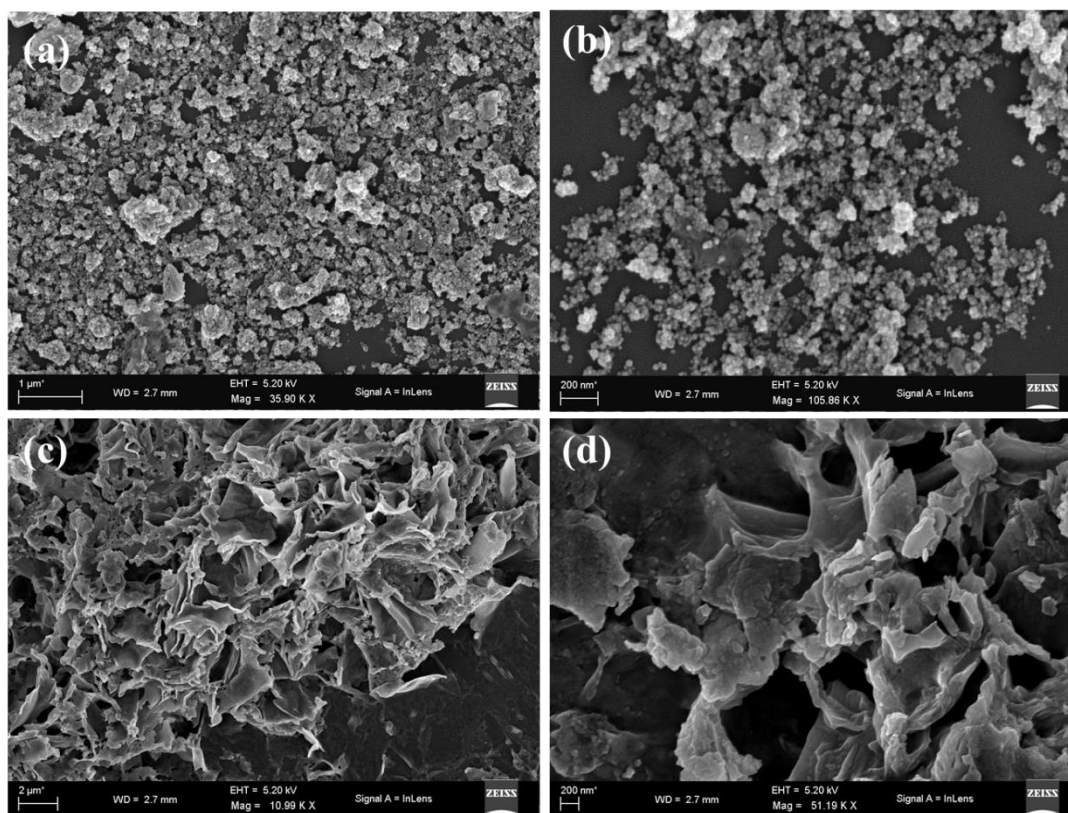

**Figure S11.** (a,b) FESEM images of PdNPs catalyst 1, and (c,d) FESEM images of PdNPs catalyst 2.

### 7.5 HR-TEM (High-Resolution Transmission Electron Microscopy) studies:

High-resolution transmission electron microscopy (HR-TEM) images were collected from JEOL, JEM-2100F instrument, operating at an accelerating voltage of 200 kV. The EDS mapping related to this was recorded using the same instrument. Samples for TEM measurements were prepared by dispersing a 2 mg of the catalyst (PdNPs 1, and PdNPs 2) in 2-propanol in the ultrasonic bath, and then placing a drop of suspension on a copper grid coated with carbon film. Transmission electron microscopy (TEM) images of the recovered Pd catalysts were recorded by JEOL JEM-2100F microscope, operating at an accelerating voltage of 200 kV equipped with an Oxford EDX attachment. The sample solution in dichloromethane (DCM) was drop-casted onto a 200-mesh copper carbon-coated grid and vacuum-dried under in a desiccator. HRTEM images of PdNPs catalyst 2 are given in Figure S12.

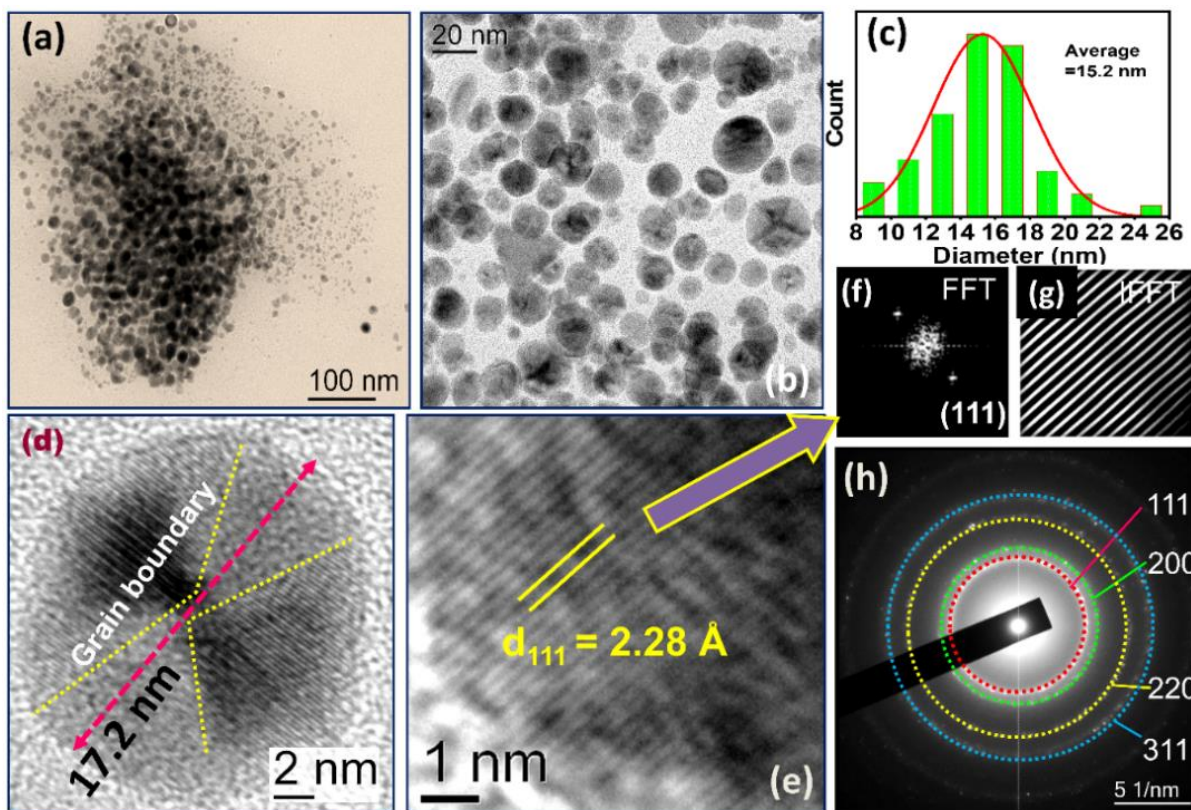

**Figure S12.** (a,b) TEM and HRTEM images of PdNPs catalyst 2, (c) Corresponding particle size distribution plot, (d) Particle showing grain boundary, (e-g) HRTEM image showing (111) plane and corresponding FFT and IFFT patterns of (111) plane, and (h) SAED pattern.

## 7.6 Energy dispersive X-ray (EDX) analysis:

Energy dispersive X-ray (EDX) analysis was done to prove the nanostructure, identify the chemical elements and determine their concentrations in the PdNPs catalyst 1. Energy dispersive X-ray (EDX) image corresponding to the PdNPs catalyst 1 of an average dimensions *ca* 8.2 nm indicated that the PdNPs were well distributed on the surface (Figure S13). Thus, it hinted that DBU - the organic base as well as ligand, played a key role in enhancing the dispersibility of the PdNPs. Homogeneous distribution of palladium (Pd) and carbon (C) was noticed in the structure of the nanopowder, and the absence of impurities confirmed the purity of the PdNPs catalyst 1.

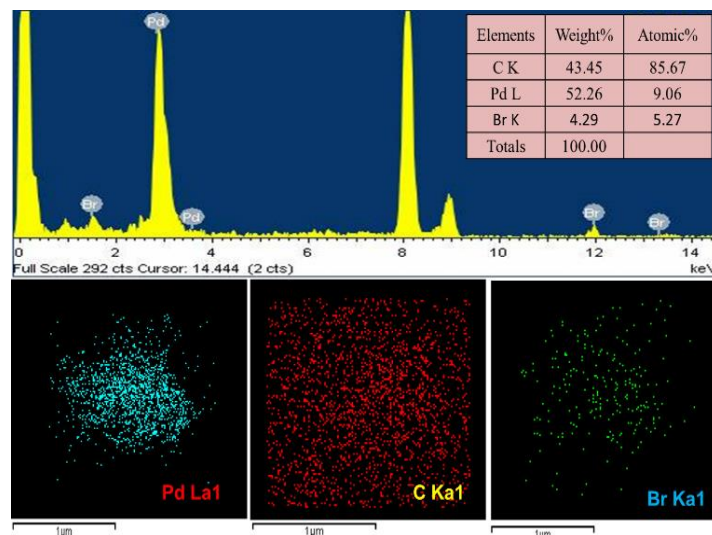

**Figure S13.** EDX images of PdNPs catalyst 1.

### 7.7 X-ray Photoelectron Spectroscopy (XPS) analysis:

To evaluate the oxidation states of palladium present in the in situ generated Pd nanoparticle catalysts 1 and 2, X-ray Photoelectron Spectroscopy (XPS) data analysis was collected. In the case of Pd catalyst 1, the presence of peaks at 340.1 and 334.7 eV with relative intensity ~2:3, indicated electron transitions from Pd(0) 3d<sub>3/2</sub> and Pd(0) 3d<sub>5/2</sub>. Whereas, in the case of Pd catalyst 2, along with the peaks at 340.6 and 335.3 eV, due to electron transitions from Pd(0) 3d<sub>3/2</sub> and Pd(0) 3d<sub>5/2</sub>, the appearance of two more intense peaks at 342.5 and 337.2 eV having relative intensity ~2:3, indicated electron transition from Pd(II) 3d<sub>3/2</sub> and Pd(II) 3d<sub>5/2</sub> (Figure 6, in manuscript). Thus the PdNPs catalyst 1 contained almost 100% Pd(0), whereas Pd catalyst 2 contained a mixture of Pd(II) (~70%) and Pd(0) (~30%) with a ratio ~2.3:1. Hence, here DBU is acting as a reducing agent to reduce the Pd(II) species to Pd(0) species.

Analysis of the XPS survey plots of Pd catalysts 1 and 2 (Figure S14), showed a peak near 402.4 eV due to the presence of quaternary N in catalyst 2. However, the intensity of that peak was found to decrease with shifting its position to lower energy (at 401.7 eV) in catalyst 1. And the appearance of peaks at 397.7 eV (for C-N), 399.3 eV (for C=N) and 400.3 eV (for C=N-C), suggested binding of BDU to Pd(0) via C=N-Pd coordinate linkage in catalyst 1. And micelles of CTAB stabilize the Pd(0) nanoparticles in water medium through ion-dipole interactions with its polar heads.

Compared to Pd catalyst 2, the intensity of peaks corresponding to Pd 3p, Pd 3d and O 1s increases, whereas the intensity of the peak for C 1s decreases in Pd catalyst 1. Peaks corresponding to Br 3d and 3p which are present in catalyst 2, are absent in catalyst 1. Peaks at 532.6 eV (for C=O) and 533.2 eV (for C-O-Pd) indicate the presence of some palladium(II) acetate in catalyst 2. On the other hand, the appearance of peaks at 533.5 eV (for COOH) and 531.4 eV (for C-OH) in catalyst 1, indicates the displacement of those acetate groups by DBU to generate Pd(0) and acetic acid molecules, which react with basic DBU. The peaks at 286.2 eV (for C-O/C-N) and 284.8 eV (for C-C) of C 1s are due to the presence of CTAB and acetate groups in catalyst 2.

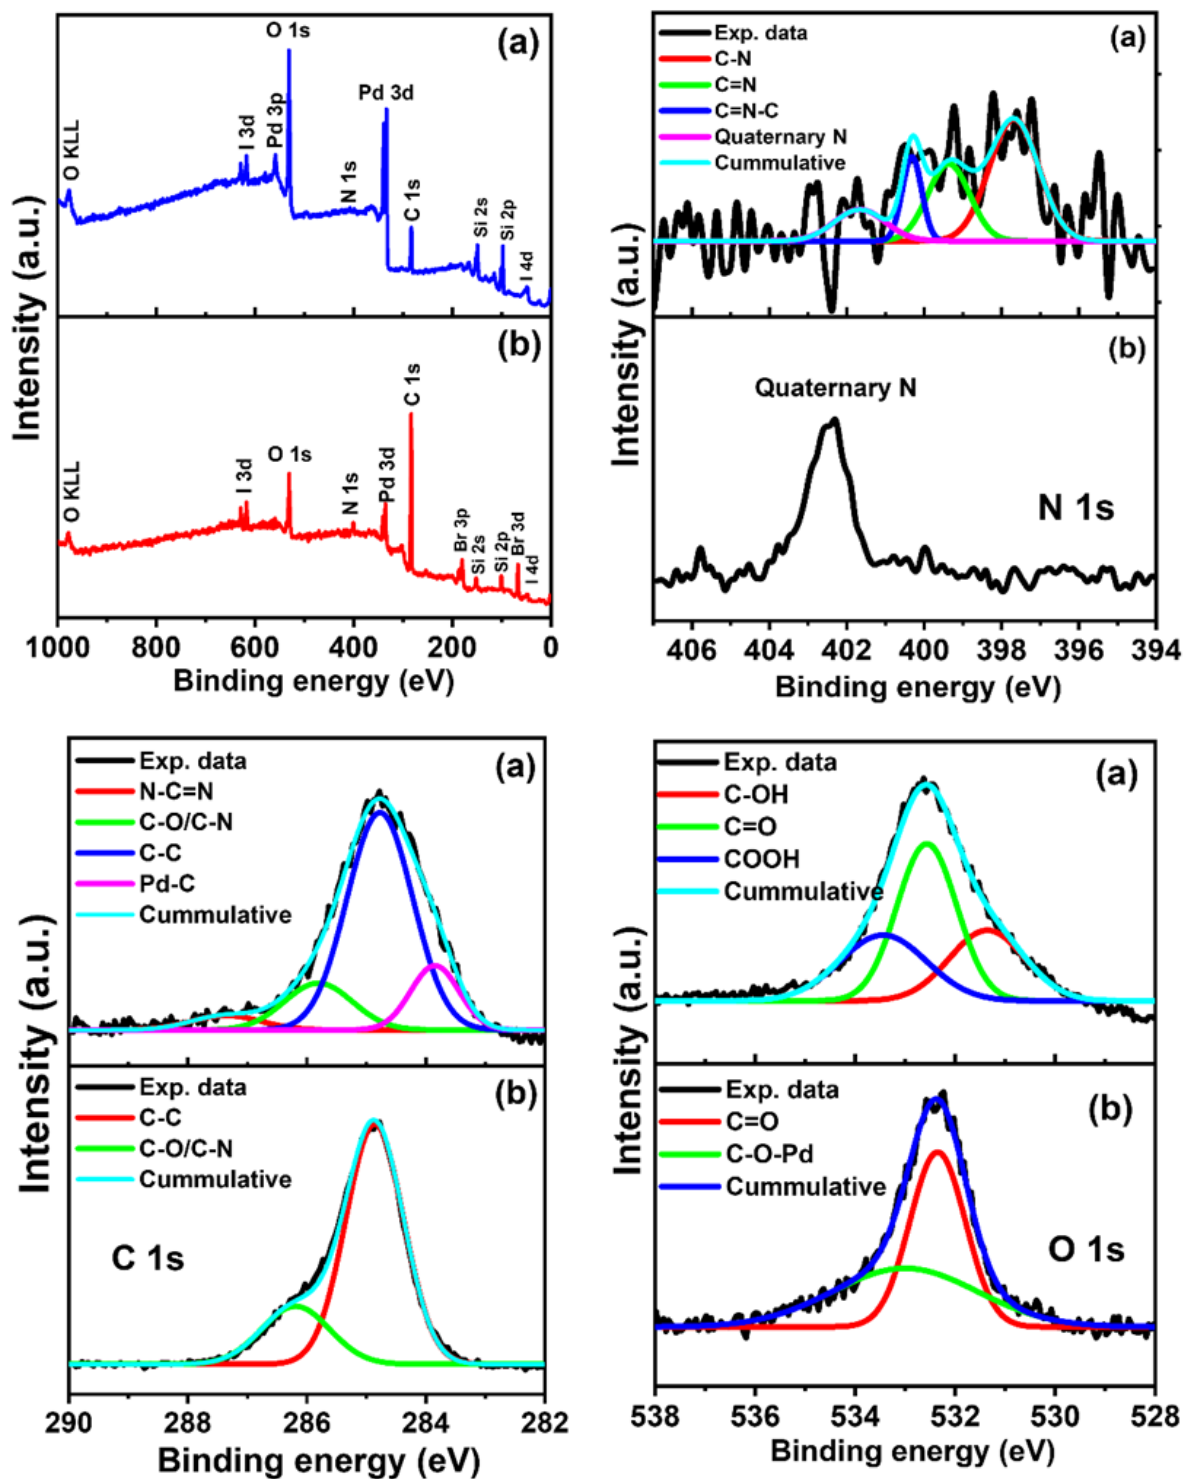

**Figure S14.** XPS data of (a) Pd catalyst 1 (collected from  $\text{Pd}(\text{OAc})_2 + \text{CTAB} + \text{DBU}$ ), and (b) Pd catalyst 2 (collected from  $\text{Pd}(\text{OAc})_2 + \text{CTAB}$ ).



## 7.8 Single crystal X-ray diffraction (SCXRD) analysis:

SCXRD data were collected with Mo K $\alpha$  radiation by a Bruker APEX-2 CCD diffractometer. The data were processed using the Bruker SAINT package. The structure solution and refinement were performed by SHELX97.

Isolated solid Pd catalyst 2 (collected from Pd(OAc)<sub>2</sub> + CTAB) was found crystalline in nature. For crystallization it was dissolved in DCM, and allowed for slow evaporation. Its single crystal XRD data showed presence of Pd(II)Br<sub>4</sub>.(CTAB)<sub>2</sub> crystals (Figure S15).

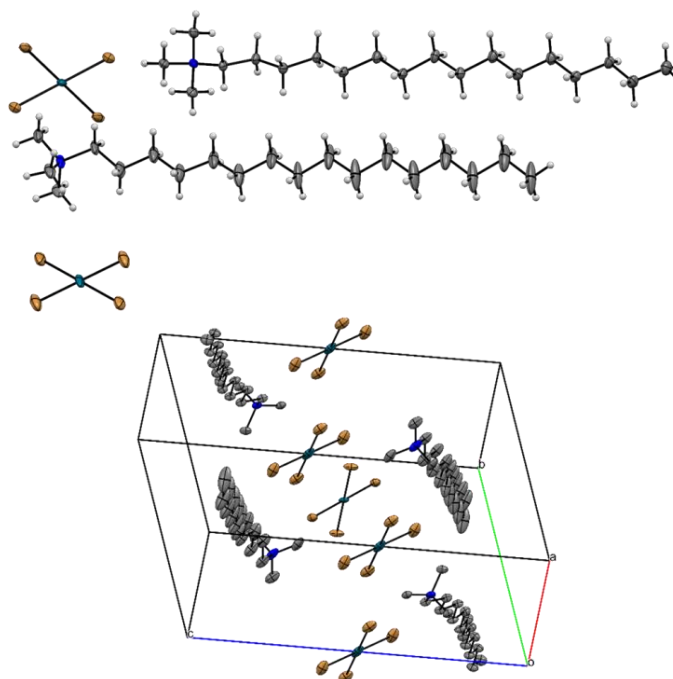

**Figure S15.** Single crystal structure of Pd catalyst 2, with ORTEP representation showing thermal ellipsoids at the 50% probability level. Hydrogen atoms are omitted for clarity. Color: Deep blue (N), Yellow (Br) and Sky blue (Pd).

SCXRD data of Pd catalyst 2:

|                            |                                                                    |
|----------------------------|--------------------------------------------------------------------|
| <b>CCDC No.</b>            | 2495048                                                            |
| <b>Identification code</b> | SB_JA_61                                                           |
| <b>Empirical formula</b>   | C <sub>19</sub> H <sub>42</sub> Br <sub>2</sub> NPd <sub>0.5</sub> |
| <b>Formula weight</b>      | 497.55                                                             |
| <b>Temperature/K</b>       | 101.00                                                             |
| <b>Crystal system</b>      | triclinic                                                          |
| <b>Space group</b>         | P-1                                                                |
| <b>a/Å</b>                 | 8.8718(10)                                                         |
| <b>b/Å</b>                 | 13.5374(15)                                                        |
| <b>c/Å</b>                 | 19.143(2)                                                          |

|                                                |                                                               |
|------------------------------------------------|---------------------------------------------------------------|
| $\alpha/^\circ$                                | 84.934(4)                                                     |
| $\beta/^\circ$                                 | 82.326(4)                                                     |
| $\gamma/^\circ$                                | 88.275(4)                                                     |
| Volume/ $\text{\AA}^3$                         | 2269.2(4)                                                     |
| Z                                              | 4                                                             |
| $\rho_{\text{calc}}/\text{cm}^3$               | 1.456                                                         |
| $\mu/\text{mm}^{-1}$                           | 3.956                                                         |
| F(000)                                         | 1024.0                                                        |
| Crystal size/ $\text{mm}^3$                    | $0.8 \times 0.5 \times 0.1$                                   |
| Radiation                                      | MoK $\alpha$ ( $\lambda = 0.71073$ )                          |
| 2 $\theta$ range for data collection/ $^\circ$ | 3.858 to 50.046                                               |
| Index ranges                                   | $-10 \leq h \leq 10, -16 \leq k \leq 16, -22 \leq l \leq 22$  |
| Reflections collected                          | 57238                                                         |
| Independent reflections                        | 8014 [ $R_{\text{int}} = 0.0711, R_{\text{sigma}} = 0.0492$ ] |
| Data/restraints/parameters                     | 8014/302/418                                                  |
| Goodness-of-fit on $F^2$                       | 1.023                                                         |
| Final R indexes [ $I \geq 2\sigma(I)$ ]        | $R_1 = 0.0484, wR_2 = 0.1196$                                 |
| Final R indexes [all data]                     | $R_1 = 0.0689, wR_2 = 0.1357$                                 |
| Largest diff. peak/hole / $e \text{\AA}^{-3}$  | 2.15/-1.17                                                    |

Isolated Pd catalyst 2 was found crystalline in nature, and its single crystal XRD data showed presence of  $\text{Pd(II)Br}_4 \cdot (\text{CTAB})_2$  unit (Figure S15). Thus, there are ionic bonds between the anionic  $\text{Pd(II)}$  species and ammonium ions of CTAB in Pd catalyst 2. However, the Pd catalyst 1 was found amorphous in nature, and it was difficult to confirm the nature of the Pd–N linkage, at this stage. Thus, there may be coordinate linkage between the  $\text{Pd(0)}$  and DBU, a neutral amidine ligand, for generating a tetrahedral  $\text{Pd(DBU)}_4$  complex, via Pd–N=C bonds in  $\text{Pd(0)}$  catalyst 1 (Figure S16).

Pd catalyst 1

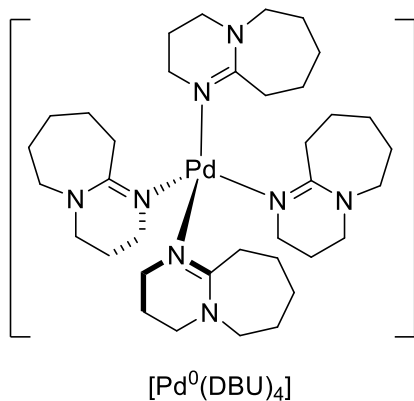

Pd catalyst 2

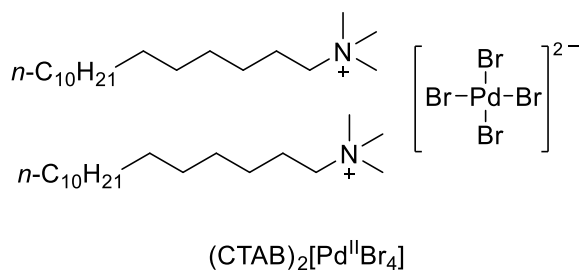

**Figure S16.** Possible Pd–N linkages of DBU and CTAB ligands to Pd in catalyst 1 and catalyst 2.



**7.9 Analytical data of the recovered Pd catalysts:** FESEM micrographs of recovered PdNPs catalyst (after 3<sup>rd</sup> recycling reaction) are given in Figure S17. XPS data and TEM images of recovered PdNPs catalyst are given in Figure S18 and Figure S19, respectively.

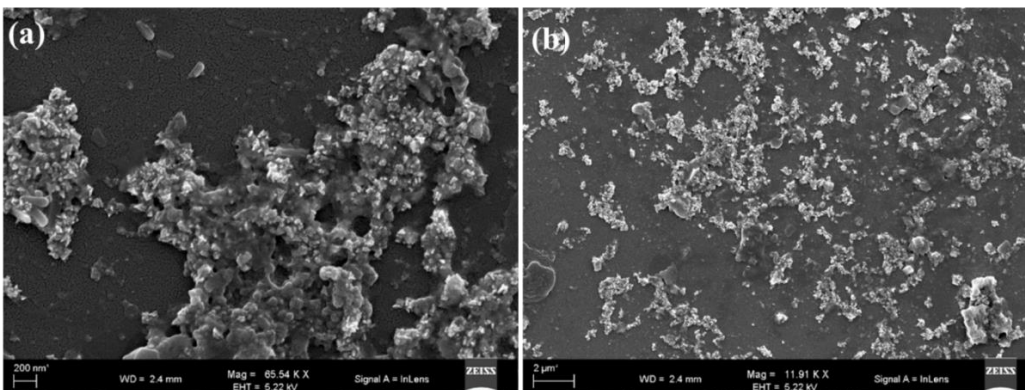

**Figure S17.** FESEM micrographs of recovered PdNPs catalyst after 3<sup>rd</sup> recycling reaction.

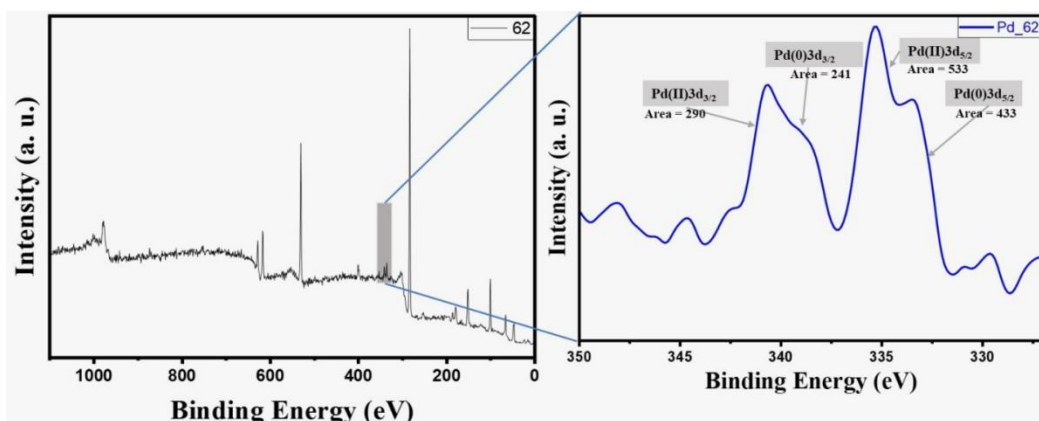

**Figure S18.** XPS data of recovered PdNPs catalyst after 3<sup>rd</sup> recycling reaction.

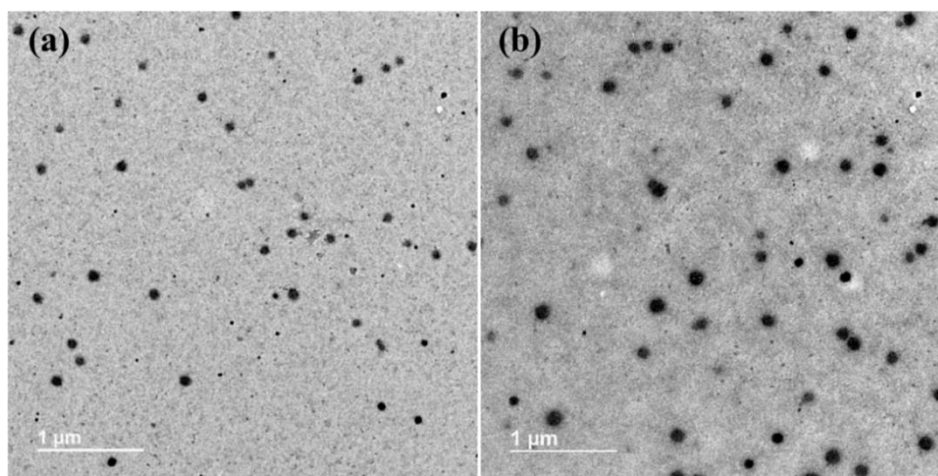

**Figure S19.** TEM images of recovered PdNPs catalysts (a) after 1<sup>st</sup> recycling (size ~50 nm), and (b) after 3<sup>rd</sup> recycling (size ~80 nm) reactions.

## 8. References:

- [1] a) A. Khan, R. Karim, H. Dhimane and S. Alam, *ChemistrySelect*. 2019, **4**, 6598; b) R. Karim, A. R. Mallick, A. Khan, M. S. Islam, N. Sepay, A. Kumar, A. Maruani, H. Dhimane and S. Alam, *ChemistrySelect* 2025, **10**, e04524.
- [2] B. Akermarck, L. Eberson, E. Jonsson and E. Pettersson, *J. Org. Chem.* 1975, **40**, 1365.
- [3] a) M. E. Buden, V. A. Vaillard, S. E. Martin and R. A. Rossi, *J. Org. Chem.* 2009, **74**, 4490; b) L. Wen, L. Tang, Y. Yang, Z. Zha and Z. Wang, *Org. Lett.* 2016, **18**, 1278.
- [4] K. Takamatsu, K. Hirano, T. Satoh and M. Miura, *Org. Lett.* 2014, **16**, 2892.
- [5] W.-S. Li, J. D. McChesney and F. S. El-Feraly, *Phytochemistry* 1991, **30**, 343.
- [6] E. Campagne and R. D. Lake, *J. Org. Chem.* 1959, **24**, 478.
- [7] J. Z. Kyziol and A. Lyzniak, *Tetrahedron* 1980, **36**, 3017.
- [8] S. Alam, R. Karim, A. Khan, A. R. Mallick, N. Sepay and Ghosh, S. *Synth. Commun.* 2022, **52**, 1834.
- [9] M. Pudlo, D. Csanyi, F. Moreau, G. Hajos, Z. Riedl and J. Sapi, *Tetrahedron* 2007, **63**, 10320.
- [10] C. Jutz and R. M. Wagner, *Angew. Chem.* 1972, **84**, 299; *Angew. Chem. Int. Ed.* 1972, **11**, 315.
- [11] P. Spagnolo and P. Zanirato, *J. Chem. Soc. Perkin Trans. I* 1988, 2615.
- [12] L. Ackermann, A. Althammer and P. Mayer, *Synthesis* 2009, **2009**, 3493.
- [13] H. Peng, X. Chen, Y. Chen, Q. He, Y. Xie and C. Yang, *Tetrahedron* 2011, **67**, 5725.
- [14] J. Ban, M. Lim, S. Shabbir, J. Baek and H. Rhee, *Synthesis* 2020, **2020**, 917.
- [15] Routiar *et al.* US 2015/0368226 A1.
- [16] S. Chakrabarty, I. Chatterjee, L. Tebben and A. Studer, *Angew. Chem. Int. Ed.* 2013, **52**, 2968.
- [17] J. H. Smitrovich and I. W. Davies, *Org. Lett.* 2004, **6**, 533.
- [18] D.-Y. Goo and S. K. Woo, *Org. Biomol. Chem.* 2016, **14**, 122.
- [19] A. P. Kale, G. S. Kumar, A. R. K. Mangadan and K. Kapur, *Org. Lett.* 2015, **17**, 1324.
- [20] R. Forke, M. P. Krahle, F. Däbritz, A. Jäger and H.-J. Knölker, *Synlett* 2008, **2008**, 1870.
- [21] O. Kataeva, M. P. Krahle and H.-J. Knölker, *Org. Biomol. Chem.* 2005, **3**, 3099.
- [22] a) L. Šoptrajanová and B. Šoptrajanov, *Spectrosc. Lett.* 1992, **25**, 1131; b) R. K. Upadhyay, N. Soin, S. Saha, A. Barman and S. S. Roy, *Mater Chem Phys.* 2015, **156**, 105; c) M. Sarmah, A. B. Neog, P. K. Boruah, M. R. Das, P. Bharali and U. Bora, *ACS Omega.* 2019, **4**, 3329-3340; d) S. Basel, K. Bhardwaj, S. Pradhan, A. Pariyar and S. Tamang, *ACS Omega.* 2019, **5**, 6666-6675.
- [23] F. A. Harraz, S. E. El-Hout, H. M. Killa and I. A. Ibrahim, *J. Catal.* 2012, **286**, 184-192.
- [24] X.-F. Qiu, J.-Z. Xu, J.-M. Zhu, J.-J. Zhu, S. Xu and H.-Y. Chen, *J. Mater. Res.* 2003, **18**, 1399-1404.

**9.1  $^1\text{H}$  NMR and  $^{13}\text{C}$  NMR spectra of 2-halo-*N*-arylanilines 3:**  $^1\text{H}$  NMR spectra of 2-iodo-*N*-arylanilines (3a'a, 3a''a, 3ba, 3ca, 3ea, 3fa, 3ga, 3ha, 3ia, 3ja, 3ab, 3ac, 3ae, 3af, 3ag, 3ah, 3ai, 3aj, 3ak, 3am, 3fe, 3eg, 3fg, 3gg, 3hg, 3ig, 3ap, 3aq, 3bq, 3ka, 3ka and 3aa-1); and  $^1\text{H}$  NMR and  $^{13}\text{C}$  NMR spectra of 2-iodo-*N*-arylanilines (3da, 3da, 3al, 3an, 3ao, 3ec, 3fc, 3fd, 3bg, 3cn, 3ap, 3bp, 3ba-1 and 3ia-1) are given here.

$^1\text{H}$  NMR spectrum of 2-iodo-*N*-phenylaniline (3aa) in  $\text{CDCl}_3$  is given at page S24 (Figure S1b).

$^1\text{H}$  NMR spectrum of 2-bromo-*N*-phenylaniline (3a'a) in  $\text{CDCl}_3$ .

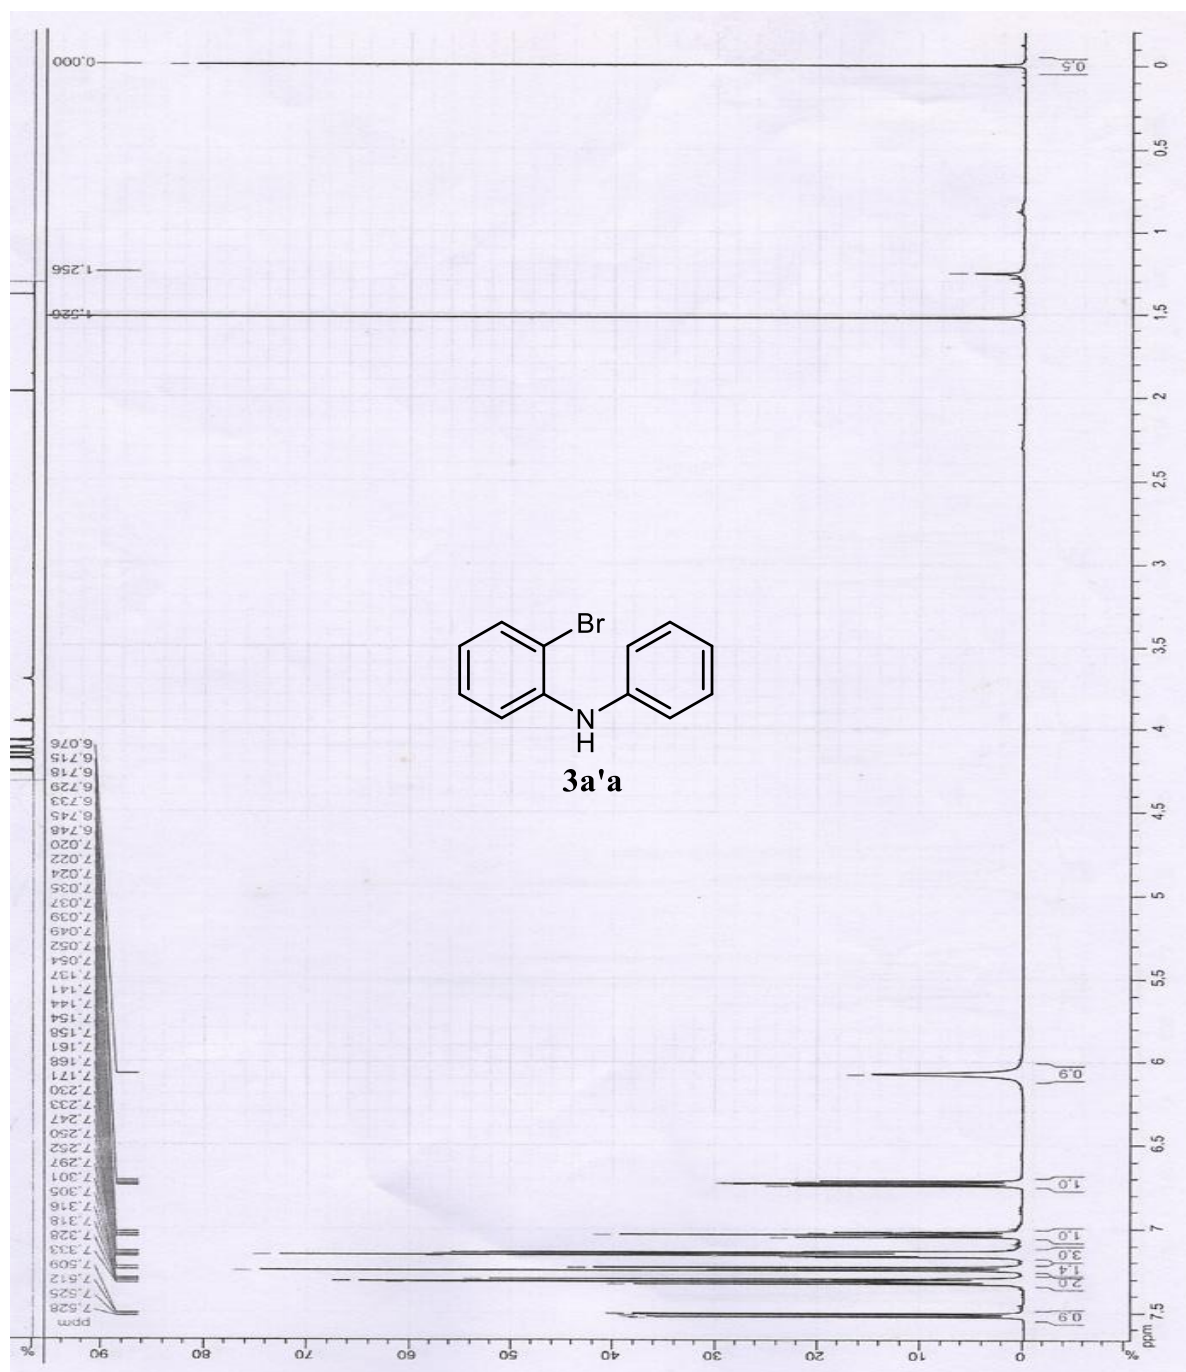

$^1\text{H}$  NMR spectrum of 2-chloro-*N*-phenylaniline (**3a''a**) in  $\text{CDCl}_3$

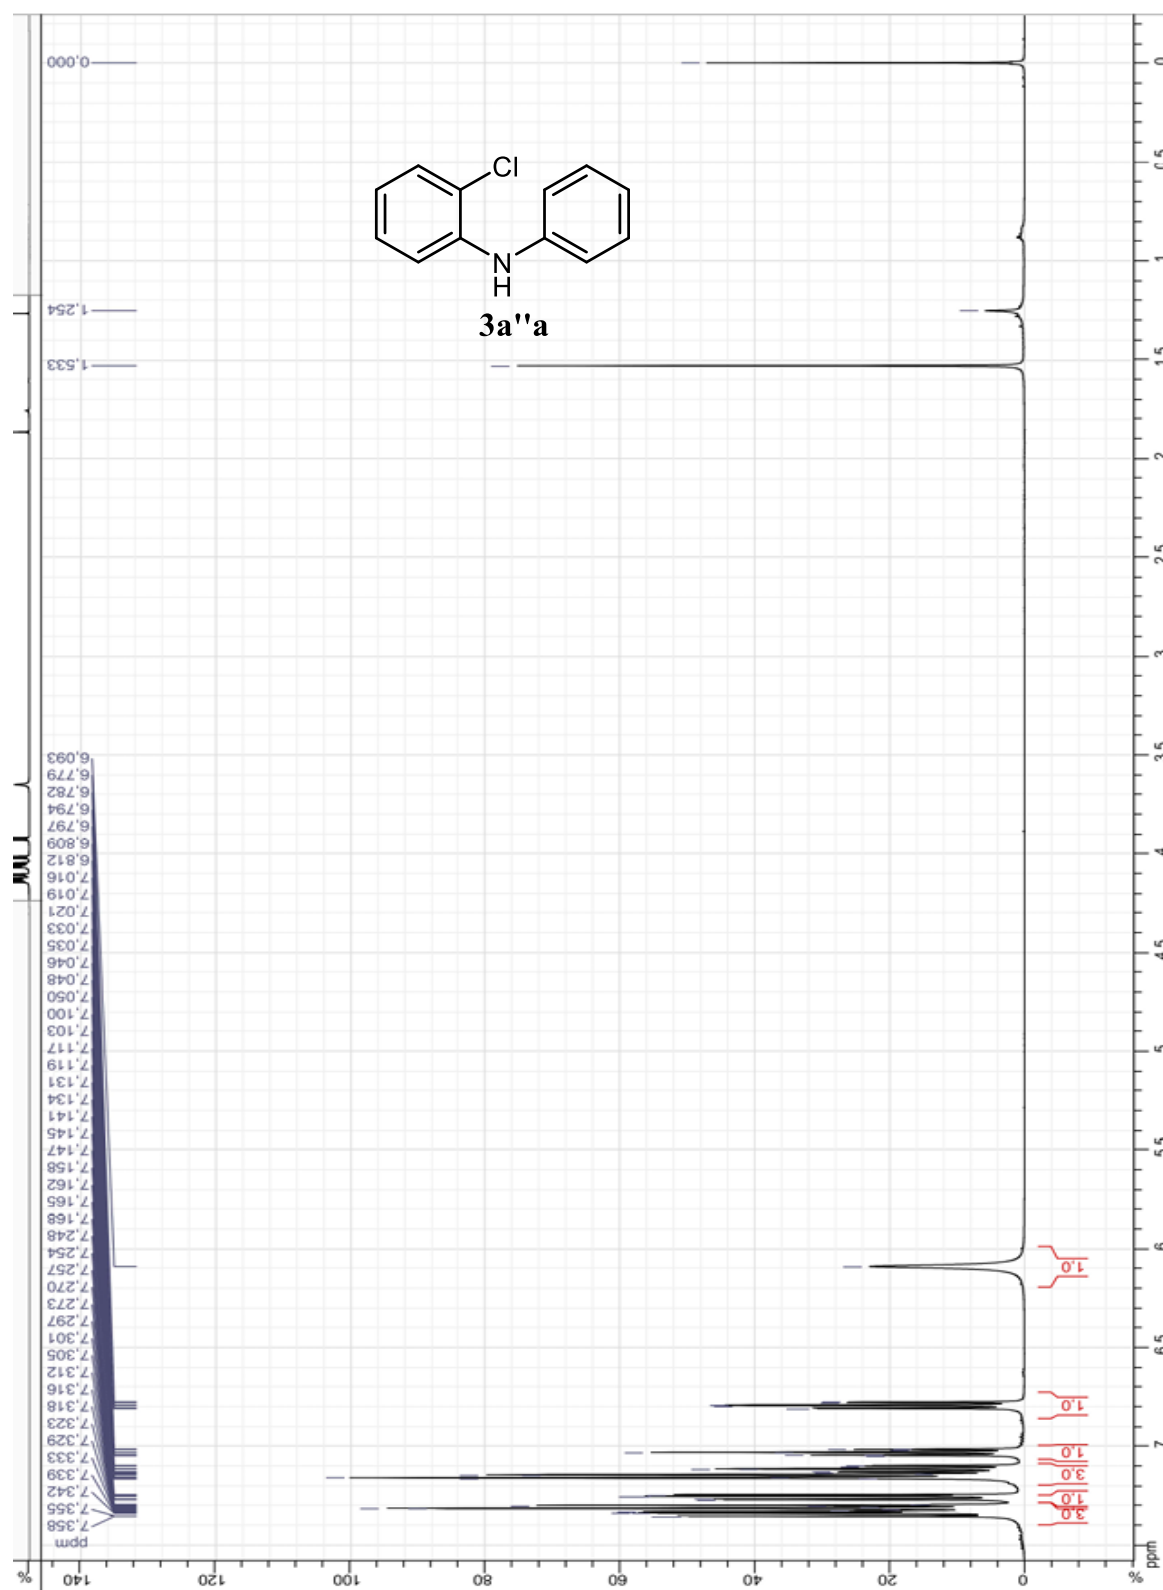

$^1\text{H}$  NMR spectrum of 2-iodo-4-methyl-*N*-phenylaniline (**3ba**) in  $\text{CDCl}_3$

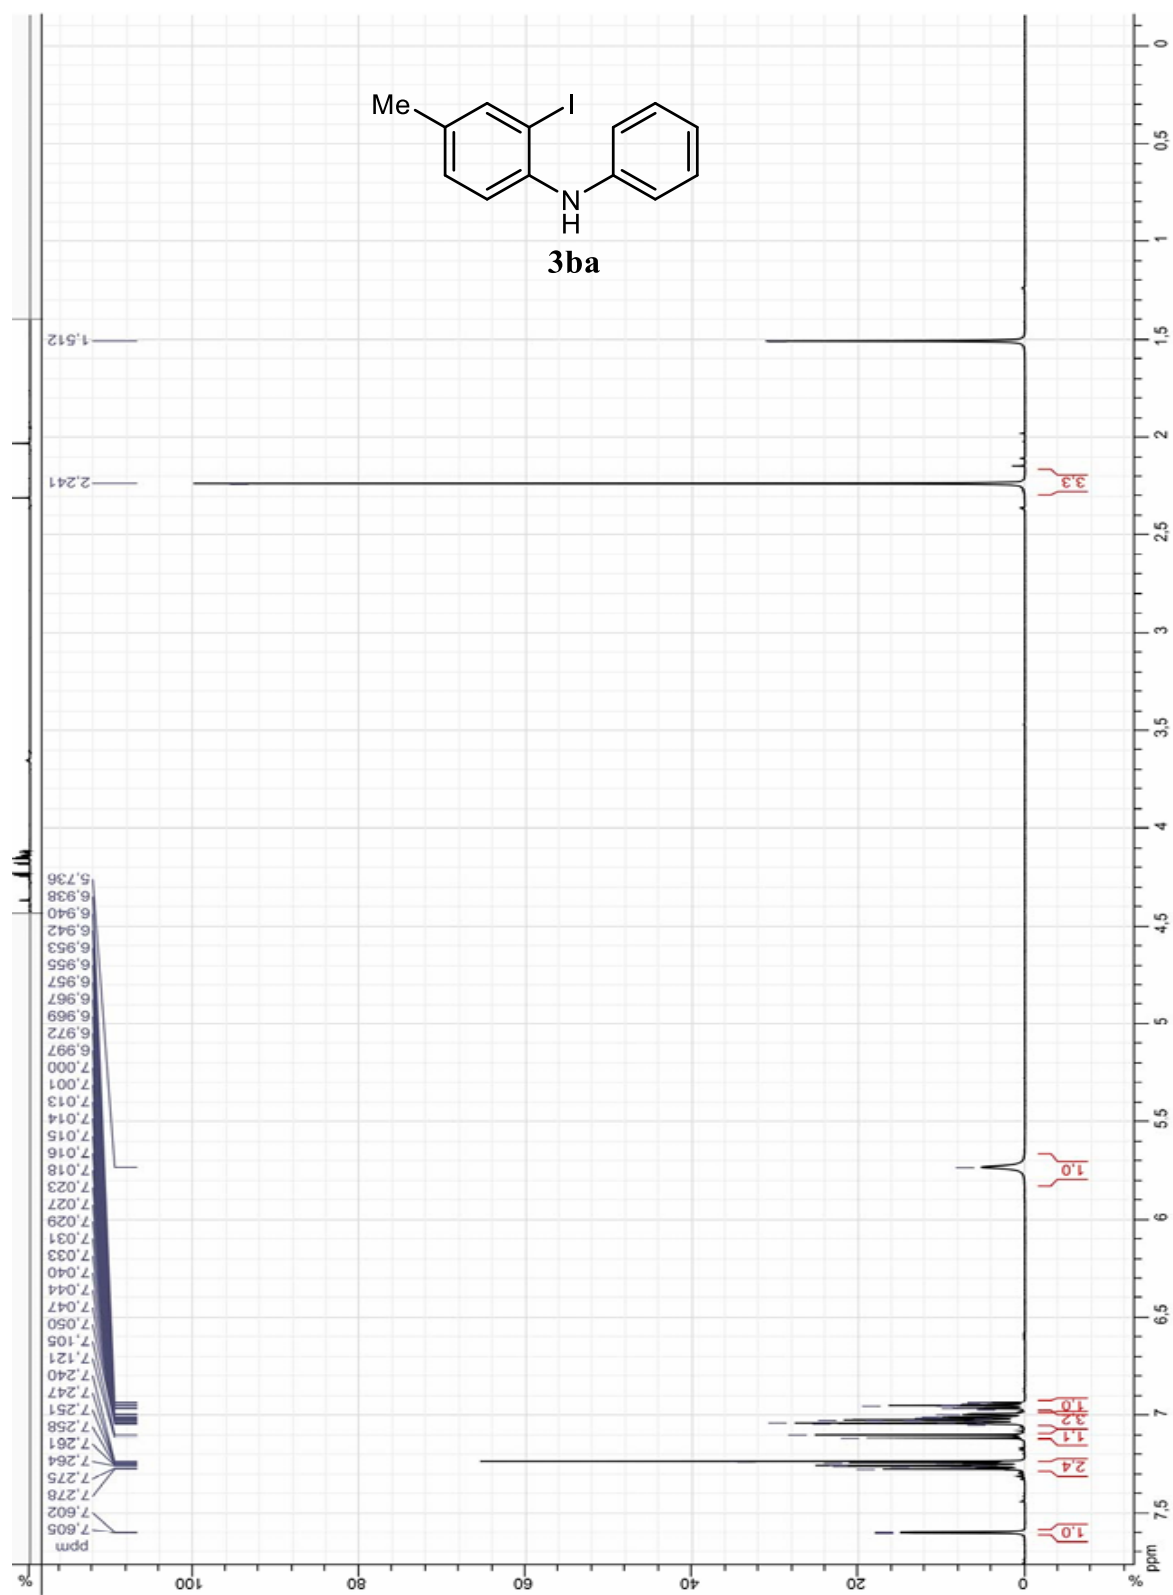

$^1\text{H}$  NMR spectrum of 4-(*tert*-butyl)-2-iodo-*N*-phenylaniline (**3ca**) in  $\text{CDCl}_3$

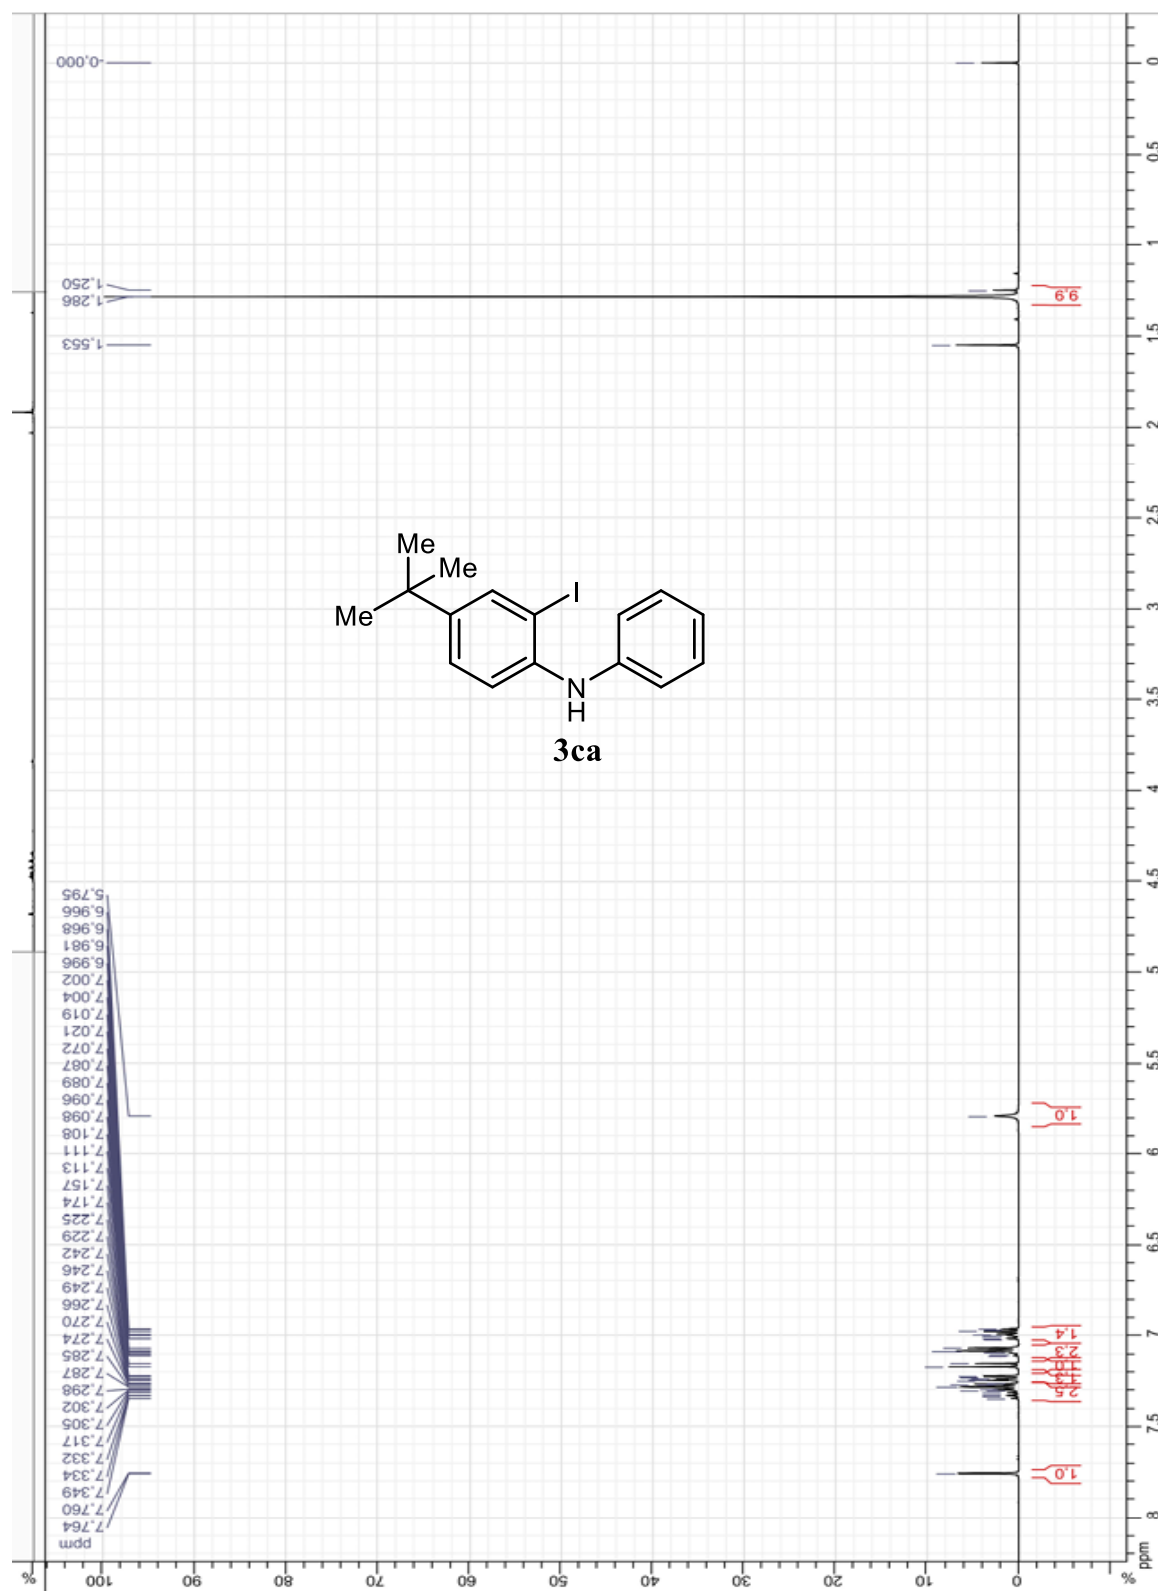



$^1\text{H}$  NMR and  $^{13}\text{C}$  spectra of 2-iodo-*N*-phenyl-4-(trifluoromethyl)aniline (**3da**) in  $\text{CDCl}_3$

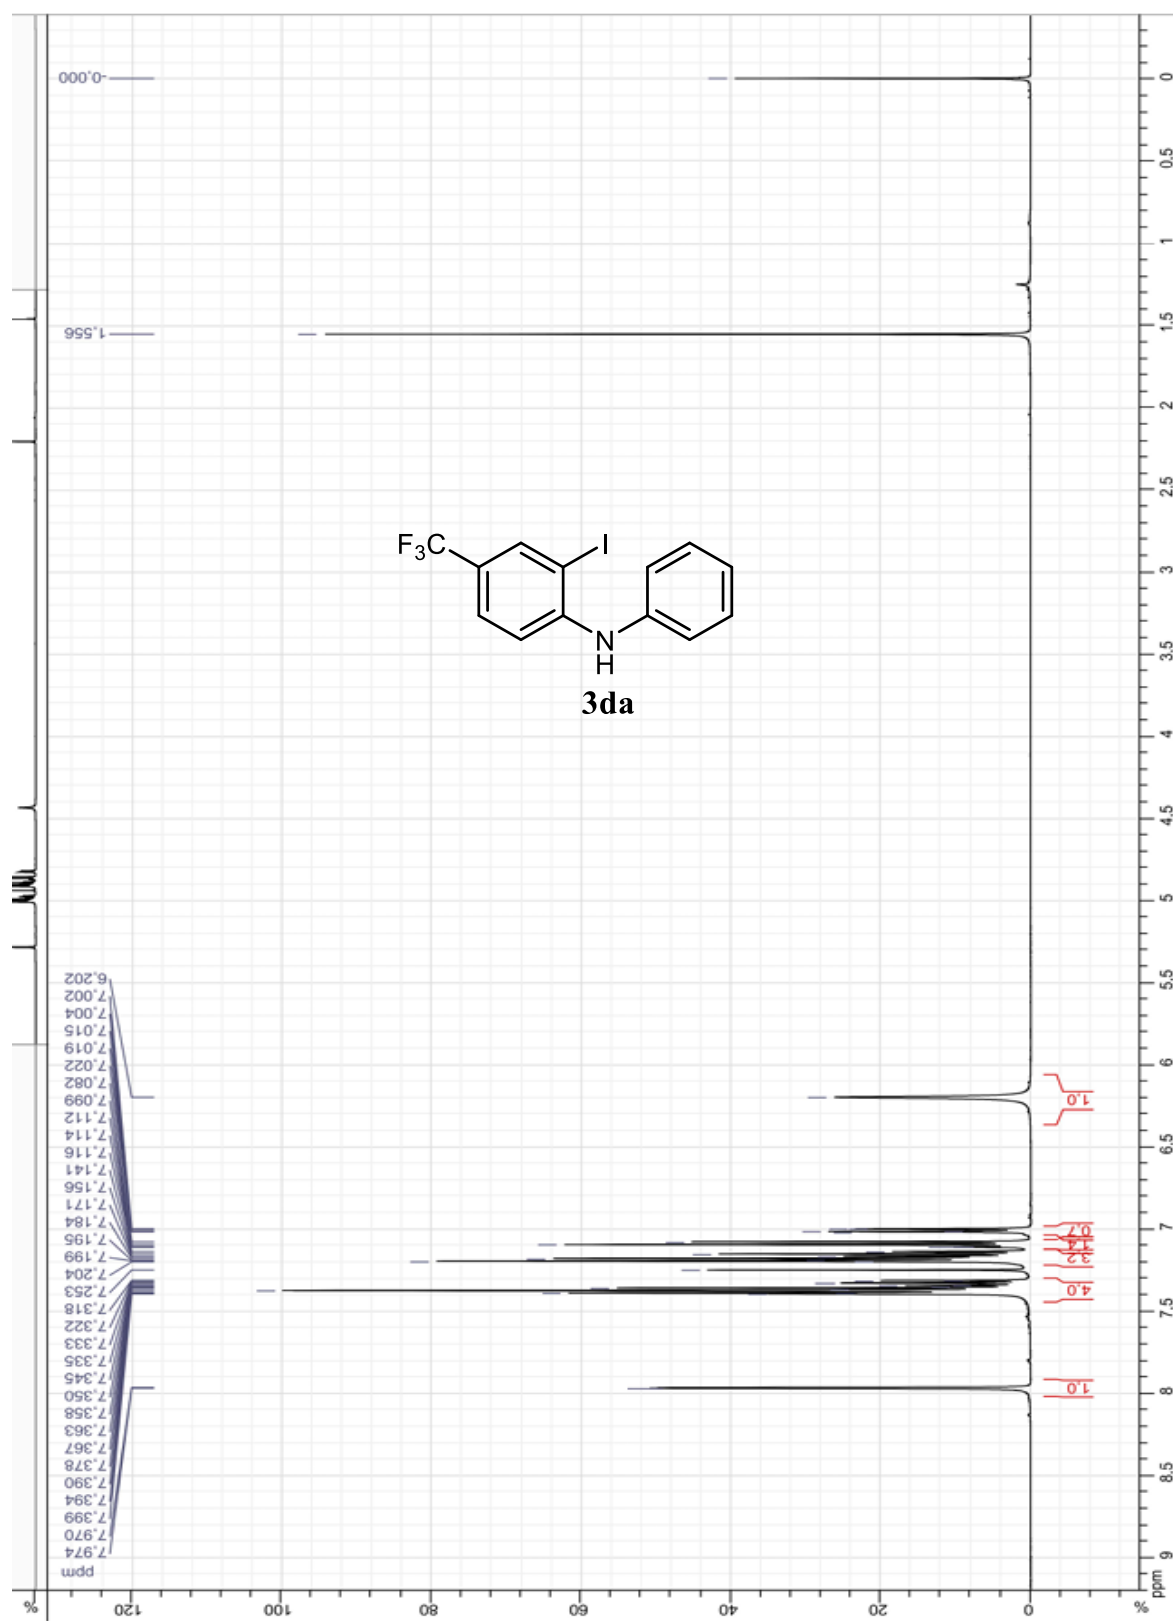

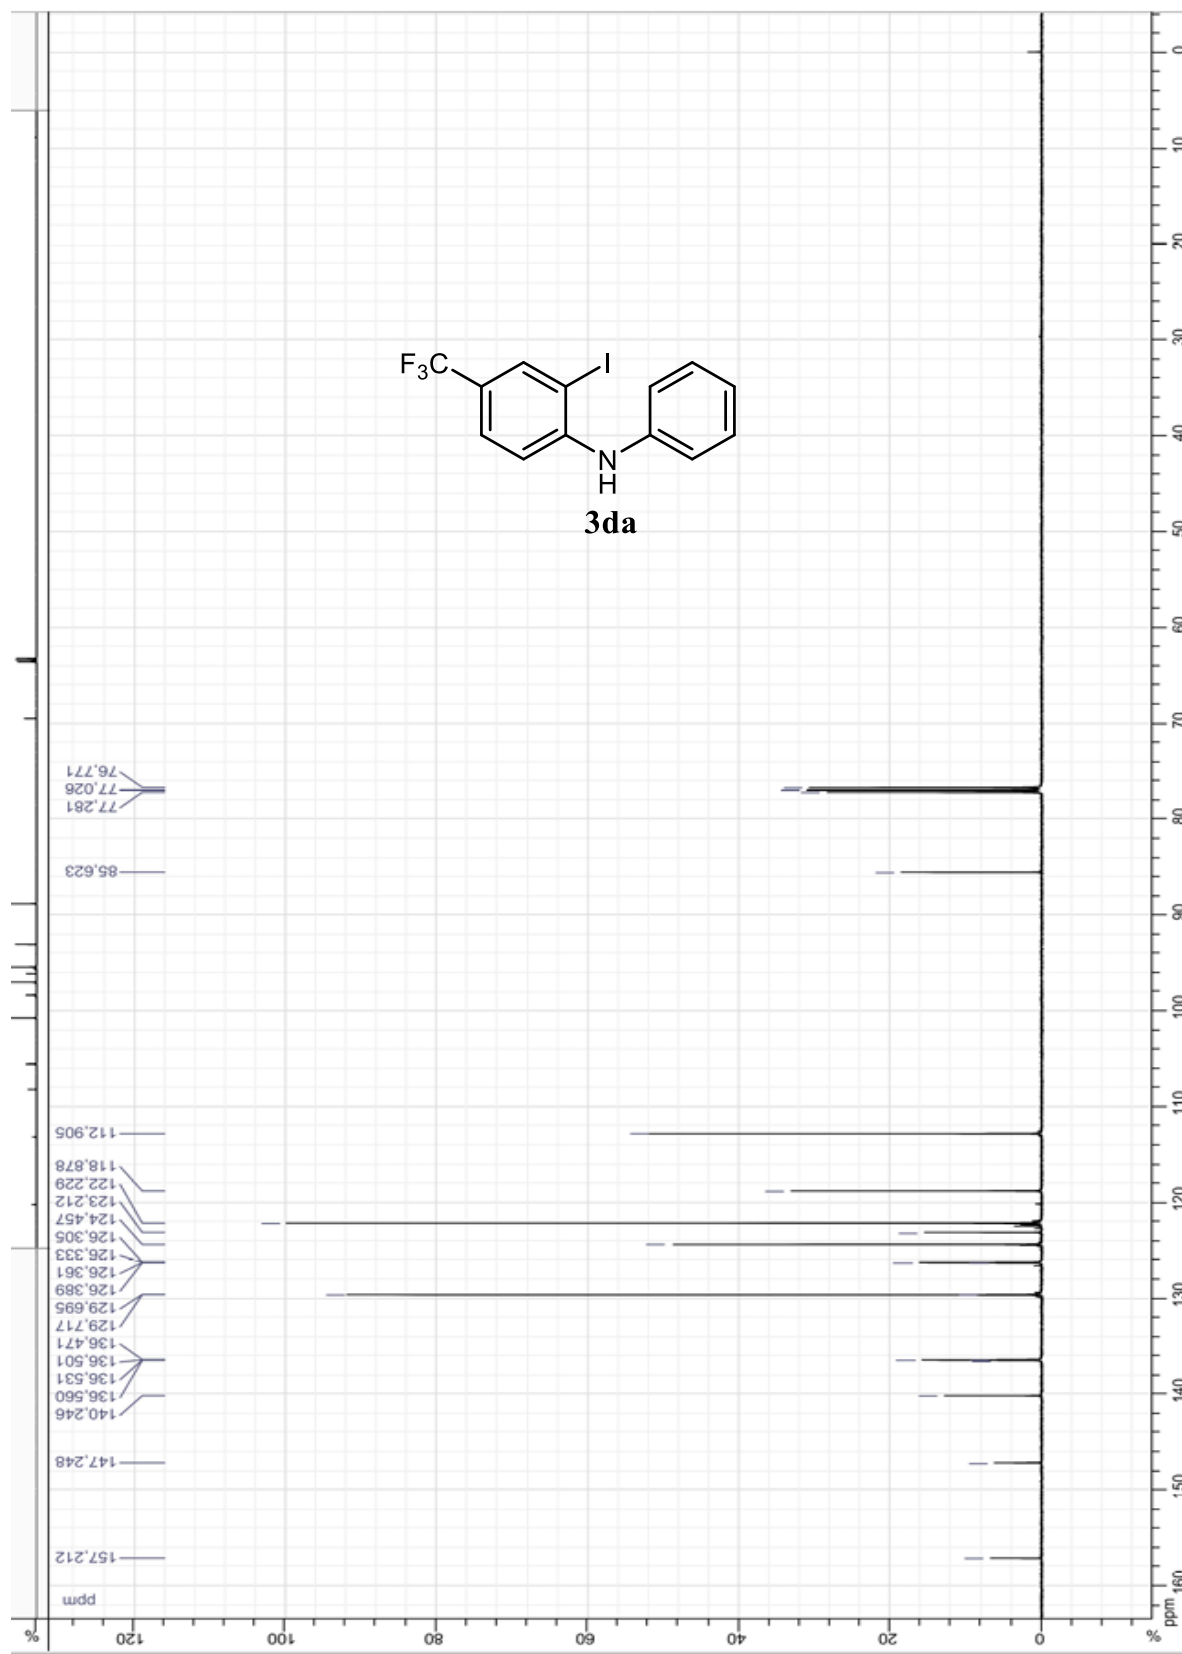



Chemical structure of **3ea** is shown: Nc1ccccc1c2cc(F)ccc2.

<sup>1</sup>H NMR spectrum (CDCl<sub>3</sub>) of **3ea** is displayed. The spectrum shows peaks at 7.519, 7.514, 7.504, 7.498, 7.302, 7.298, 7.295, 7.270, 7.266, 7.237, 7.167, 7.157, 7.149, 7.139, 7.022, 7.006, 7.001, 6.986, 6.981, 6.975, 6.972, 6.964, 6.959, 6.947, 6.942, 6.971 ppm. Integration values are 1.0, 2.1, 1.1, 4.1, 1.0, 1.0, 0.2, 0.1.

$^1\text{H}$  NMR spectrum of 4-chloro-2-iodo-*N*-phenylaniline (**3fa**) in  $\text{CDCl}_3$

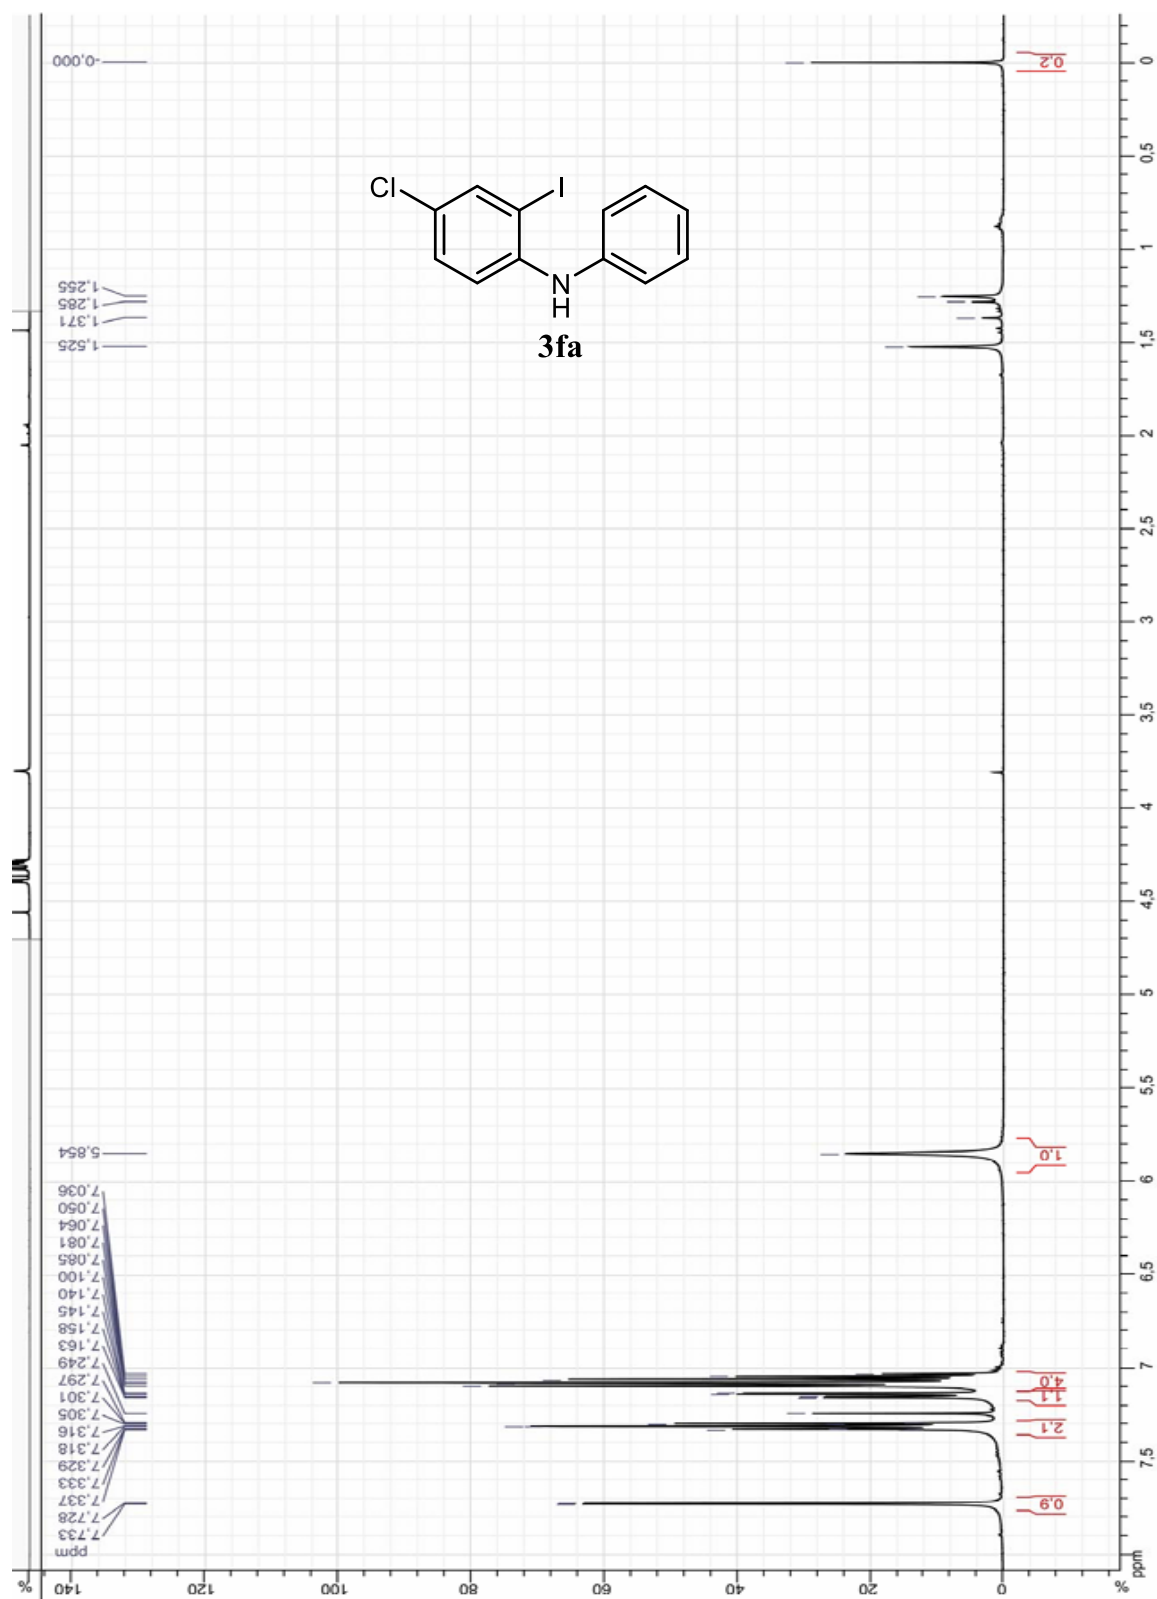

$^1\text{H}$  NMR spectrum of 4-bromo-2-iodo-*N*-phenylaniline (**3ga**) in  $\text{CDCl}_3$

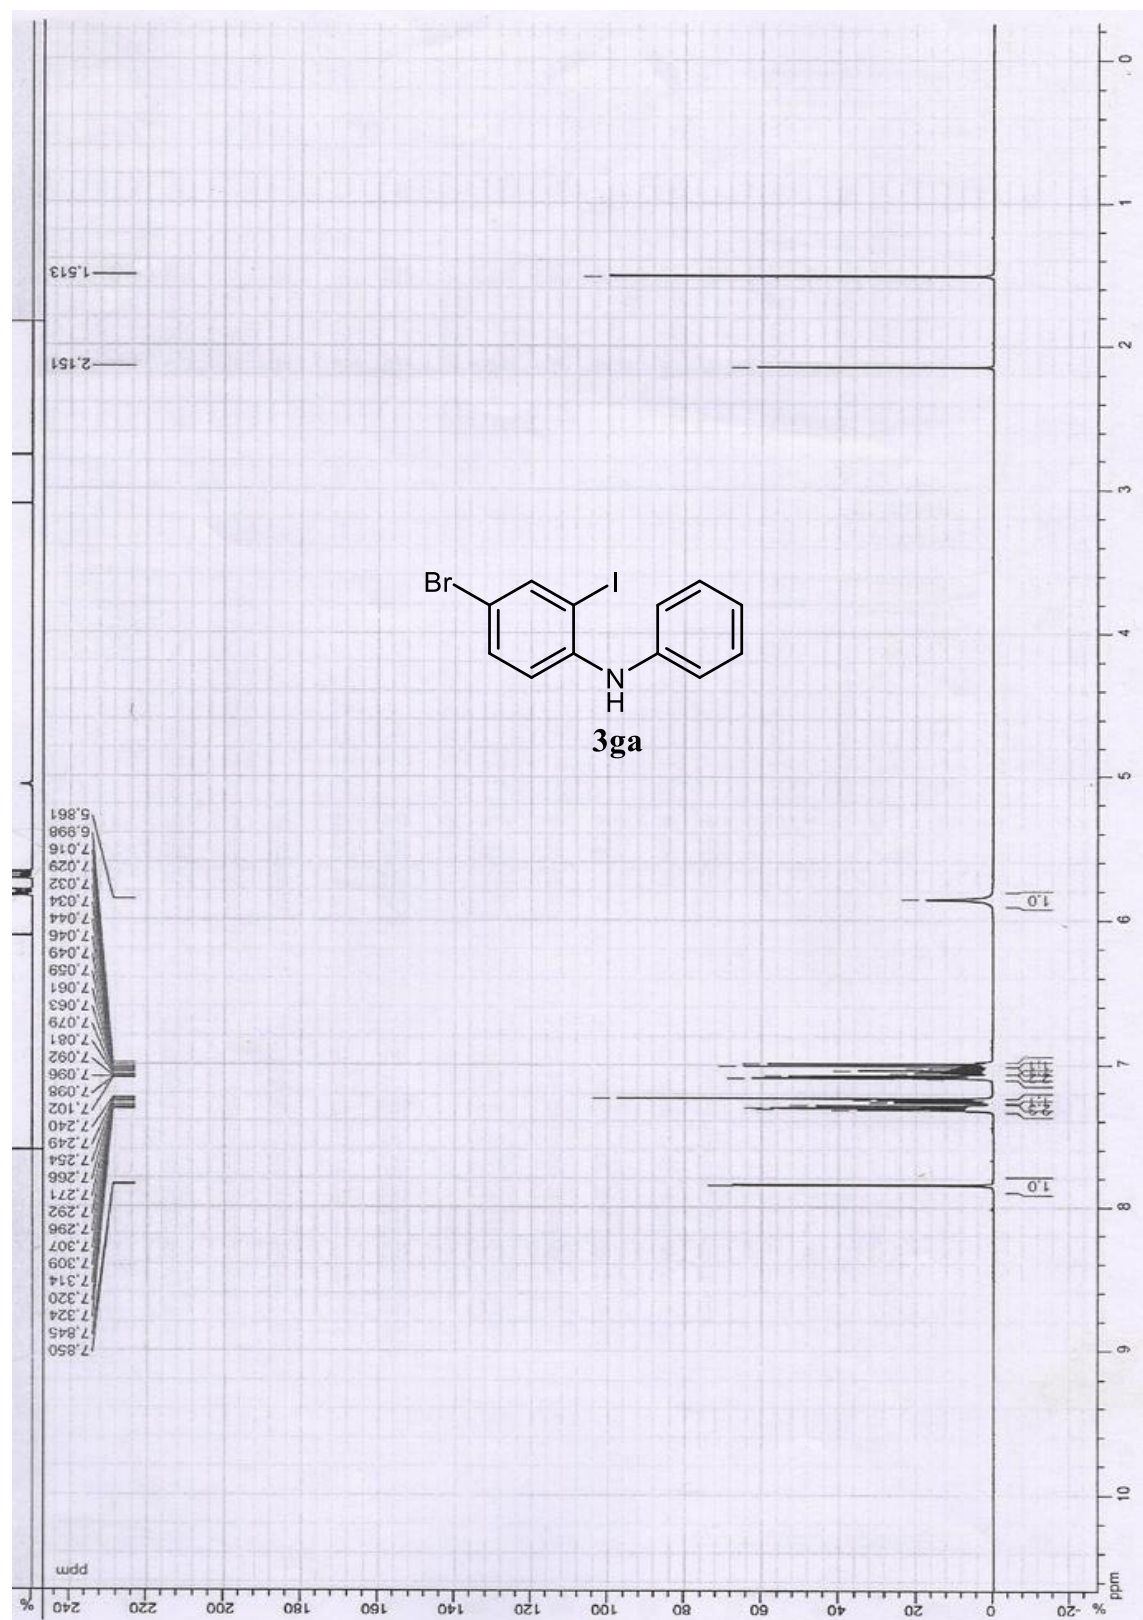

$^1\text{H}$  NMR spectrum of methyl 3-iodo-4-(phenylamino)benzoate (**3ha**) in  $\text{CDCl}_3$

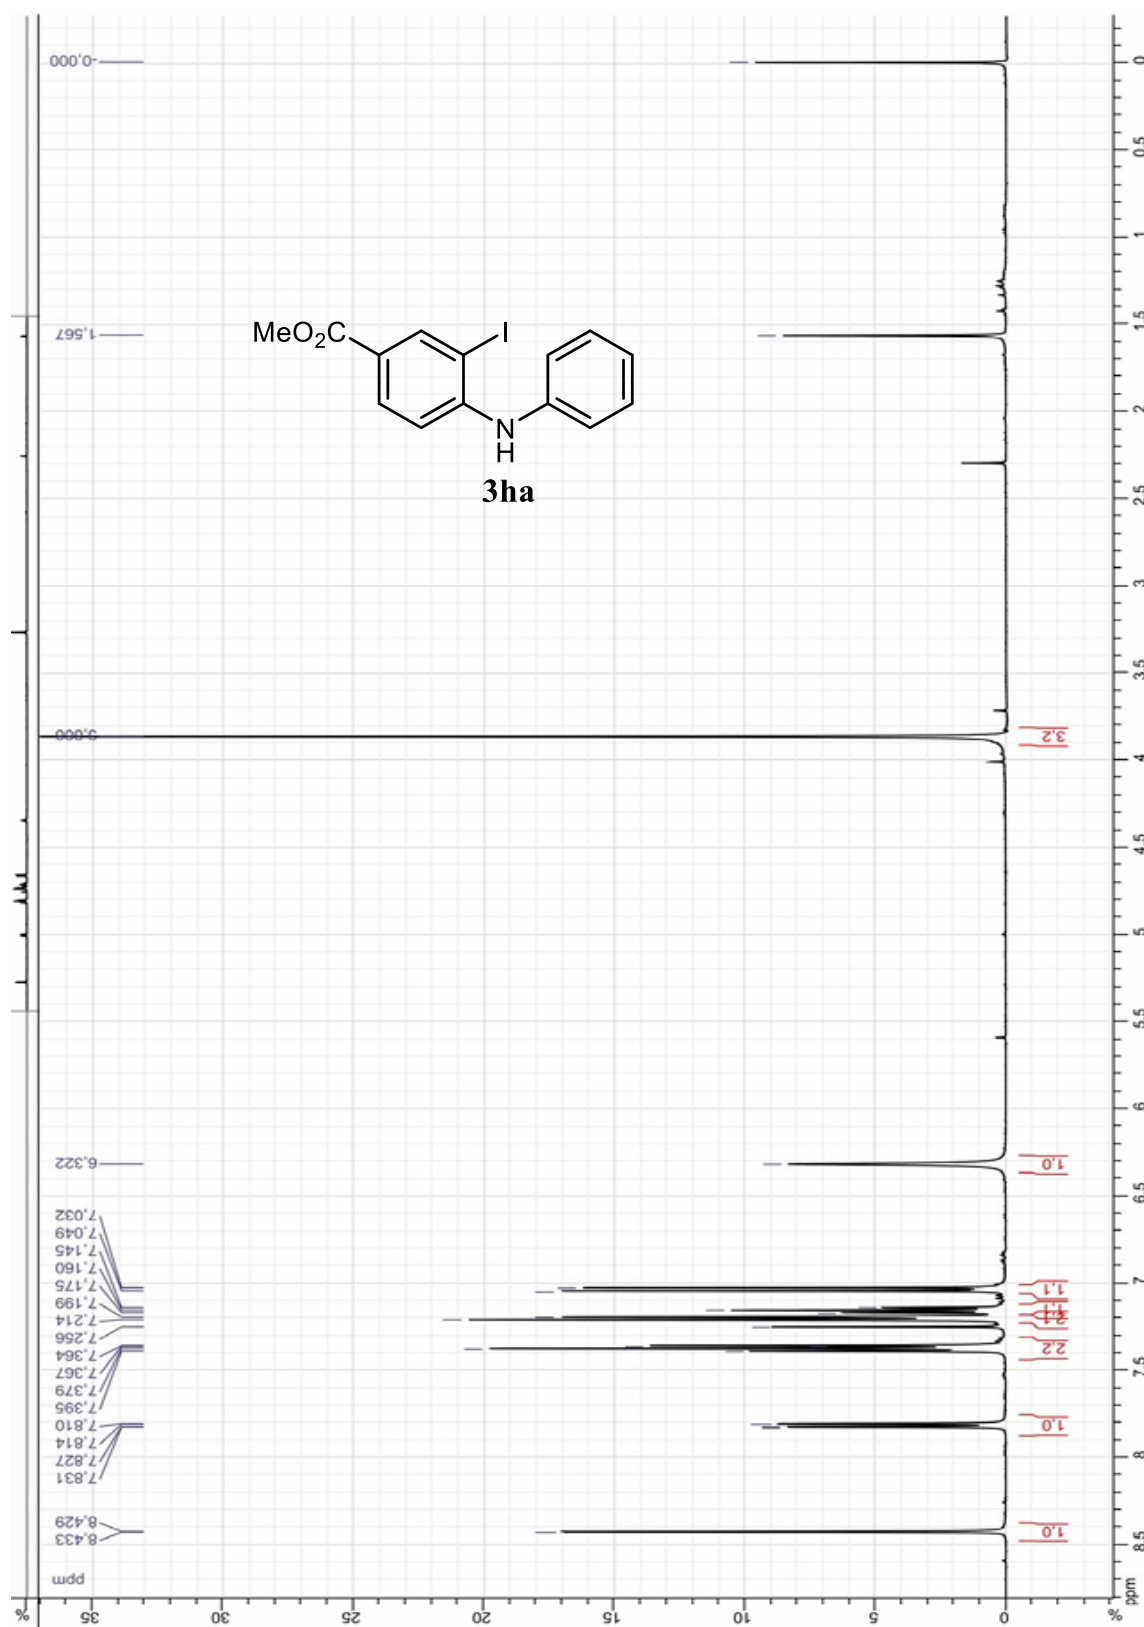

$^1\text{H}$  NMR spectrum of 2-iodo-4-nitro-*N*-phenylaniline (**3ia**) in  $\text{CDCl}_3$

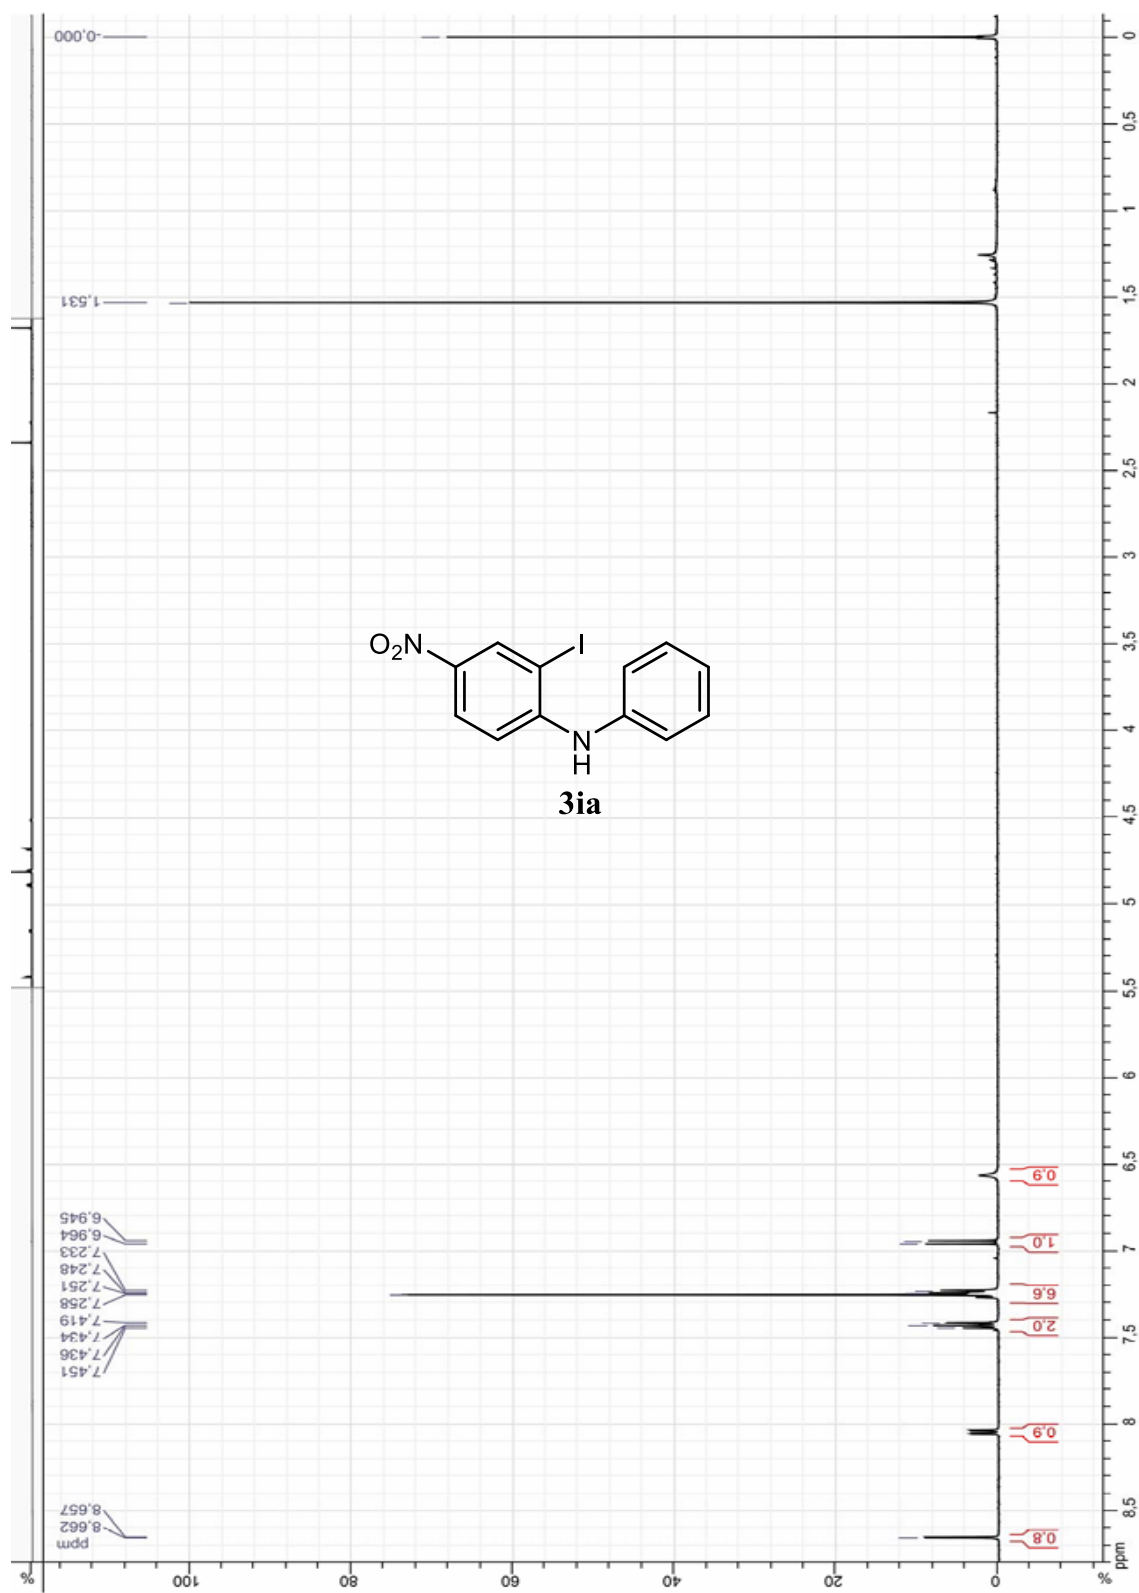

$^1\text{H}$  NMR spectrum of 2-iodo-5-methyl-*N*-phenylaniline (**3ja**) in  $\text{CDCl}_3$

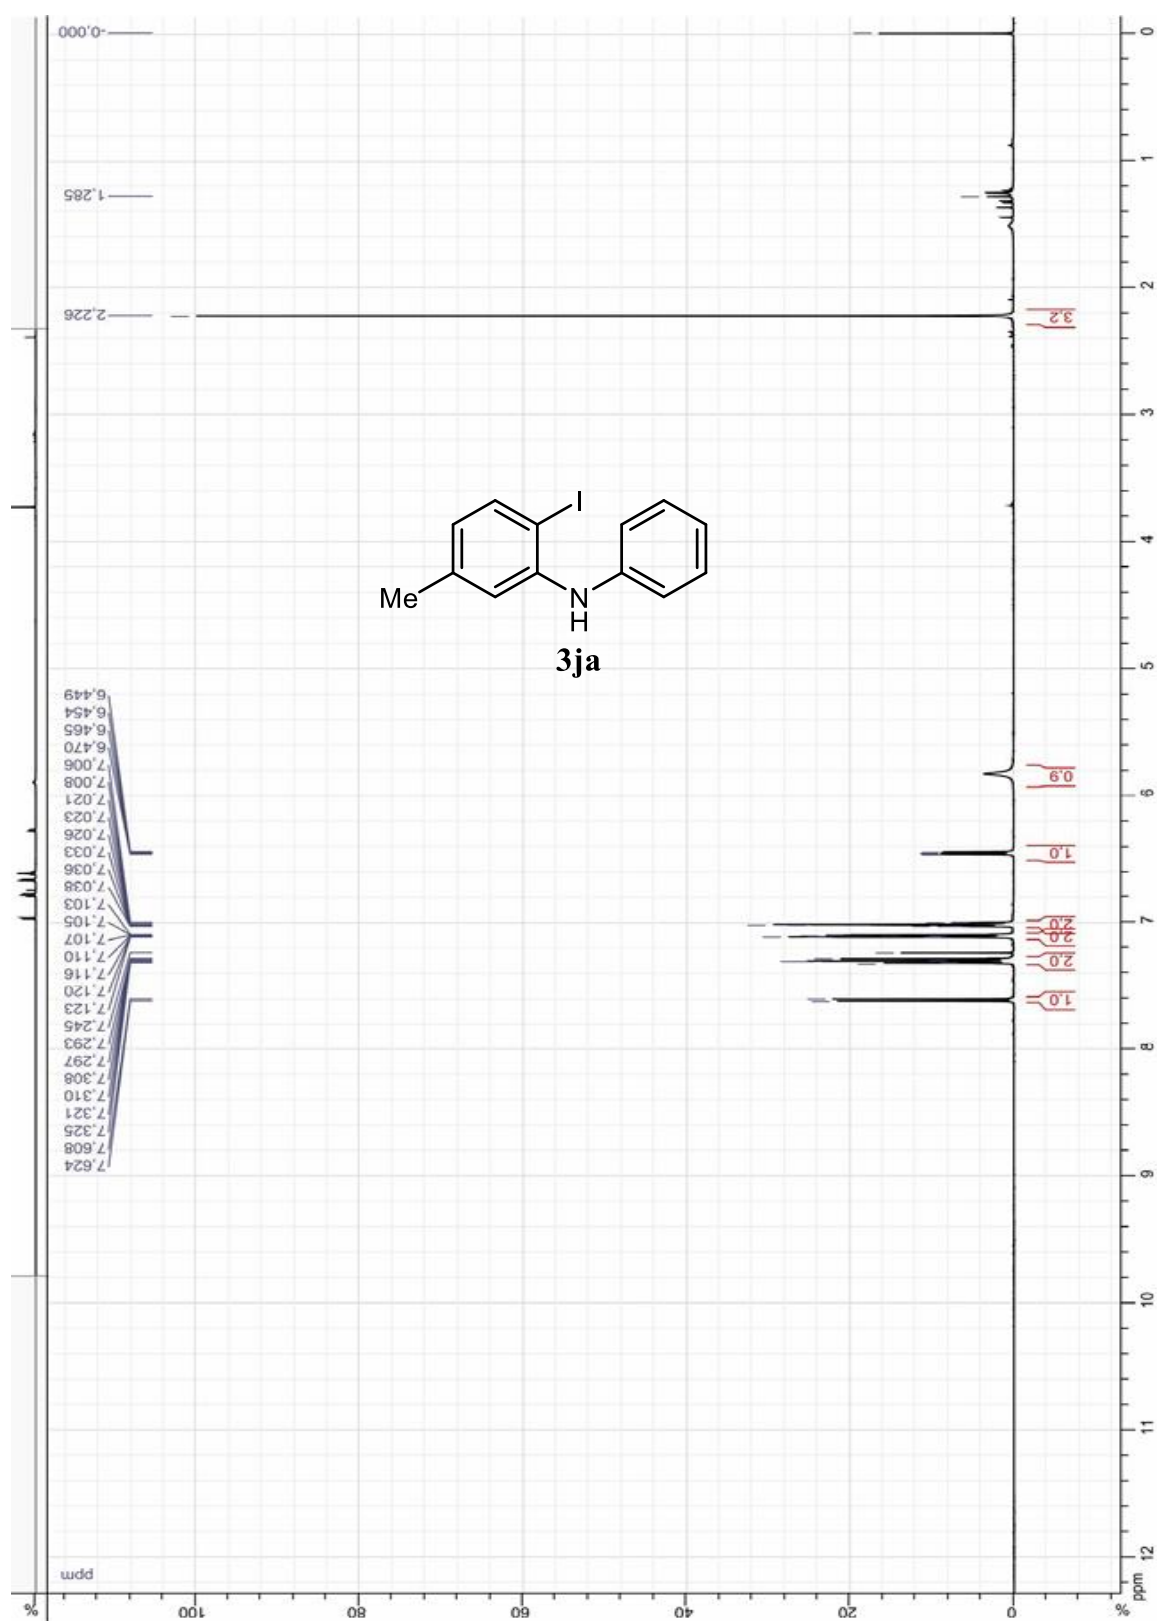

$^1\text{H}$  NMR spectra of 2-Iodo-*N*-(*p*-tolyl)aniline (**3ab**) in  $\text{CDCl}_3$

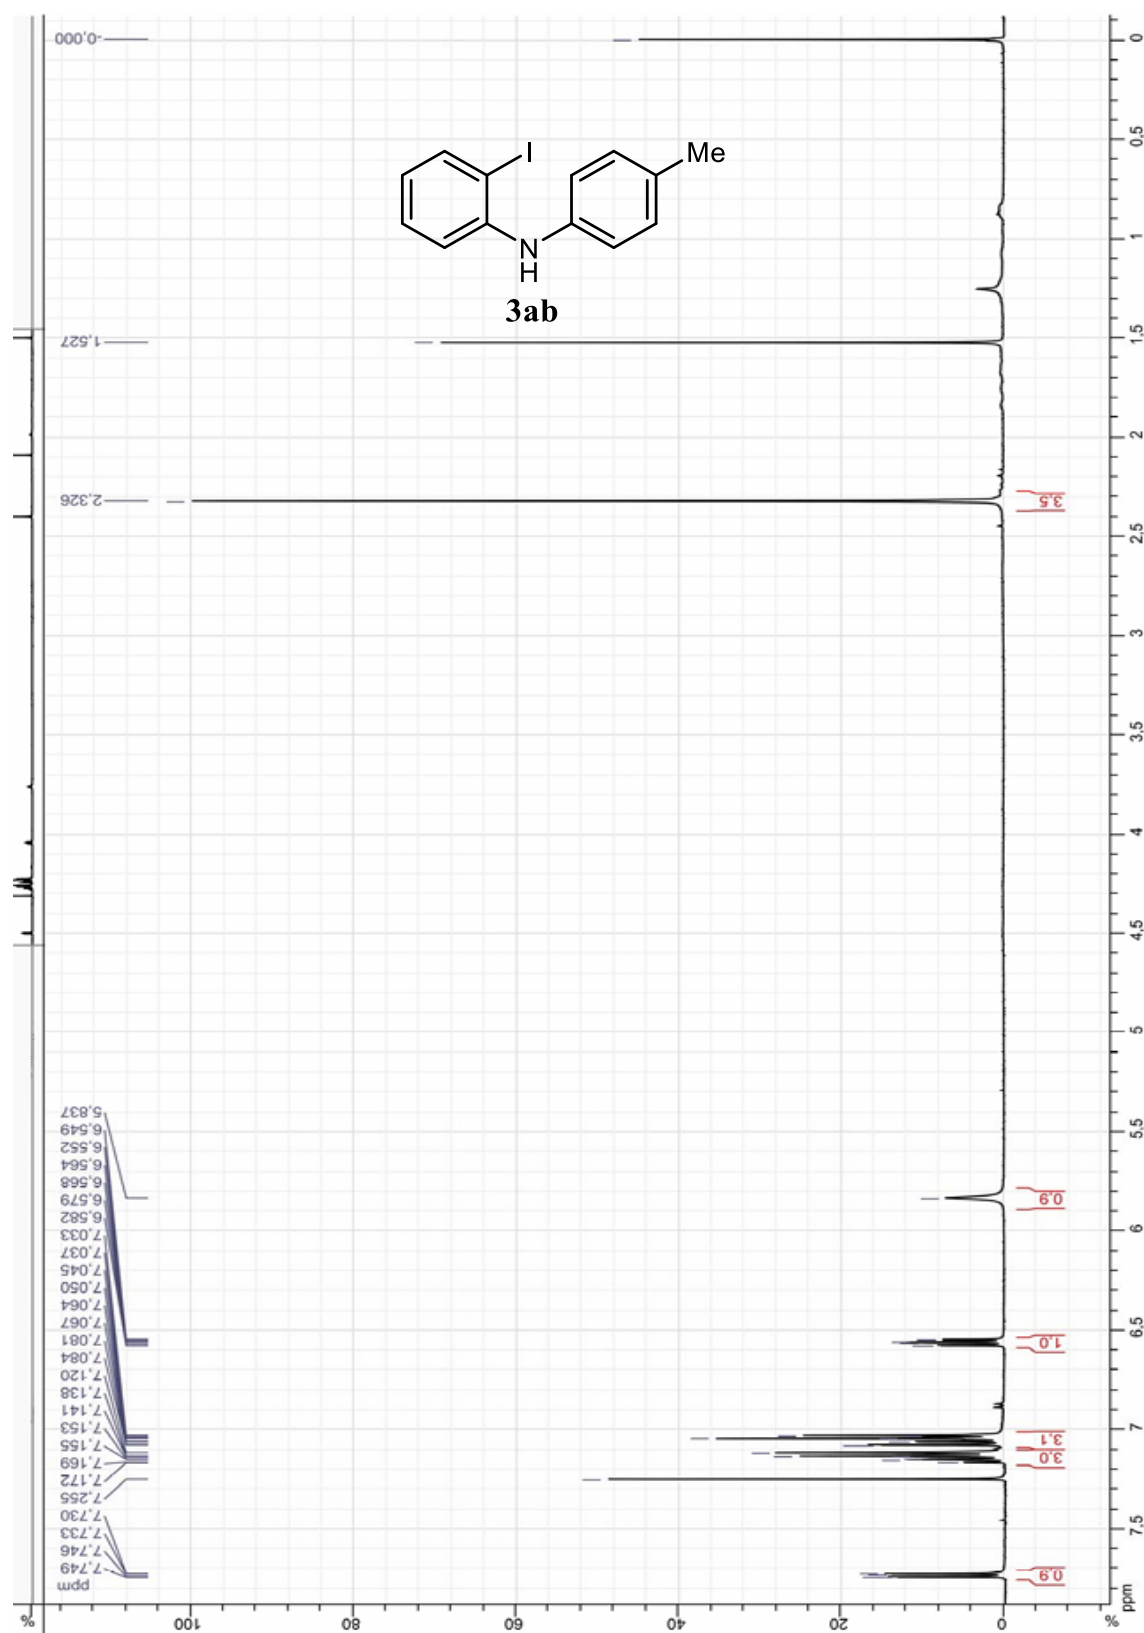



$^1\text{H}$  NMR spectrum of *N*-(4-fluorophenyl)-2-iodoaniline (**3ac**) in  $\text{CDCl}_3$

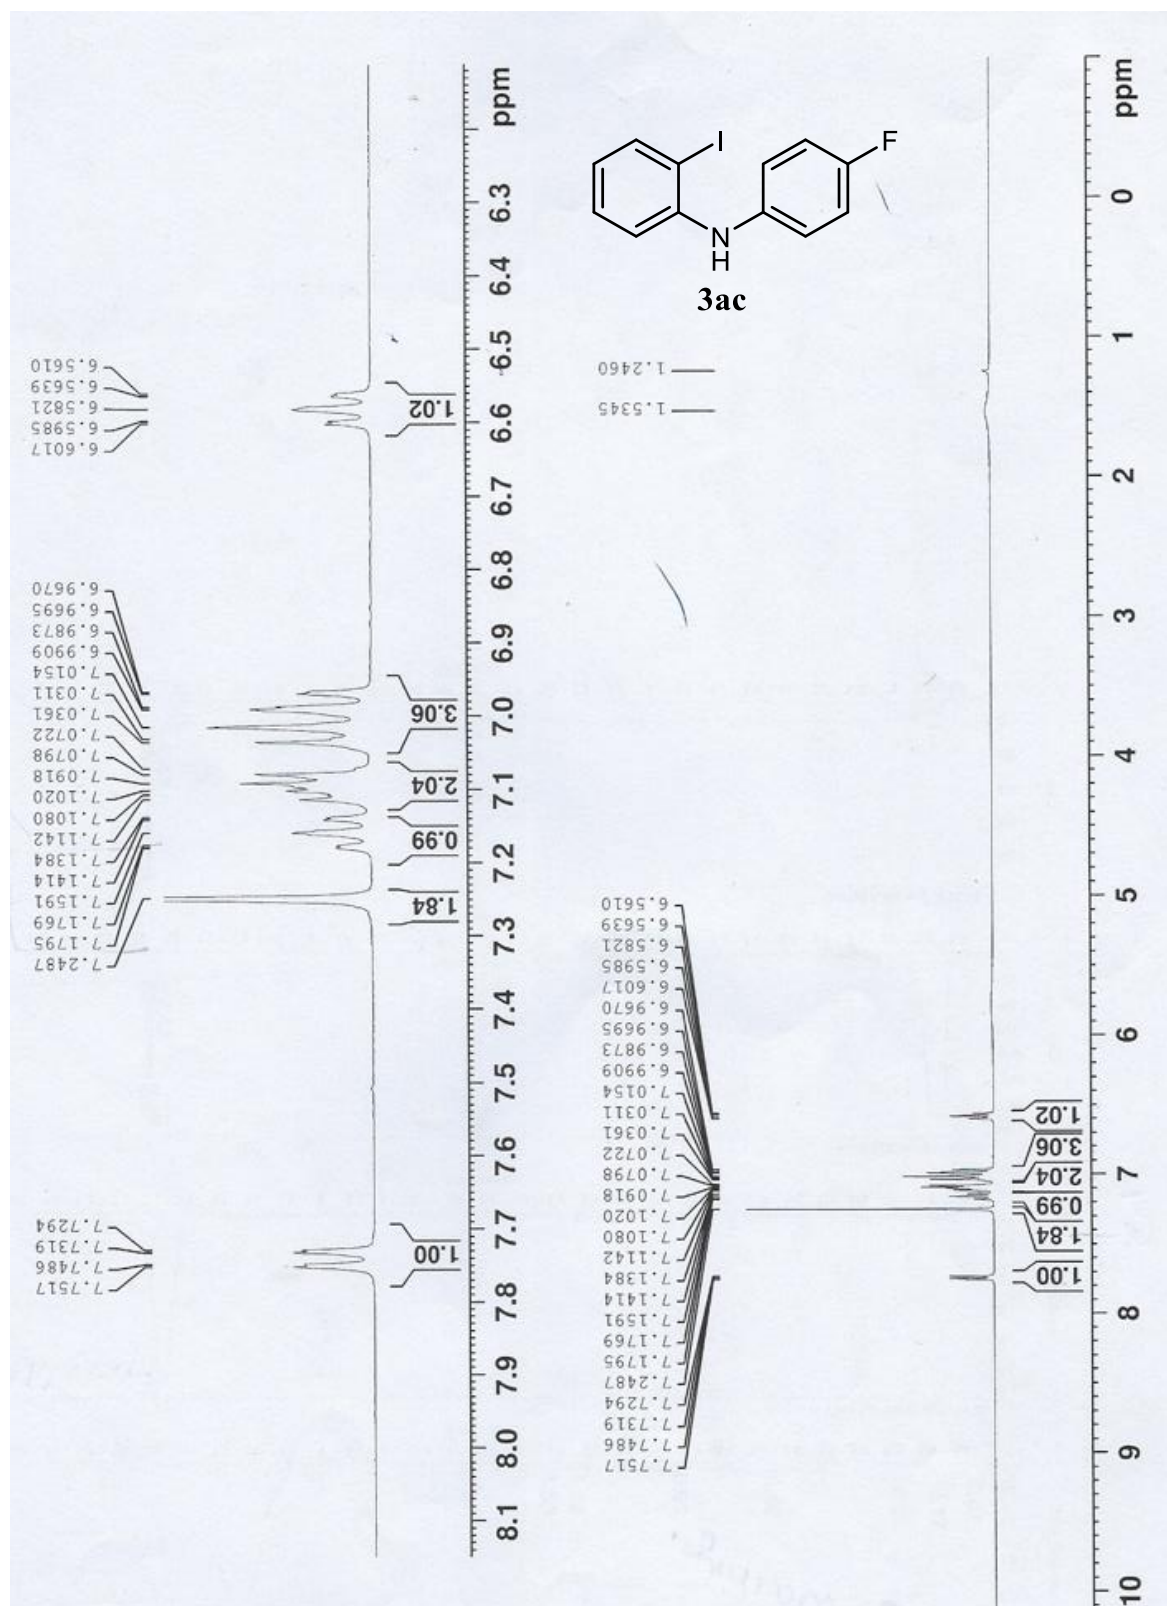



$^1\text{H}$  NMR and  $^{13}\text{C}$  spectra of *N*-(4-chlorophenyl)-2-iodoaniline (**3ad**) in  $\text{CDCl}_3$

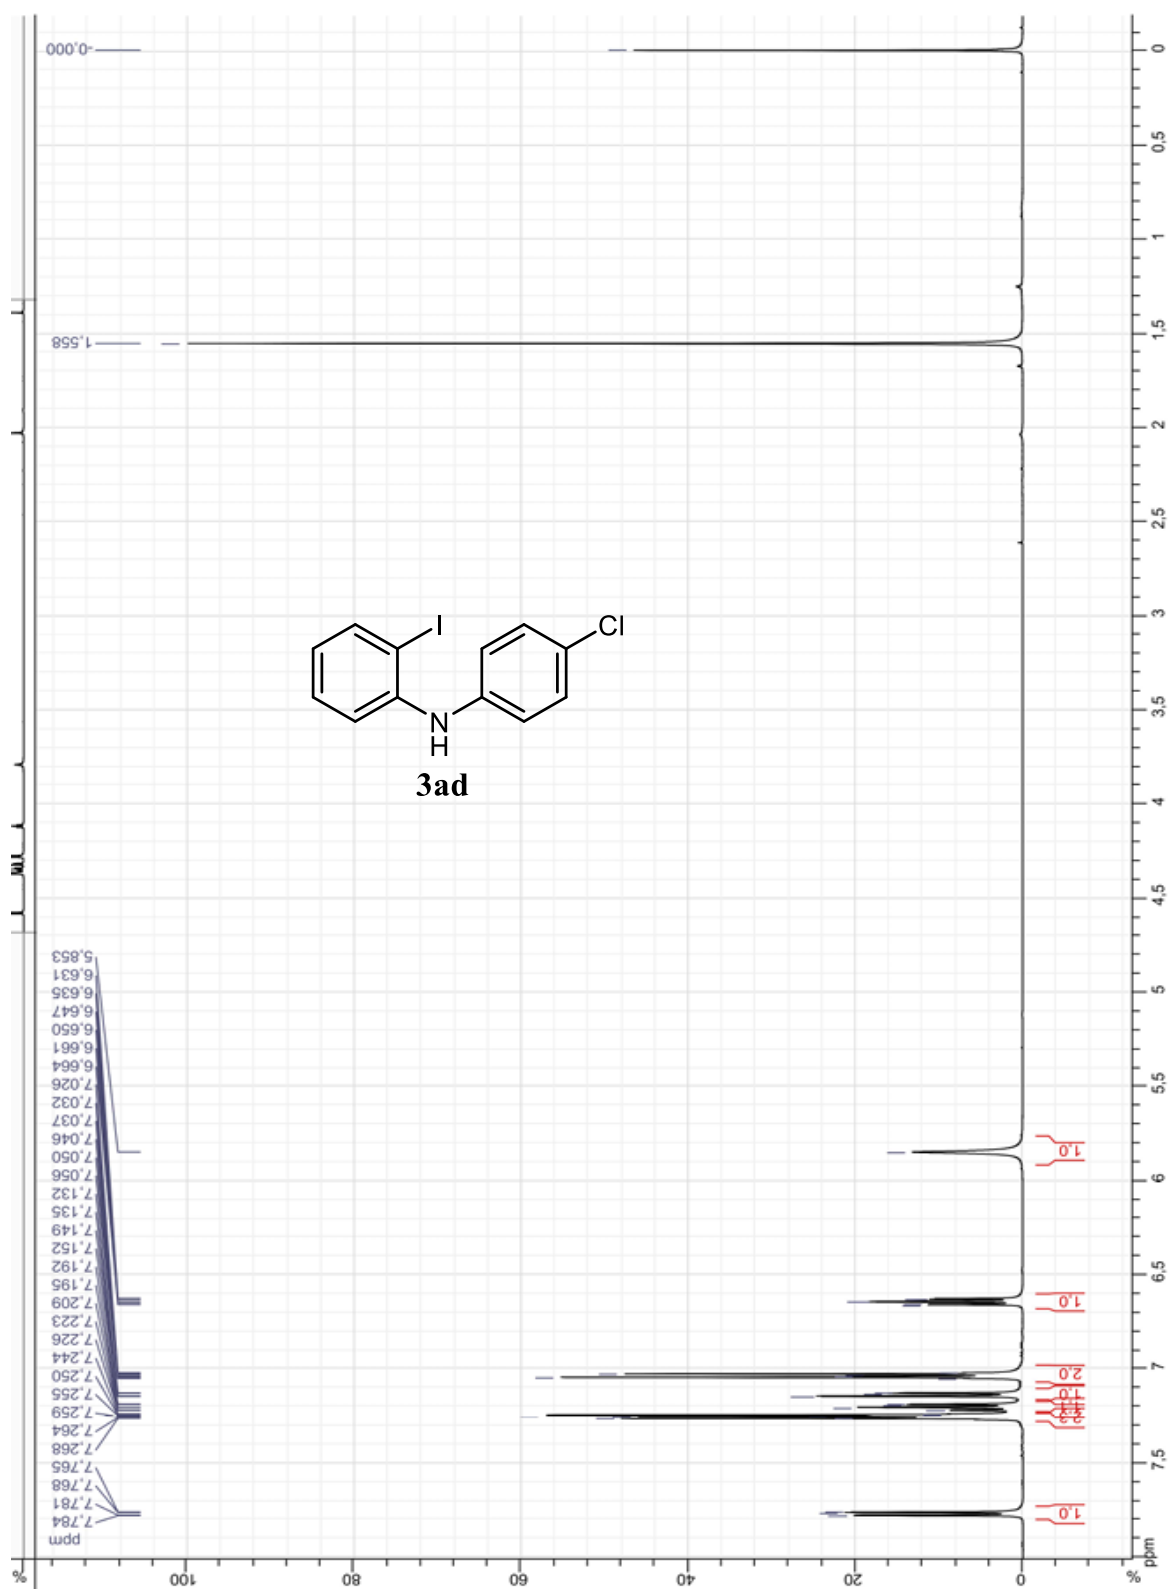

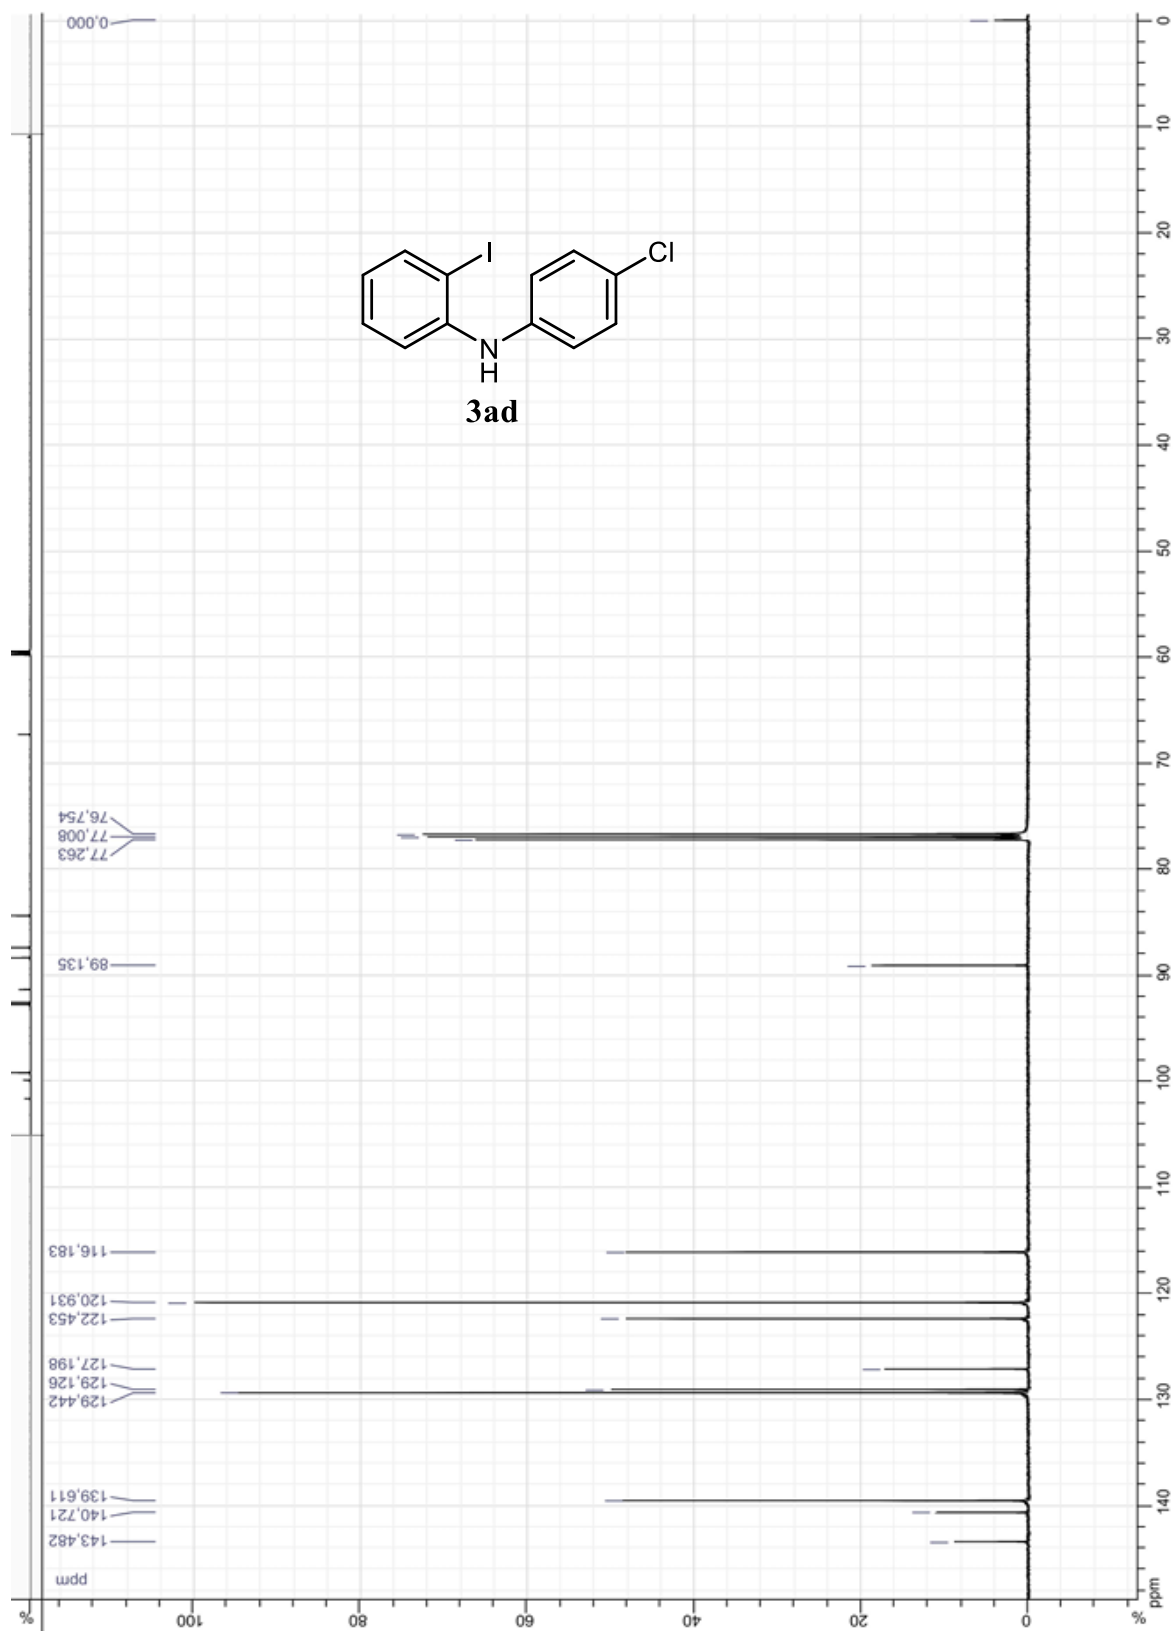

$^1\text{H}$  NMR spectrum of *N*-(4-bromophenyl)-2-iodoaniline (**3ae**) in  $\text{CDCl}_3$

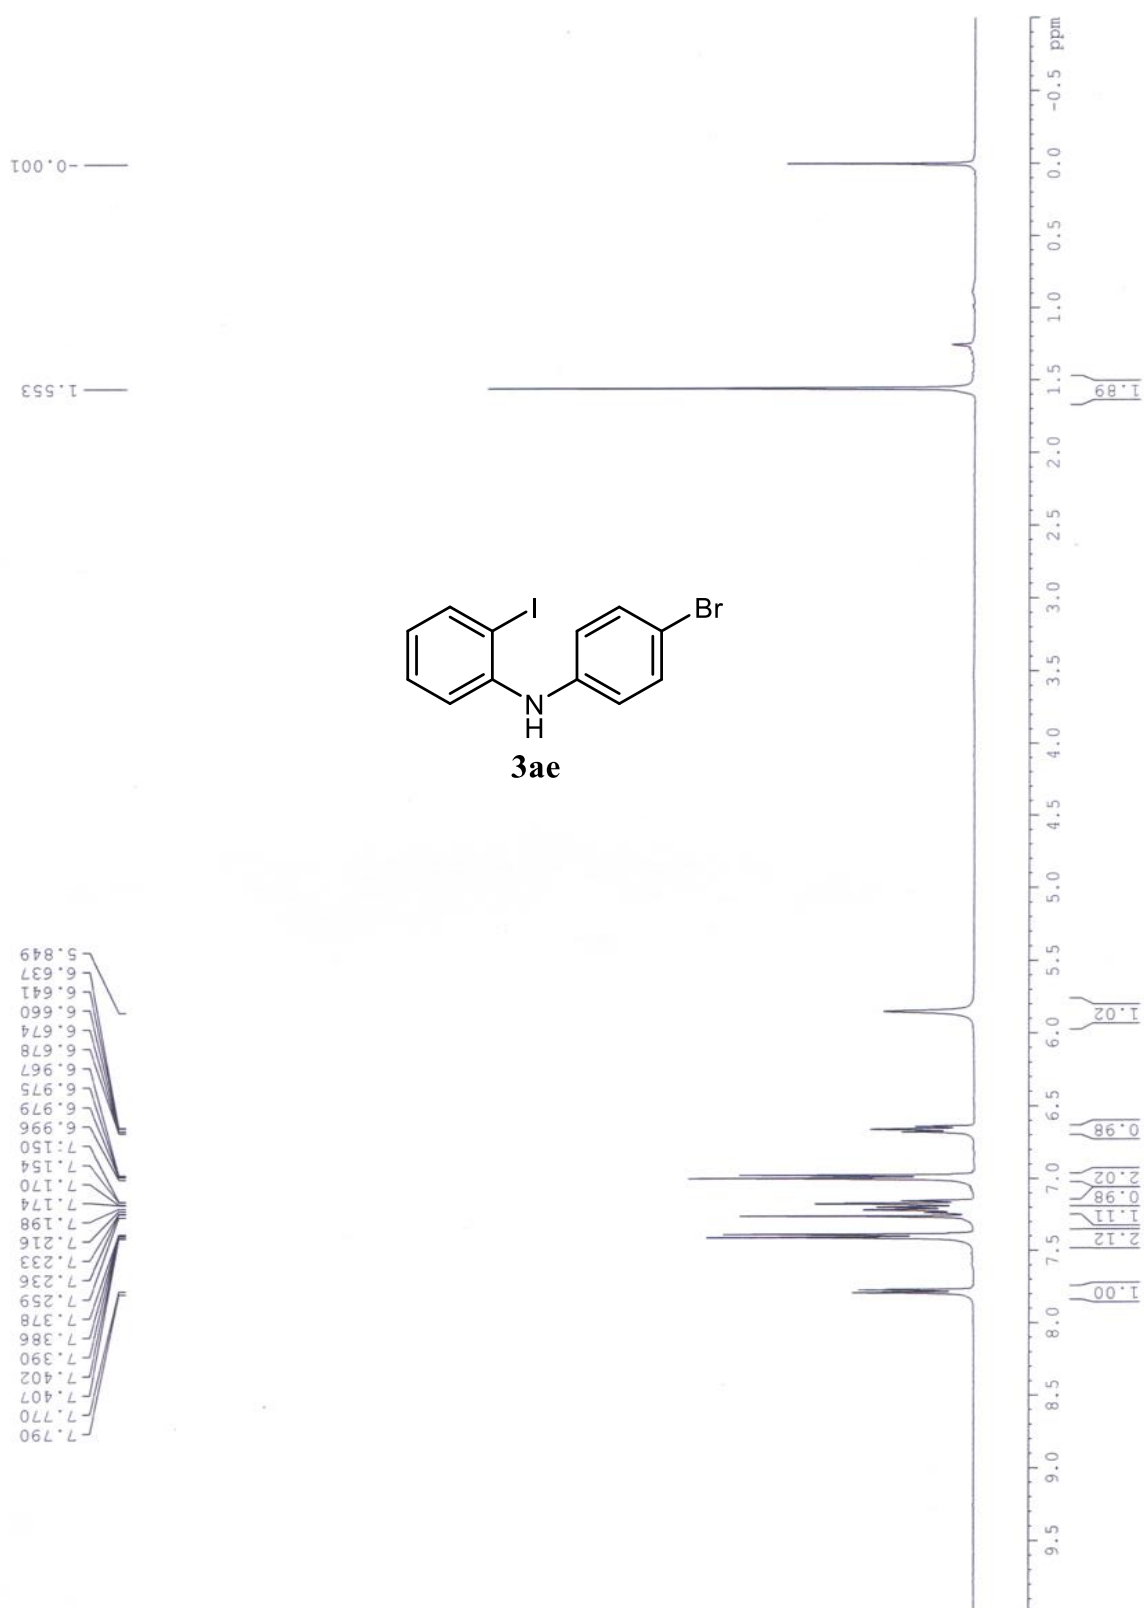

Chemical structure of **3af** is shown: COC(=O)c1ccc(Nc2ccccc2I)cc1.

<sup>1</sup>H NMR spectrum (CDCl<sub>3</sub>) of **3af** is displayed. The x-axis represents chemical shift in ppm (0 to 10), and the y-axis represents intensity (%). Integration values are provided for several peaks: 3.3 (0.9H), 3.885 (3H), 1.0 (1.0H), 2.0 (2.0H), 1.0 (1.0H), 1.0 (1.0H), 1.0 (1.0H), and 2.0 (2.0H). A list of peak chemical shifts is provided on the left: 6.070, 6.751, 6.754, 6.766, 6.769, 6.781, 6.784, 7.020, 7.024, 7.034, 7.037, 7.257, 7.274, 7.291, 7.295, 7.308, 7.364, 7.367, 7.380, 7.383, 7.824, 7.827, 7.840, 7.843, 7.941, 7.945, 7.955, 7.959 ppm.

$^1\text{H}$  NMR spectrum of 2-iodo-*N*-(4-methoxyphenyl)aniline (**3ag**) in  $\text{CDCl}_3$

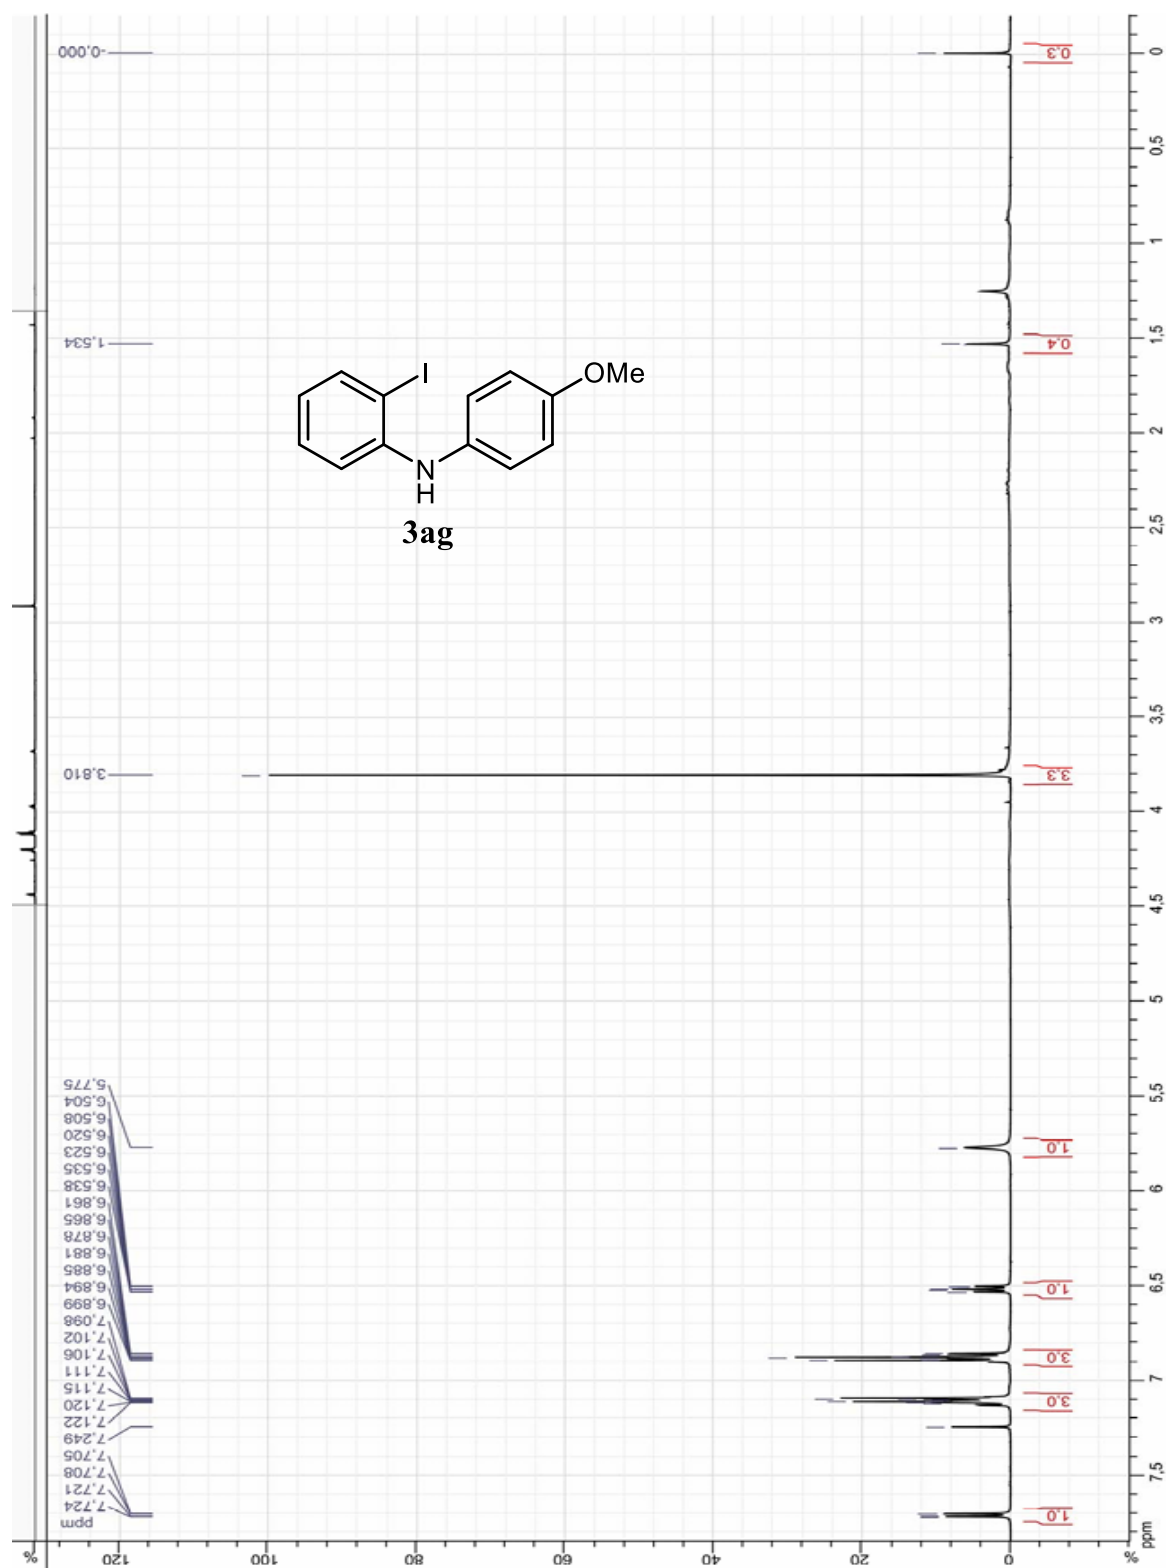

$^1\text{H}$  NMR spectrum of 2-iodo-*N*-(3-methoxyphenyl)aniline (**3ah**) in  $\text{CDCl}_3$

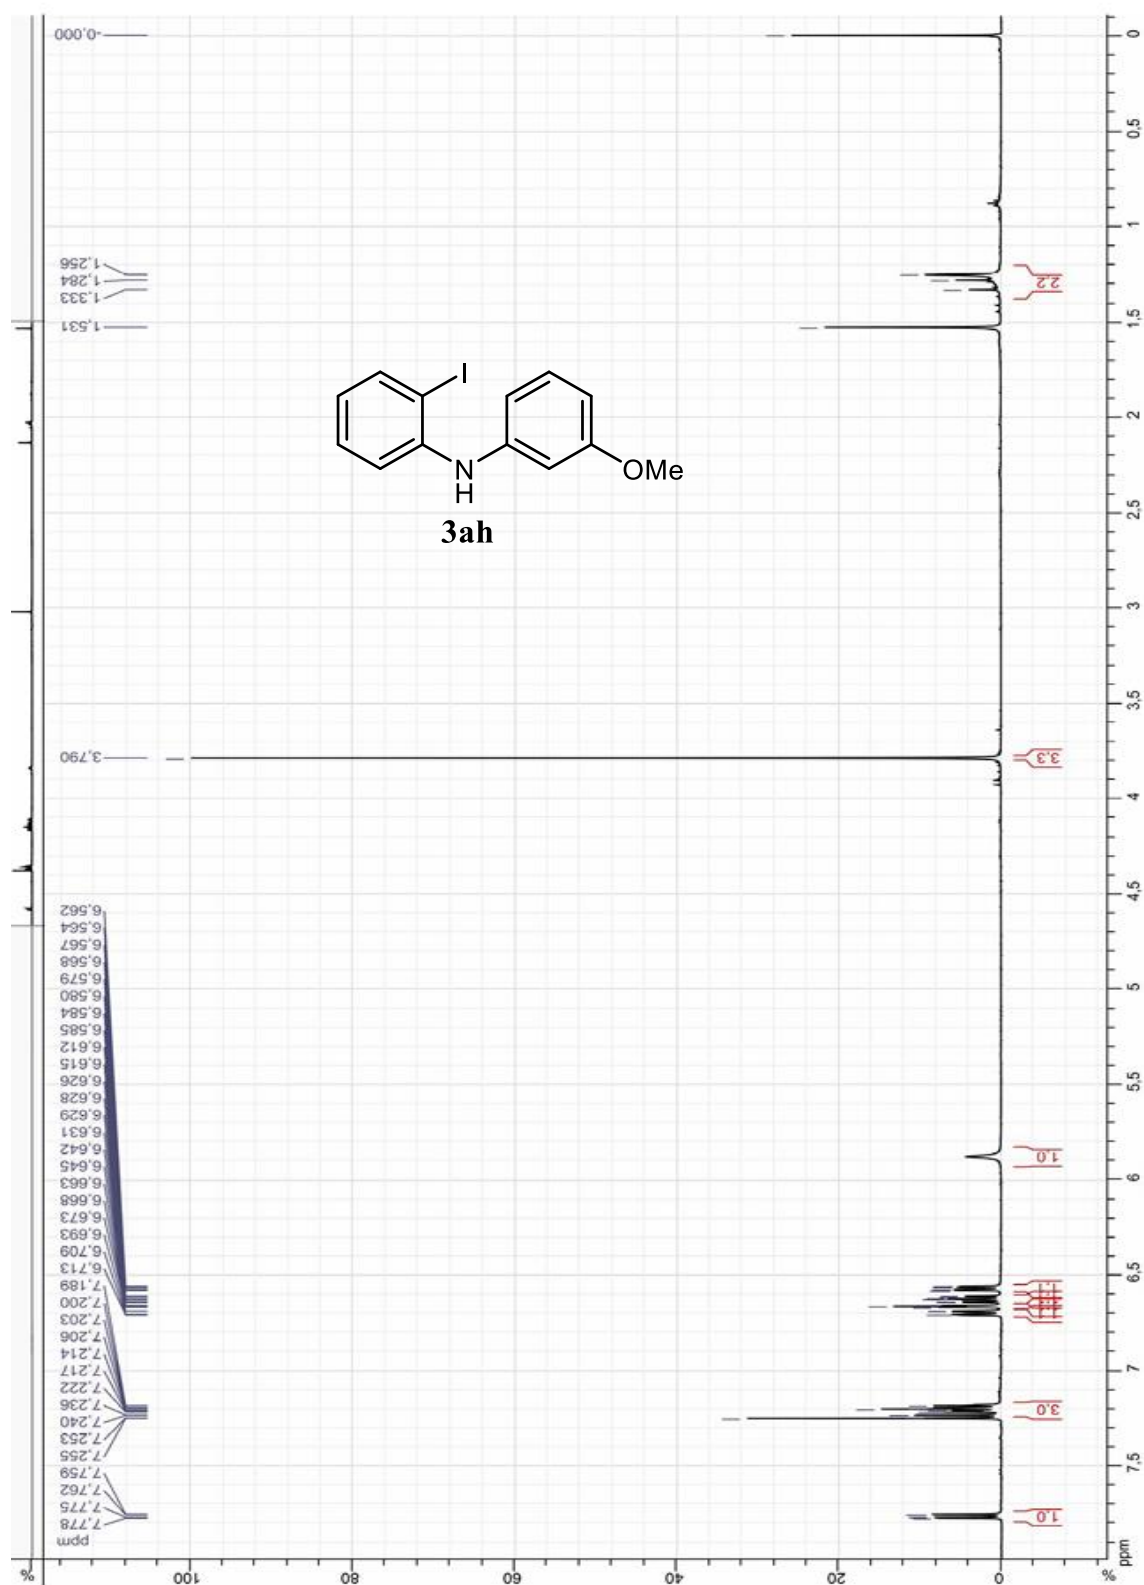

$^1\text{H}$  NMR spectra of 2-iodo-*N*-(3-acetylphenyl)aniline (**3ai**) in  $\text{CDCl}_3$

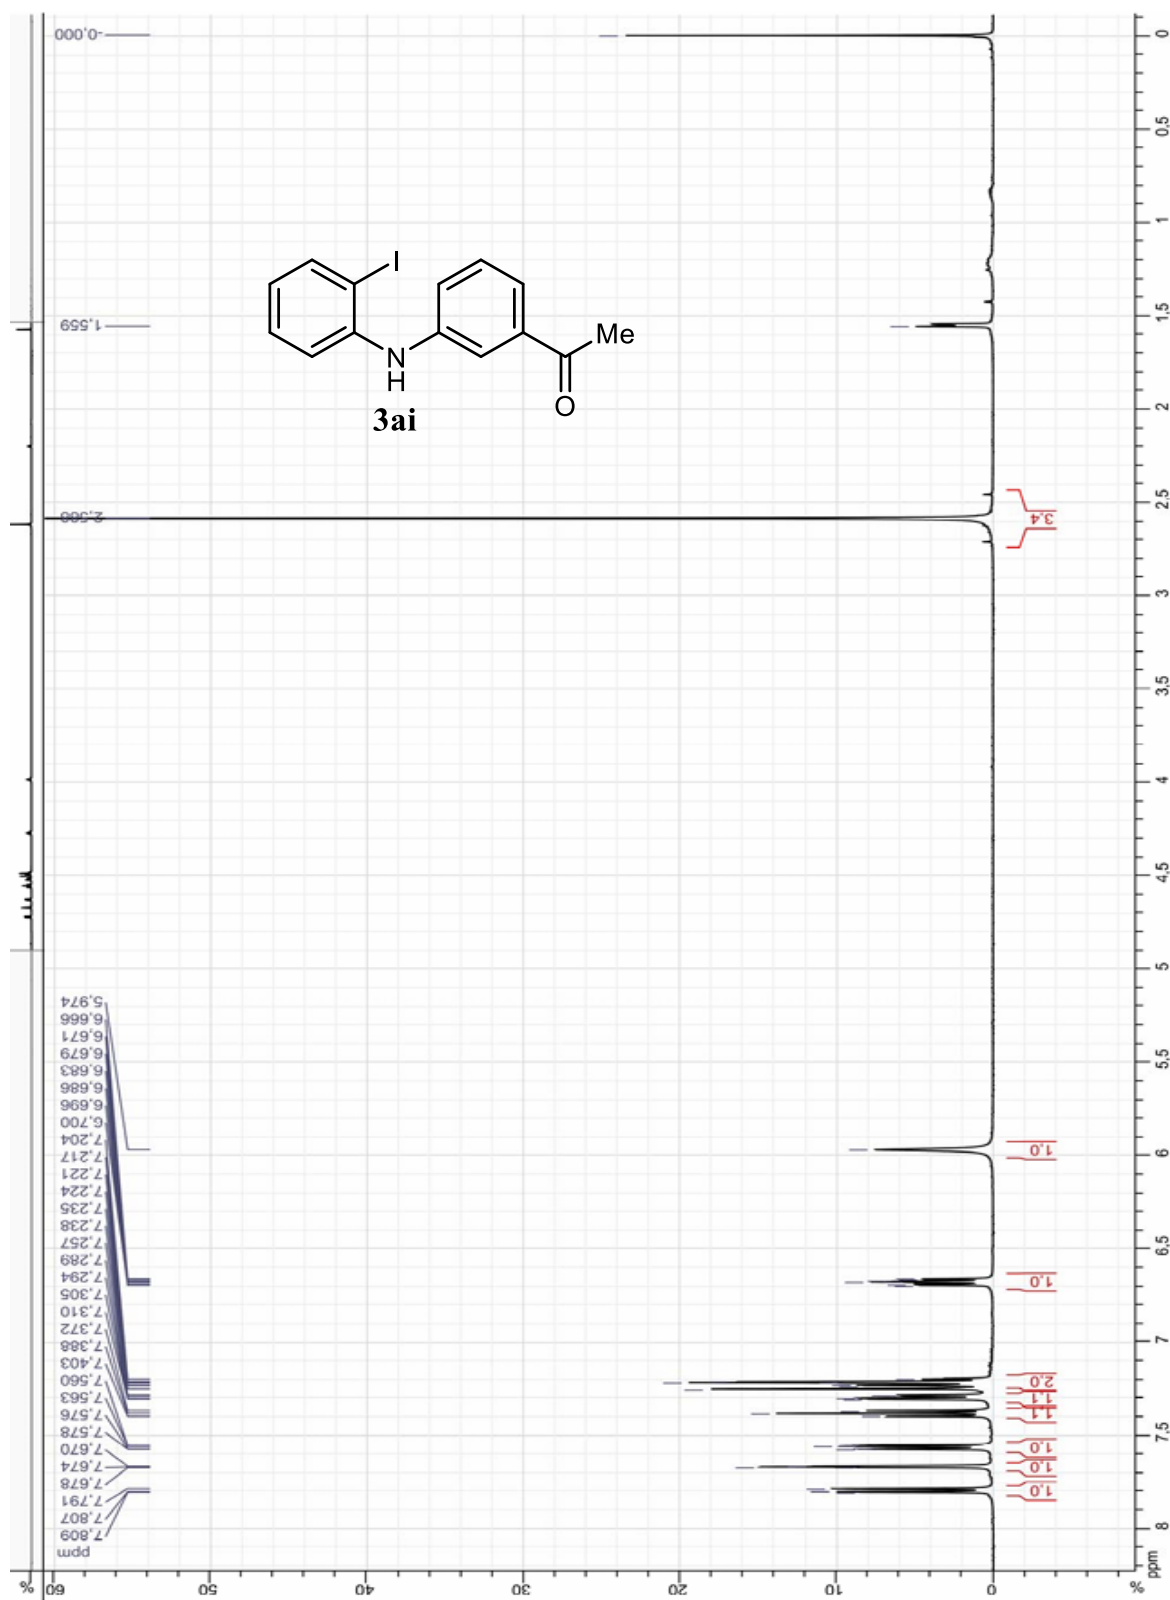

$^1\text{H}$  NMR spectra of 2-iodo-*N*-(3-cyanophenyl)aniline (**3aj**) in  $\text{CDCl}_3$

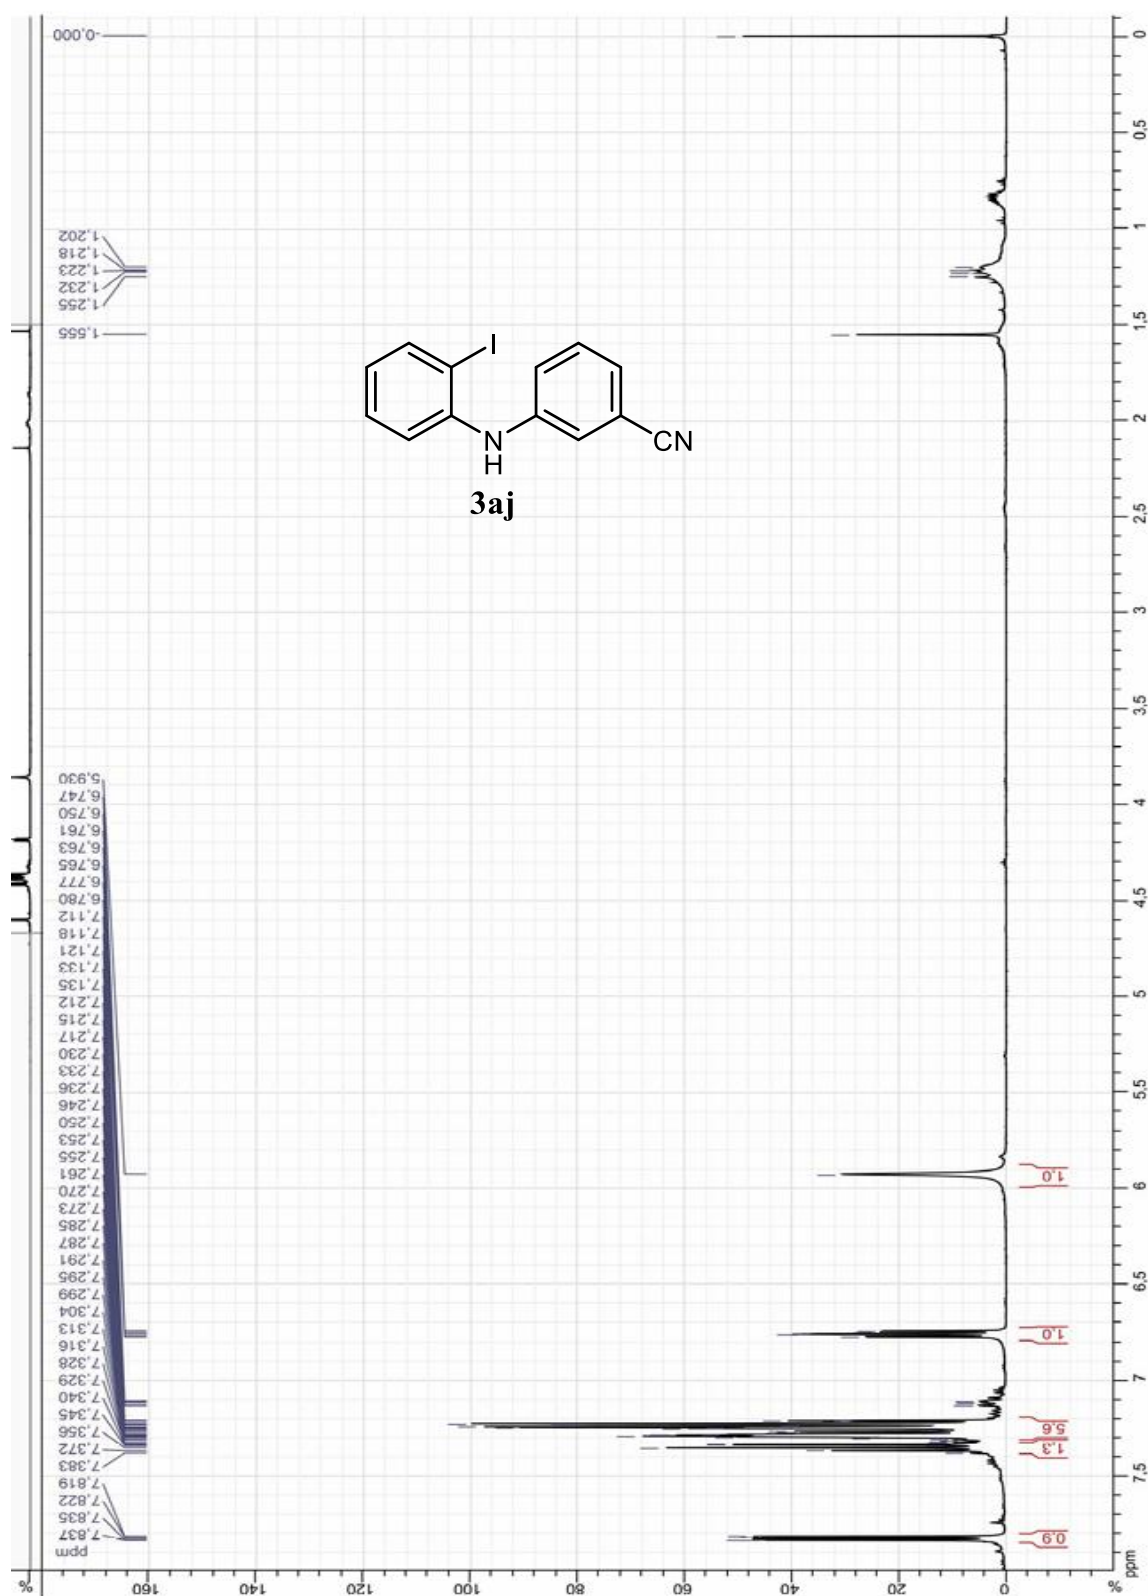



$^1\text{H}$  NMR spectrum of *N*-(2-iodophenyl)pyridin-3-amine (**3ak**) in  $\text{CDCl}_3$

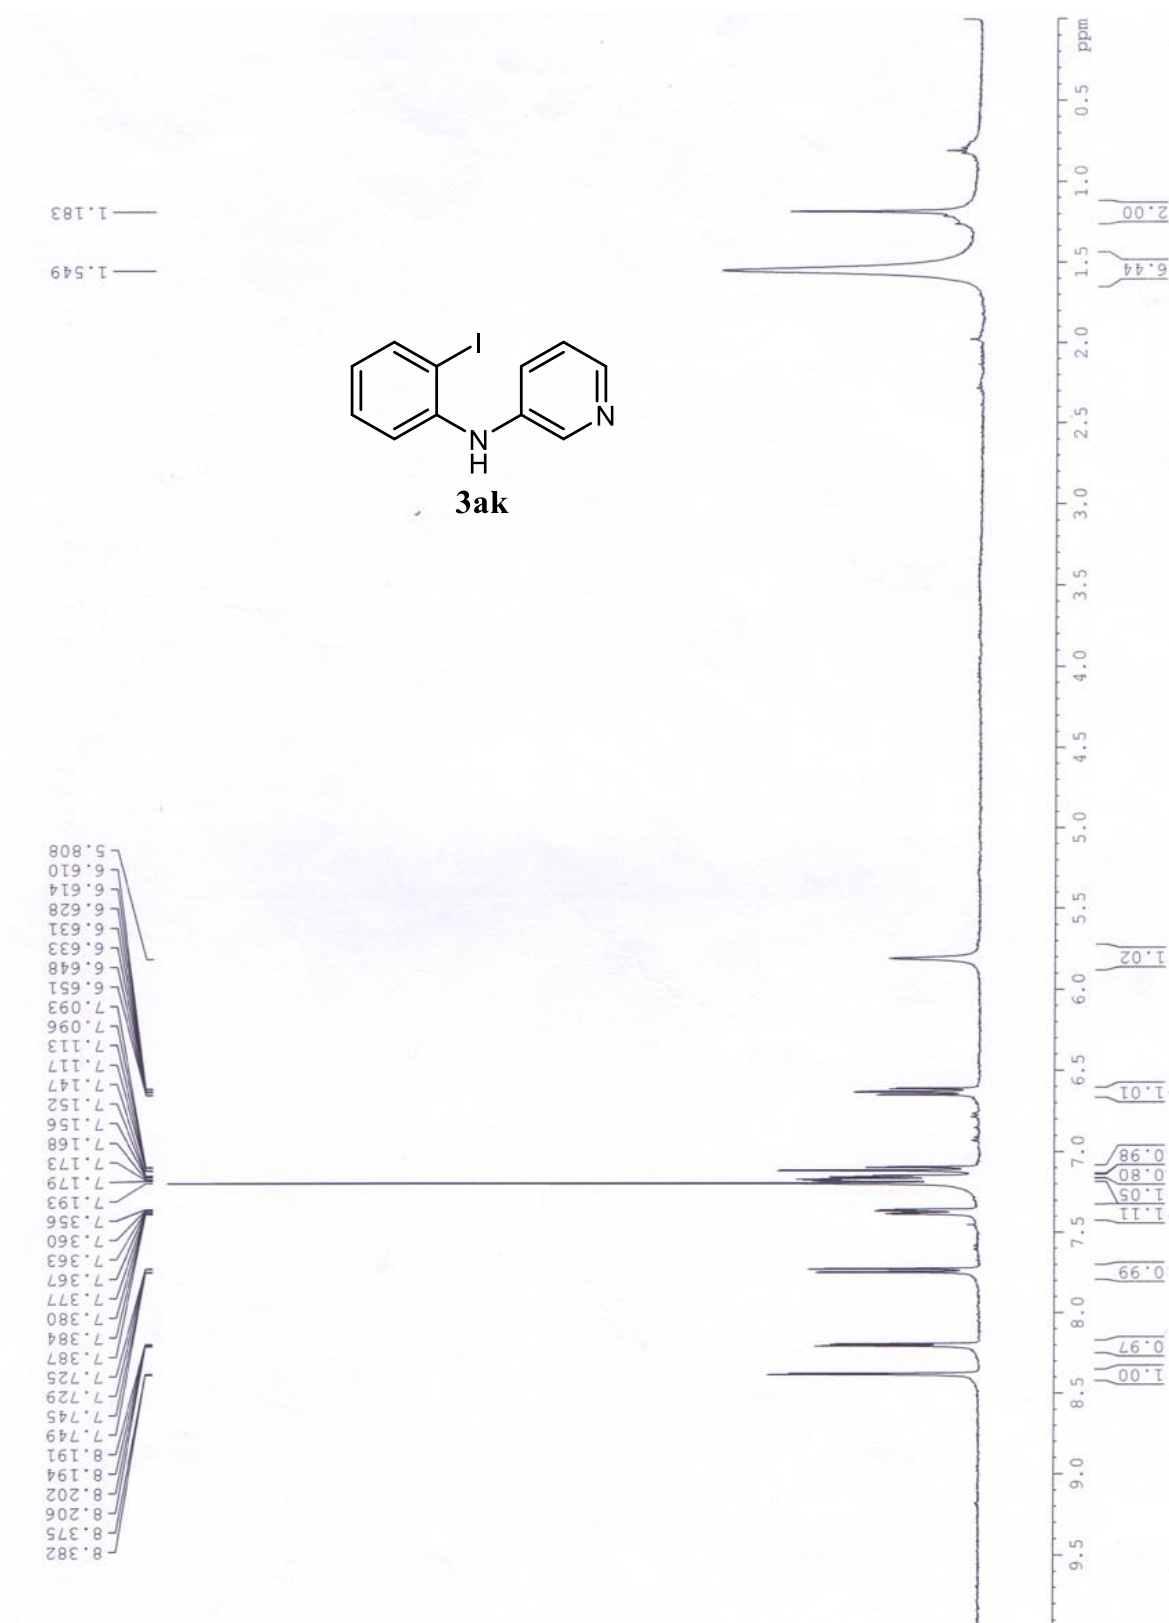

$^1\text{H}$  NMR and  $^{13}\text{C}$  spectra of 2-iodo-*N*-(*m*-tolyl)aniline (**3al**) in  $\text{CDCl}_3$

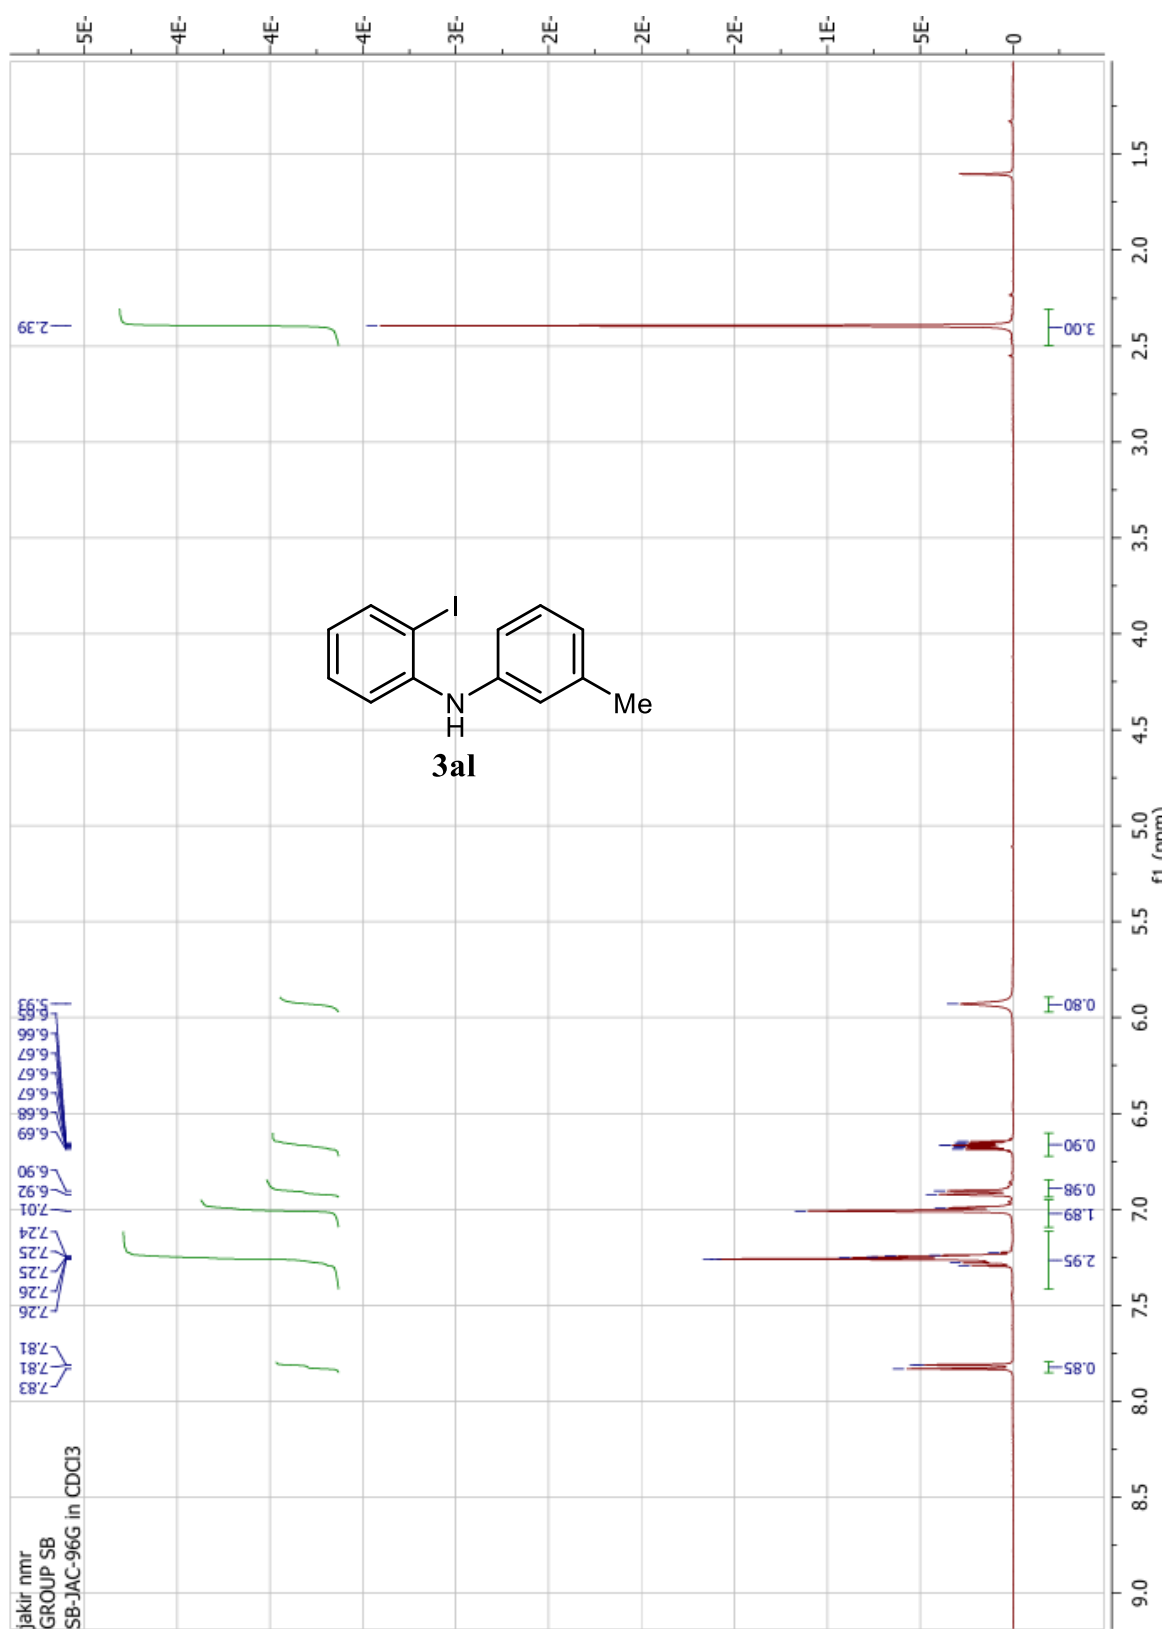

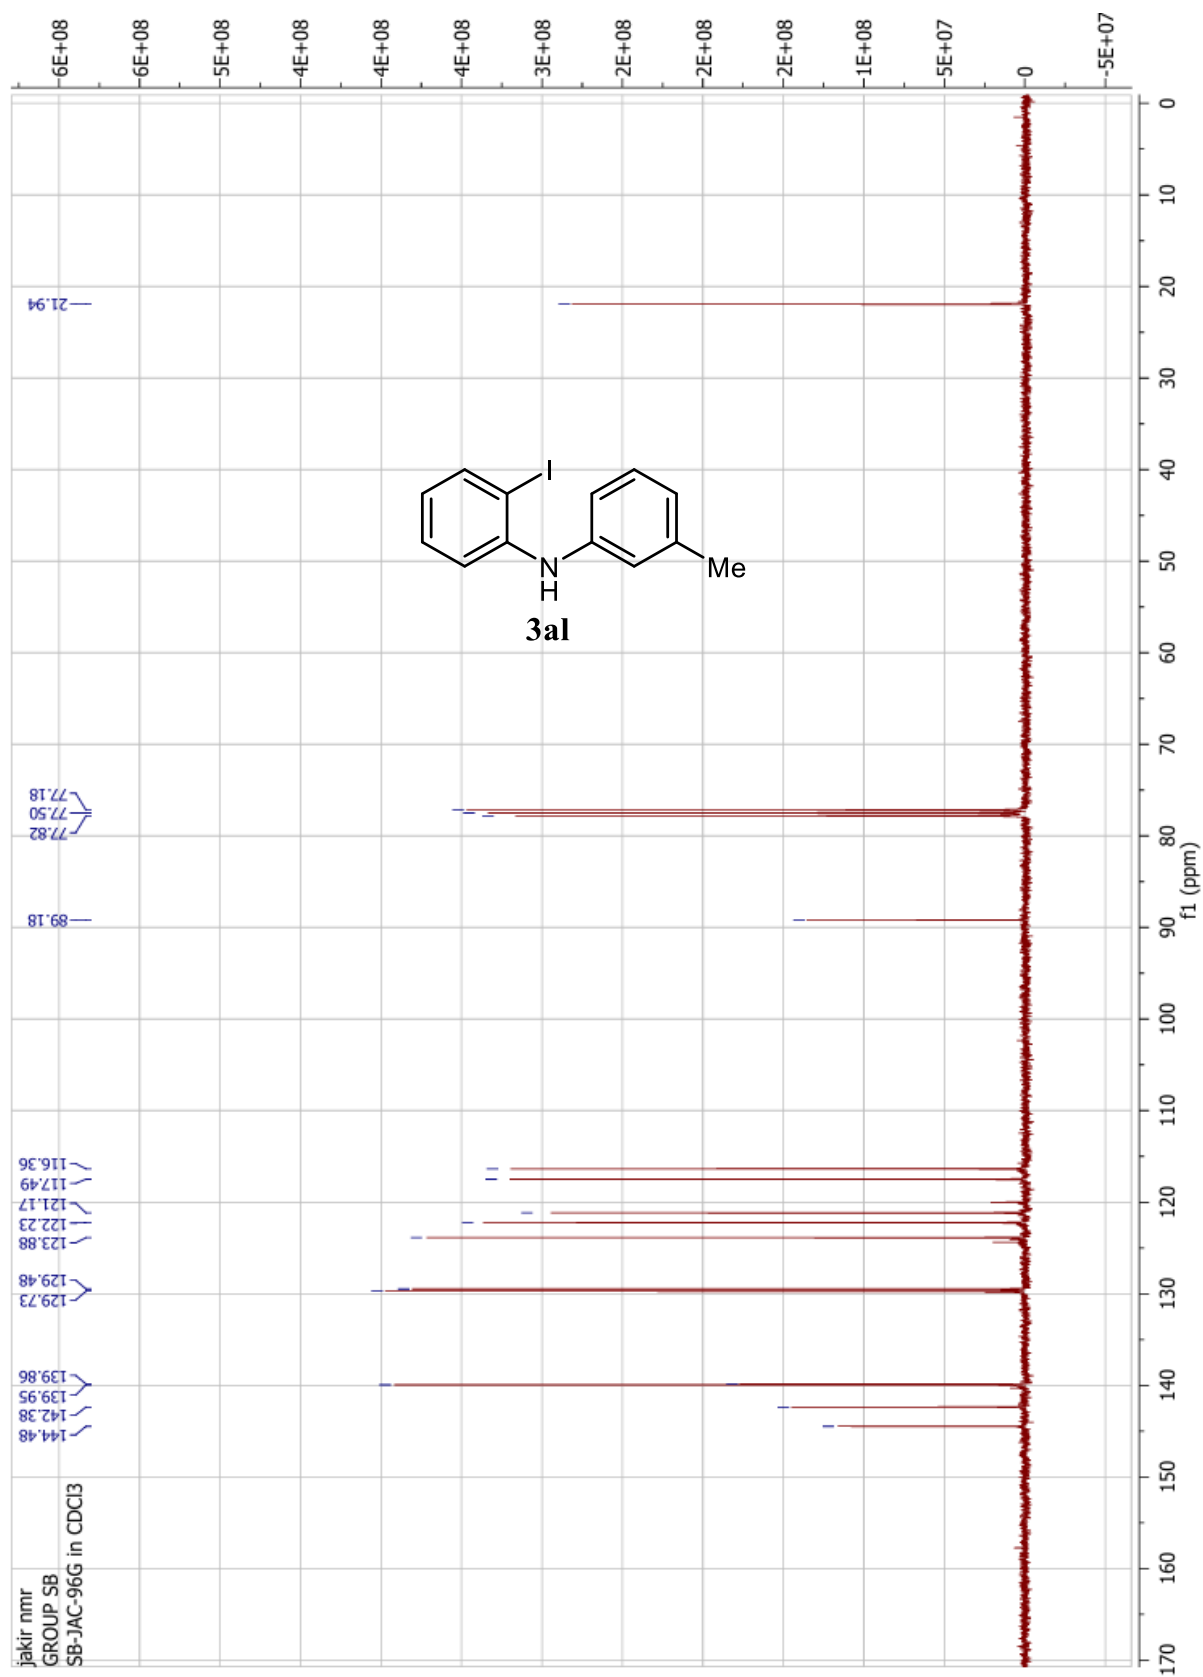

$^1\text{H}$  NMR spectrum of 2-iodo-*N*-(2-nitrophenyl)aniline (**3am**) in  $\text{CDCl}_3$

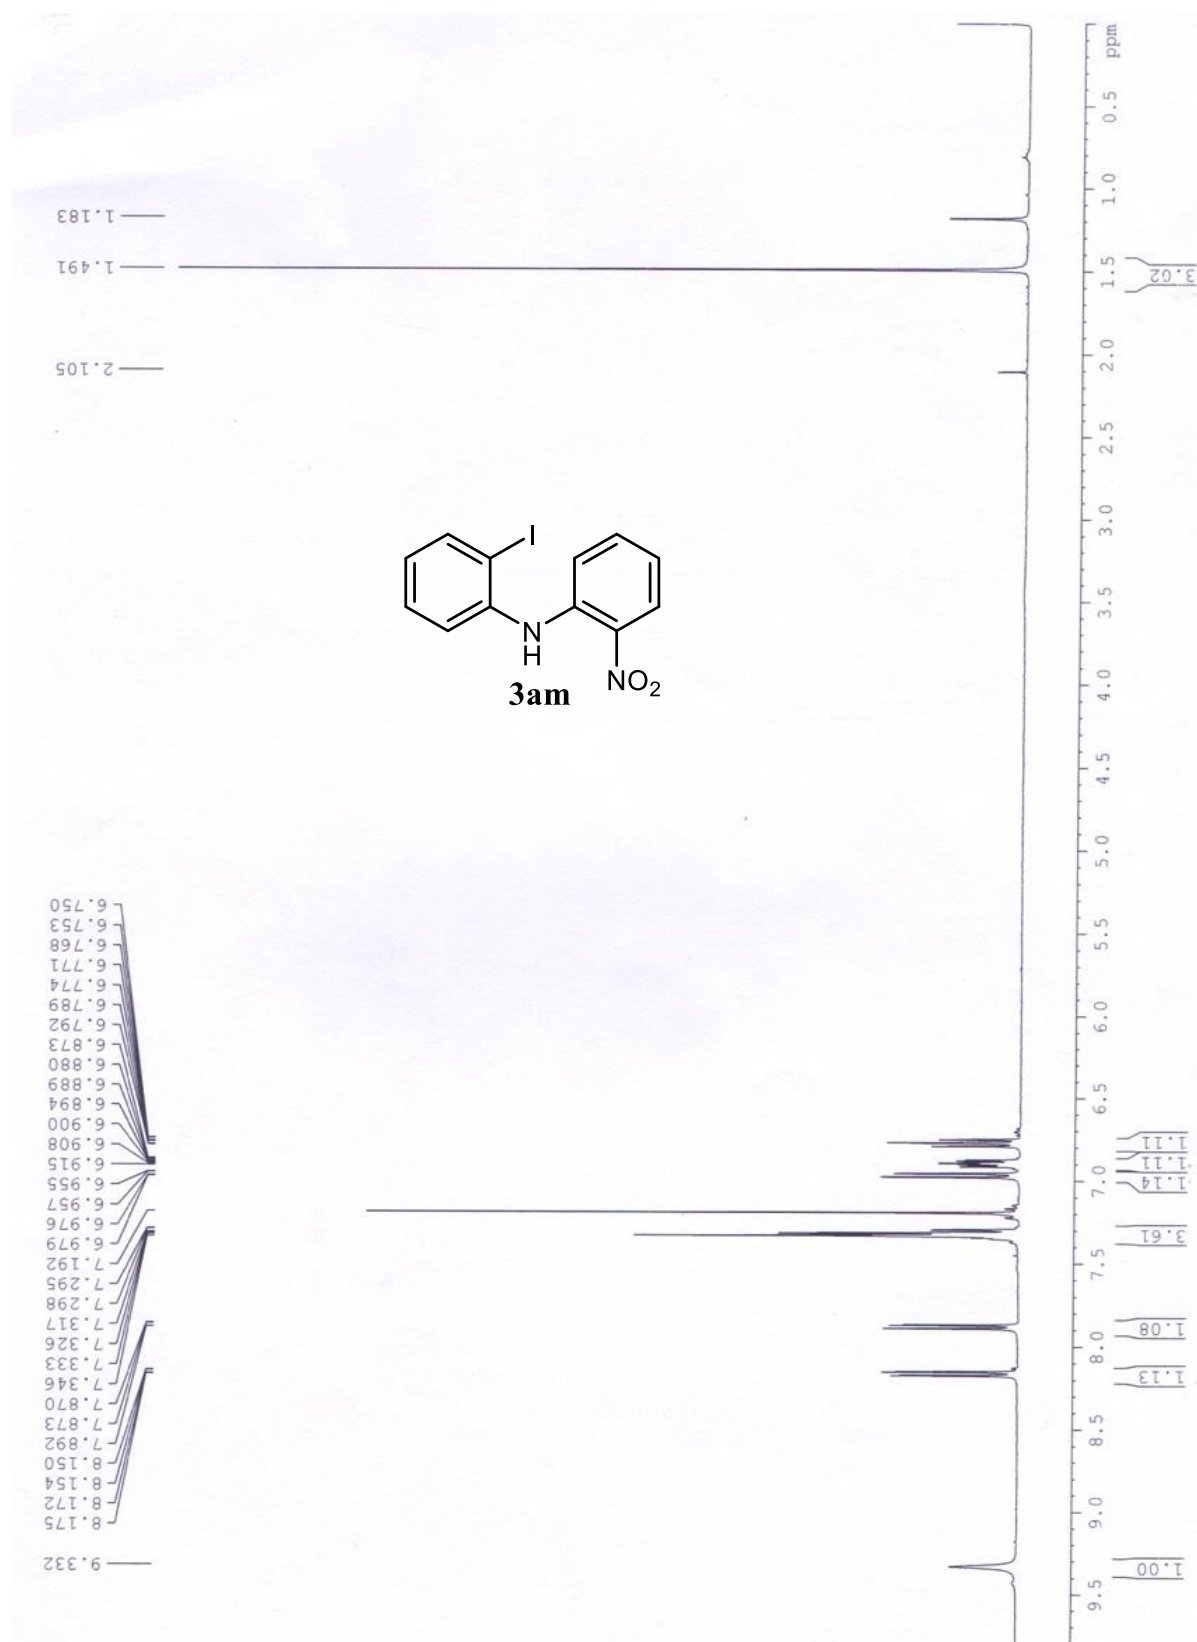

$^1\text{H}$  NMR and  $^{13}\text{C}$  spectra of 2-iodo-*N*-(*o*-tolyl)aniline (**3an**) in  $\text{CDCl}_3$

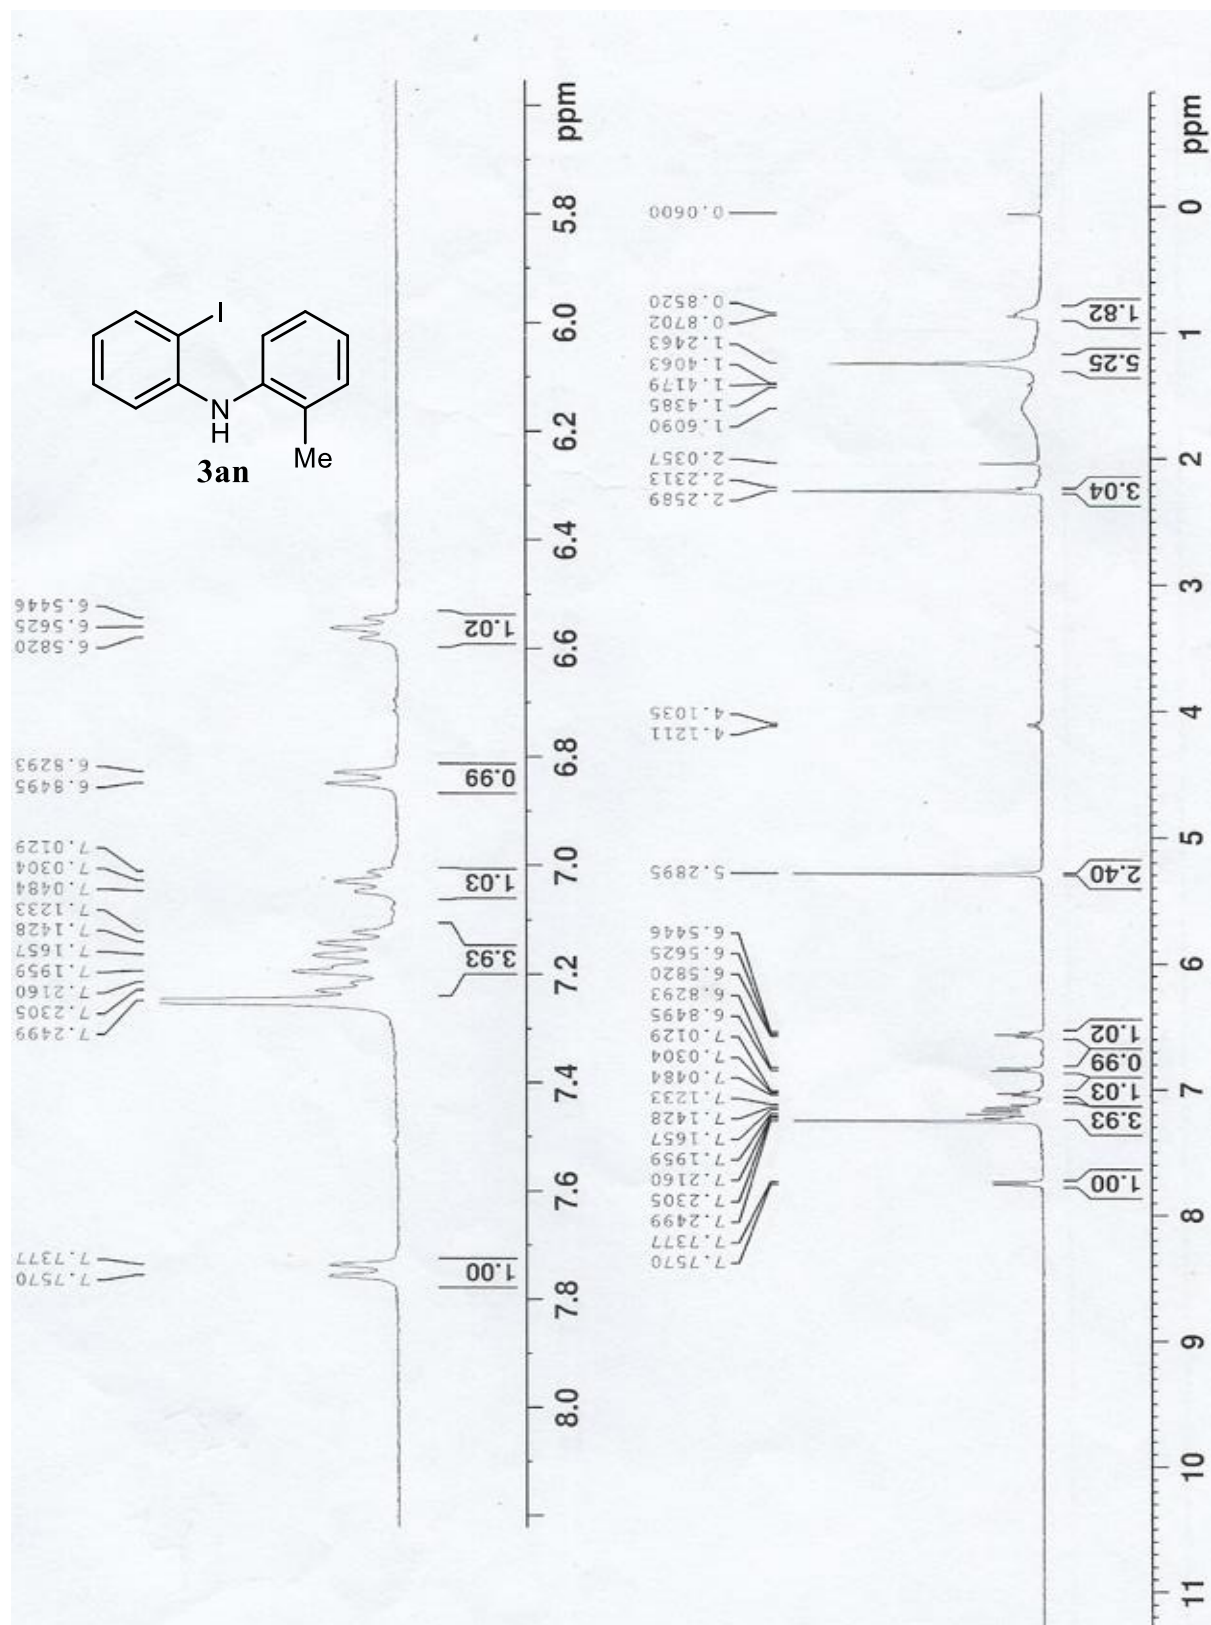

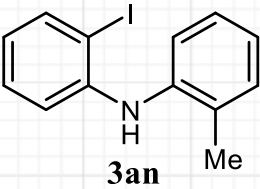

$^1\text{H}$  NMR and  $^{13}\text{C}$  spectra of *N*-(2-iodophenyl)-2,5-dimethylaniline (**3ao**) in  $\text{CDCl}_3$

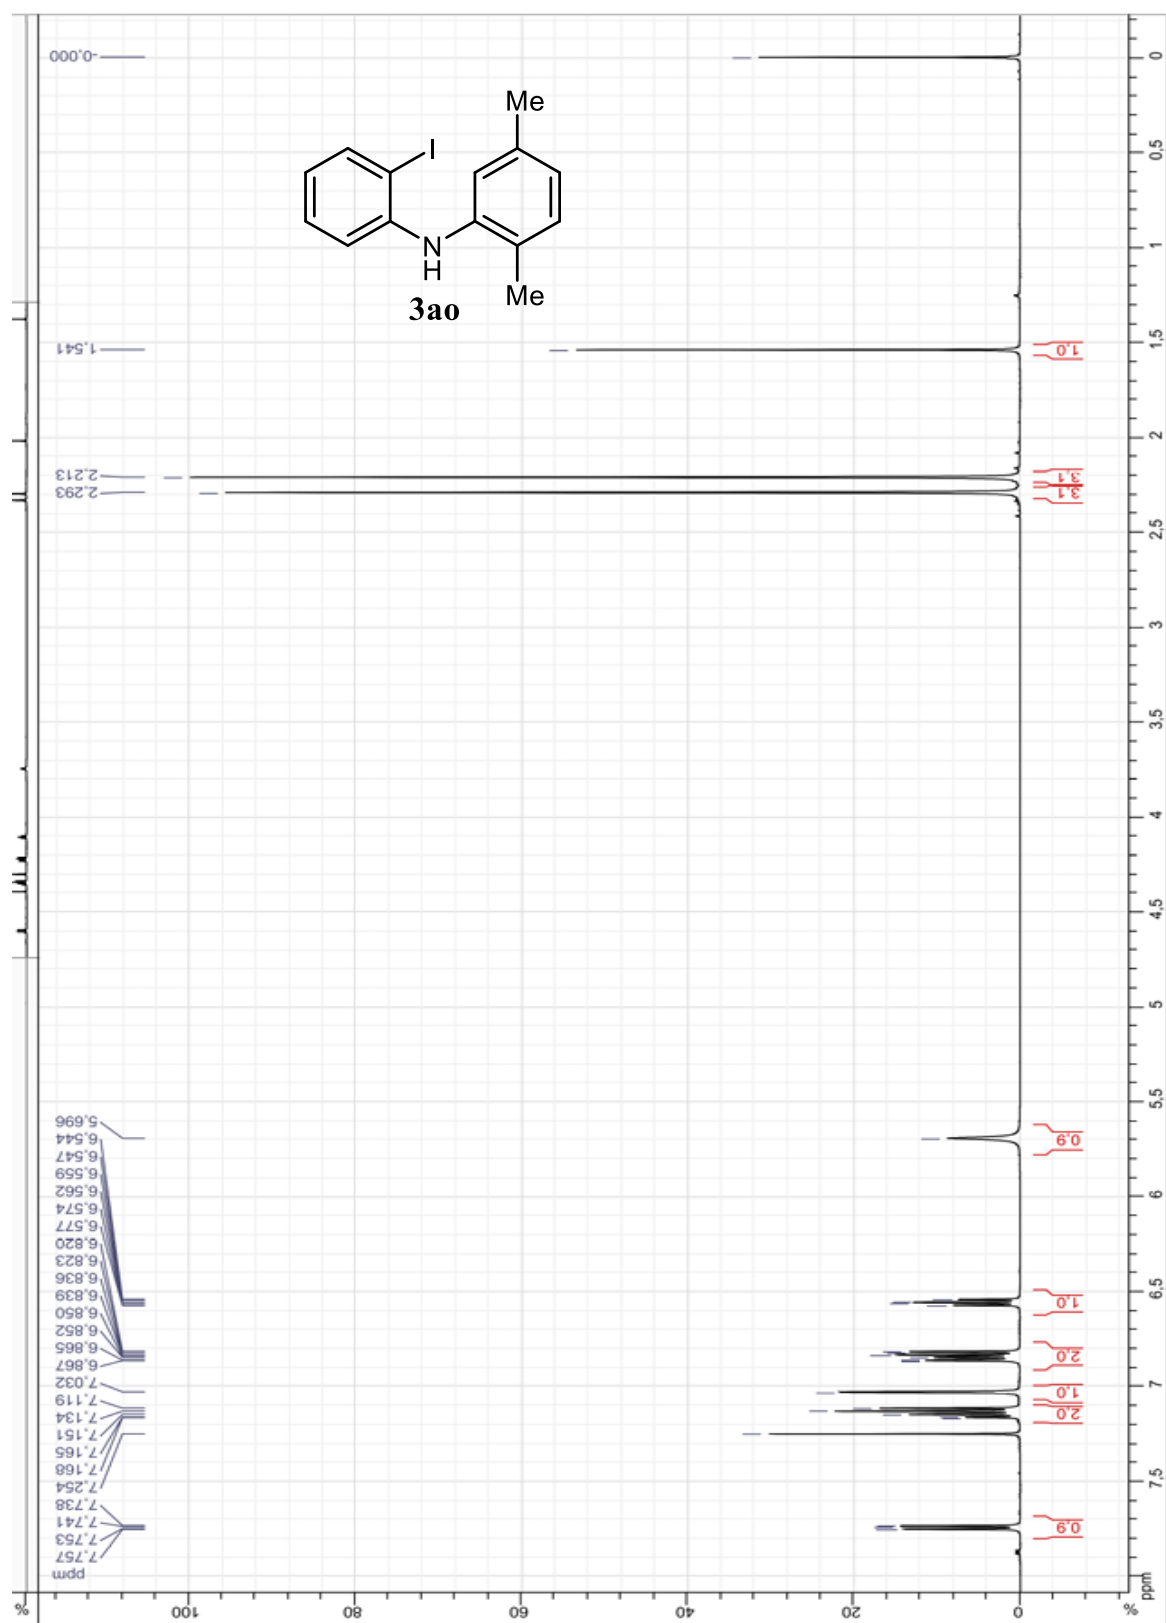

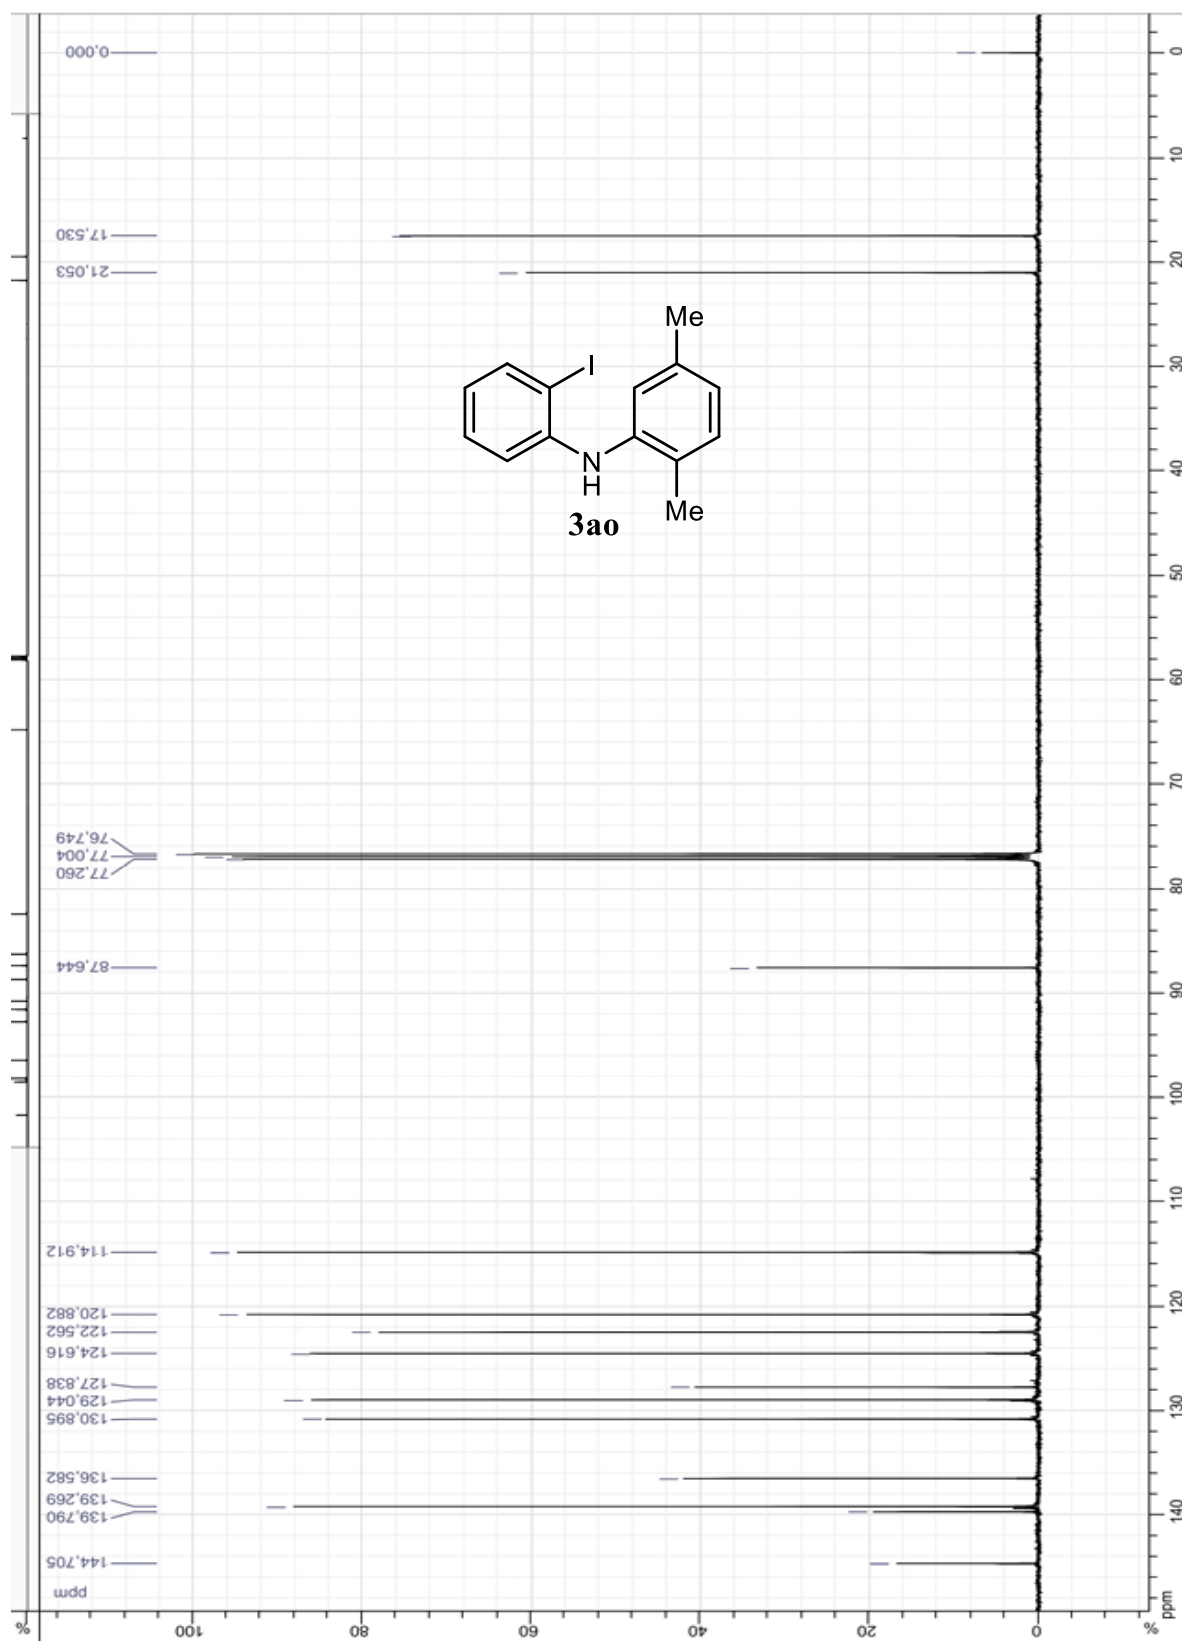



$^1\text{H}$  NMR and  $^{13}\text{C}$  spectra of 4-fluoro-*N*-(4-fluorophenyl)-2-iodoaniline (**3ec**) in  $\text{CDCl}_3$

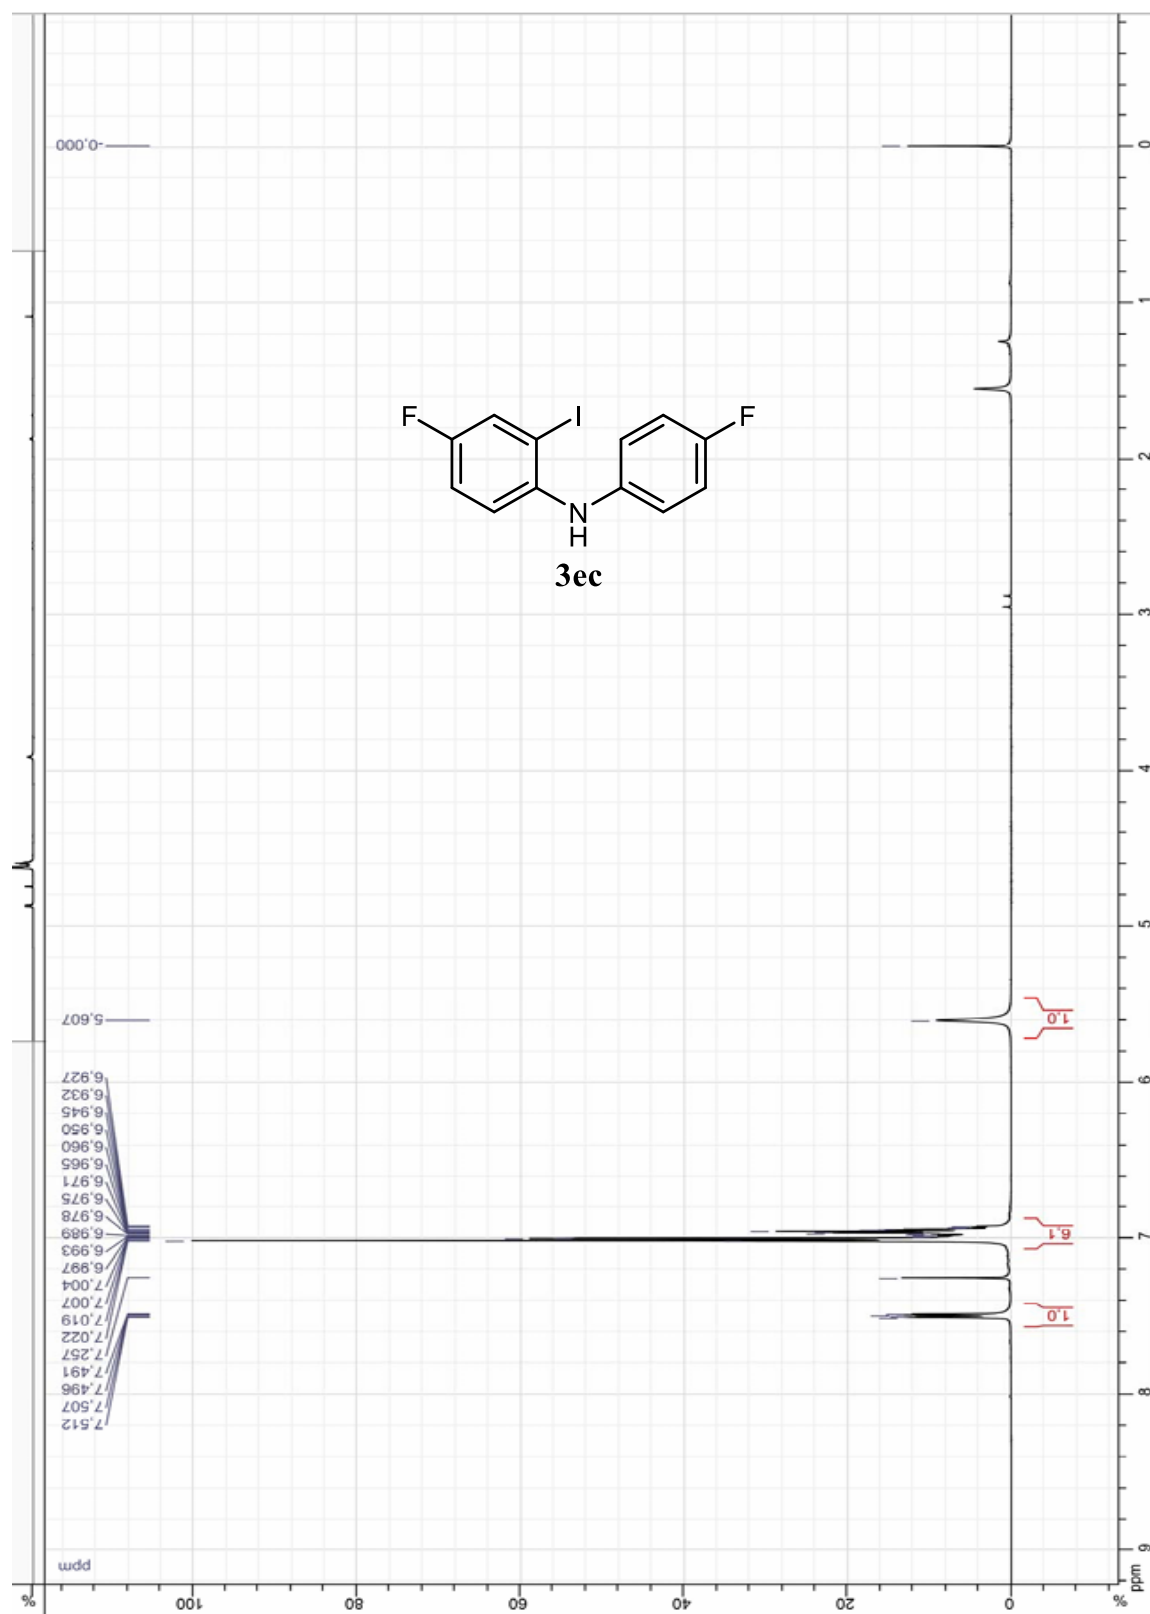

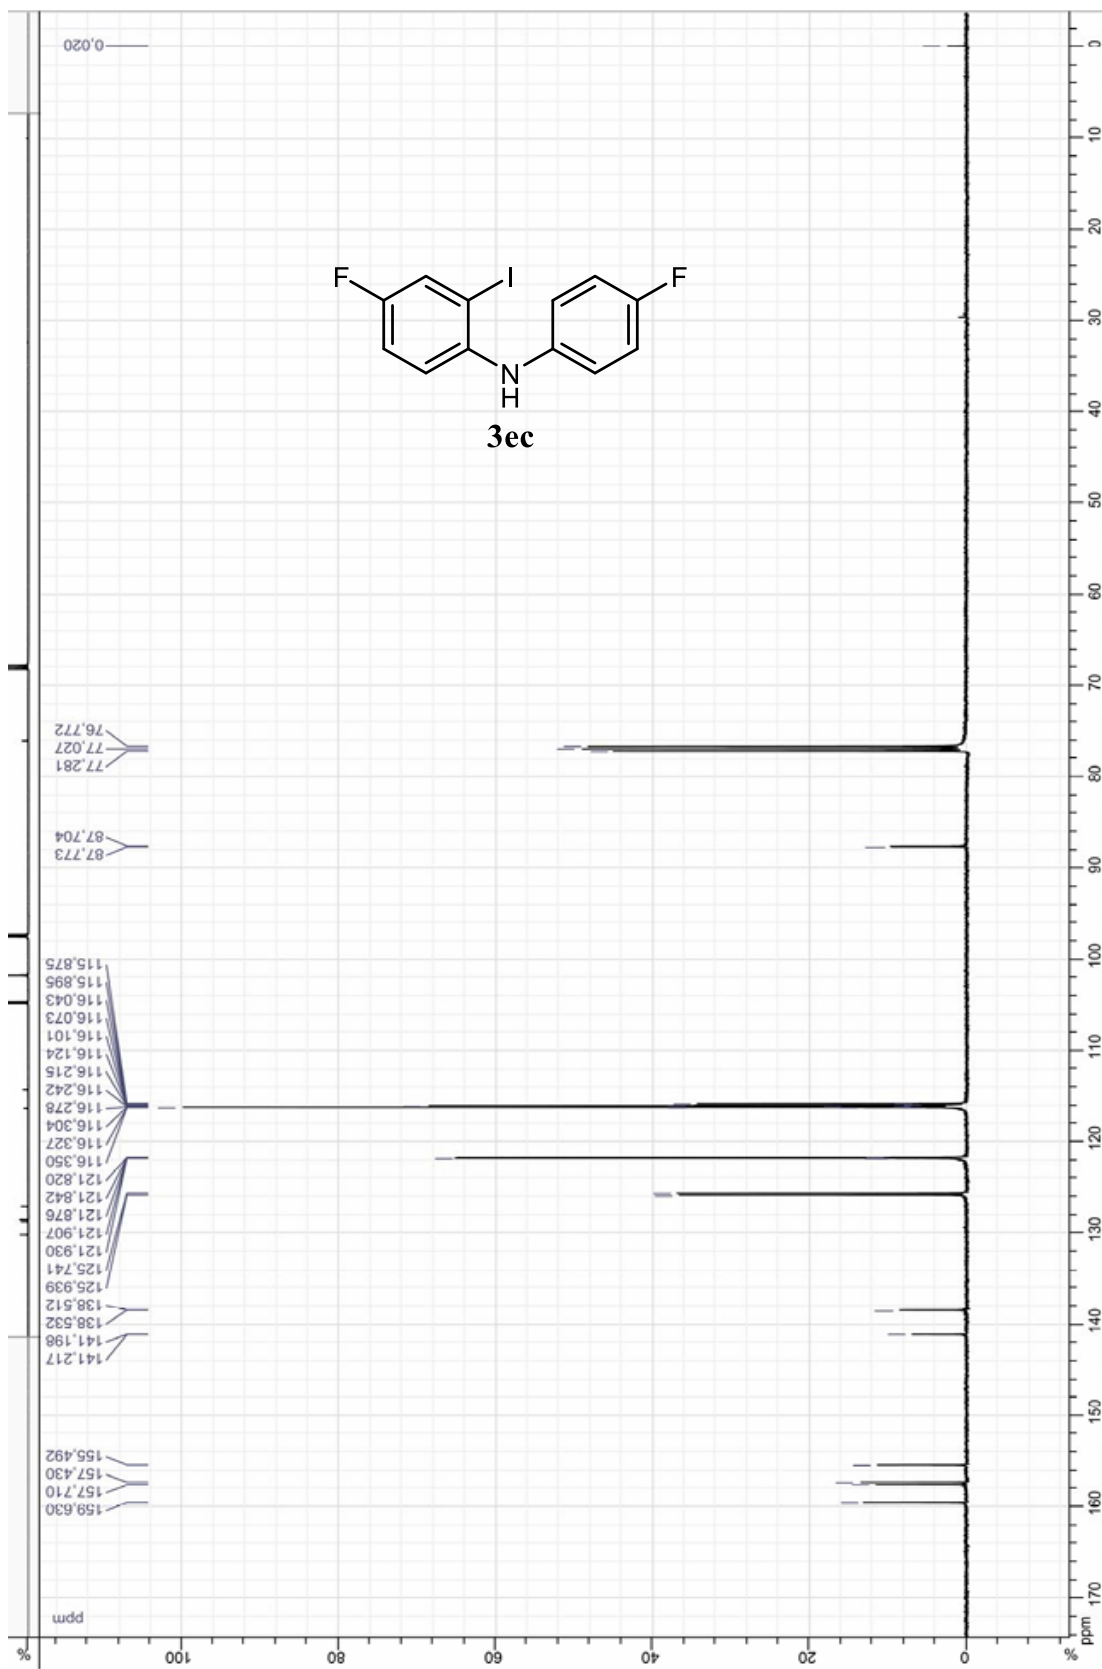

$^1\text{H}$  NMR and  $^{13}\text{C}$  spectra of 4-chloro-*N*-(4-fluorophenyl)-2-iodoaniline (**3fc**) in  $\text{CDCl}_3$

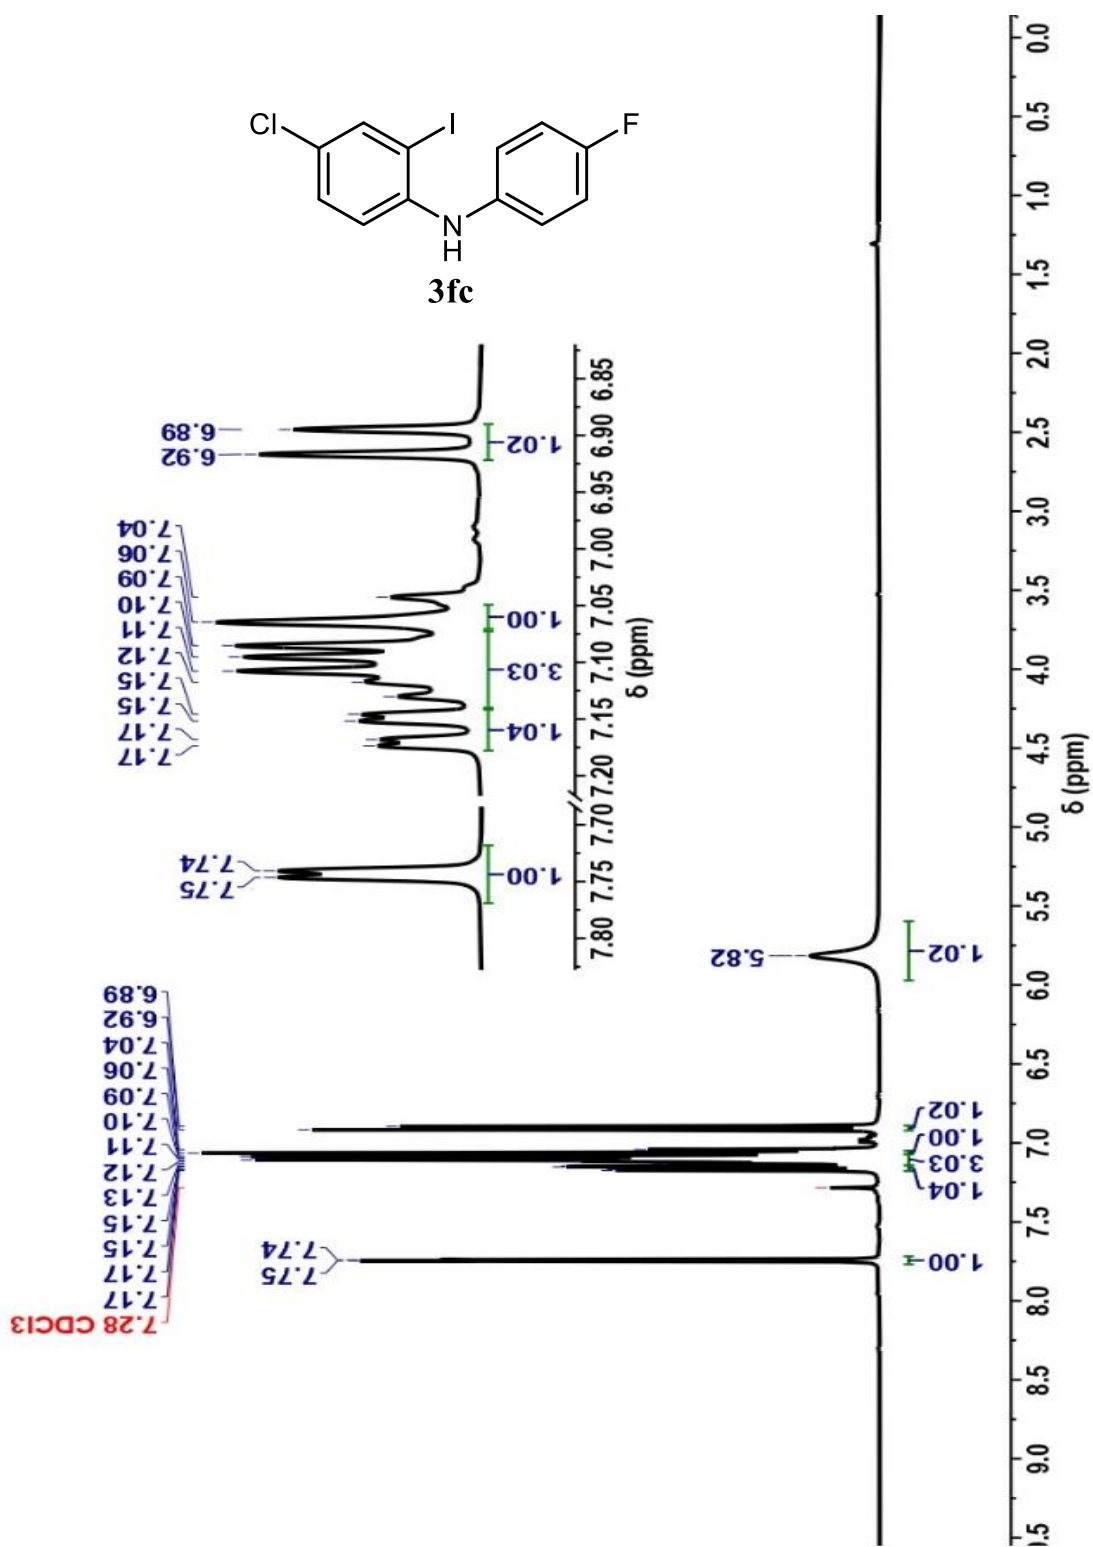

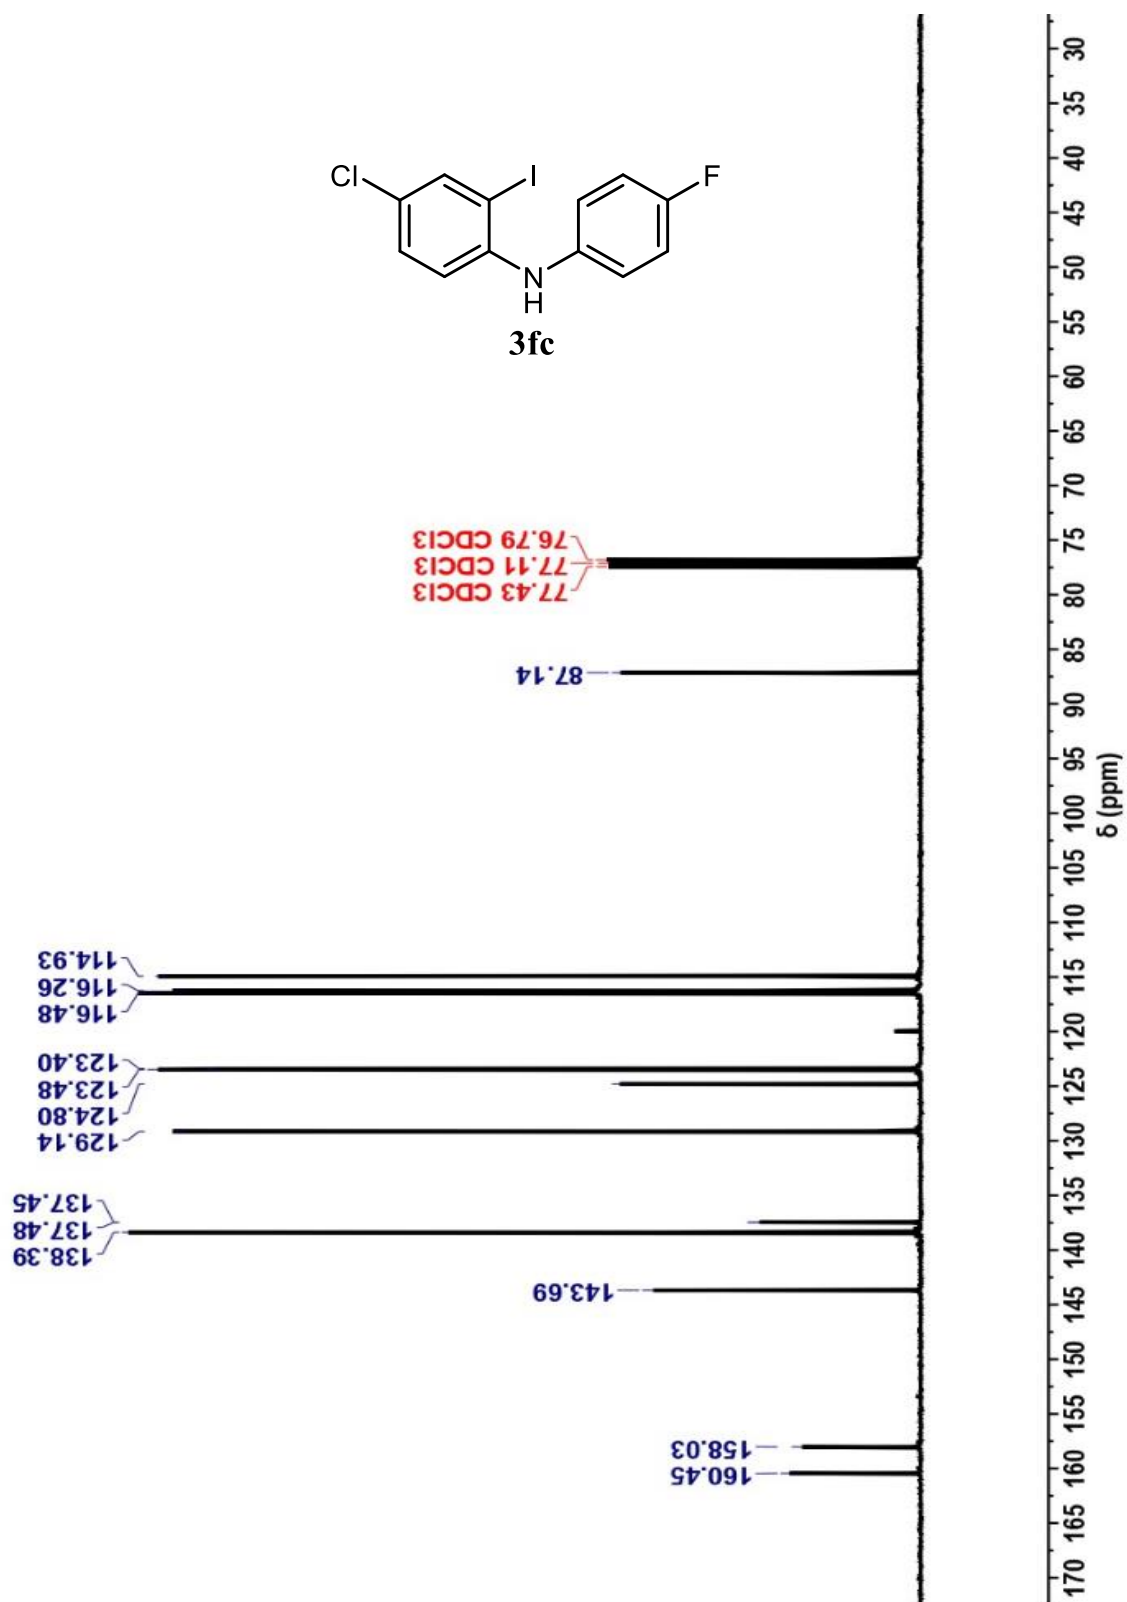

$^1\text{H}$  NMR and  $^{13}\text{C}$  spectra of 4-chloro-*N*-(4-chlorophenyl)-2-iodoaniline (**3fd**) in  $\text{CDCl}_3$

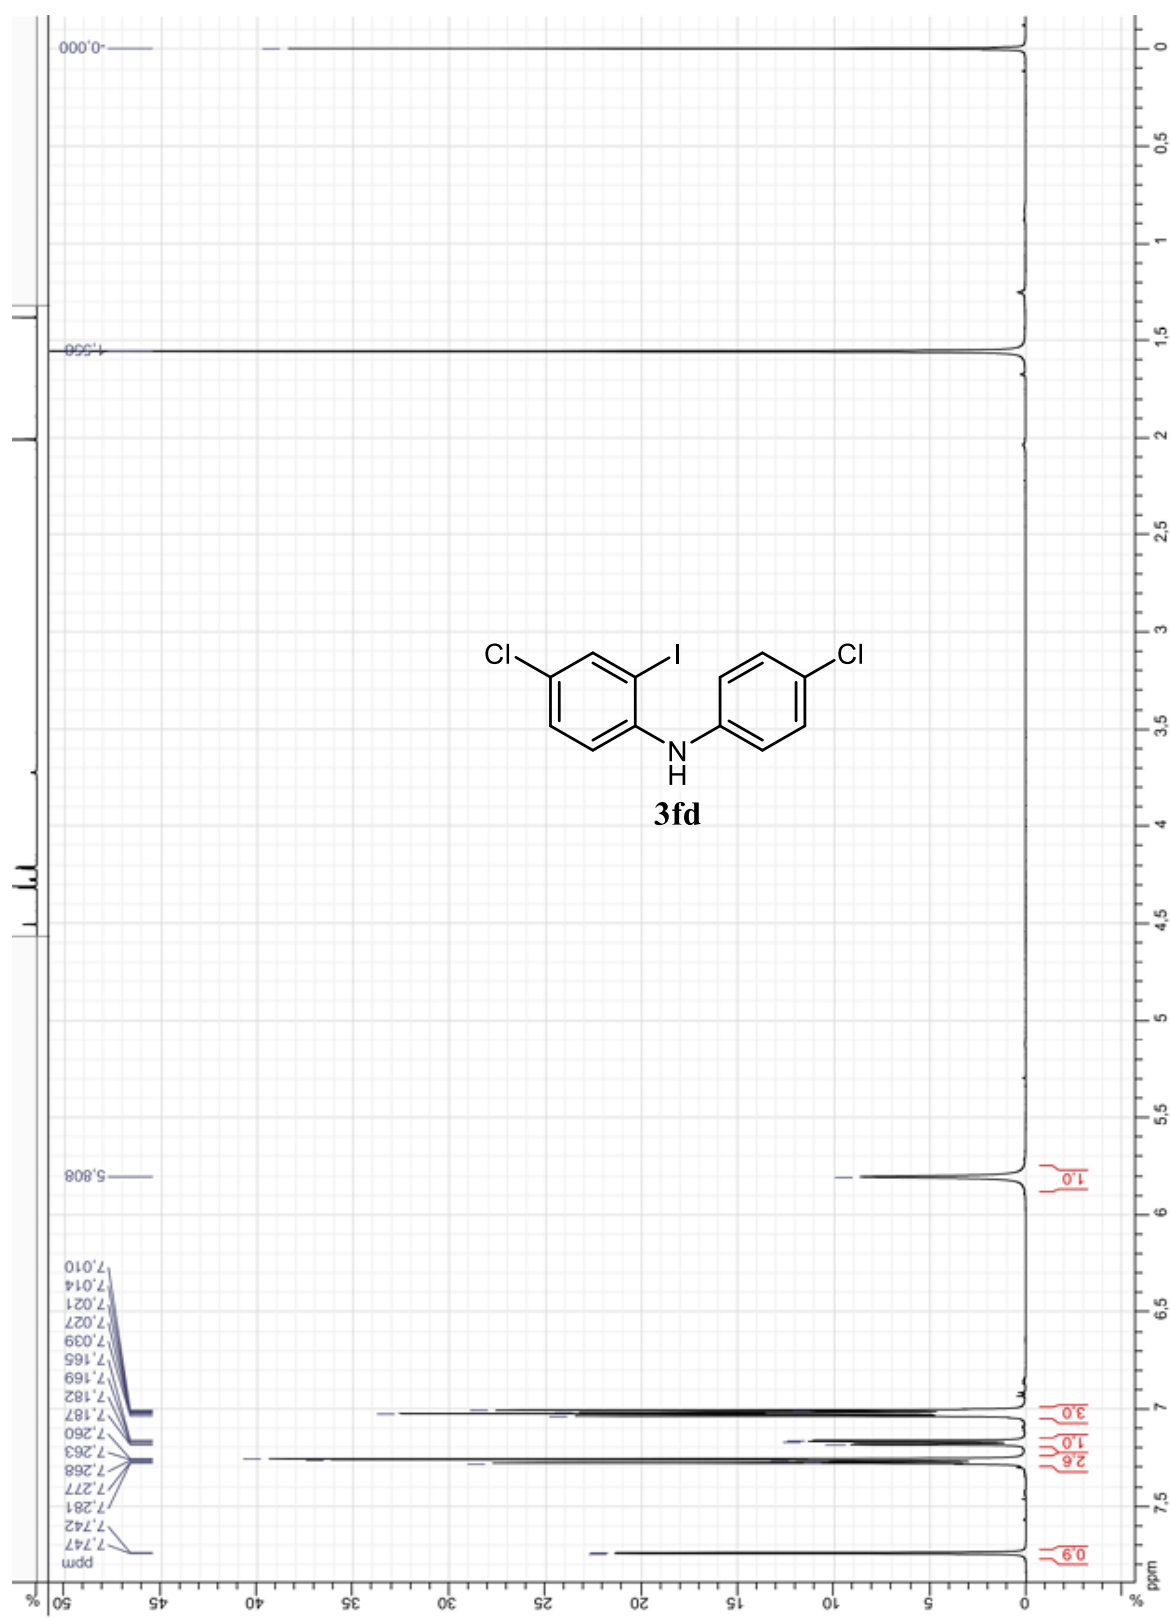

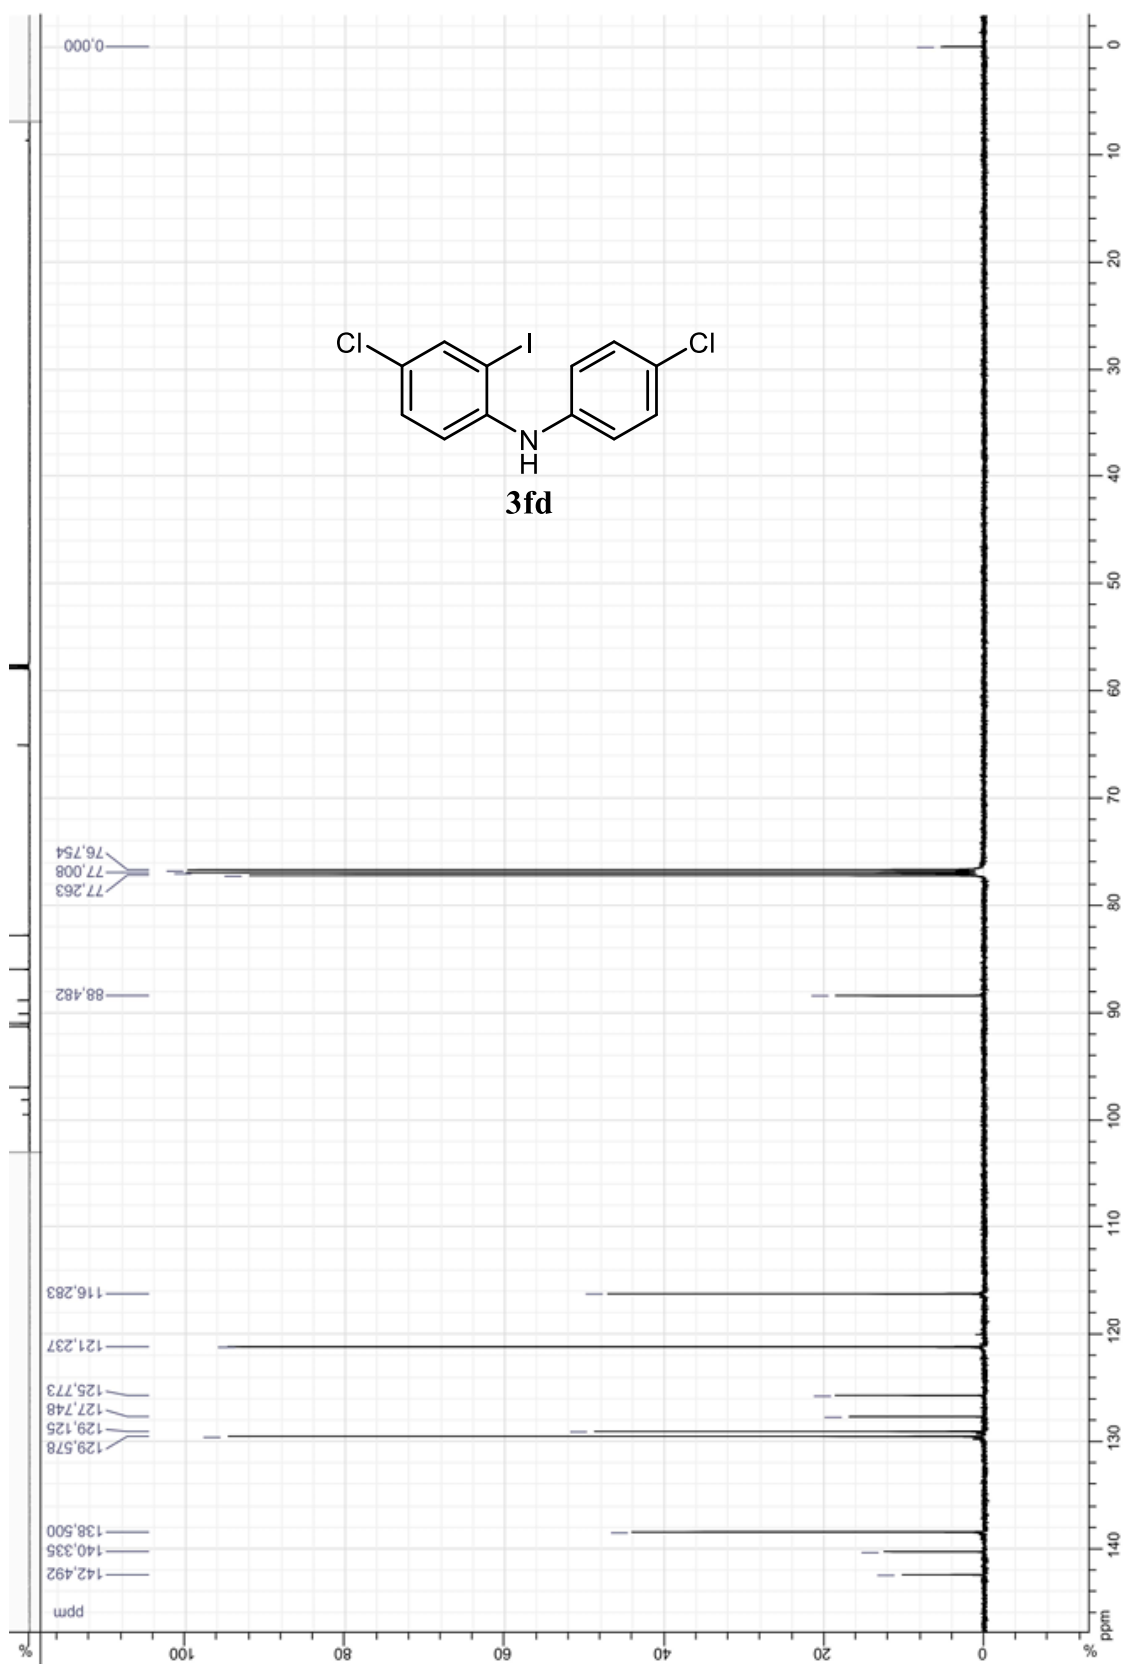

$^1\text{H}$  NMR spectrum of 4-chloro-2-iodo-*N*-(4-bromophenyl)aniline (**3fe**) in  $\text{CDCl}_3$

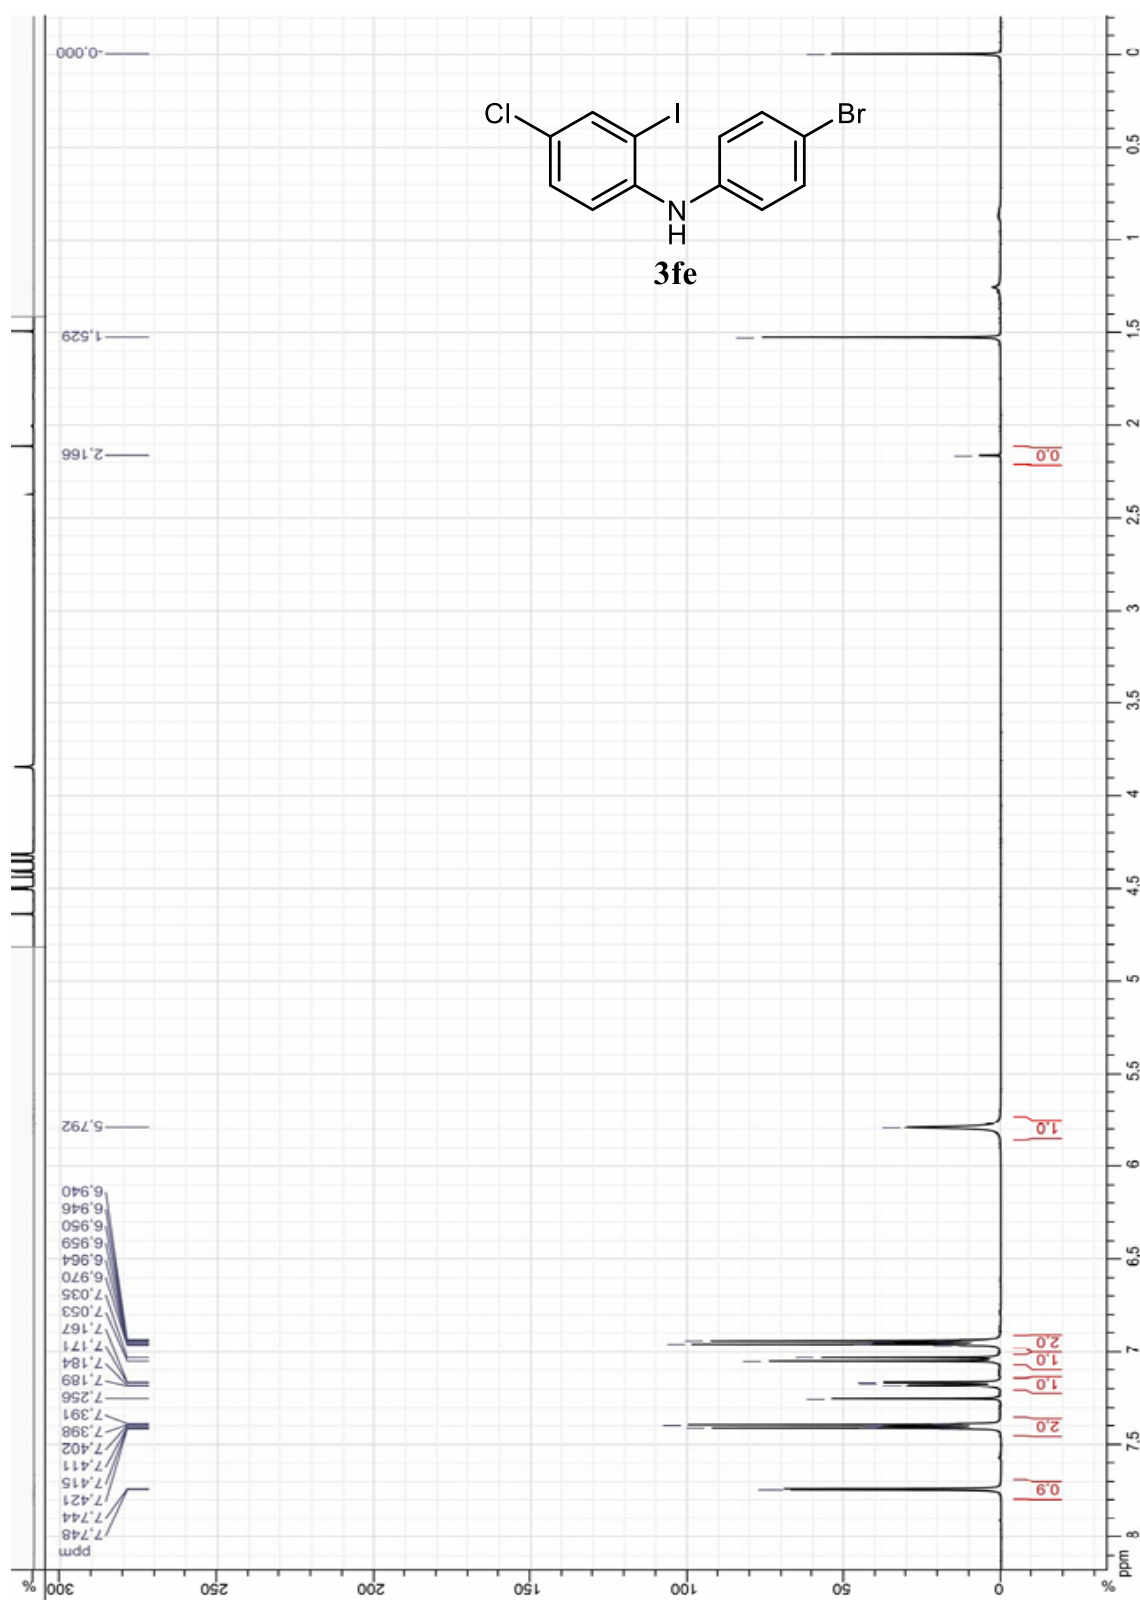

$^1\text{H}$  NMR spectrum of 4-fluoro-2-iodo-*N*-(4-methoxyphenyl)aniline (**3eg**) in  $\text{CDCl}_3$

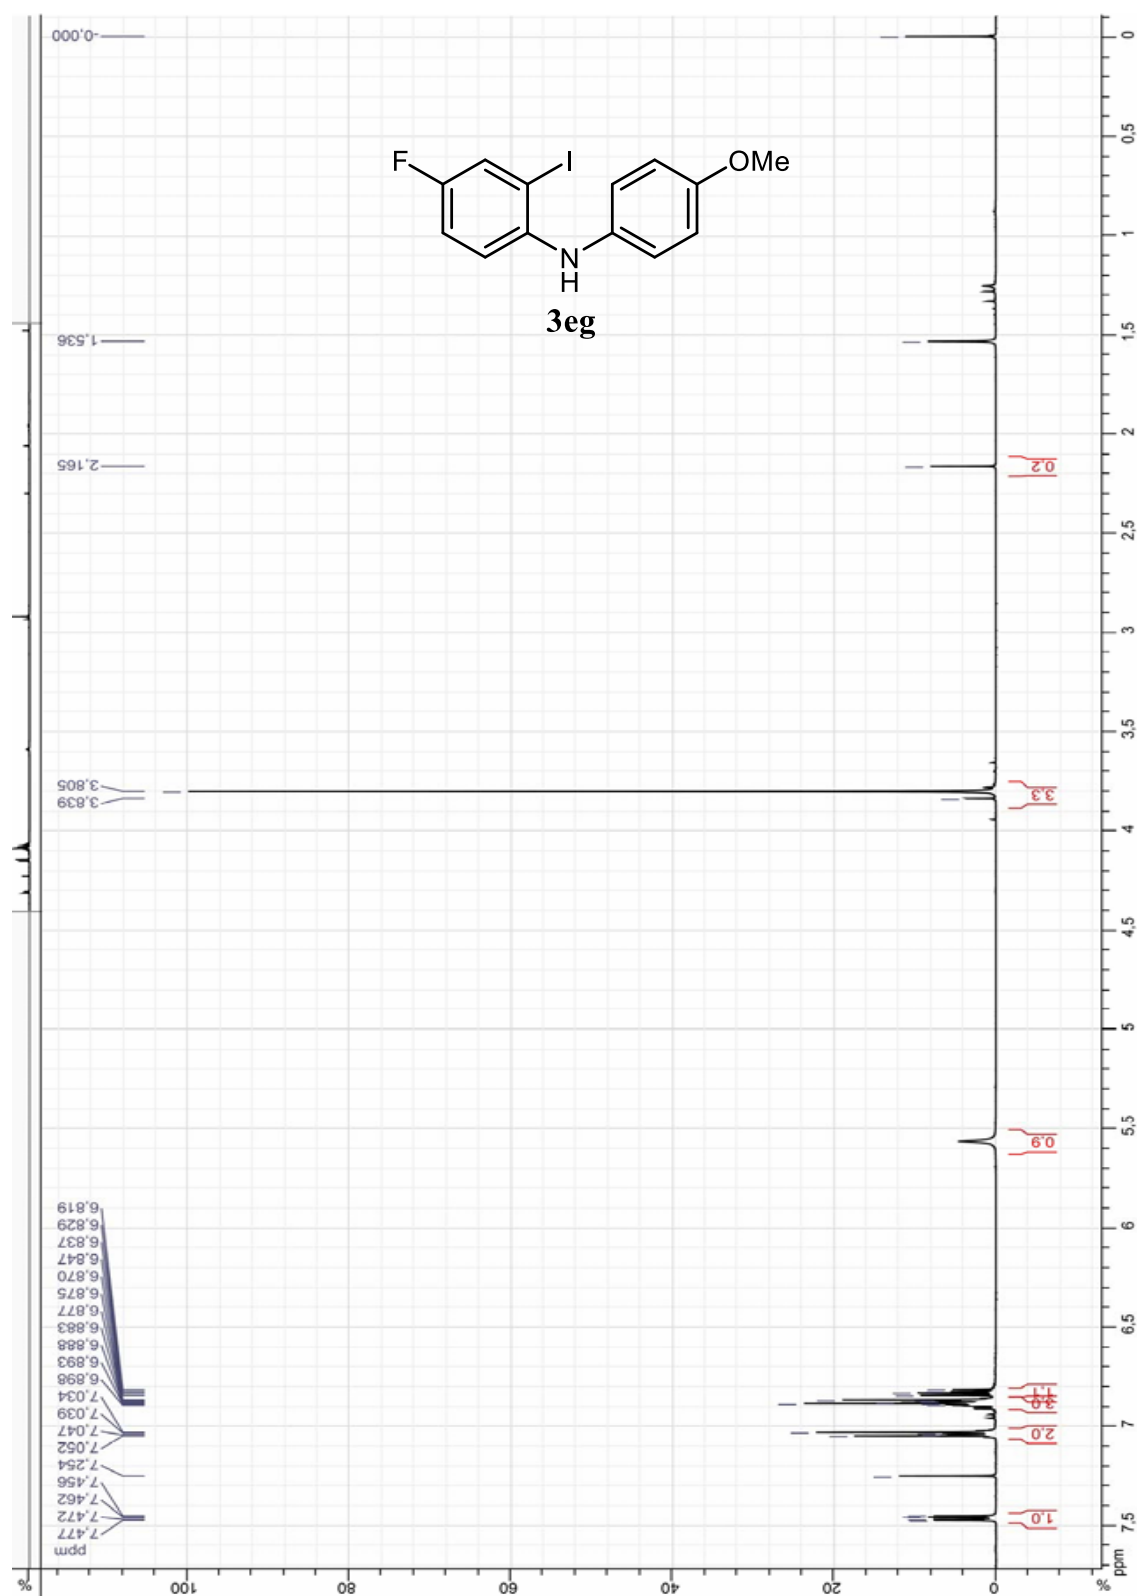



$^1\text{H}$  NMR spectrum of 4-chloro-2-iodo-*N*-(4-methoxyphenyl)aniline (**3fg**) in  $\text{CDCl}_3$

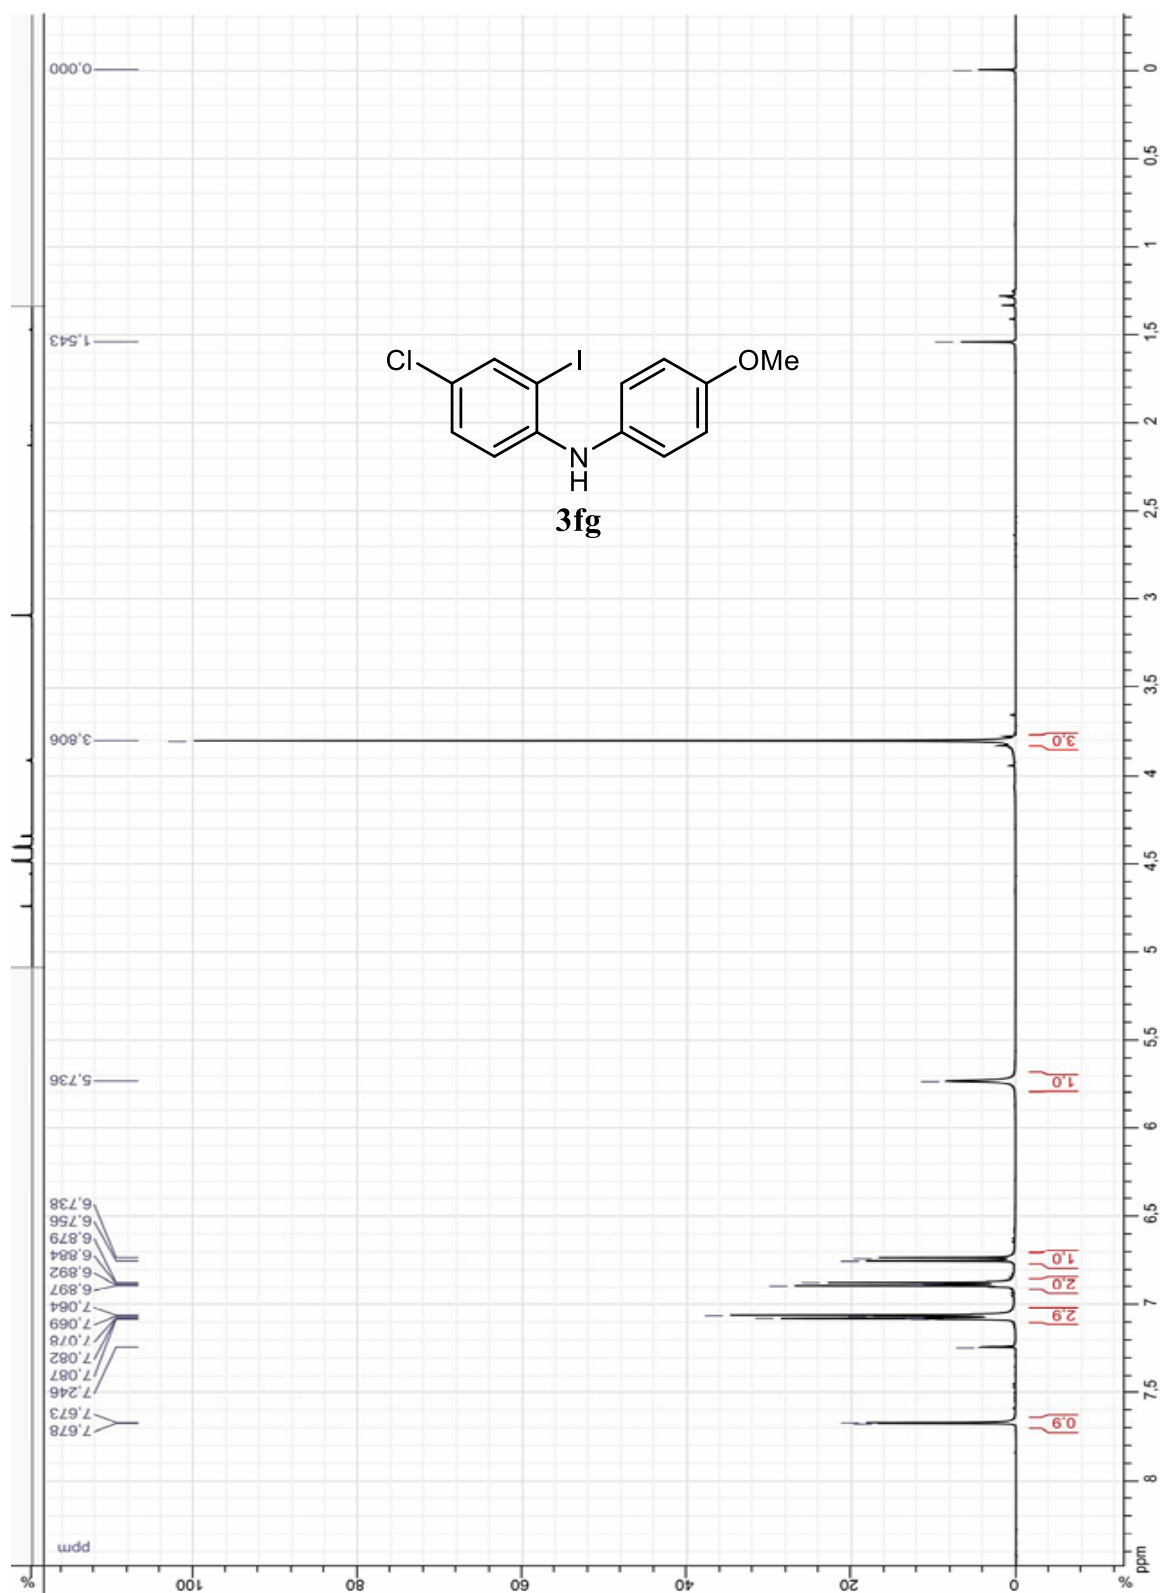

$^1\text{H}$  NMR spectrum of 4-bromo-2-iodo-*N*-(4-methoxyphenyl)aniline (**3gg**) in  $\text{CDCl}_3$

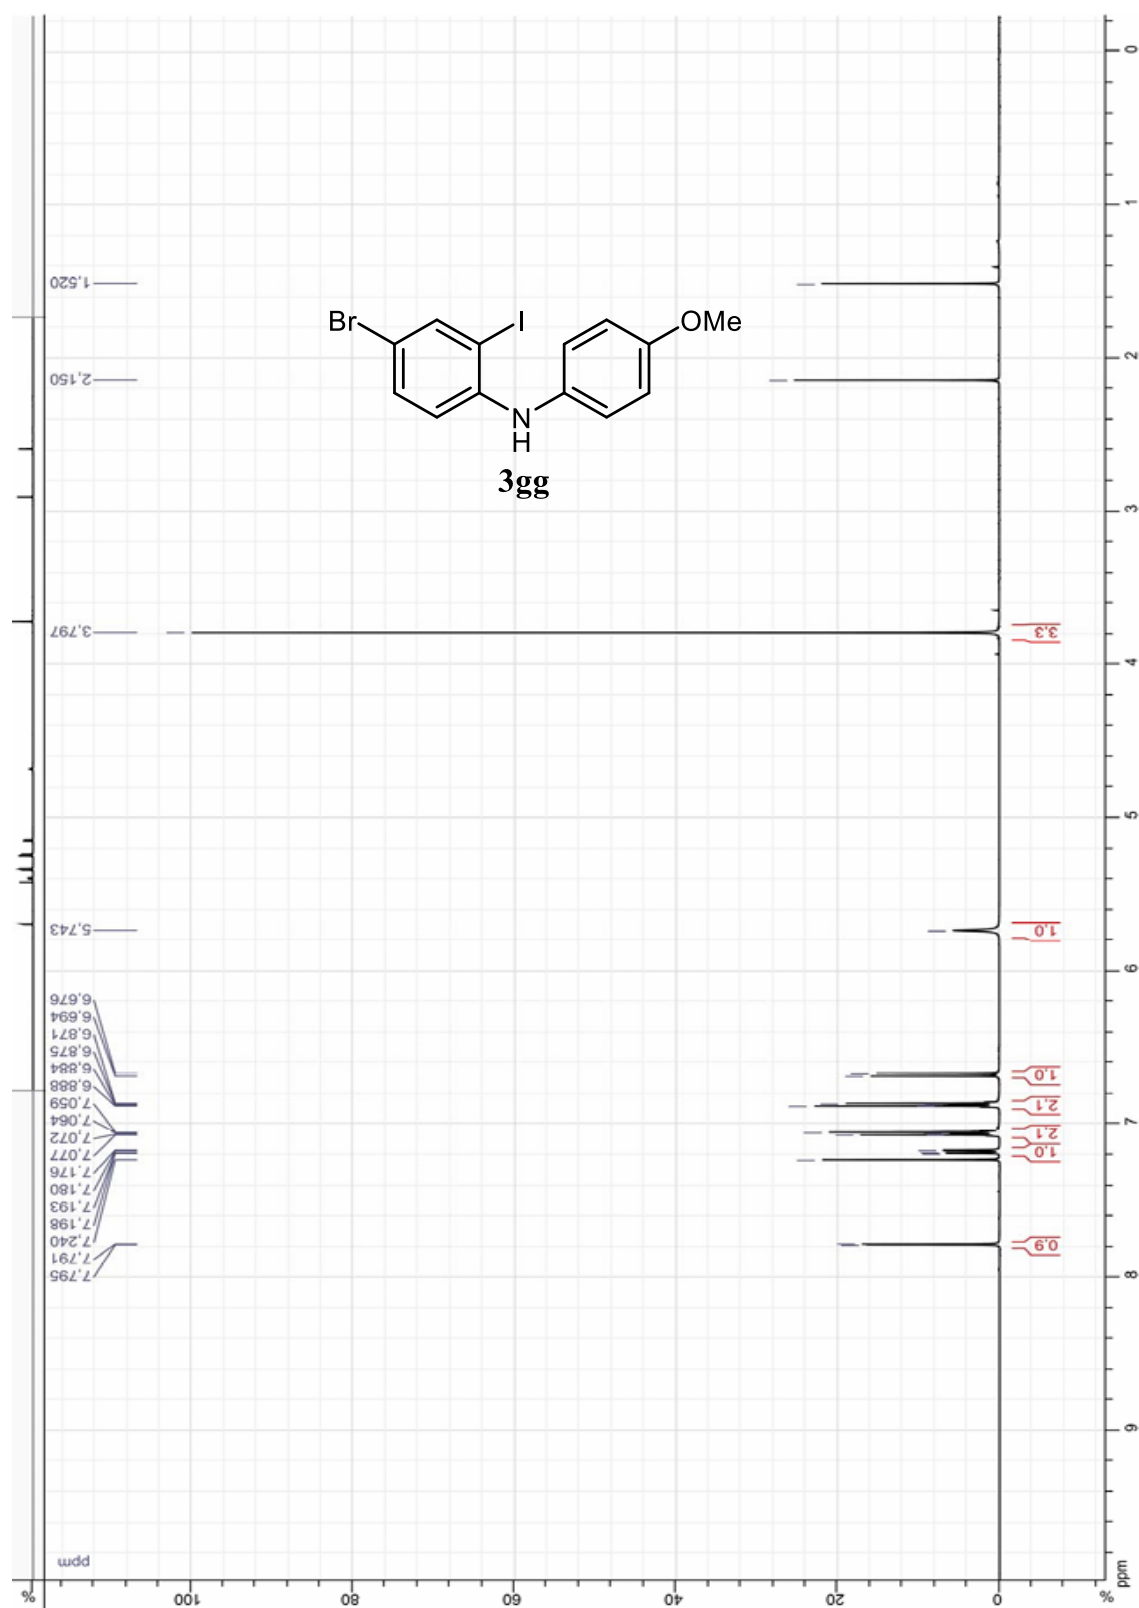

$^1\text{H}$  NMR spectra of methyl 3-iodo-4-((4-methoxyphenyl)amino)benzoate (**3hg**) in  $\text{CDCl}_3$

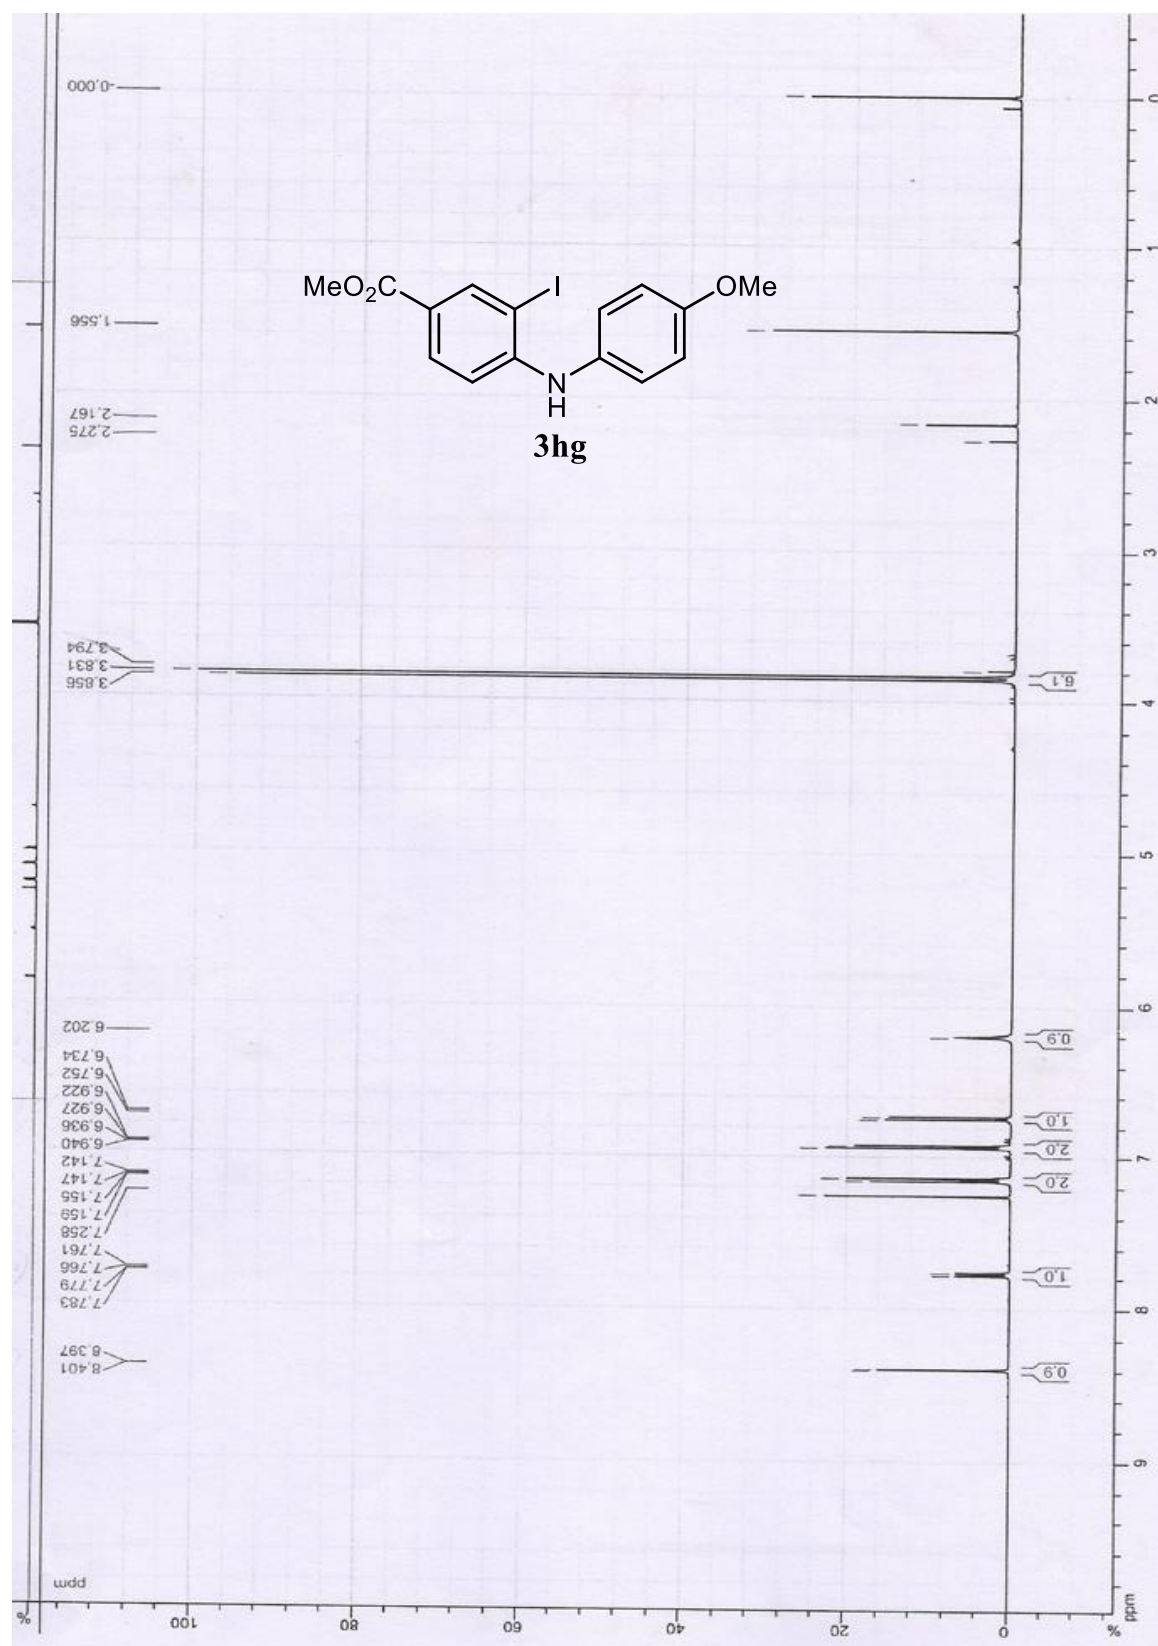

Chemical structure of **3ig** is shown: 1-(4-methoxyphenyl)-2-iodo-4-nitrobenzene.

<sup>1</sup>H NMR spectrum (CDCl<sub>3</sub>) data:

| Chemical Shift (ppm)       | Integration |
|----------------------------|-------------|
| 8.616, 8.615, 8.611, 8.610 | 0.9         |
| 8.001, 7.996, 7.983, 7.978 | 1.0         |
| 7.26, 7.26, 7.26           | 2.0         |
| 7.157, 7.154, 7.144, 7.140 | 2.0         |
| 6.954, 6.950, 6.941        | 2.0         |
| 6.936, 6.676, 6.656, 6.449 | 1.0         |
| 3.829                      | 3.2         |
| 1.519                      | 1.0         |
| -0.019                     | 0.9         |

$^1\text{H}$  NMR and  $^{13}\text{C}$  NMR spectra of 2-iodo-*N*-(4-methoxyphenyl)-4-methylaniline (**3bg**) in  $\text{CDCl}_3$

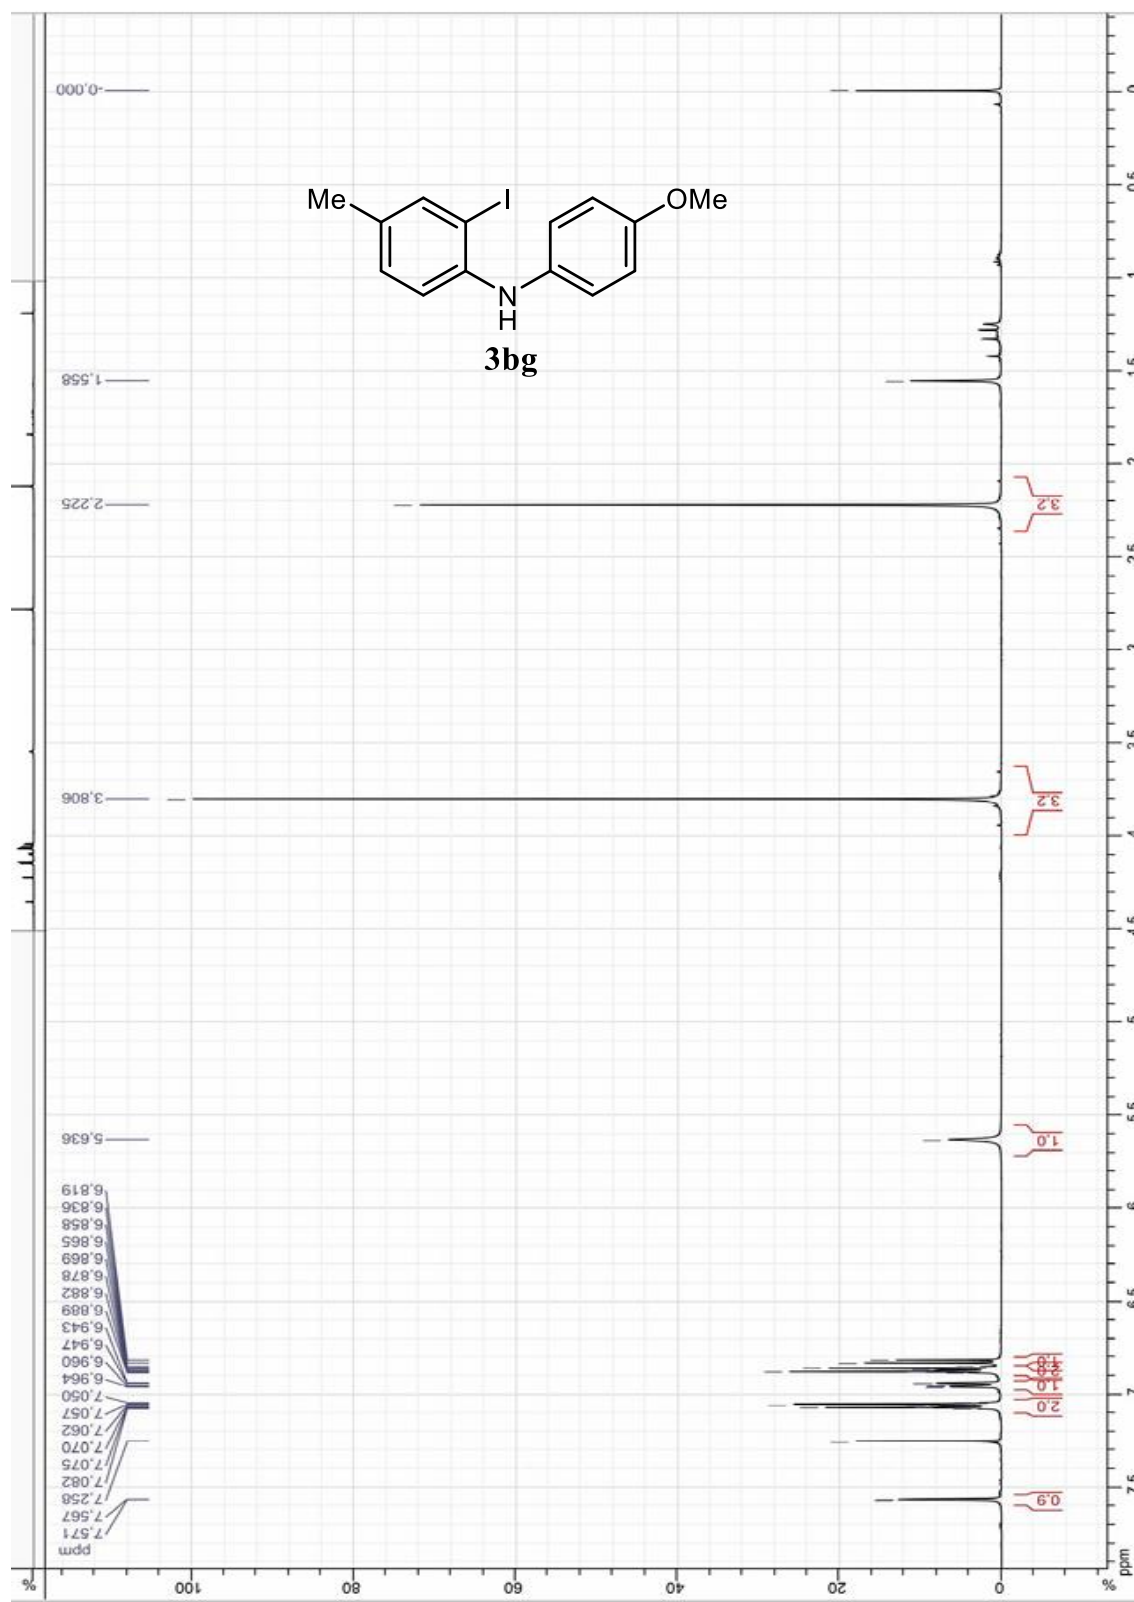

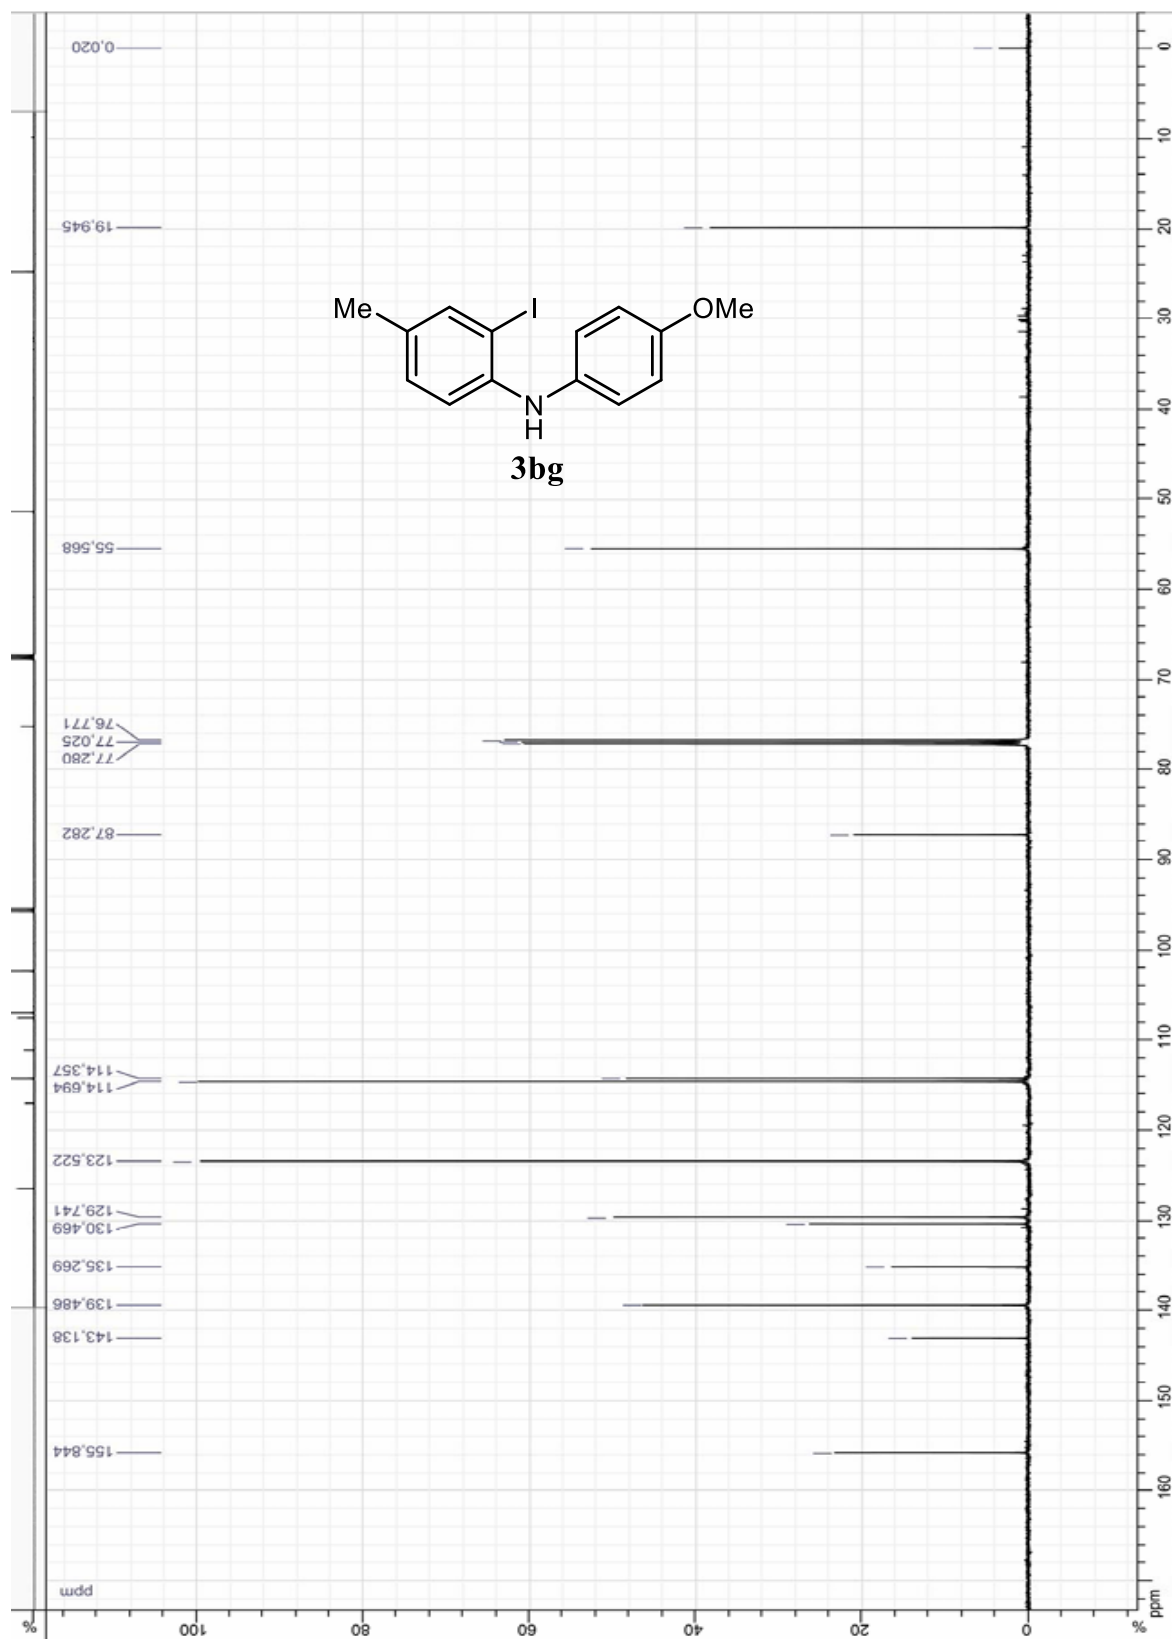

$^1\text{H}$  NMR and  $^{13}\text{C}$  NMR spectra of 4-(*tert*-butyl)-2-iodo-*N*-(*o*-tolyl)aniline (**3cn**) in  $\text{CDCl}_3$

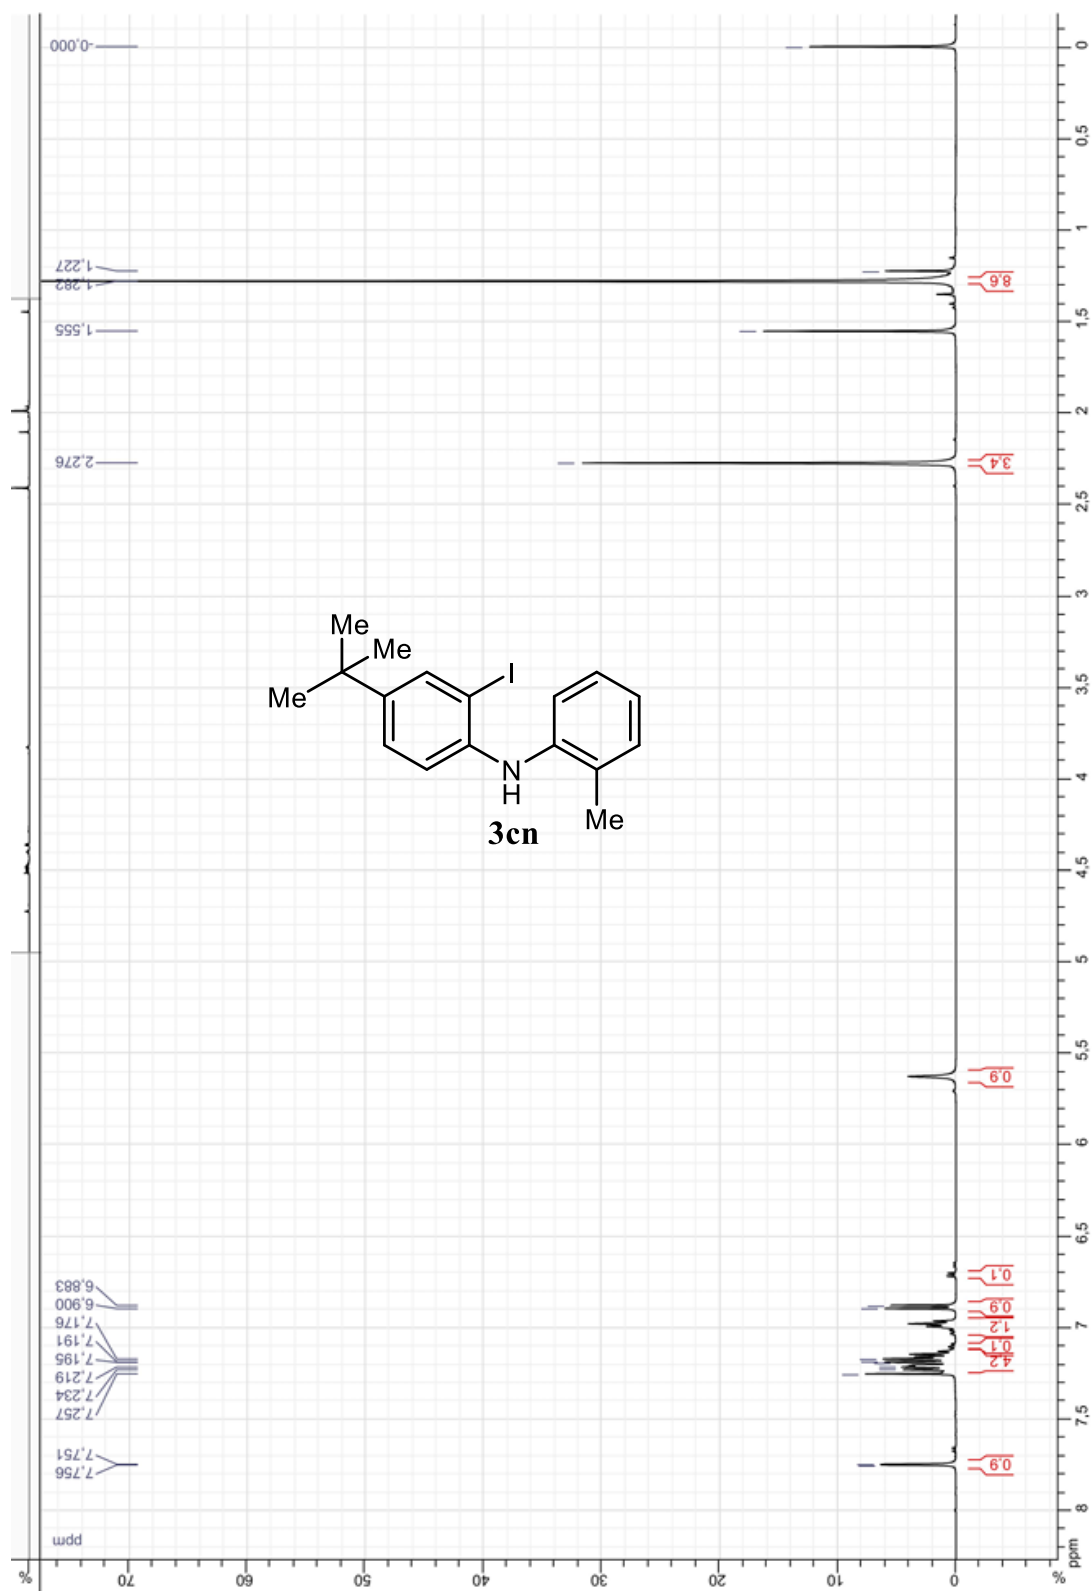

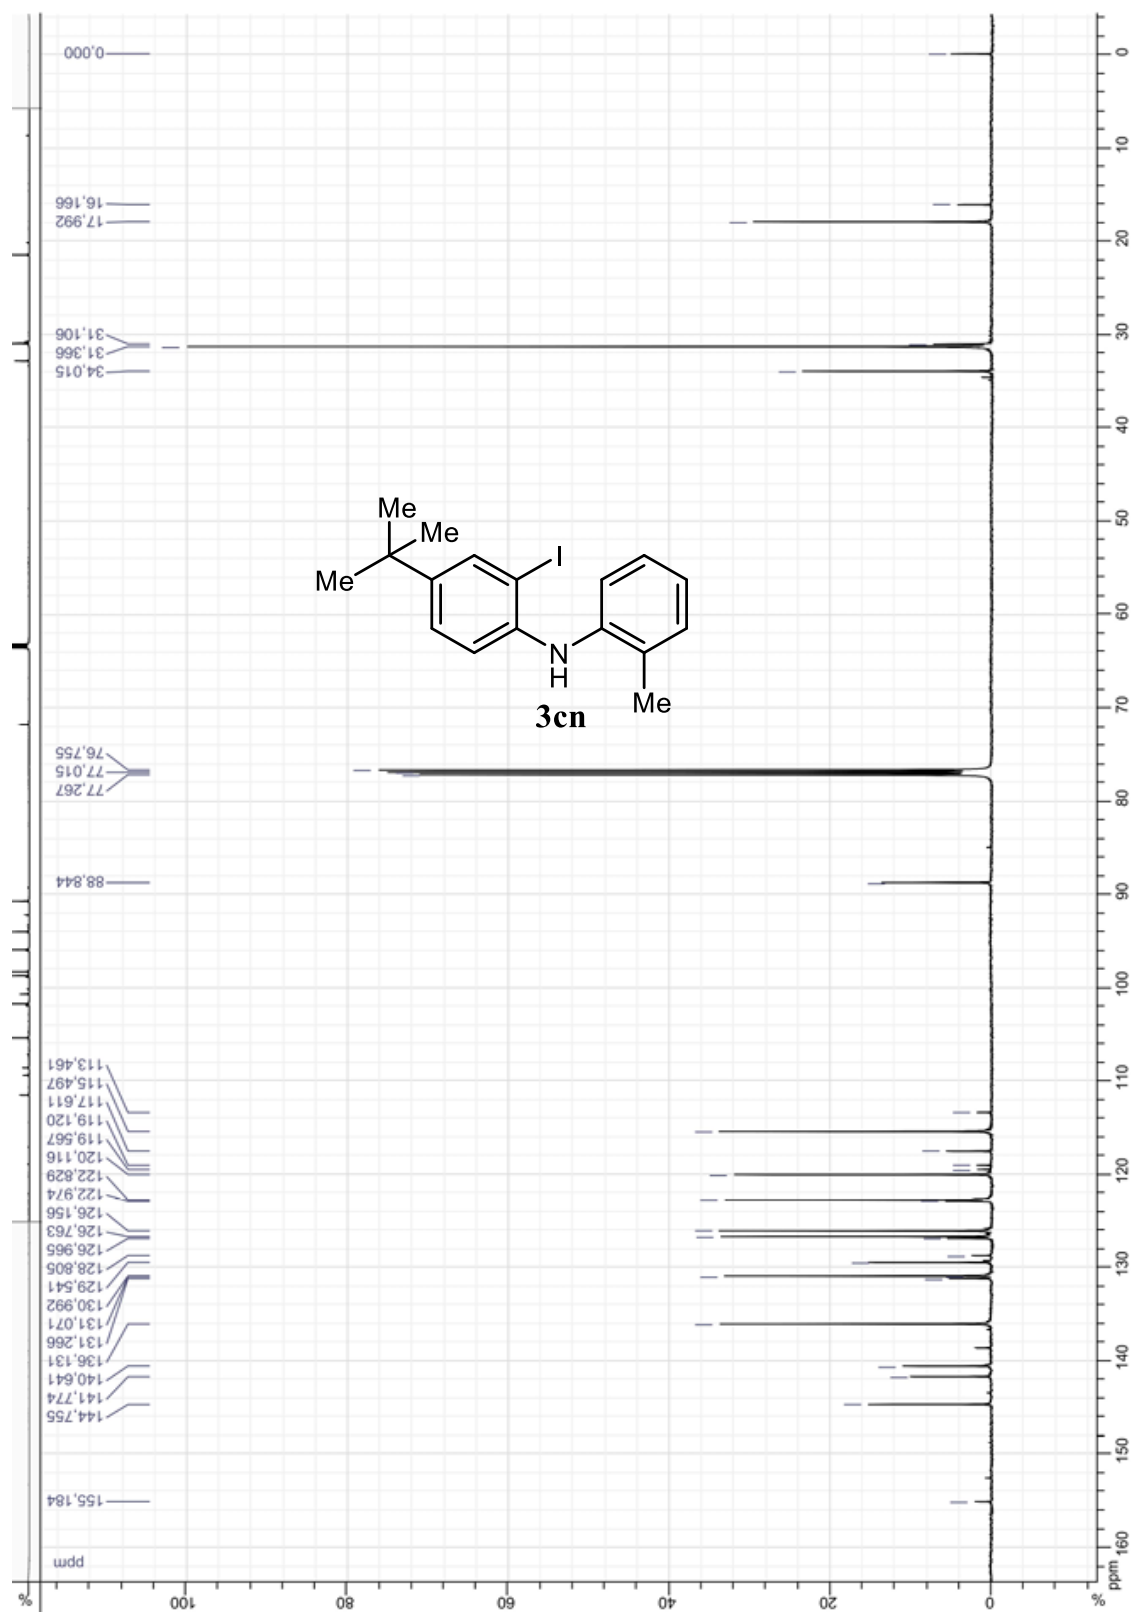



[illegible]

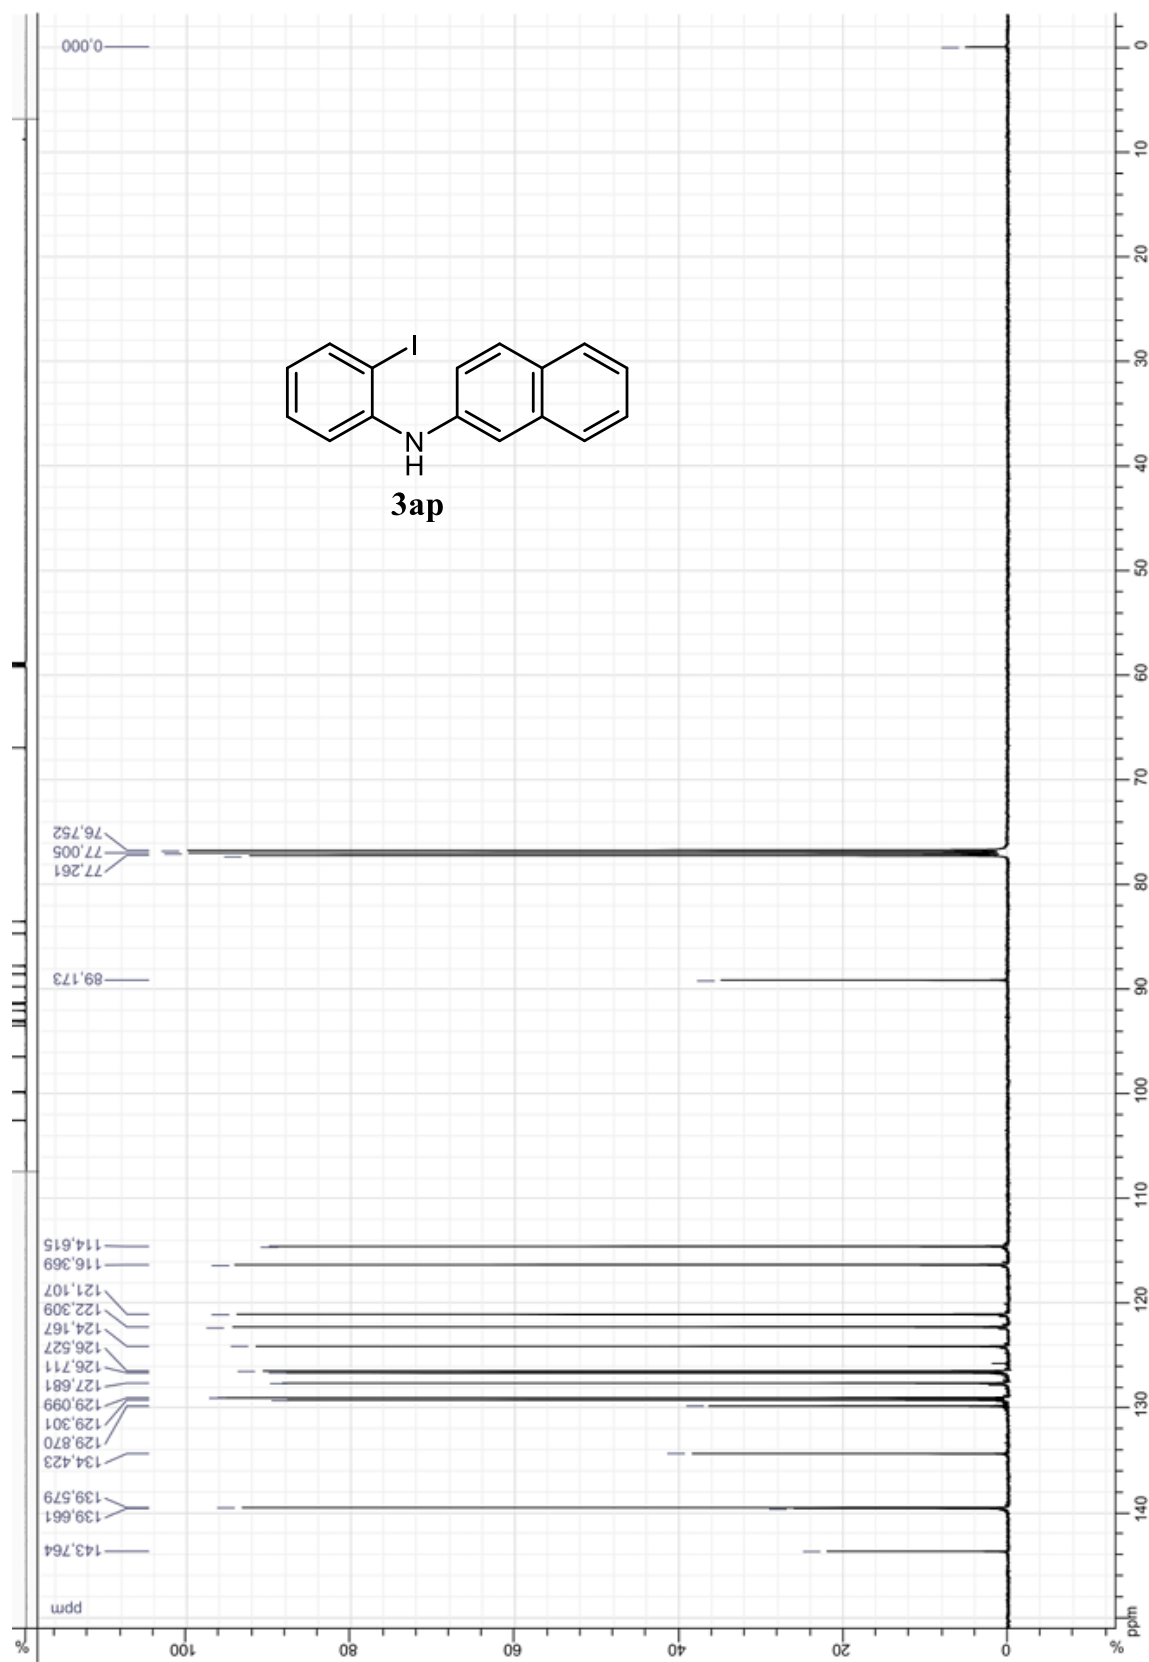

$^1\text{H}$  NMR and  $^{13}\text{C}$  NMR spectra of *N*-(2-iodo-4-methylphenyl)naphthalen-2-amine (**3bp**) in  $\text{CDCl}_3$

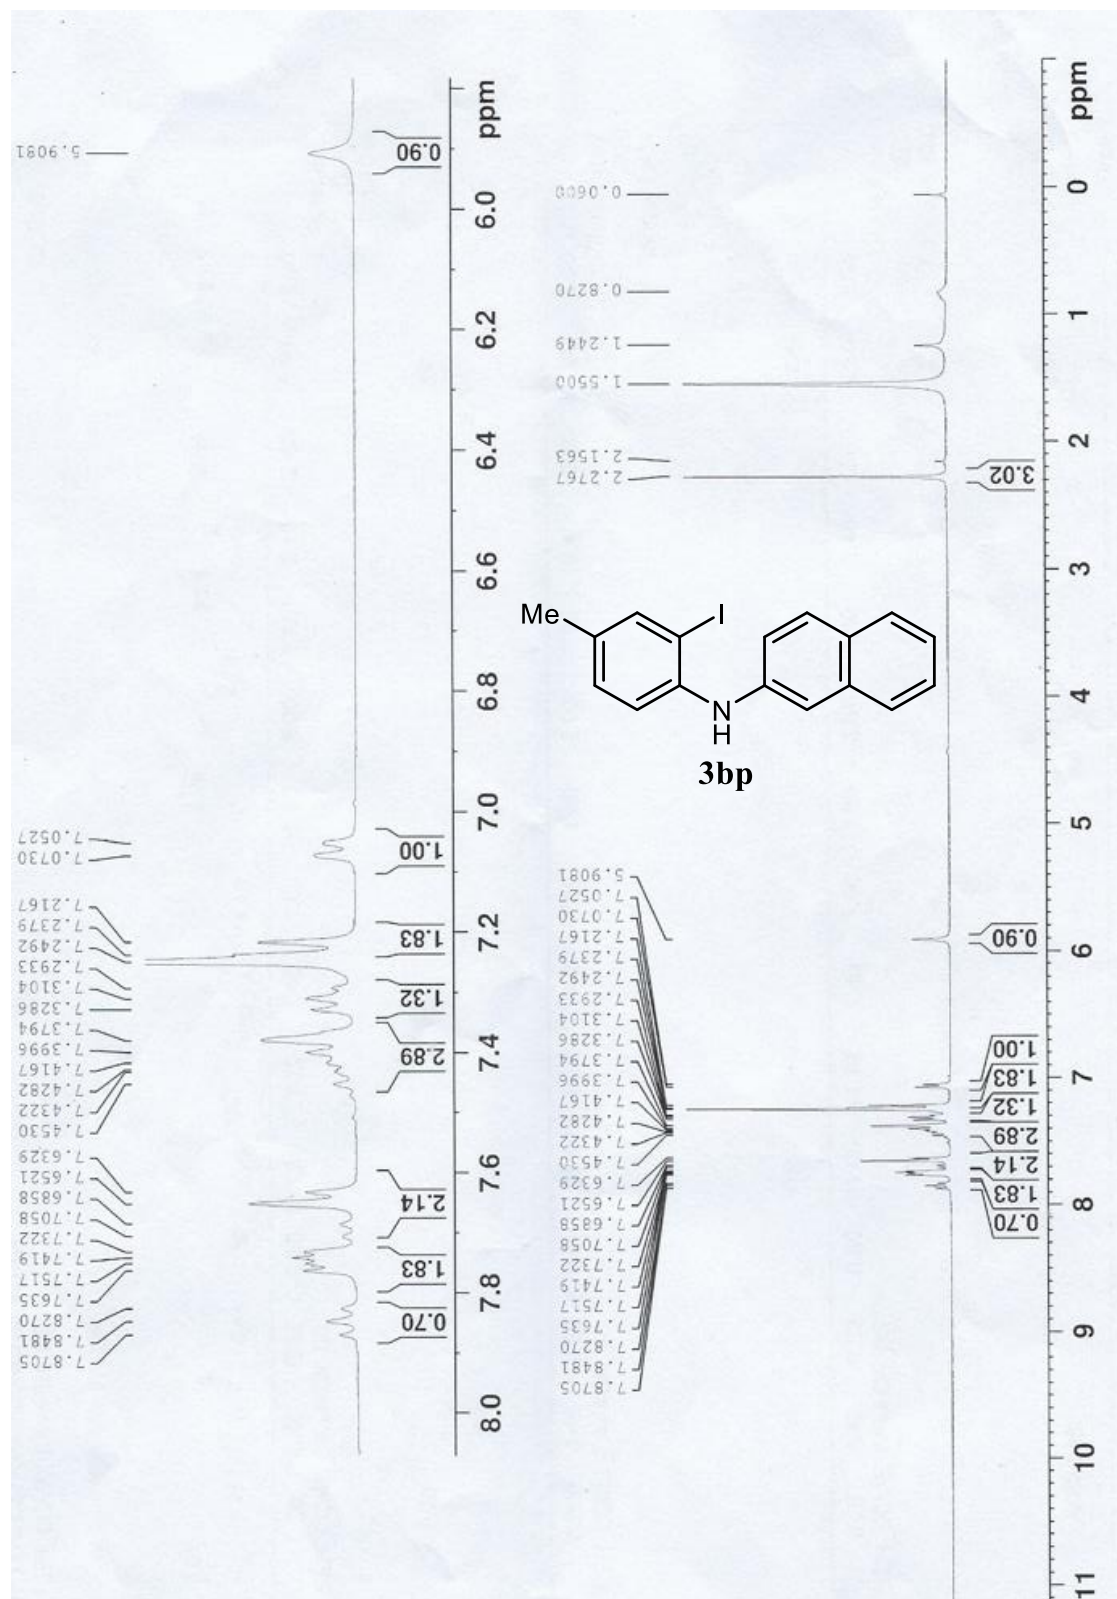

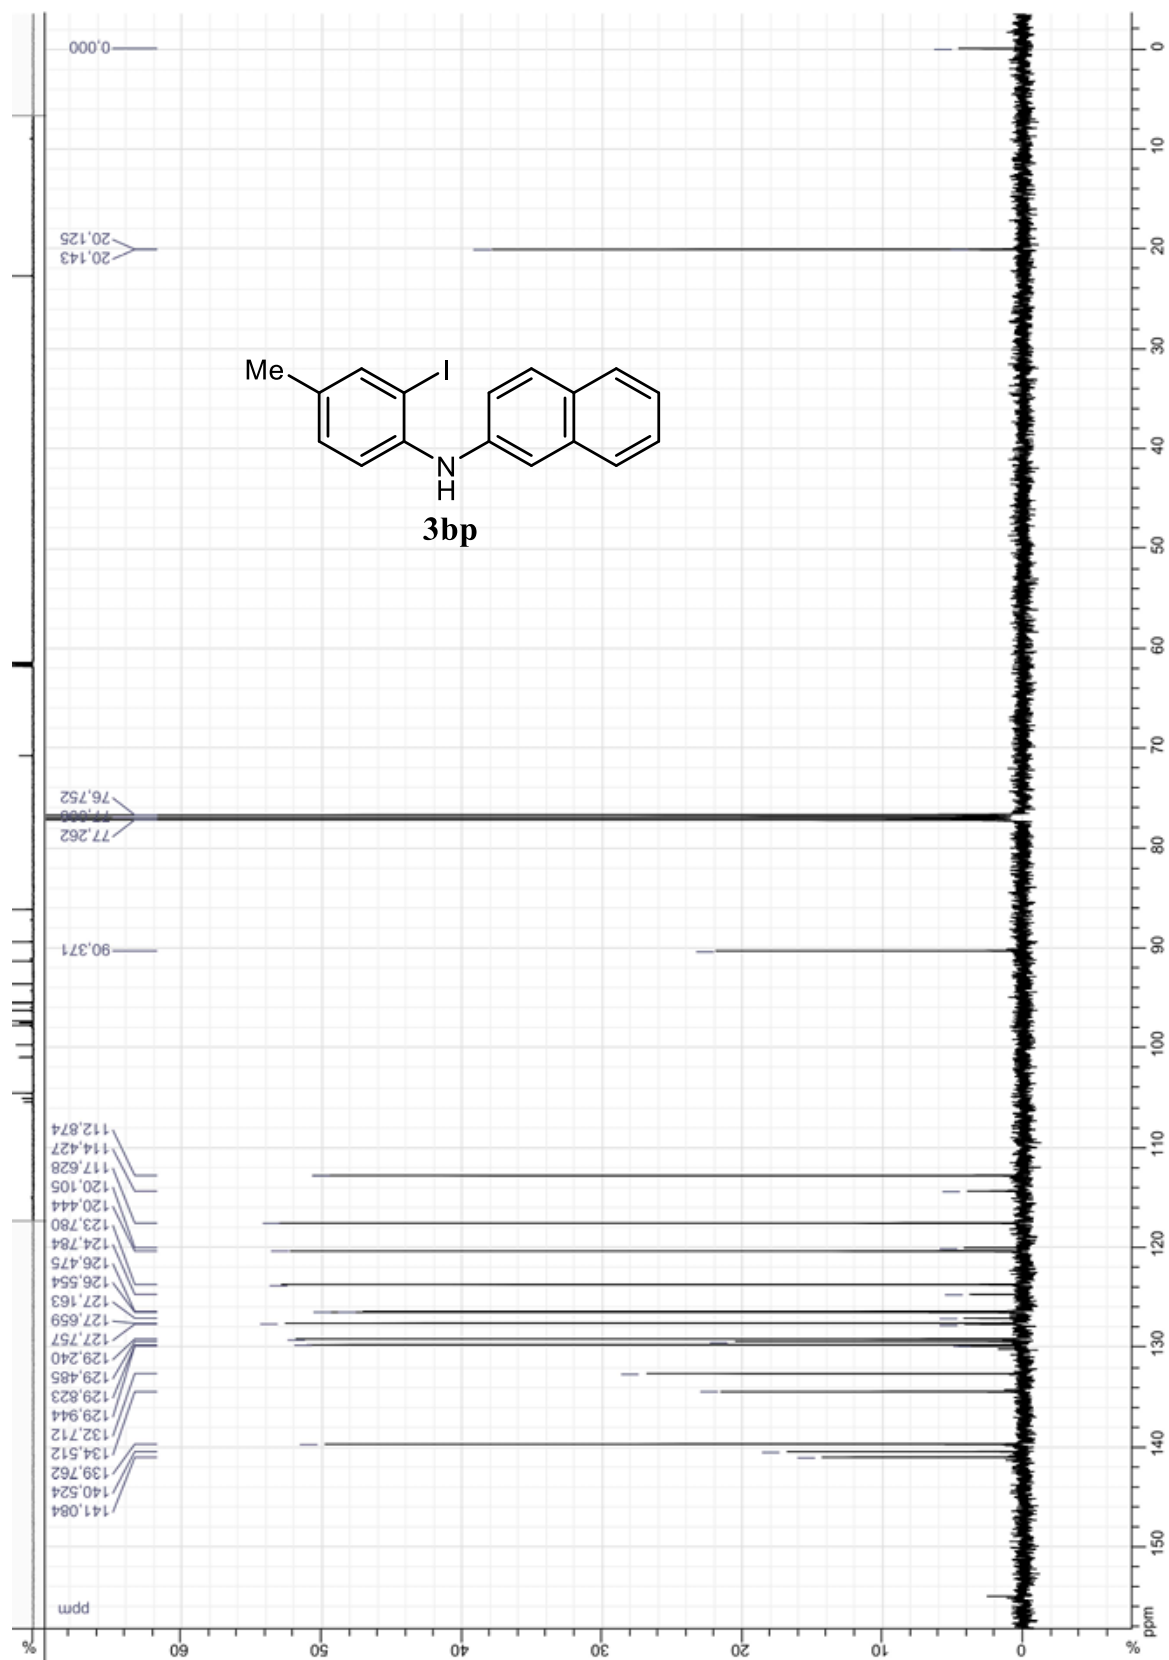

$^1\text{H}$  NMR spectrum of *N*-(2-iodophenyl)naphthalen-1-amine (**3aq**) in  $\text{CDCl}_3$

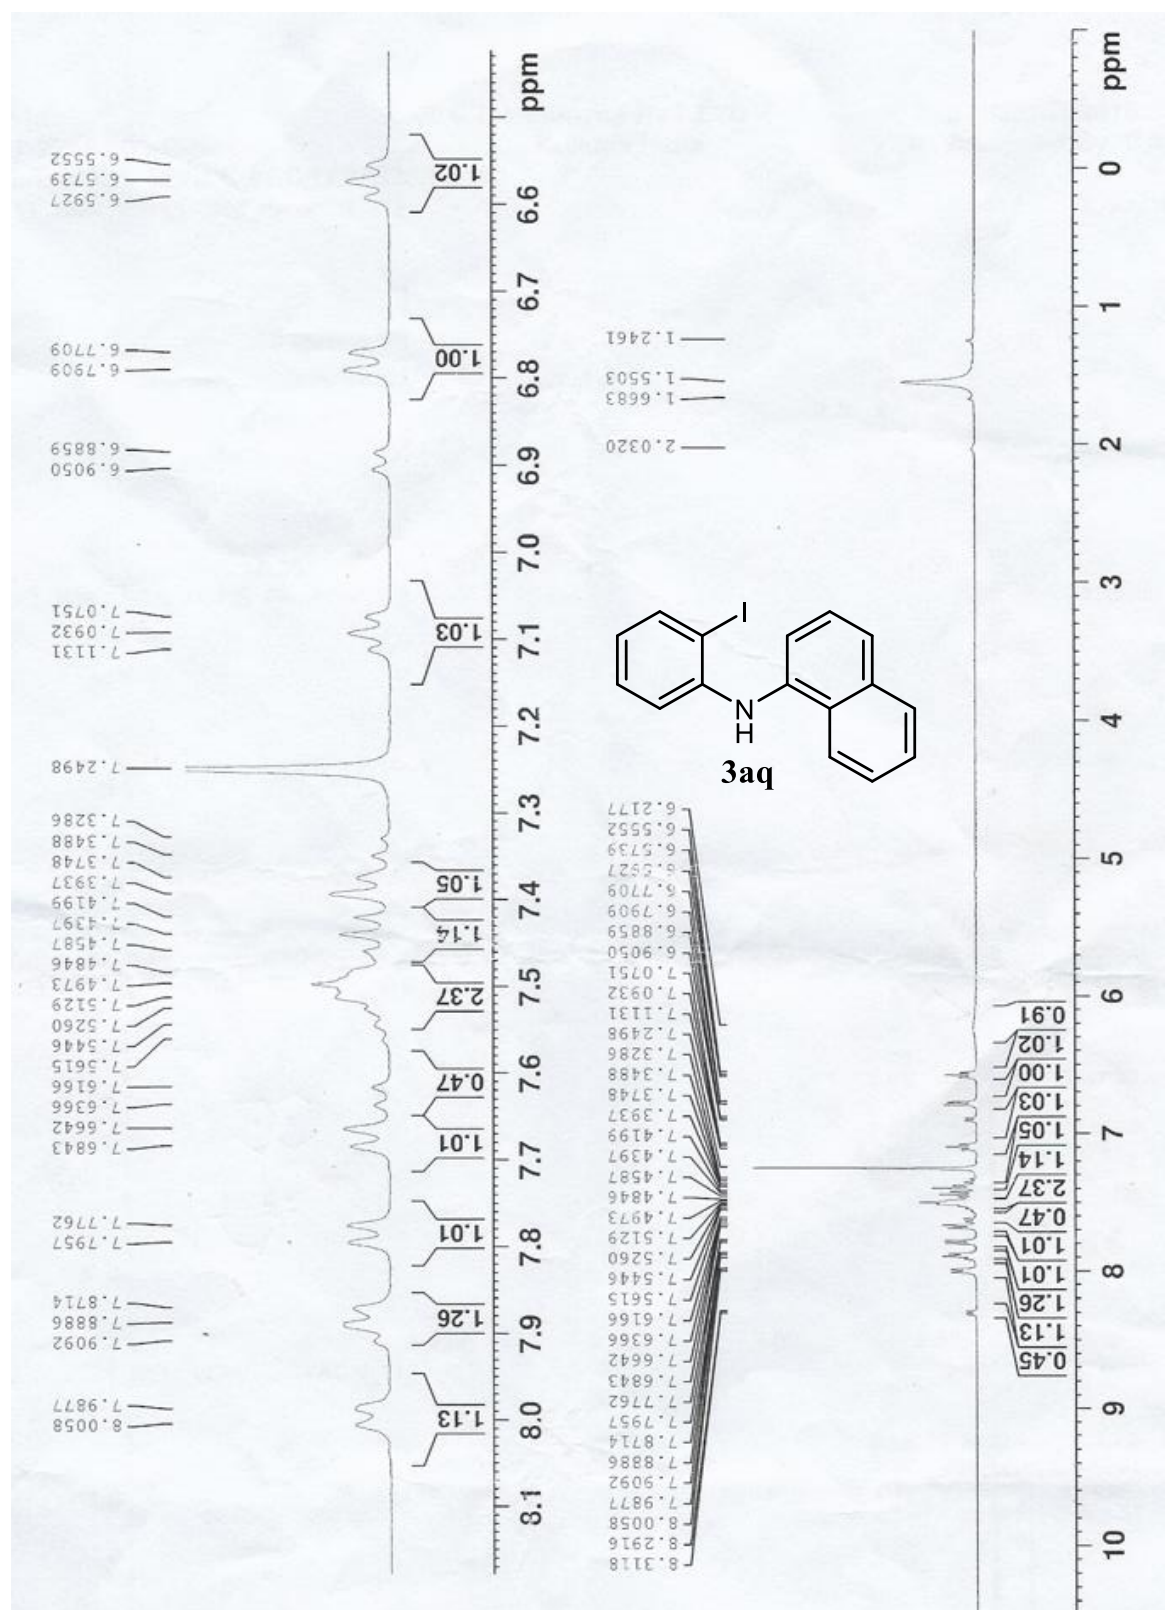



$^1\text{H}$  NMR spectrum of *N*-(2-iodo-4-methylphenyl)naphthalen-1-amine (**3bq**) in  $\text{CDCl}_3$

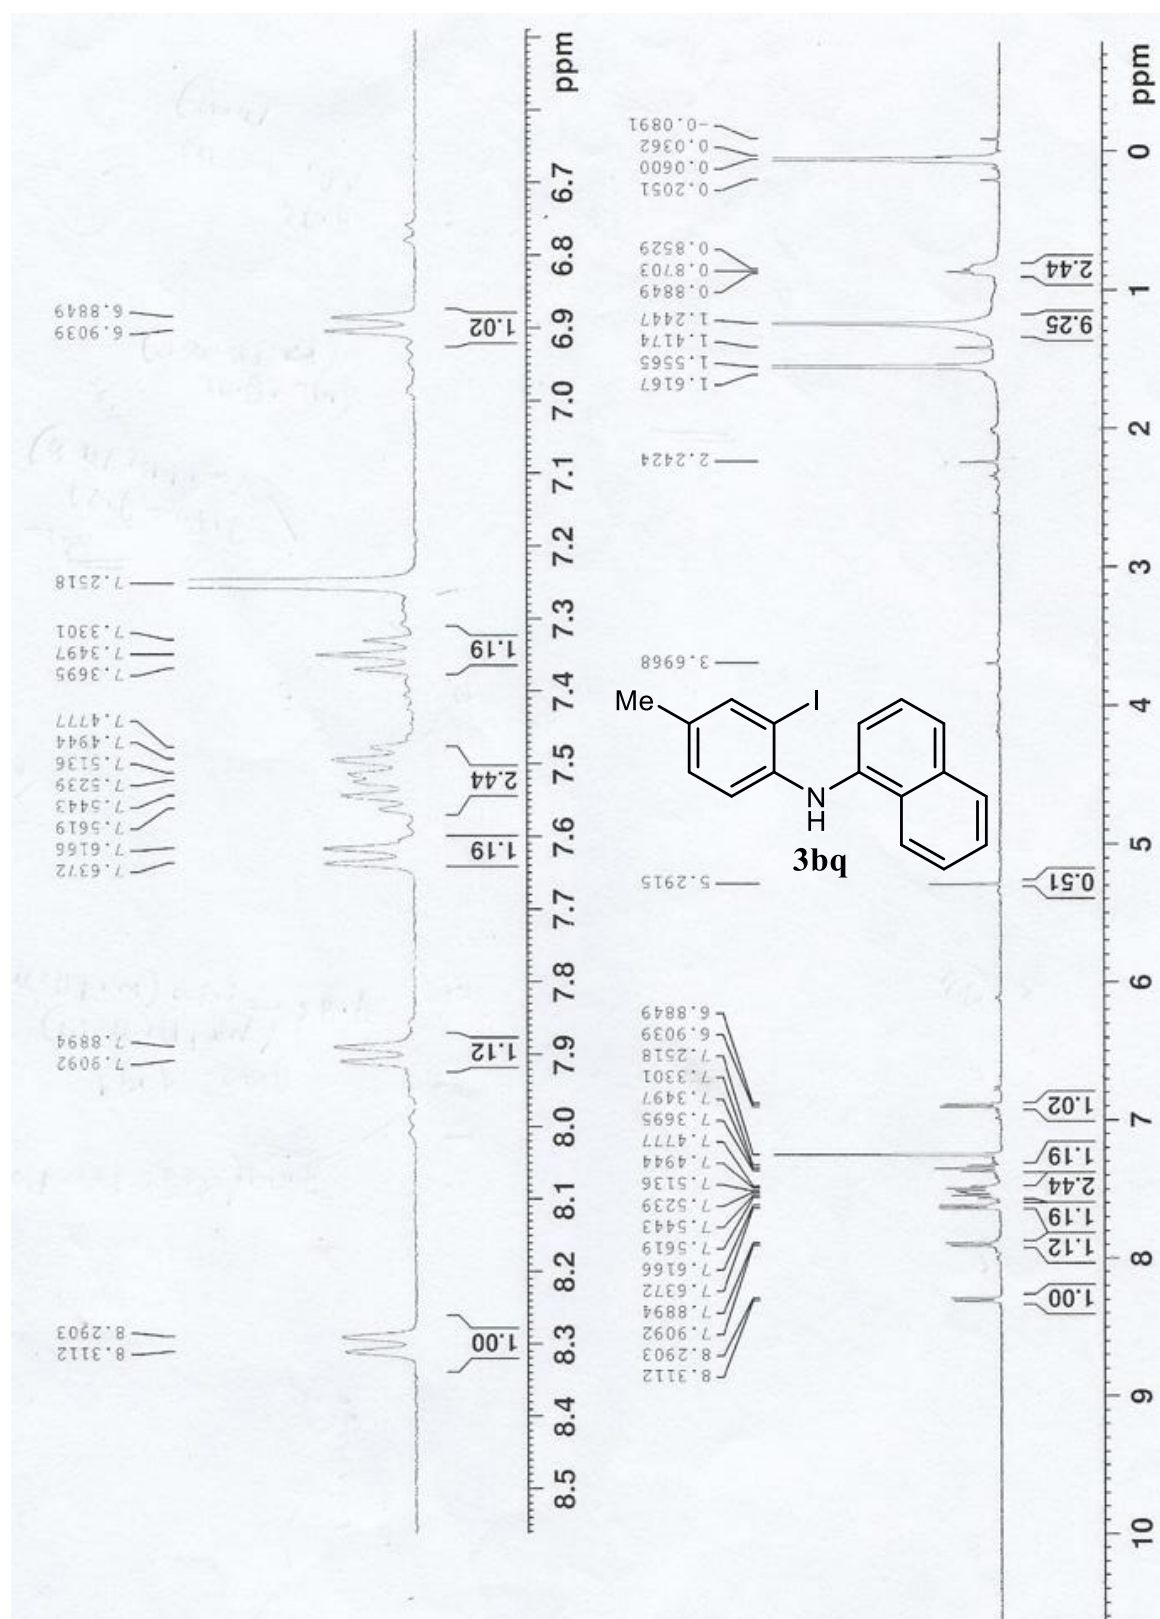

$^1\text{H}$  NMR spectrum of methyl 5-iodo-2-methoxy-4-(phenylamino)benzoate (**3ka**) in  $\text{CDCl}_3$

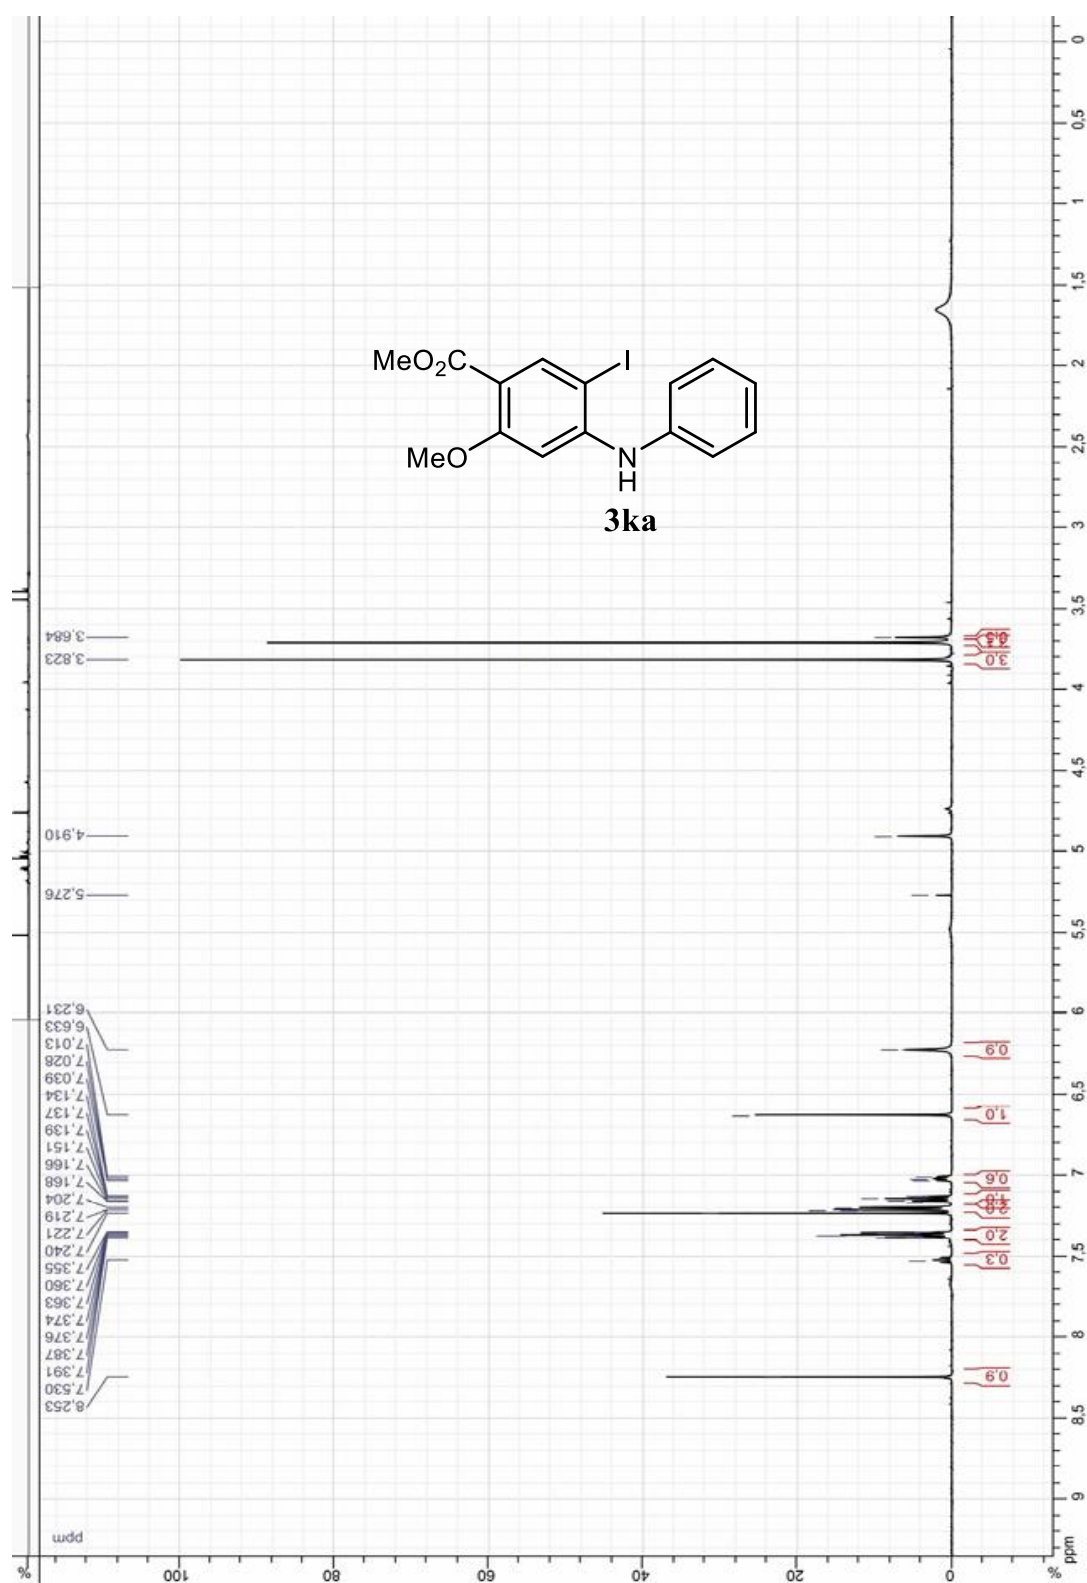

$^1\text{H}$  NMR spectrum of methyl 5-iodo-2-methoxy-4-((3-methoxyphenyl)amino)benzoate (**3kh**) in  $\text{CDCl}_3$

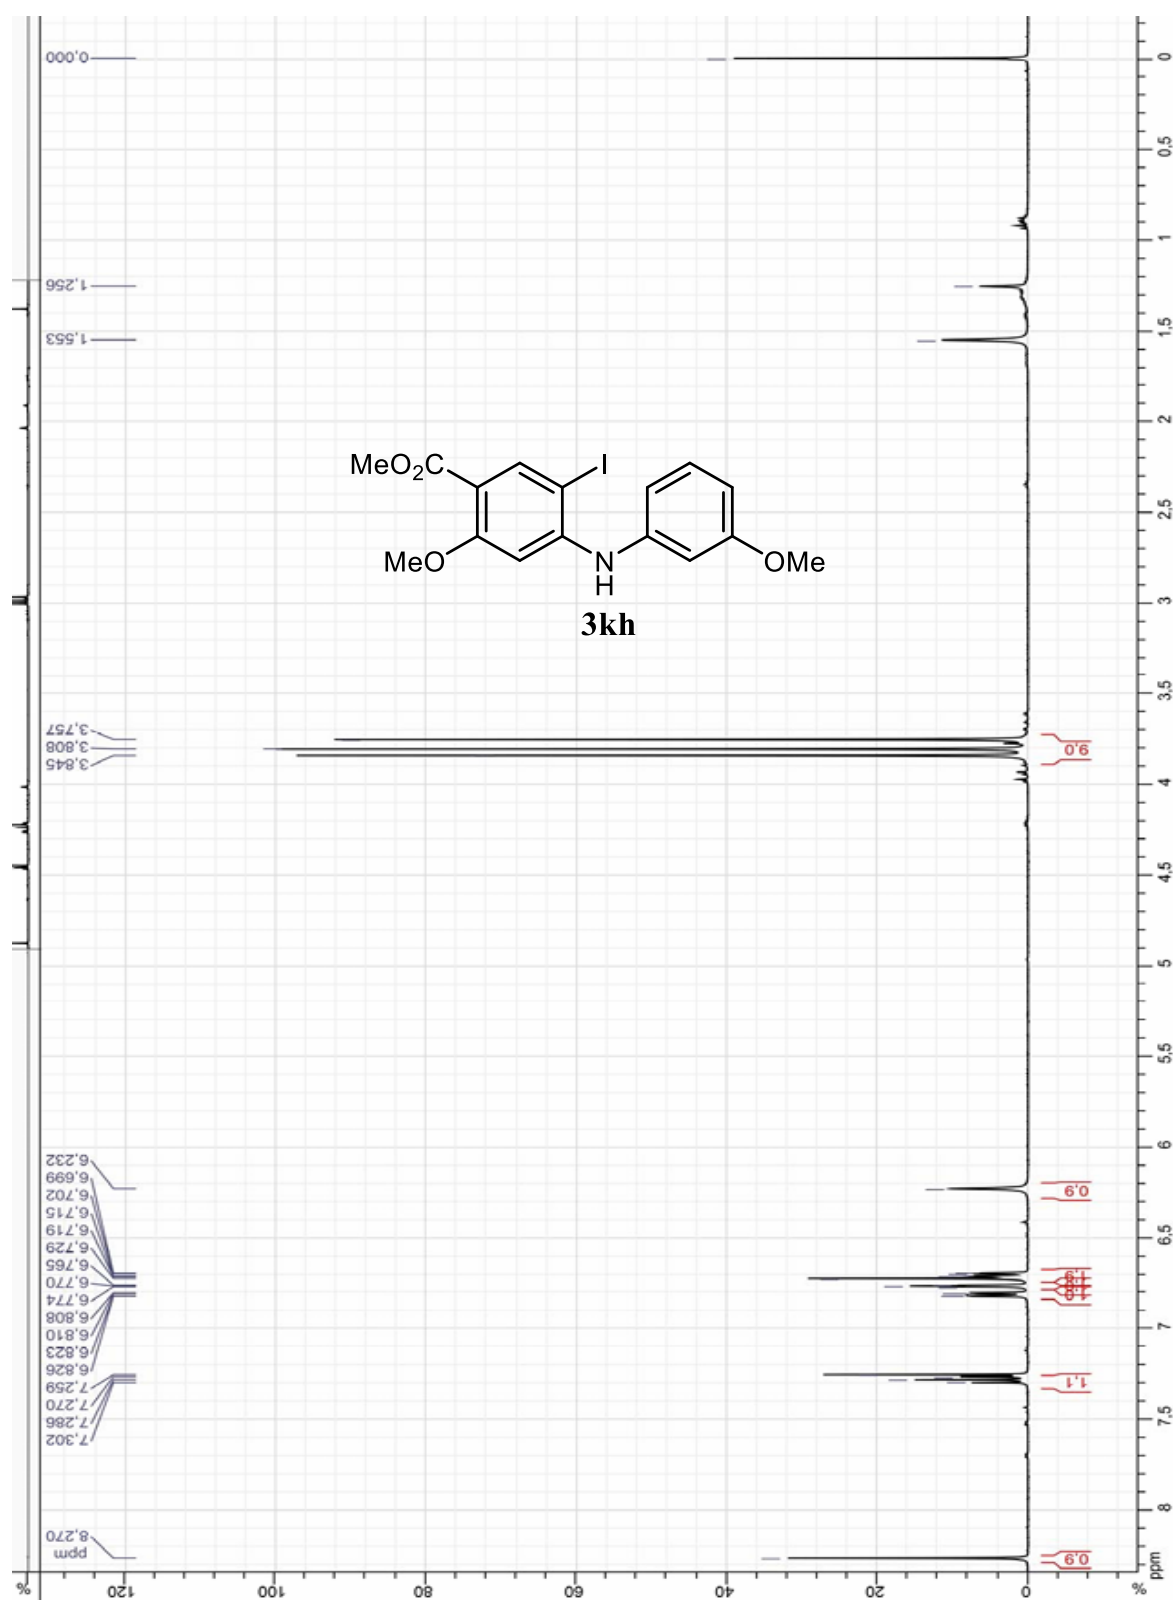



$^1\text{H}$  NMR and  $^{13}\text{C}$  NMR spectra of 4-((2-iodophenyl)amino)benzaldehyde (**3ba-1**) in  $\text{CDCl}_3$

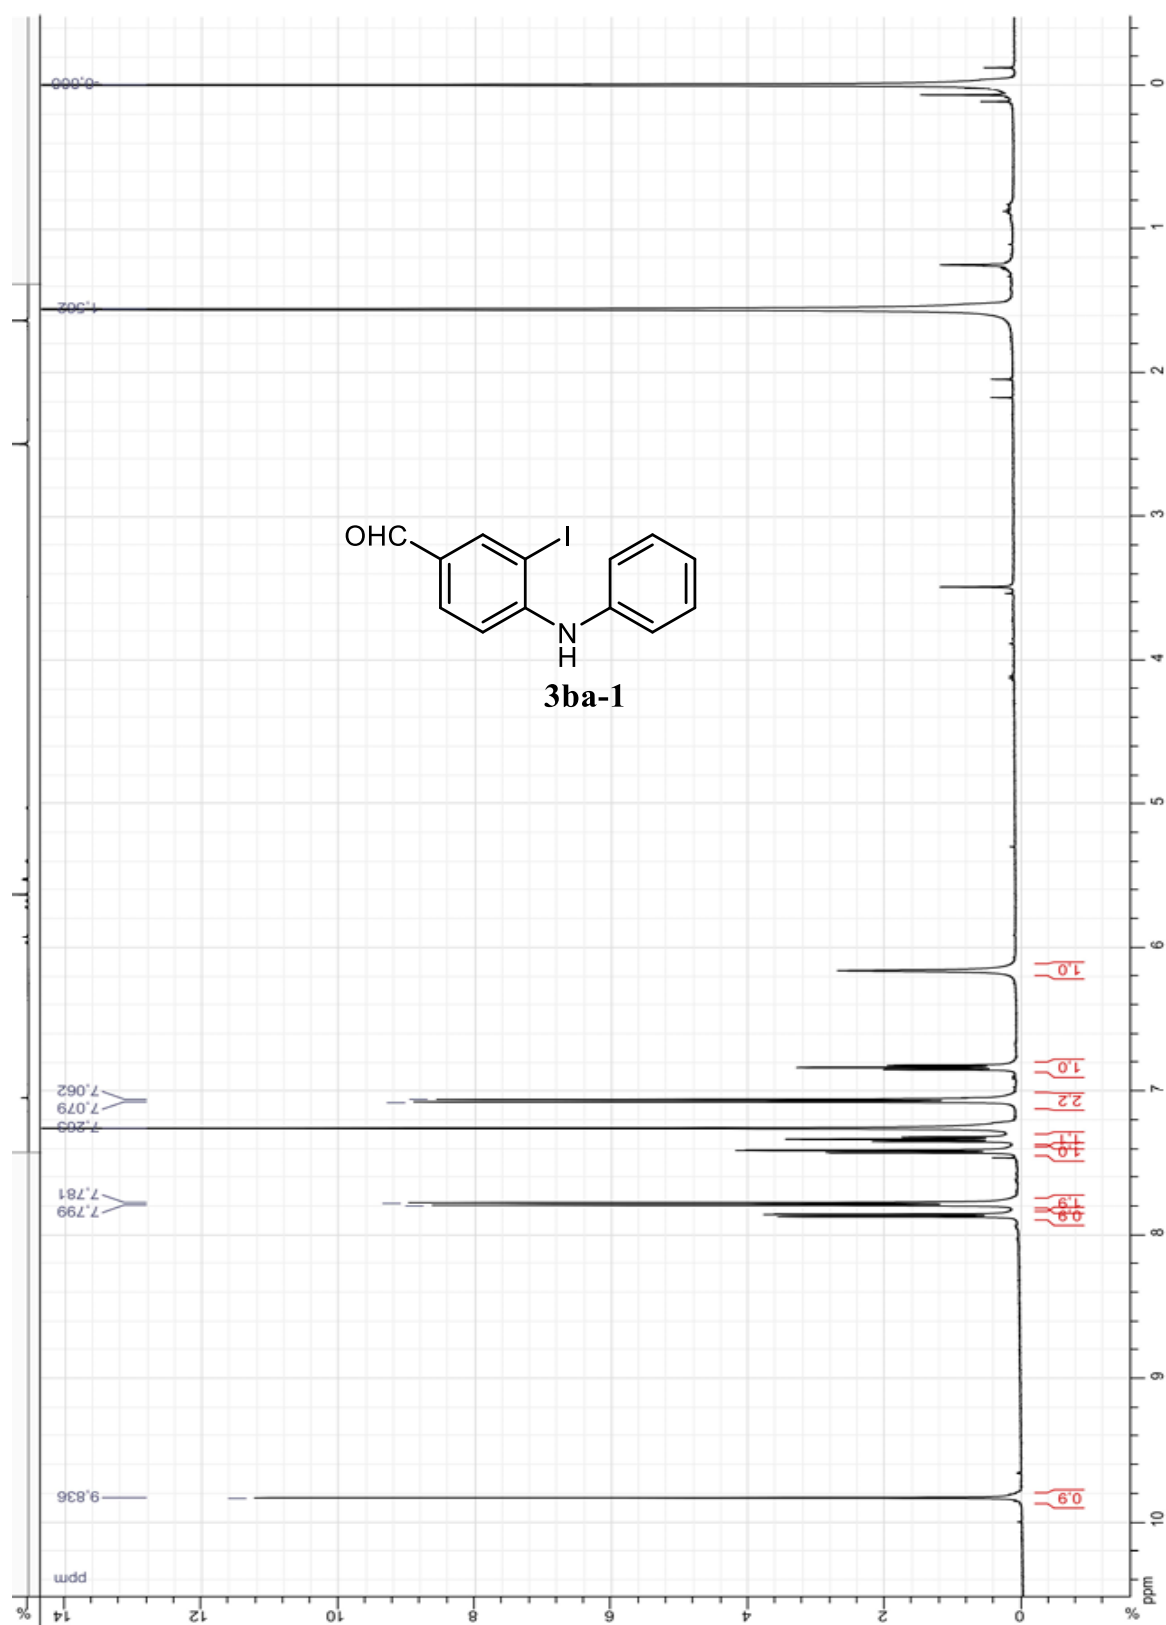

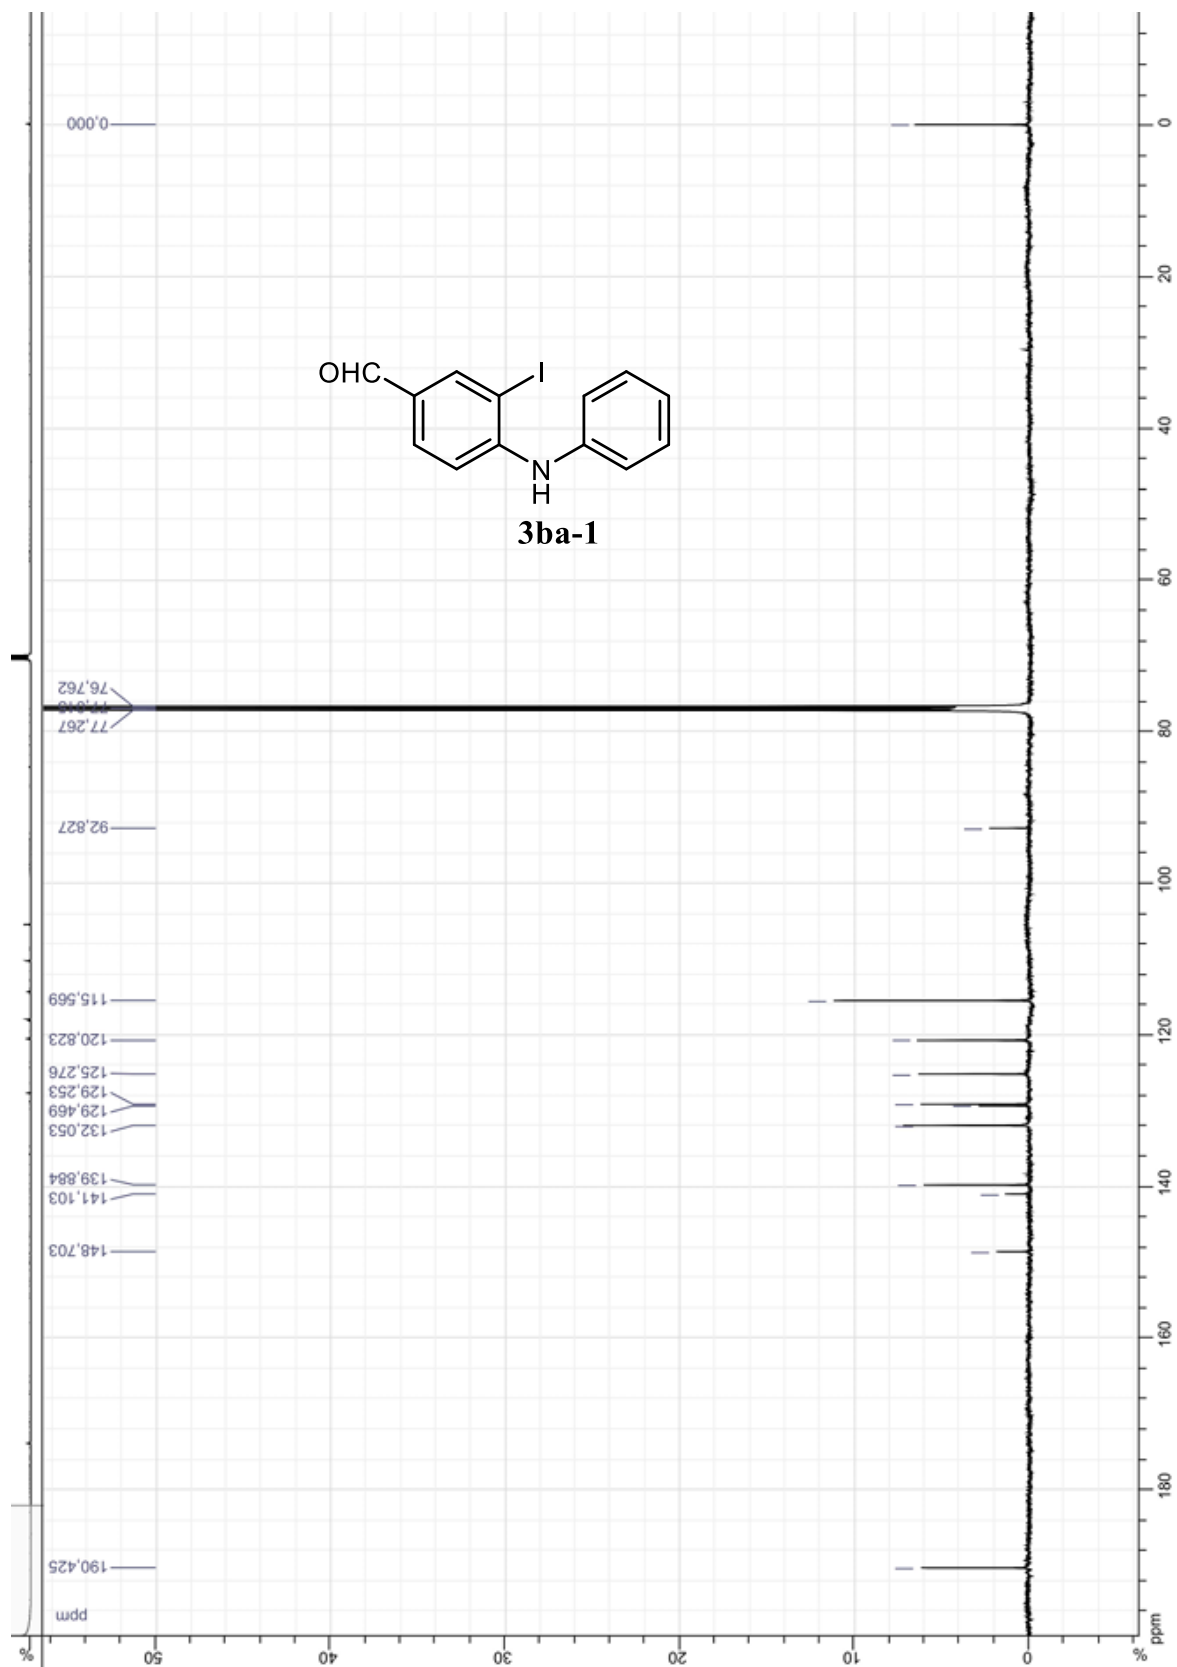

$^1\text{H}$  NMR and  $^{13}\text{C}$  NMR spectra of *N*-(3-iodo-4-(phenylamino)phenyl)acetamide (**3ia-1**) in DMSO- $\text{D}_6$  and  $\text{CDCl}_3$

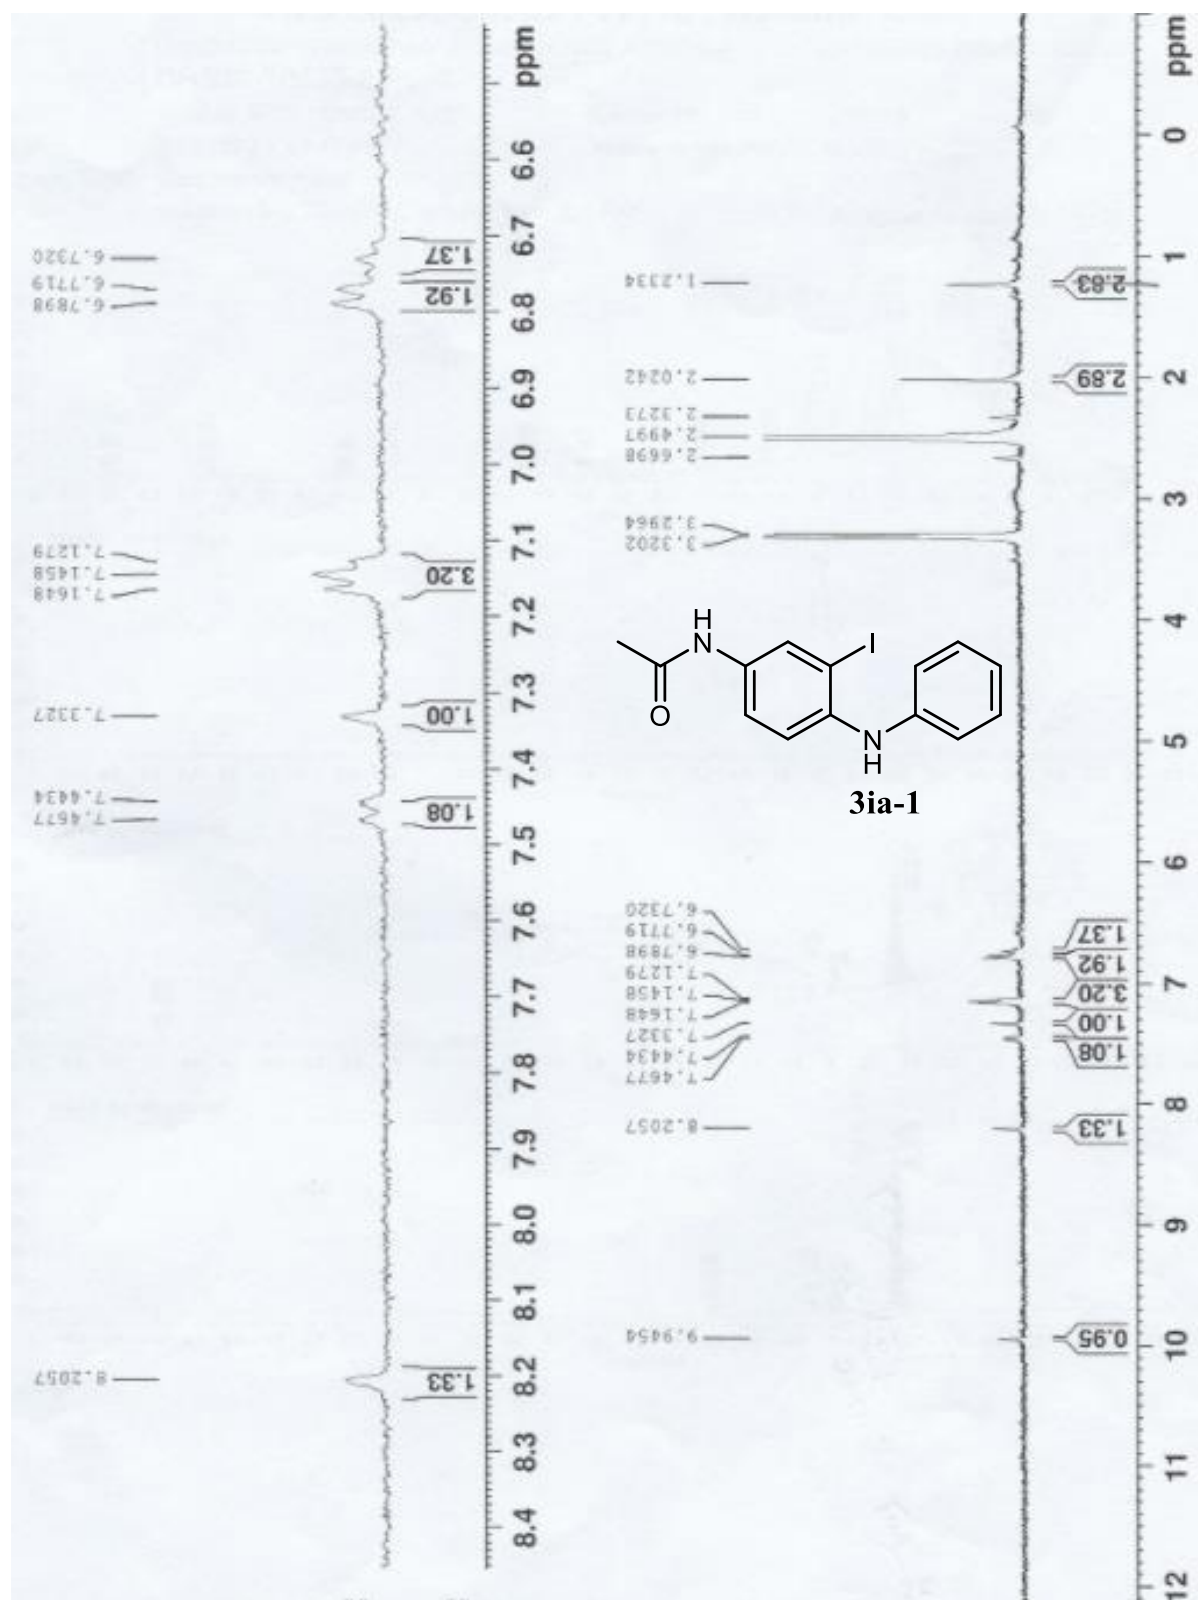

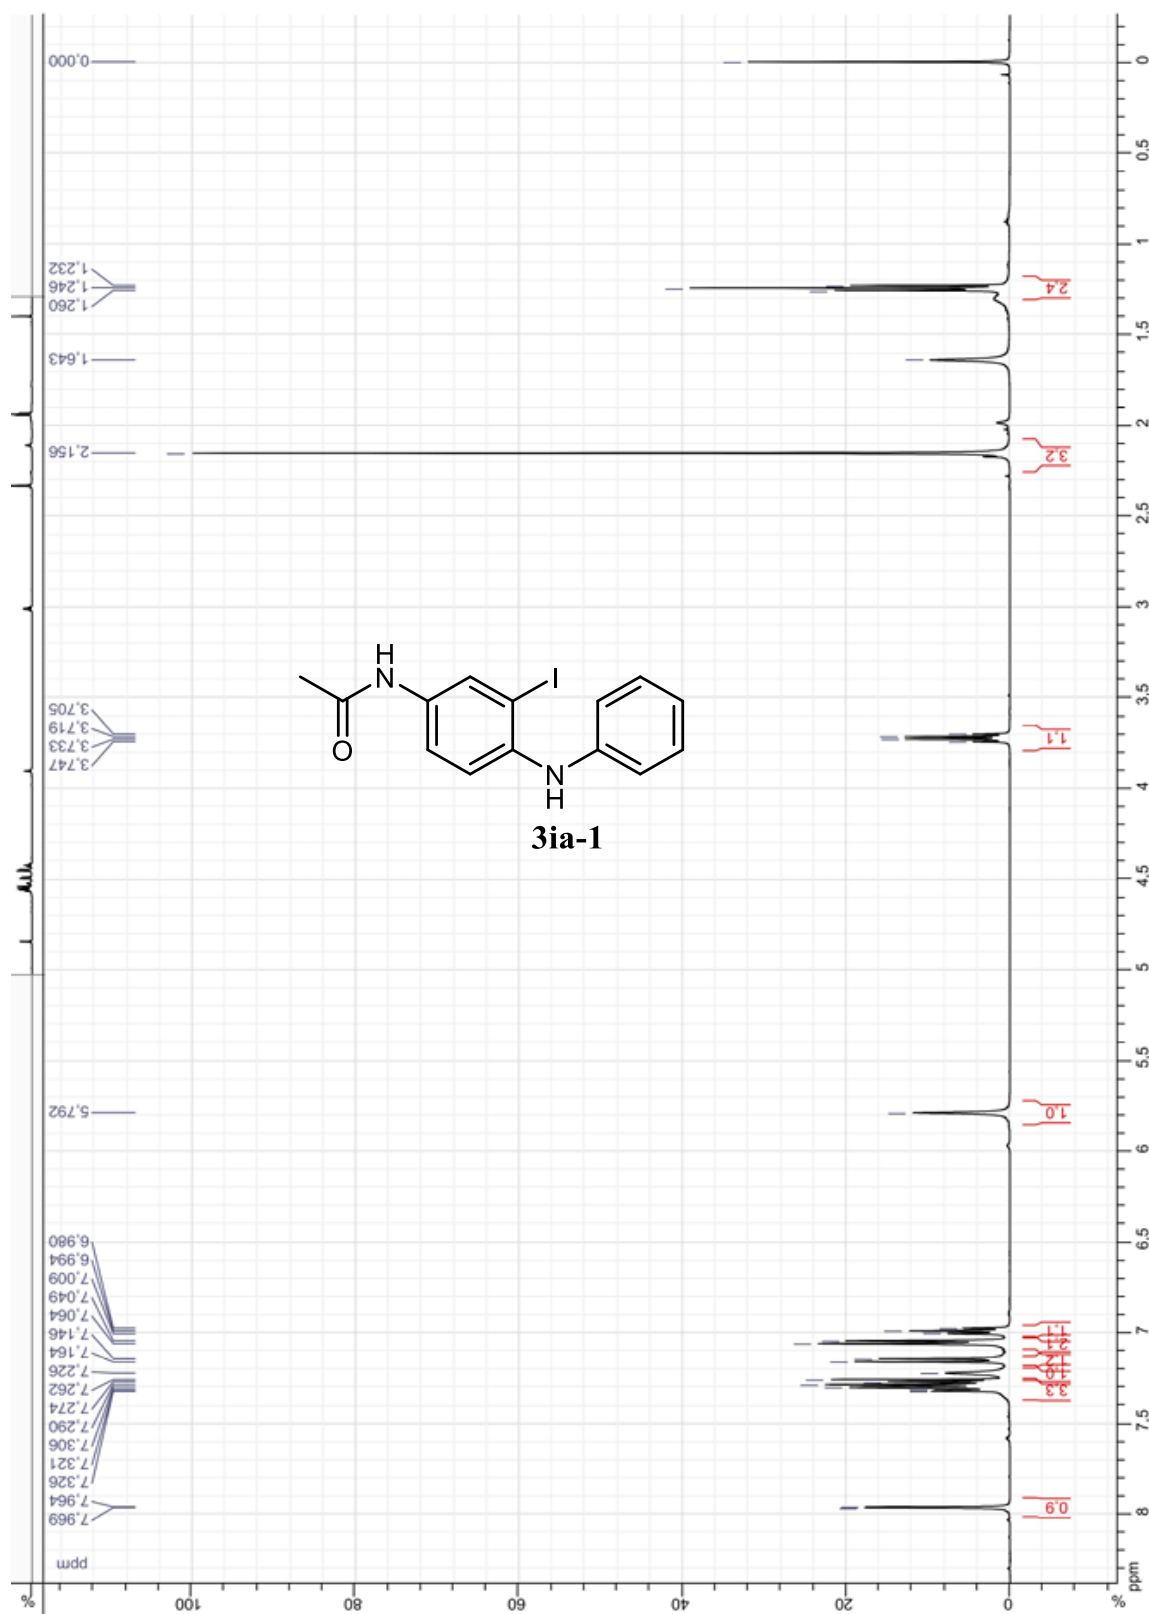

[Peaks at 1.25 (t) and 3.72 (q) are due to residual ethanol]

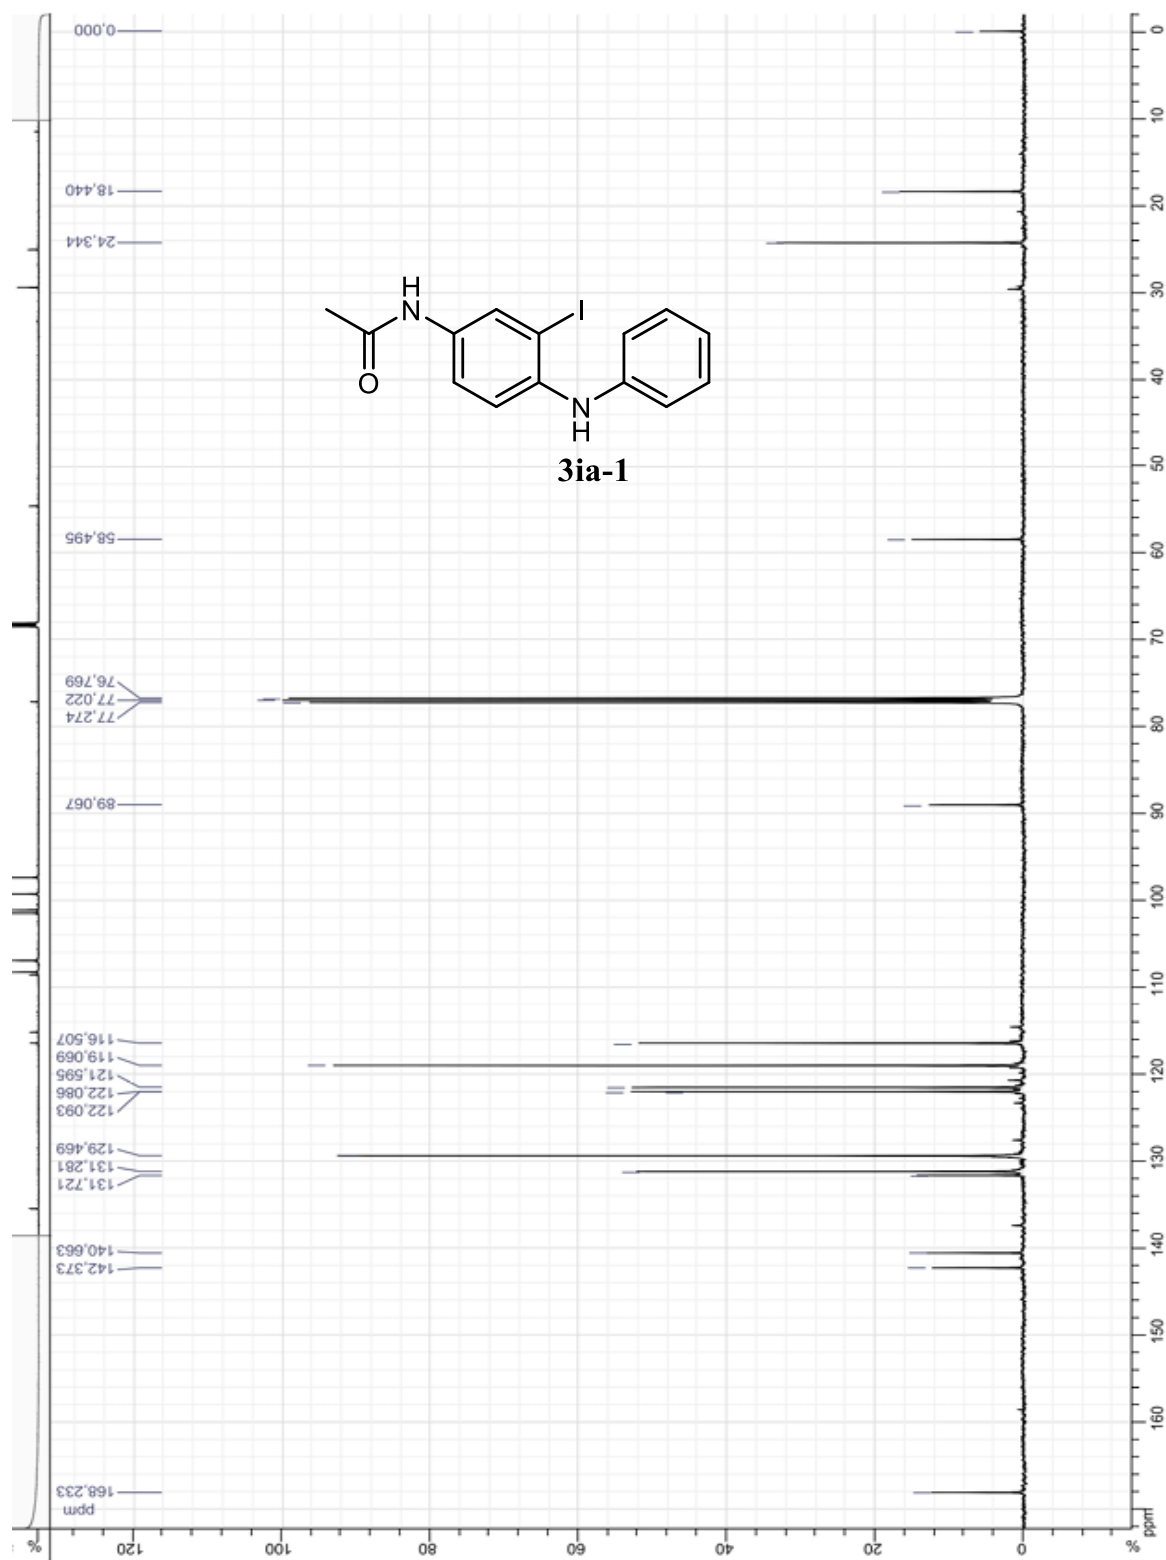

[Peaks at 18.4 and 58.4 are due to residual ethanol]

$^1\text{H}$  NMR spectrum of 2-iodo-*N*-methyl-*N*-phenylaniline (**3aa-1**) in  $\text{CDCl}_3$

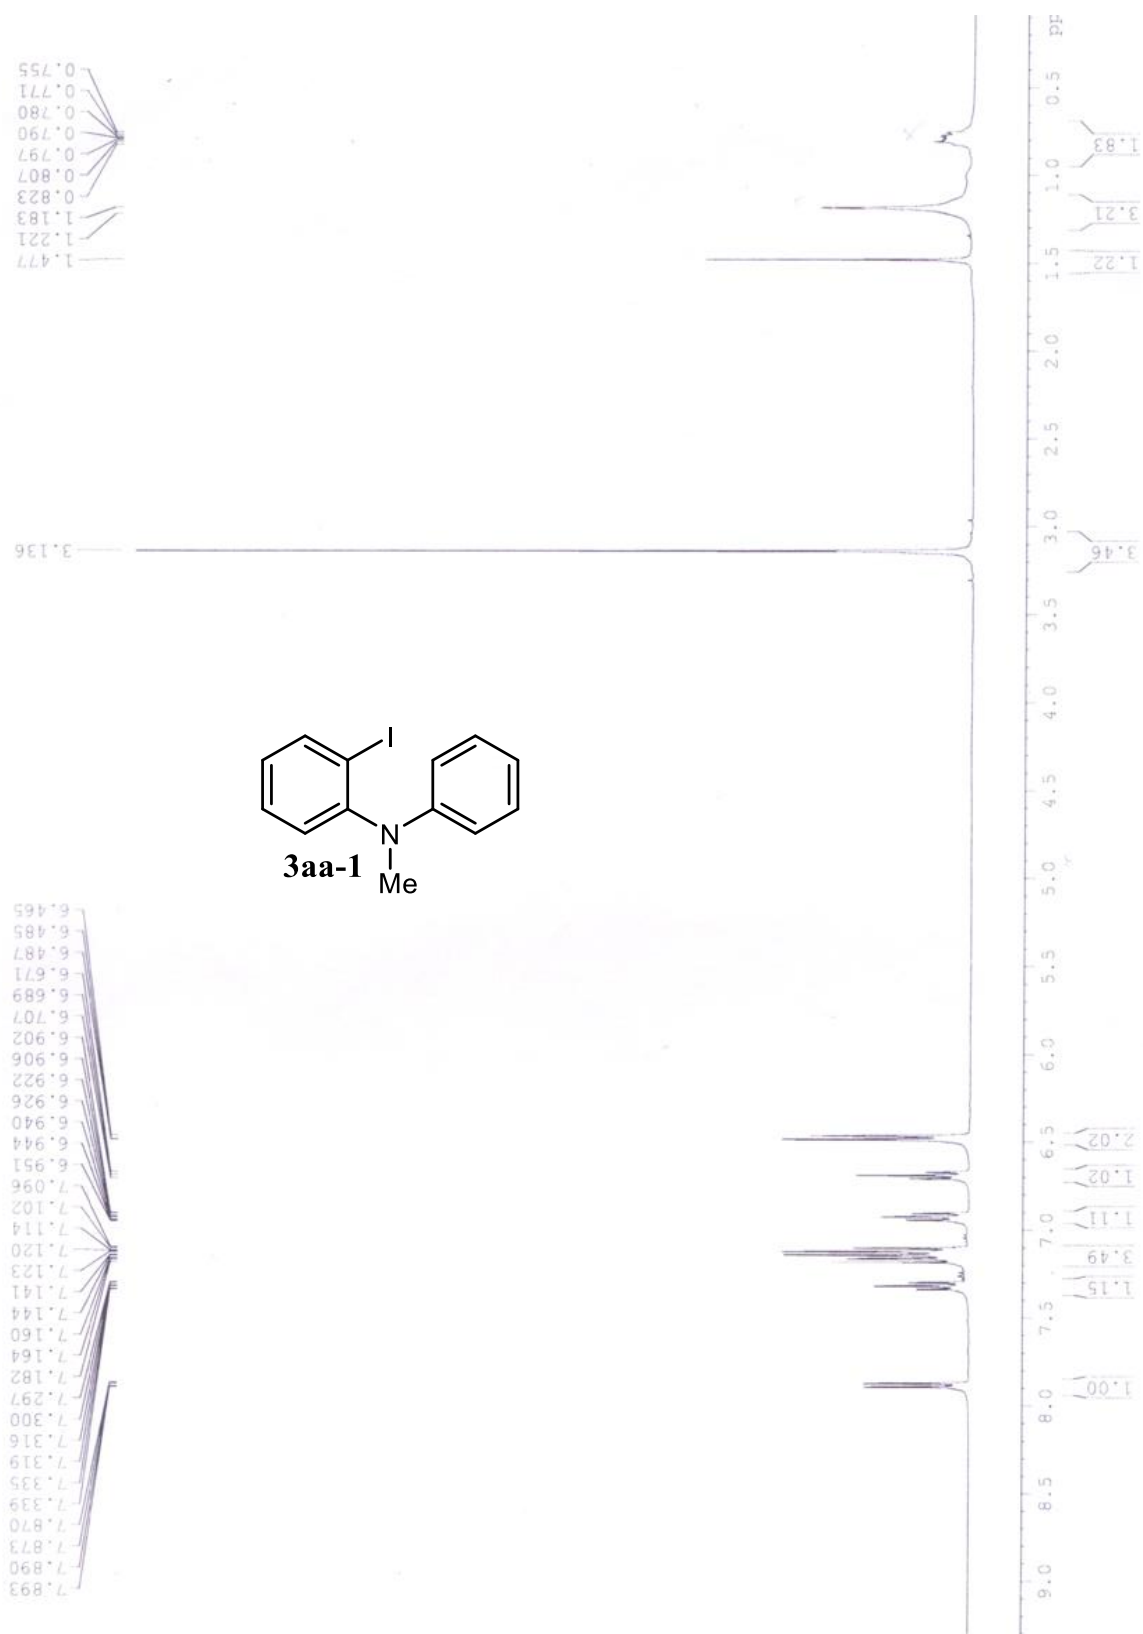

## 9.2 $^1\text{H}$ NMR and $^{13}\text{C}$ NMR spectra of carbazoles 4-1 to 4-43.

$^1\text{H}$  NMR and  $^{13}\text{C}$  NMR spectra of 9*H*-carbazole (**4-1**) in  $\text{CDCl}_3$

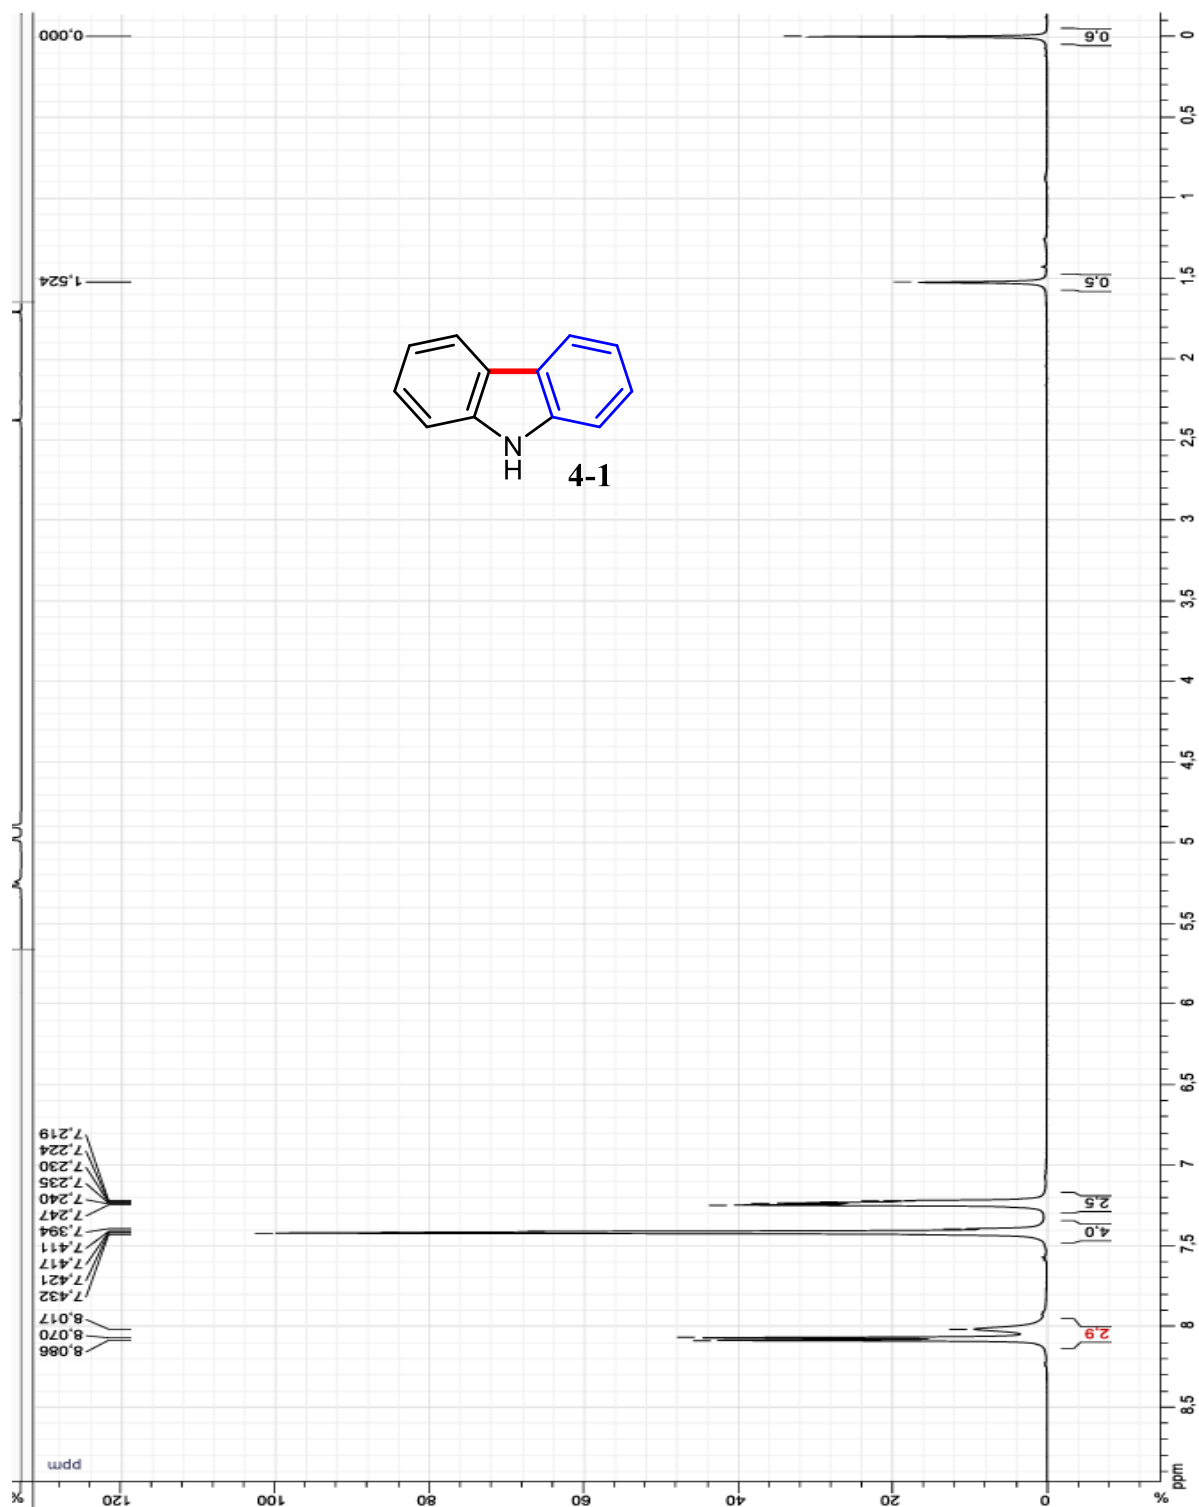

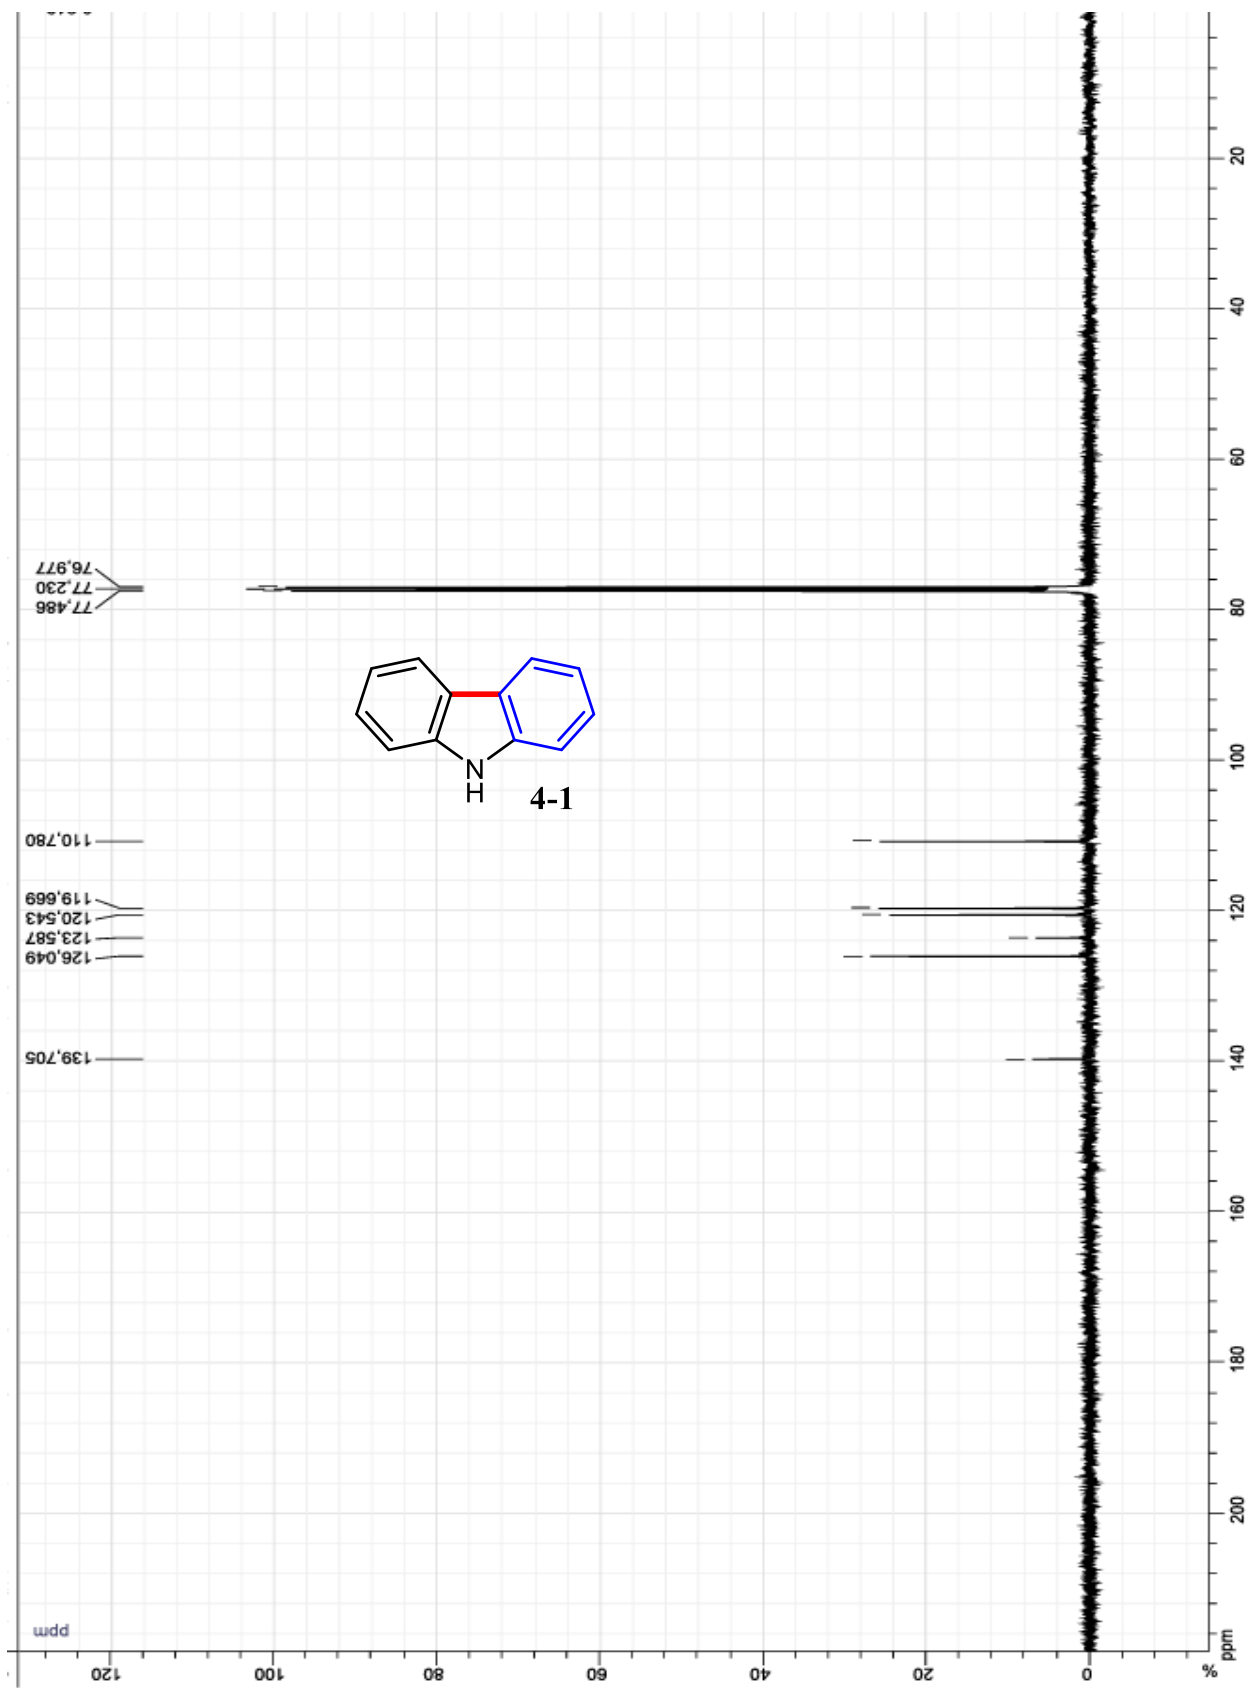



$^1\text{H}$  NMR and  $^{13}\text{C}$  NMR spectra of 3-methyl-9*H*-carbazole (**4-2**) in  $\text{CDCl}_3$

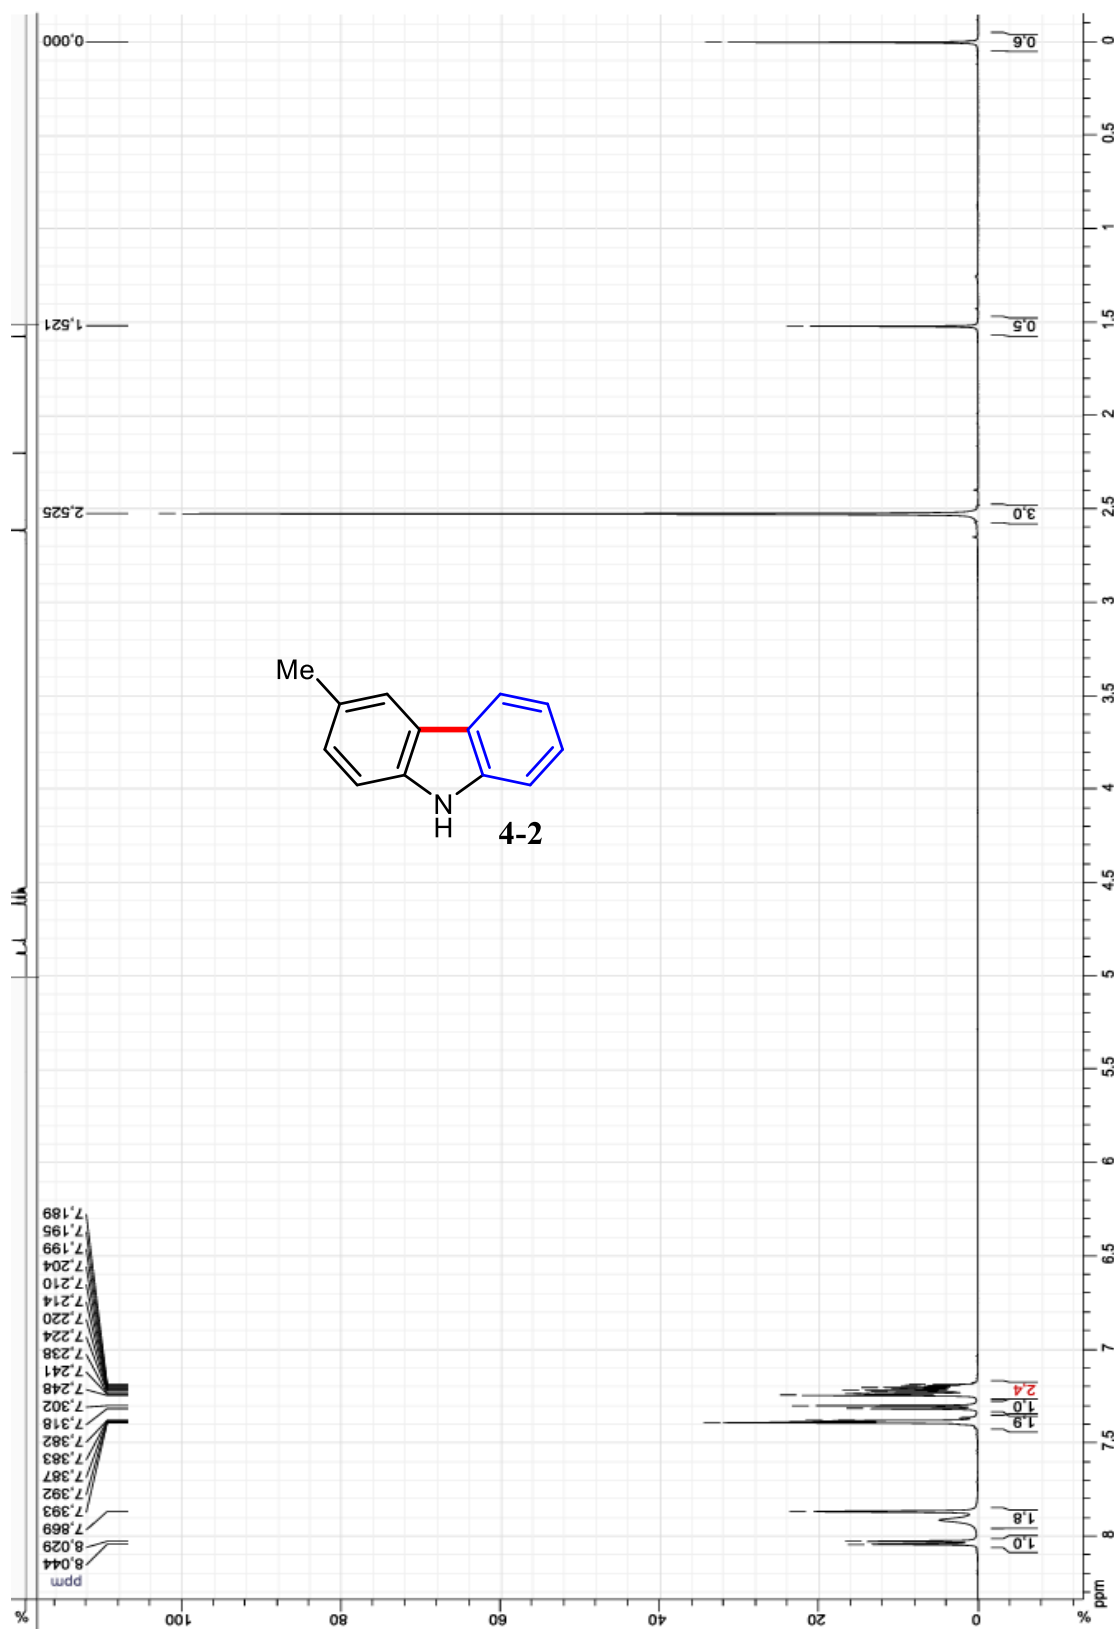

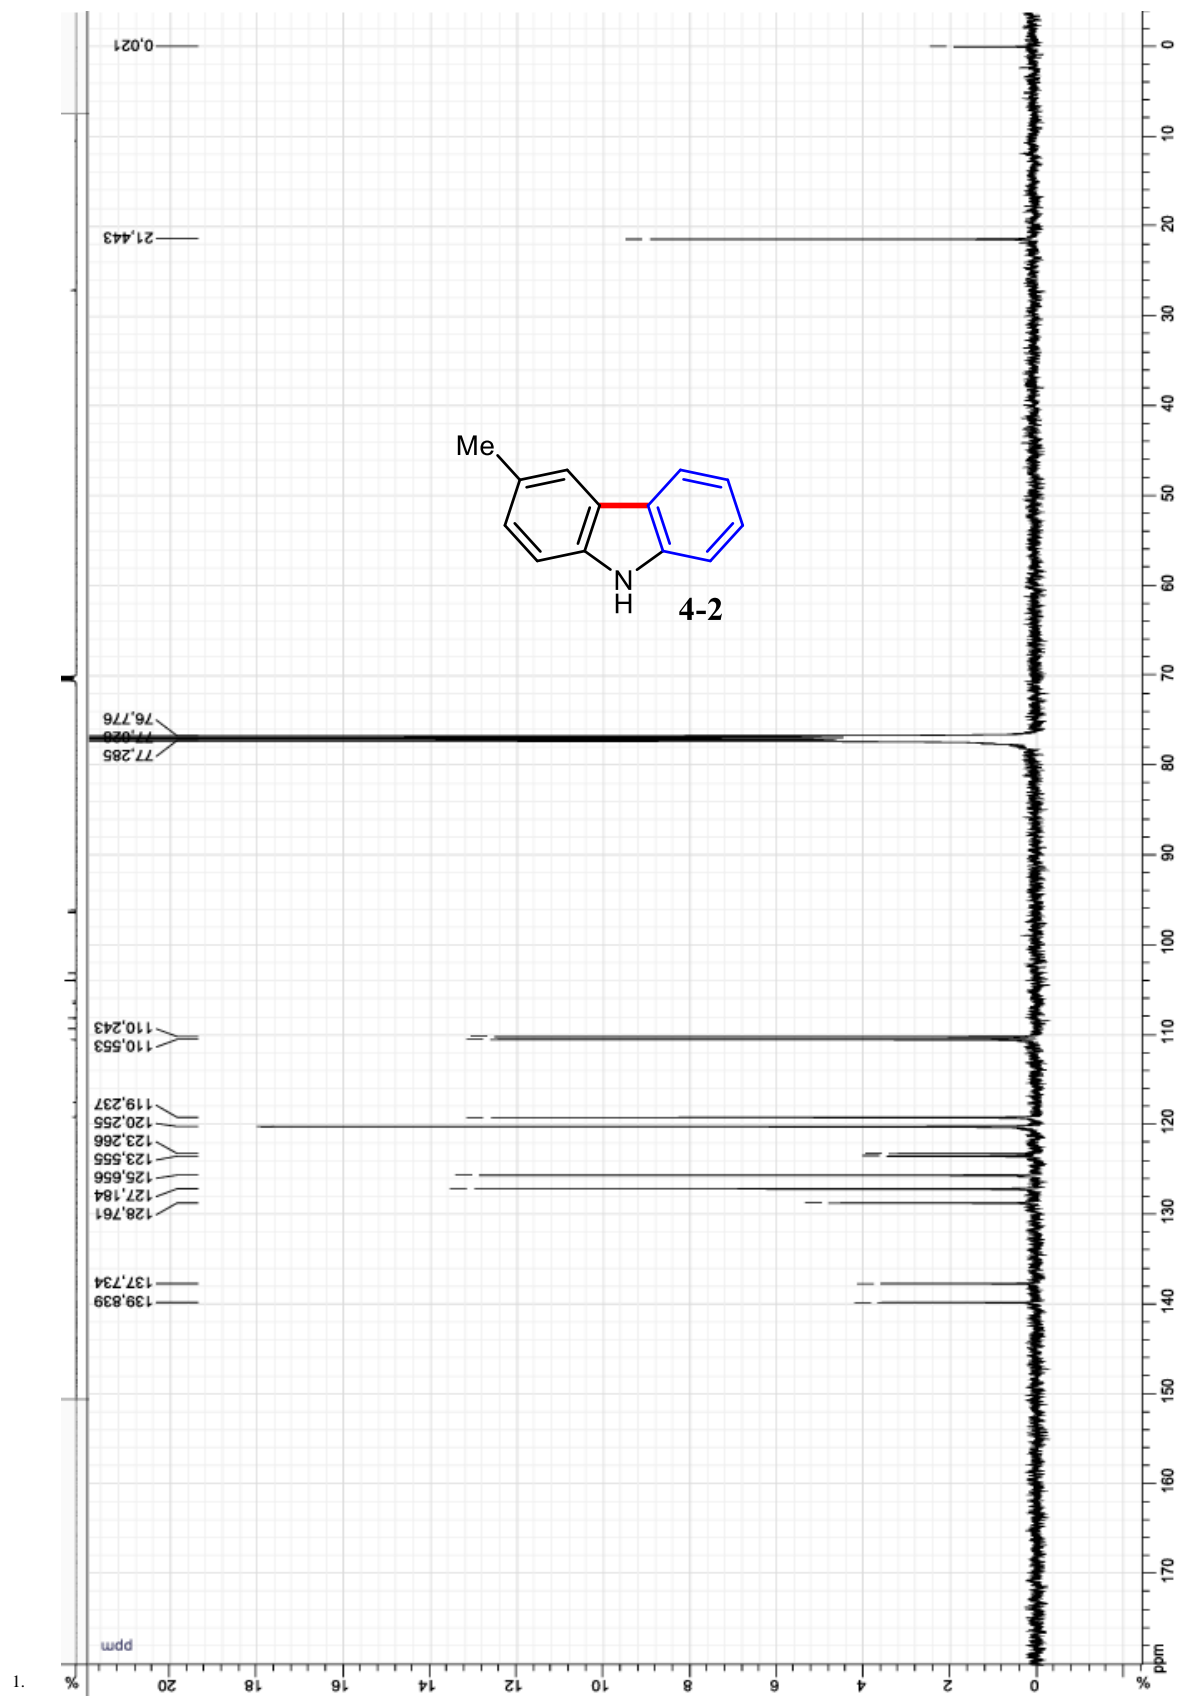

<sup>1</sup>H NMR and <sup>13</sup>C NMR spectra of 3-(*tert*-butyl)-9*H*-carbazole (**4-3**) in CDCl<sub>3</sub>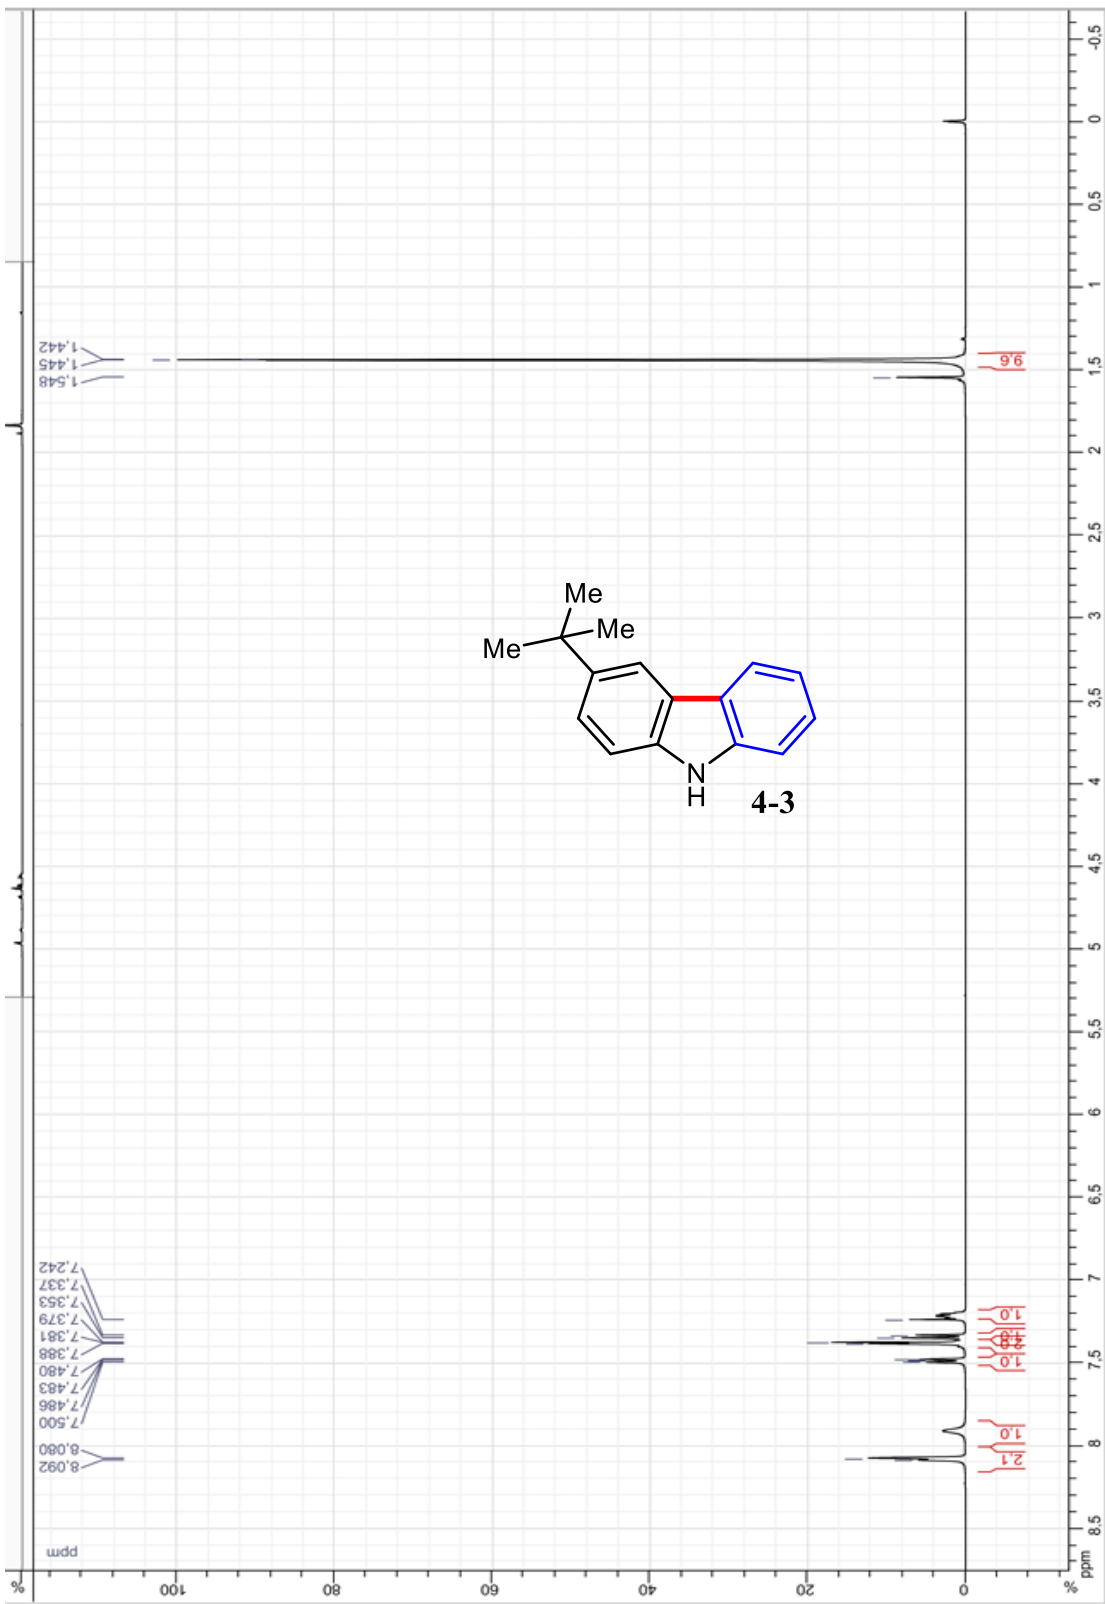

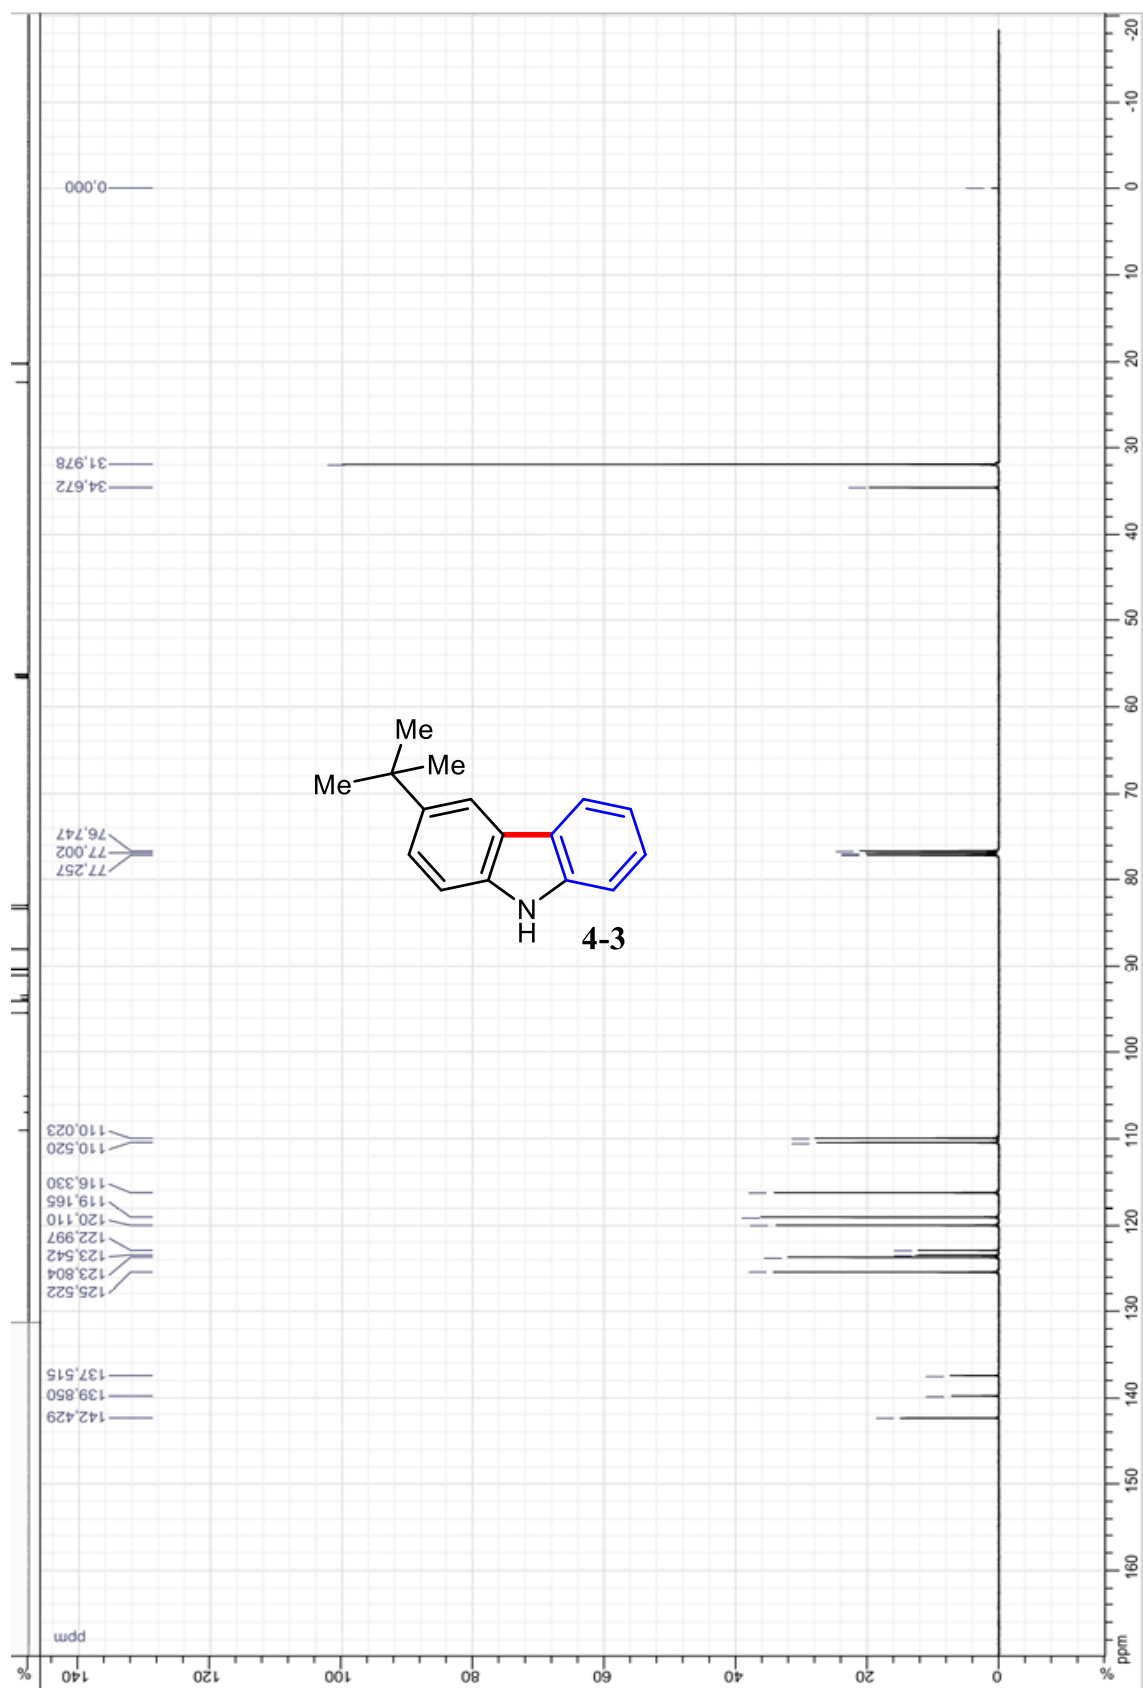

$^1\text{H}$  NMR and  $^{13}\text{C}$  NMR spectra of 3-(trifluoromethyl)-9*H*-carbazole (**4-4**) in  $\text{CDCl}_3$

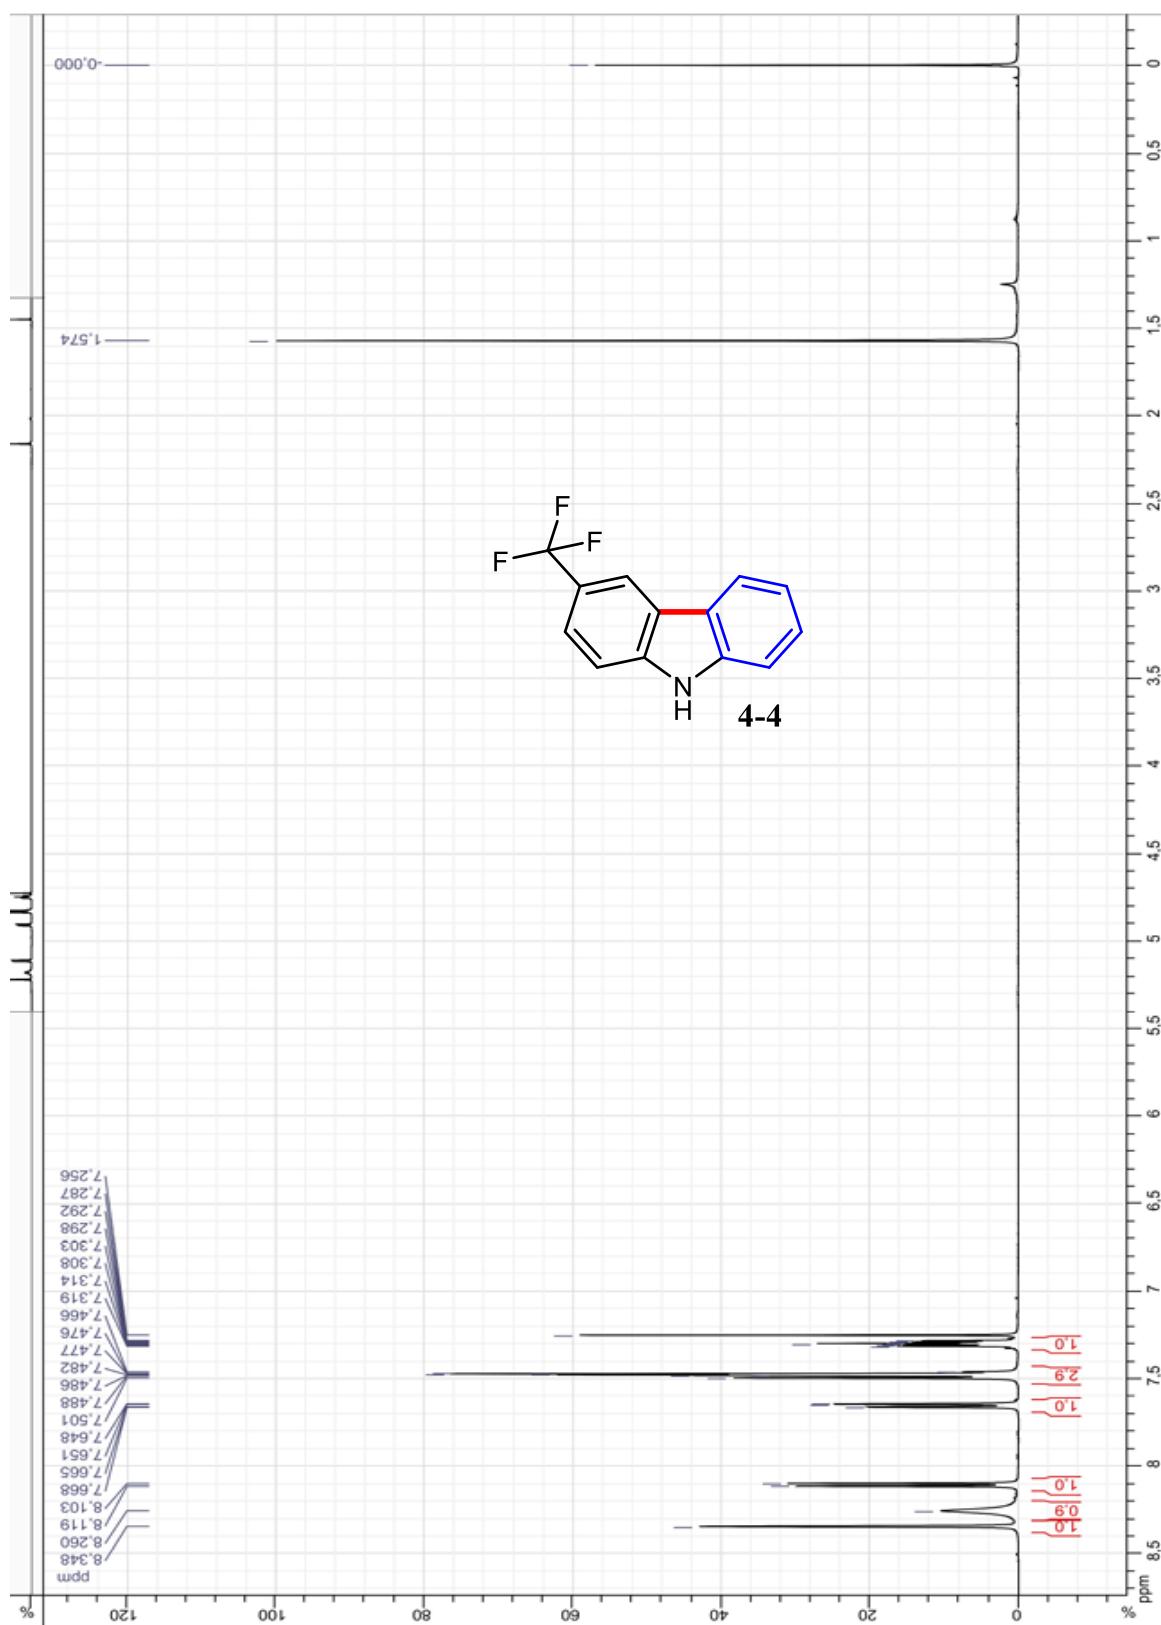

1.

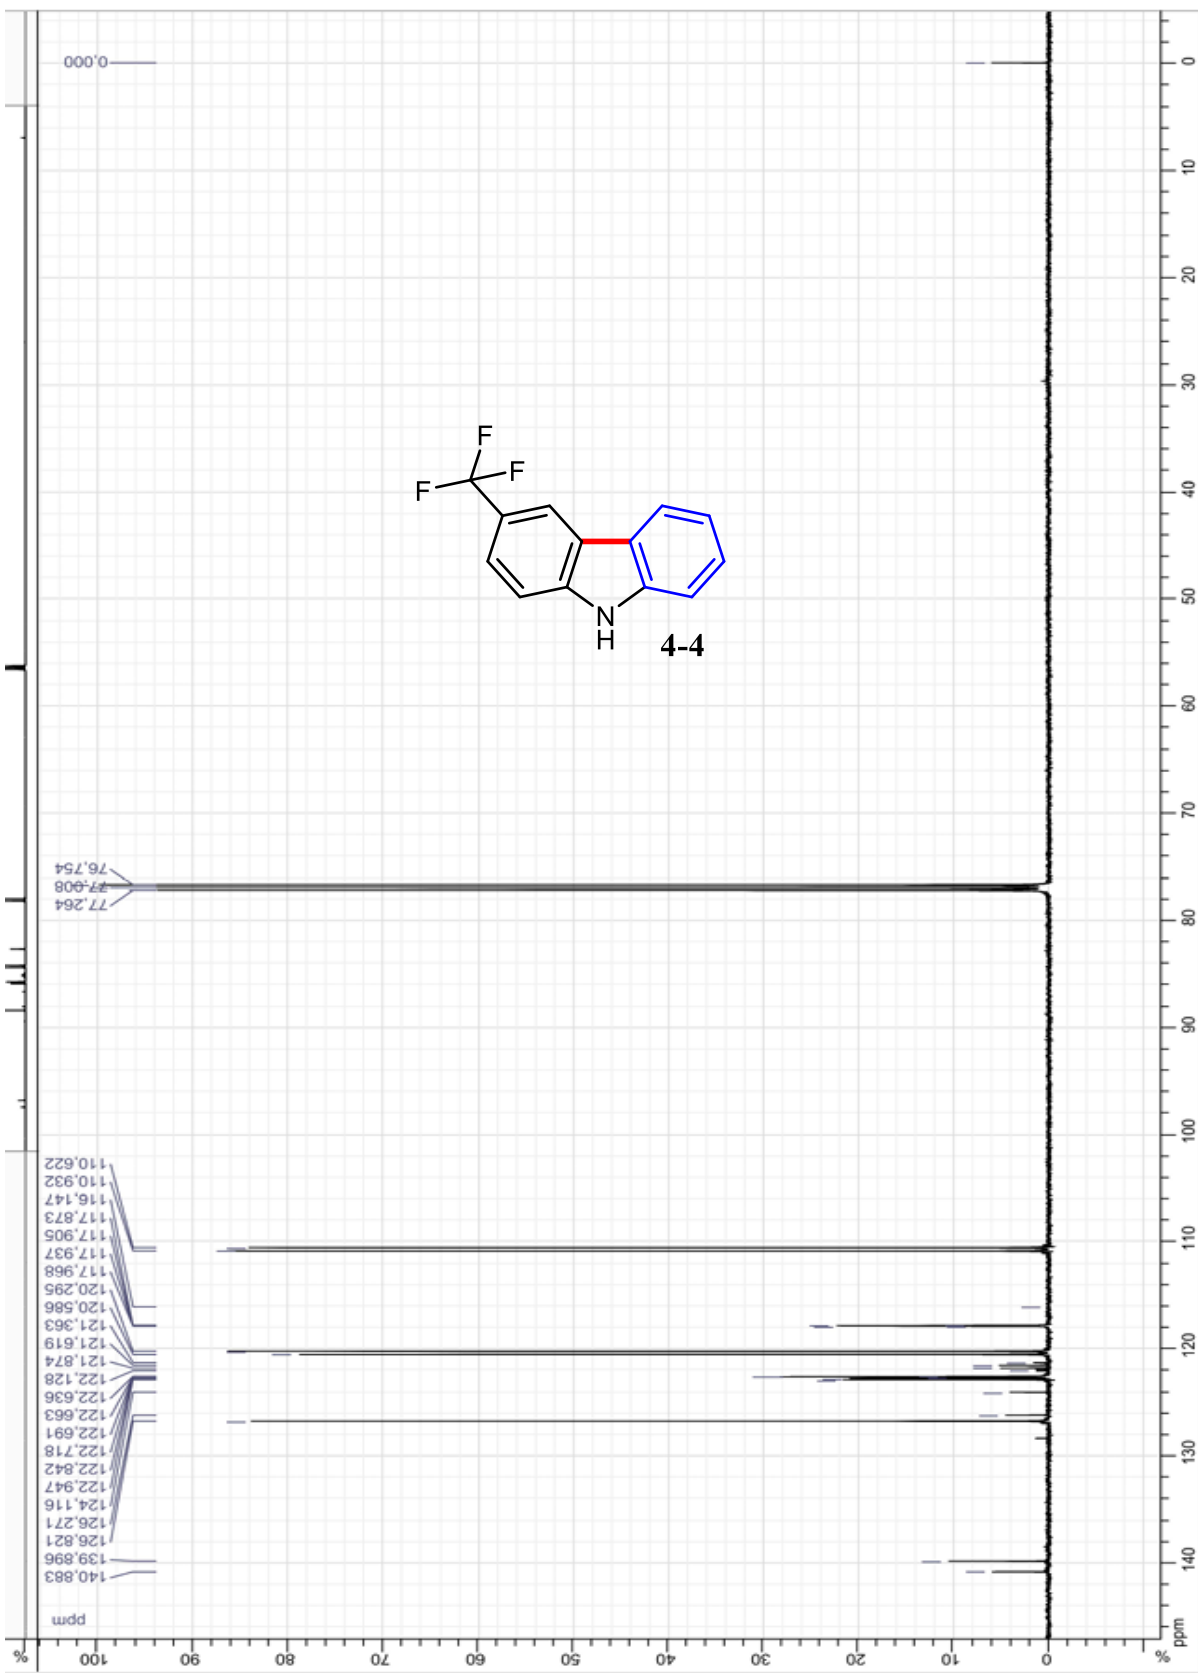

<sup>1</sup>H NMR and <sup>13</sup>C NMR spectra of 3-fluoro-9*H*-carbazole (**4-5**) in CDCl<sub>3</sub>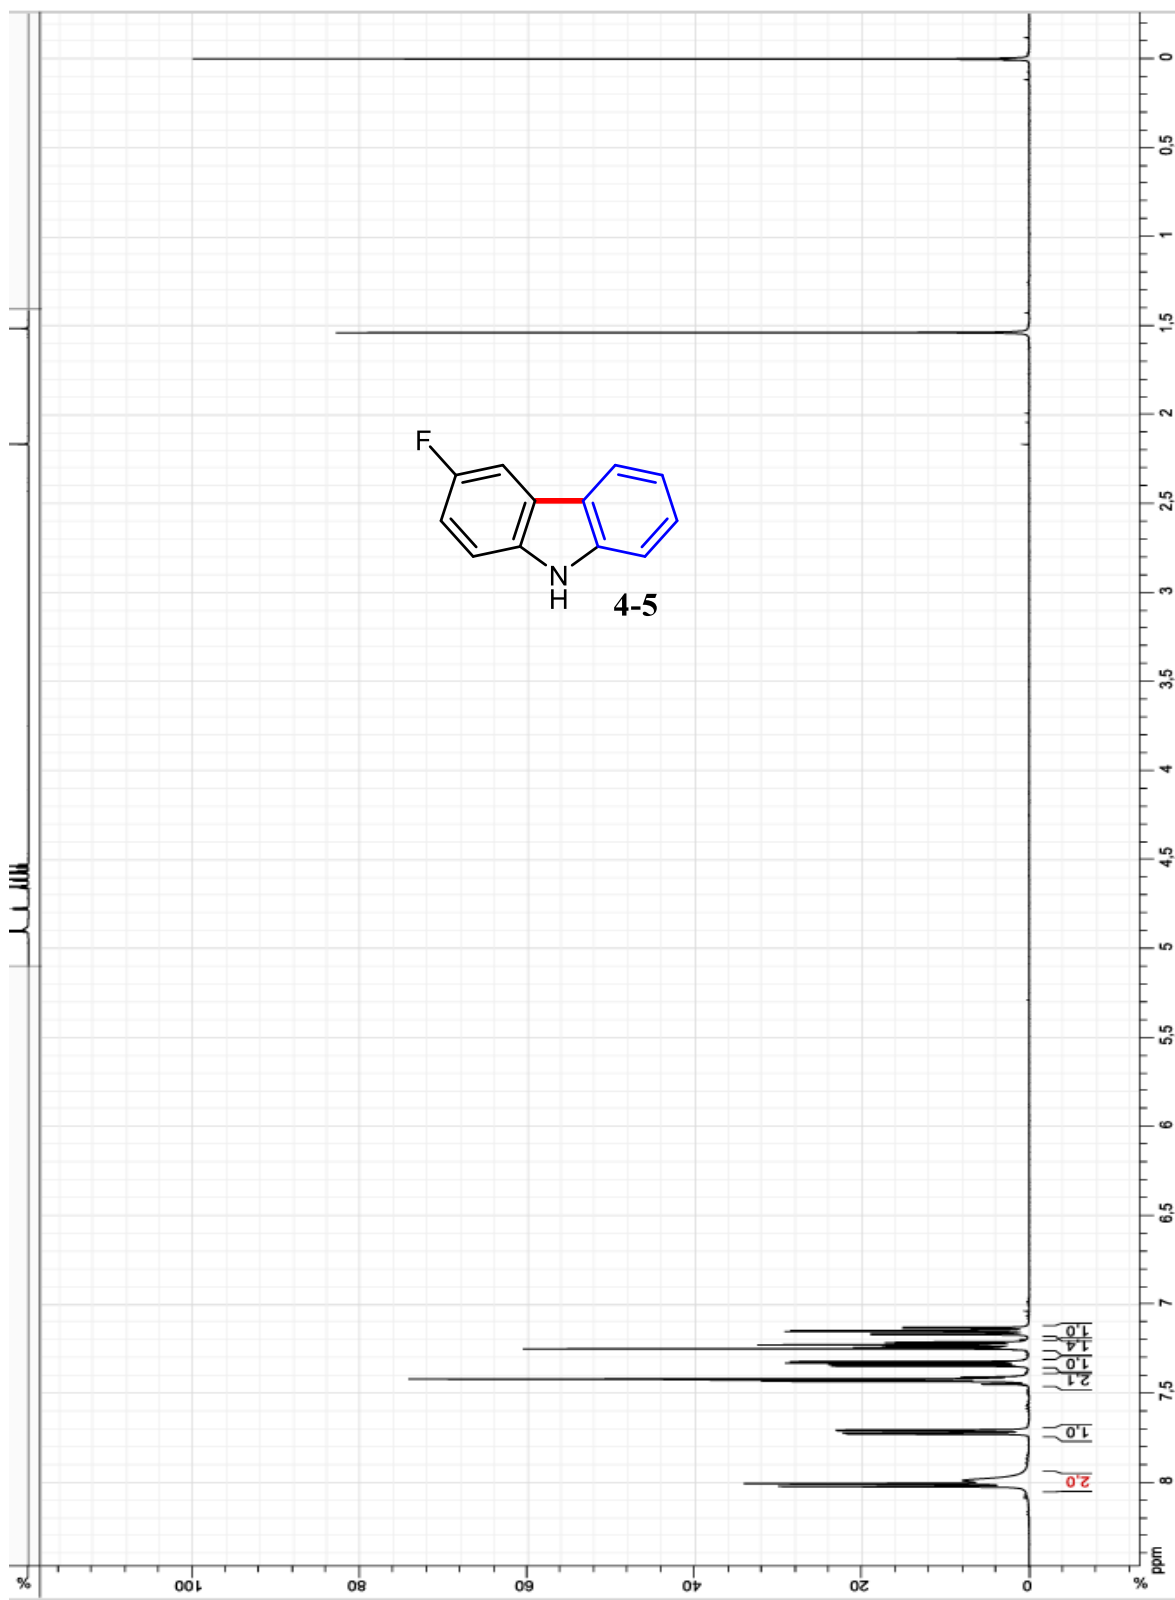

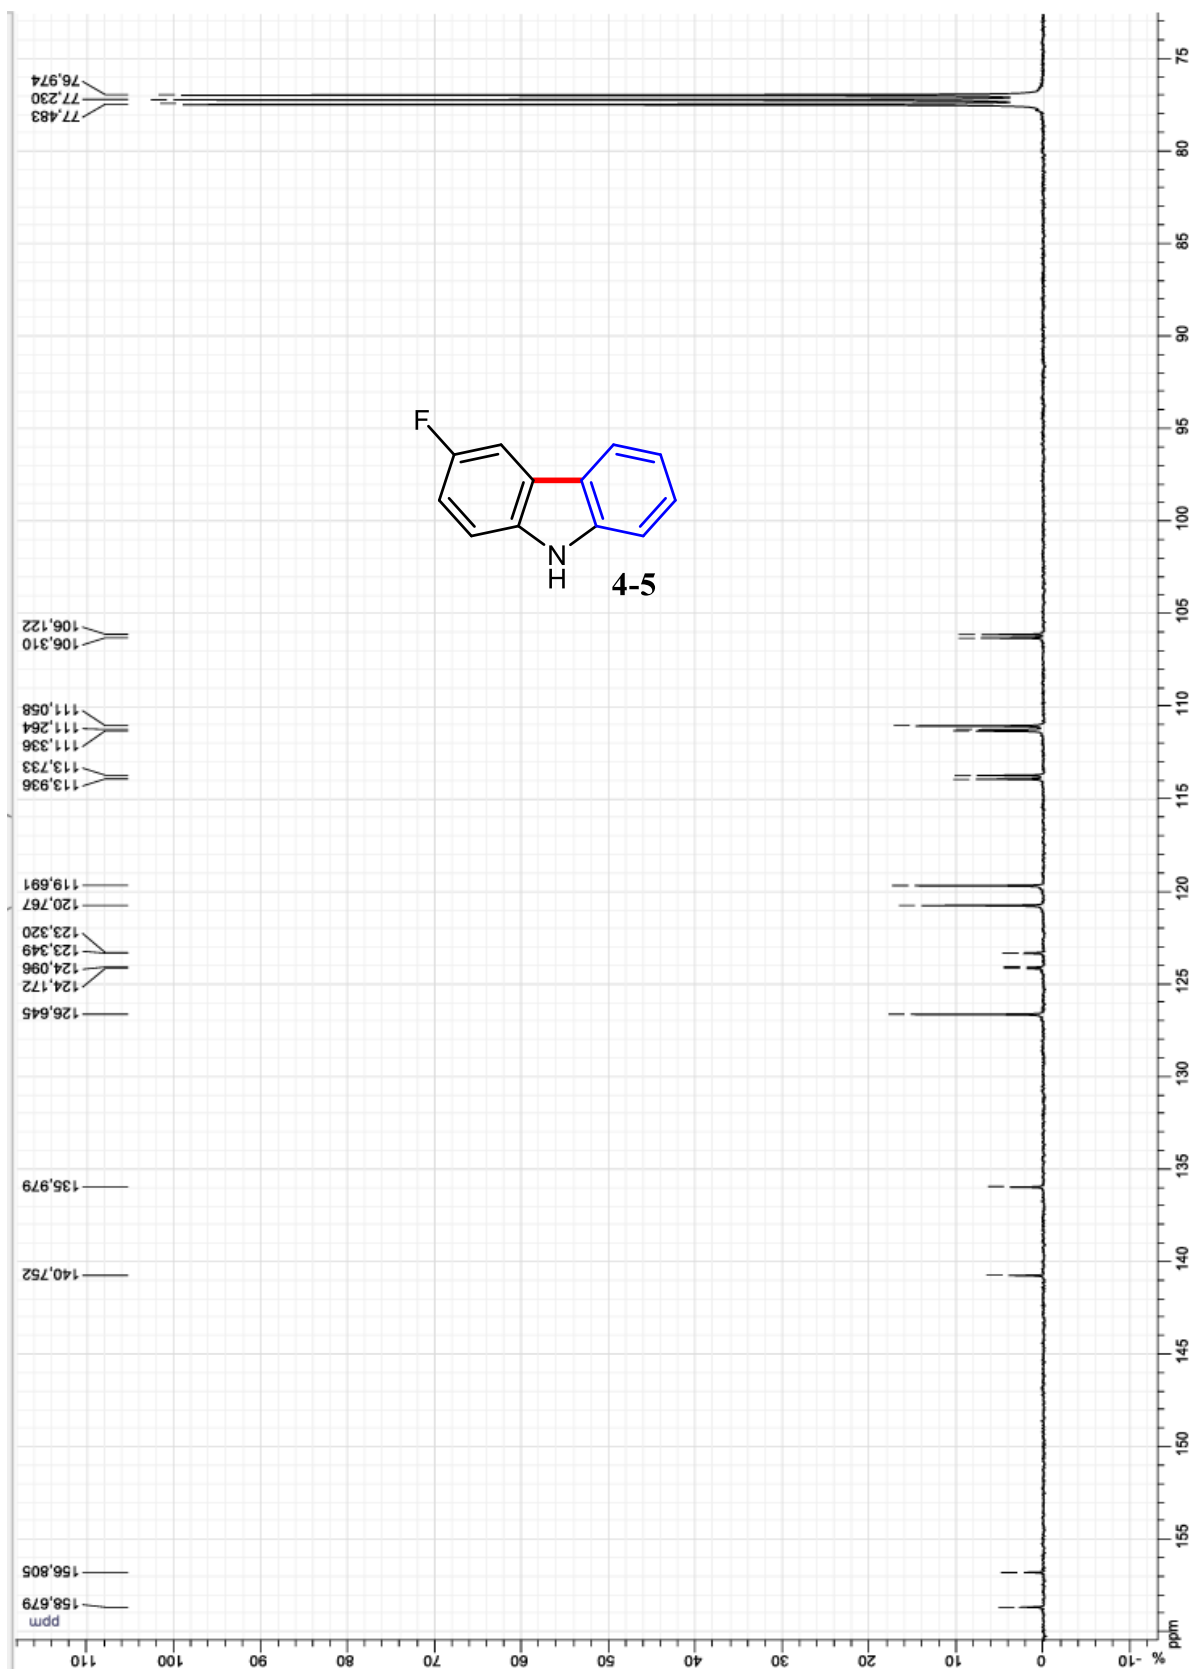



$^1\text{H}$  NMR and  $^{13}\text{C}$  NMR spectra of 3-chloro-9*H*-carbazole (**4-6**) in MeOD

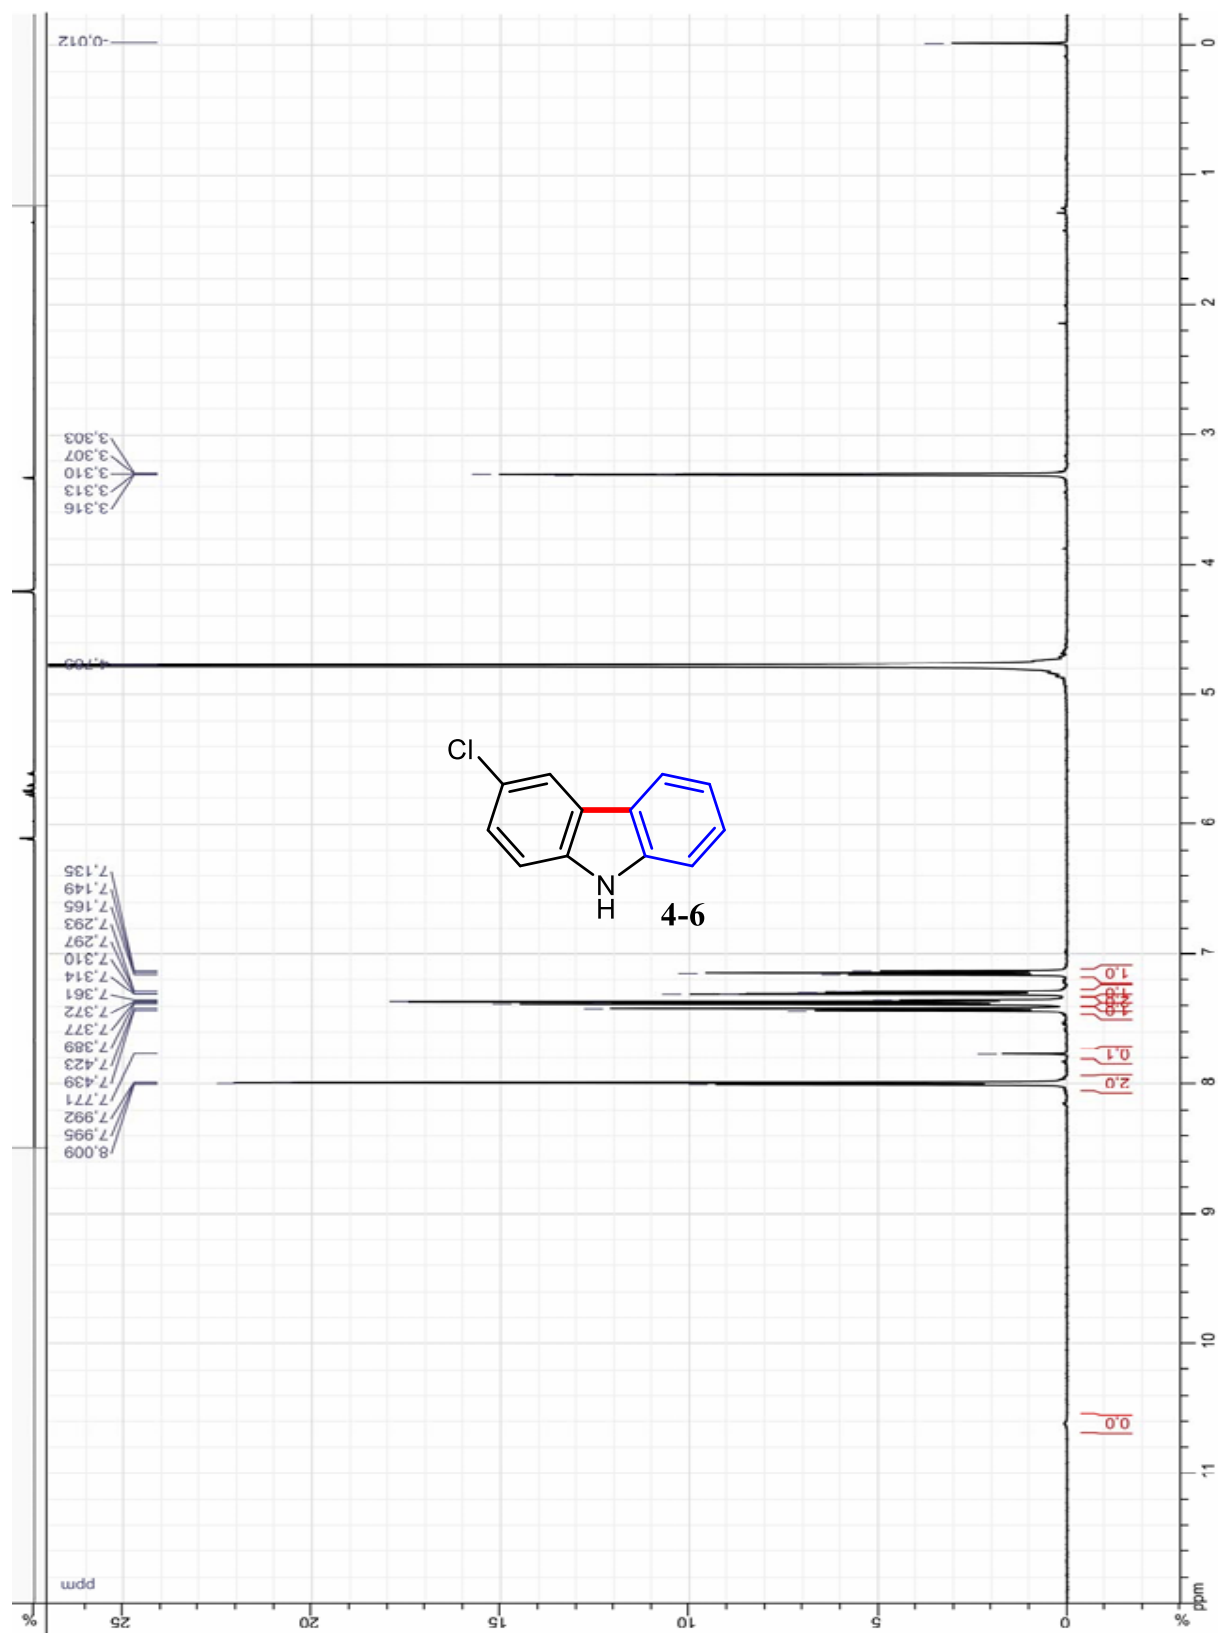

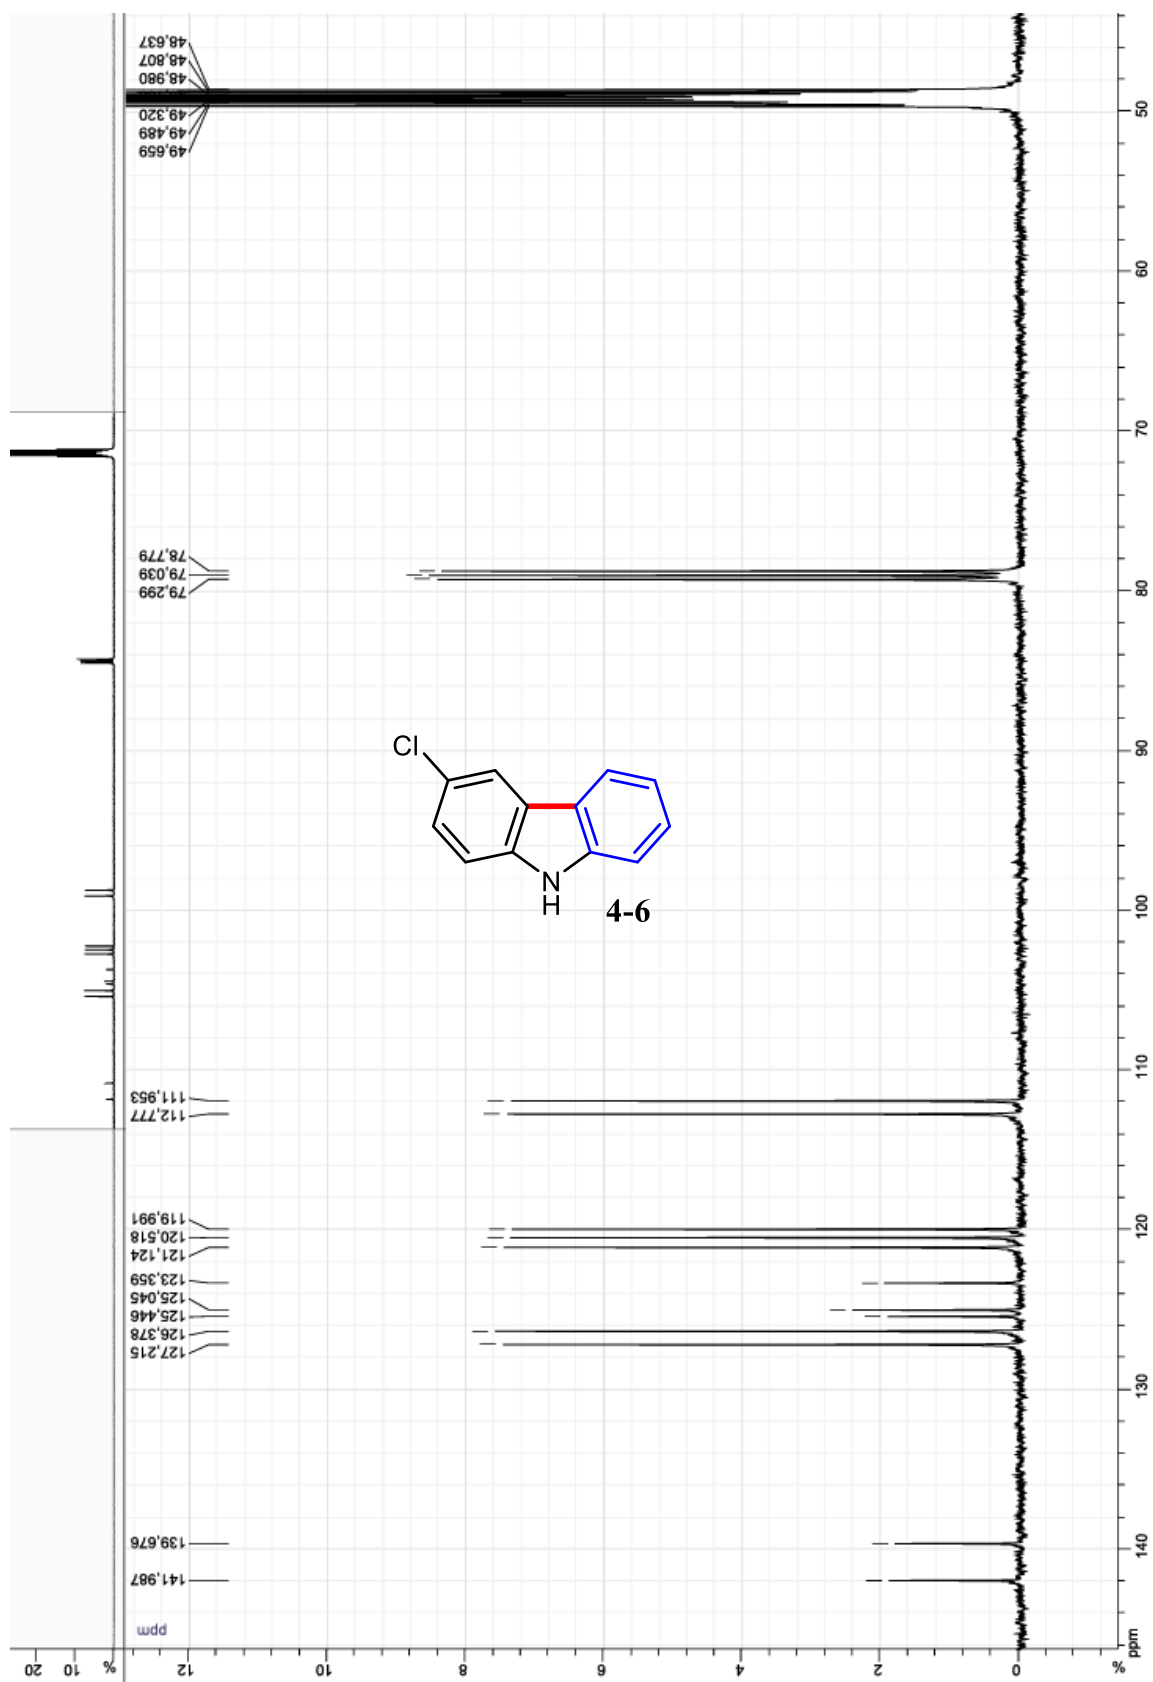

$^1\text{H}$  NMR and  $^{13}\text{C}$  NMR spectra of 3-bromo-9*H*-carbazole (**4-7**) in Acetone- $\text{D}_6$

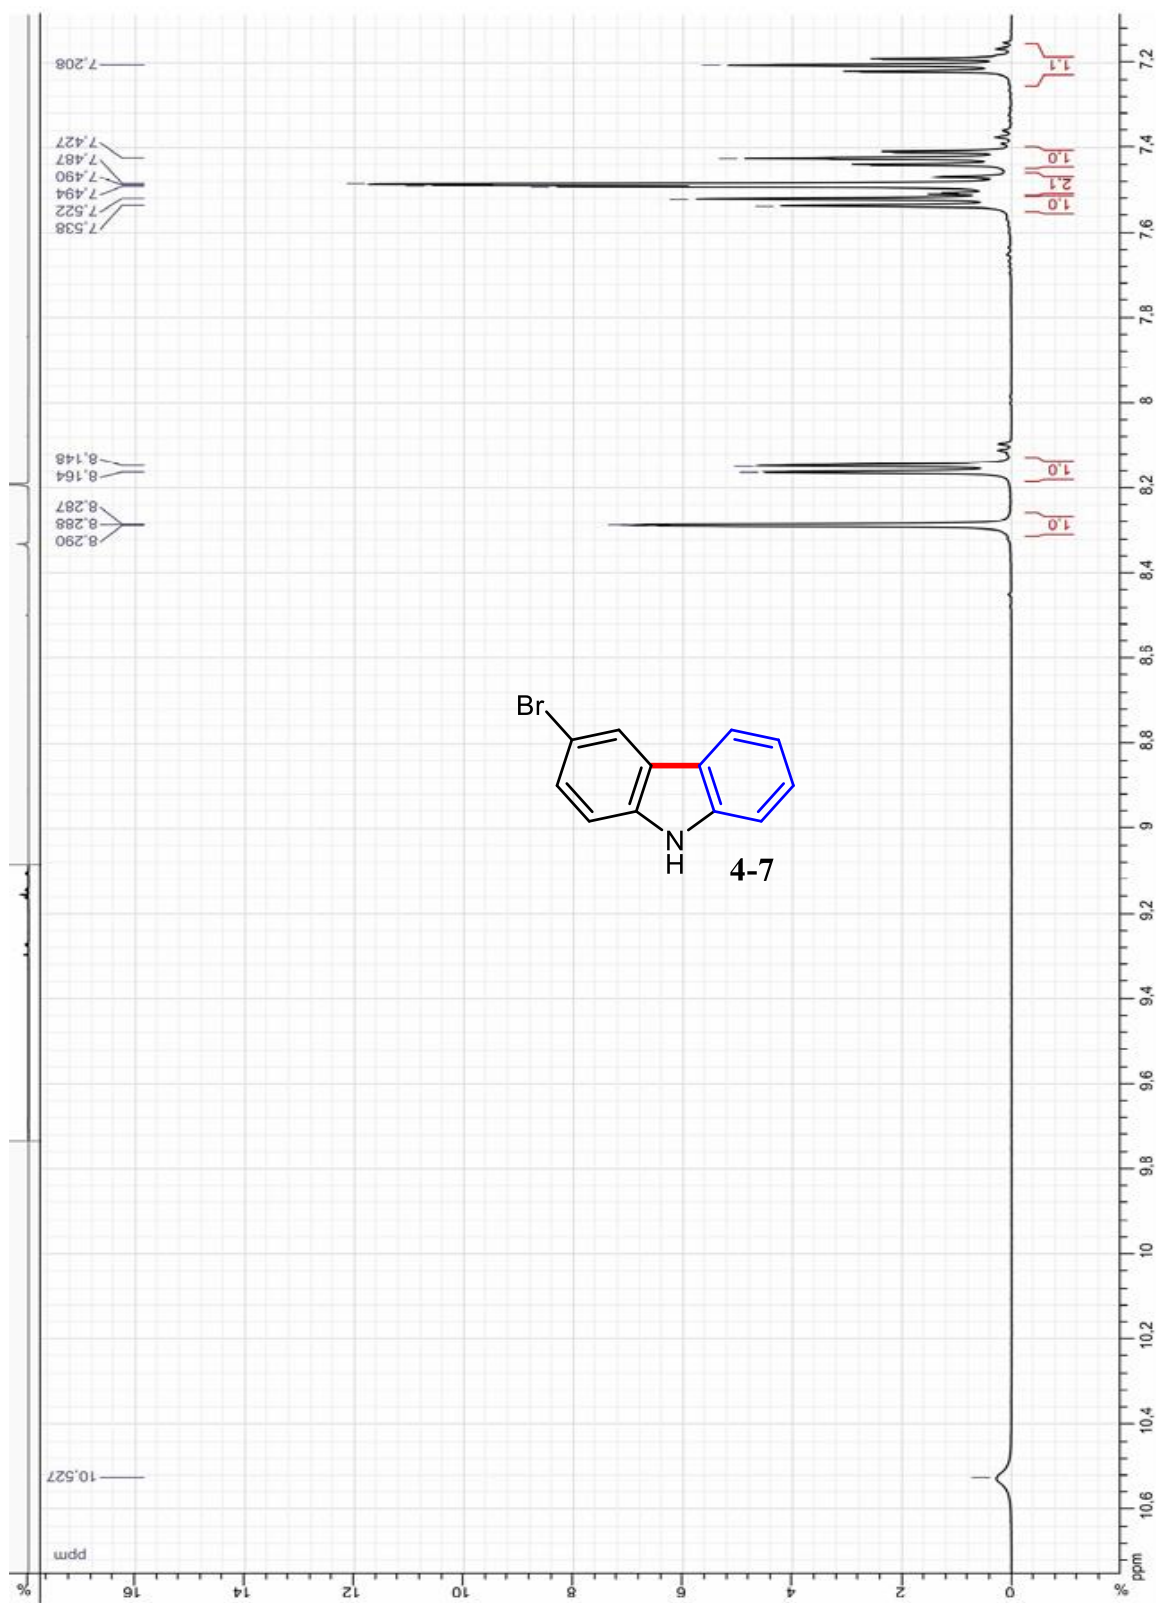

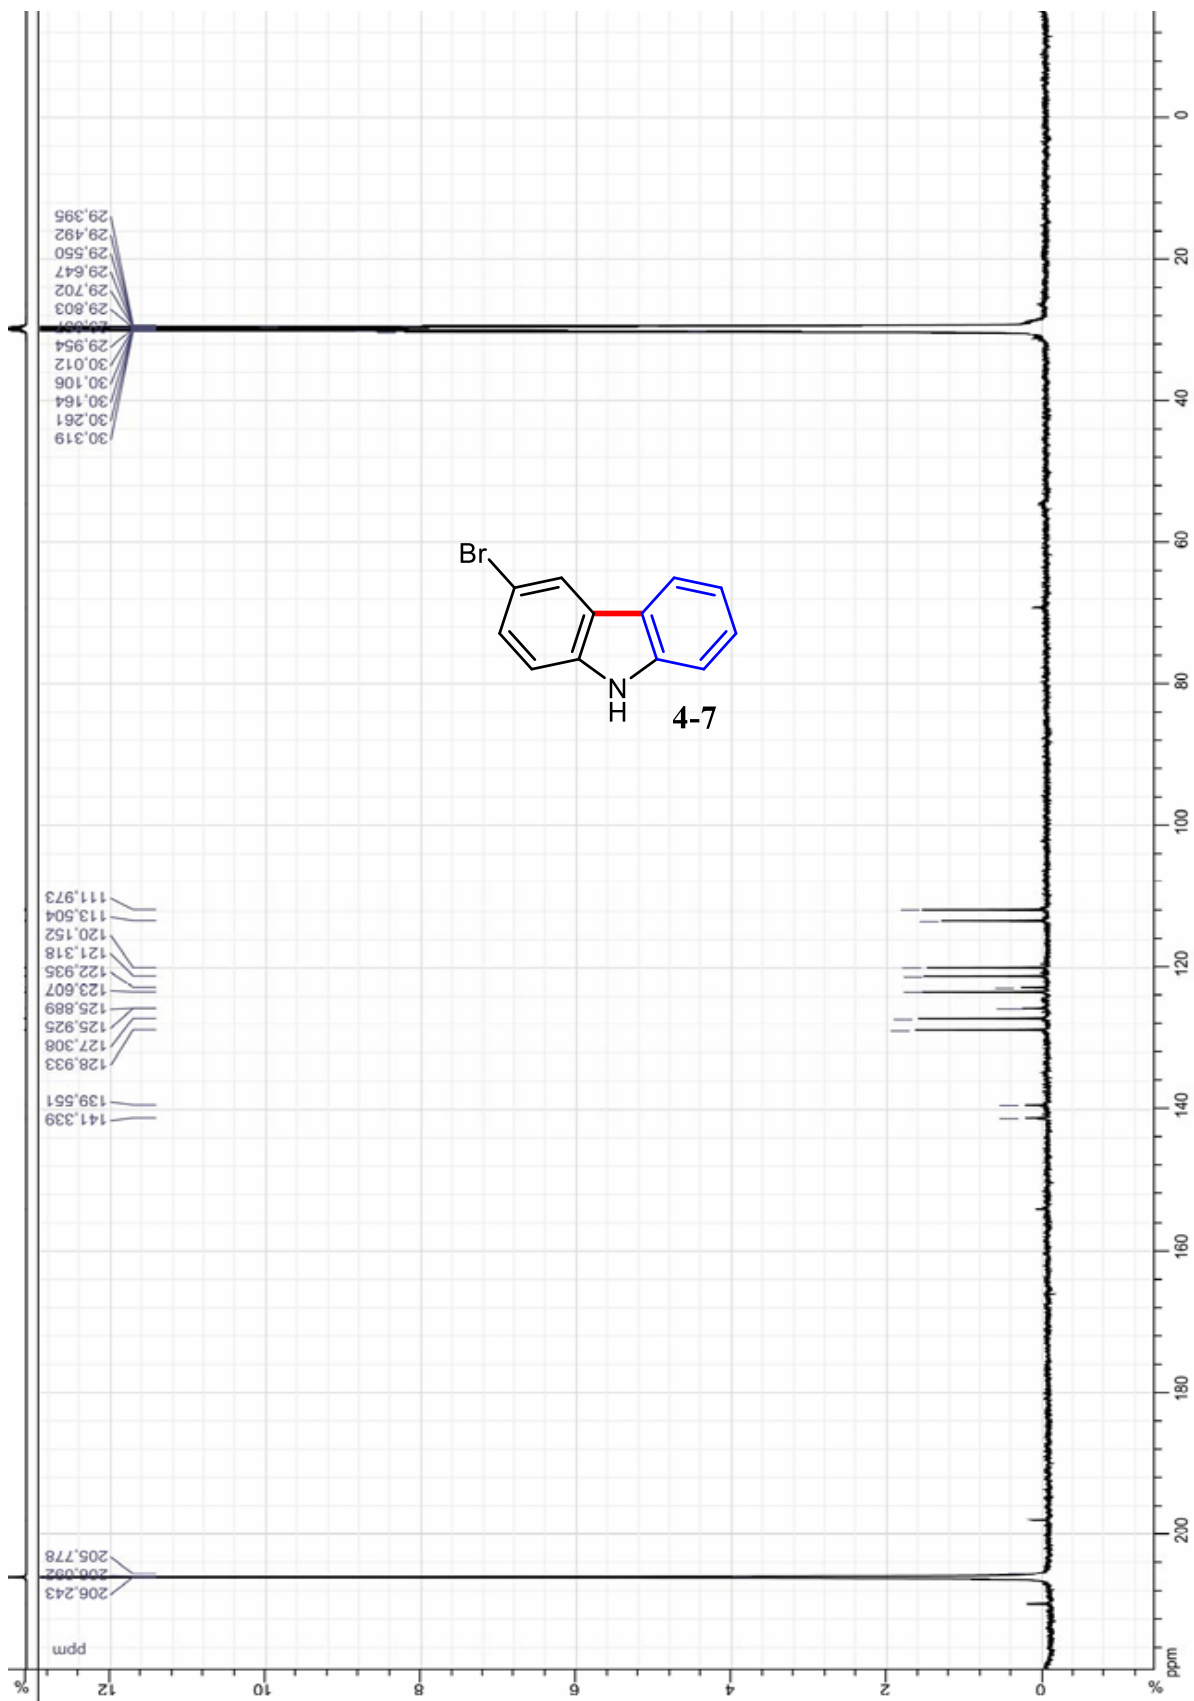

$^1\text{H}$  NMR and  $^{13}\text{C}$  NMR spectra of methyl 9*H*-carbazole-3-carboxylate (**4-8**) in Acetone- $\text{D}_6$

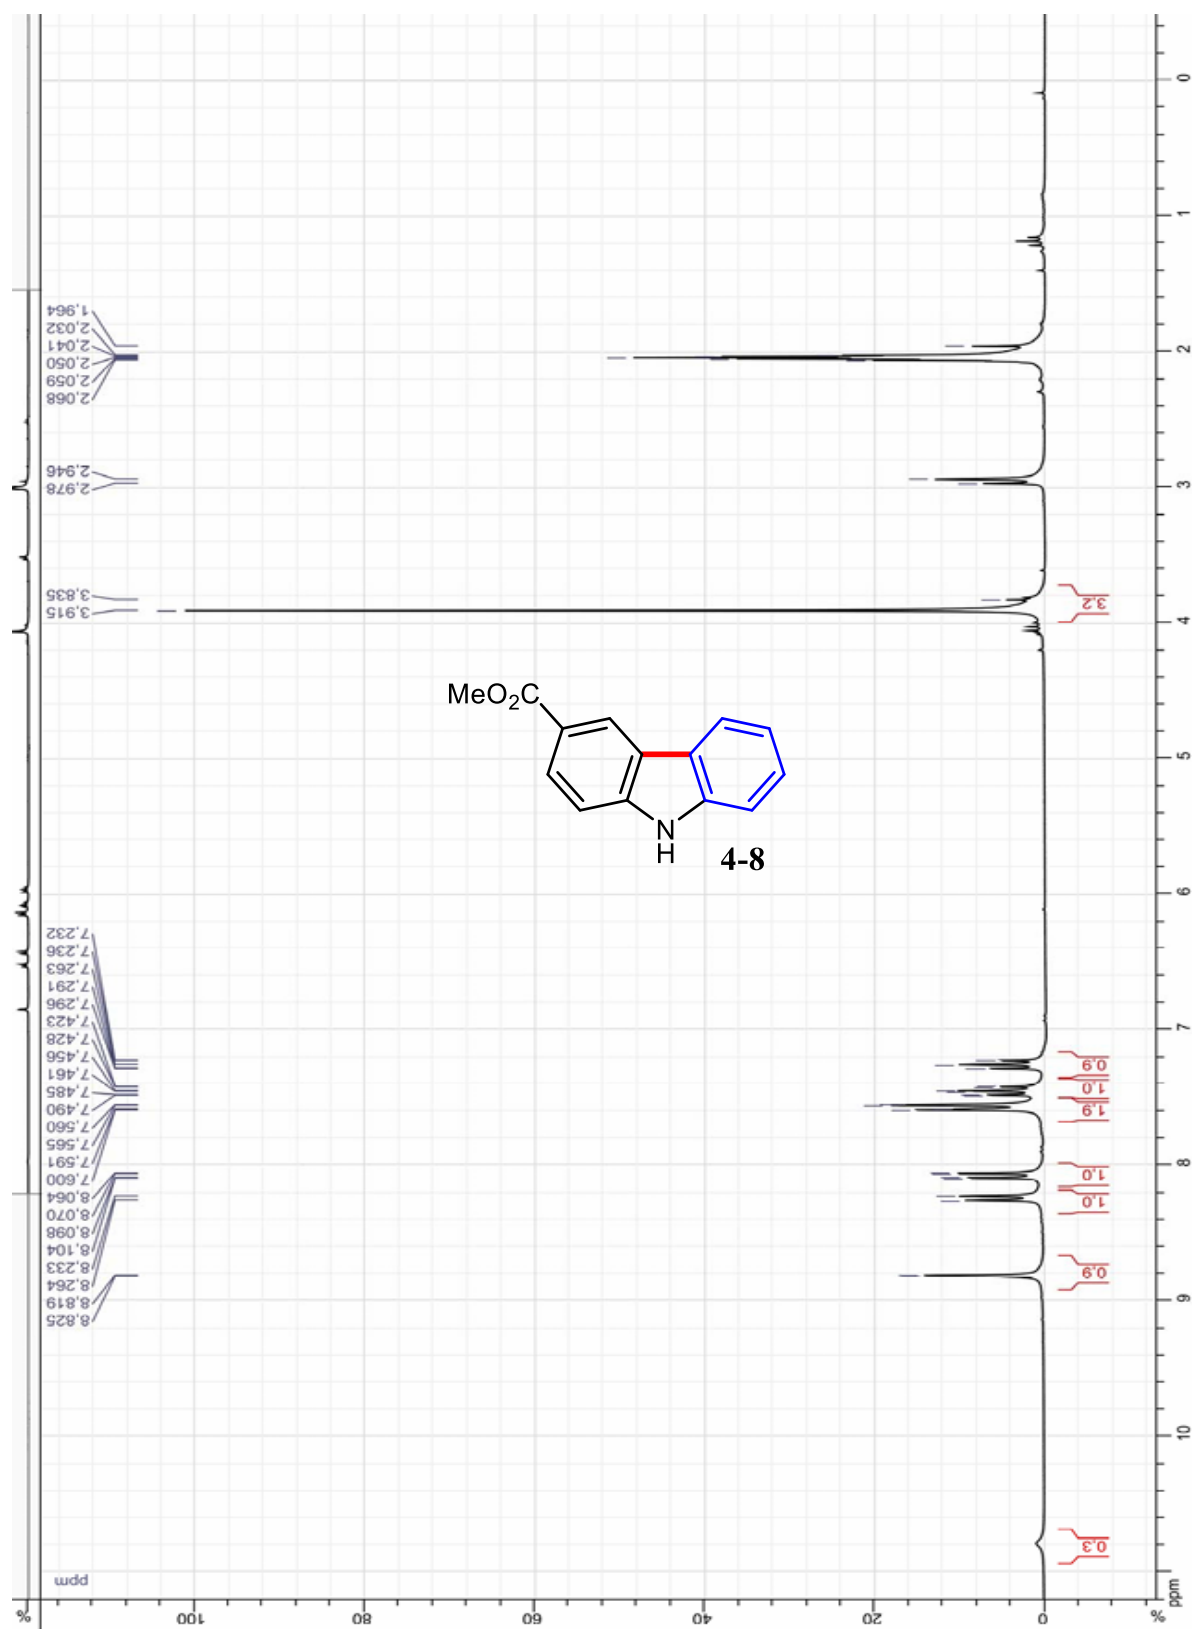

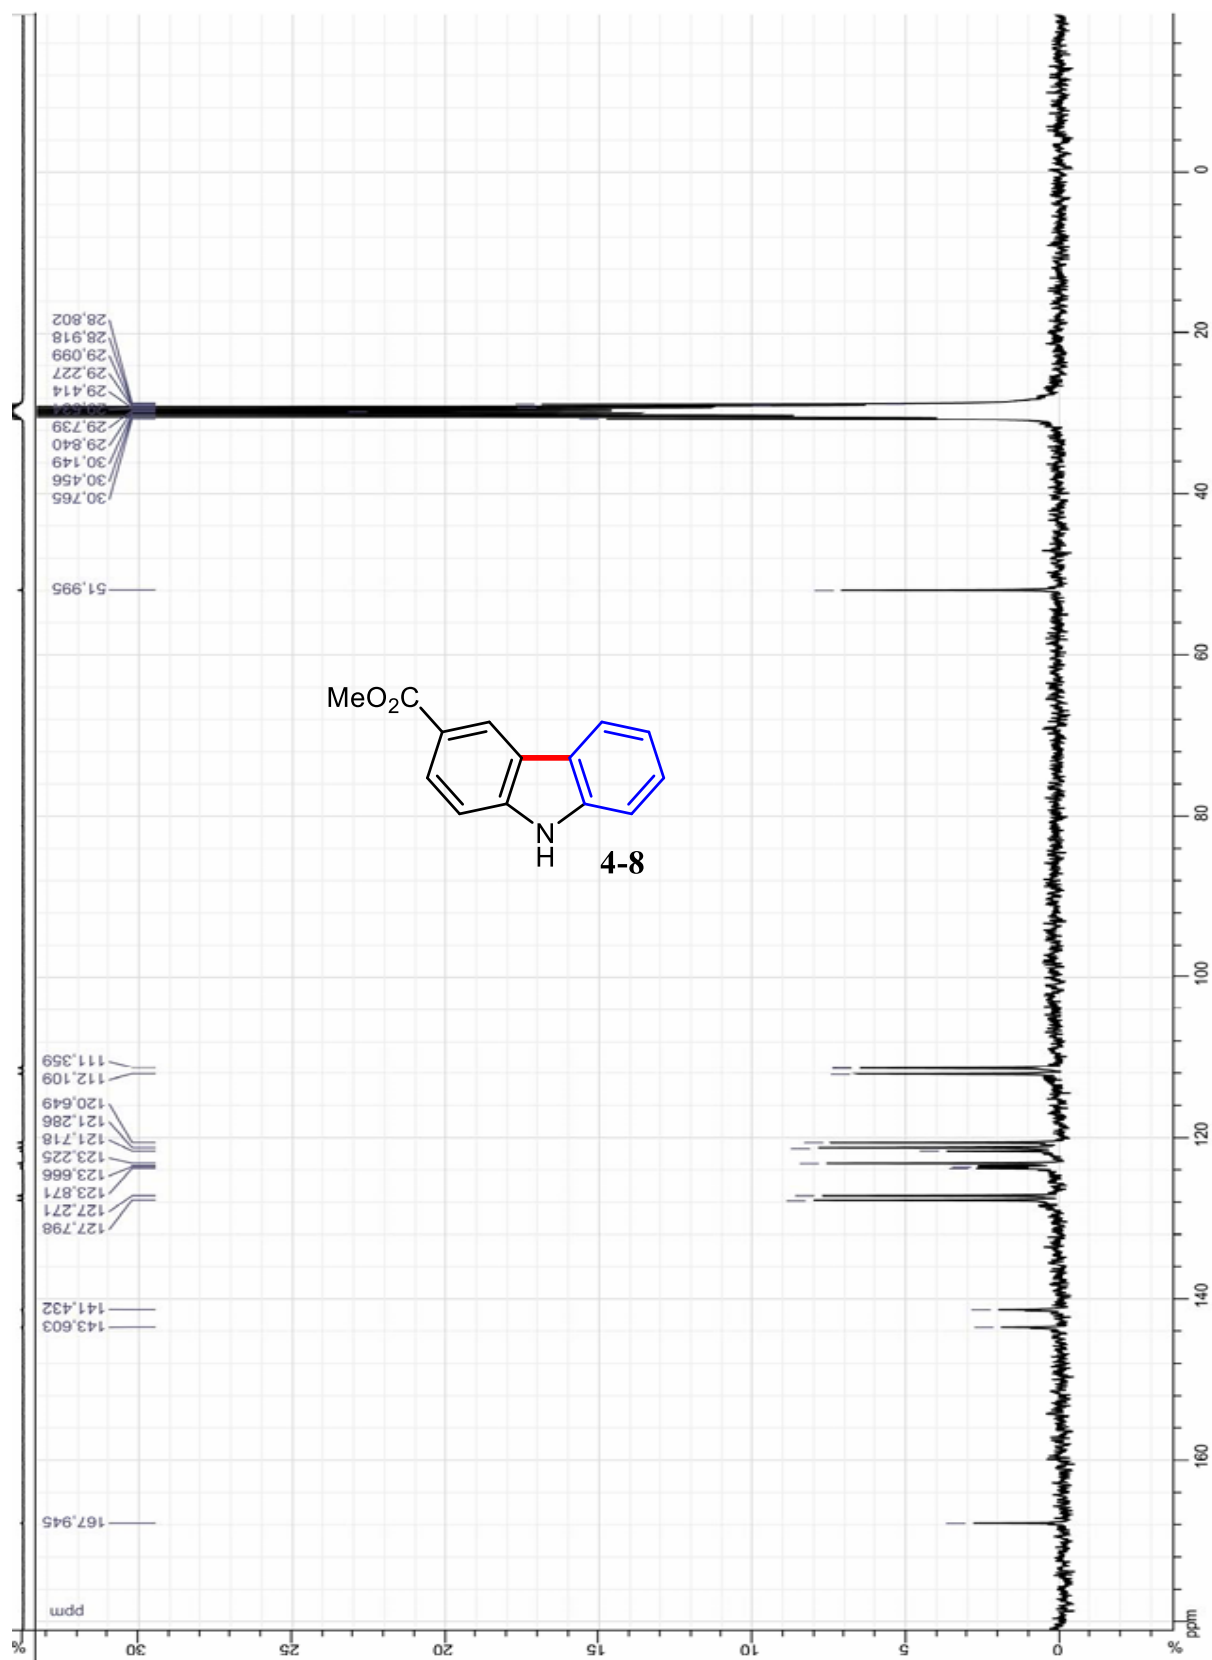

$^1\text{H}$  NMR and  $^{13}\text{C}$  NMR spectra of 3-nitro-9*H*-carbazole (**4-9**) in  $\text{CDCl}_3$

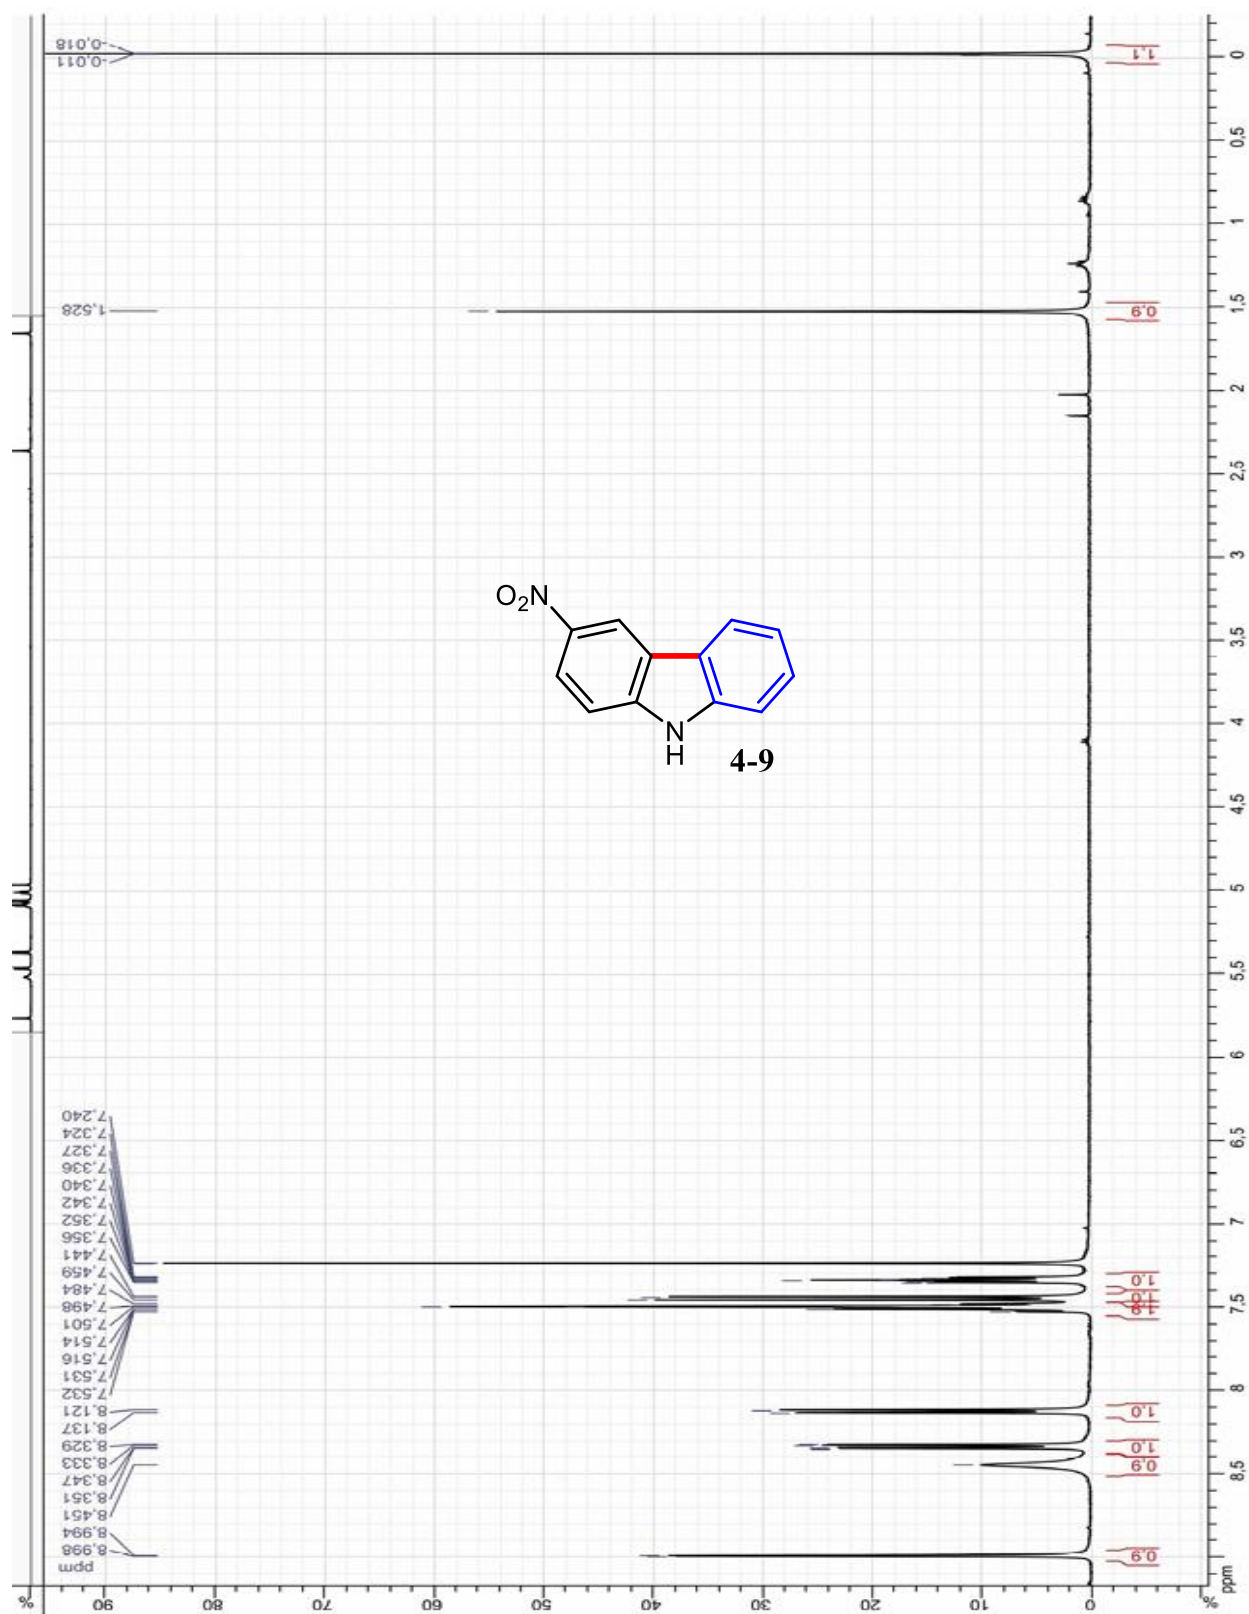

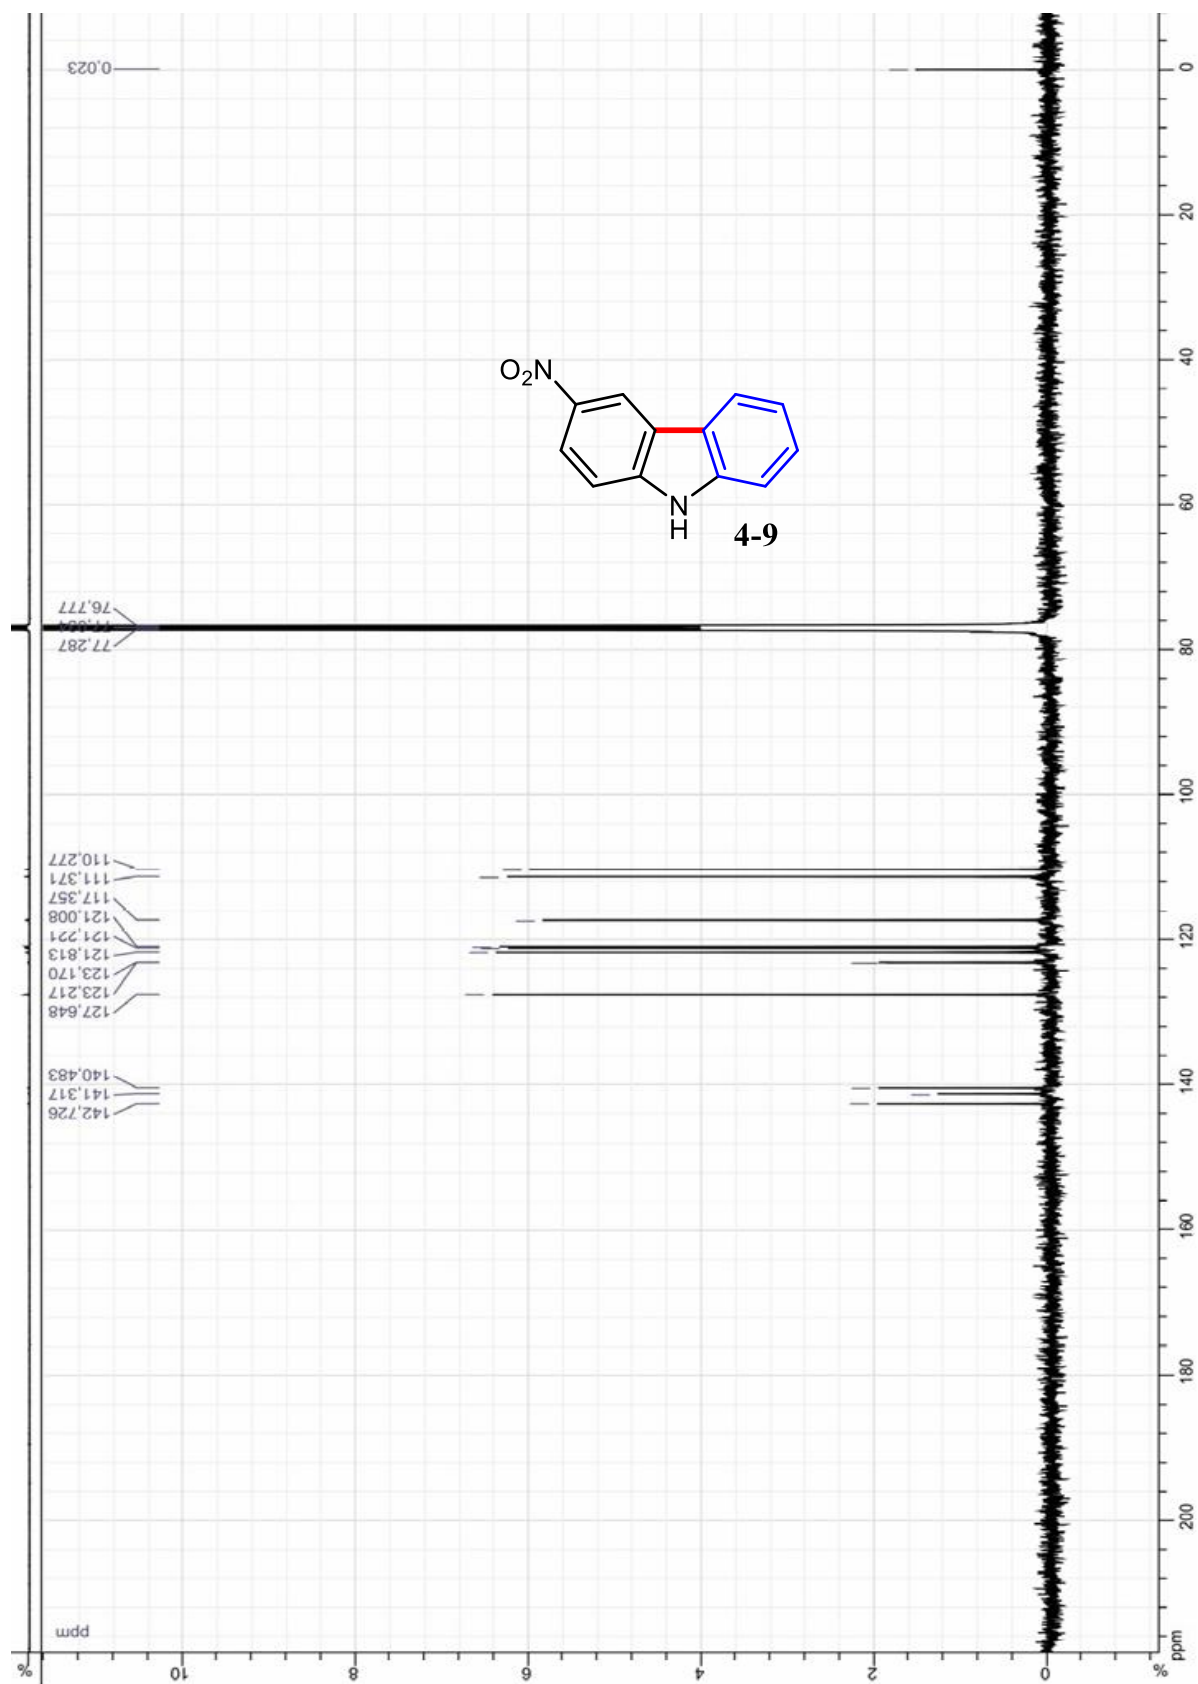



$^1\text{H}$  NMR and  $^{13}\text{C}$  NMR spectra of 2-methyl-9*H*-carbazole (**4-10**) in  $\text{CDCl}_3$

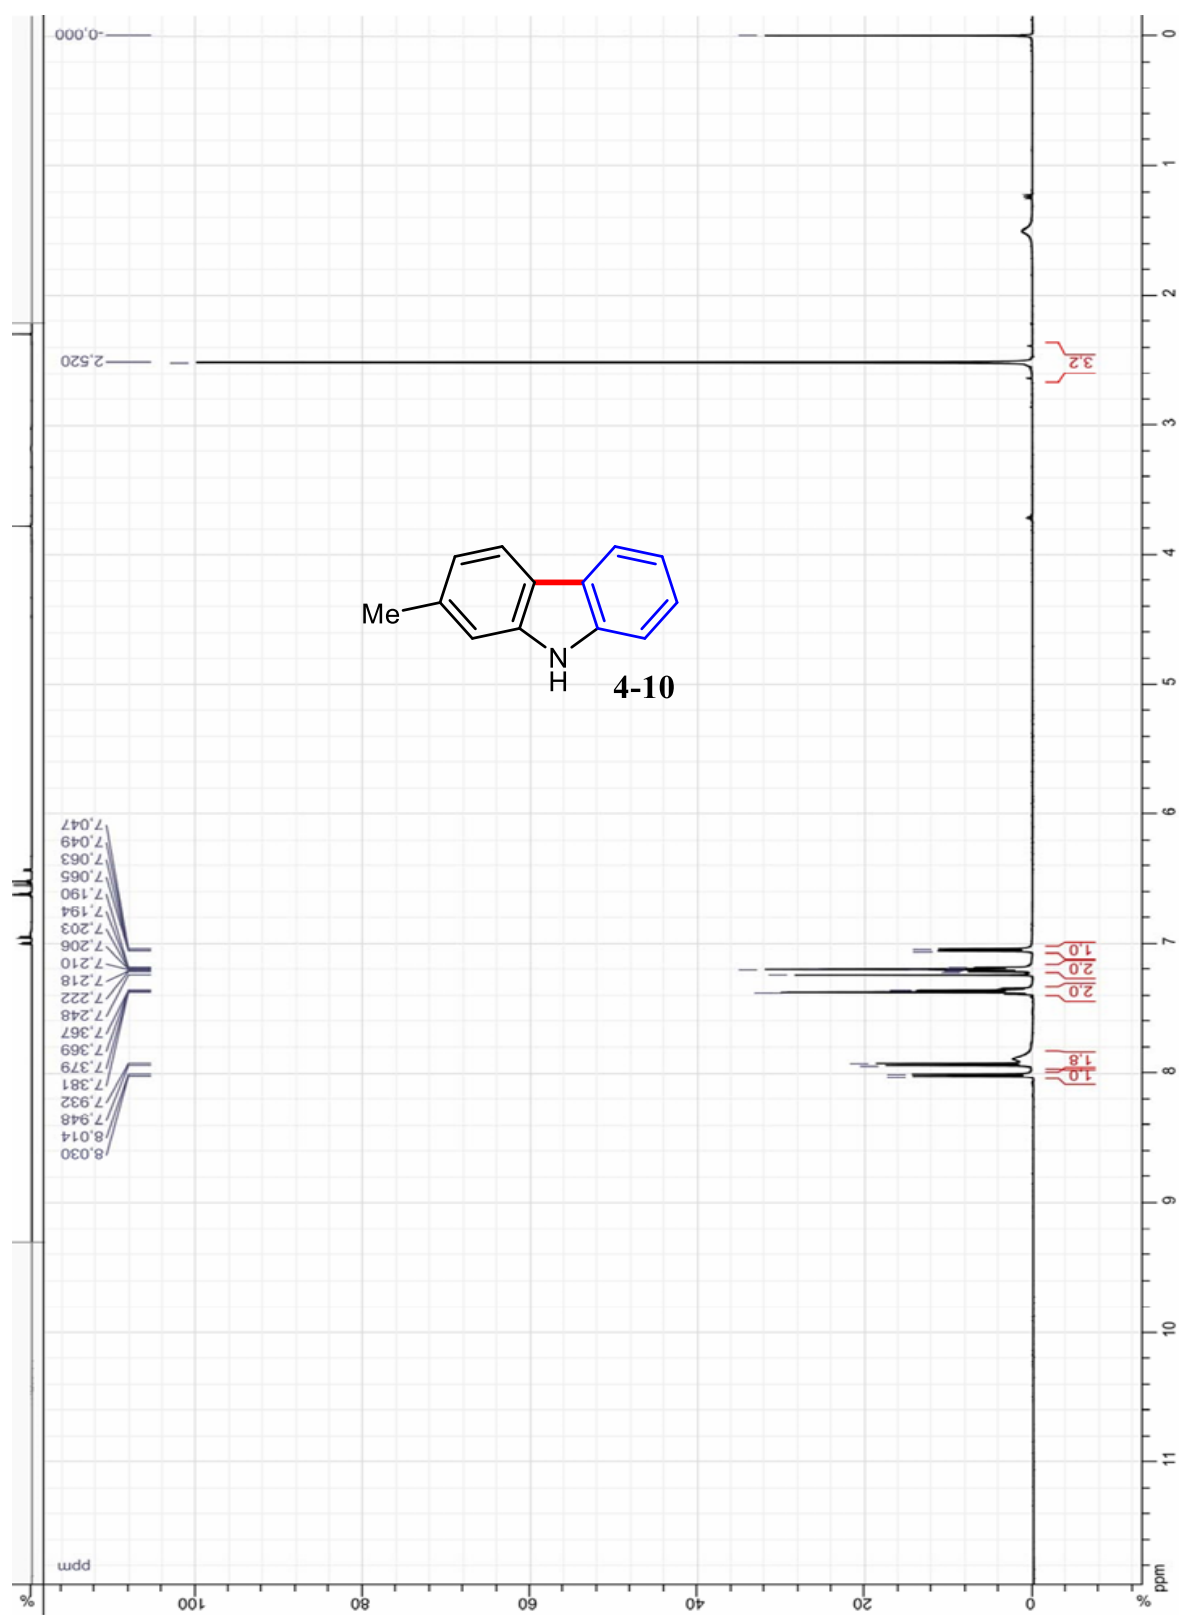

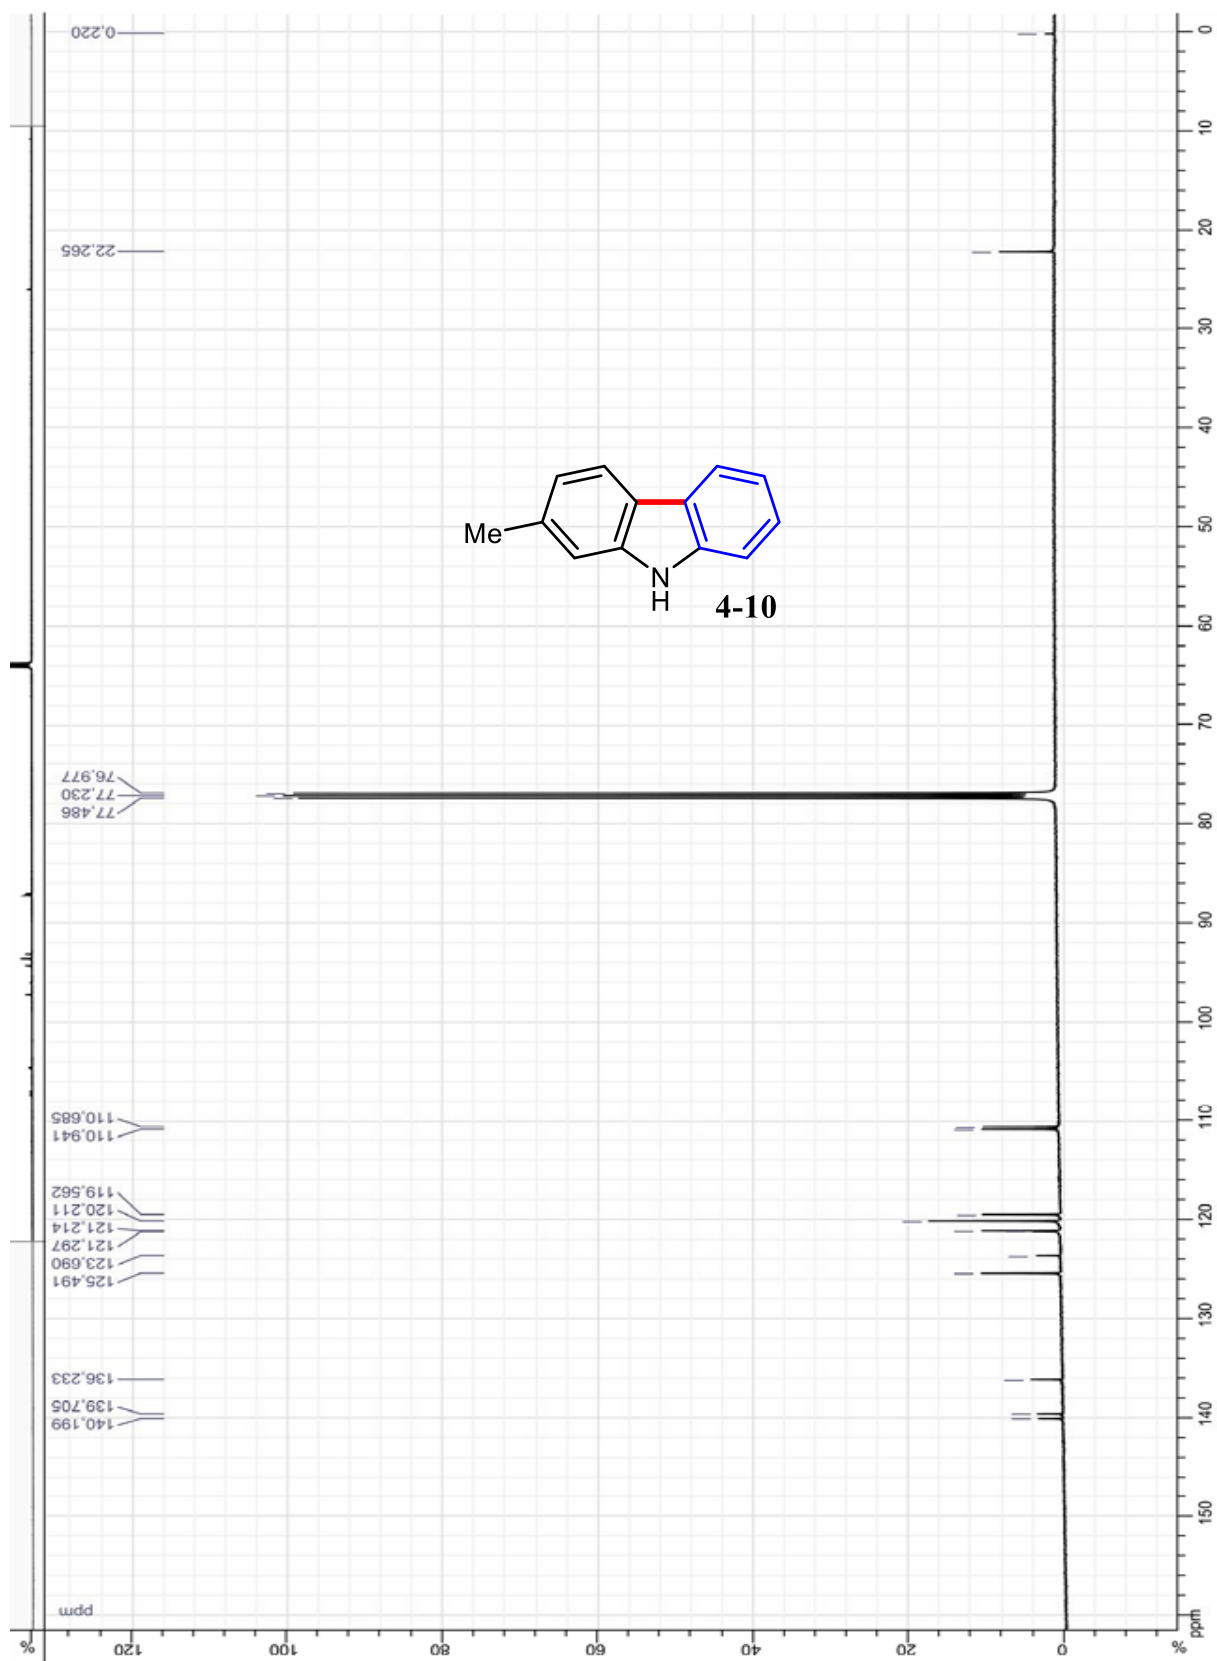

$^1\text{H}$  NMR and  $^{13}\text{C}$  NMR spectra of 3-methoxy-9*H*-carbazole (**4-11**) in  $\text{CDCl}_3$

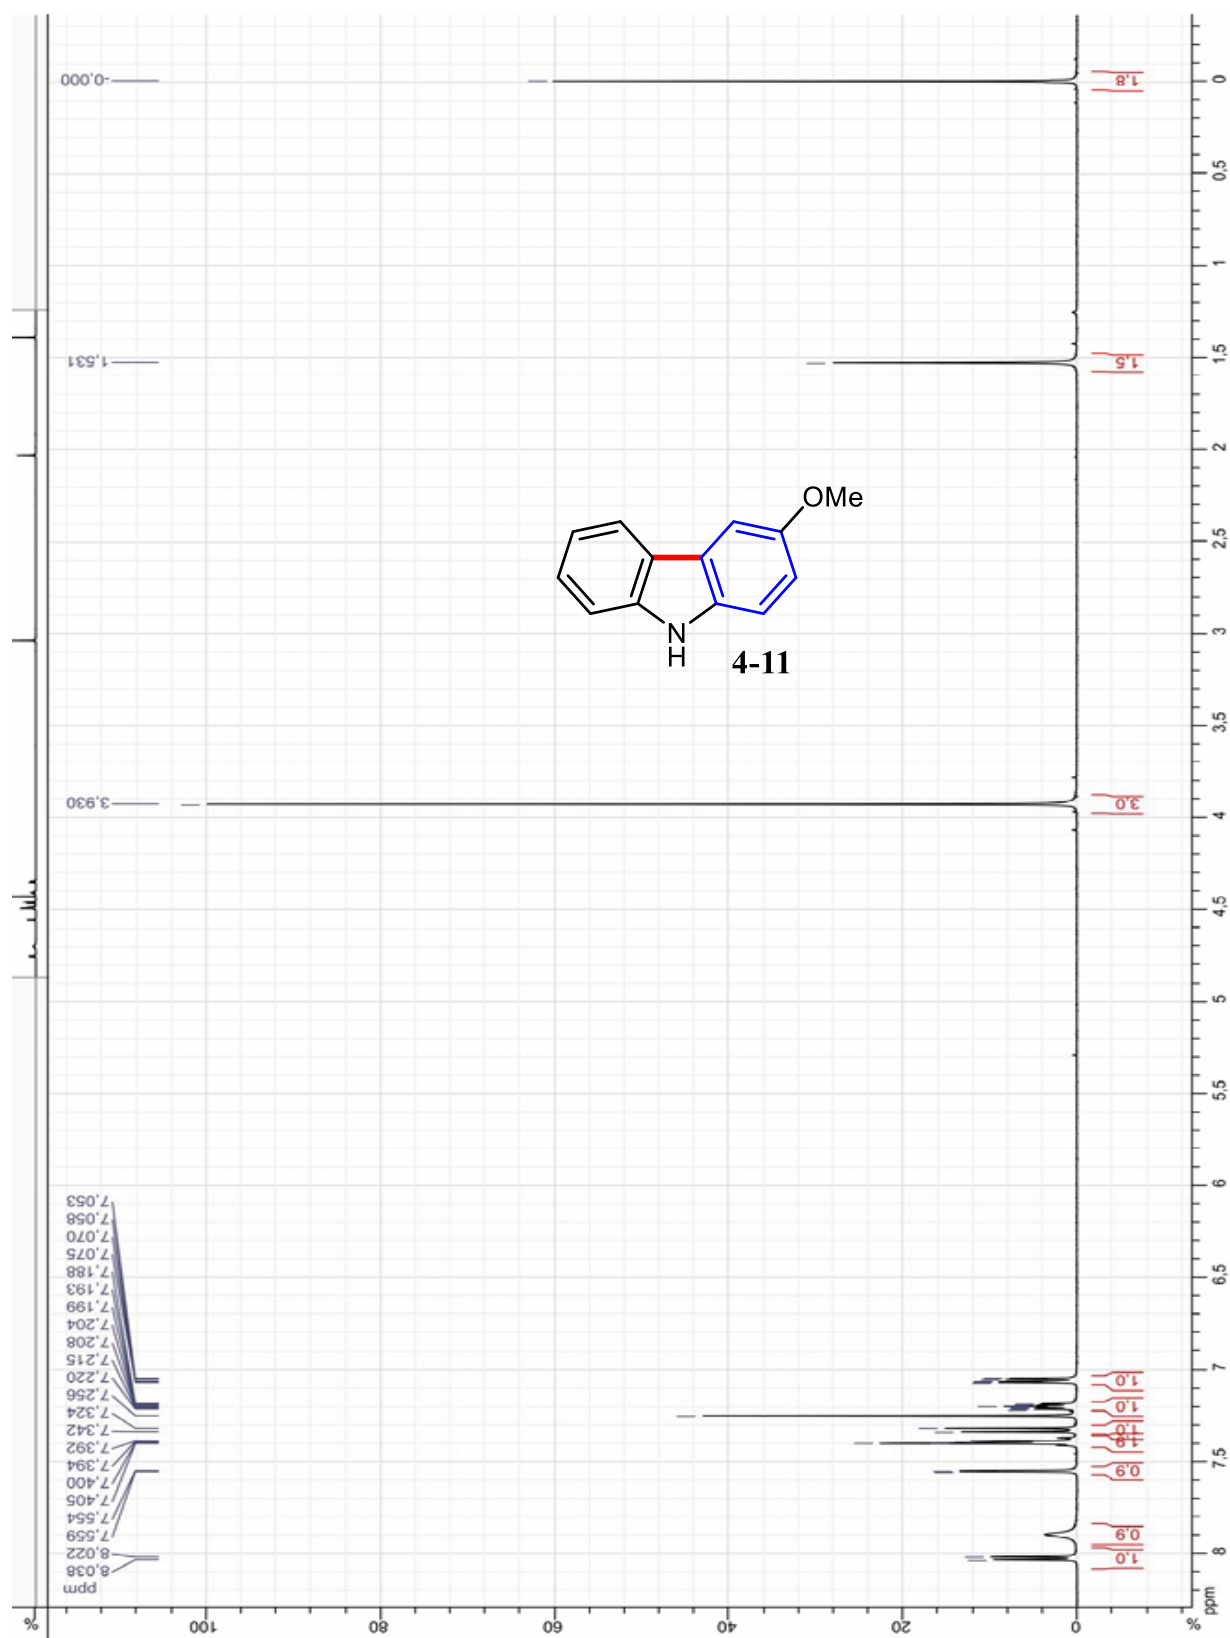

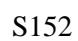

$^1\text{H}$  NMR spectrum of the reaction mixture of **3ah** to get regioisomeric ratio (C2:C4) of **4-12** and **4-13** in  $\text{CDCl}_3$

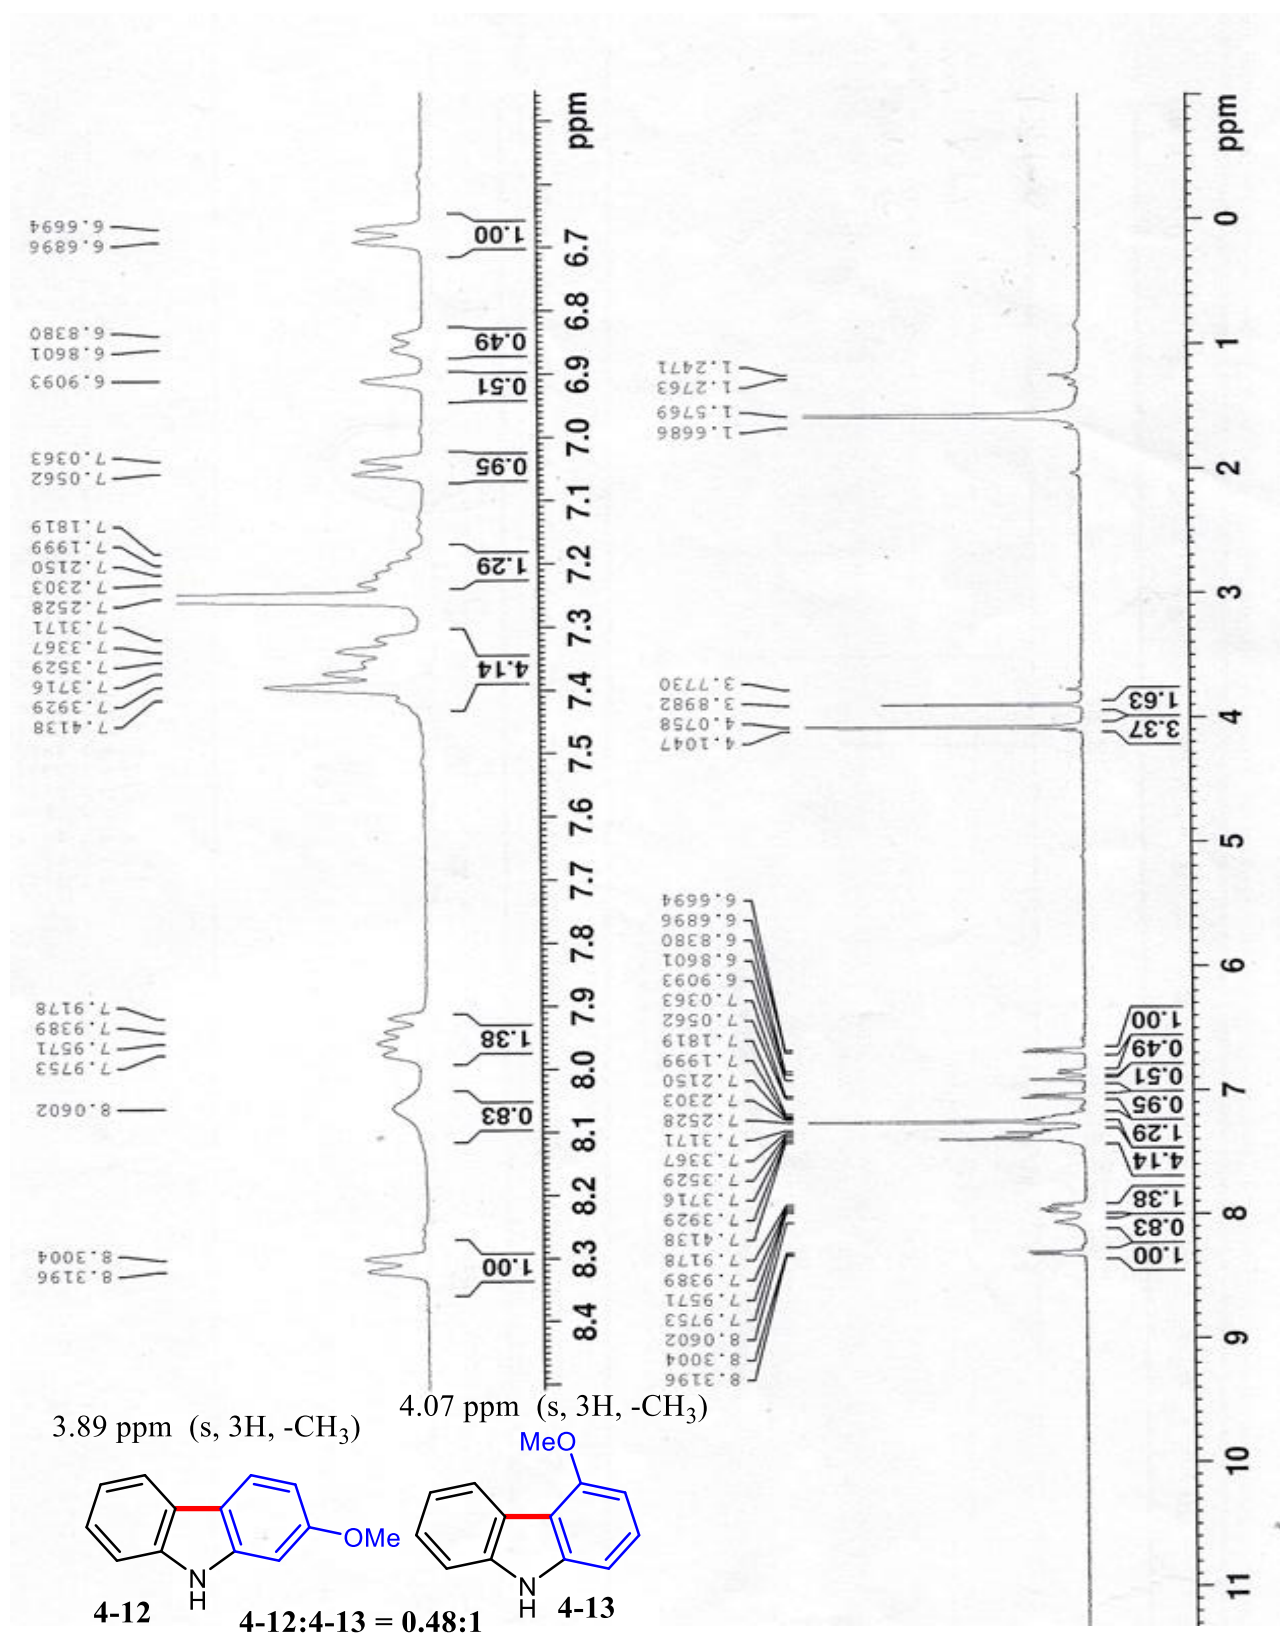

$^1\text{H}$  NMR and  $^{13}\text{C}$  NMR spectra of 2-methoxy-9*H*-carbazole (**4-12**) in Acetone- $\text{D}_6$

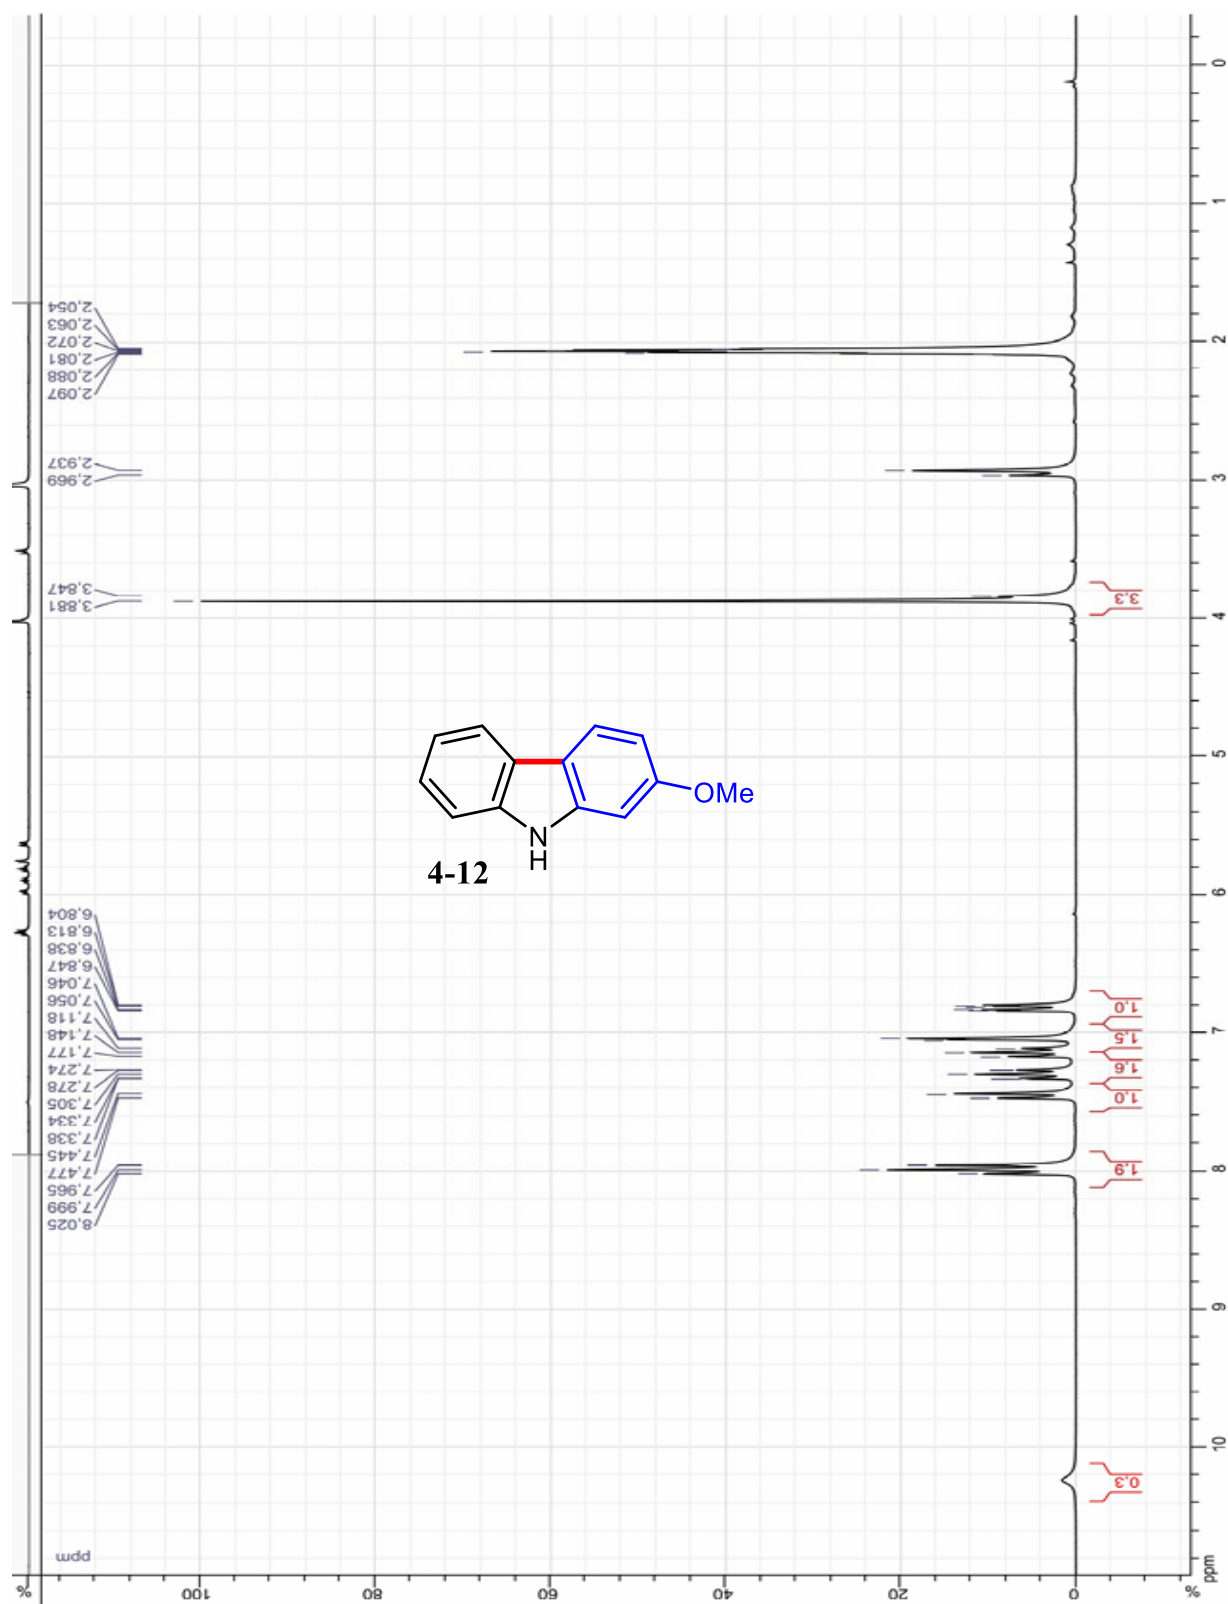

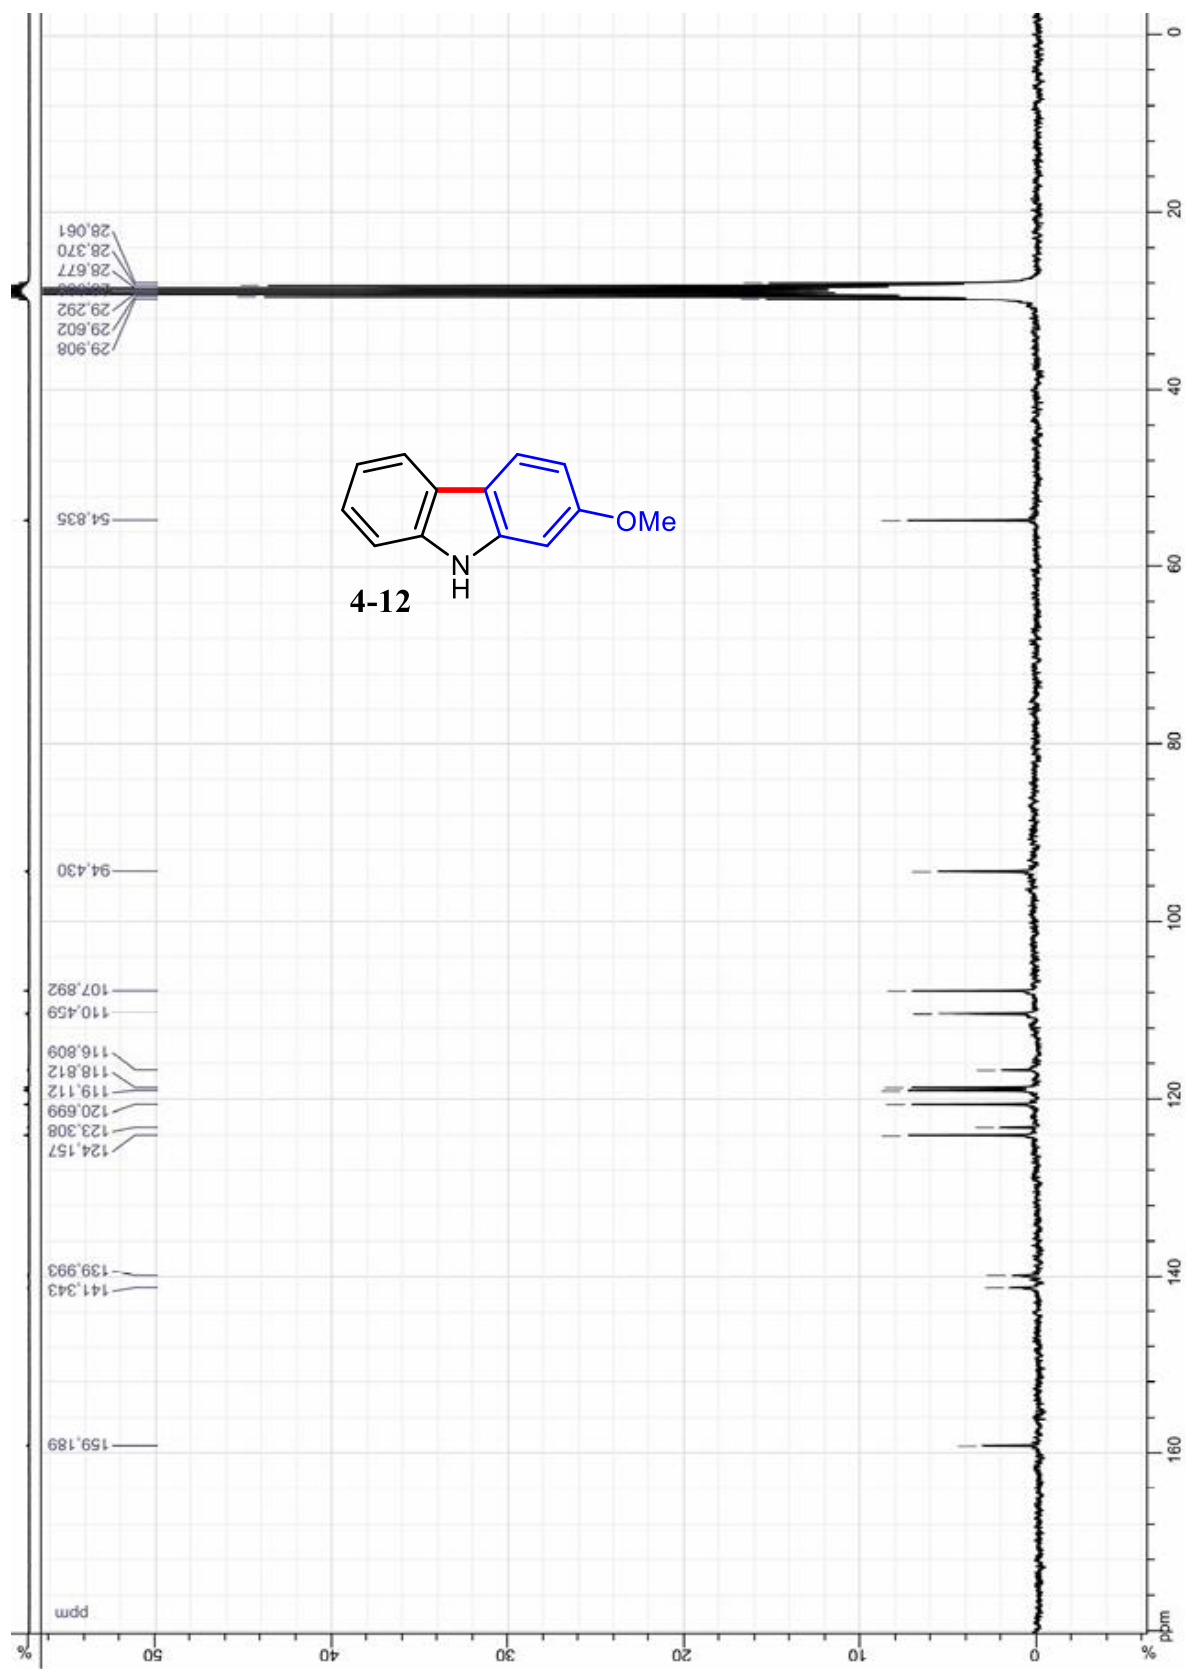



$^1\text{H}$  NMR and  $^{13}\text{C}$  NMR spectra of 4-methoxy-9*H*-carbazole (**4-13**) in Acetone- $\text{D}_6$

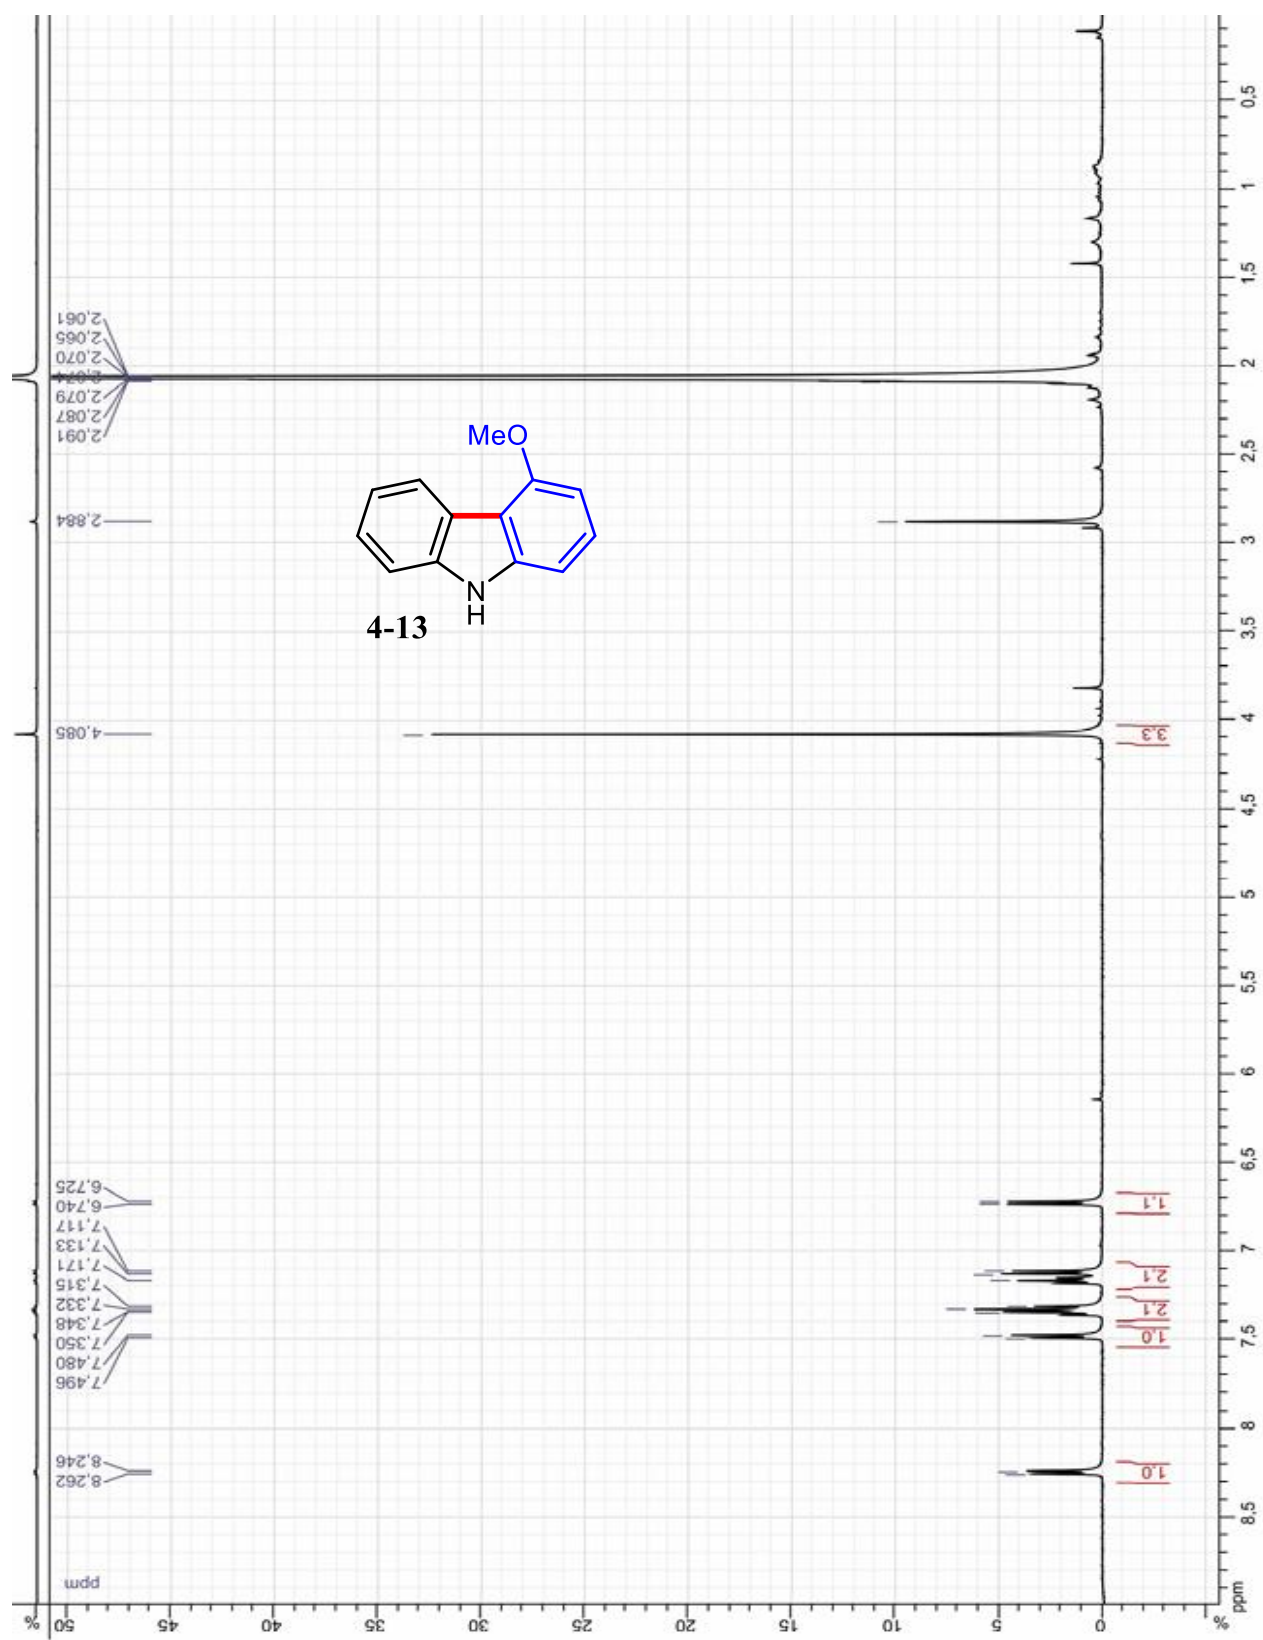



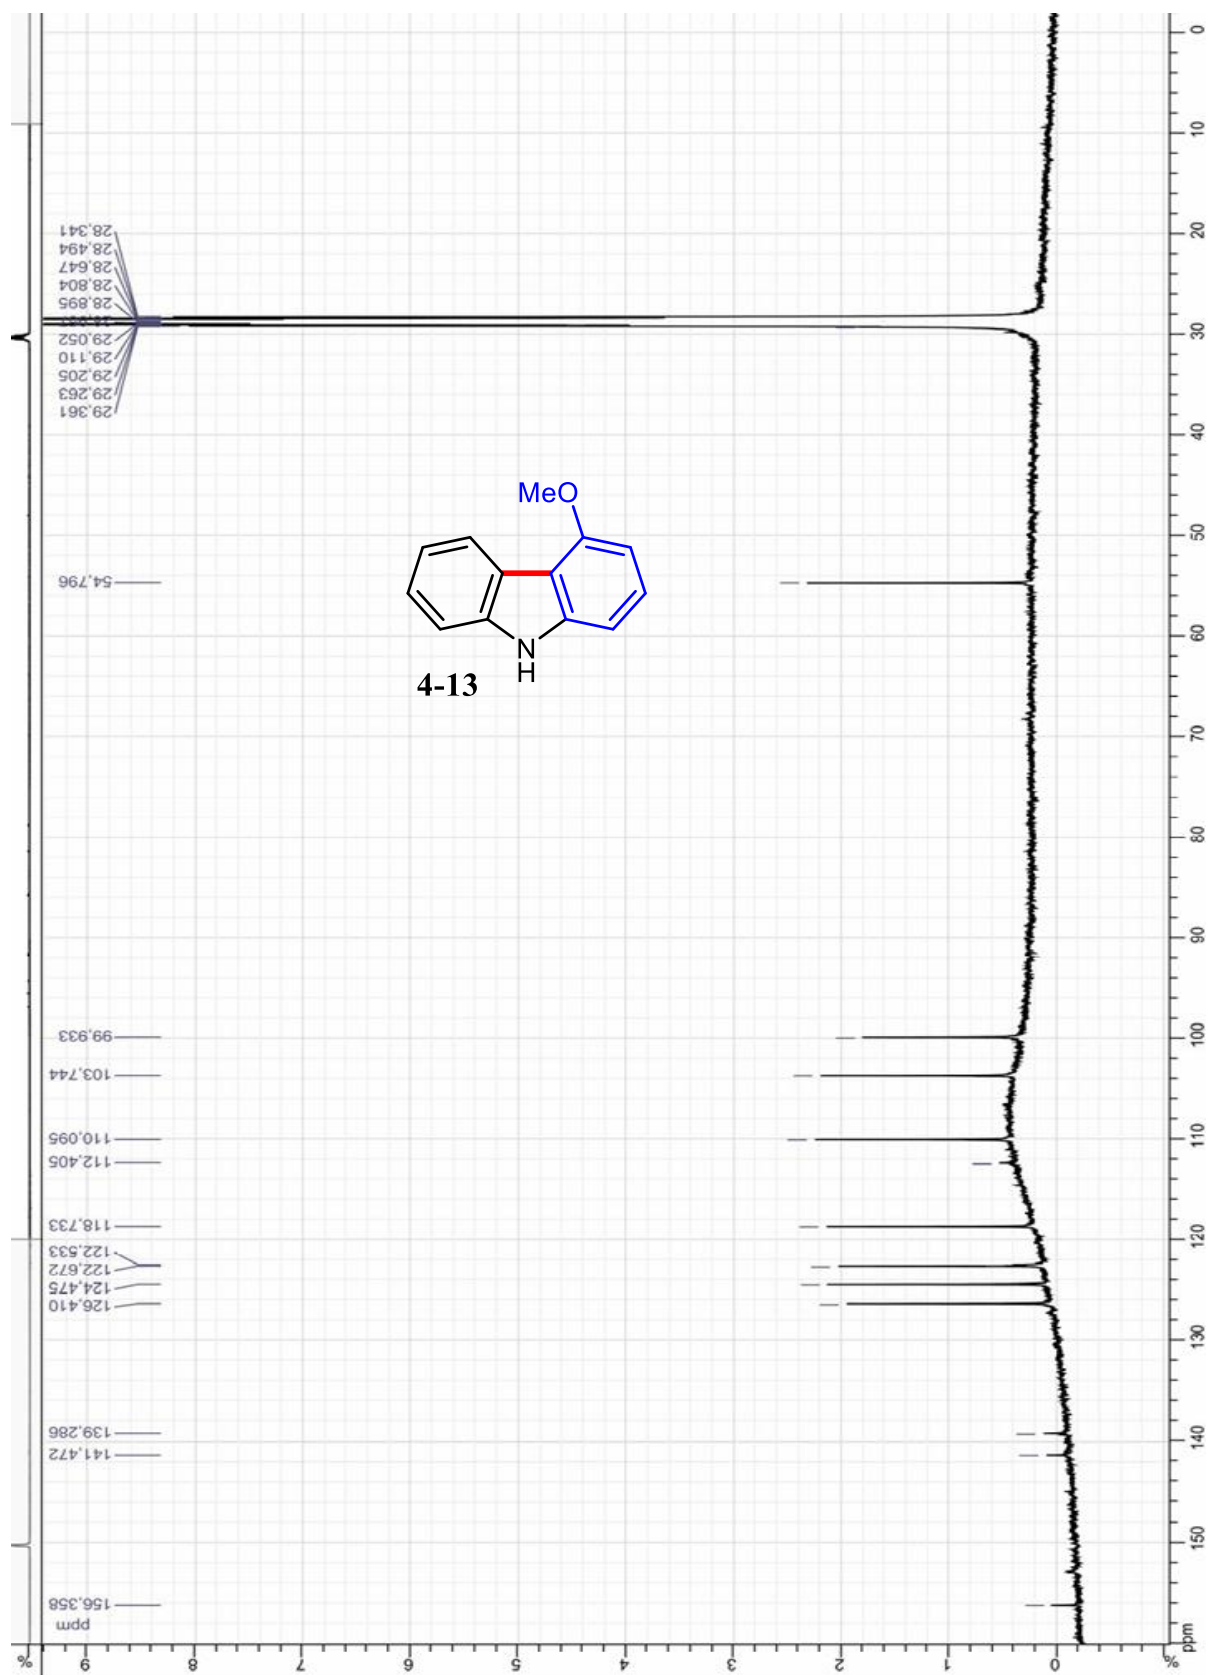

$^1\text{H}$  NMR spectrum of the reaction mixture of **3ai** to get regioisomeric ratio (C2:C4) of **4-14** and **4-15** in  $\text{CDCl}_3$

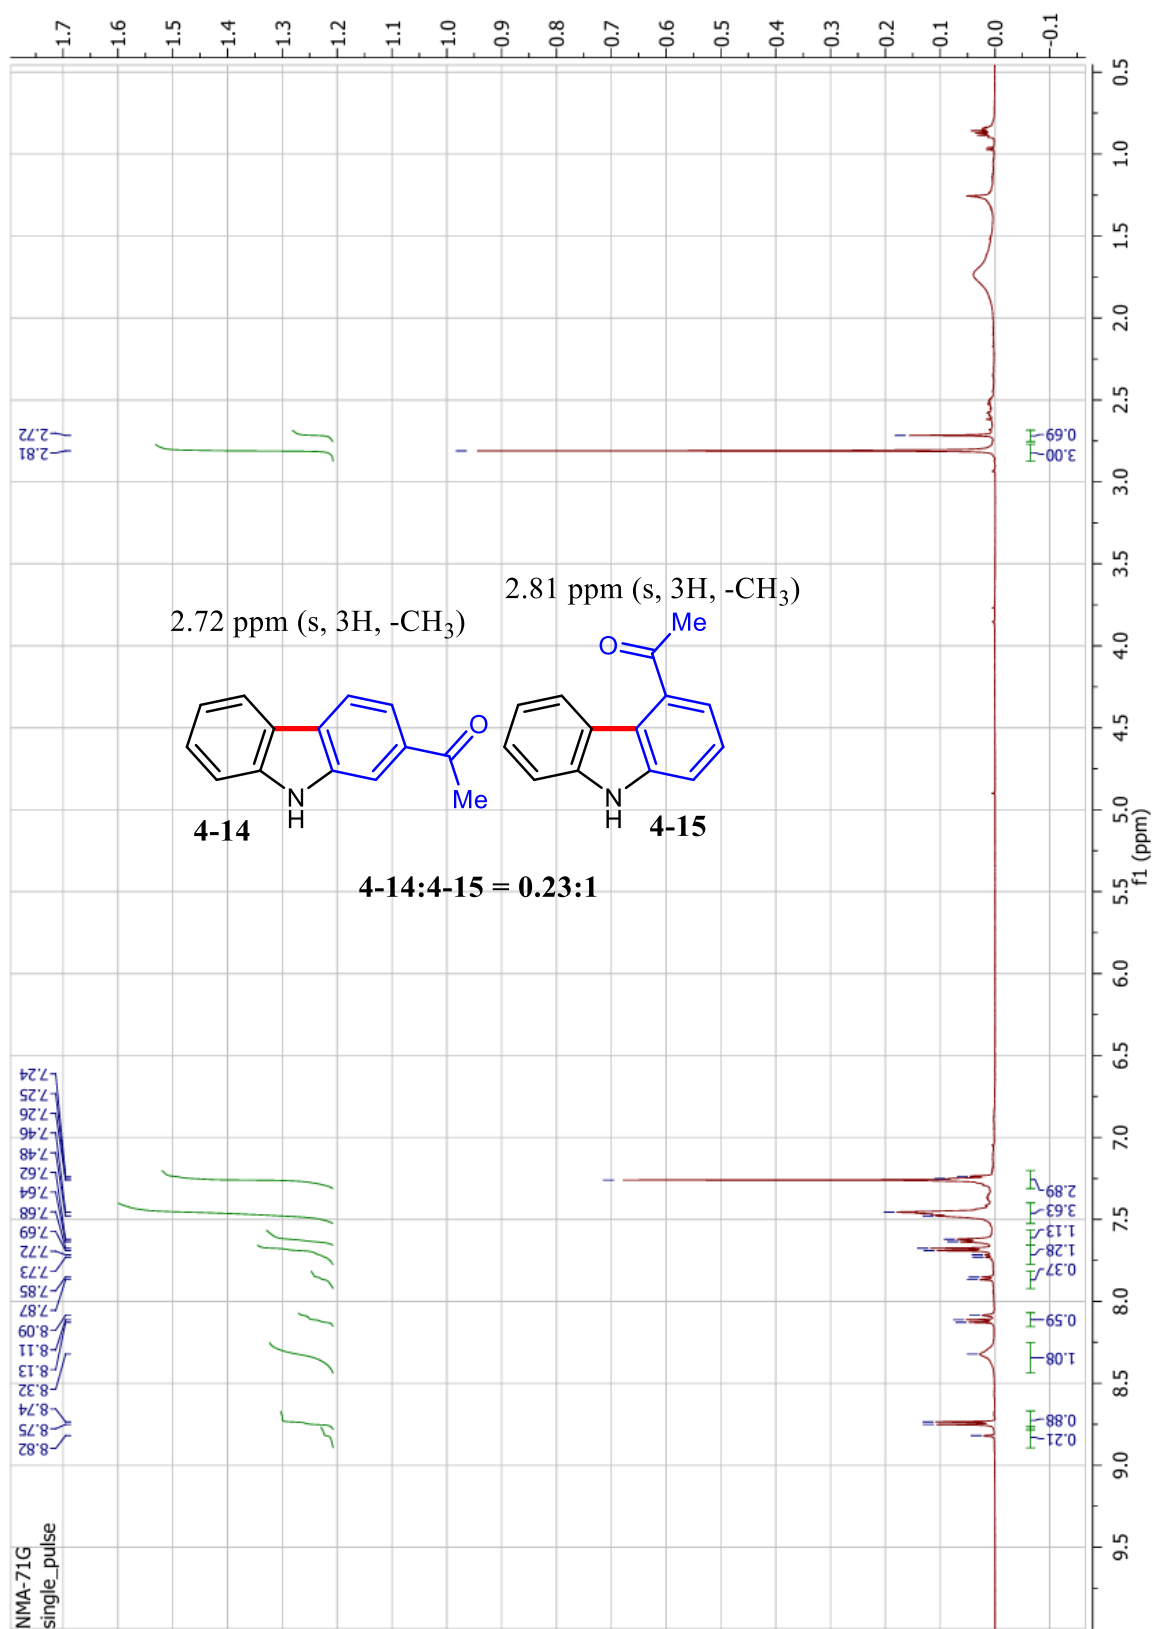

$^1\text{H}$  NMR and  $^{13}\text{C}$  NMR spectra of 1-(9*H*-carbazol-2-yl)ethan-1-one (**4-14**) in  $\text{CDCl}_3$

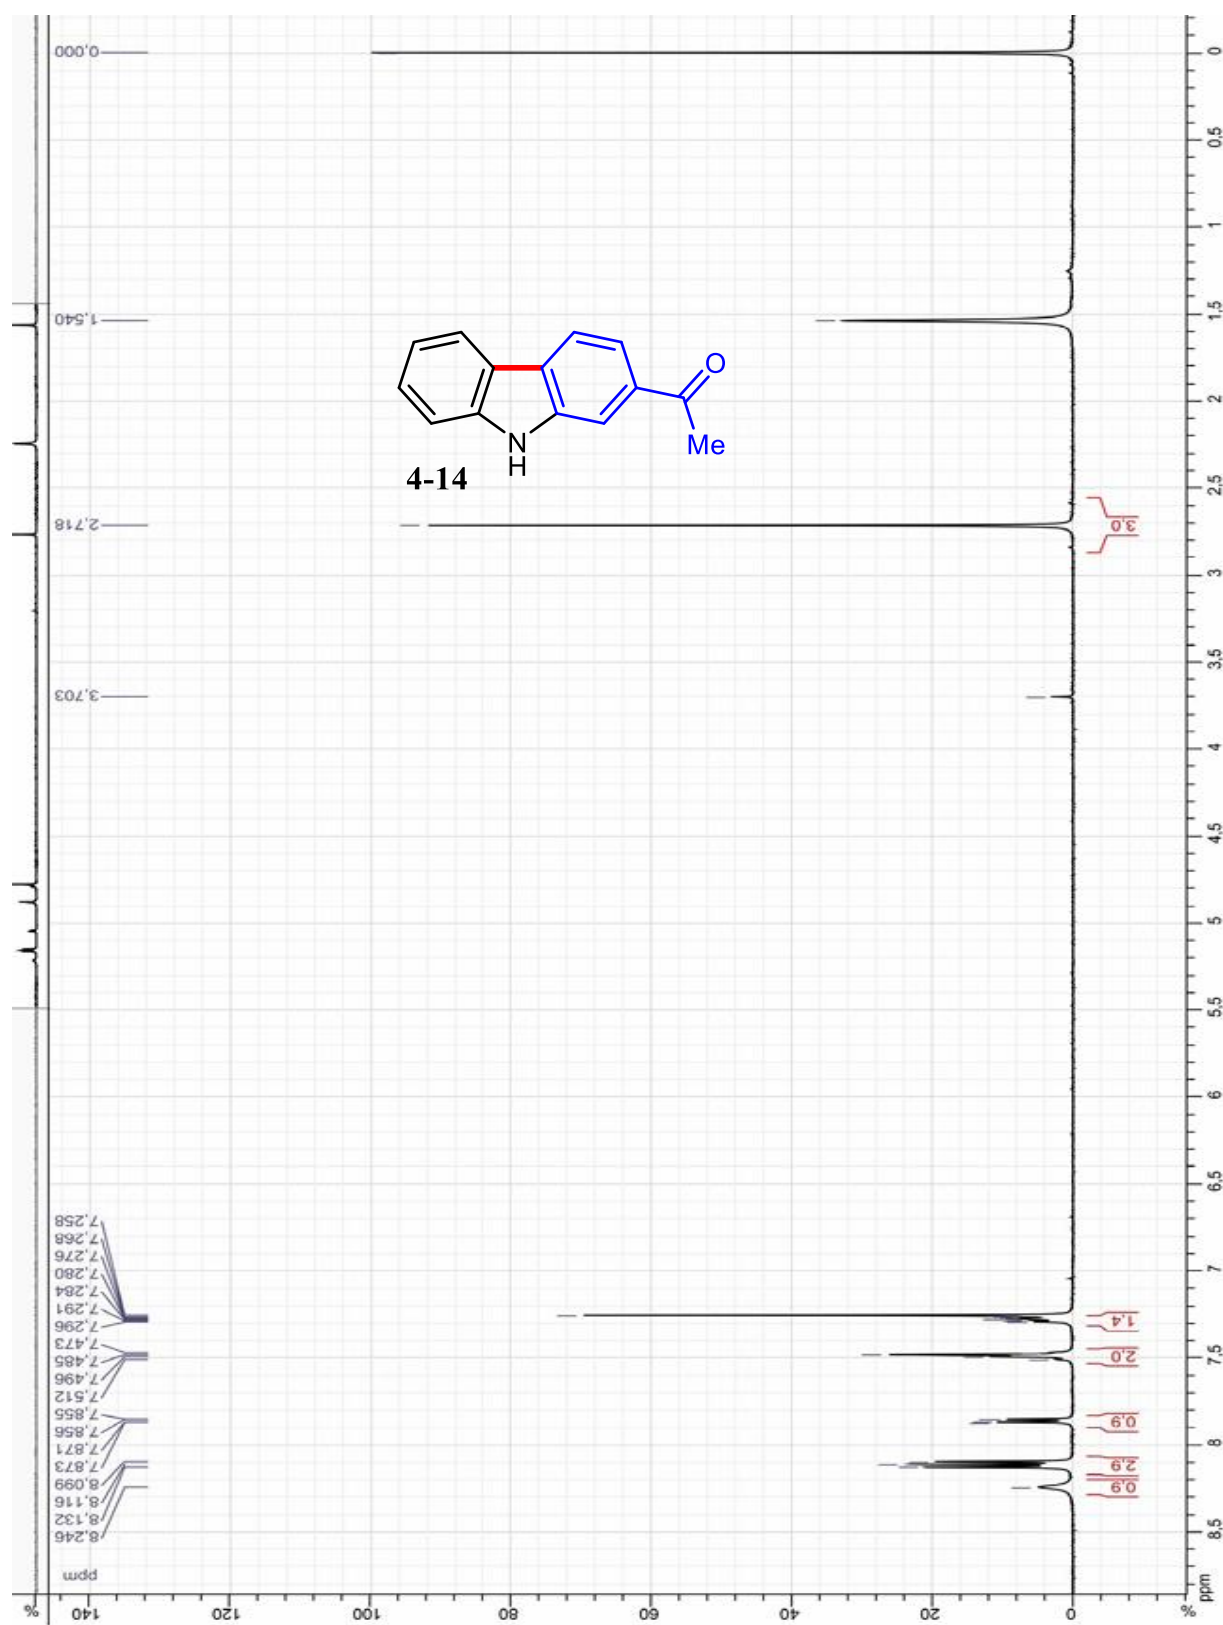

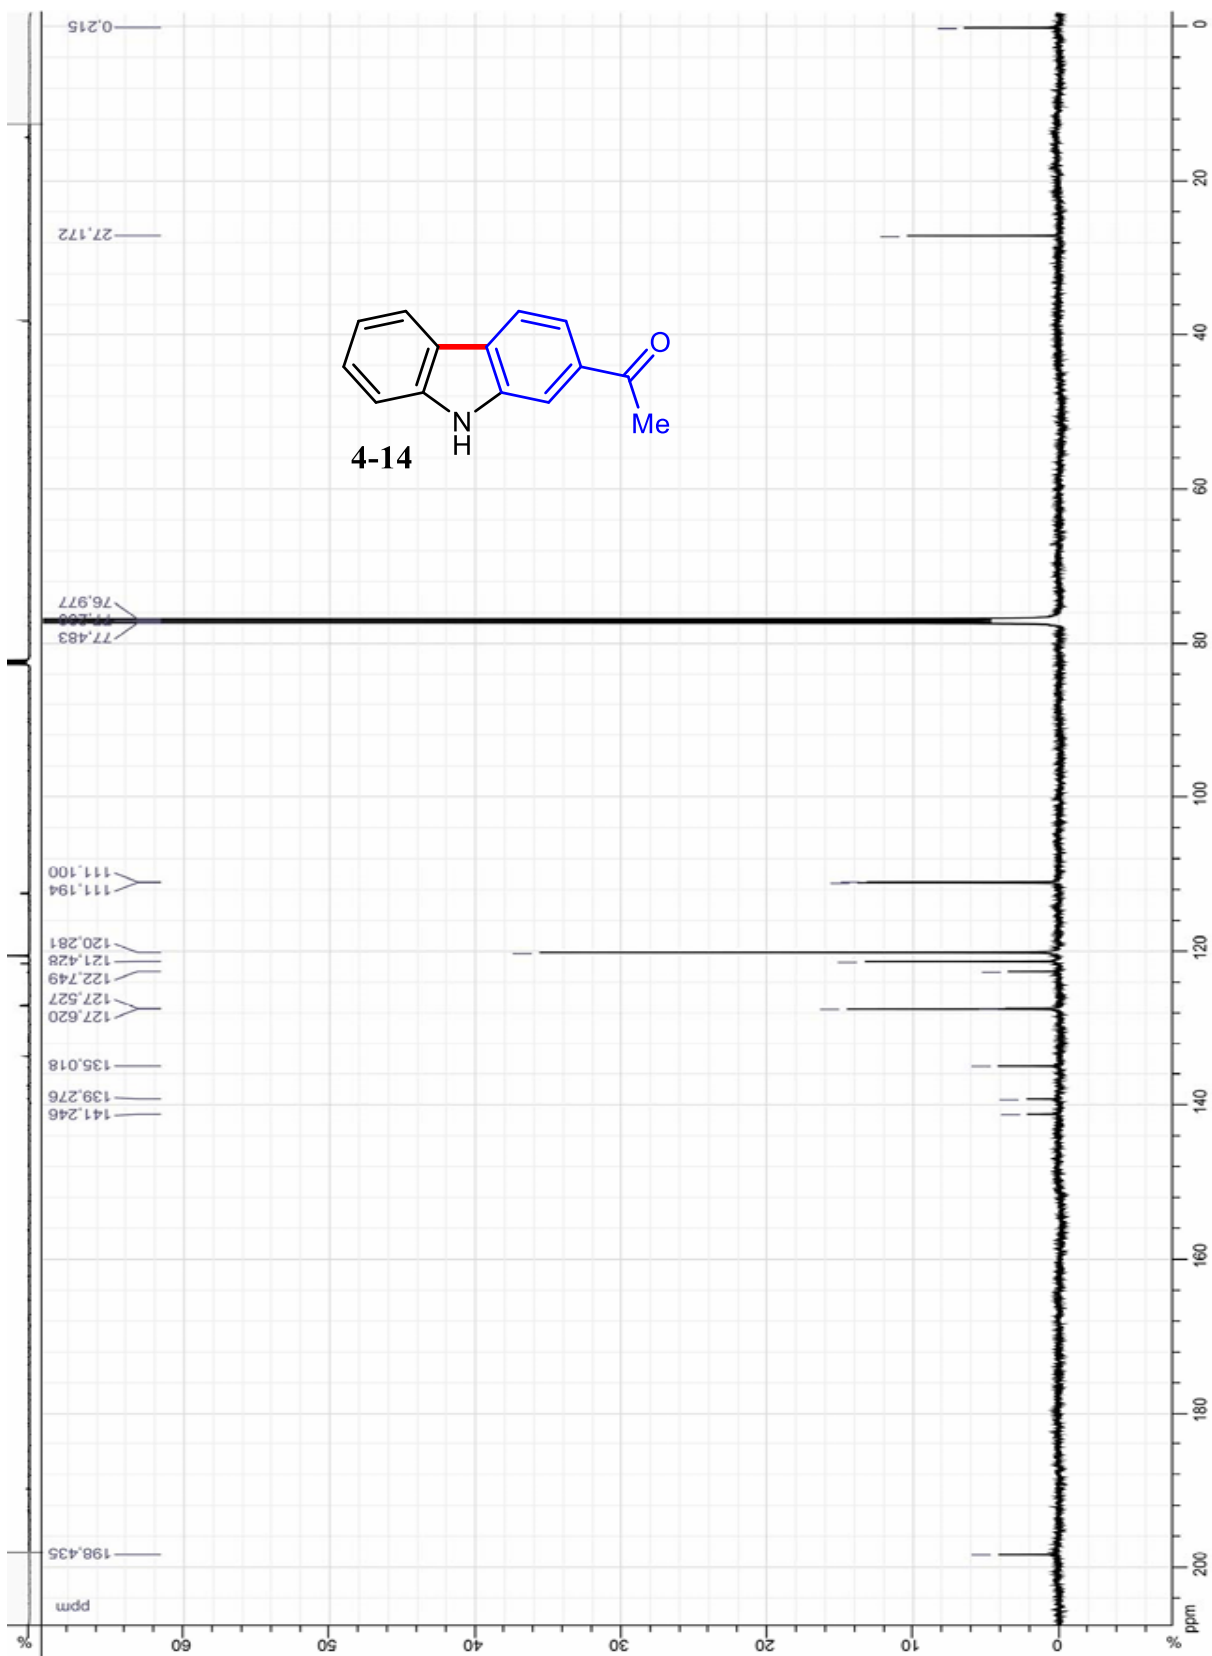

$^1\text{H}$  NMR and  $^{13}\text{C}$  NMR spectra of 1-(9*H*-carbazol-4-yl)ethan-1-one (**4-15**) in  $\text{CDCl}_3$

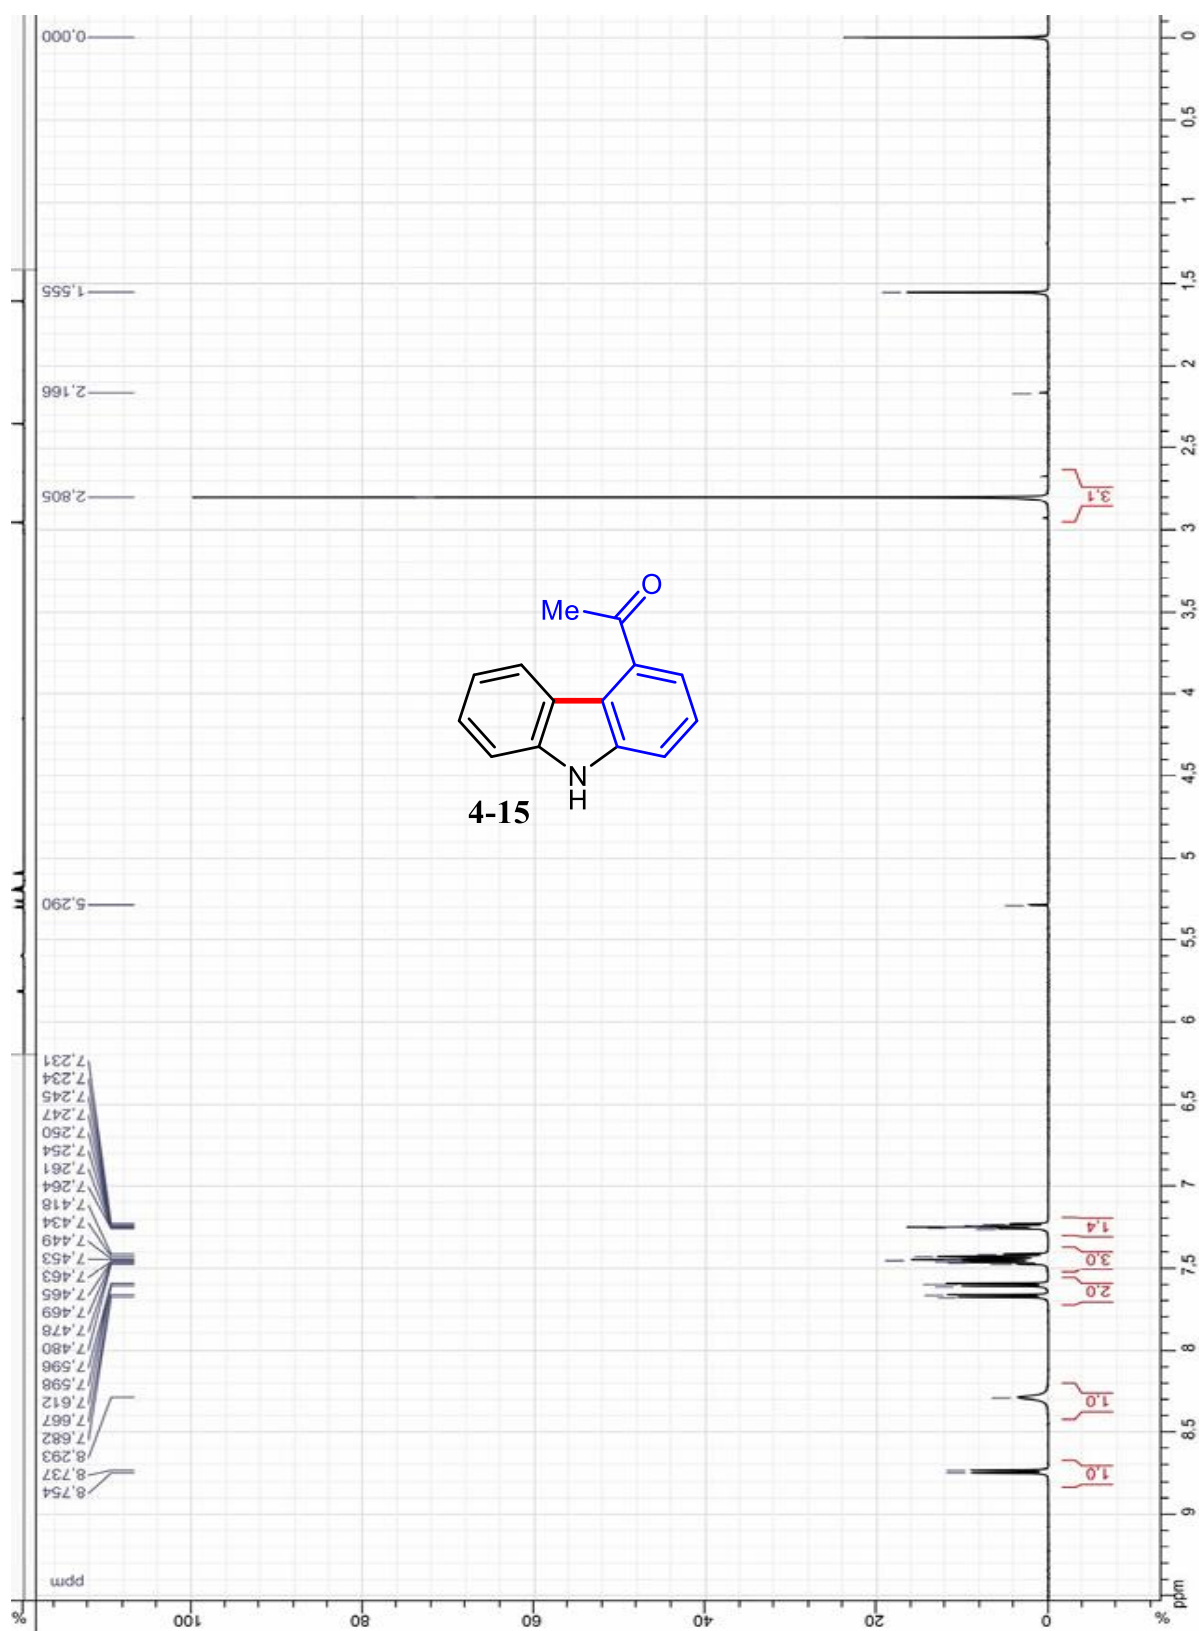

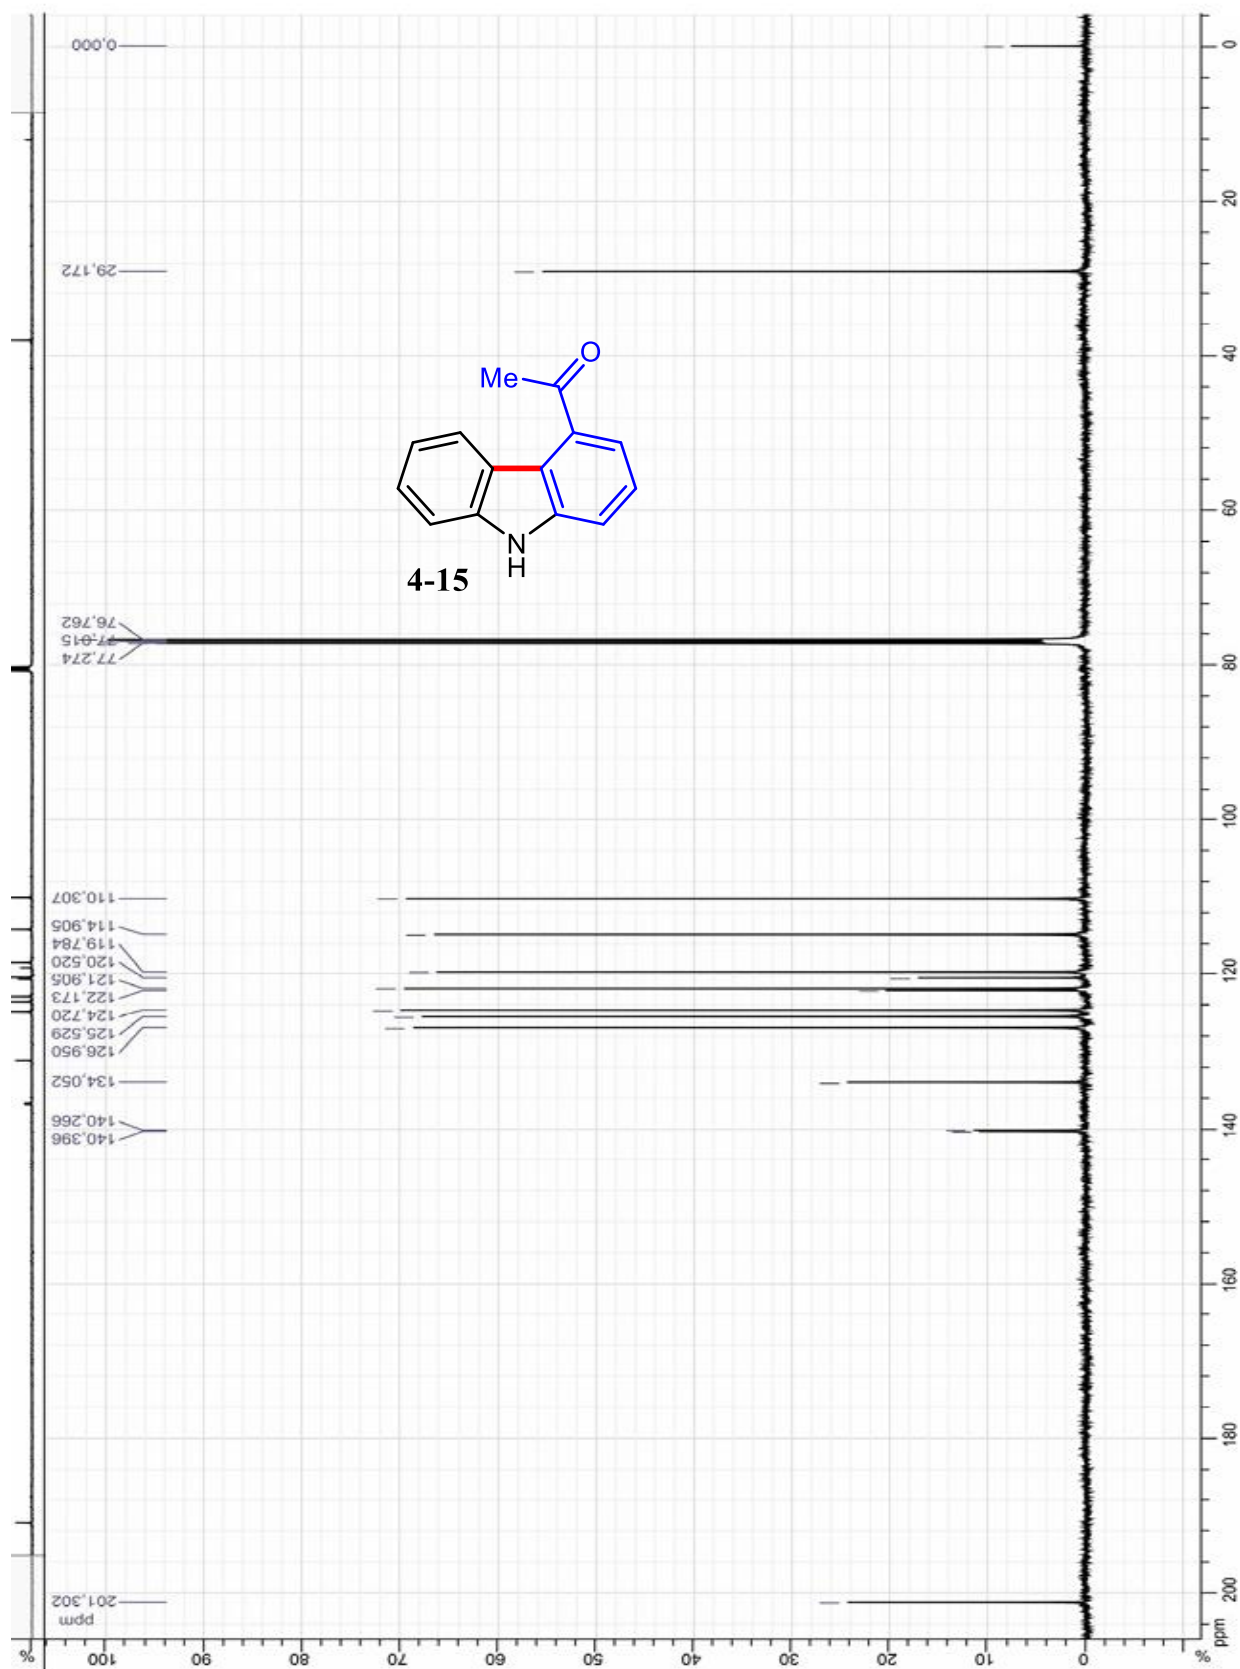

$^1\text{H}$  NMR spectrum of the reaction mixture of **3aj** to get regioisomeric ratio (C2:C4) of **4-1** and **4-17** in  $\text{CDCl}_3$

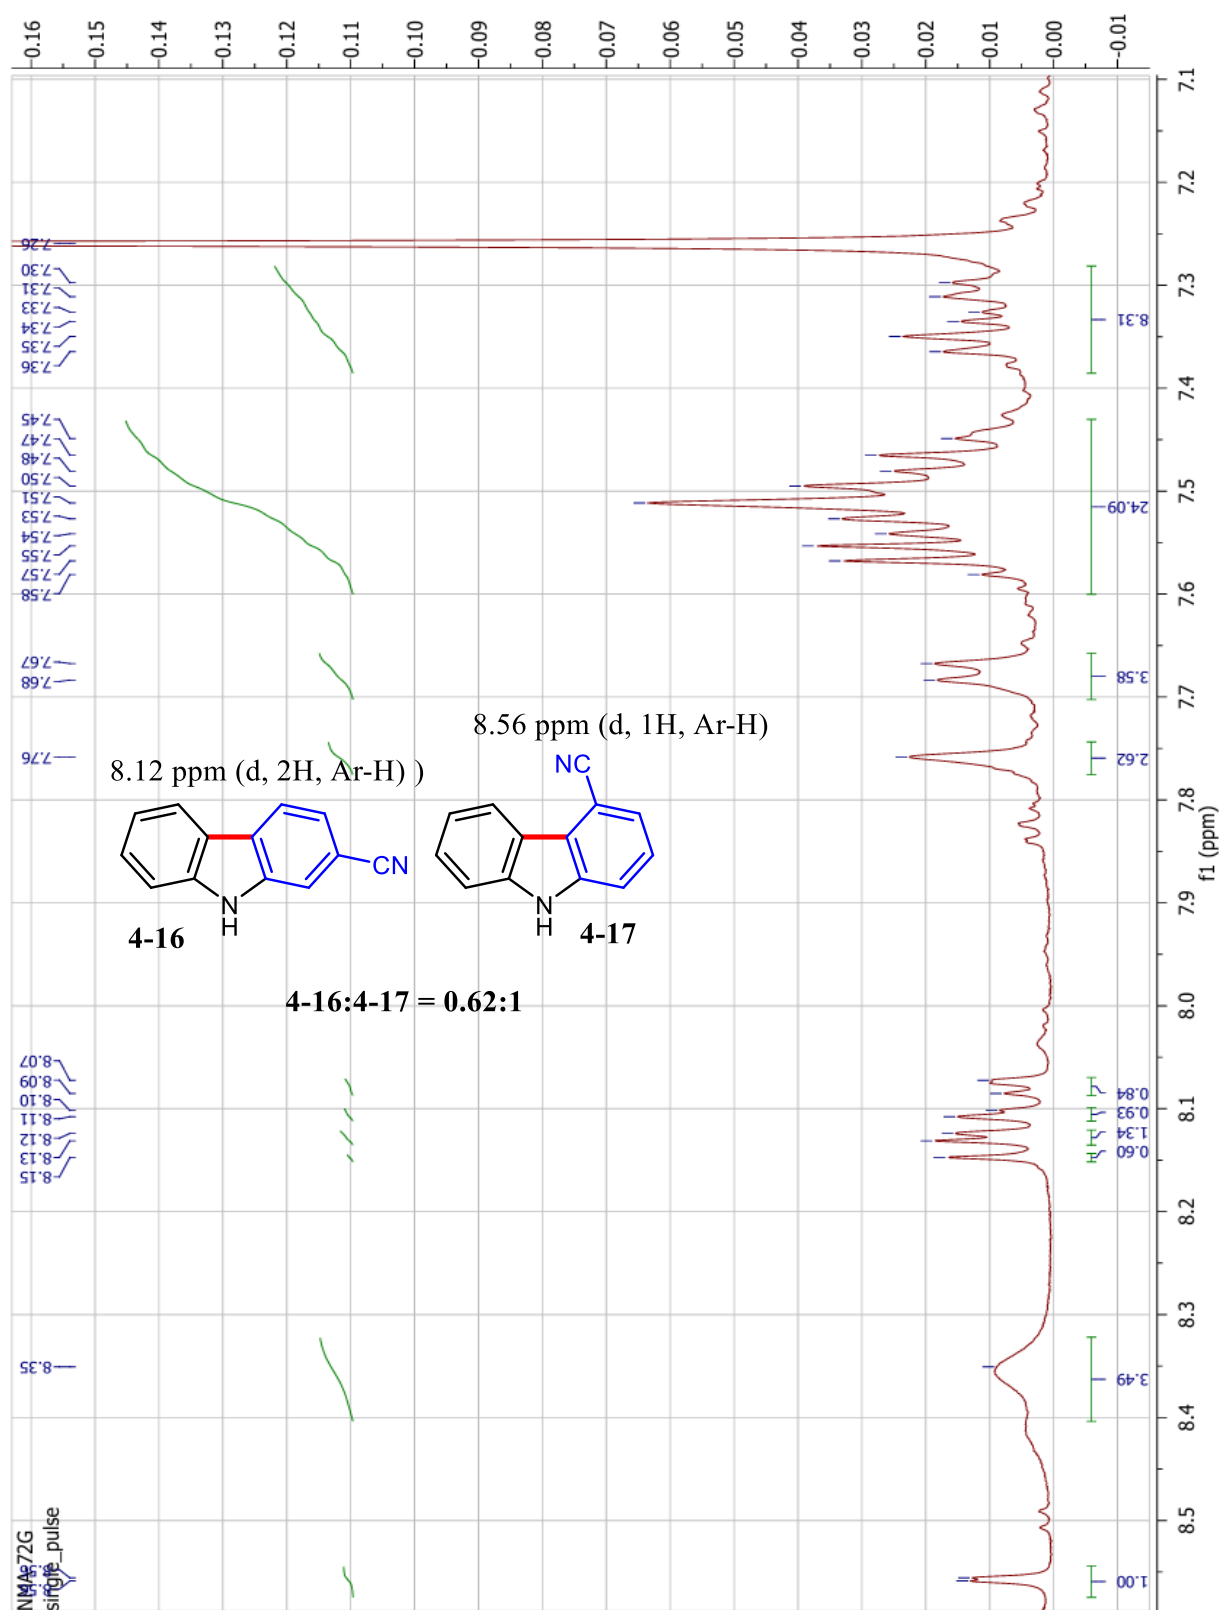



Chemical structure of compound 4-16: N#Cc1ccc(Nc2ccccc2)cc1

<sup>1</sup>H NMR spectrum (CDCl<sub>3</sub>) of compound 4-16. The spectrum shows peaks in the aromatic region (6.8-8.3 ppm) and a nitrile proton (7.5 ppm). Integration values are provided for several peaks.

| Chemical Shift (ppm) | Integration |
|----------------------|-------------|
| 8.286                | 1.1         |
| 8.283                |             |
| 8.148                |             |
| 8.132                |             |
| 8.124                |             |
| 8.109                |             |
| 7.755                | 2.0         |
| 7.529                |             |
| 7.514                |             |
| 7.506                |             |
| 7.498                |             |
| 7.491                |             |
| 7.328                | 1.0         |
| 7.327                |             |
| 7.313                |             |
| 7.299                |             |
| 7.258                |             |
| 7.500                | 3.0         |
| 7.500                | 1.0         |



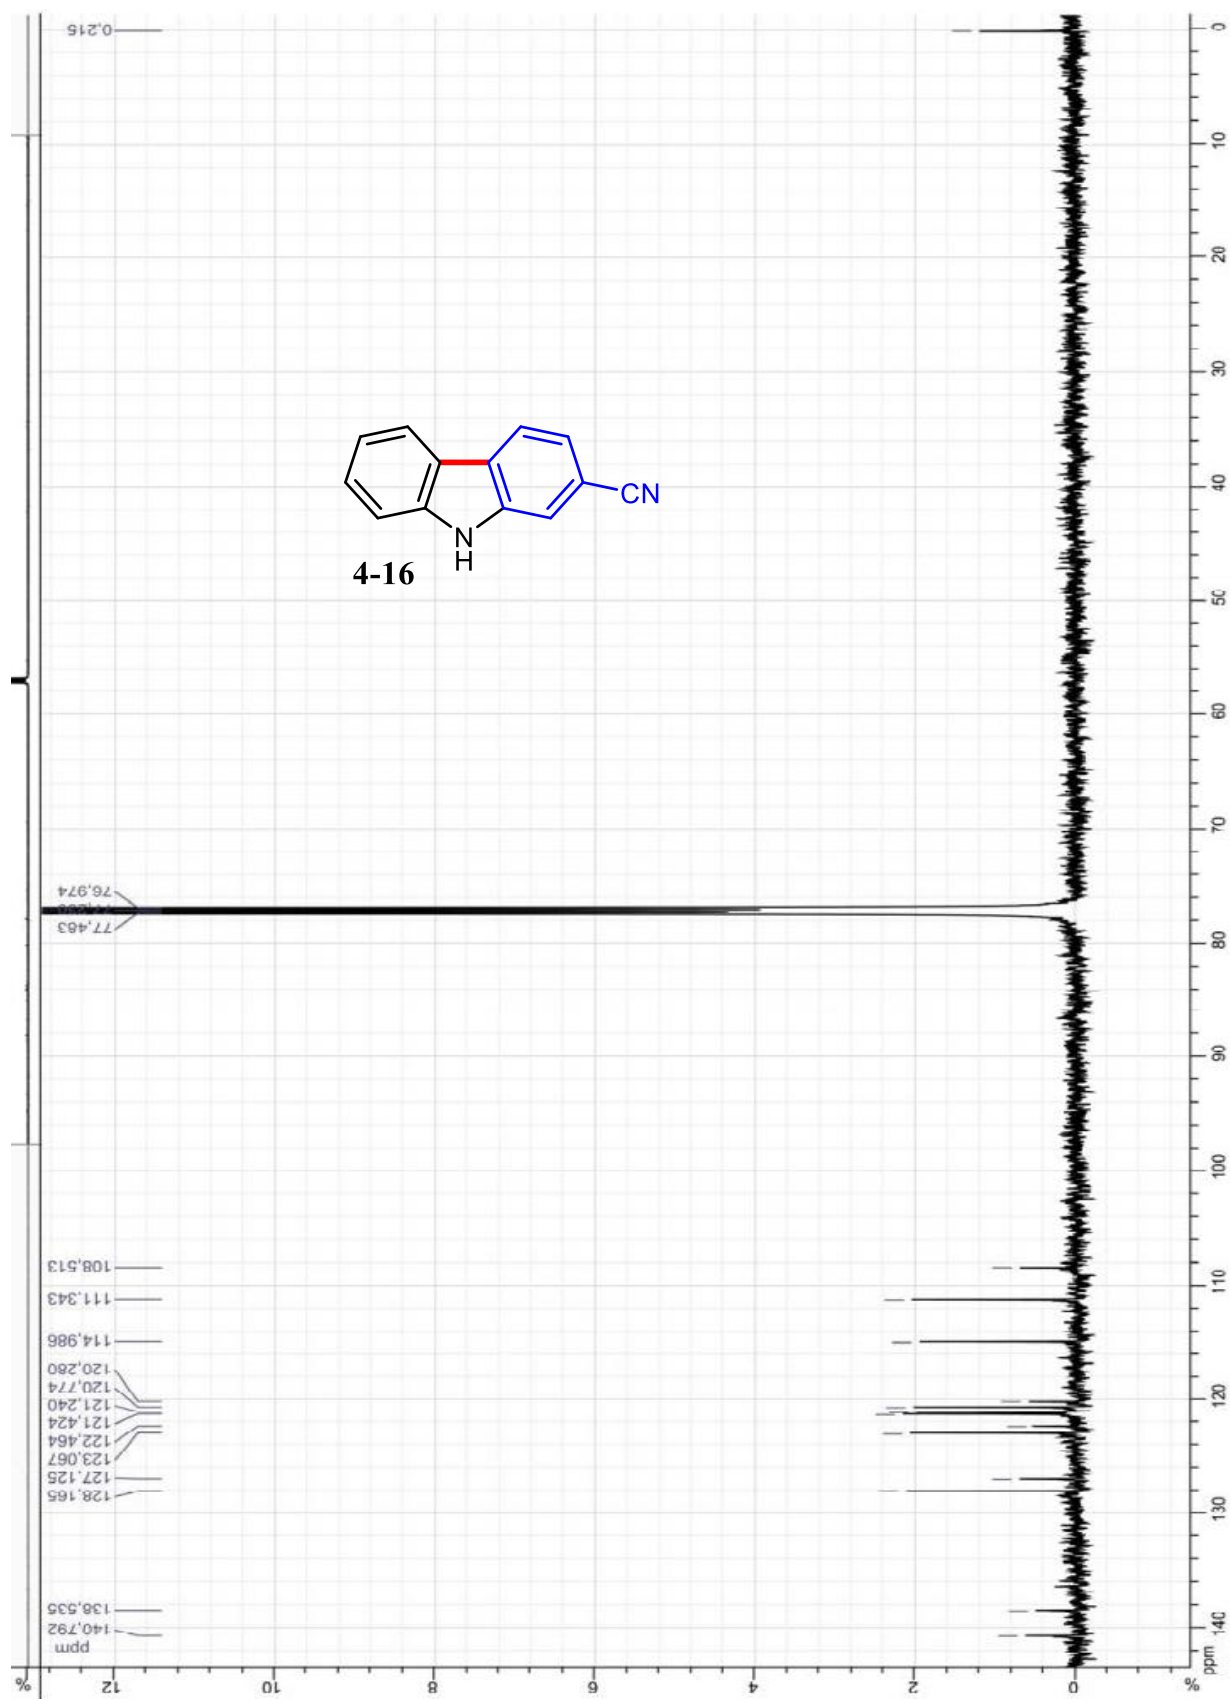

$^1\text{H}$  NMR and  $^{13}\text{C}$  NMR spectra of 9*H*-carbazole-2-carbonitrile (**4-17**) in Acetone- $\text{D}_6$

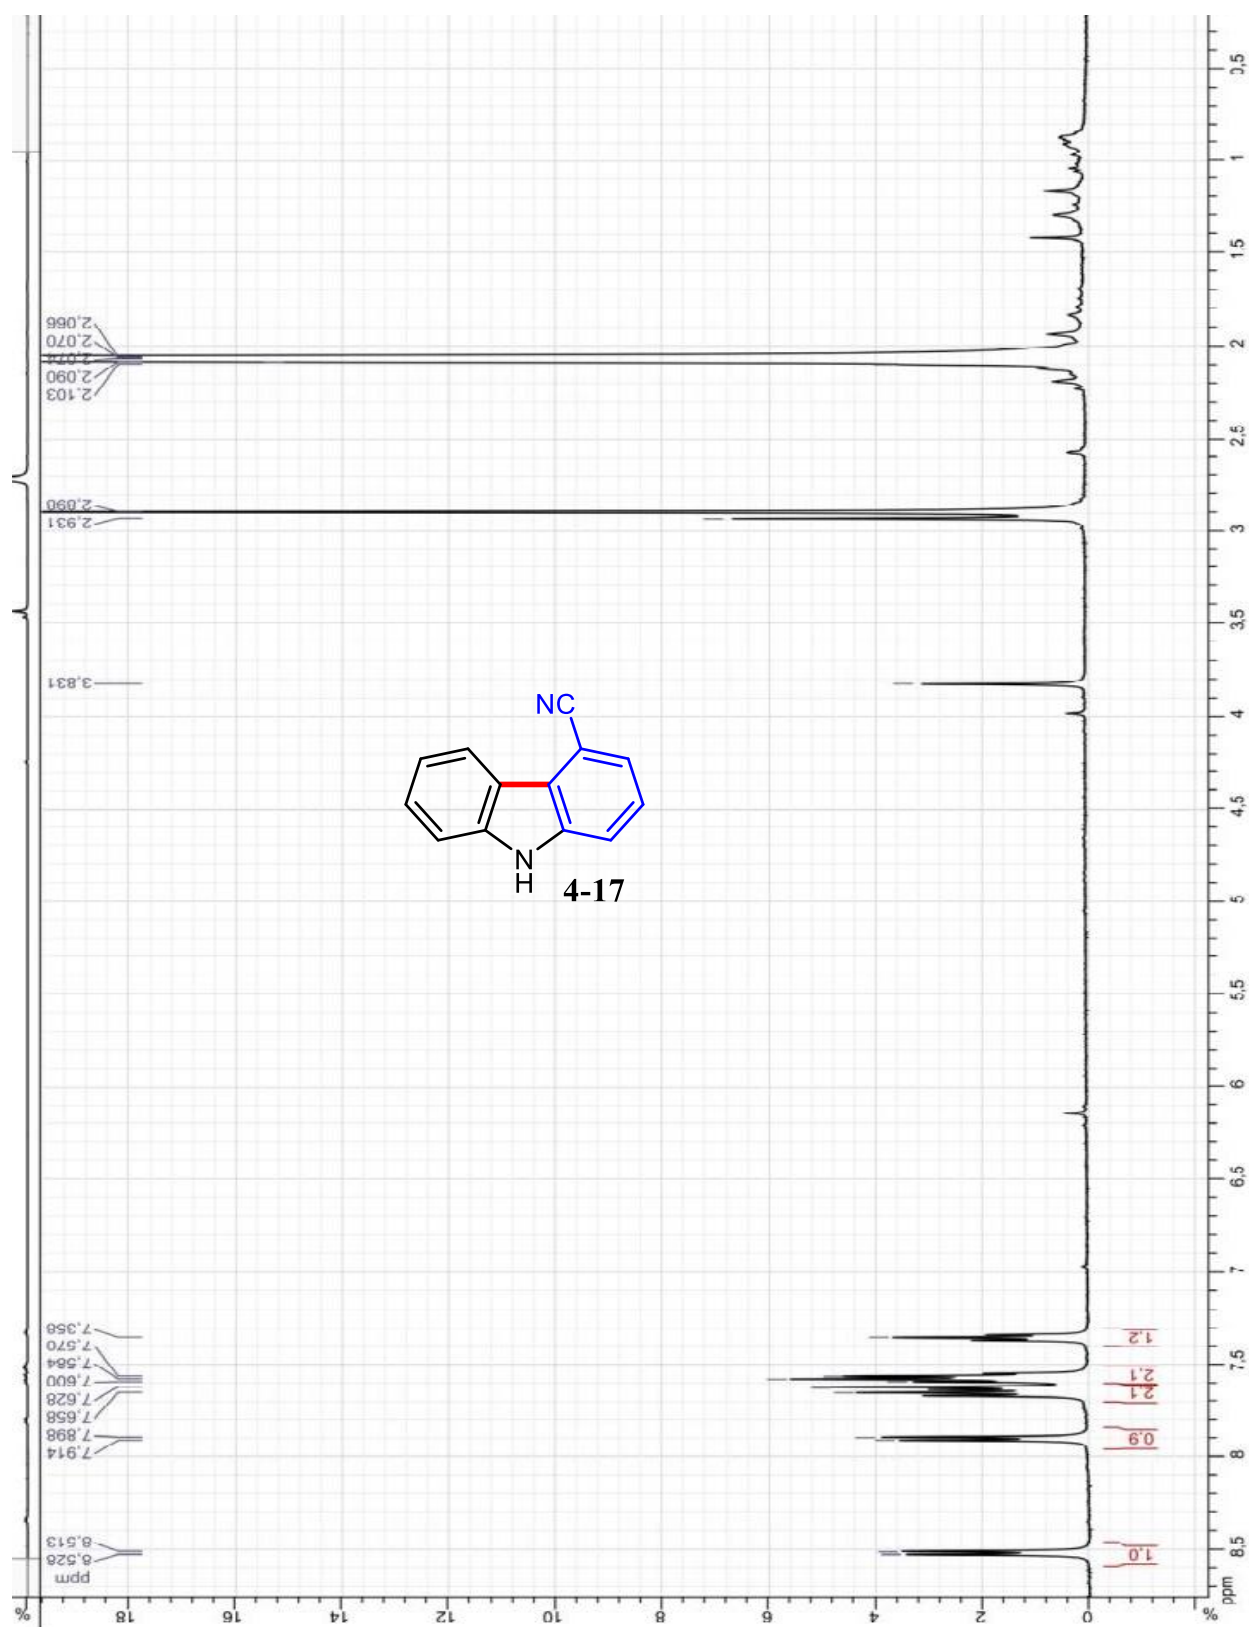

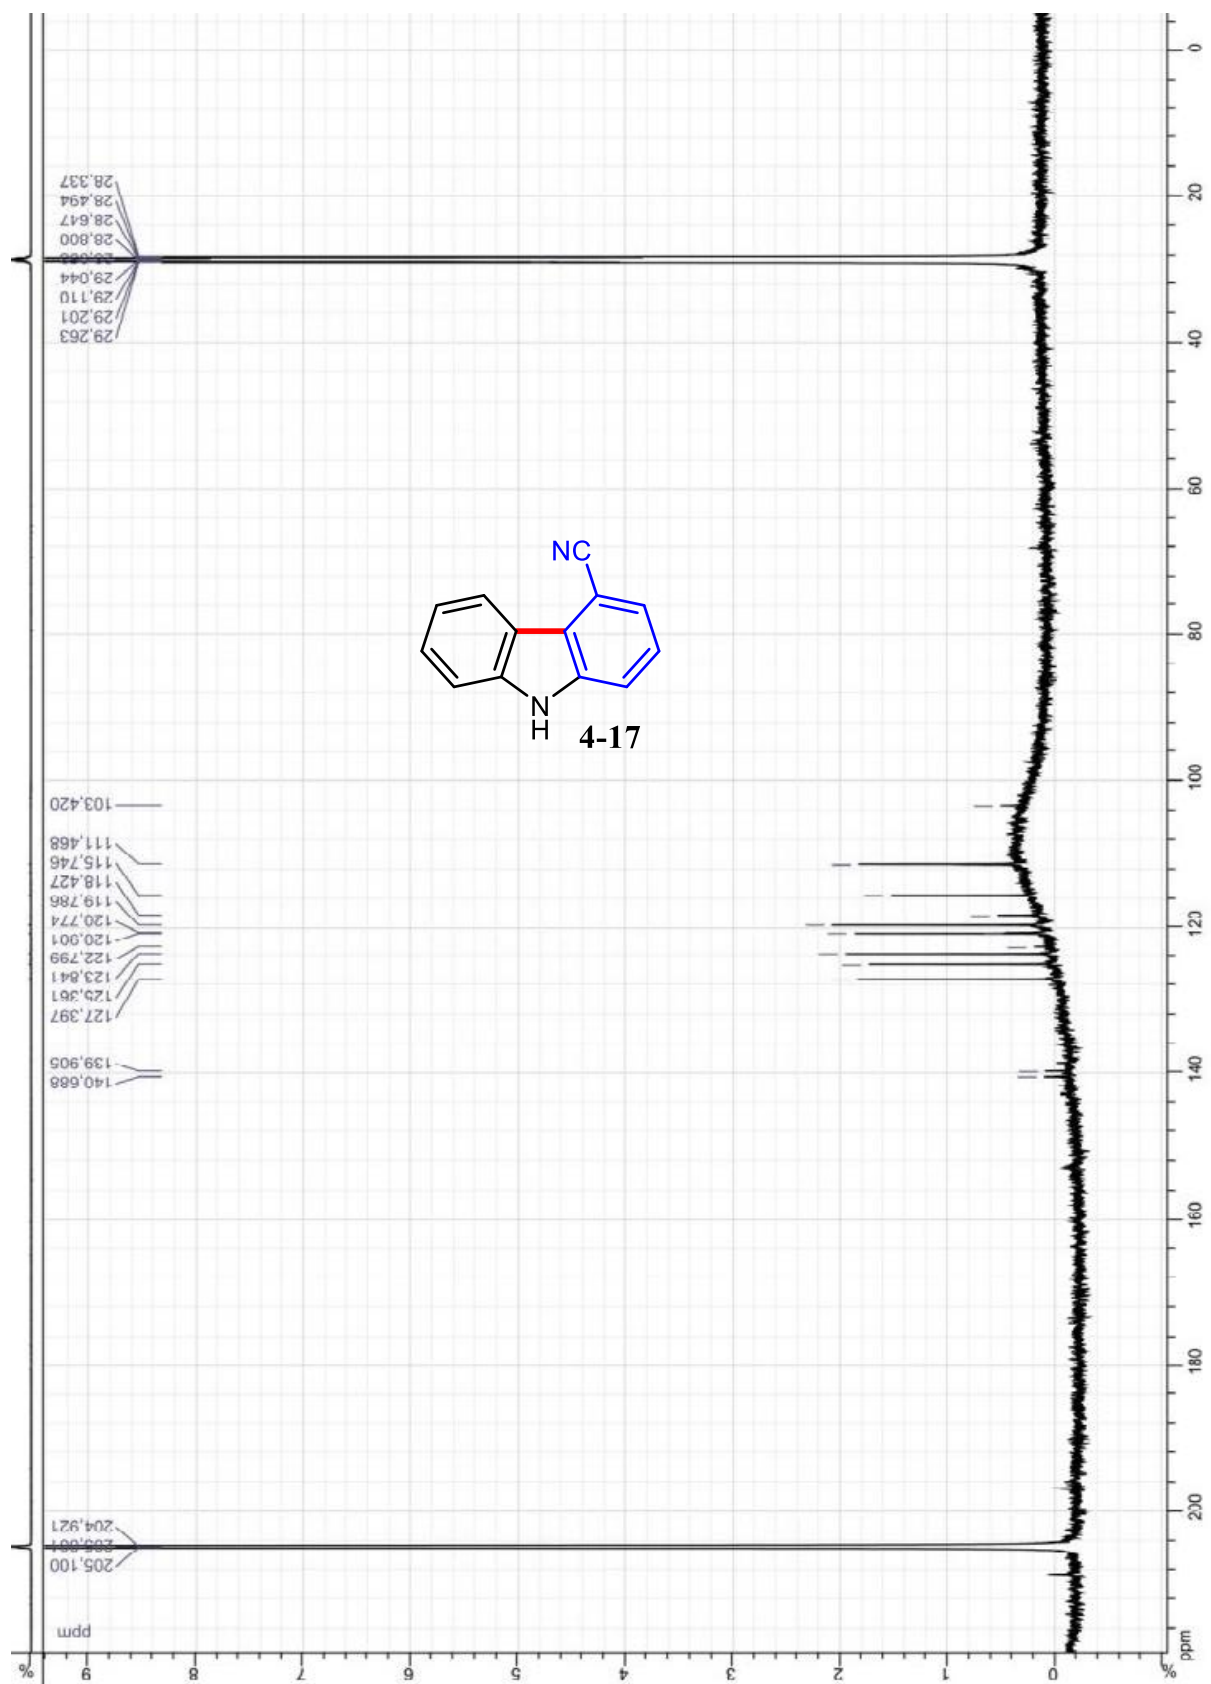

<sup>1</sup>H NMR (CDCl<sub>3</sub>) and LCMS data of the reaction mixture of **3ak** to get regioisomeric ratio (C2:C4) of **4-18** and **4-19**.

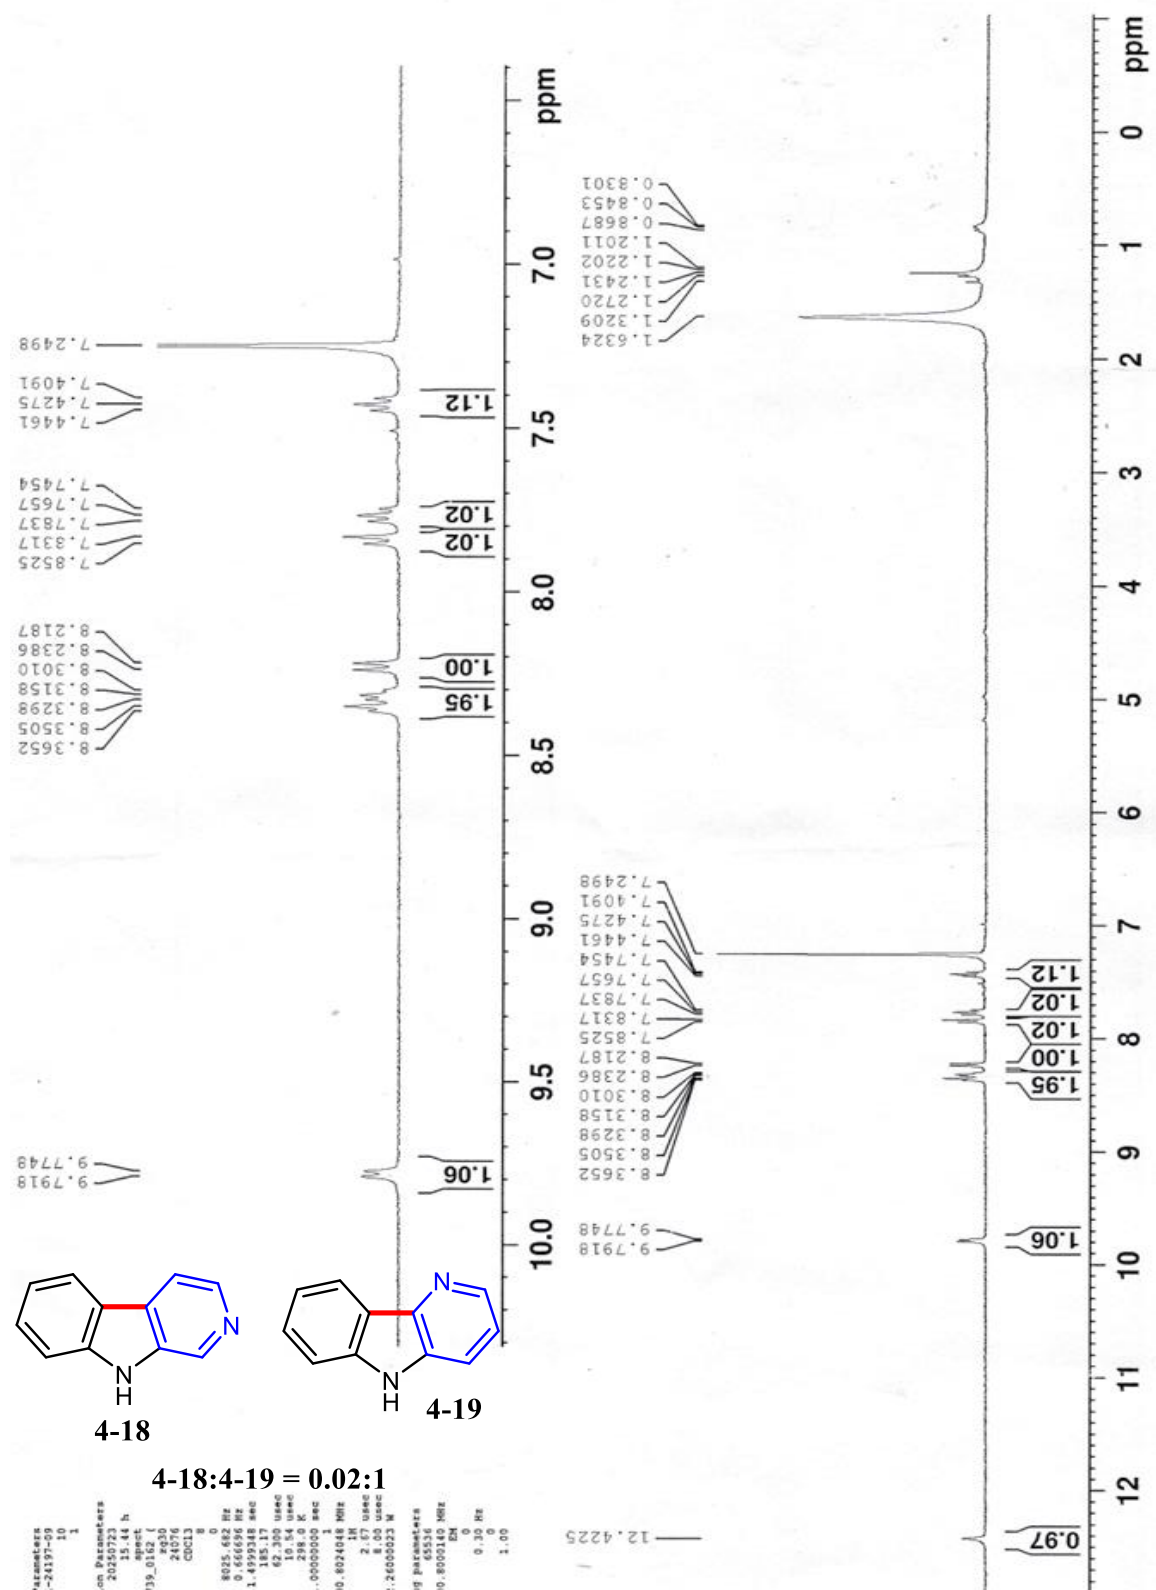

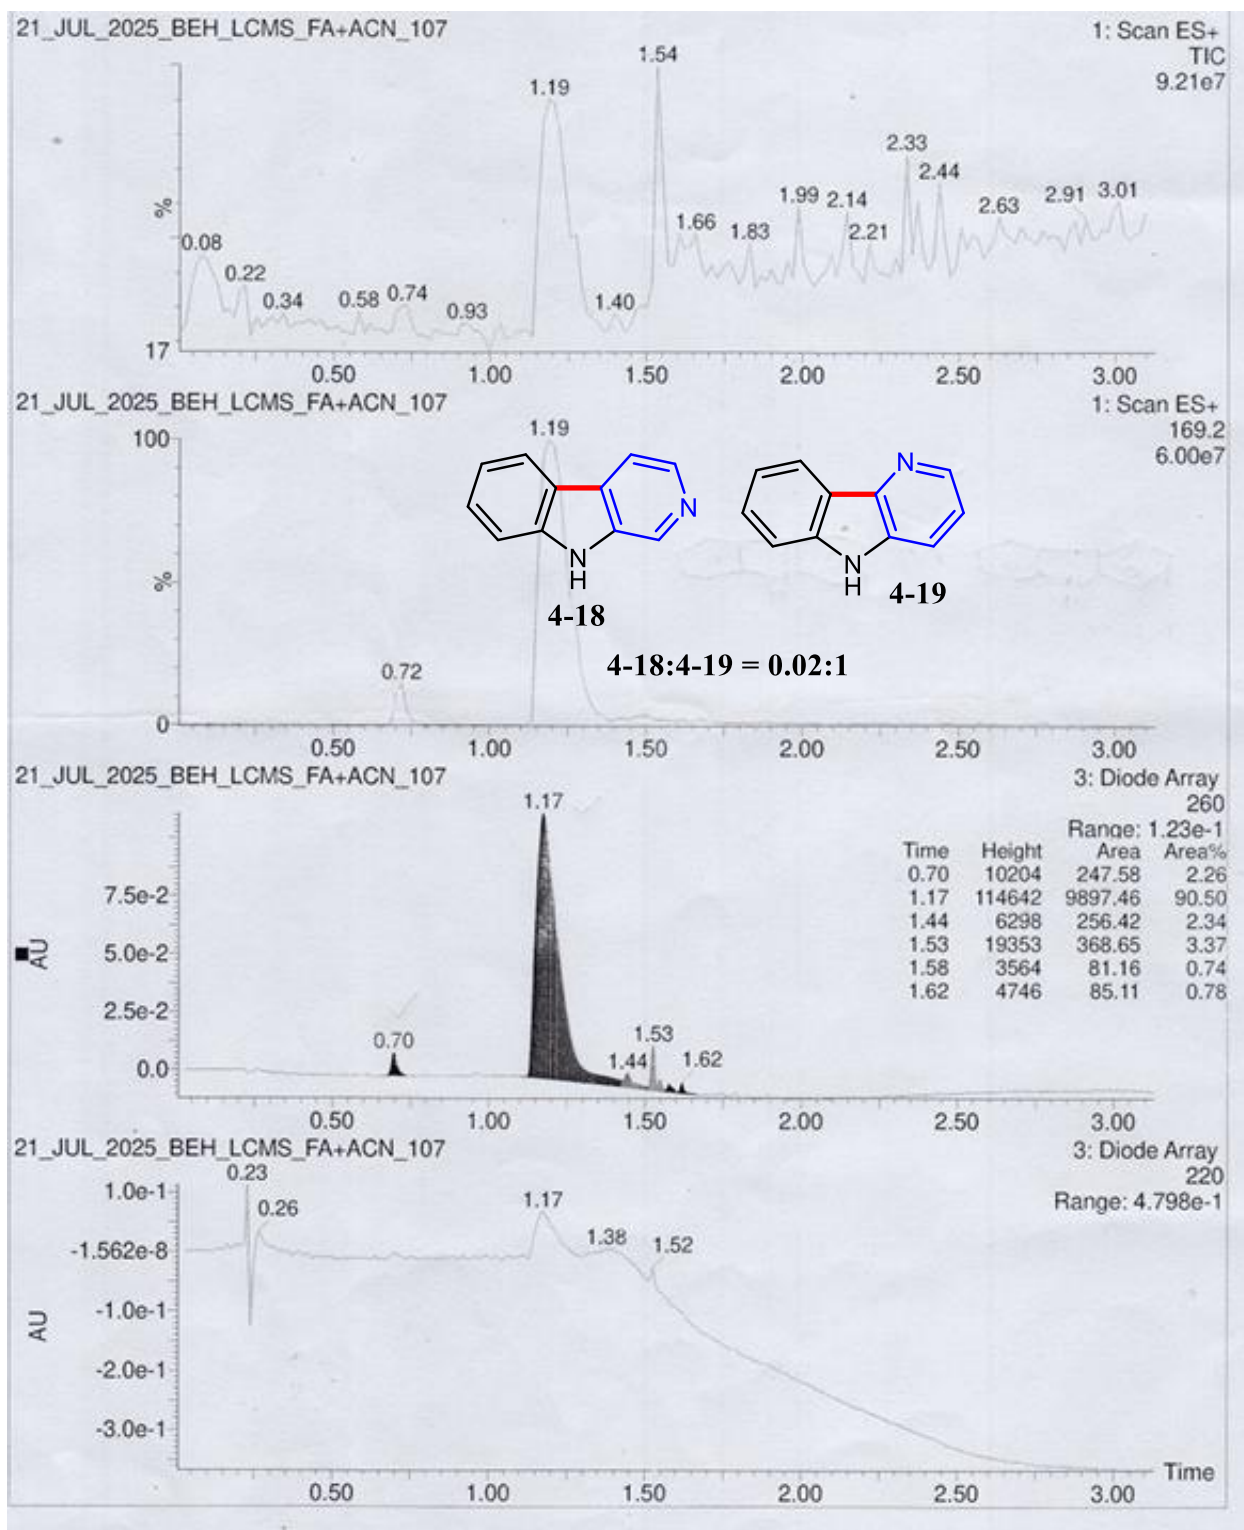



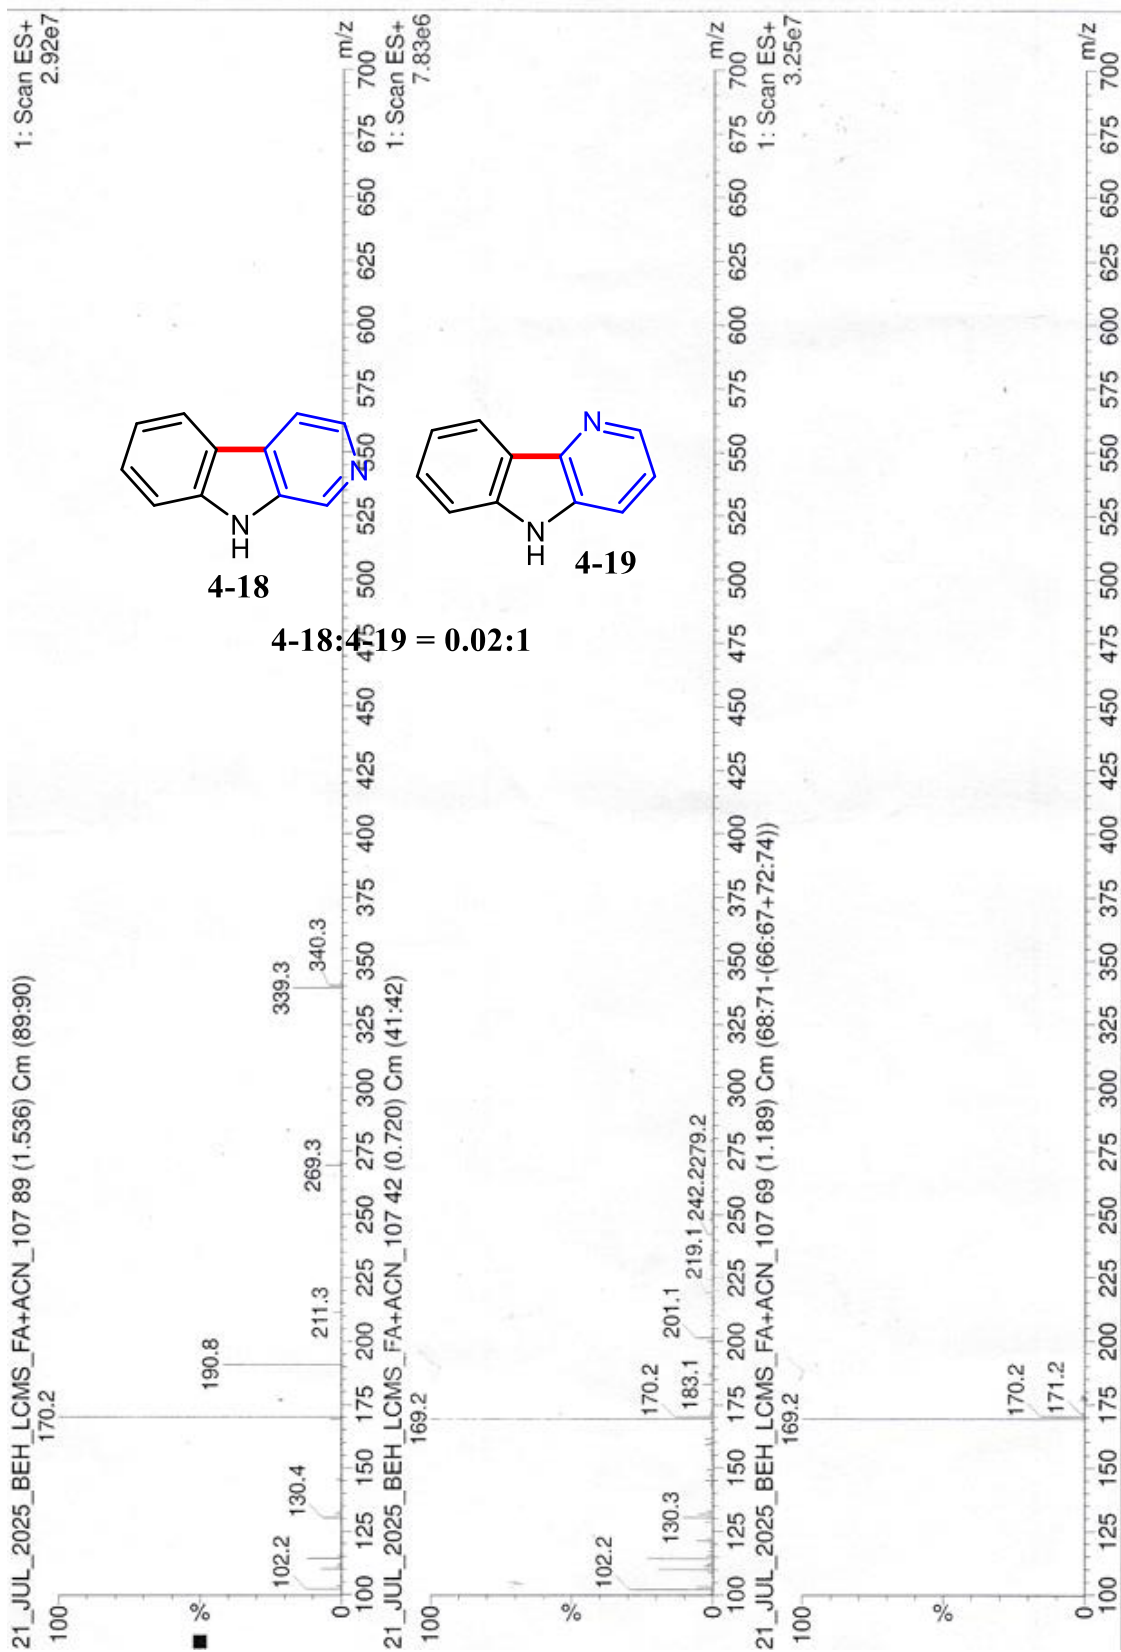

$^1\text{H}$  NMR and  $^{13}\text{C}$  NMR spectra of 9*H*-pyrido[3,4-*b*]indole (**4-18**) in  $\text{CDCl}_3$

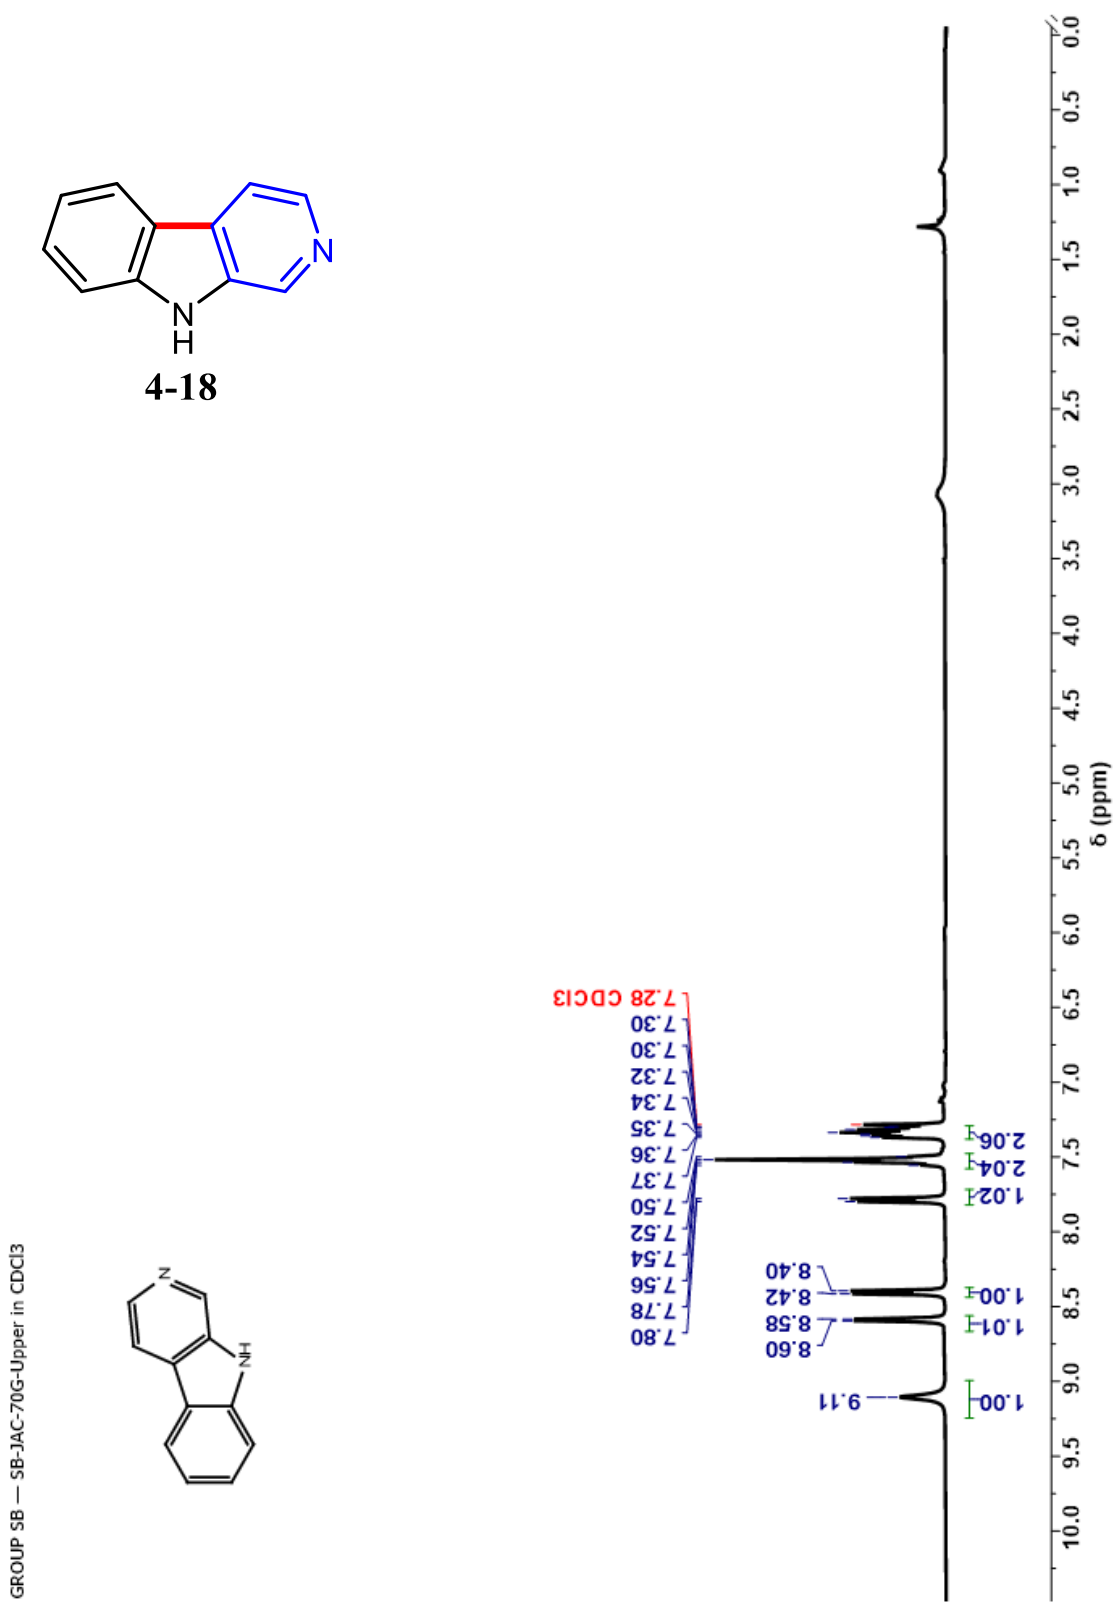

GROUP SB — SB-JAC-70G-Upper in CDCl3

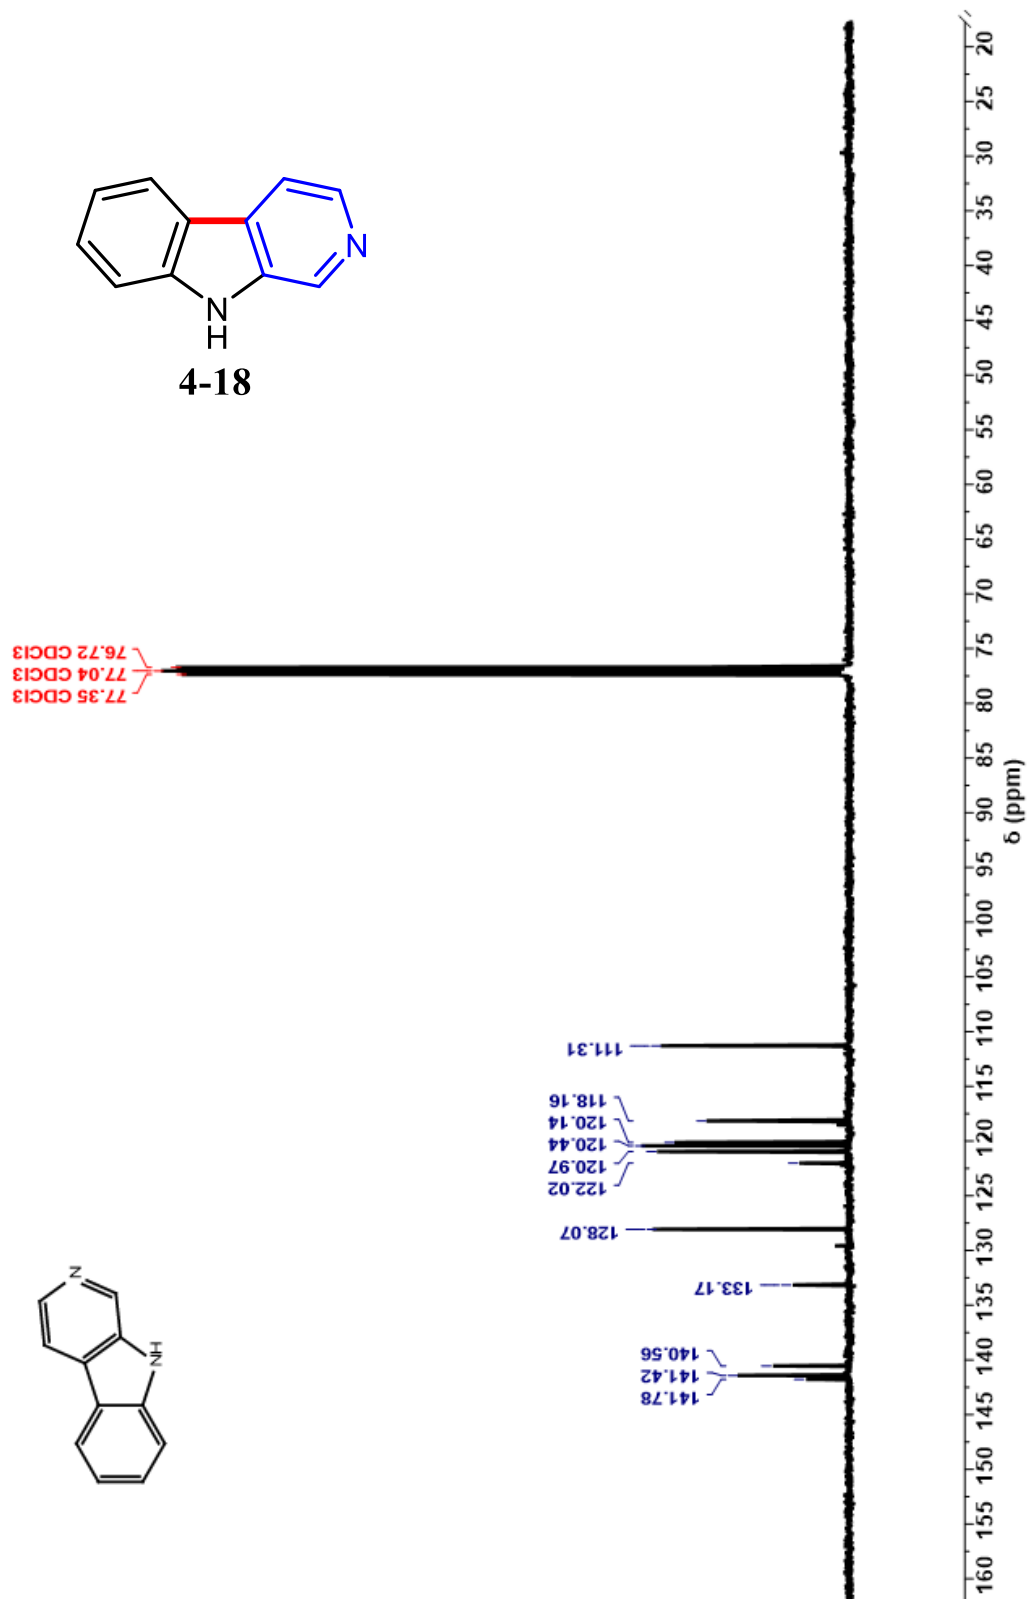



$^1\text{H}$  NMR and  $^{13}\text{C}$  NMR spectra of 5*H*-pyrido[3,2-*b*]indole (**4-19**) in  $\text{CDCl}_3$

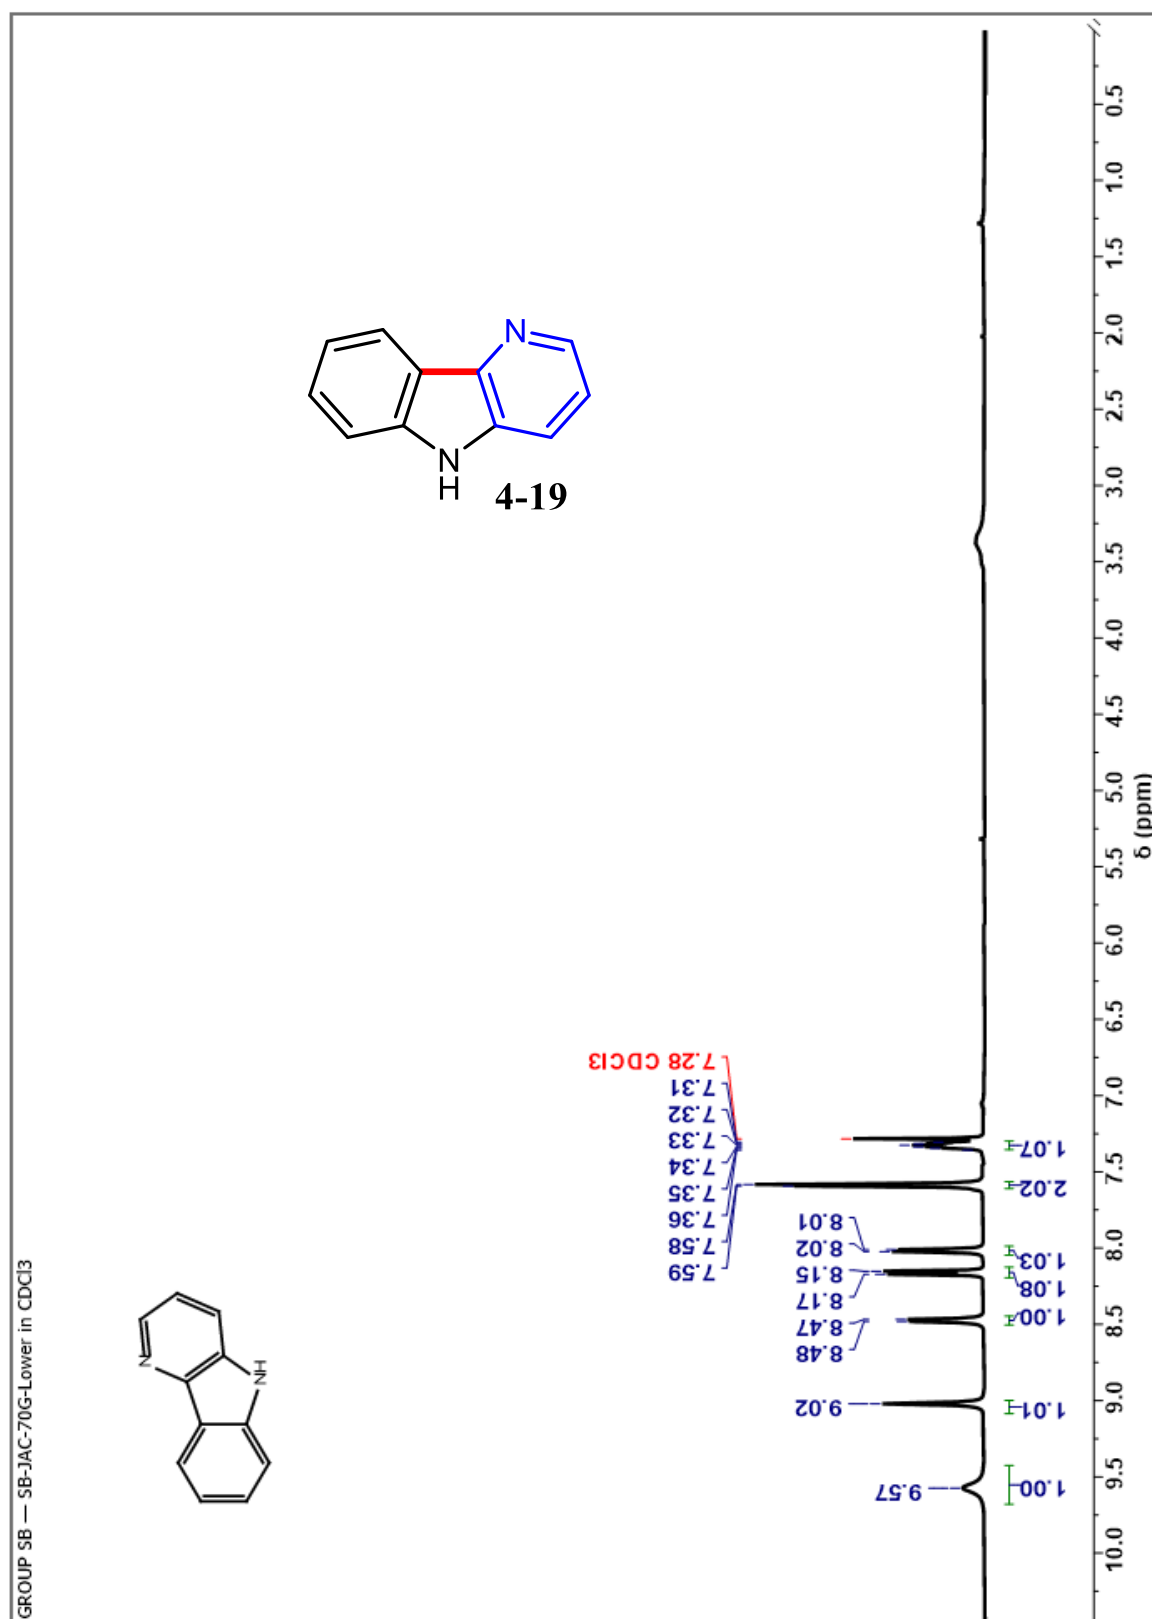

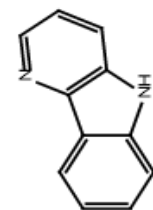

77.34 CDCl<sub>3</sub>  
77.03 CDCl<sub>3</sub>  
76.71 CDCl<sub>3</sub>

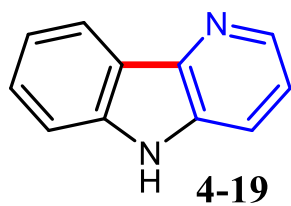

140.92  
137.92  
136.02  
133.01  
129.46  
128.86  
121.86  
121.28  
120.25  
114.96  
111.84

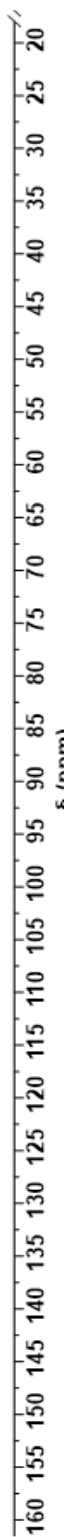

$^1\text{H}$  NMR and  $^{13}\text{C}$  NMR spectra of 2-methyl-9*H*-carbazole (**4-10**) (from the reaction of **3al**) in  $\text{CDCl}_3$

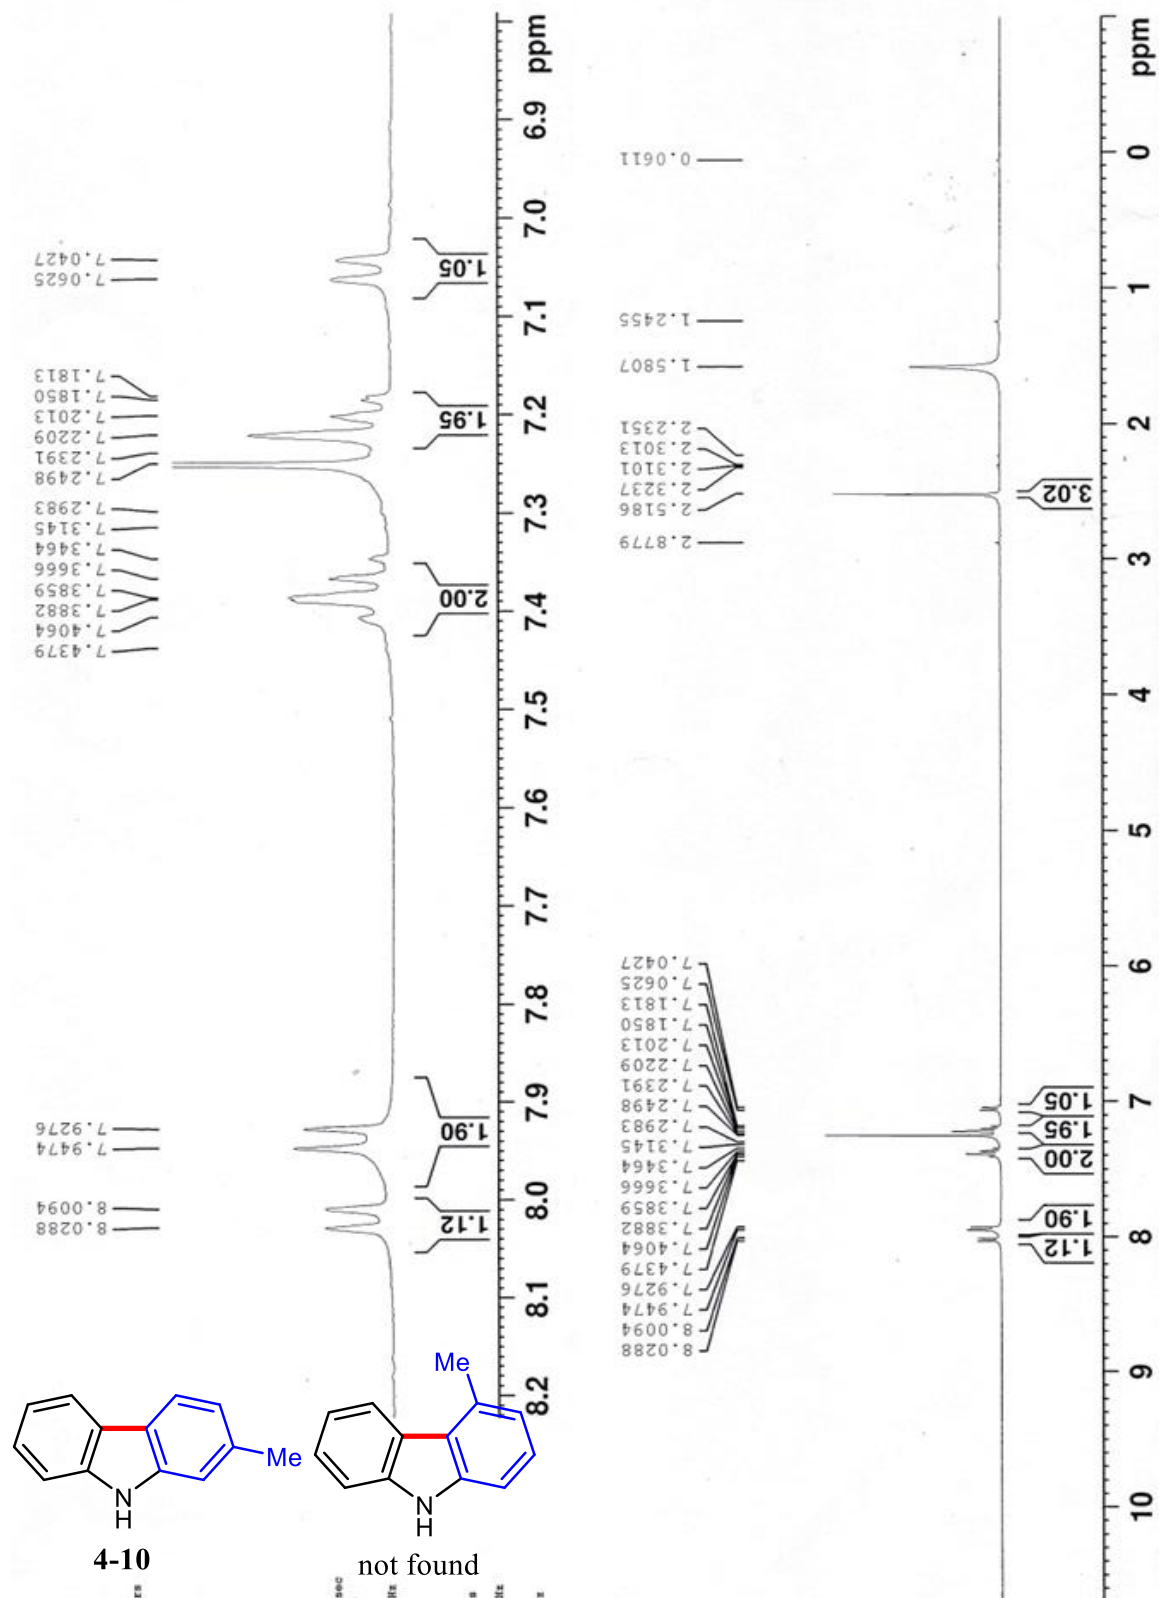

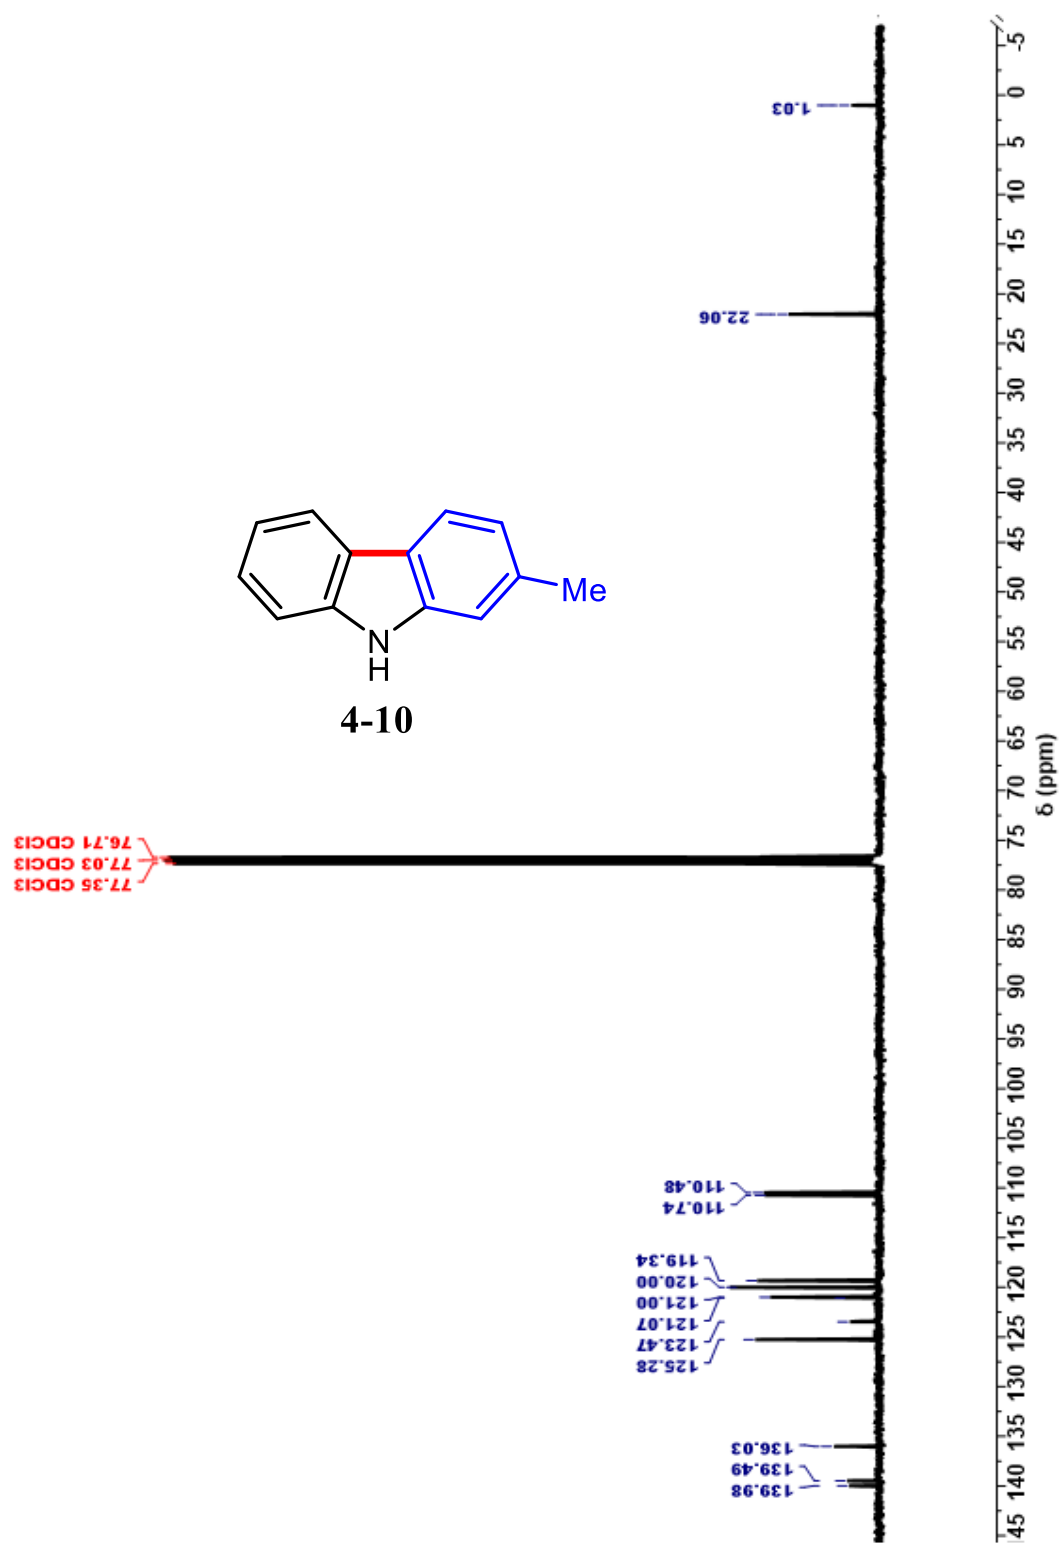

$^1\text{H}$  NMR and  $^{13}\text{C}$  NMR spectra of 1-nitro-9*H*-carbazole (**4-20**) in  $\text{CDCl}_3$

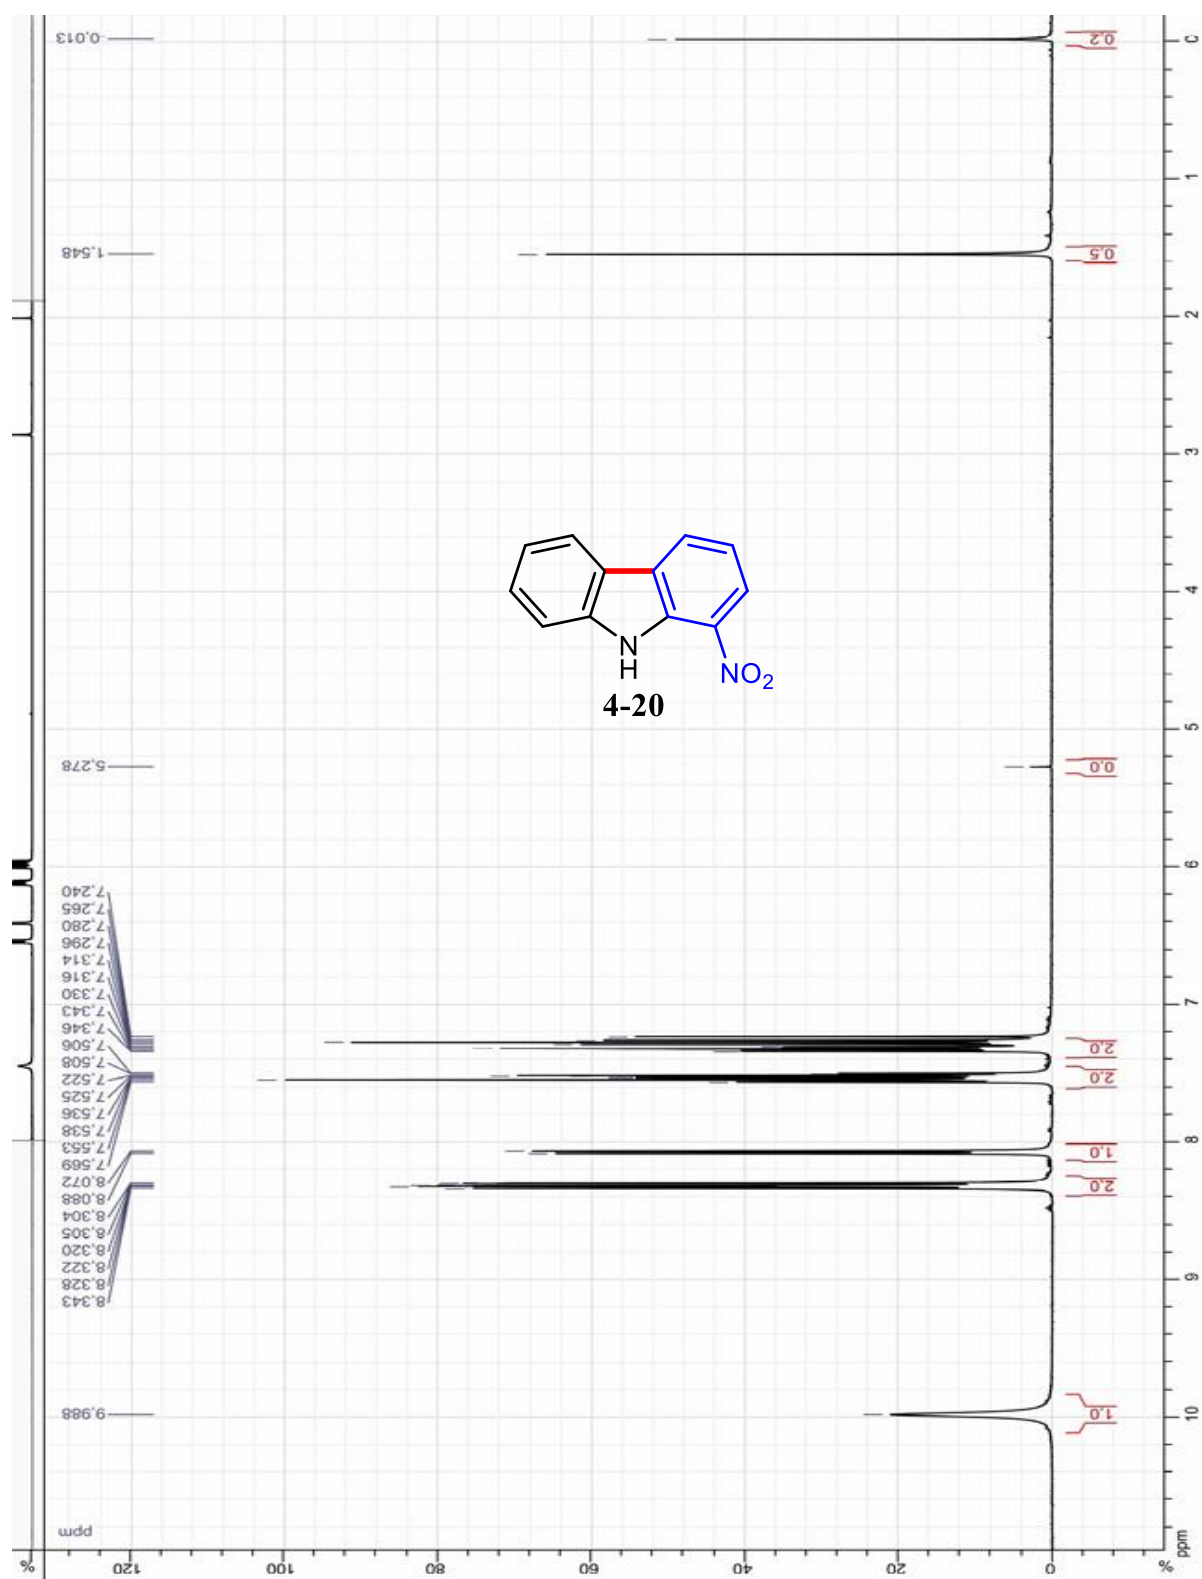

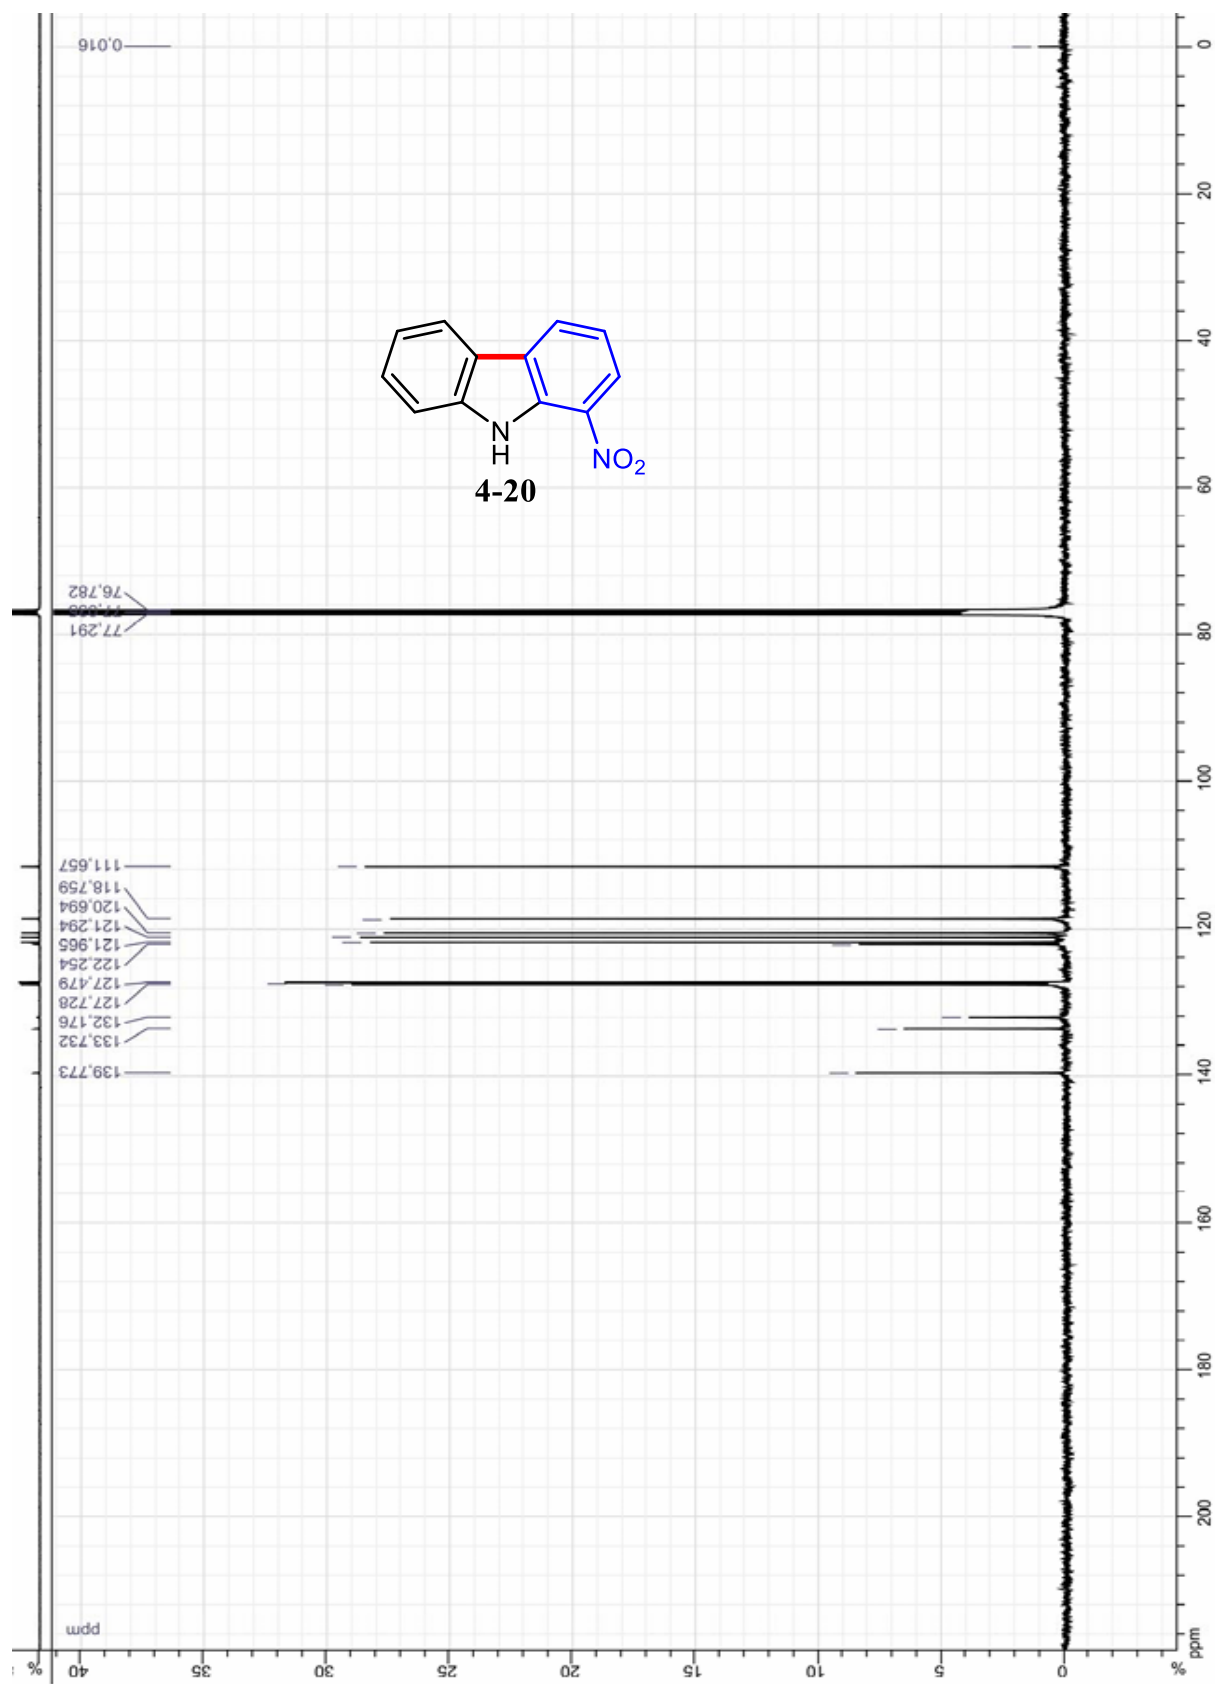

$^1\text{H}$  NMR and  $^{13}\text{C}$  NMR spectra of 1-methyl-9*H*-carbazole (**4-21**) in  $\text{CDCl}_3$

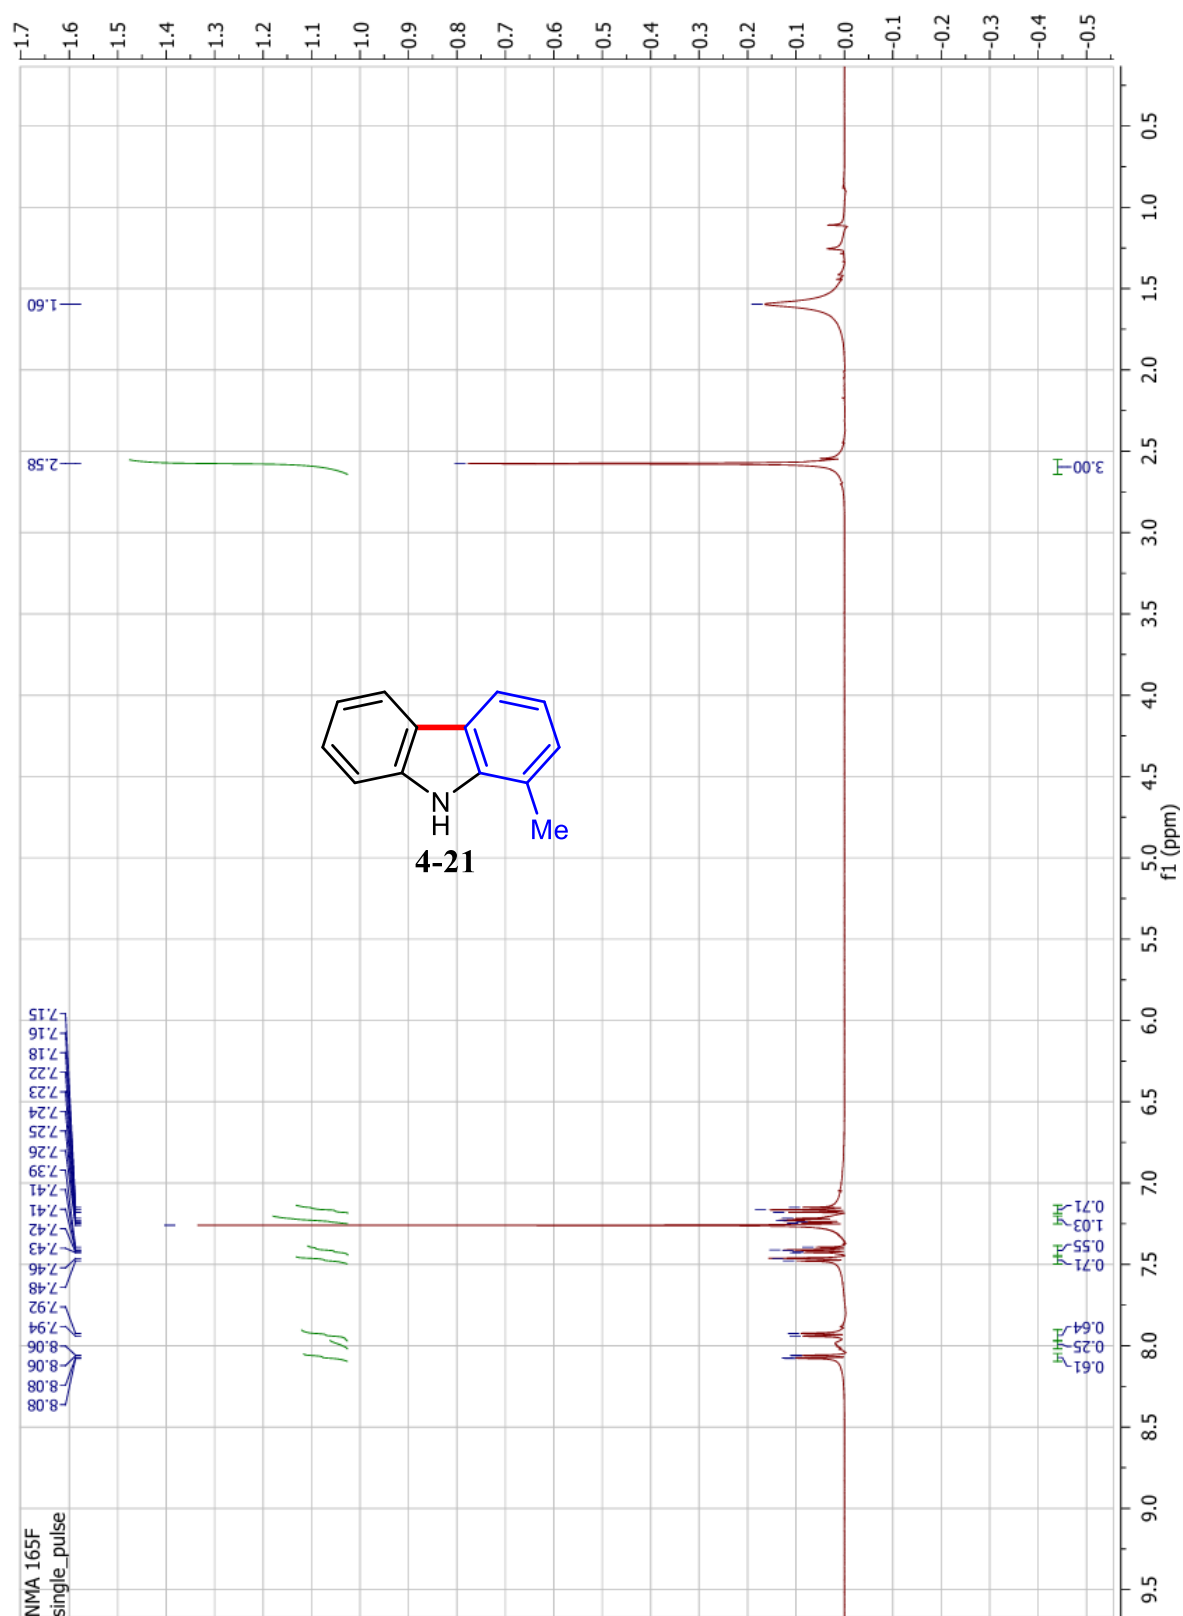

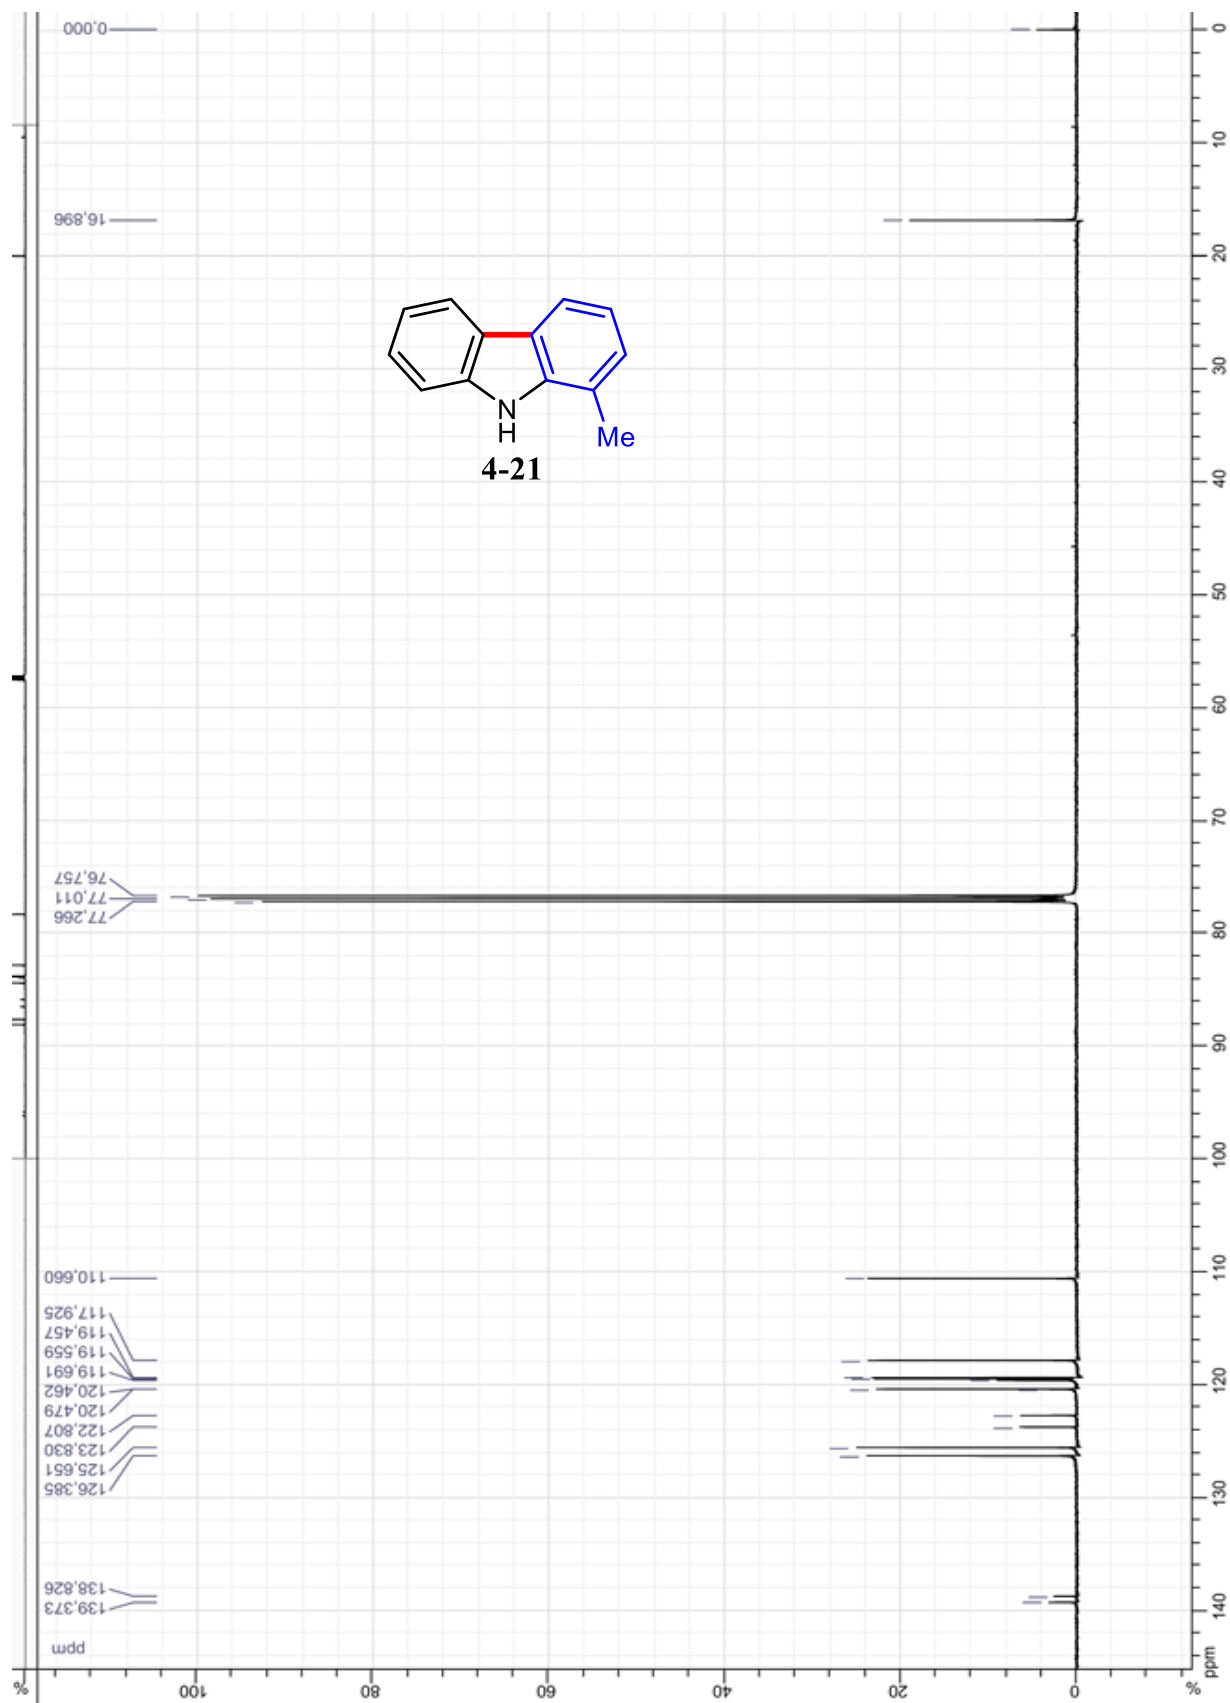

S180



$^1\text{H}$  NMR and  $^{13}\text{C}$  NMR spectra of 9*H*-carbazole-3-carbaldehyde (**4-22**) in  $\text{CDCl}_3$

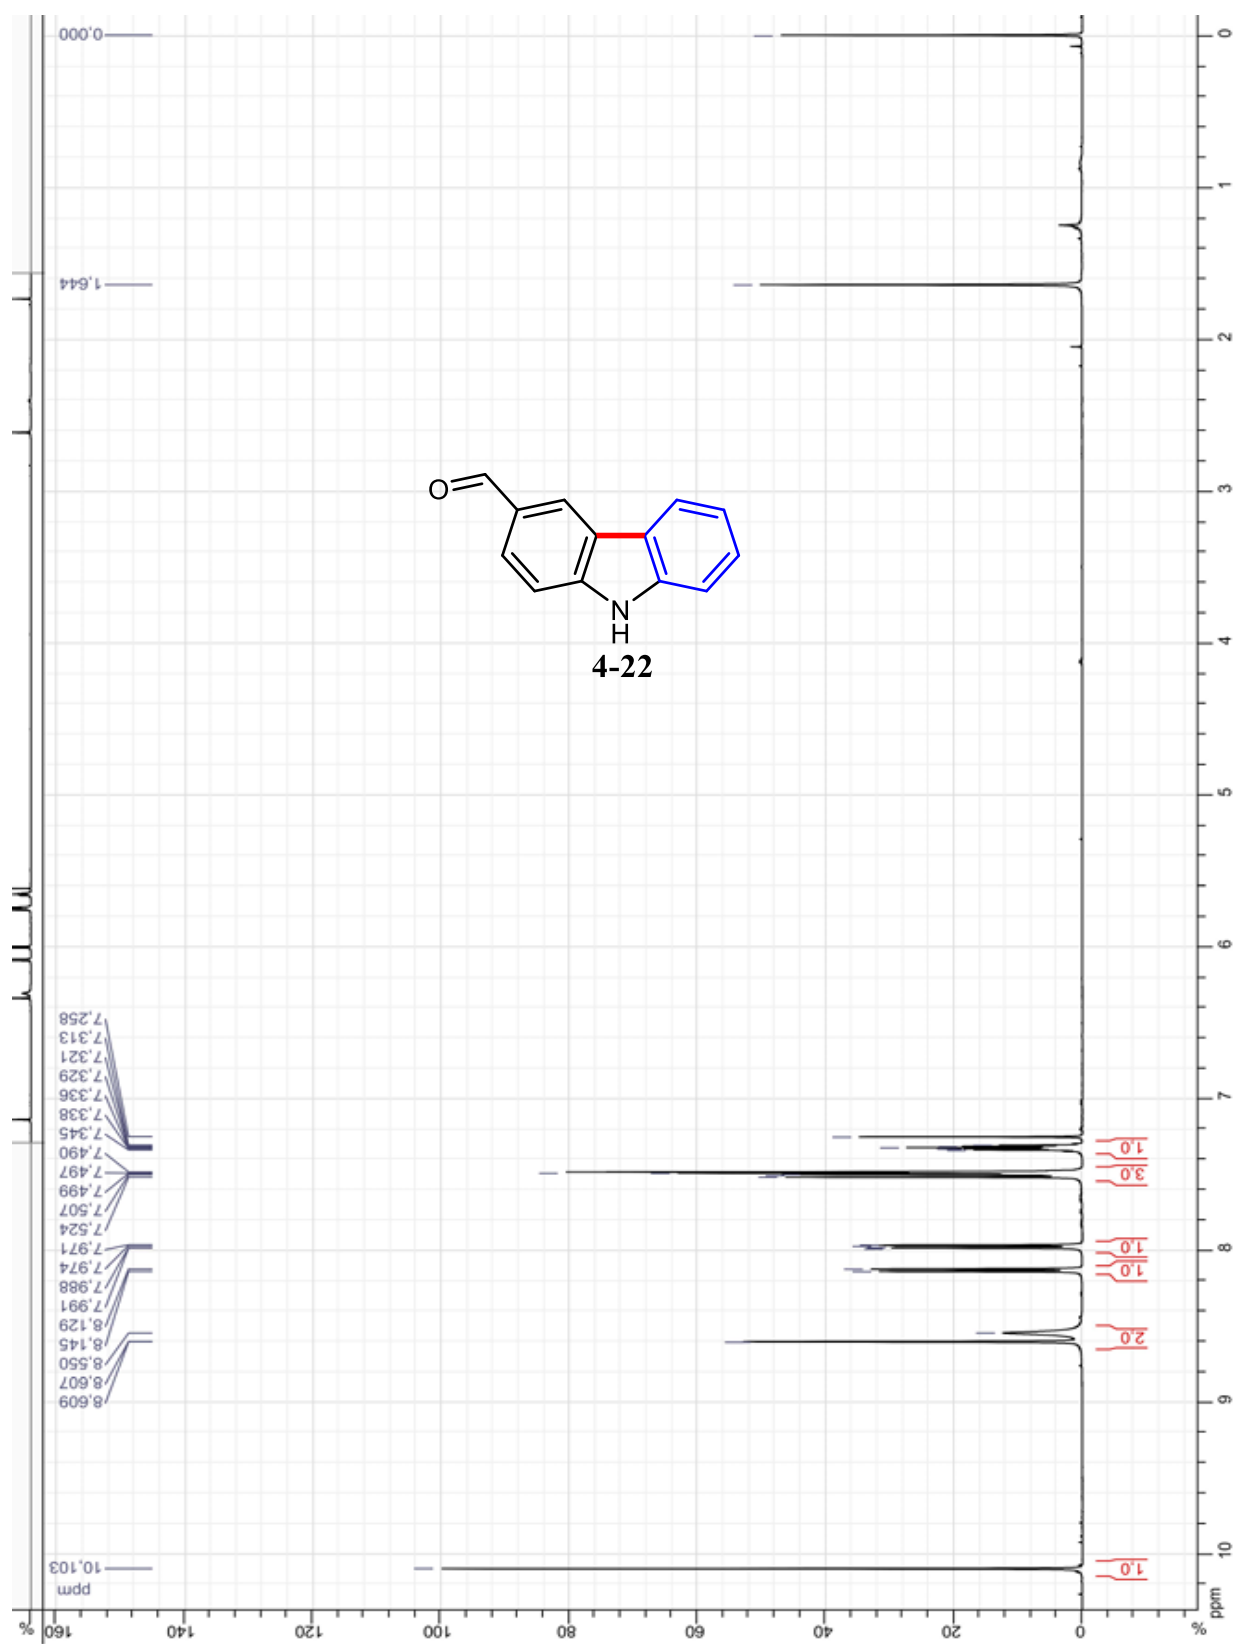

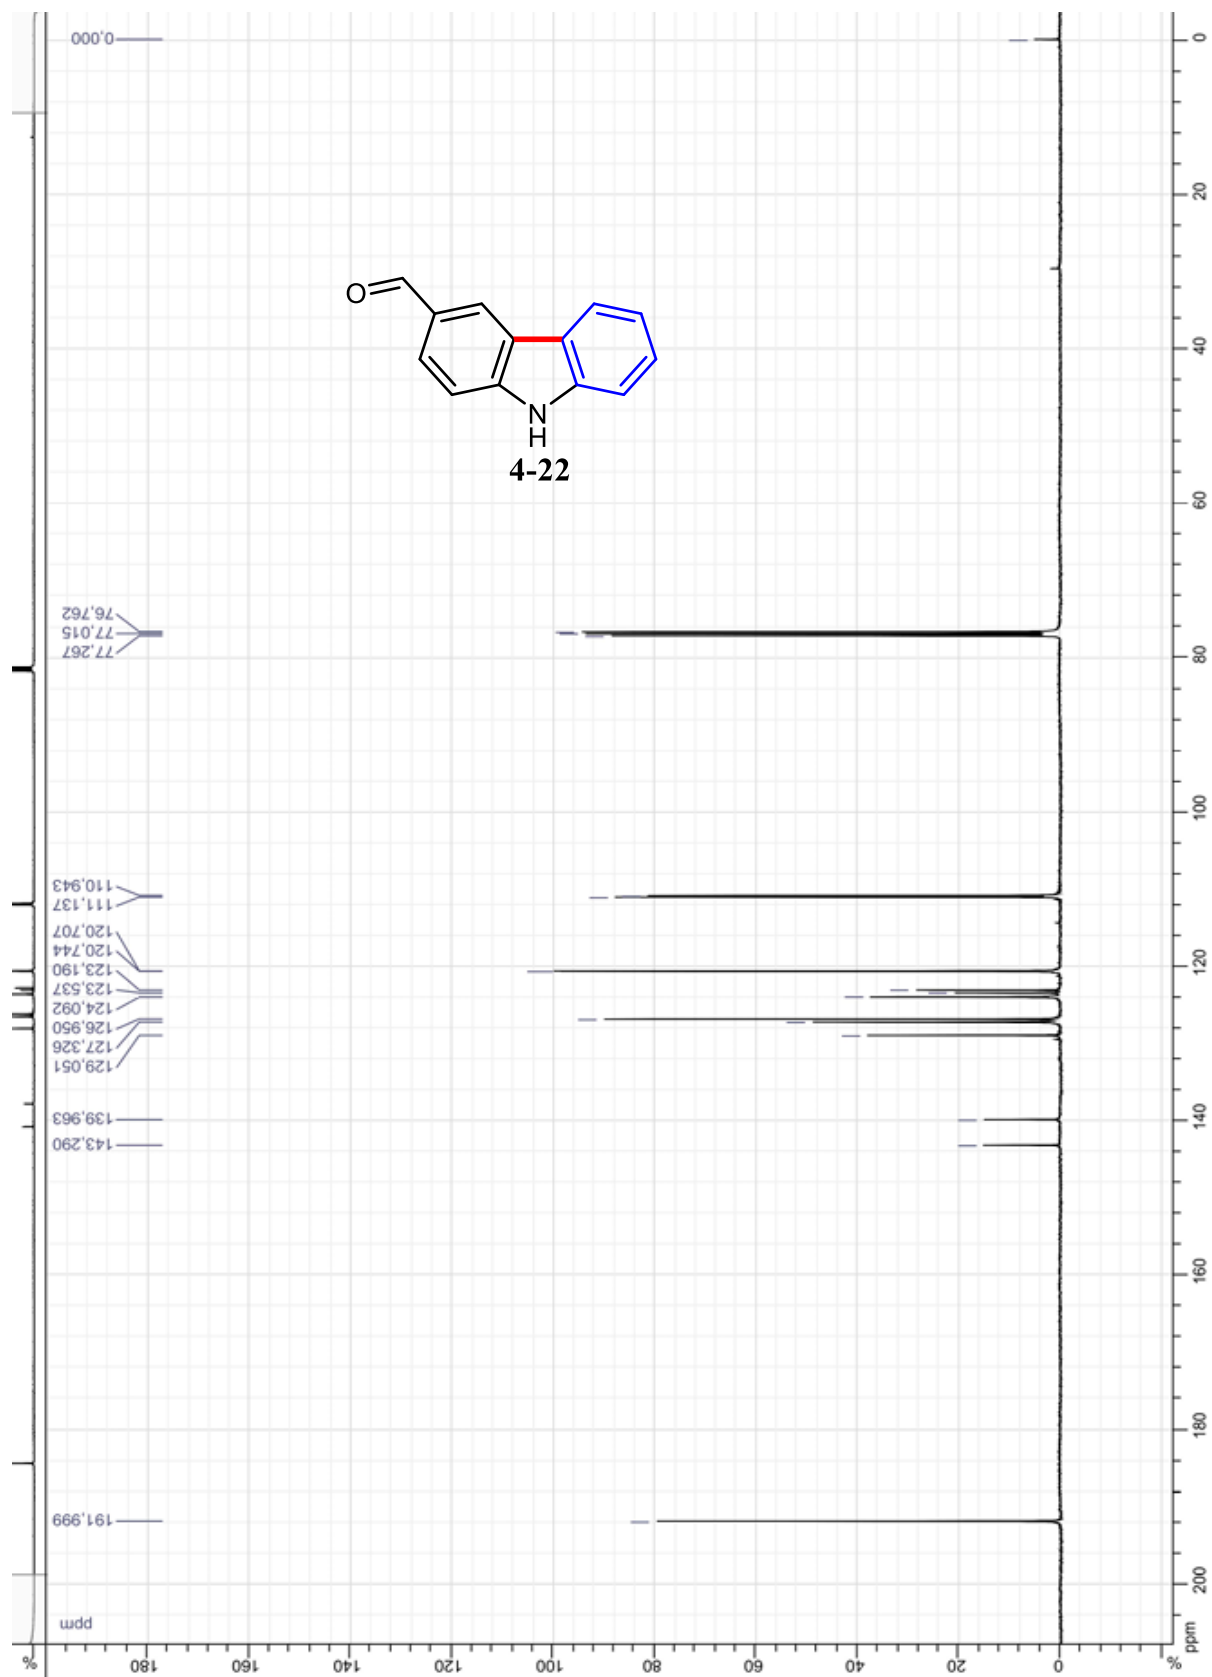

Chemical structure of 4-(2-phenyl-1H-indol-3-yl)acetamide (4-23) is shown above the spectrum.

<sup>1</sup>H NMR spectrum (CDCl<sub>3</sub>) of 4-23. The x-axis represents chemical shift in ppm (0 to 10), and the y-axis represents intensity in %.

Peak list (ppm):

- 9.66, 9.68, 9.70, 9.73, 9.75, 9.77, 9.78, 9.86, 9.87, 9.88, 9.89, 9.90, 9.91, 9.92, 9.93, 9.94, 9.95, 9.96, 9.97, 9.98, 9.99, 10.00, 10.01, 10.02, 10.03, 10.04, 10.05, 10.06, 10.07, 10.08, 10.09, 10.10, 10.11, 10.12, 10.13, 10.14, 10.15, 10.16, 10.17, 10.18, 10.19, 10.20, 10.21, 10.22, 10.23, 10.24, 10.25, 10.26, 10.27, 10.28, 10.29, 10.30, 10.31, 10.32, 10.33, 10.34, 10.35, 10.36, 10.37, 10.38, 10.39, 10.40, 10.41, 10.42, 10.43, 10.44, 10.45, 10.46, 10.47, 10.48, 10.49, 10.50, 10.51, 10.52, 10.53, 10.54, 10.55, 10.56, 10.57, 10.58, 10.59, 10.60, 10.61, 10.62, 10.63, 10.64, 10.65, 10.66, 10.67, 10.68, 10.69, 10.70, 10.71, 10.72, 10.73, 10.74, 10.75, 10.76, 10.77, 10.78, 10.79, 10.80, 10.81, 10.82, 10.83, 10.84, 10.85, 10.86, 10.87, 10.88, 10.89, 10.90, 10.91, 10.92, 10.93, 10.94, 10.95, 10.96, 10.97, 10.98, 10.99, 11.00, 11.01, 11.02, 11.03, 11.04, 11.05, 11.06, 11.07, 11.08, 11.09, 11.10, 11.11, 11.12, 11.13, 11.14, 11.15, 11.16, 11.17, 11.18, 11.19, 11.20, 11.21, 11.22, 11.23, 11.24, 11.25, 11.26, 11.27, 11.28, 11.29, 11.30, 11.31, 11.32, 11.33, 11.34, 11.35, 11.36, 11.37, 11.38, 11.39, 11.40, 11.41, 11.42, 11.43, 11.44, 11.45, 11.46, 11.47, 11.48, 11.49, 11.50, 11.51, 11.52, 11.53, 11.54, 11.55, 11.56, 11.57, 11.58, 11.59, 11.60, 11.61, 11.62, 11.63, 11.64, 11.65, 11.66, 11.67, 11.68, 11.69, 11.70, 11.71, 11.72, 11.73, 11.74, 11.75, 11.76, 11.77, 11.78, 11.79, 11.80, 11.81, 11.82, 11.83, 11.84, 11.85, 11.86, 11.87, 11.88, 11.89, 11.90, 11.91, 11.92, 11.93, 11.94, 11.95, 11.96, 11.97, 11.98, 11.99, 12.00, 12.01, 12.02, 12.03, 12.04, 12.05, 12.06, 12.07, 12.08, 12.09, 12.10, 12.11, 12.12, 12.13, 12.14, 12.15, 12.16, 12.17, 12.18, 12.19, 12.20, 12.21, 12.22, 12.23, 12.24, 12.25, 12.26, 12.27, 12.28, 12.29, 12.30, 12.31, 12.32, 12.33, 12.34, 12.35, 12.36, 12.37, 12.38, 12.39, 12.40, 12.41, 12.42, 12.43, 12.44, 12.45, 12.46, 12.47, 12.48, 12.49, 12.50, 12.51, 12.52, 12.53, 12.54, 12.55, 12.56, 12.57, 12.58, 12.59, 12.60, 12.61, 12.62, 12.63, 12.64, 12.65, 12.66, 12.67, 12.68, 12.69, 12.70, 12.71, 12.72, 12.73, 12.74, 12.75, 12.76, 12.77, 12.78, 12.79, 12.80, 12.81, 12.82, 12.83, 12.84, 12.85, 12.86, 12.87, 12.88, 12.89, 12.90, 12.91, 12.92, 12.93, 12.94, 12.95, 12.96, 12.97, 12.98, 12.99, 13.00, 13.01, 13.02, 13.03, 13.04, 13.05, 13.06, 13.07, 13.08, 13.09, 13.10, 13.11, 13.12, 13.13, 13.14, 13.15, 13.16, 13.17, 13.18, 13.19, 13.20, 13.21, 13.22, 13.23, 13.24, 13.25, 13.26, 13.27, 13.28, 13.29, 13.30, 13.31, 13.32, 13.33, 13.34, 13.35, 13.36, 13.37, 13.38, 13.39, 13.40, 13.41, 13.42, 13.43, 13.44, 13.45, 13.46, 13.47, 13.48, 13.49, 13.50, 13.51, 13.52, 13.53, 13.54, 13.55, 13.56, 13.57, 13.58, 13.59, 13.60, 13.61, 13.62, 13.63, 13.64, 13.65, 13.66, 13.67, 13.68, 13.69, 13.70, 13.71, 13.72, 13.73, 13.74, 13.75, 13.76, 13.77, 13.78, 13.79, 13.80, 13.81, 13.82, 13.83, 13.84, 13.85, 13.86, 13.87, 13.88, 13.89, 13.90, 13.91, 13.92, 13.93, 13.94, 13.95, 13.96, 13.97, 13.98, 13.99, 14.00, 14.01, 14.02, 14.03, 14.04, 14.05, 14.06, 14.07, 14.08, 14.09, 14.10, 14.11, 14.12, 14.13, 14.14, 14.15, 14.16, 14.17, 14.18, 14.19, 14.20, 14.21, 14.22, 14.23, 14.24, 14.25, 14.26, 14.27, 14.28, 14.29, 14.30, 14.31, 14.32, 14.33, 14.34, 14.35, 14.36, 14.37, 14.38, 14.39, 14.40, 14.41, 14.42, 14.43, 14.44, 14.45, 14.46, 14.47, 14.48, 14.49, 14.50, 14.51, 14.52, 14.53, 14.54, 14.55, 14.56, 14.57, 14.58, 14.59, 14.60, 14.61, 14.62, 14.63, 14.64, 14.65, 14.66, 14.67, 14.68, 14.69, 14.70, 14.71, 14.72, 14.73, 14.74, 14.75, 14.76, 14.77, 14.78, 14.79, 14.80, 14.81, 14.82, 14.83, 14.84, 14.85, 14.86, 14.87, 14.88, 14.89, 14.90, 14.91, 14.92, 14.93, 14.94, 14.95, 14.96, 14.97, 14.98, 14.99, 15.00, 15.01, 15.02, 15.03, 15.04, 15.05, 15.06, 15.07, 15.08, 15.09, 15.10, 15.11, 15.12, 15.13, 15.14, 15.15, 15.16, 15.17, 15.18, 15.19, 15.20, 15.21, 15.22, 15.23, 15.24, 15.25, 15.26, 15.27, 15.28, 15.29, 15.30, 15.31, 15.32, 15.33, 15.34, 15.35, 15.36, 15.37, 15.38, 15.39, 15.40, 15.4

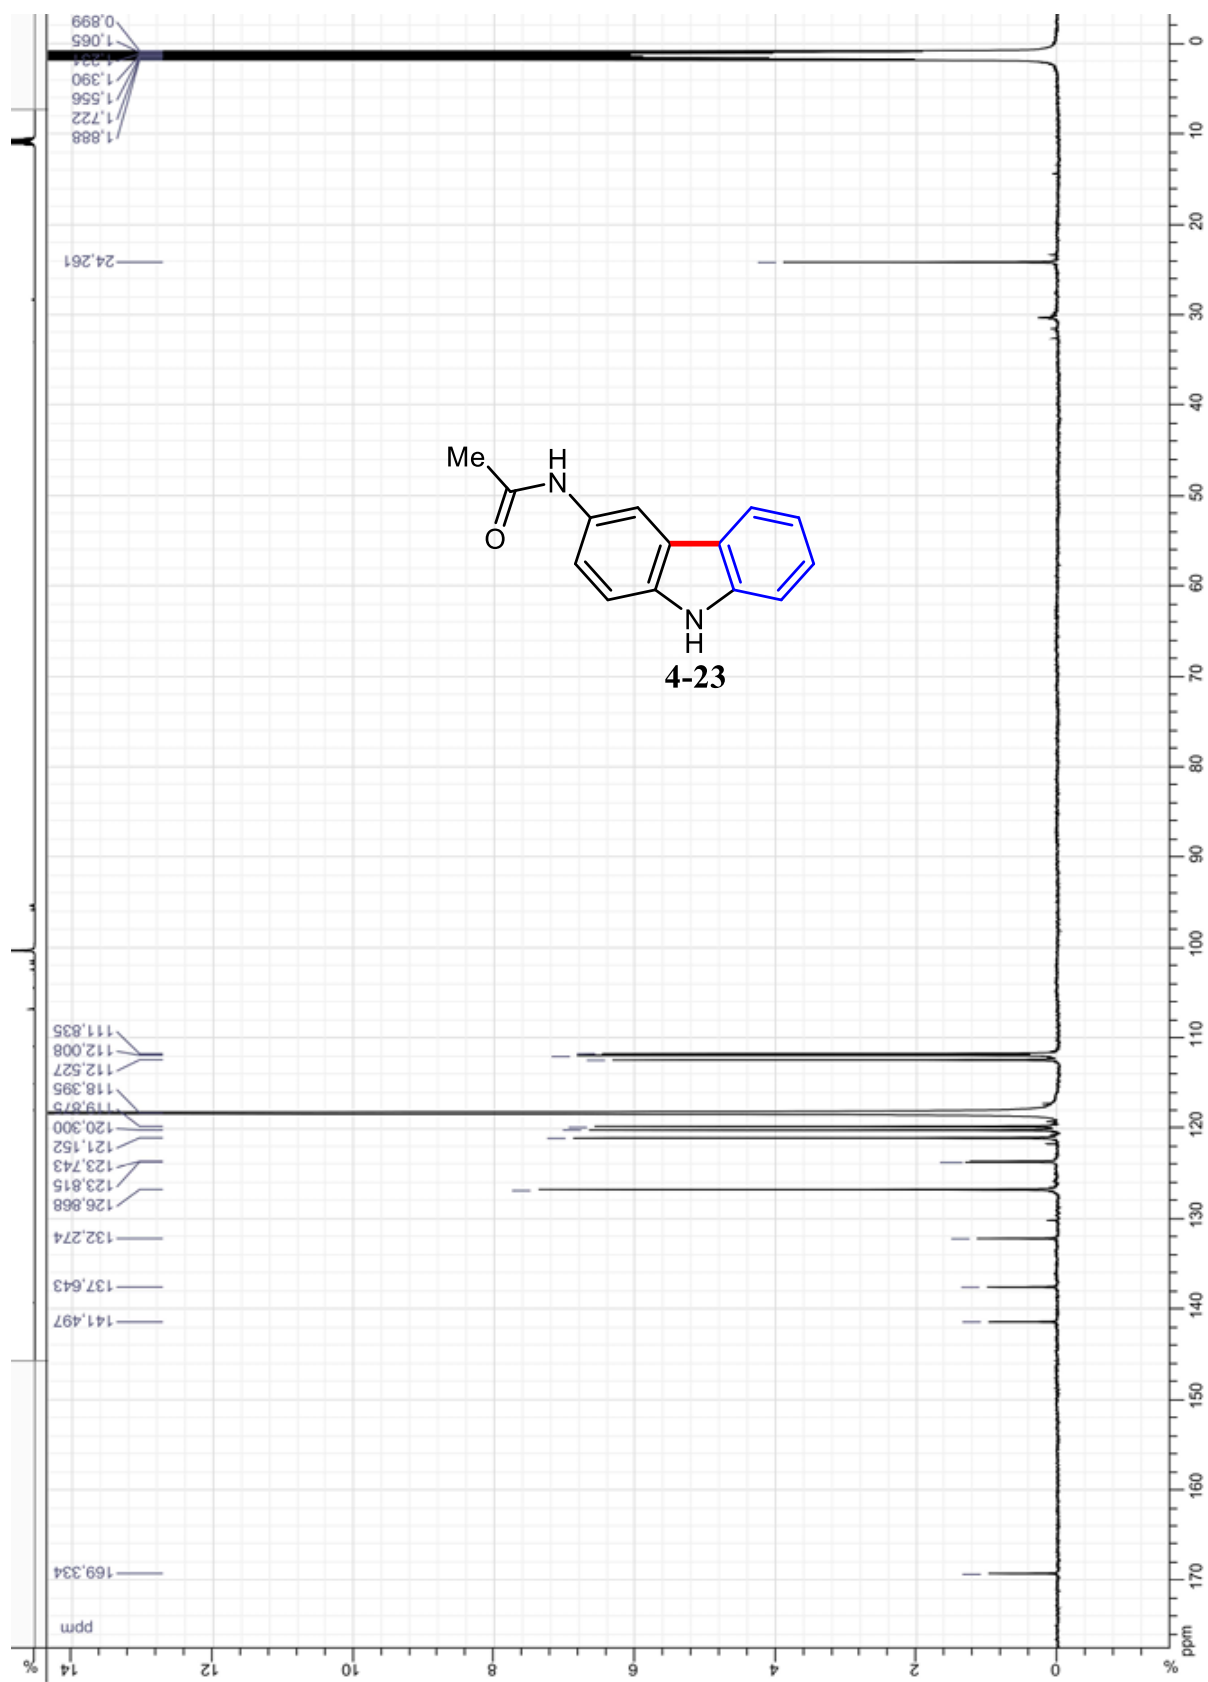

$^1\text{H}$  NMR and  $^{13}\text{C}$  NMR spectra of 3,6-difluoro-9*H*-carbazole (**4-24**) in  $\text{CDCl}_3$

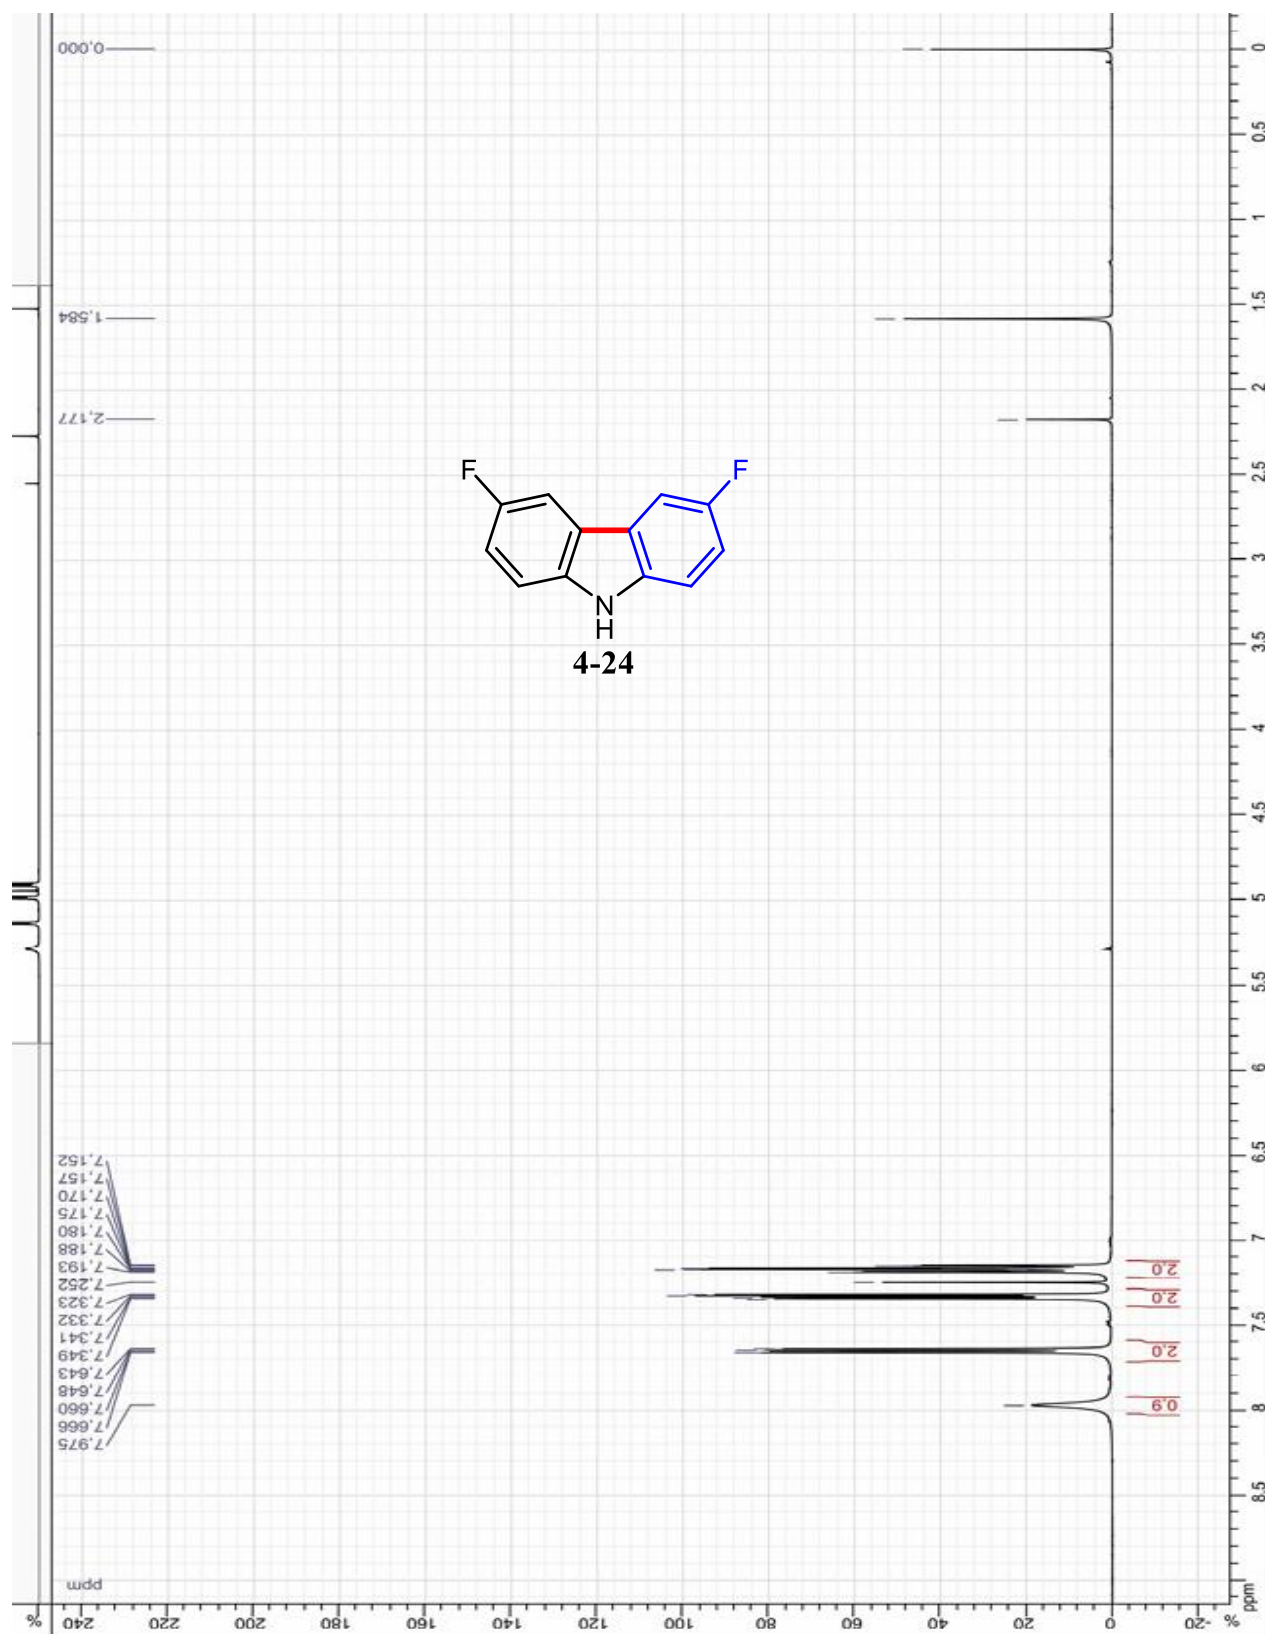

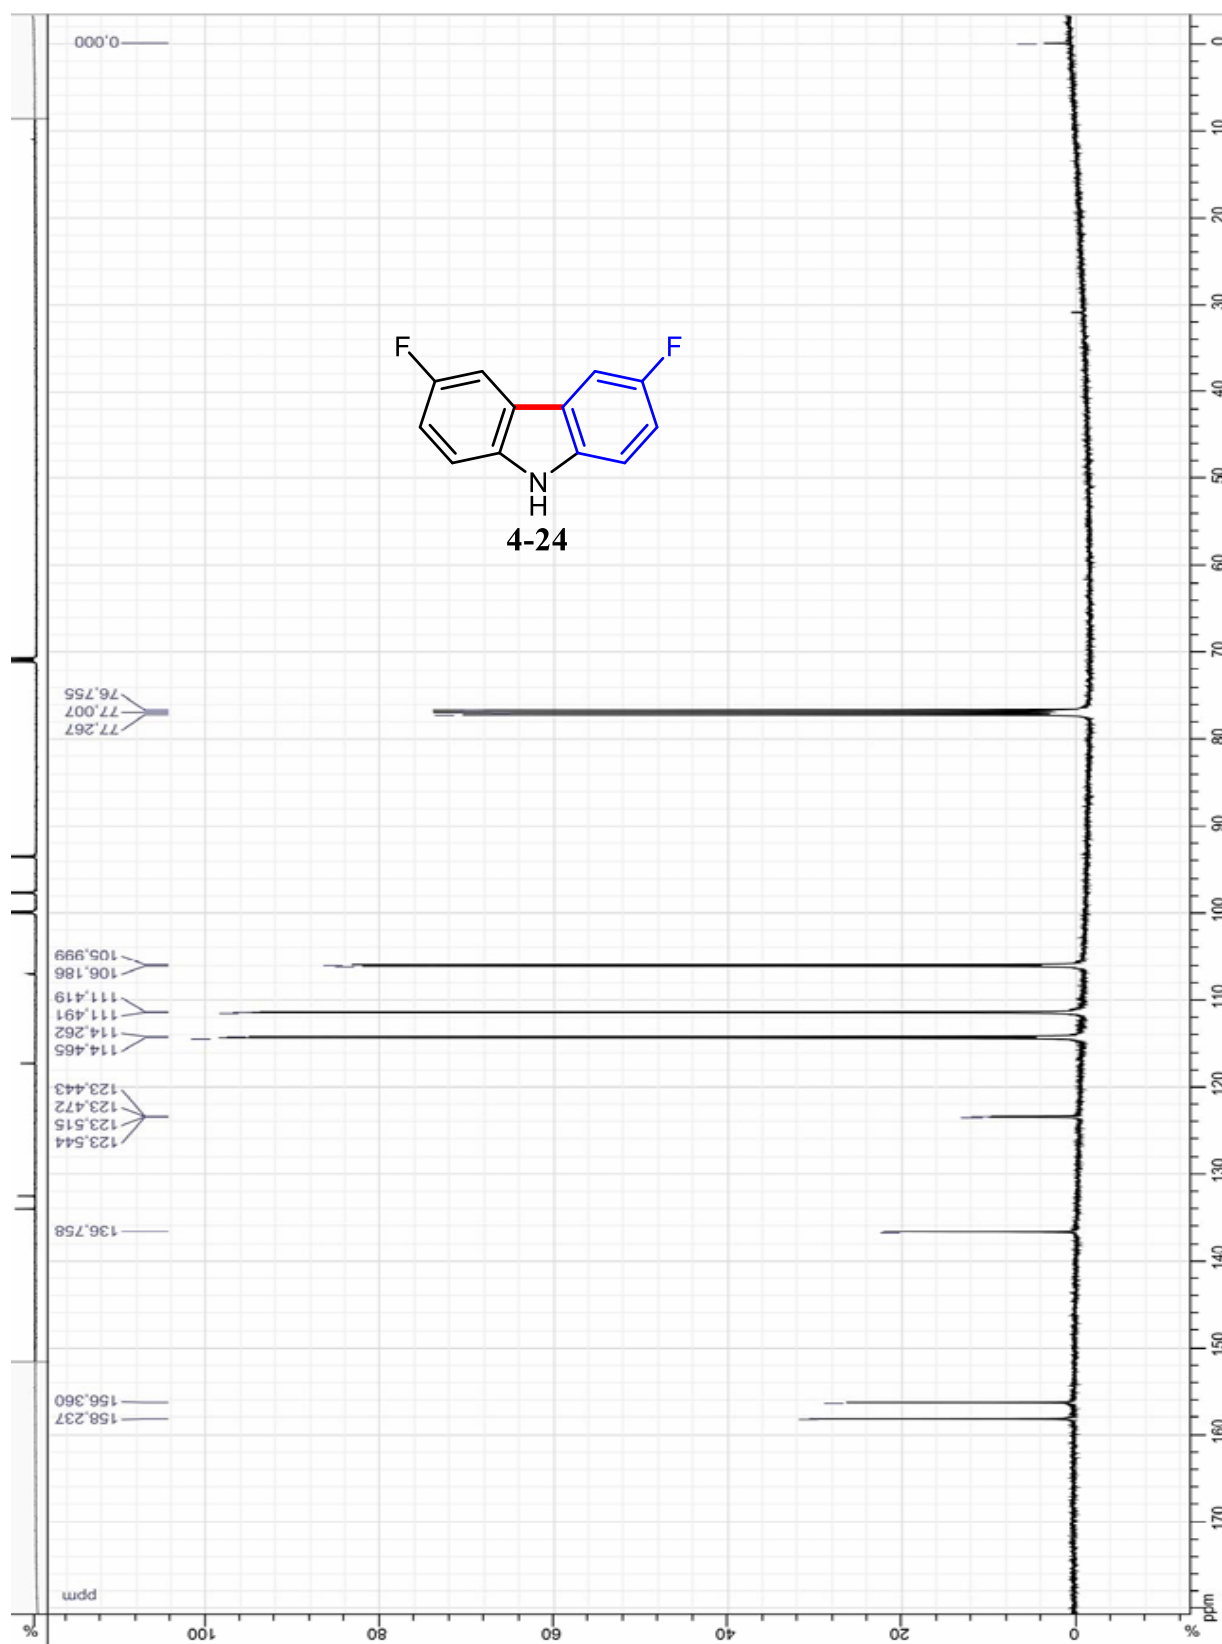

$^1\text{H}$  NMR and  $^{13}\text{C}$  NMR spectra of 3-chloro-6-fluoro-9*H*-carbazole (**4-25**) in  $\text{CDCl}_3$

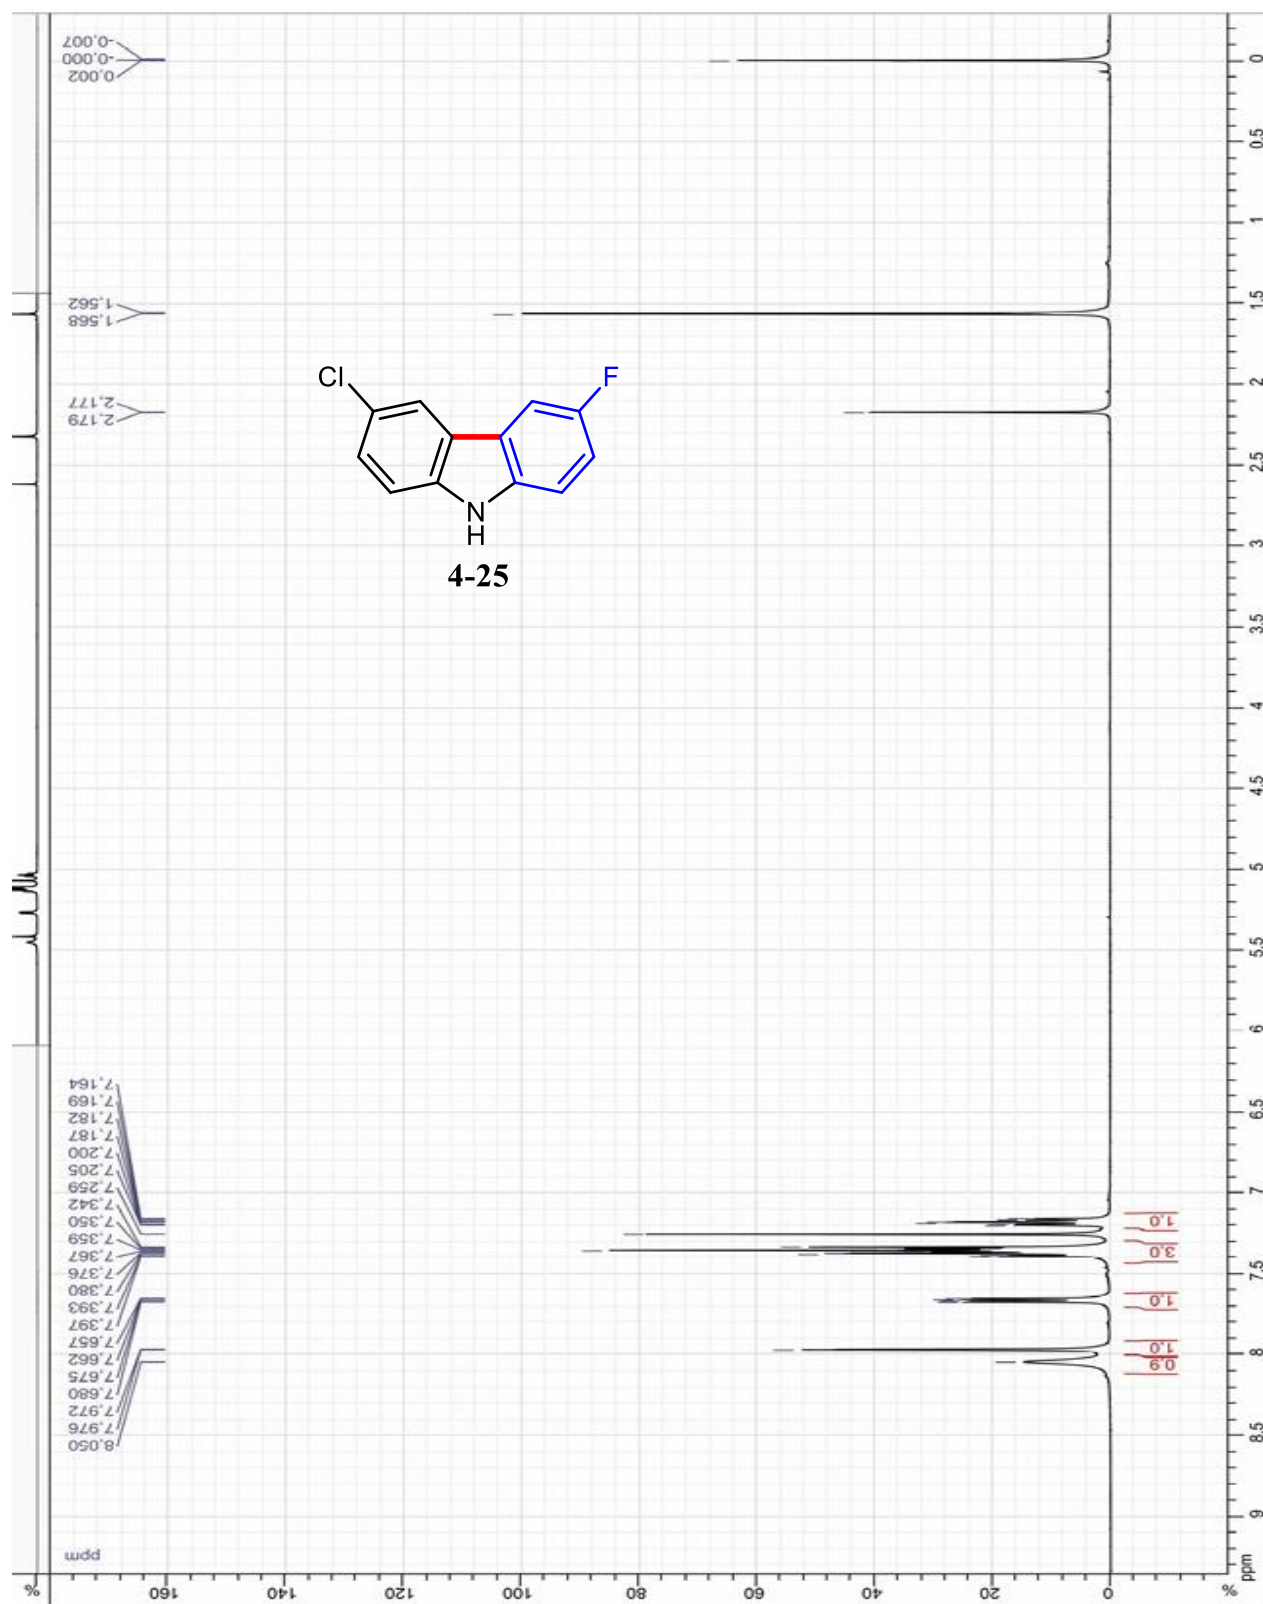



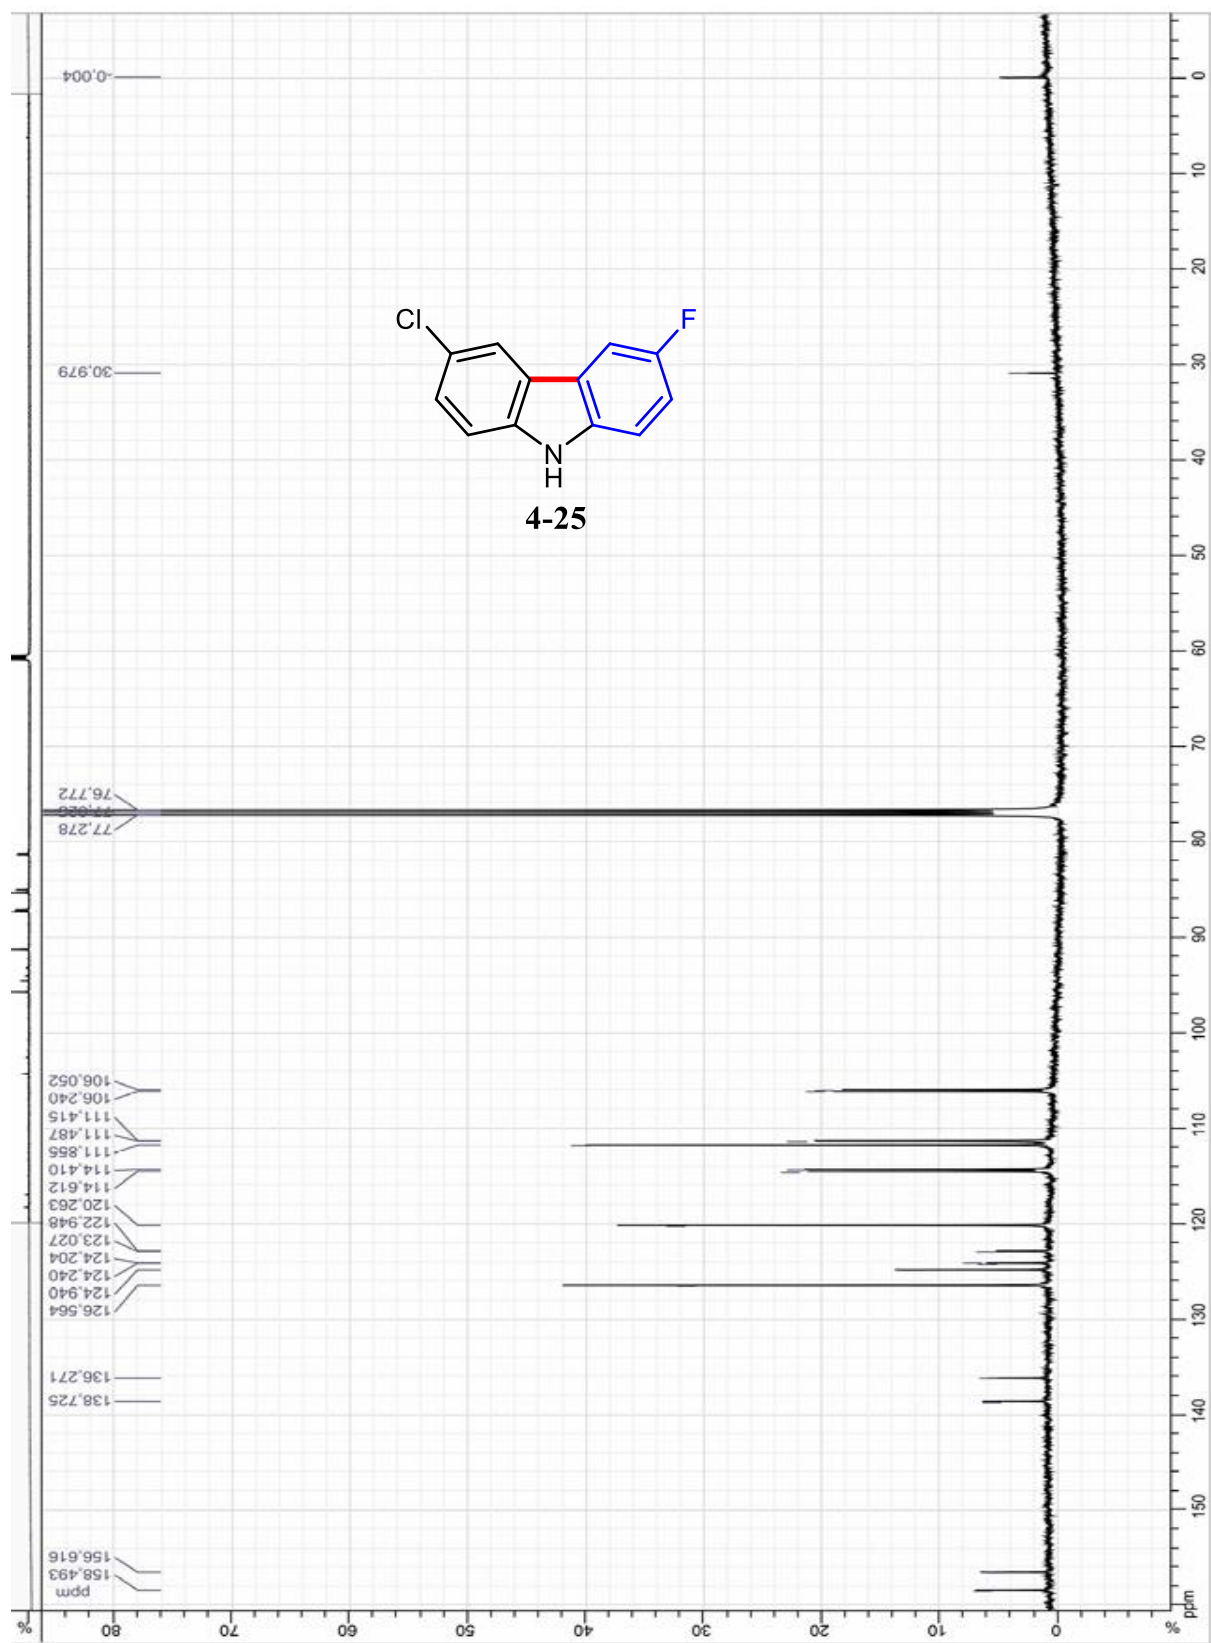



$^1\text{H}$  NMR and  $^{13}\text{C}$  NMR spectra of 3,6-dichloro-9*H*-carbazole (**4-26**) in  $\text{CDCl}_3$

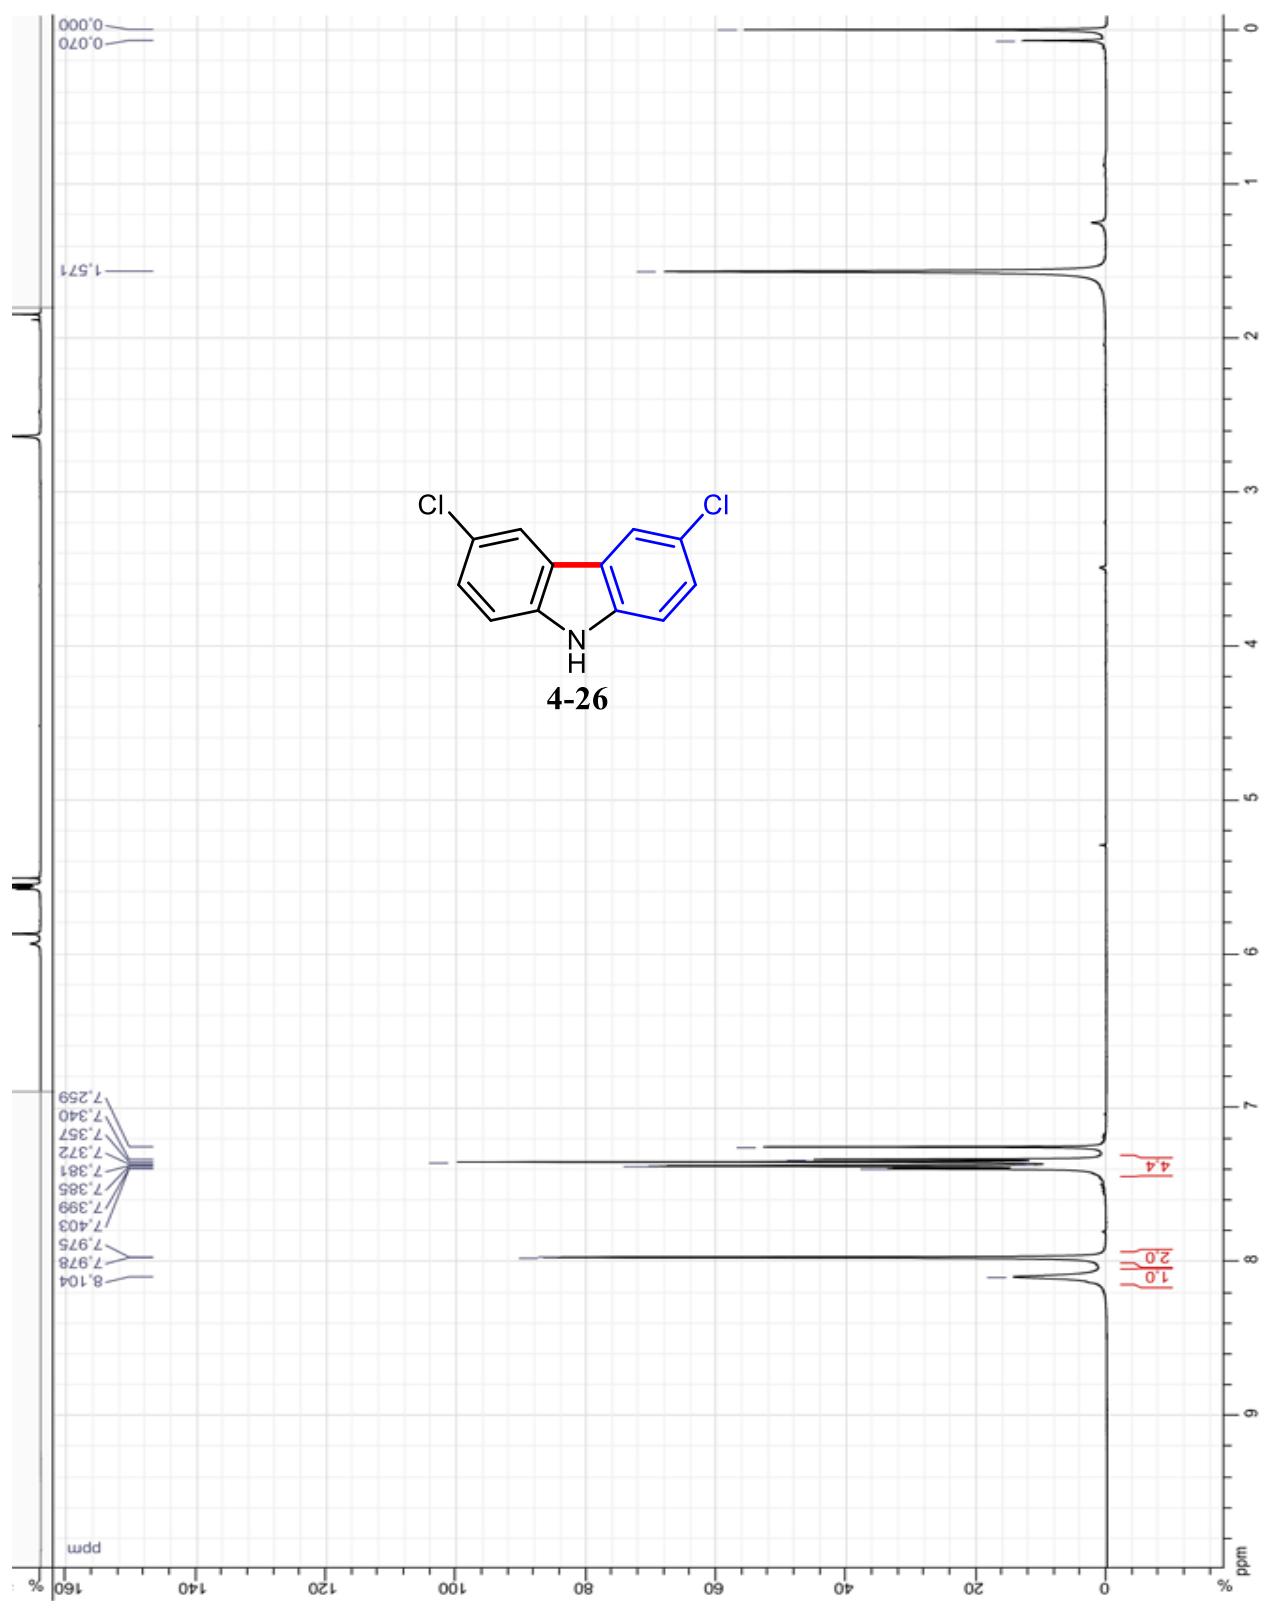

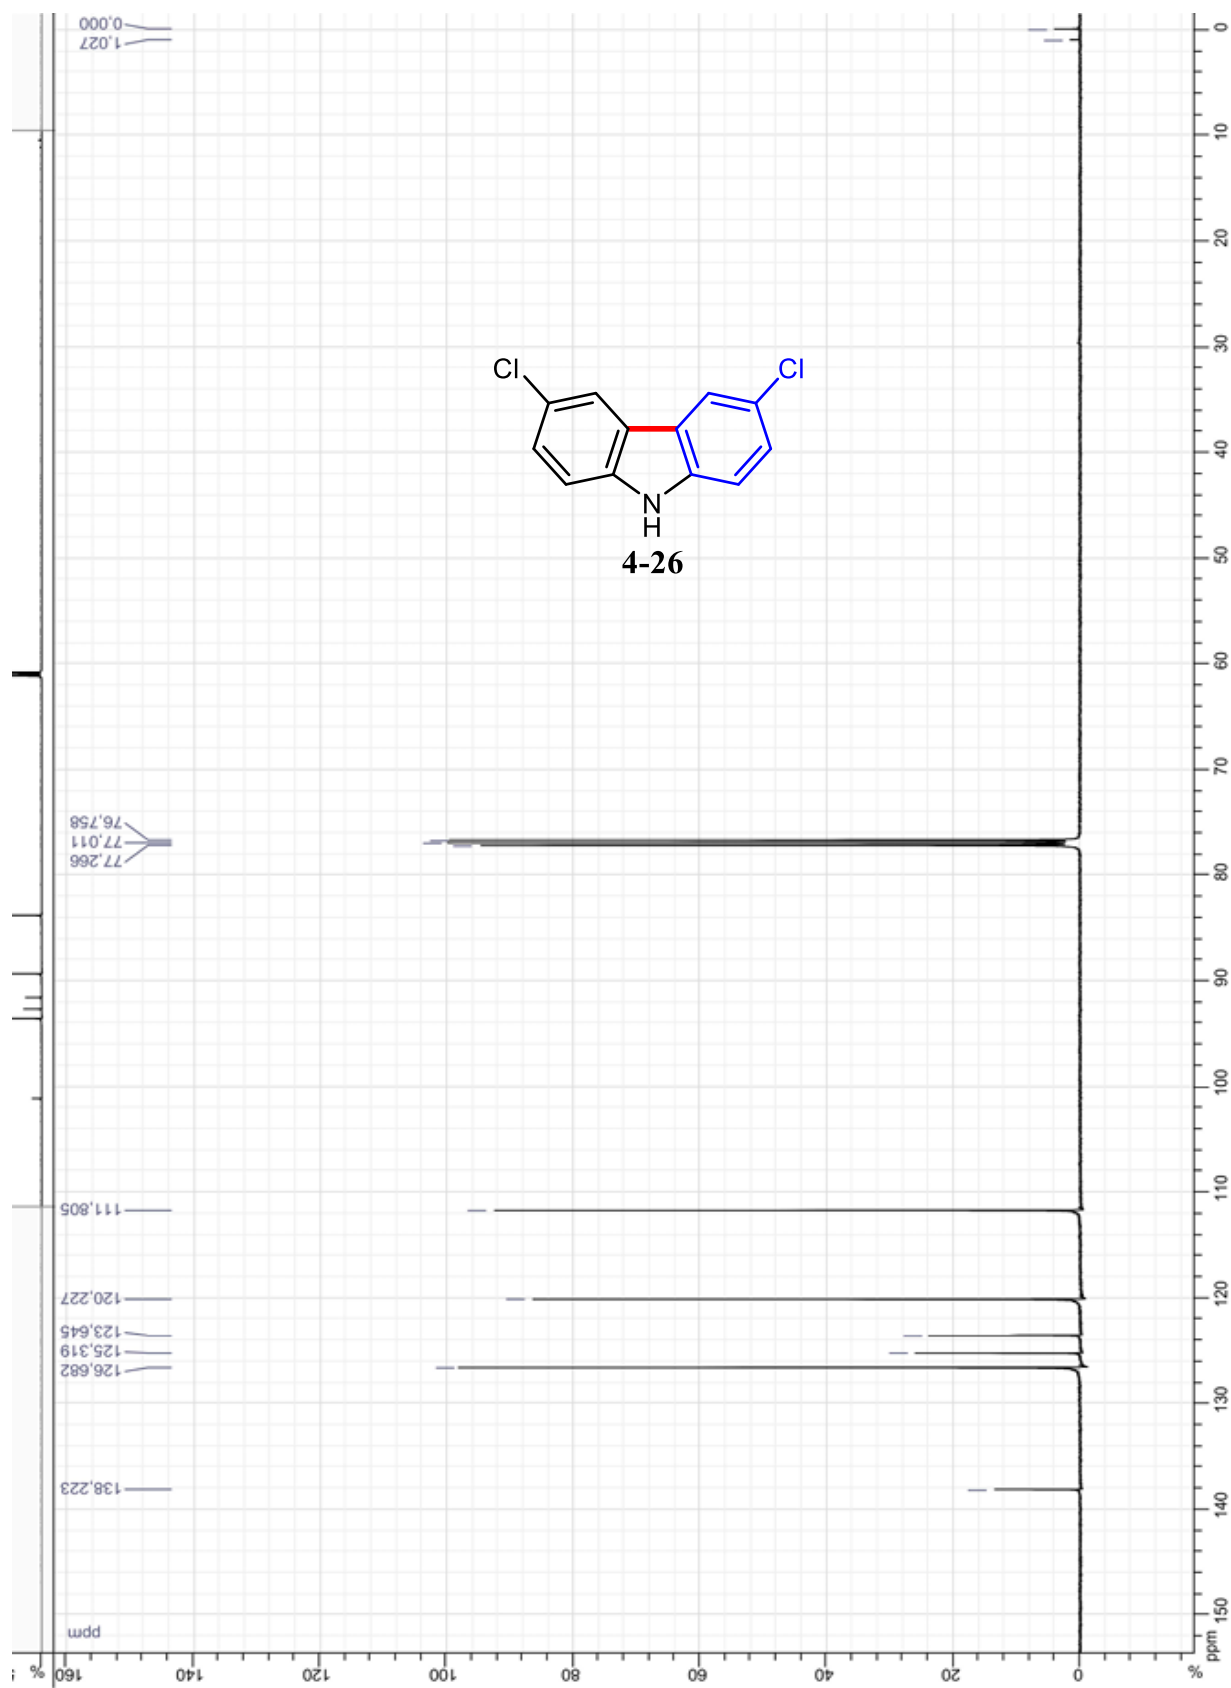

$^1\text{H}$  NMR and  $^{13}\text{C}$  NMR spectra of 3-bromo-6-chloro-9*H*-carbazole (**4-27**) in  $\text{CDCl}_3$

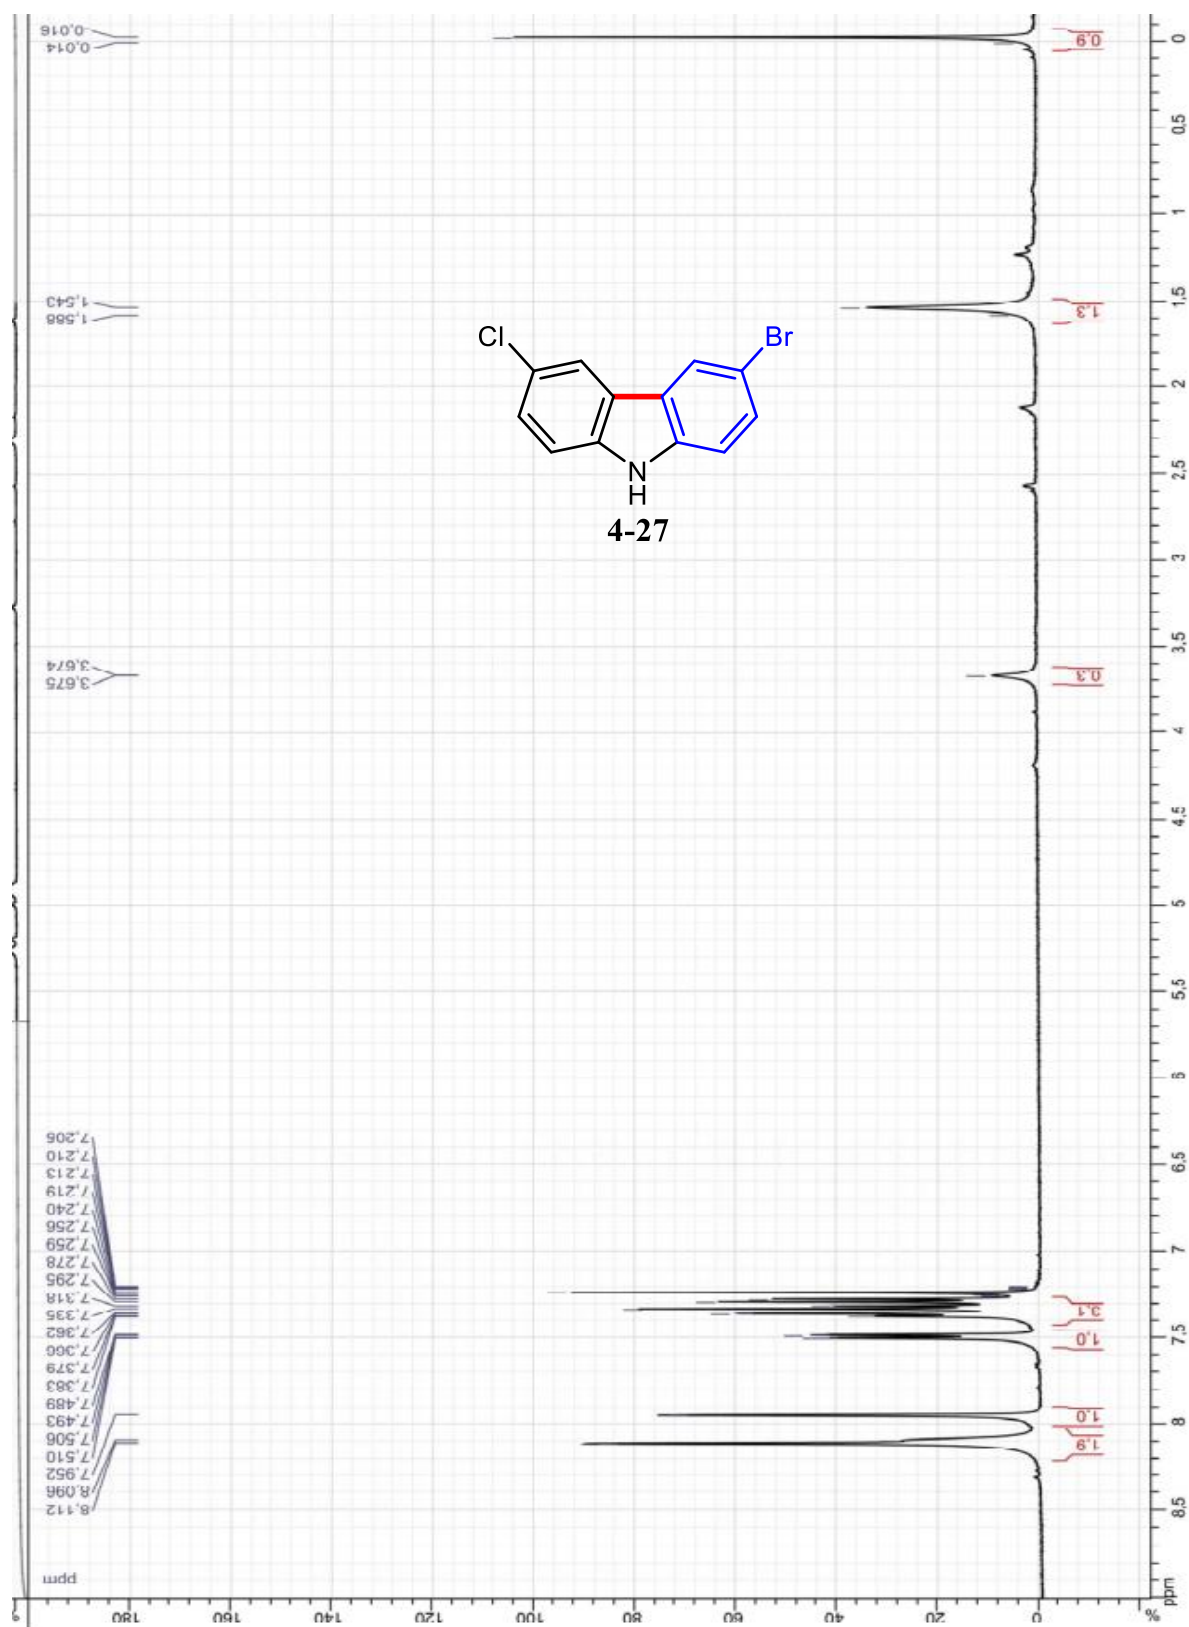

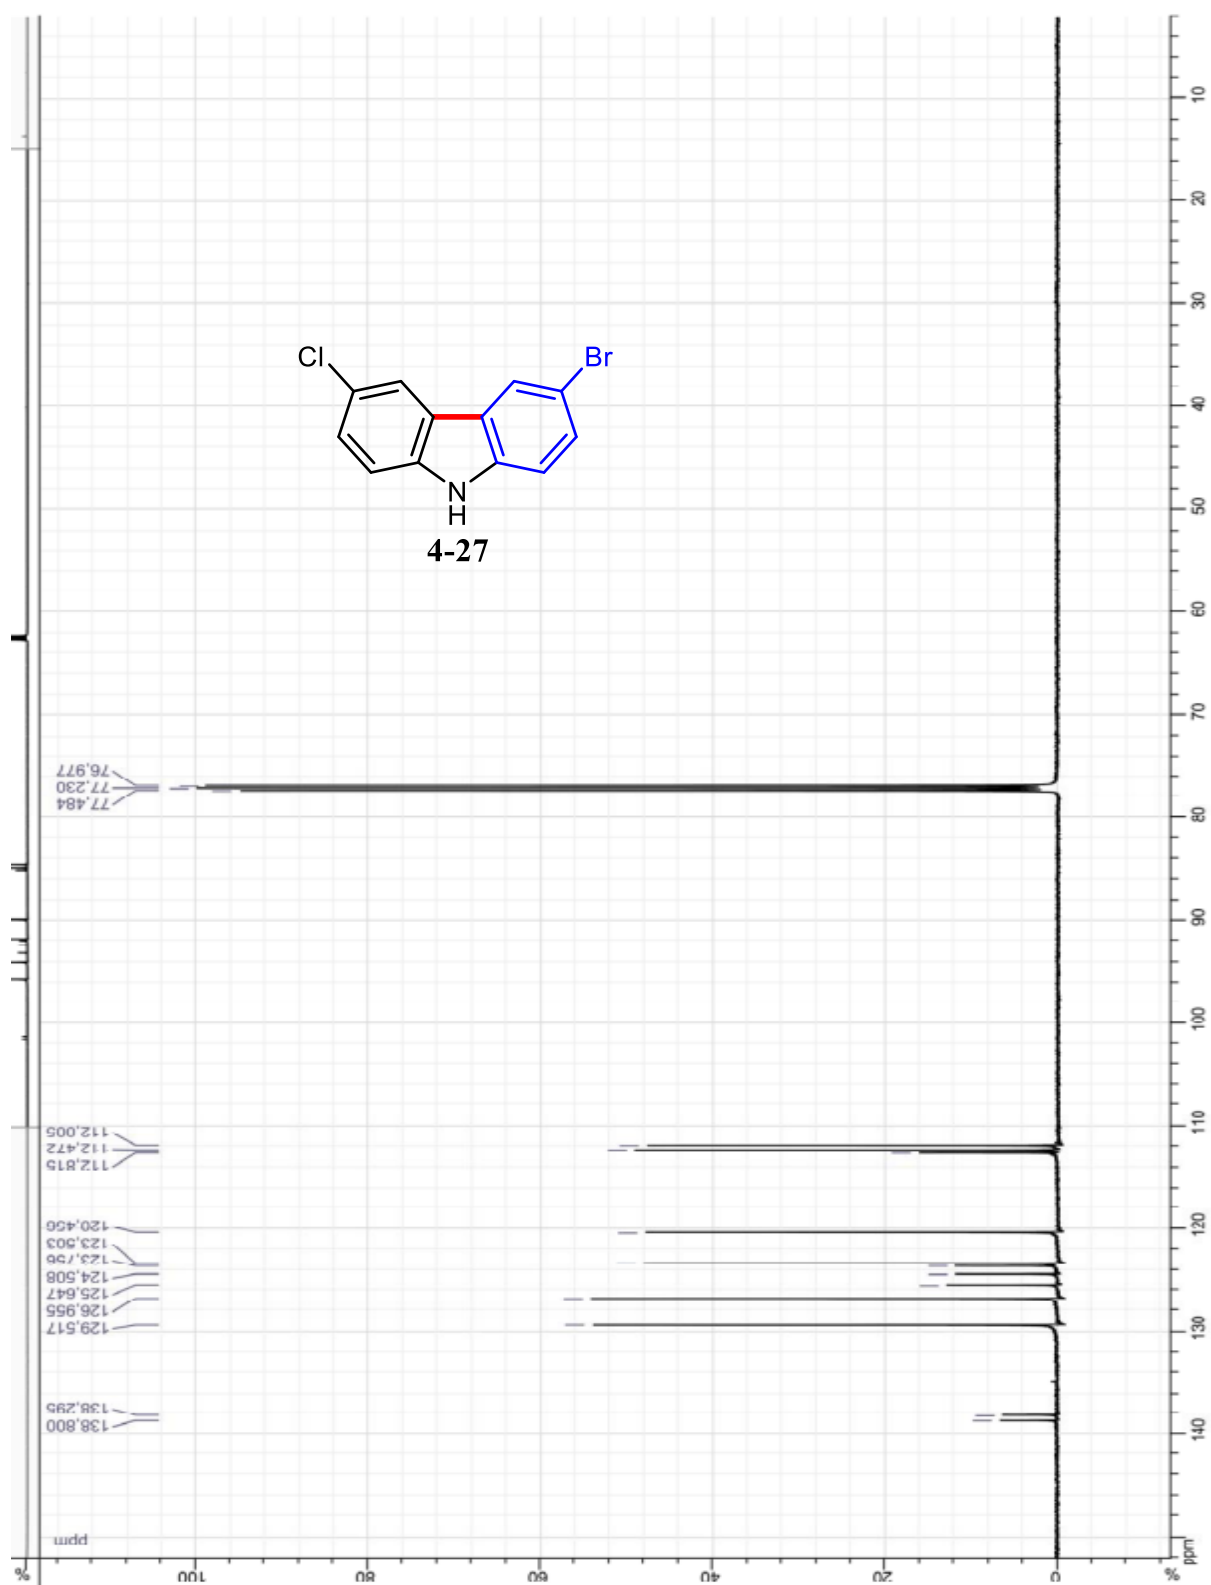

$^1\text{H}$  NMR and  $^{13}\text{C}$  NMR spectra of 3-fluoro-6-methoxy-9*H*-carbazole (**4-28**) in  $\text{CDCl}_3$

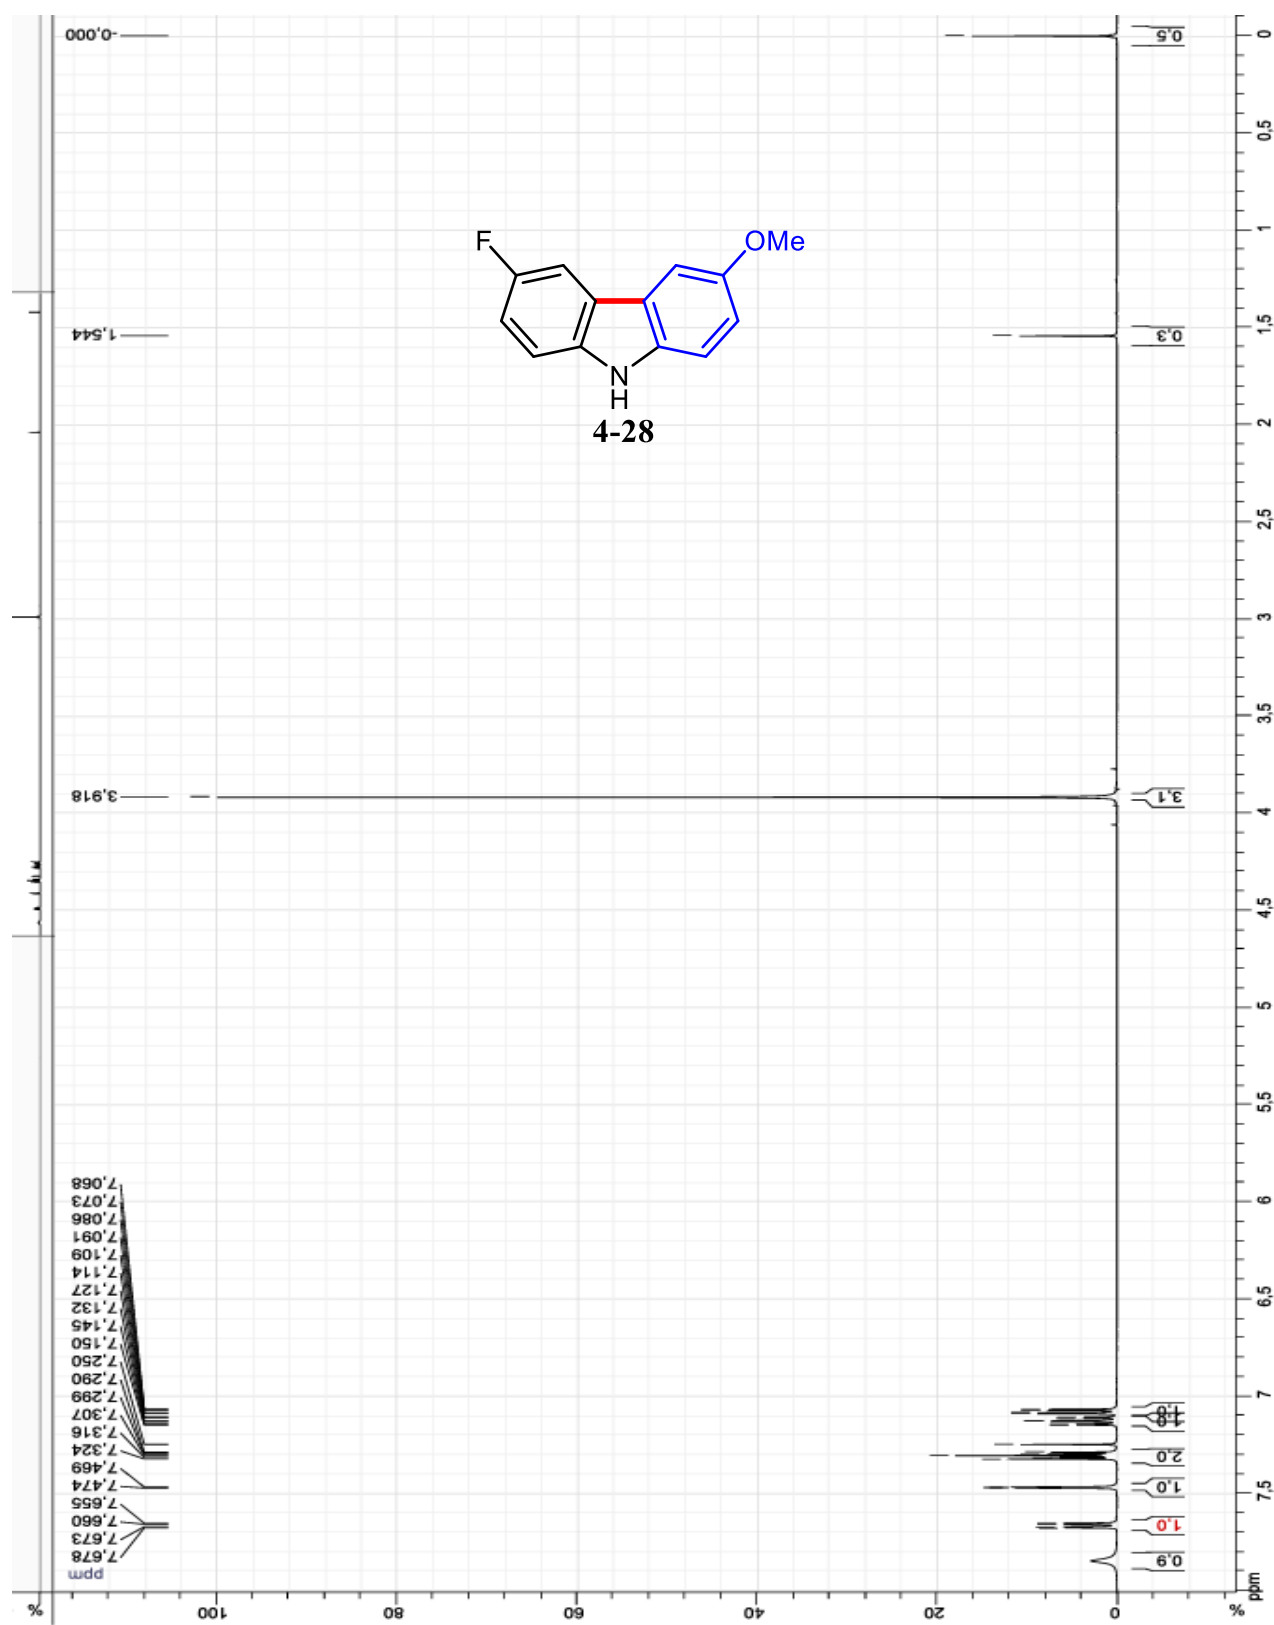

$^1\text{H}$  NMR and  $^{13}\text{C}$  NMR spectra of 3-chloro-6-methoxy-9*H*-carbazole (**4-29**) in  $\text{CDCl}_3$

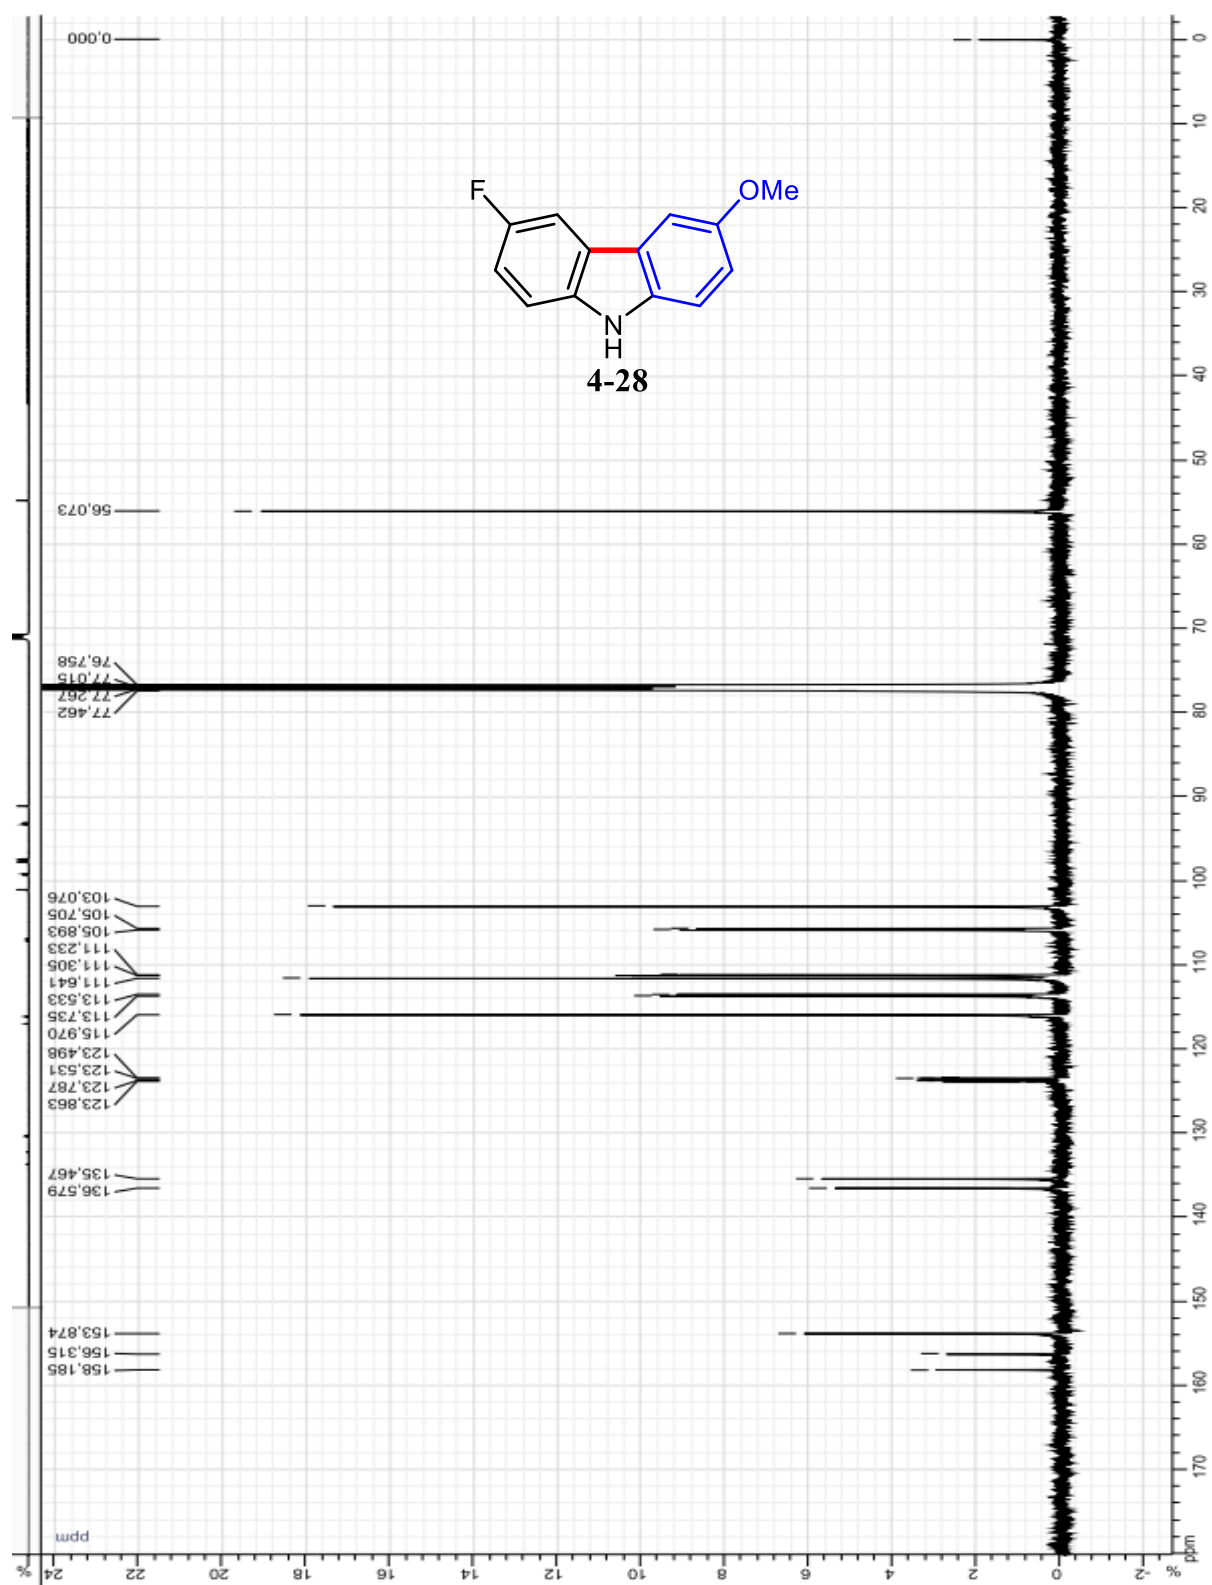

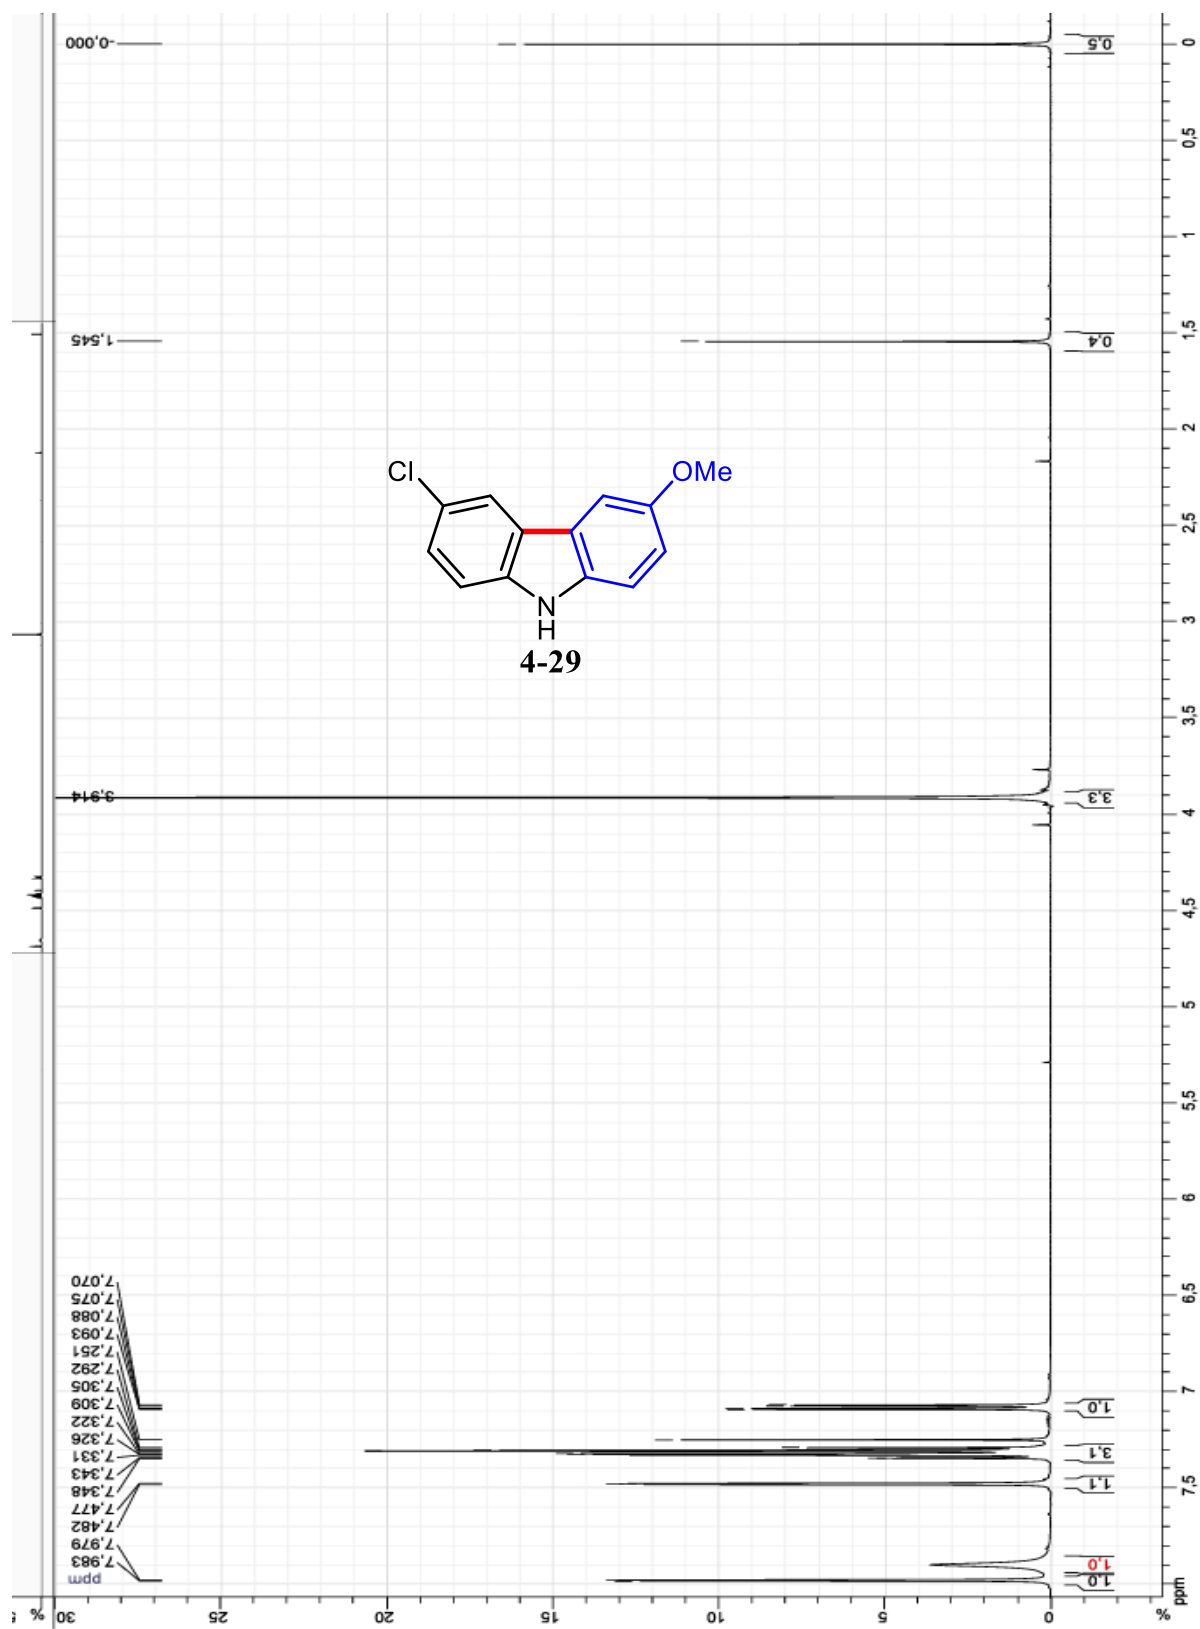

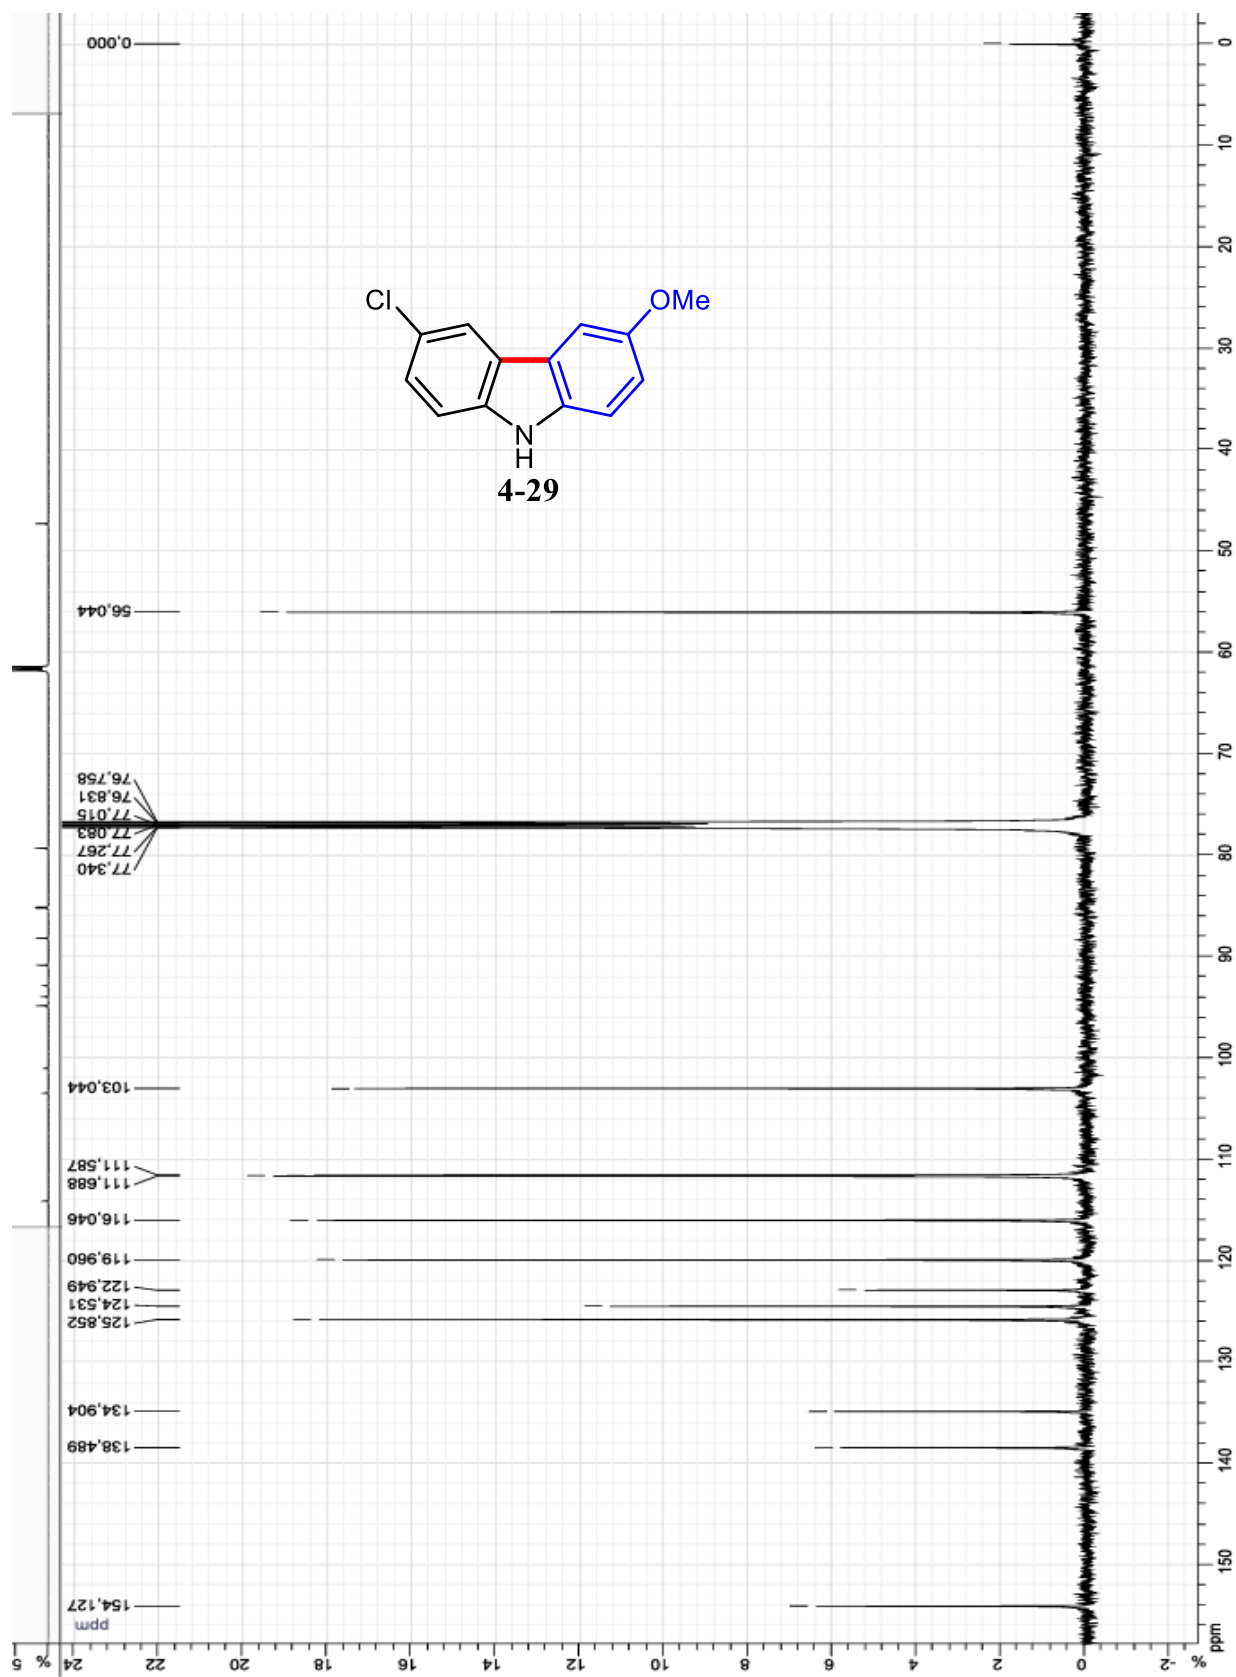



$^1\text{H}$  NMR and  $^{13}\text{C}$  NMR spectra of 3-bromo-6-methoxy-9*H*-carbazole (**4-30**) in  $\text{CDCl}_3$

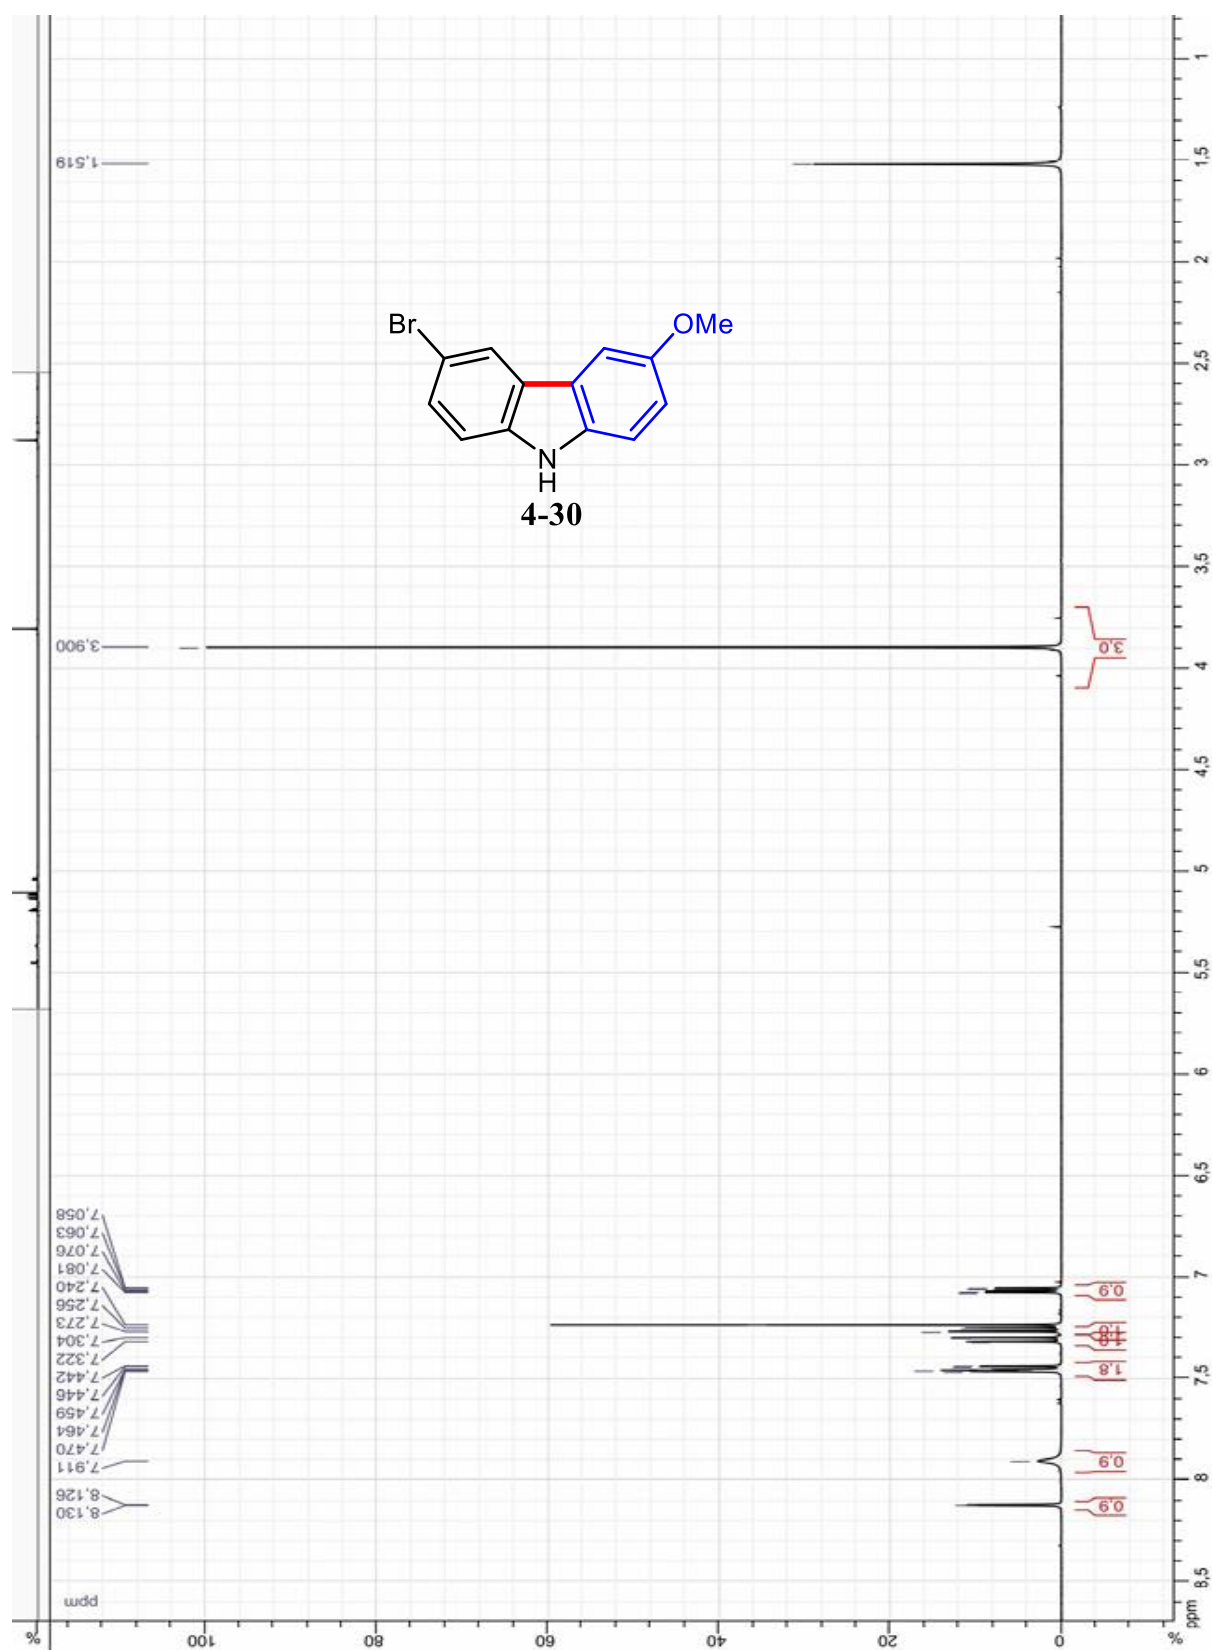

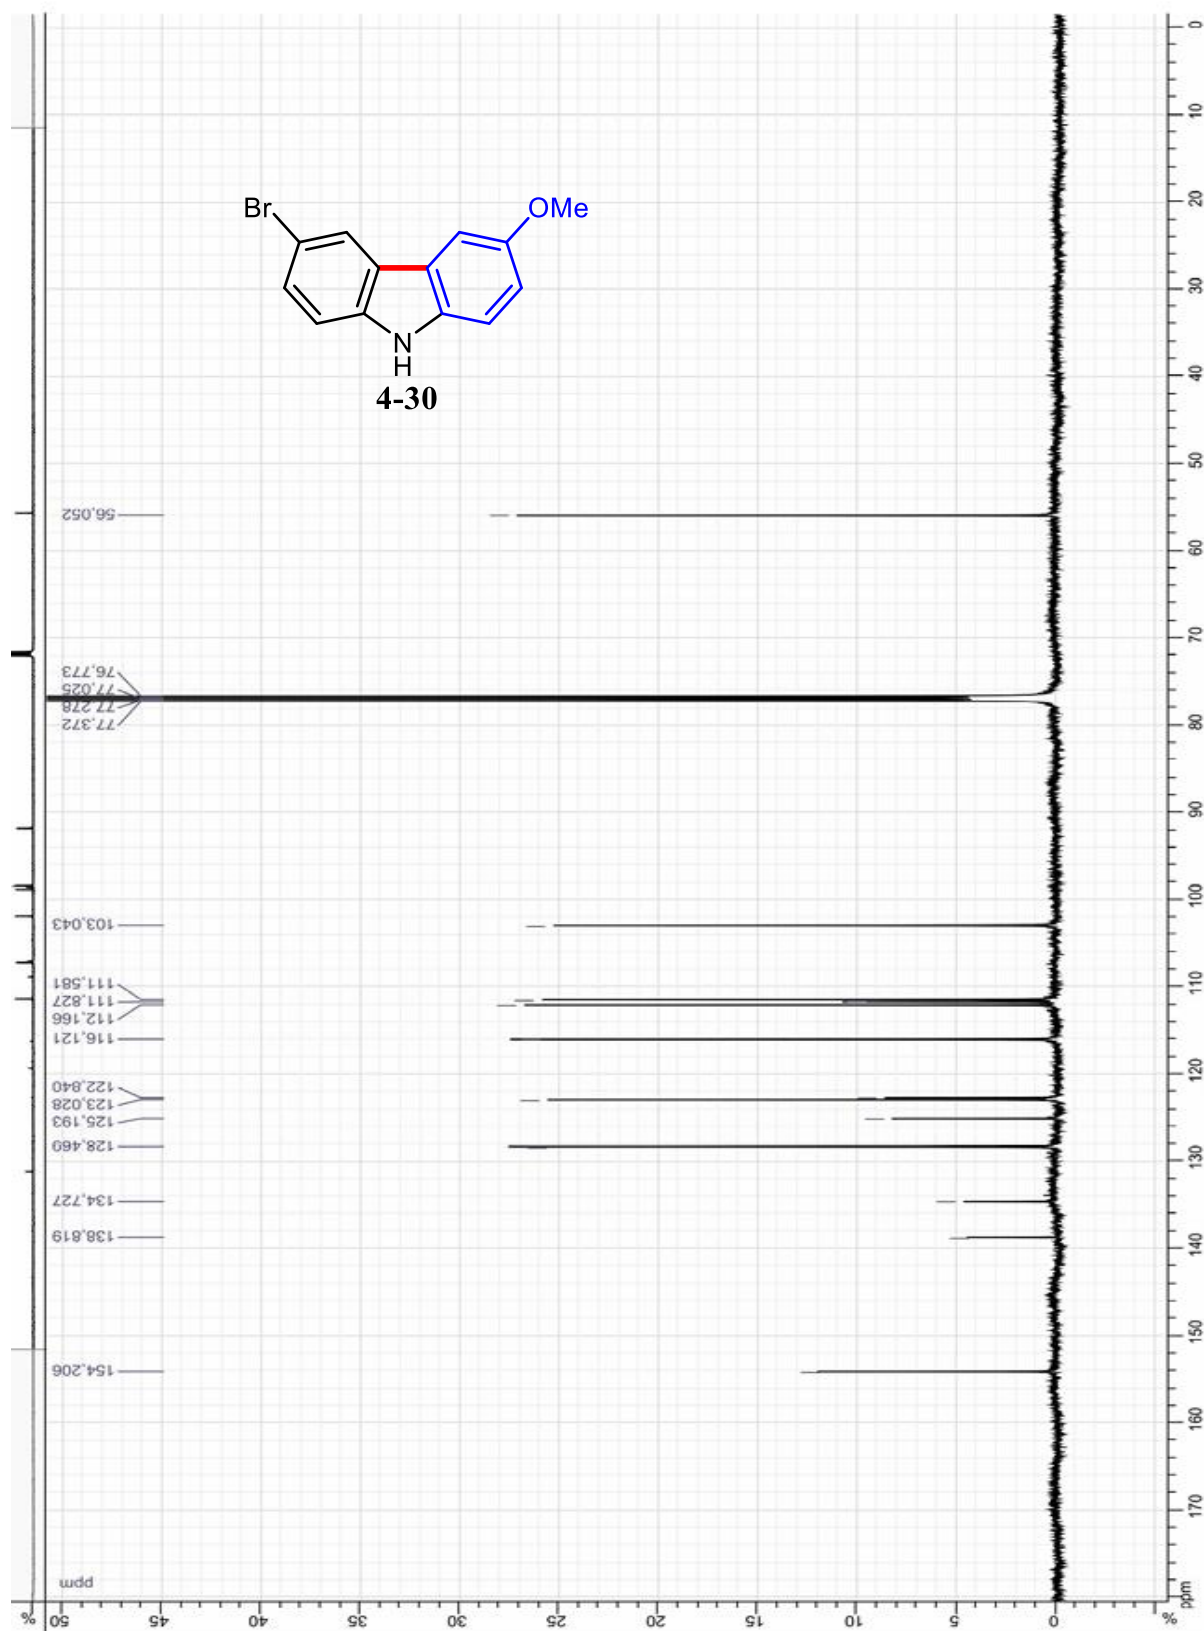

$^1\text{H}$  NMR and  $^{13}\text{C}$  NMR spectra of methyl 6-methoxy-9*H*-carbazole-3-carboxylate (**4-31**) in  $\text{CDCl}_3$

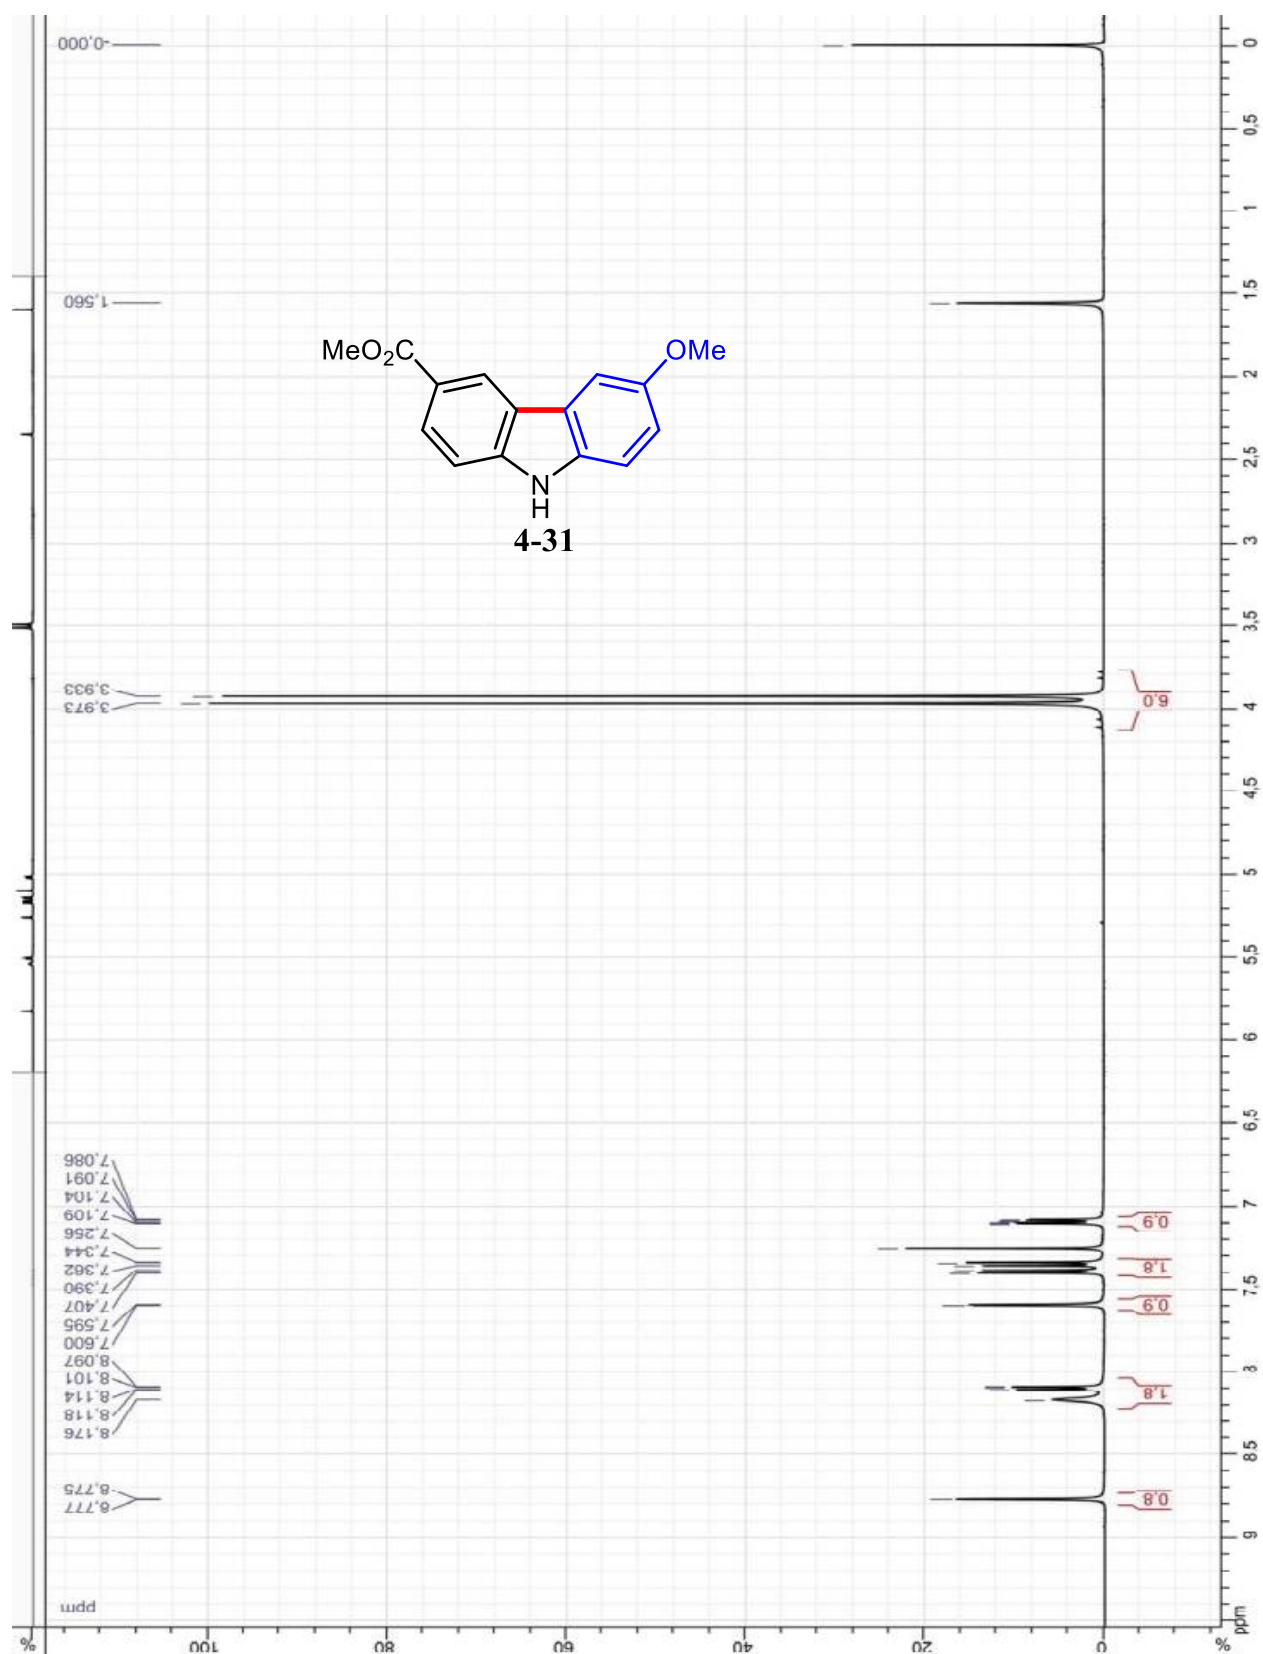

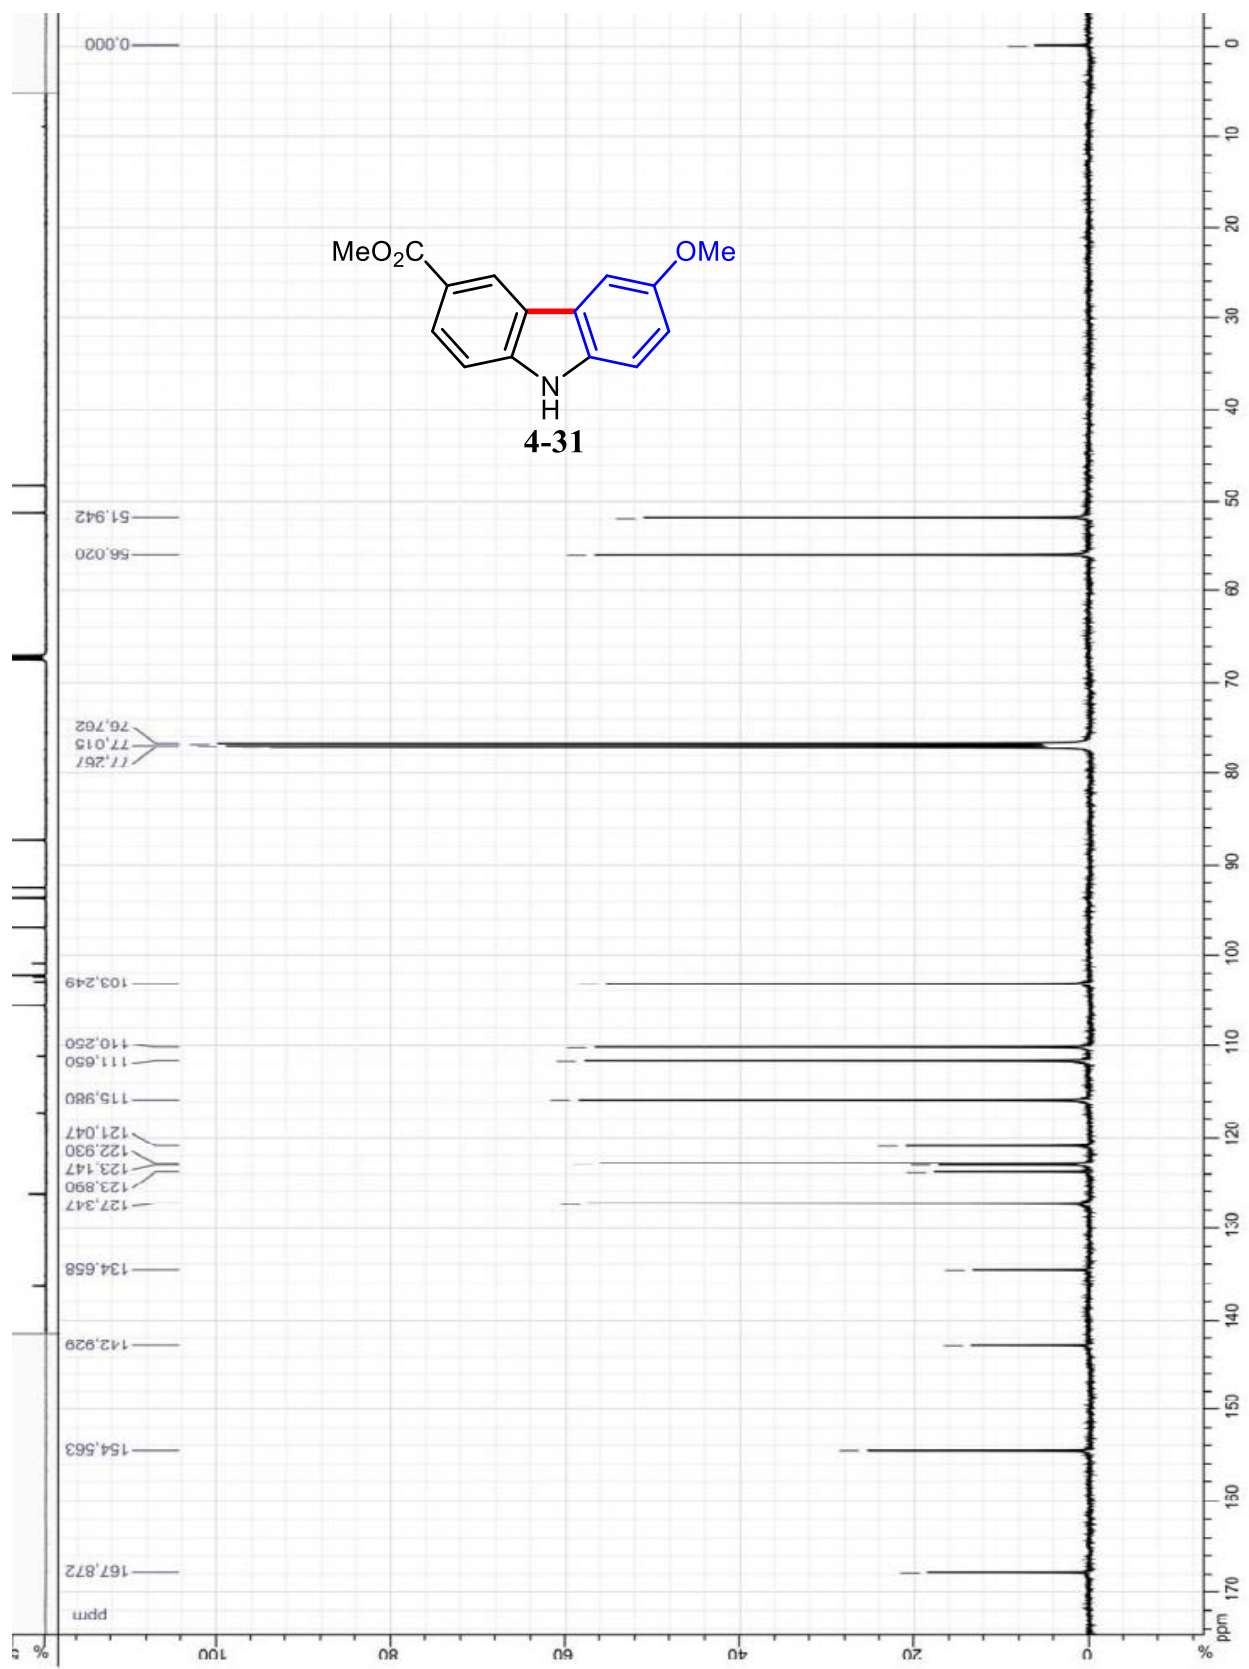

$^1\text{H}$  NMR and  $^{13}\text{C}$  NMR spectra of 3-methoxy-6-nitro-9*H*-carbazole (**4-32**) in  $\text{CDCl}_3$

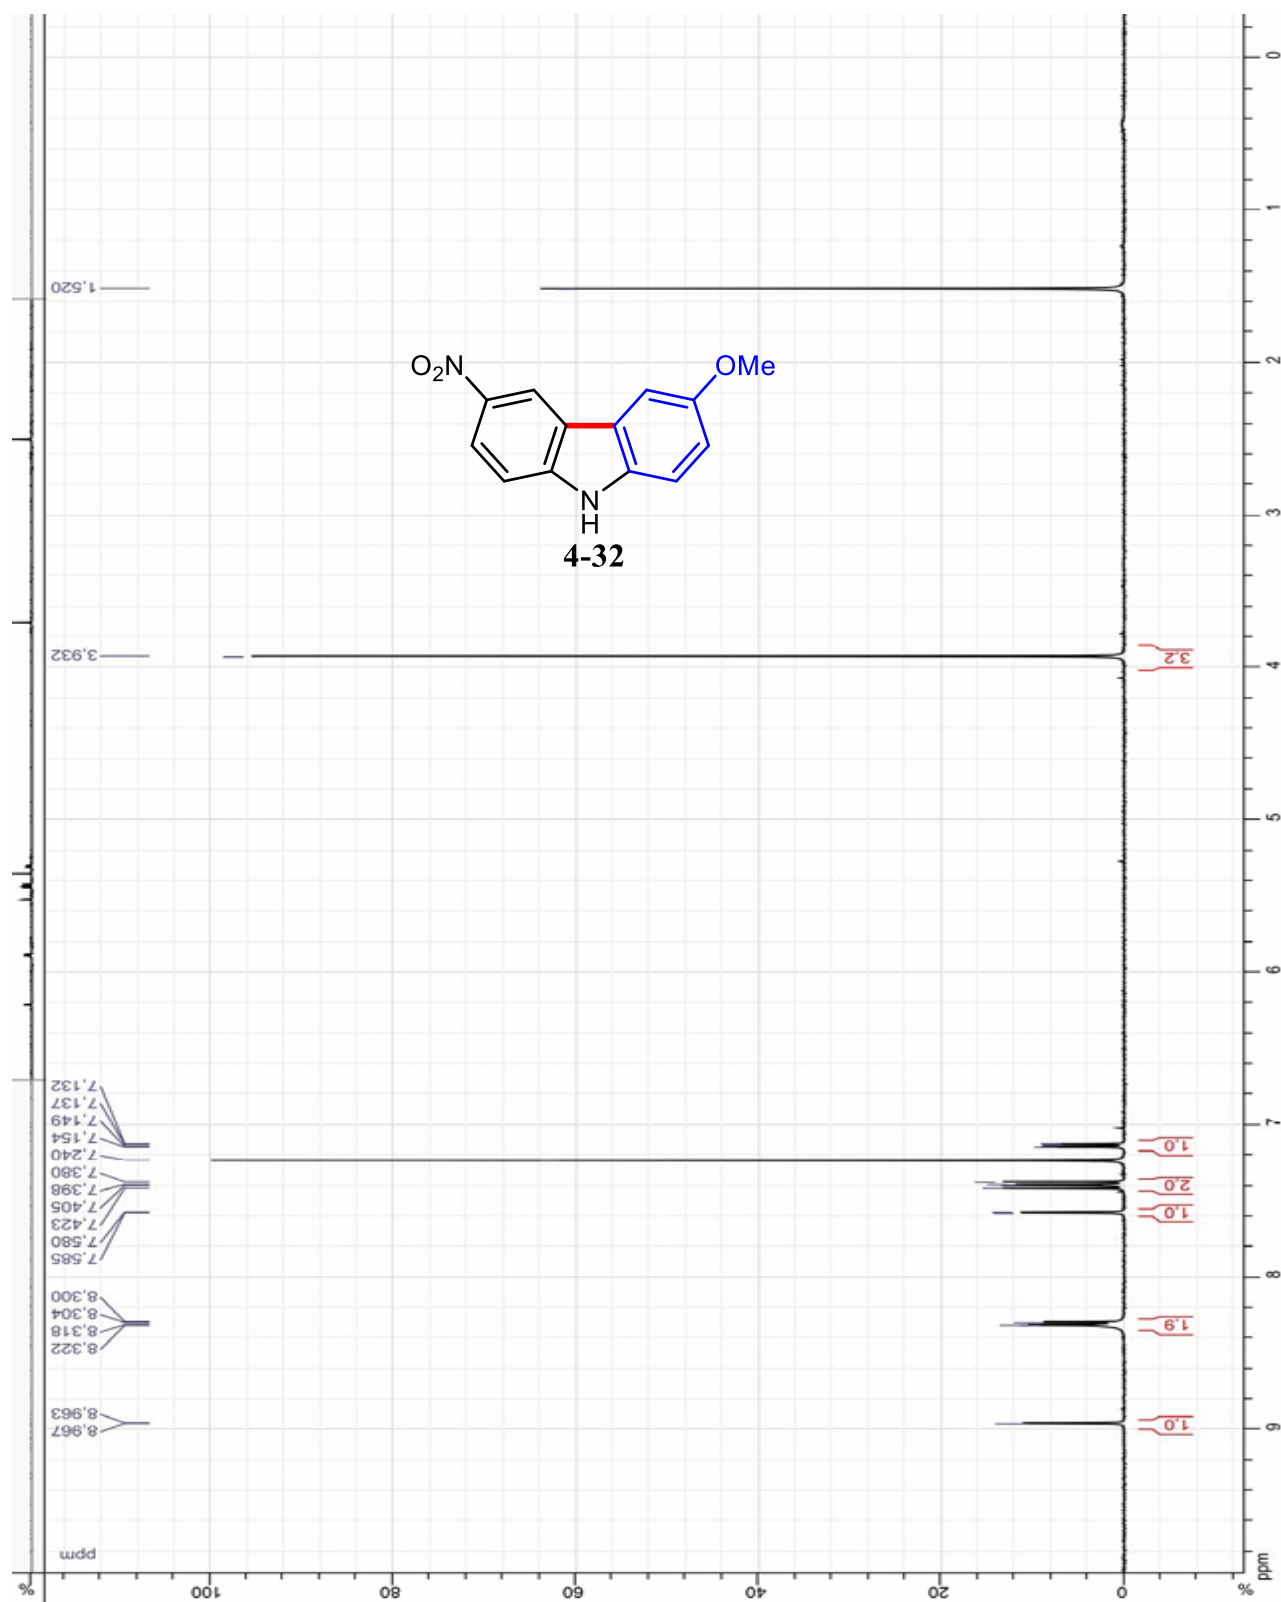

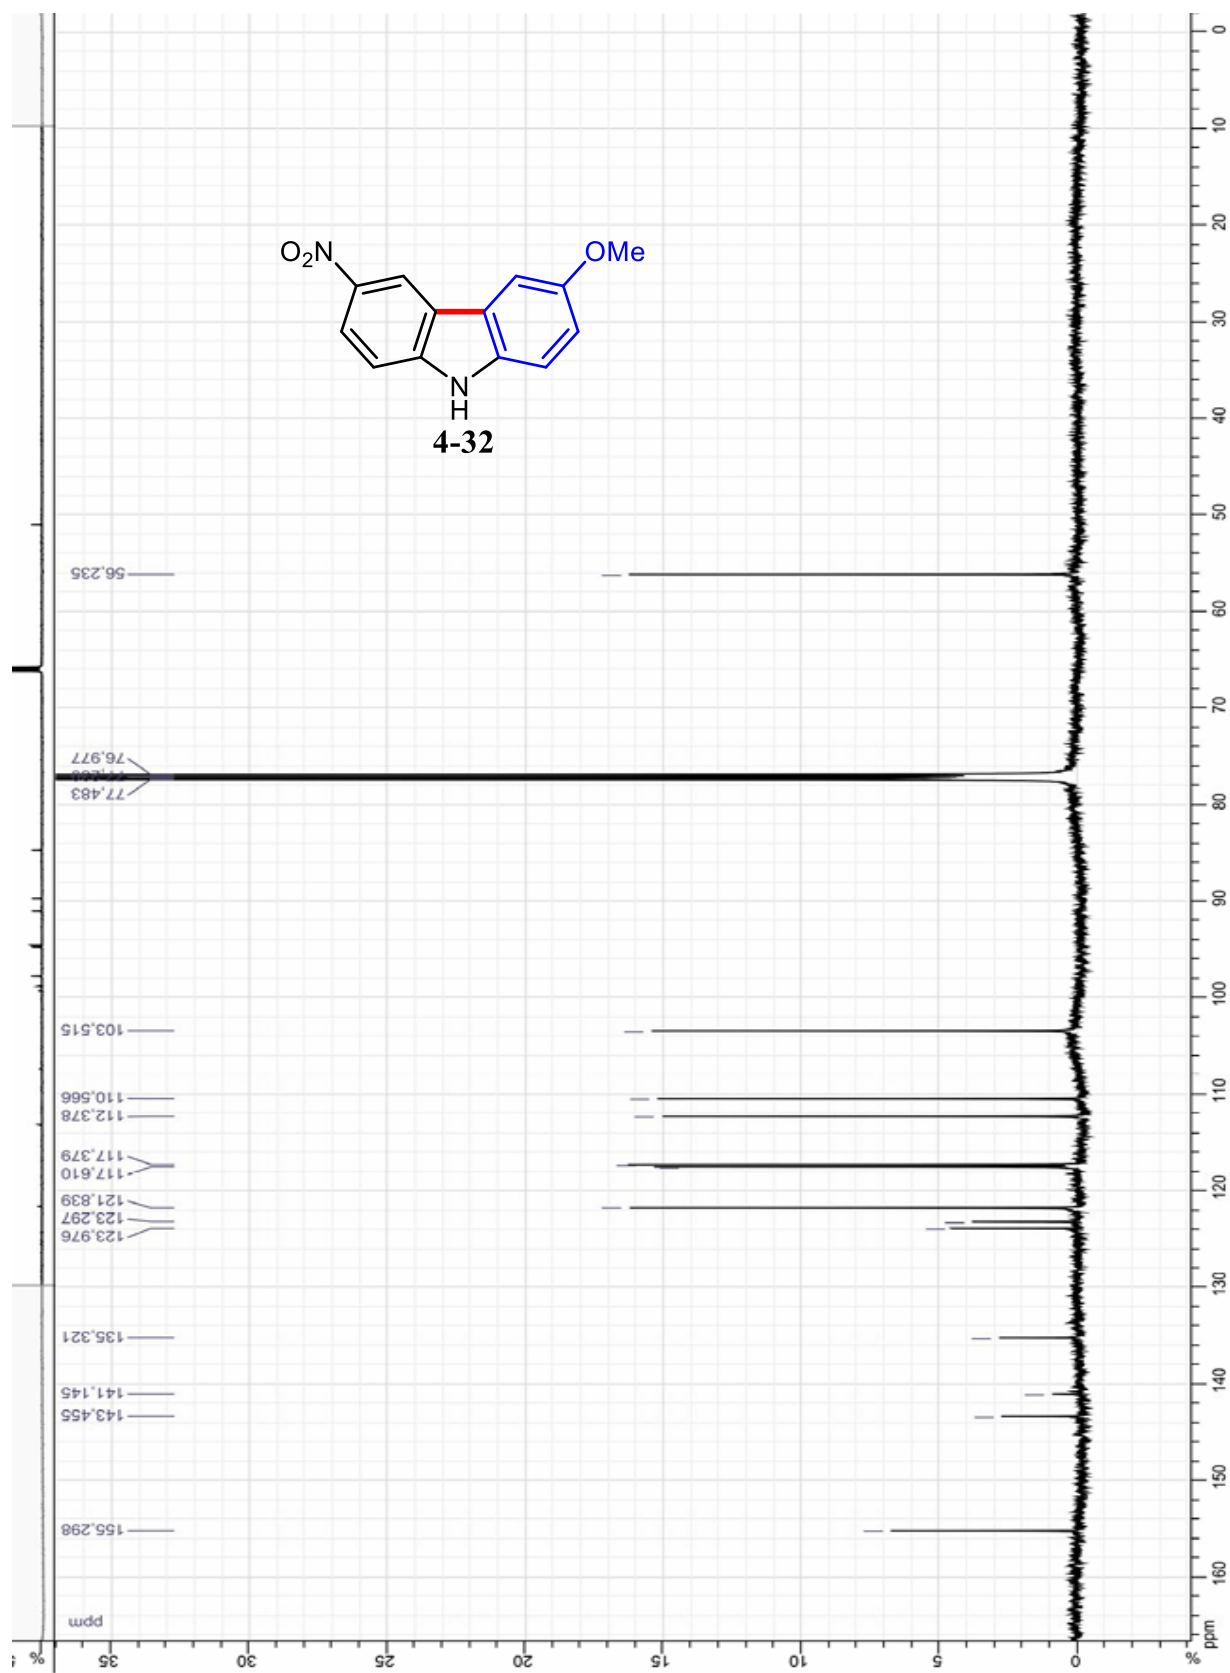

$^1\text{H}$  NMR and  $^{13}\text{C}$  NMR spectra of 3-methoxy-6-methyl-9*H*-carbazole (**4-33**, Glycozoline) in  $\text{CDCl}_3$

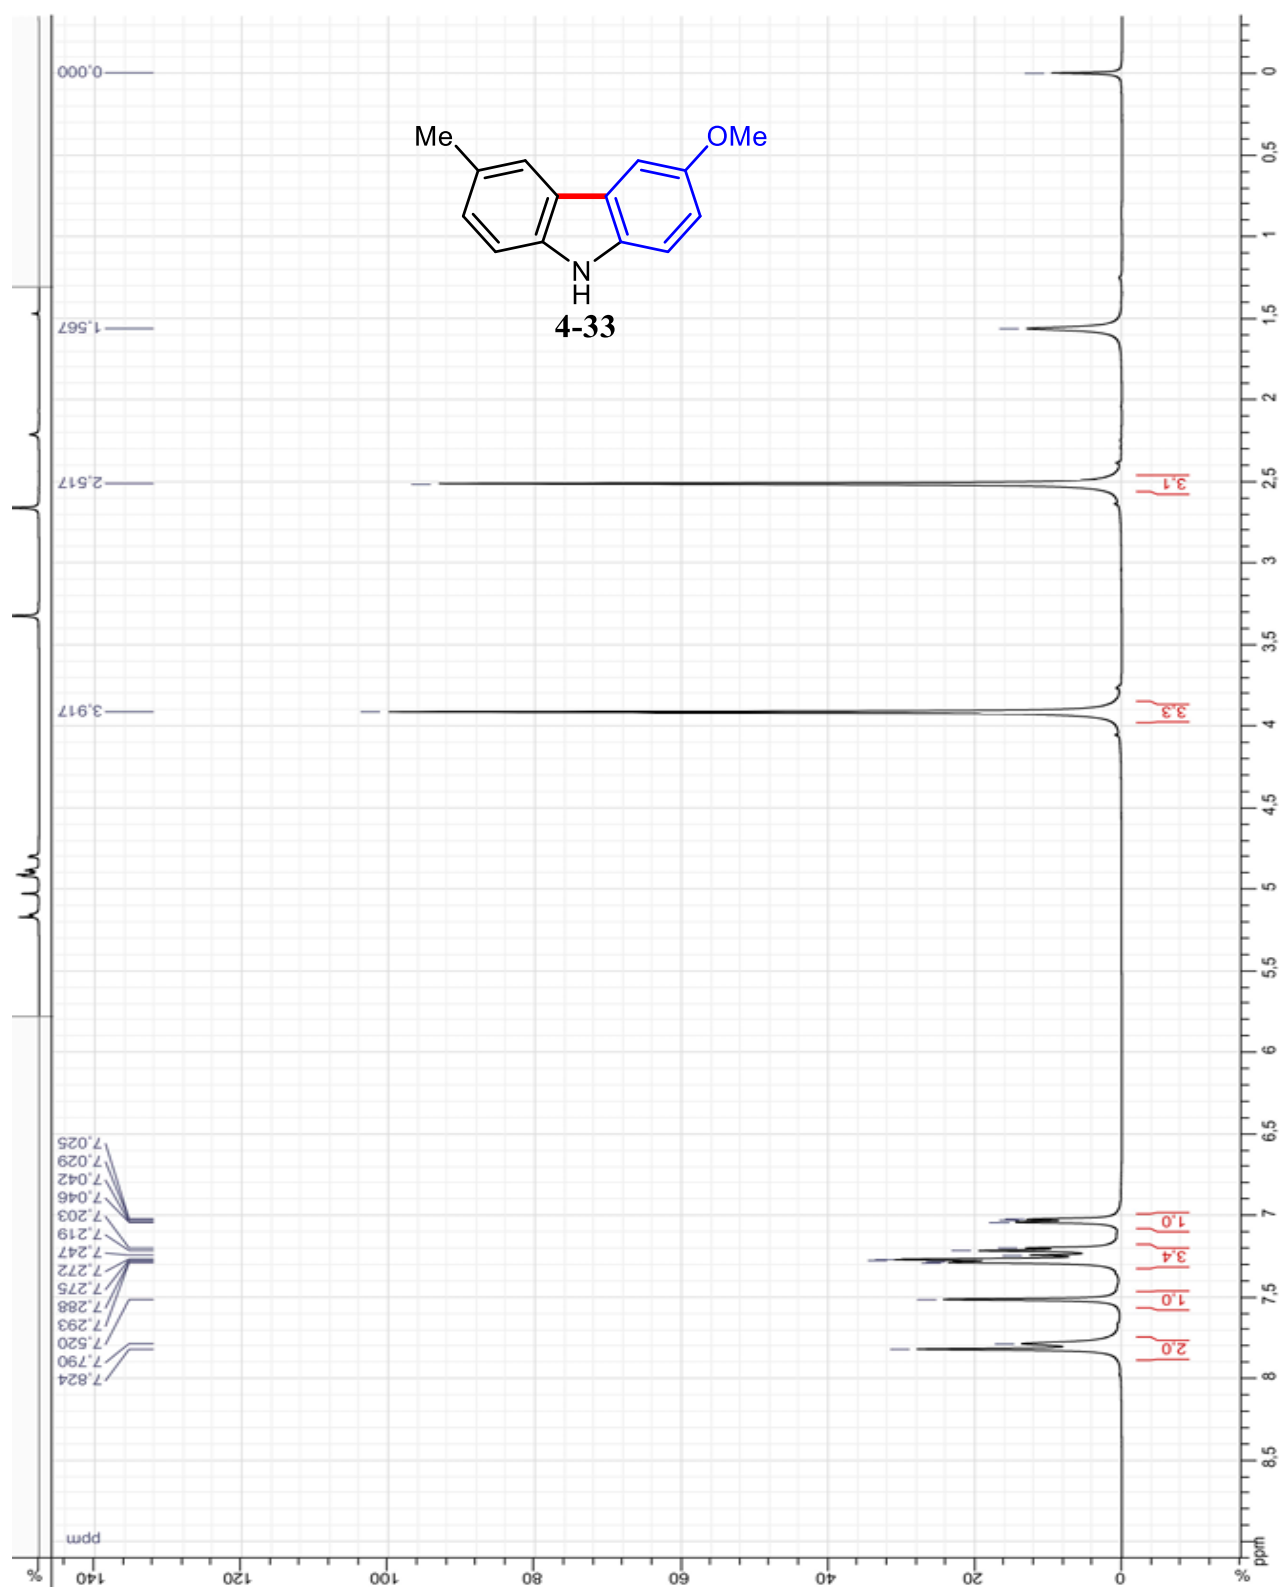



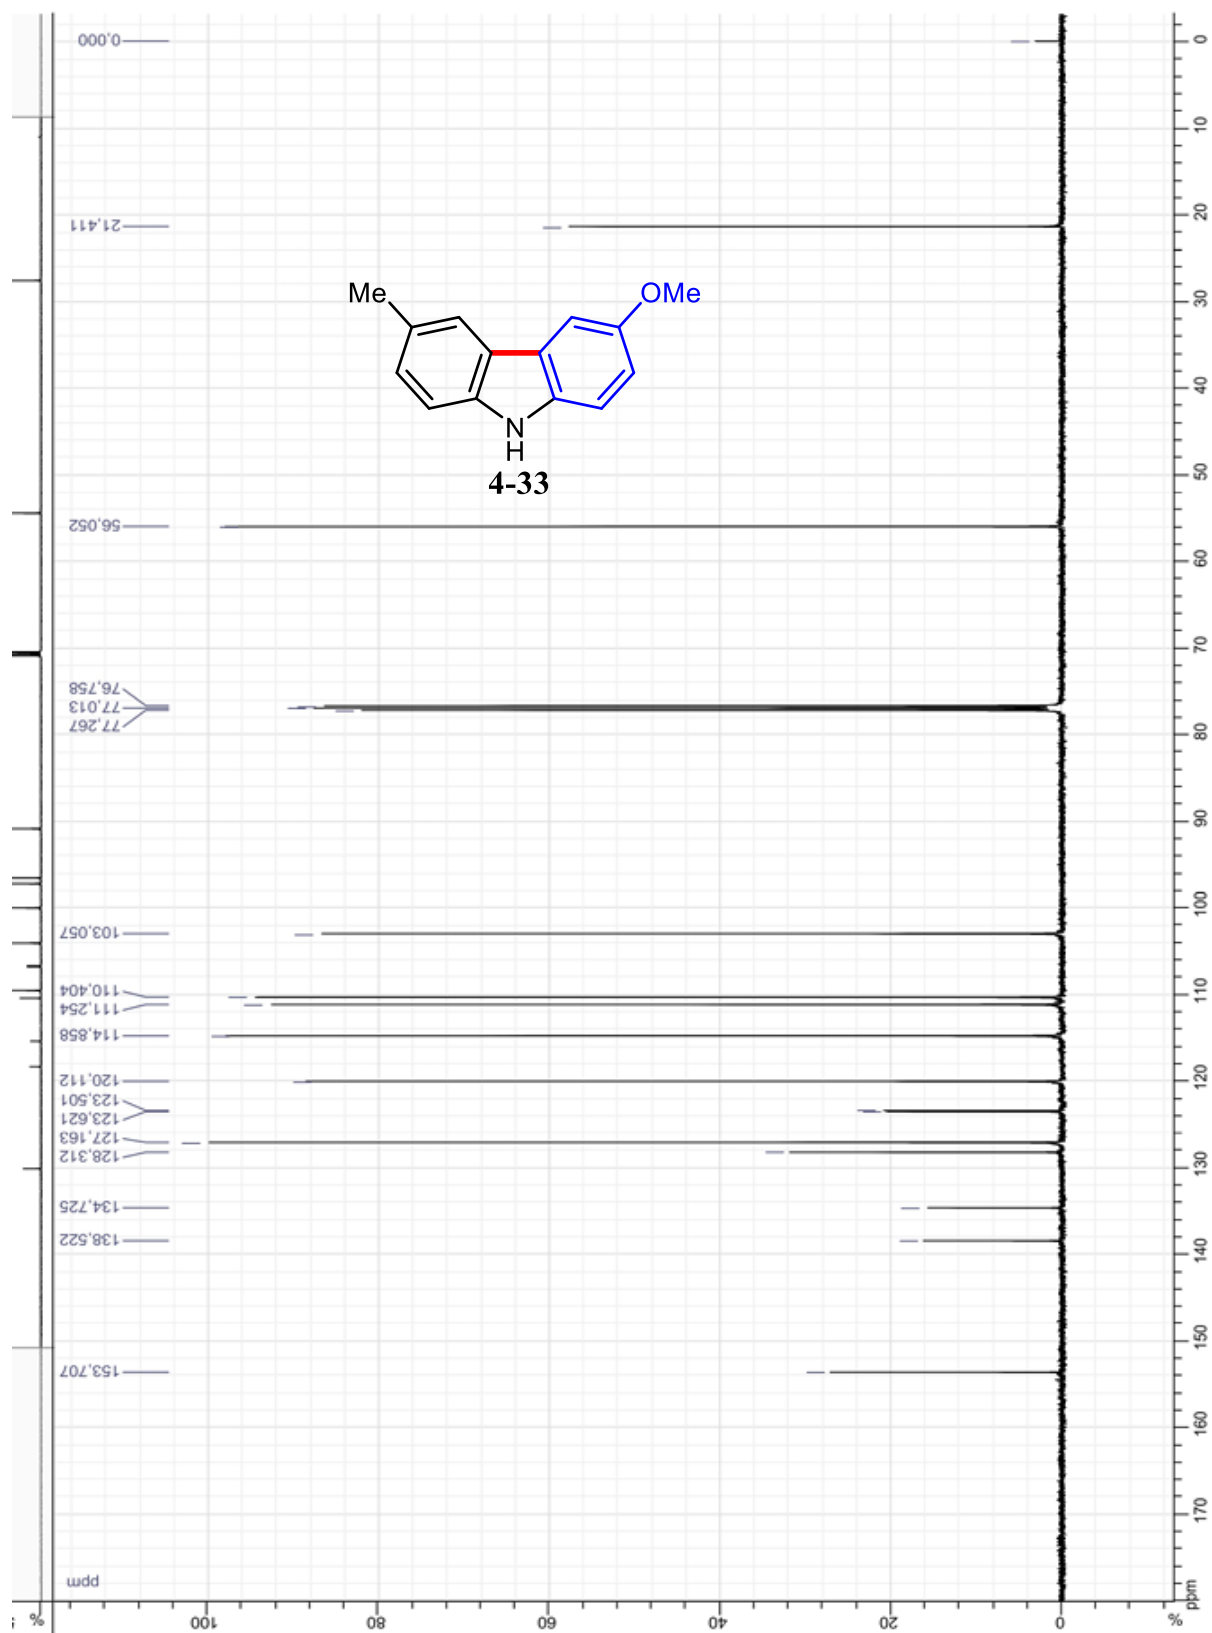



$^1\text{H}$  NMR and  $^{13}\text{C}$  NMR spectra of 1,4-dimethyl-9*H*-carbazole (**4-34**) in  $\text{CDCl}_3$

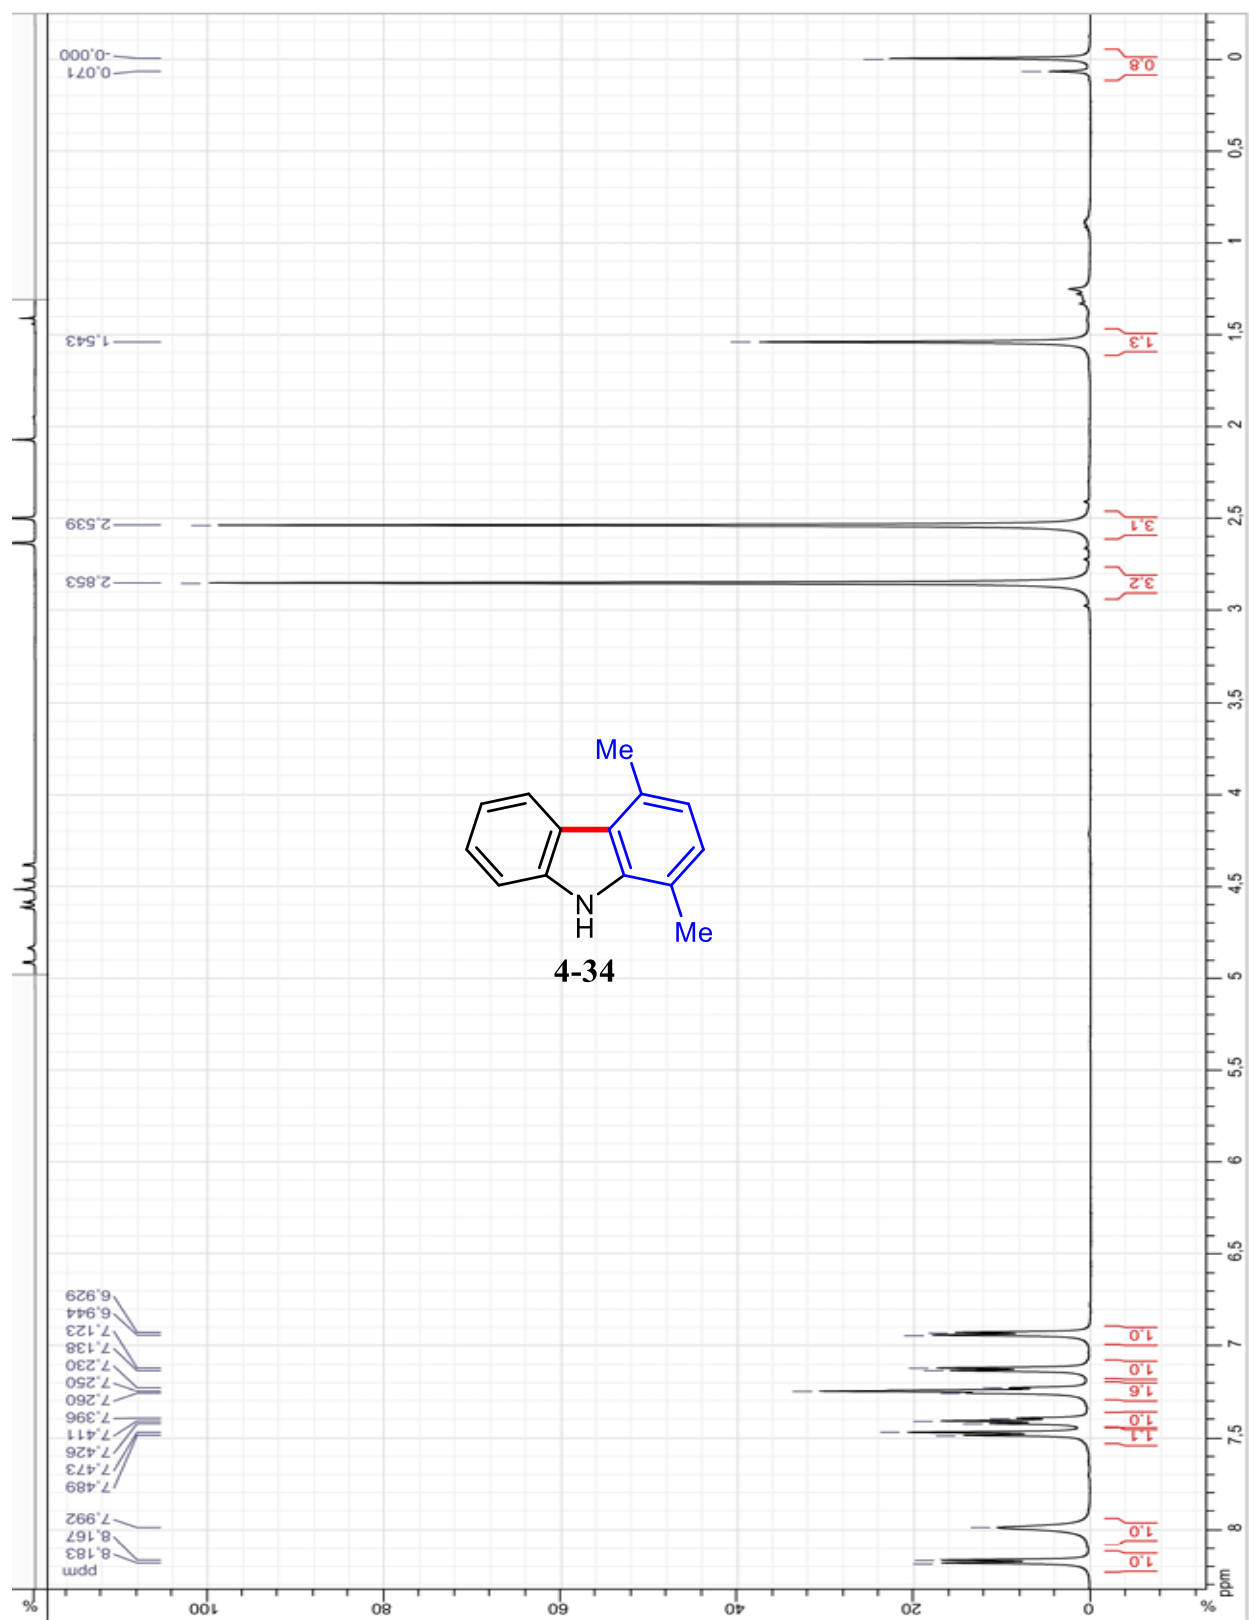

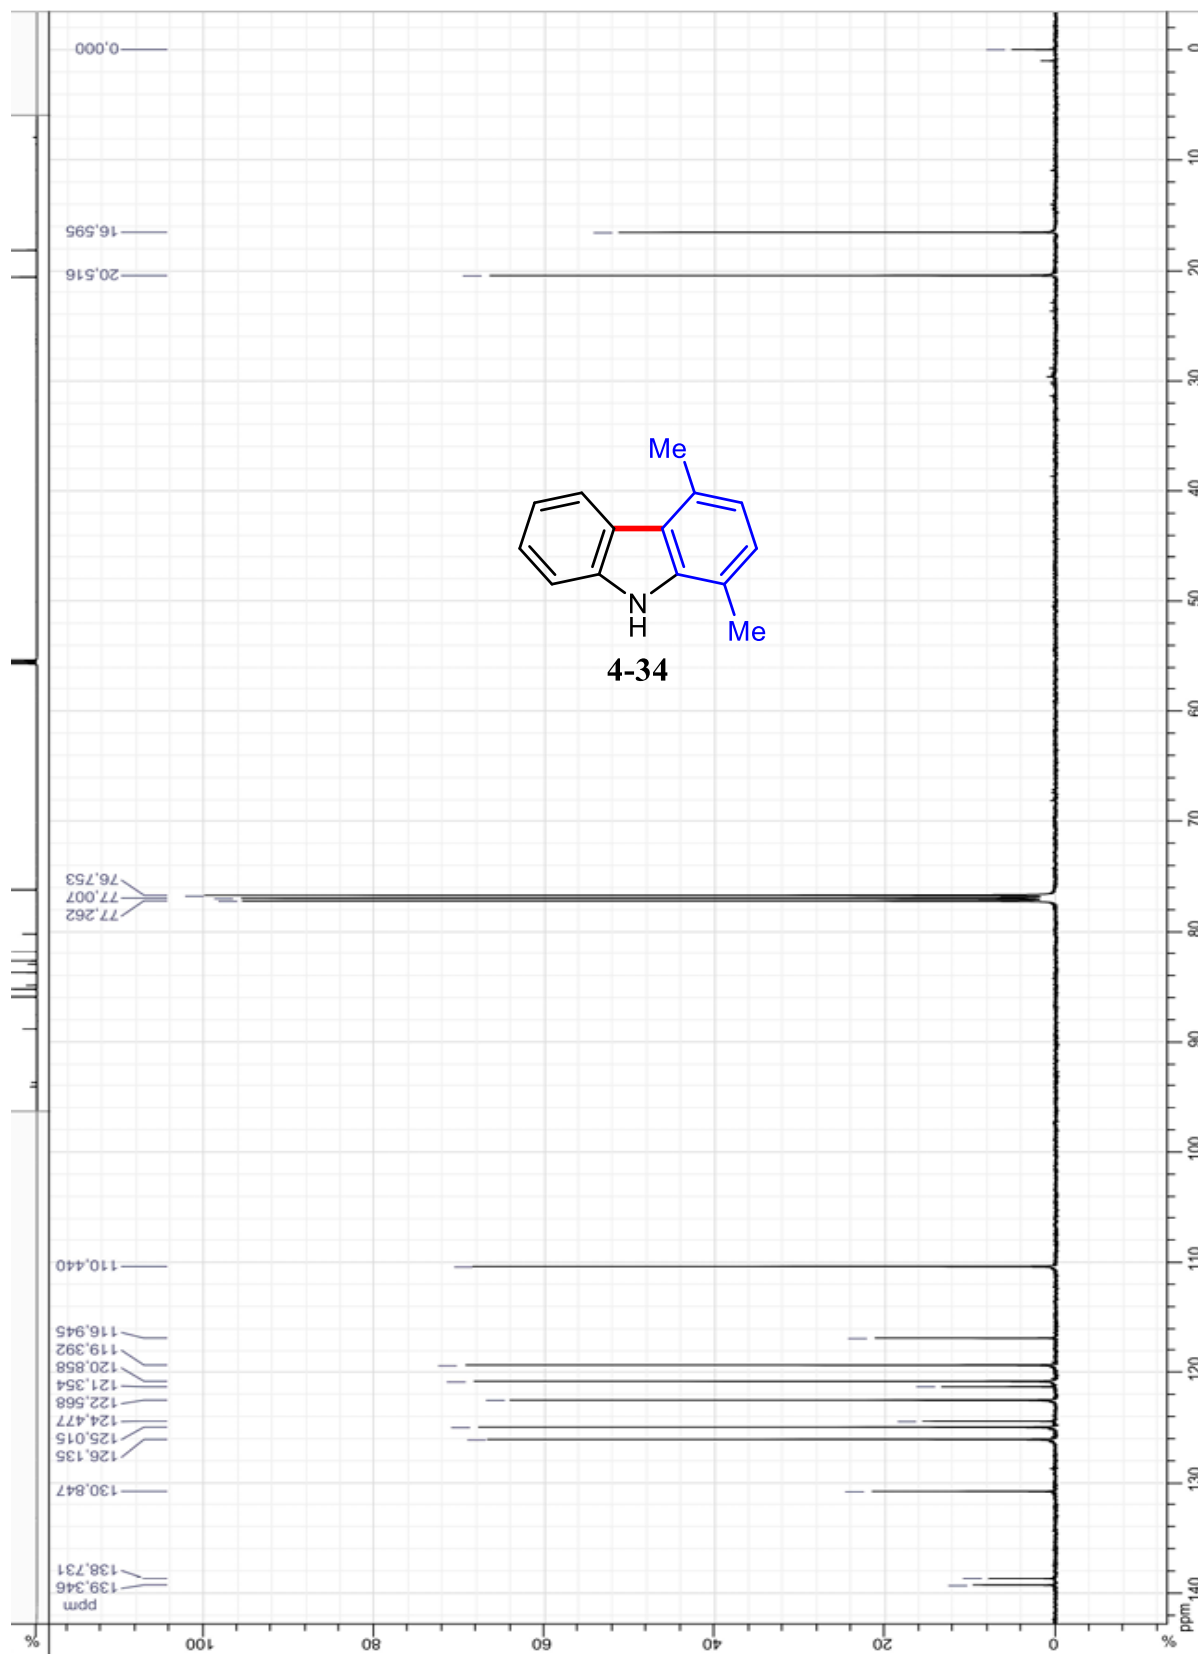

$^1\text{H}$  NMR and  $^{13}\text{C}$  NMR spectra of 6-(*tert*-butyl)-1-methyl-9*H*-carbazole (**4-35**) in  $\text{CDCl}_3$

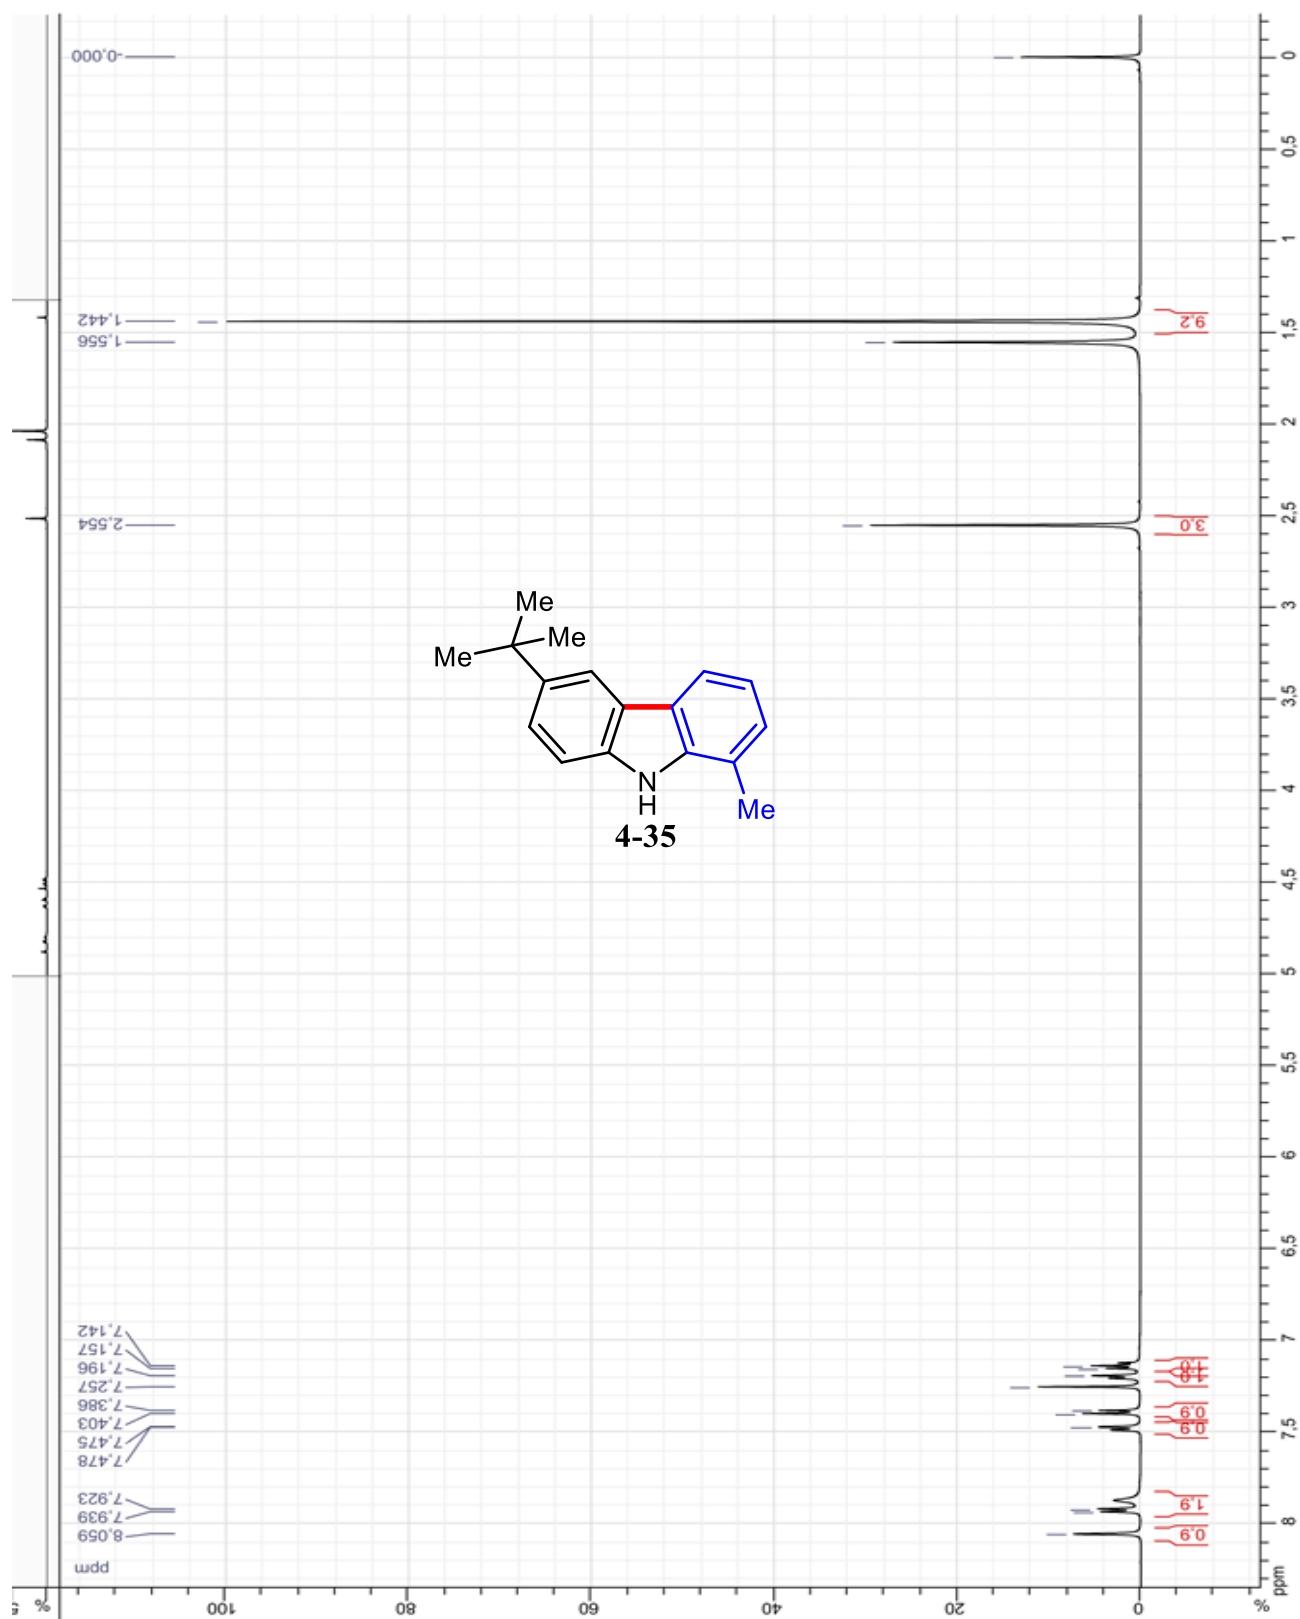

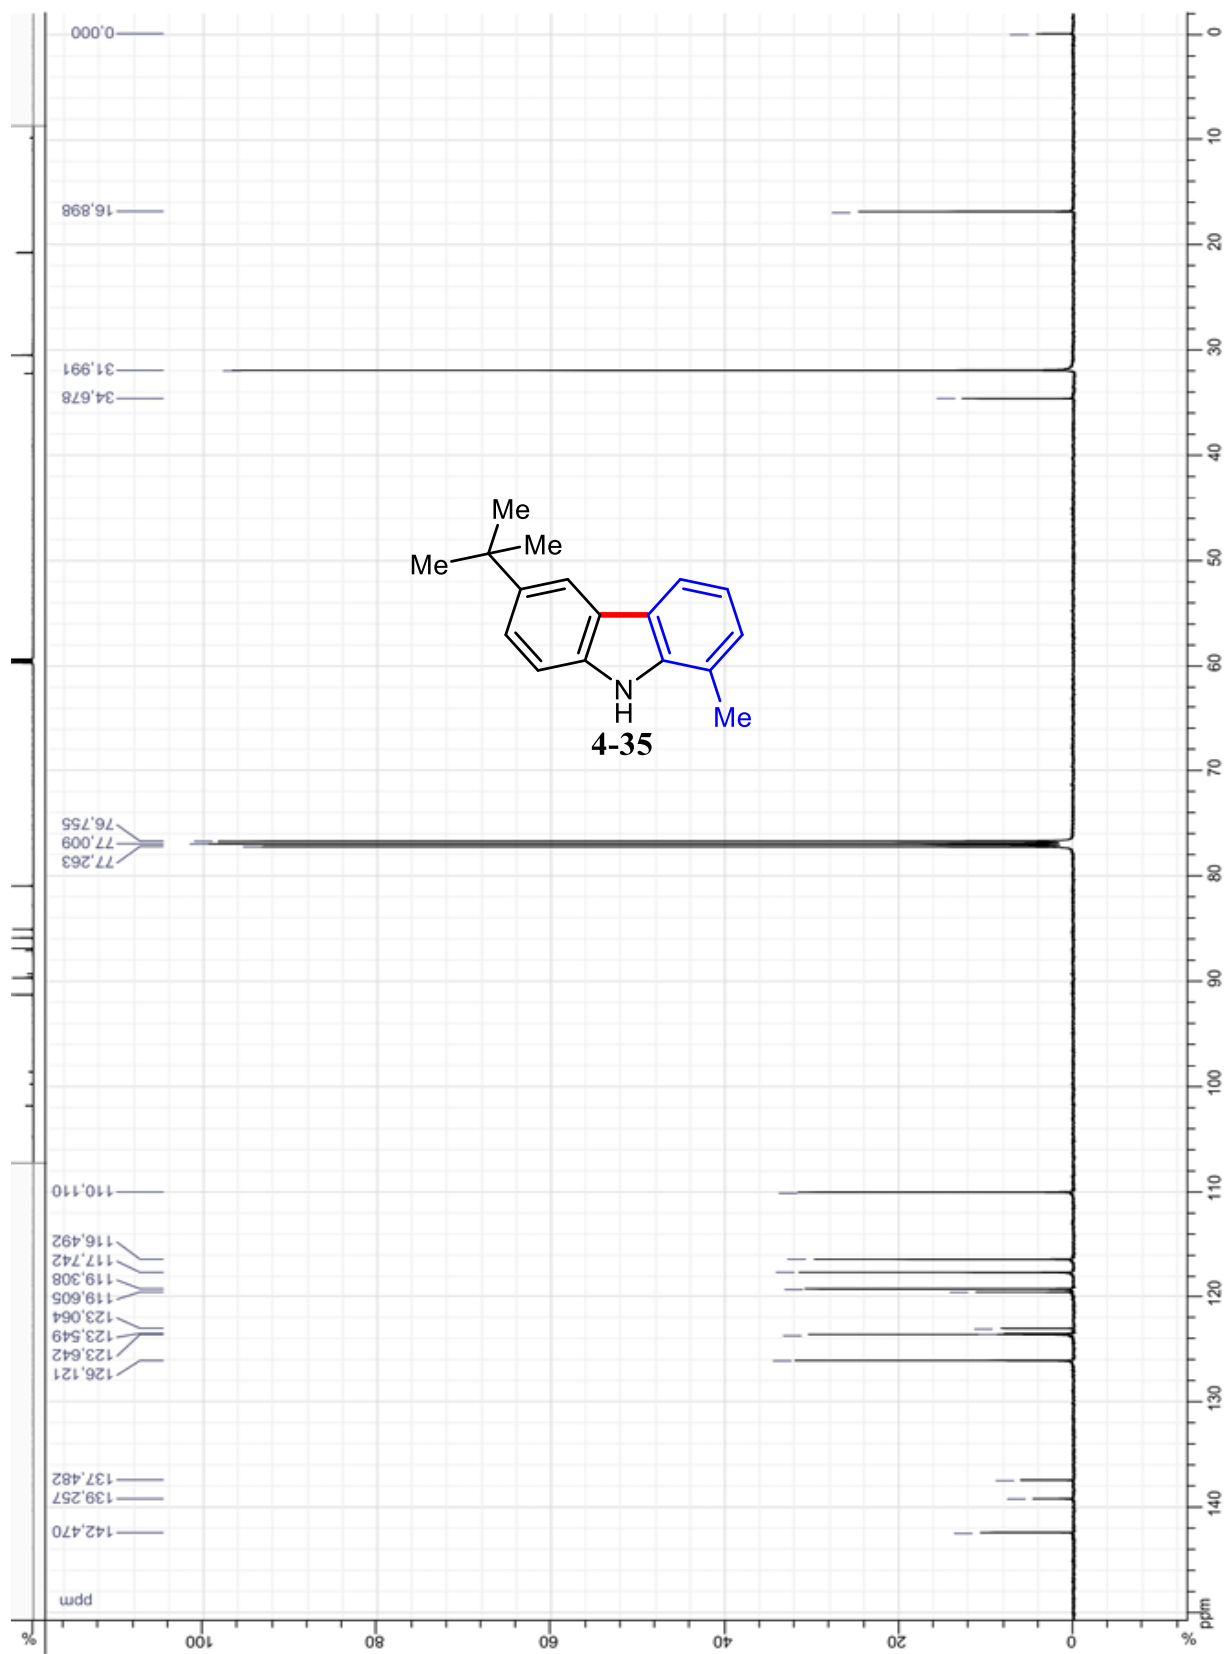

$^1\text{H}$  NMR and  $^{13}\text{C}$  NMR spectra of 7*H*-benzo[*c*]carbazole (**4-36**) in DMSO- $\text{D}_6$

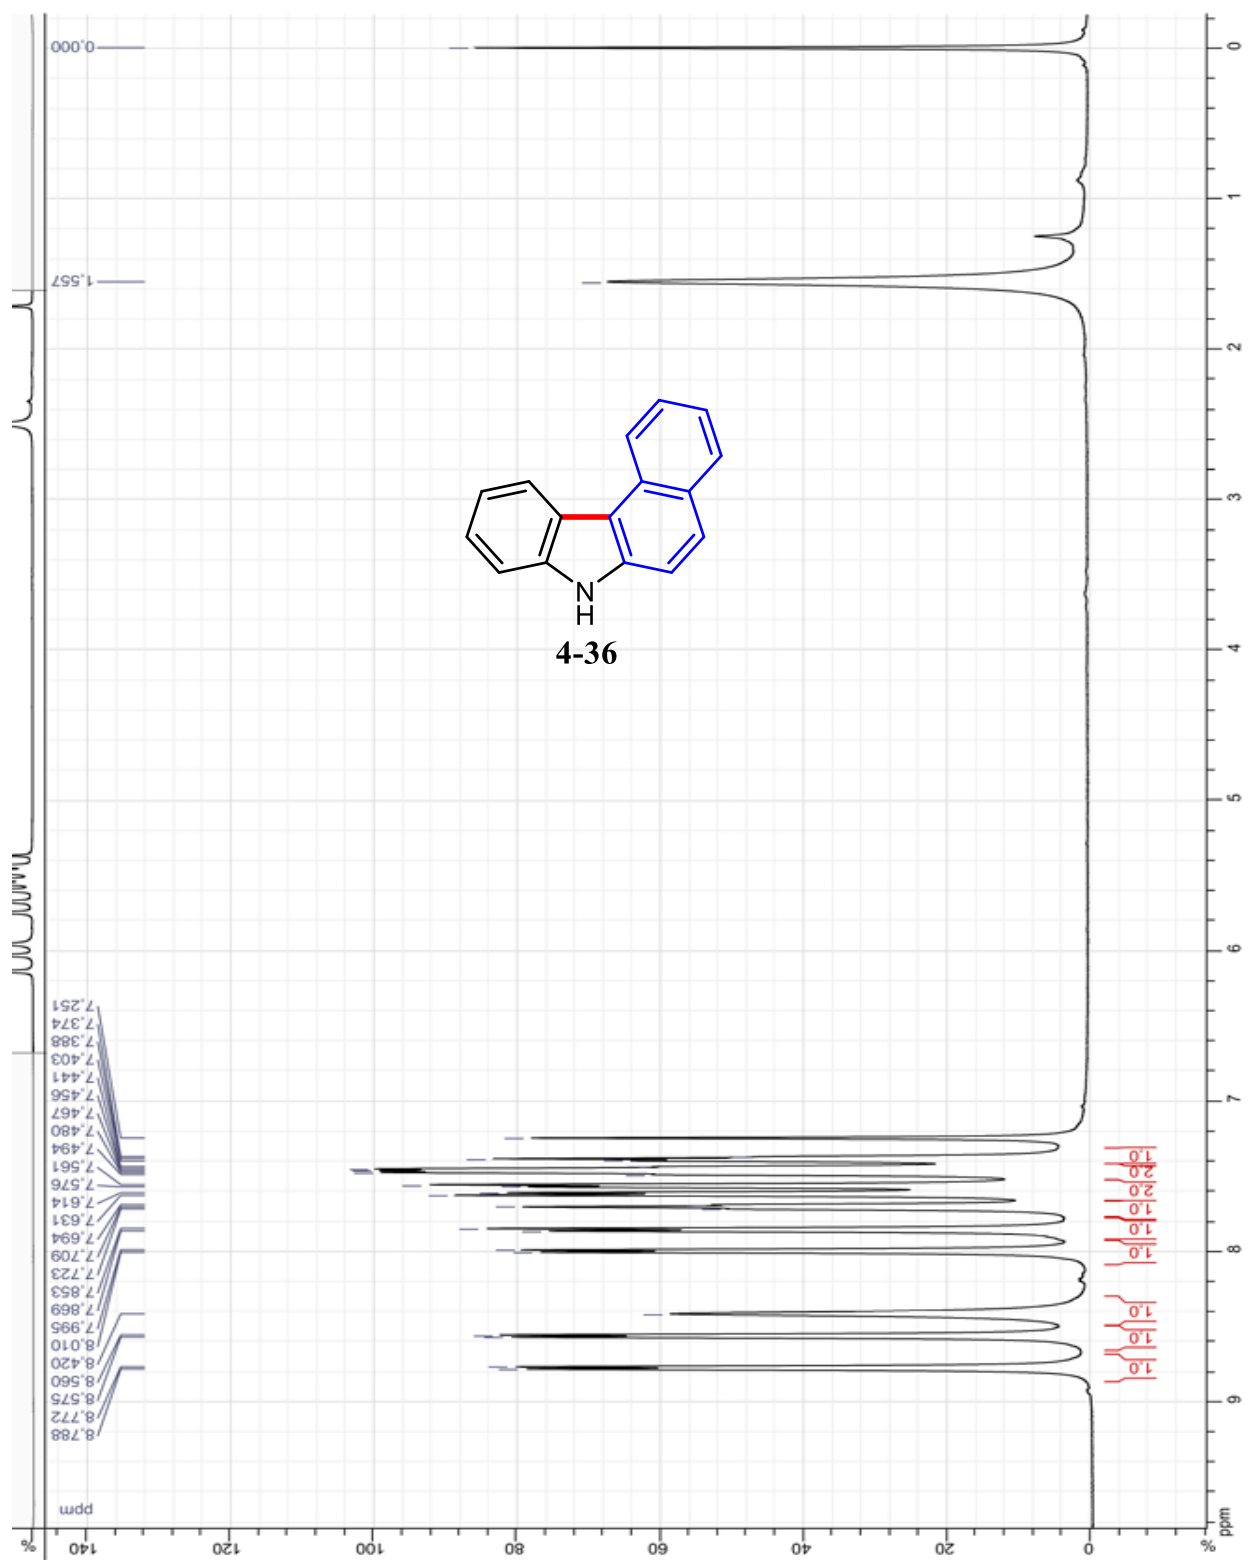

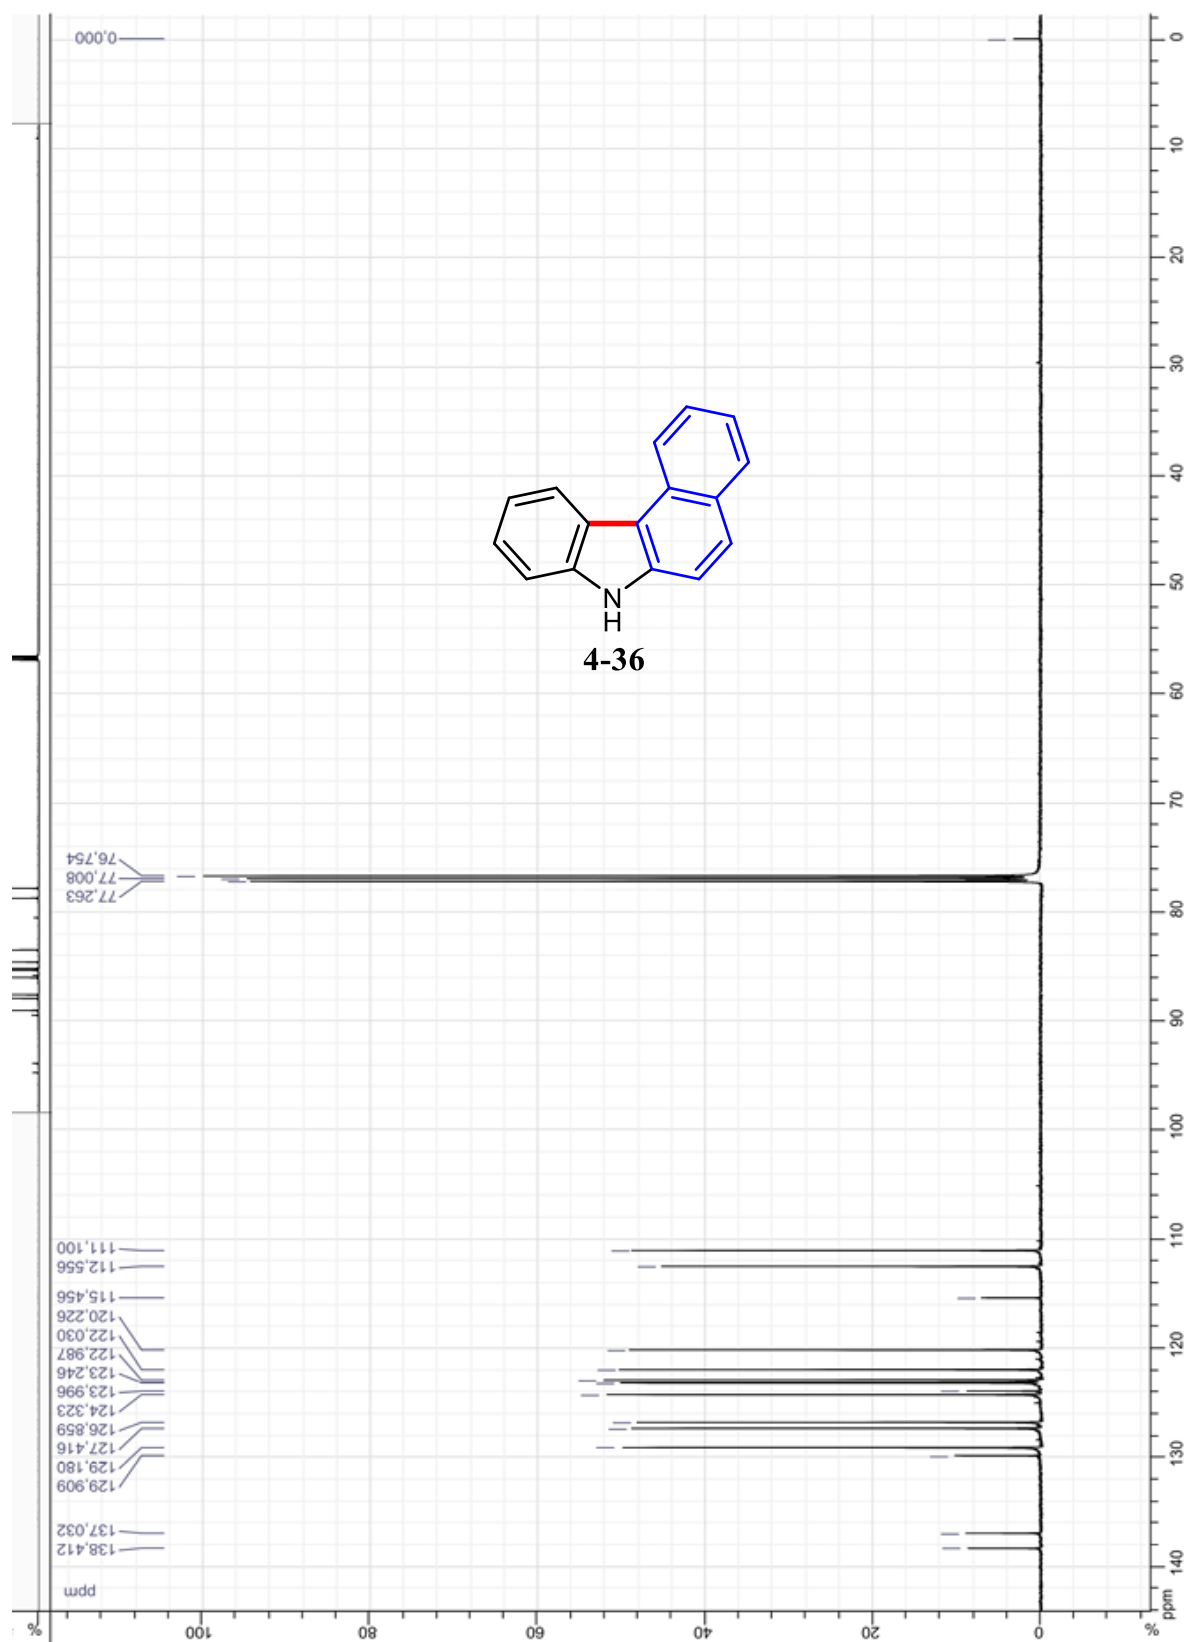

$^1\text{H}$  NMR and  $^{13}\text{C}$  NMR spectra of 10-methyl-7*H*-benzo[*c*]carbazole (**4-37**) in  $\text{DMSO-}D_6$

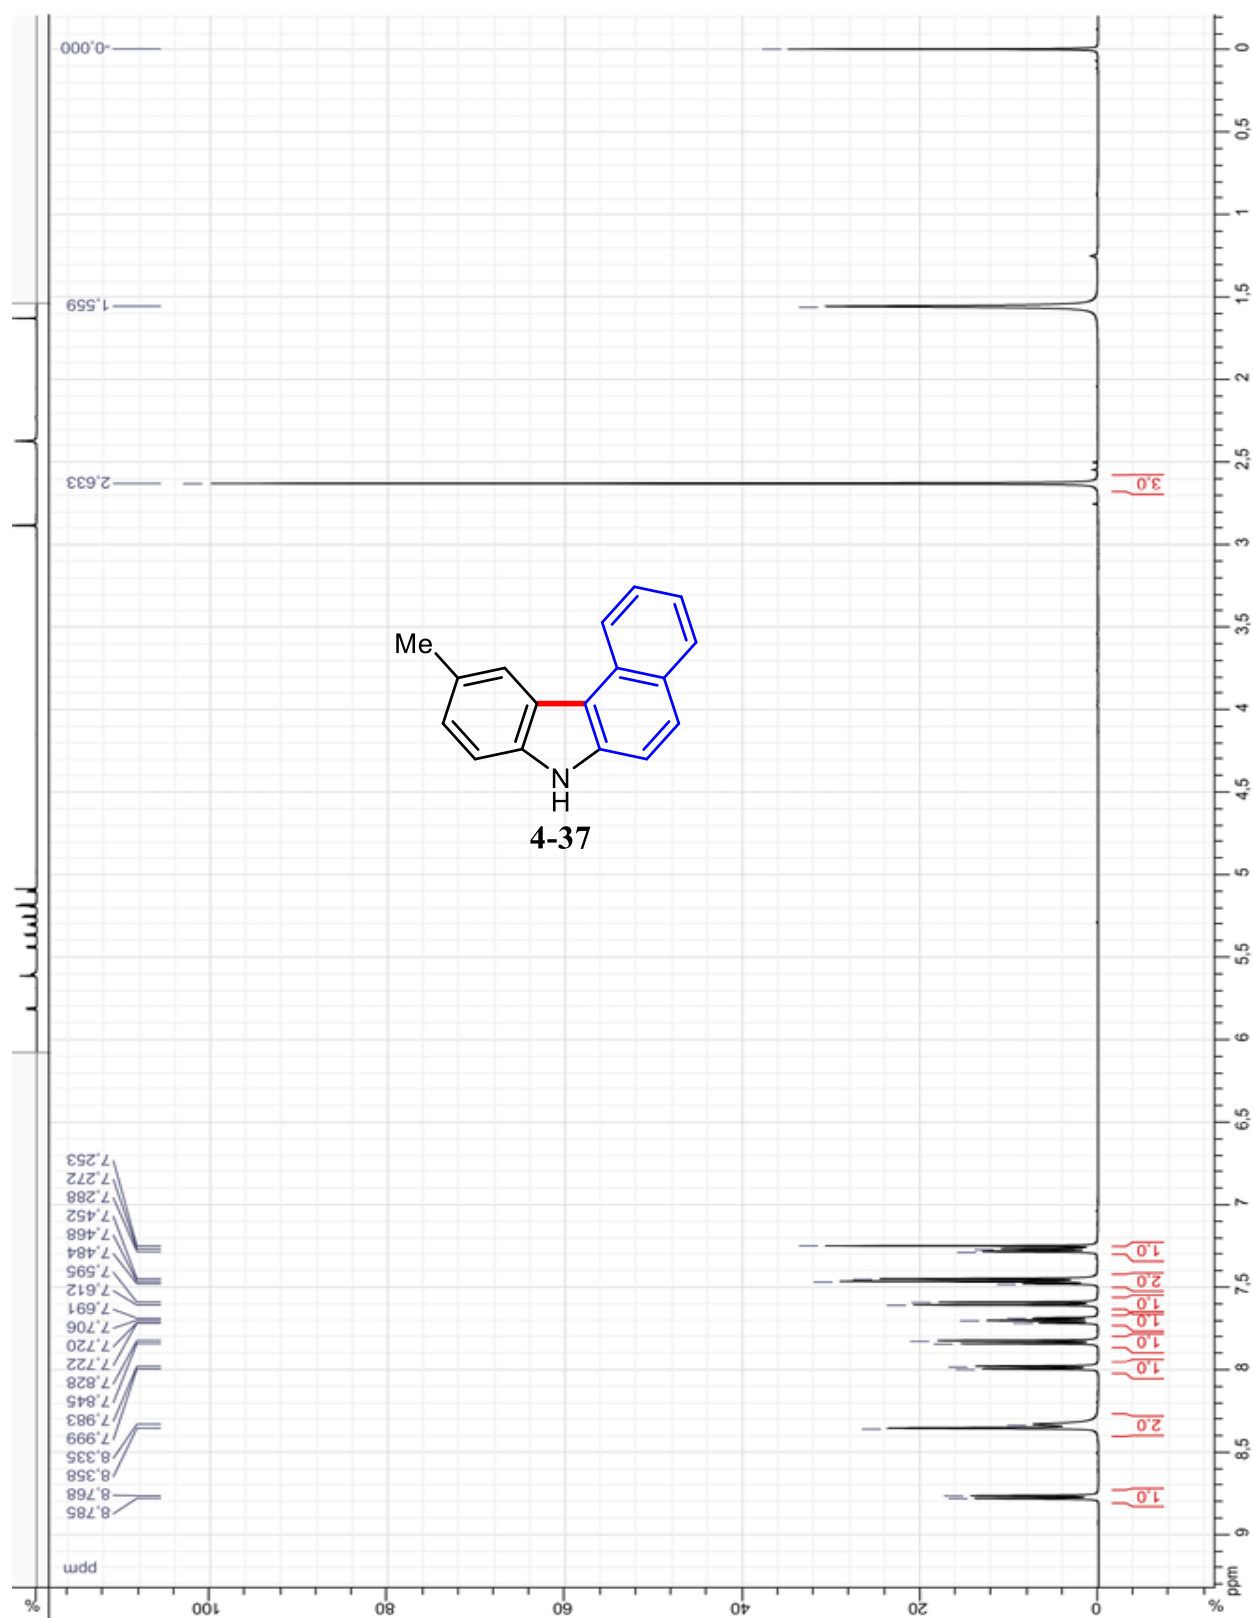

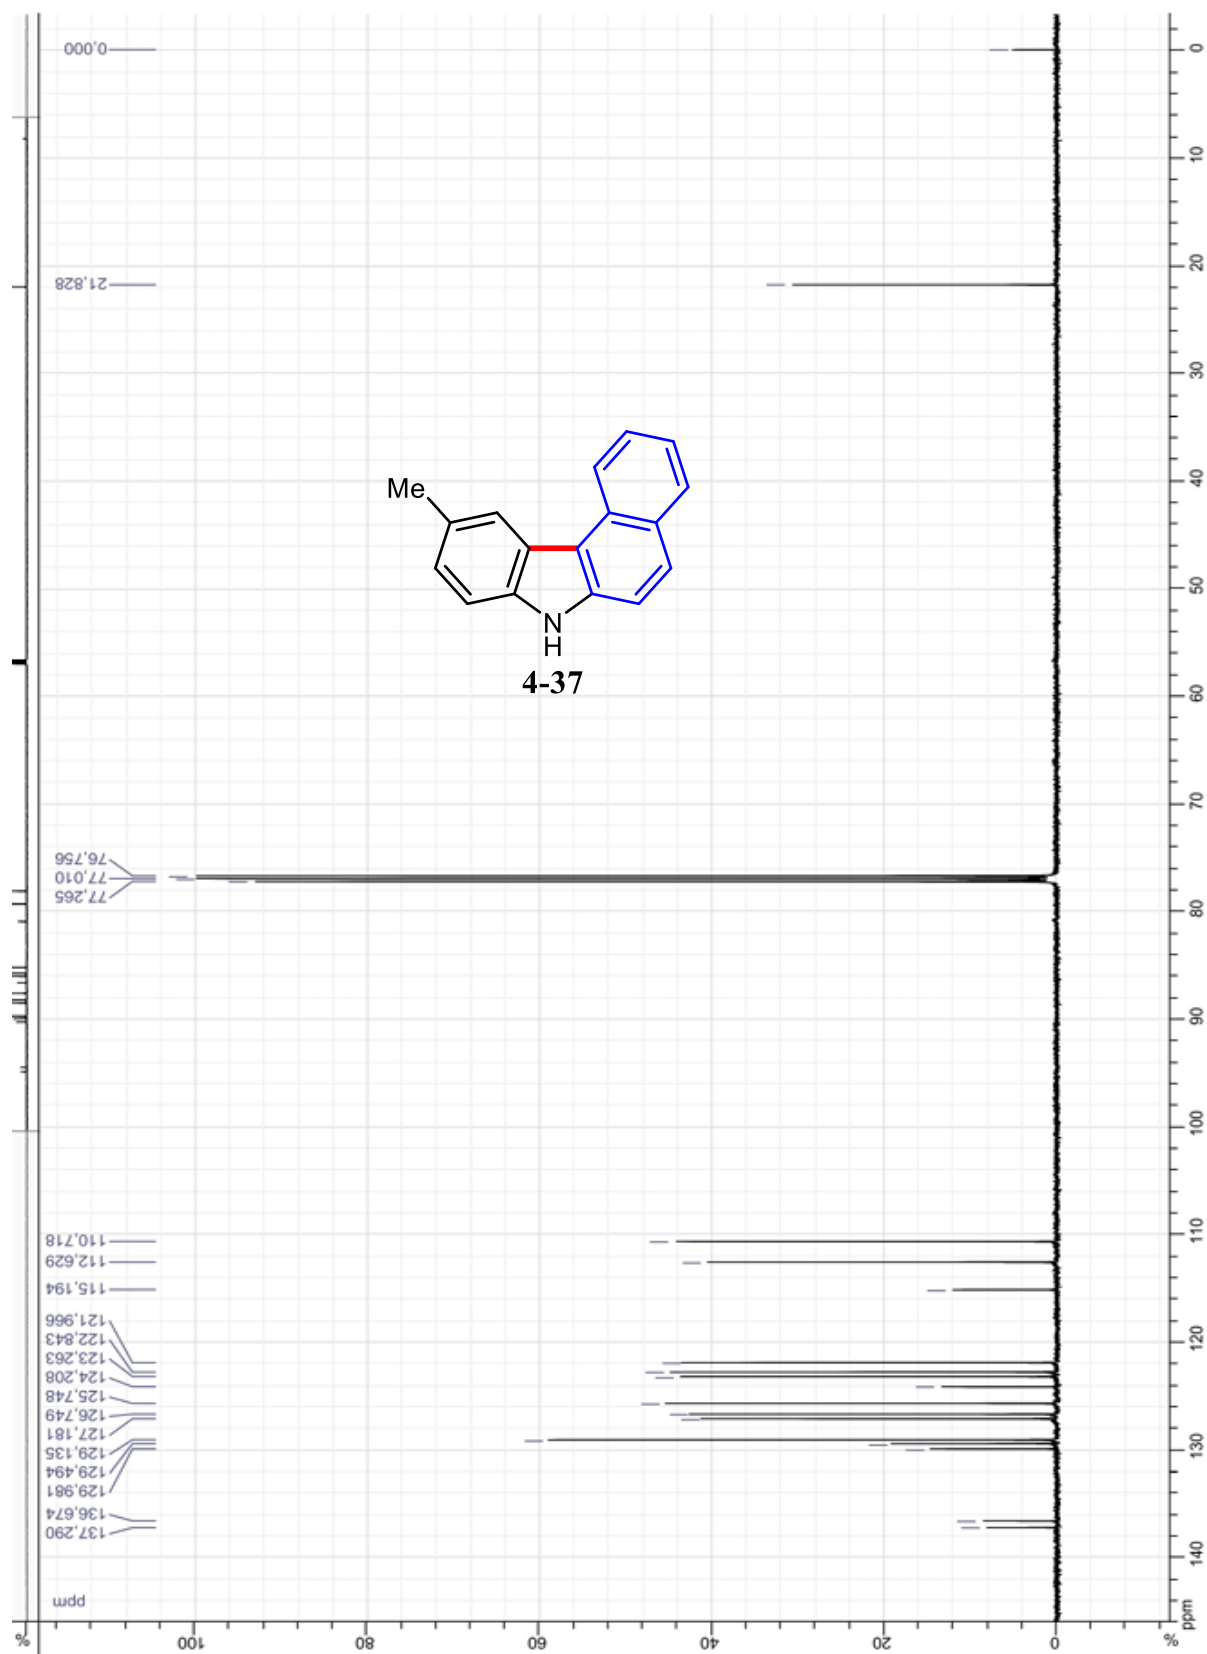



**Chemical Structure of 4-38:** c1ccc2c(c1)c(c3ccccc3n2)C4=CC=CC=C4

**<sup>1</sup>H NMR Spectrum (CDCl<sub>3</sub>):**

| Chemical Shift (ppm)                                                                                    | Integration |
|---------------------------------------------------------------------------------------------------------|-------------|
| 8.793, 8.152, 8.140, 8.135, 8.124, 8.022, 8.006                                                         | 1.0         |
| 7.674, 7.657, 7.612, 7.599, 7.583, 7.551, 7.536, 7.521, 7.455, 7.441, 7.425, 7.324, 7.310, 7.295, 7.252 | 3.0         |
| 1.561, 1.253                                                                                            | 1.0         |

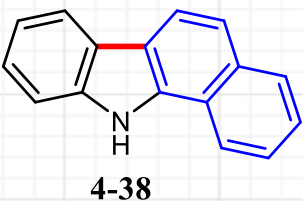

$^1\text{H}$  NMR and  $^{13}\text{C}$  NMR spectra of 8-methyl-11*H*-benzo[*a*]carbazole (**4-39**) in  $\text{CDCl}_3$

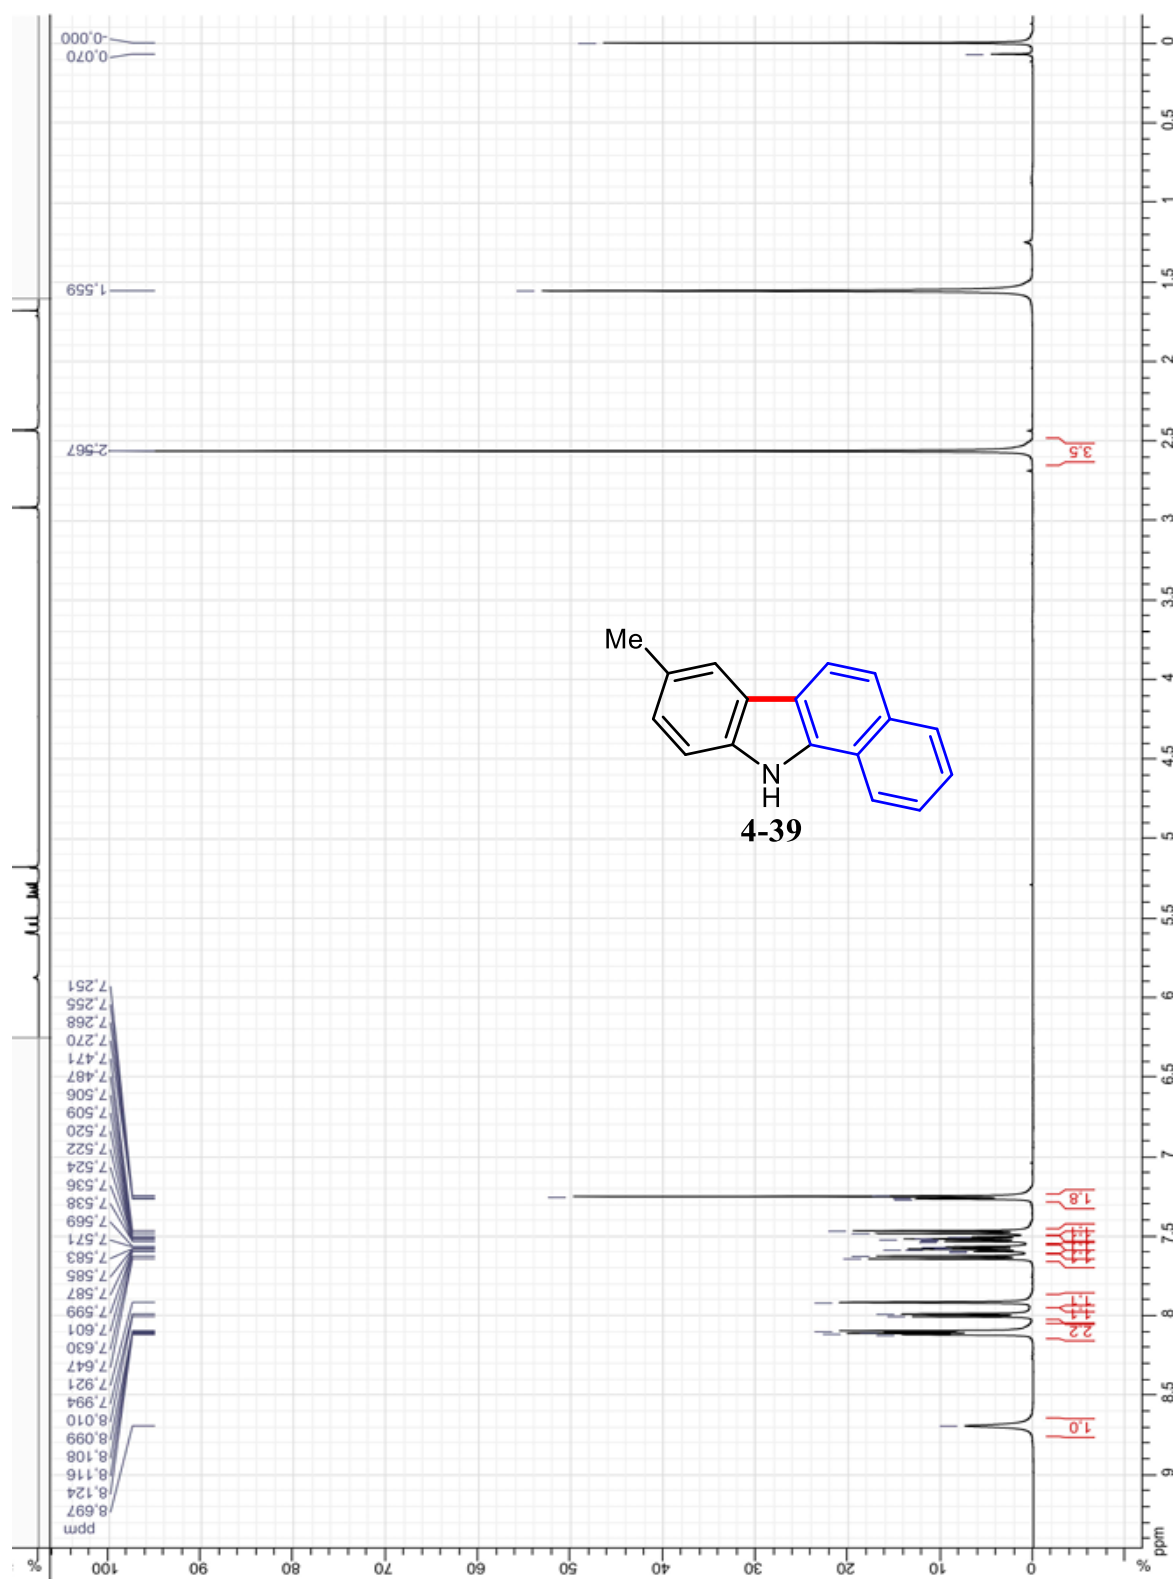

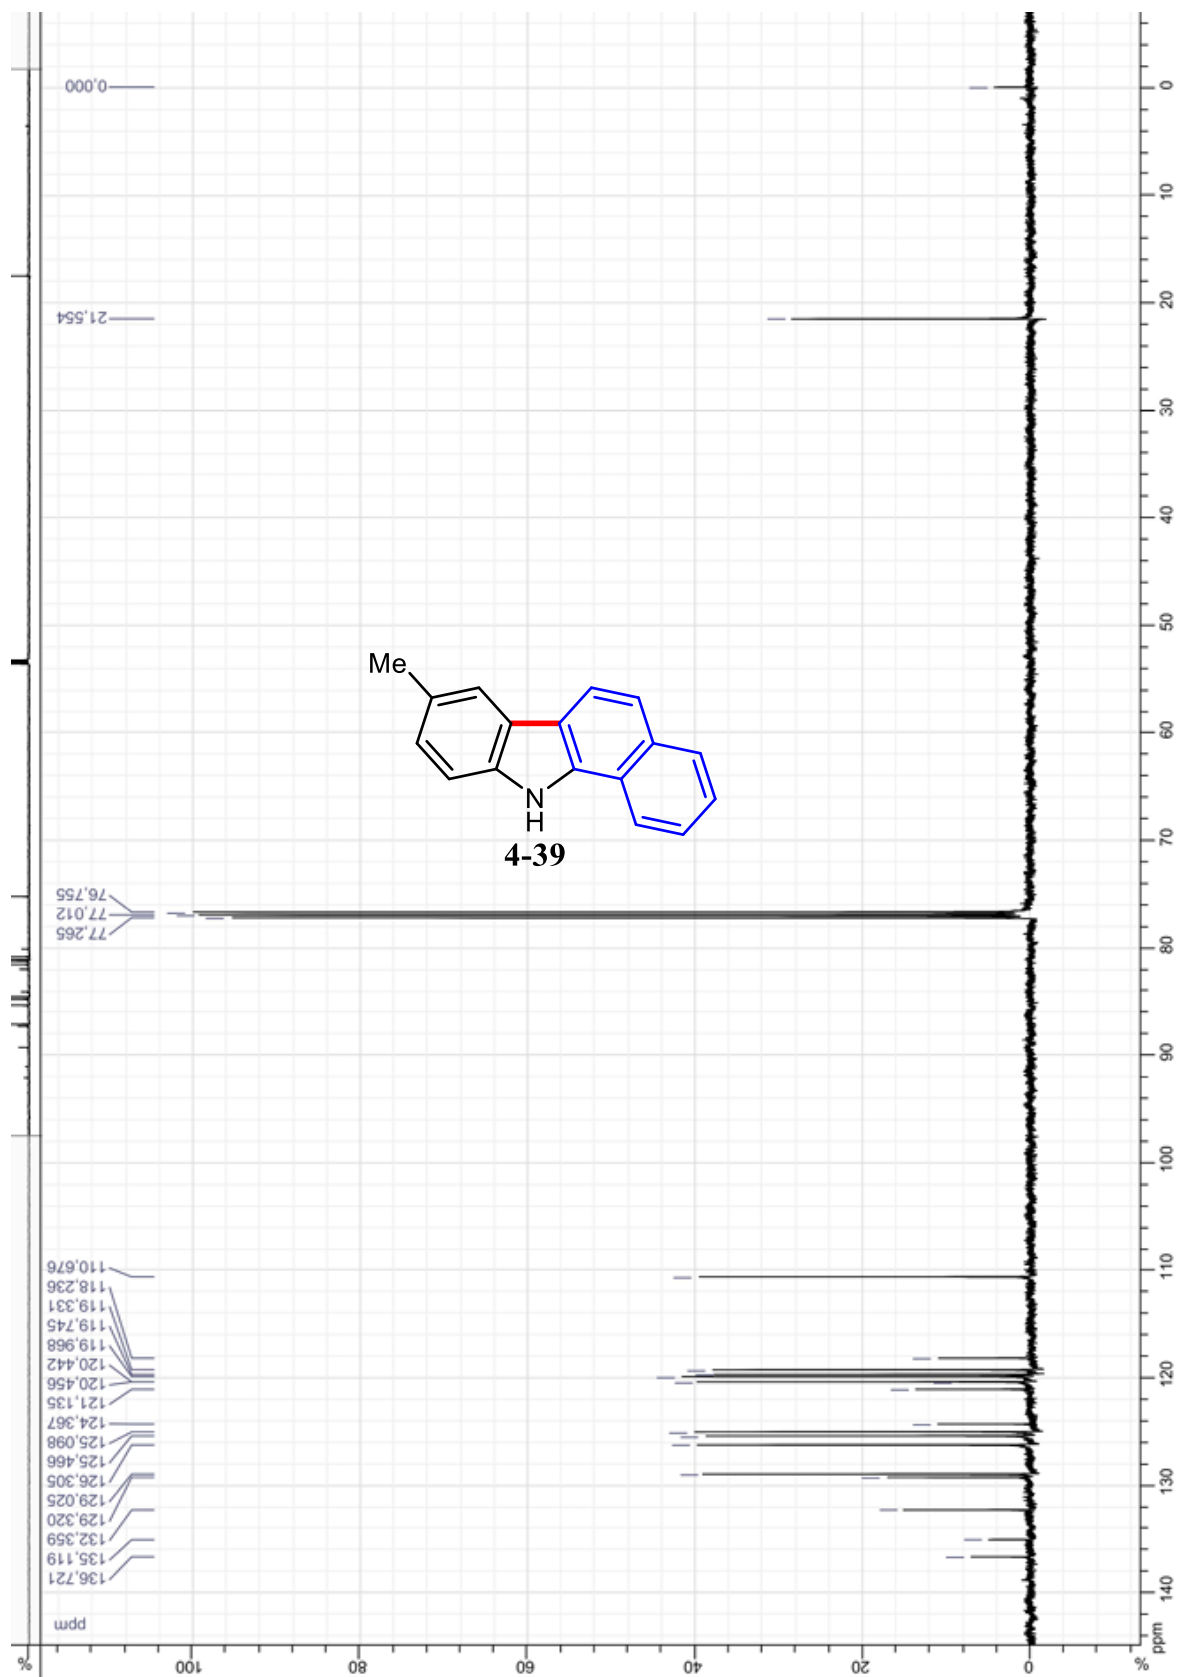

$^1\text{H}$  NMR and  $^{13}\text{C}$  NMR spectra of methyl 2-methoxy-9*H*-carbazole-3-carboxylate (**4-40**) in  $\text{CDCl}_3$

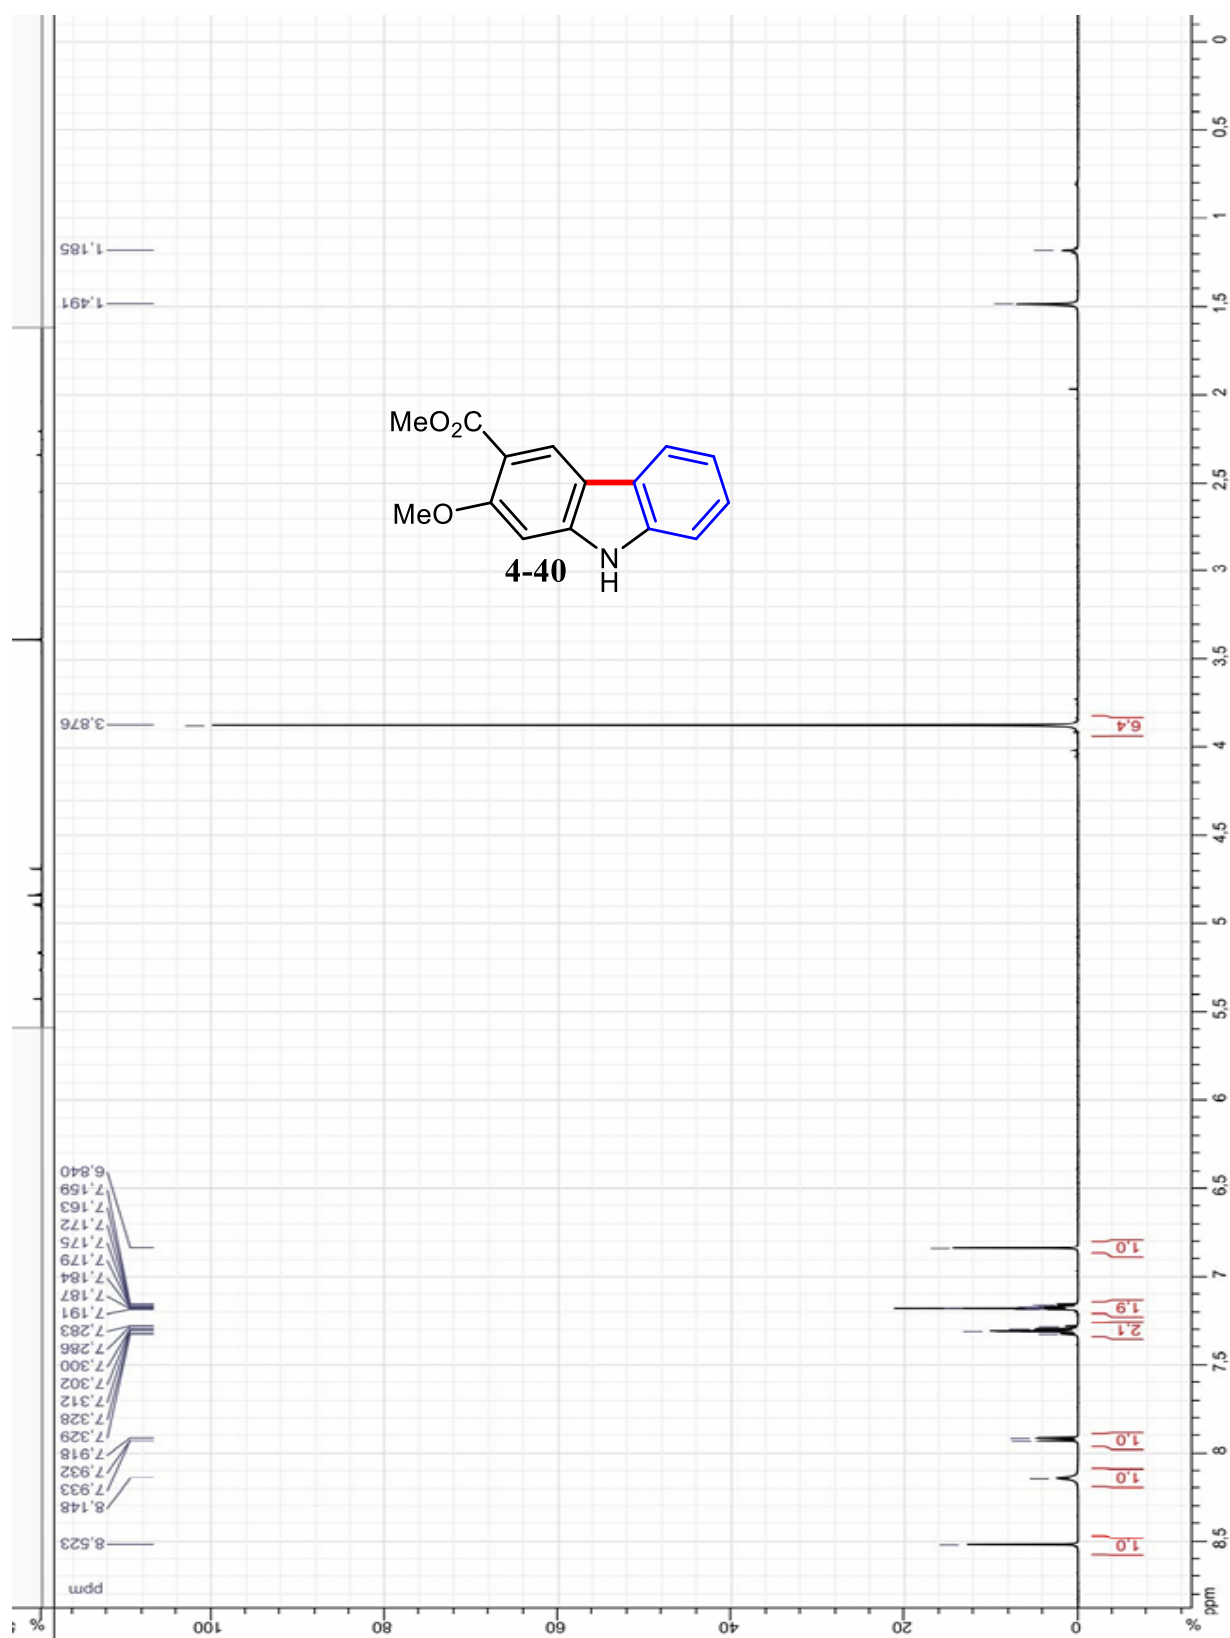

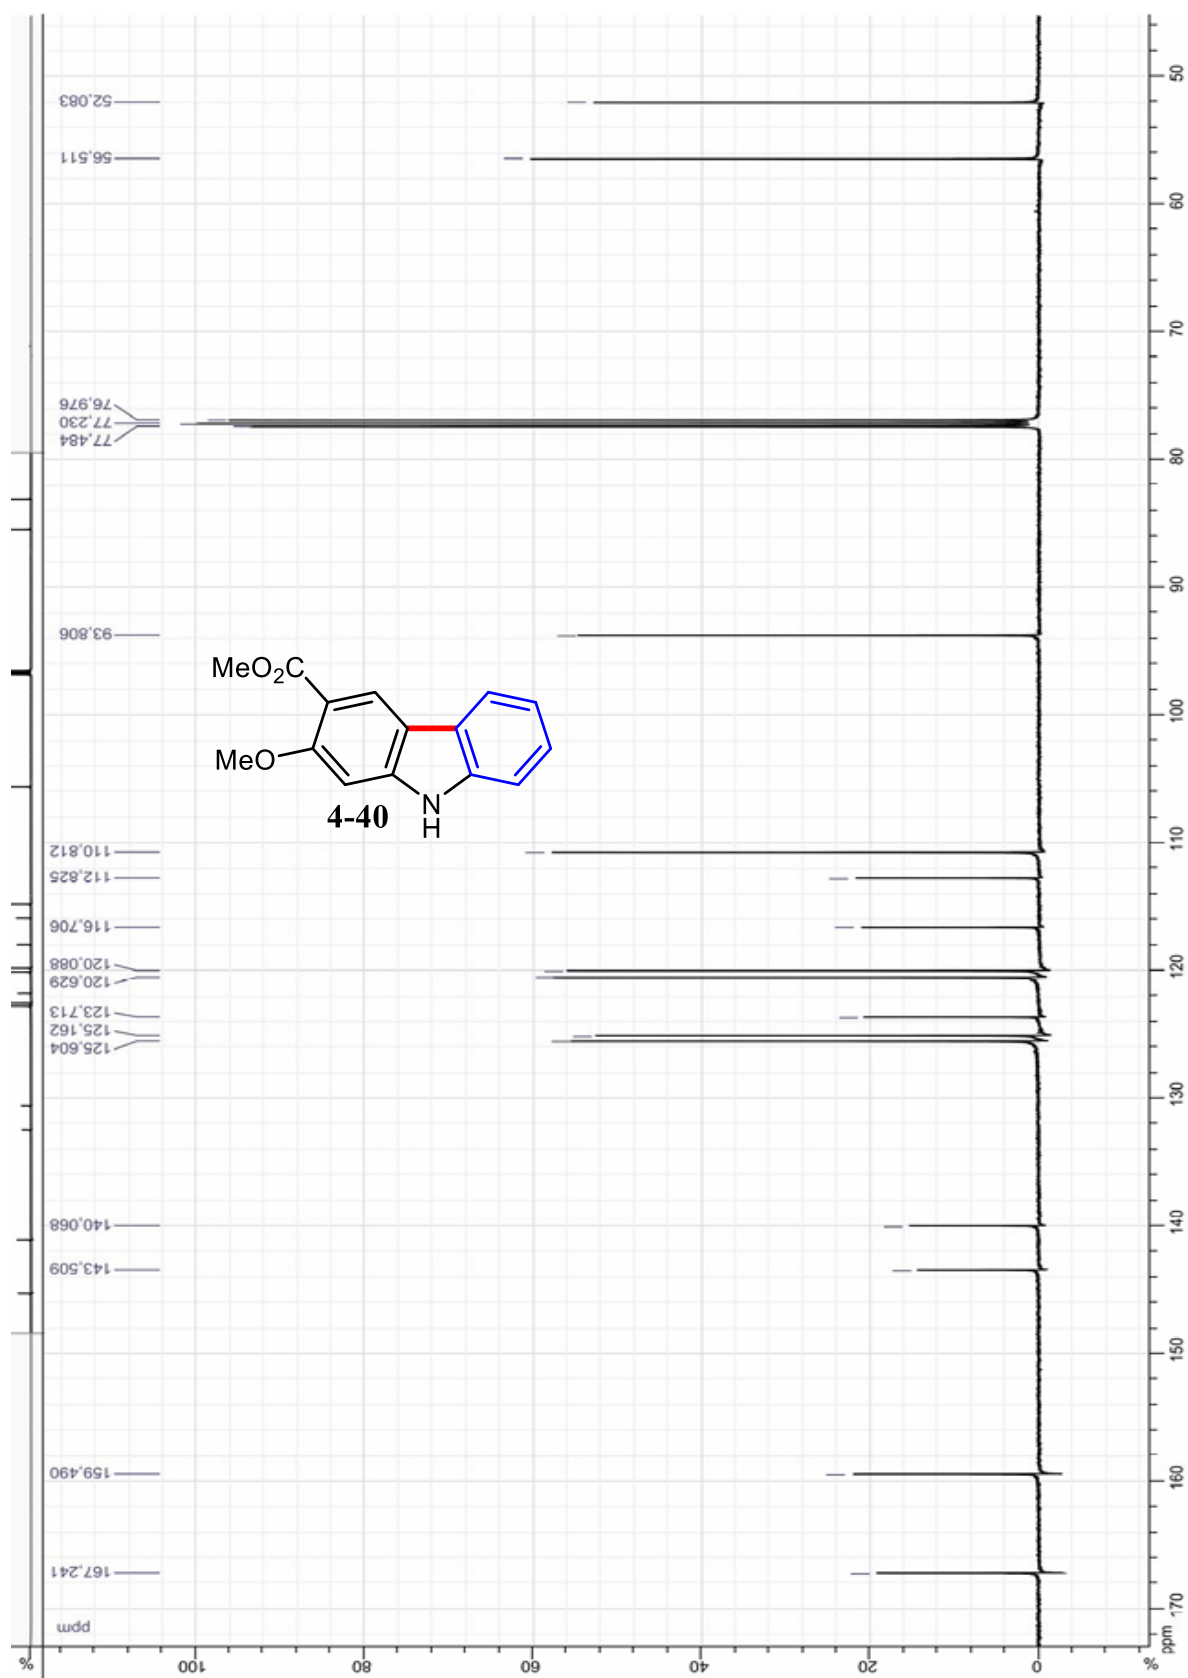

$^1\text{H}$  NMR and  $^{13}\text{C}$  NMR spectra of methyl 2,7-dimethoxy-9*H*-carbazole-3-carboxylate (**4-41**) in  $\text{CDCl}_3$

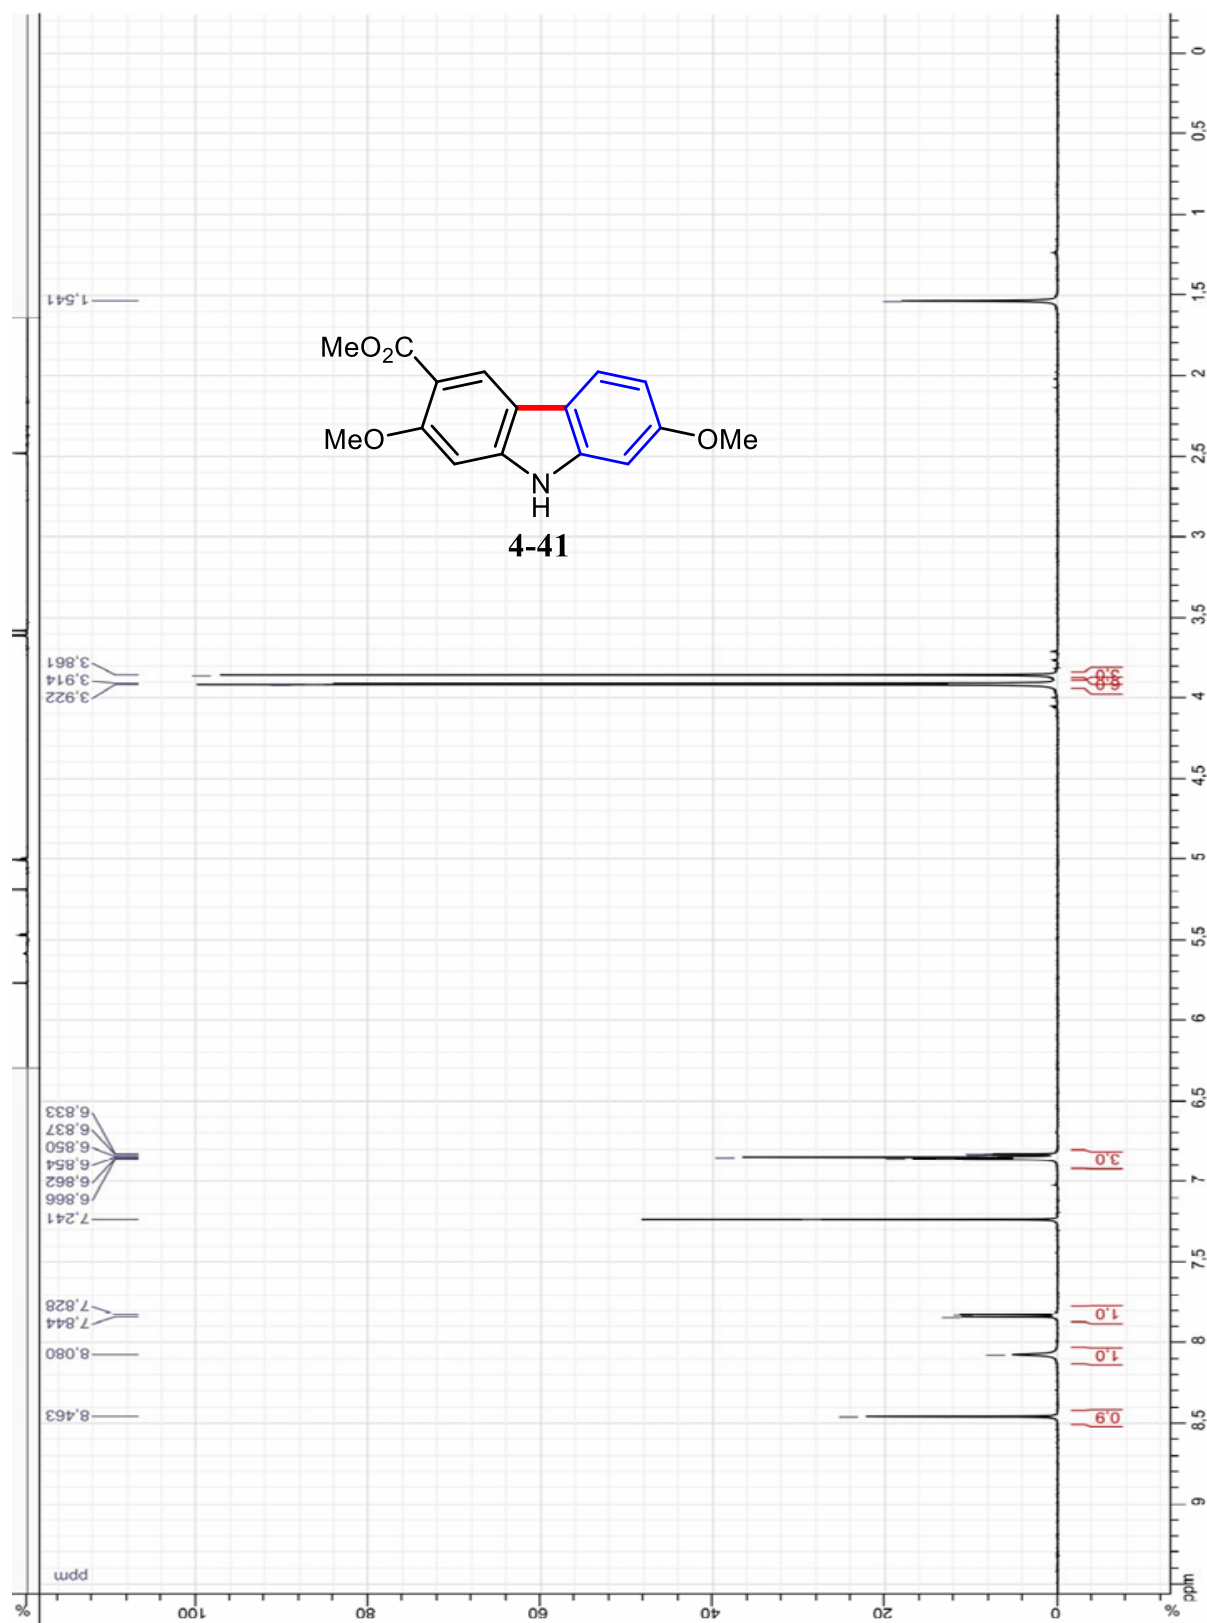

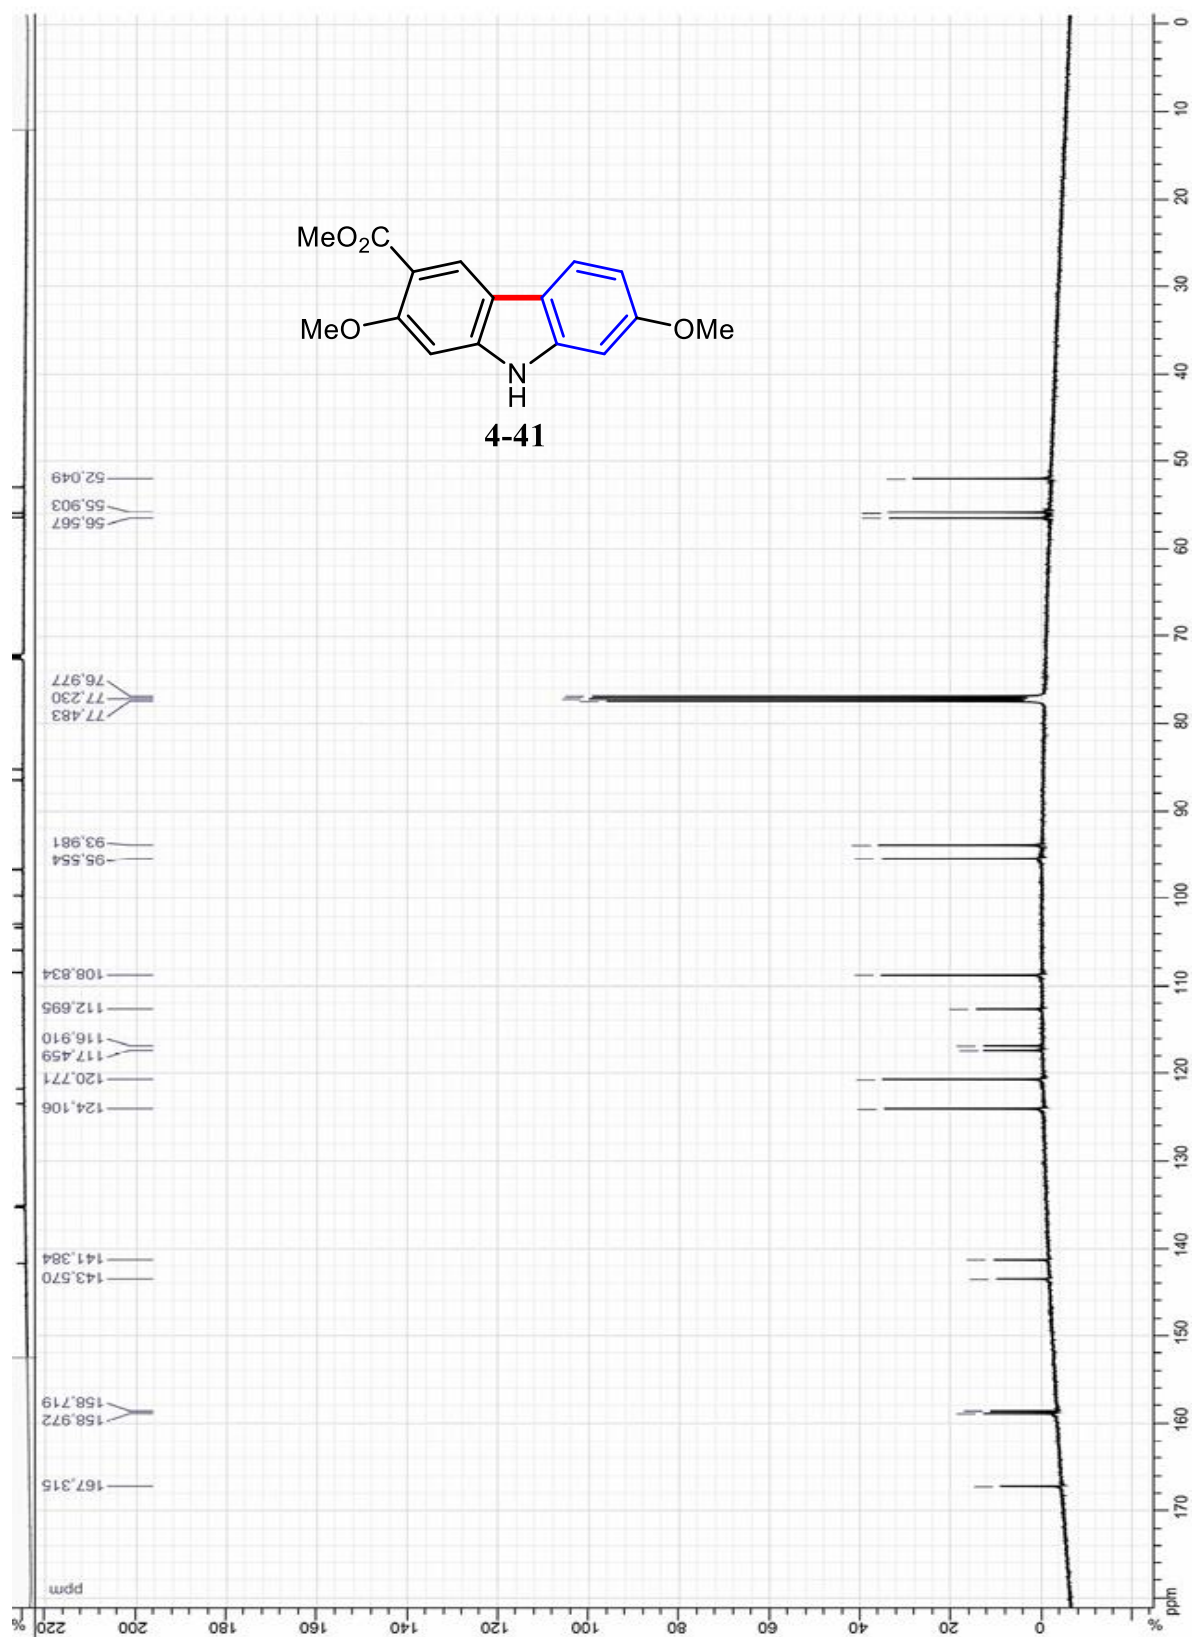



$^1\text{H}$  NMR and  $^{13}\text{C}$  NMR spectra of methyl 2,5-dimethoxy-9*H*-carbazole-3-carboxylate (**4-42**) in  $\text{CDCl}_3$

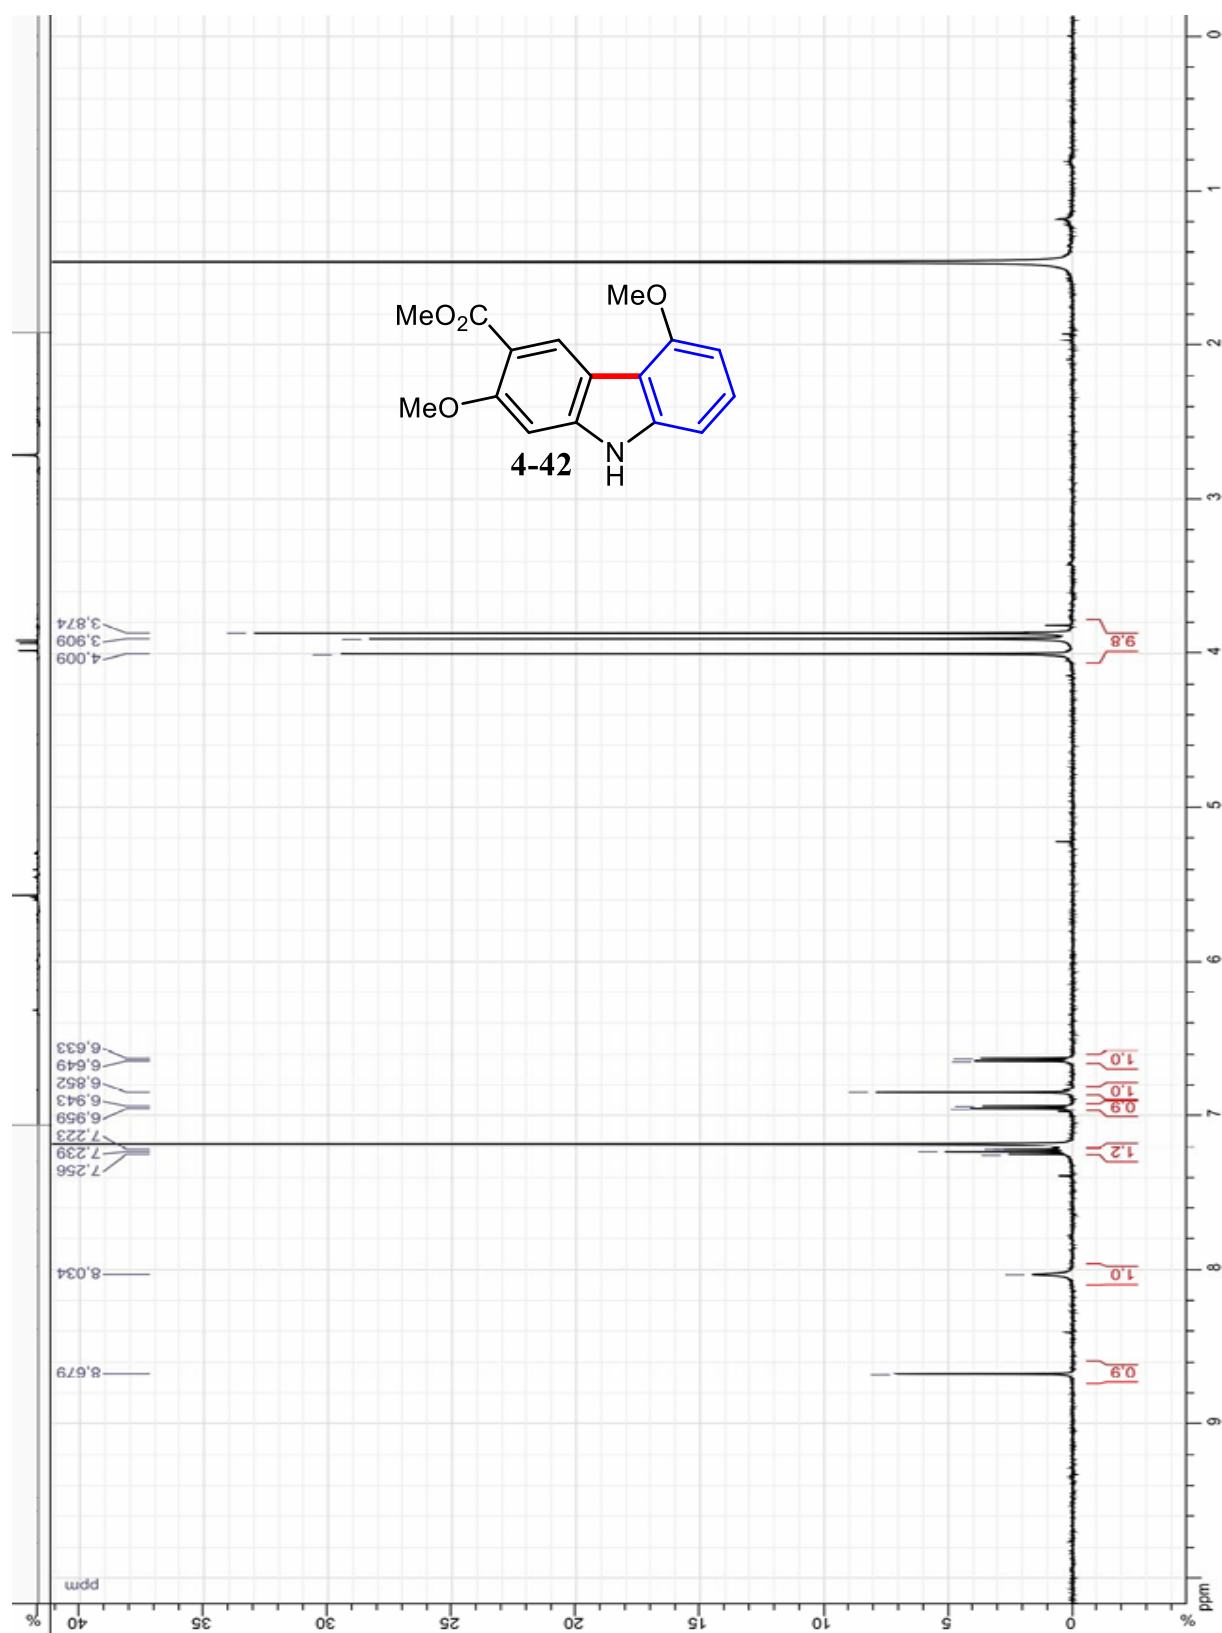

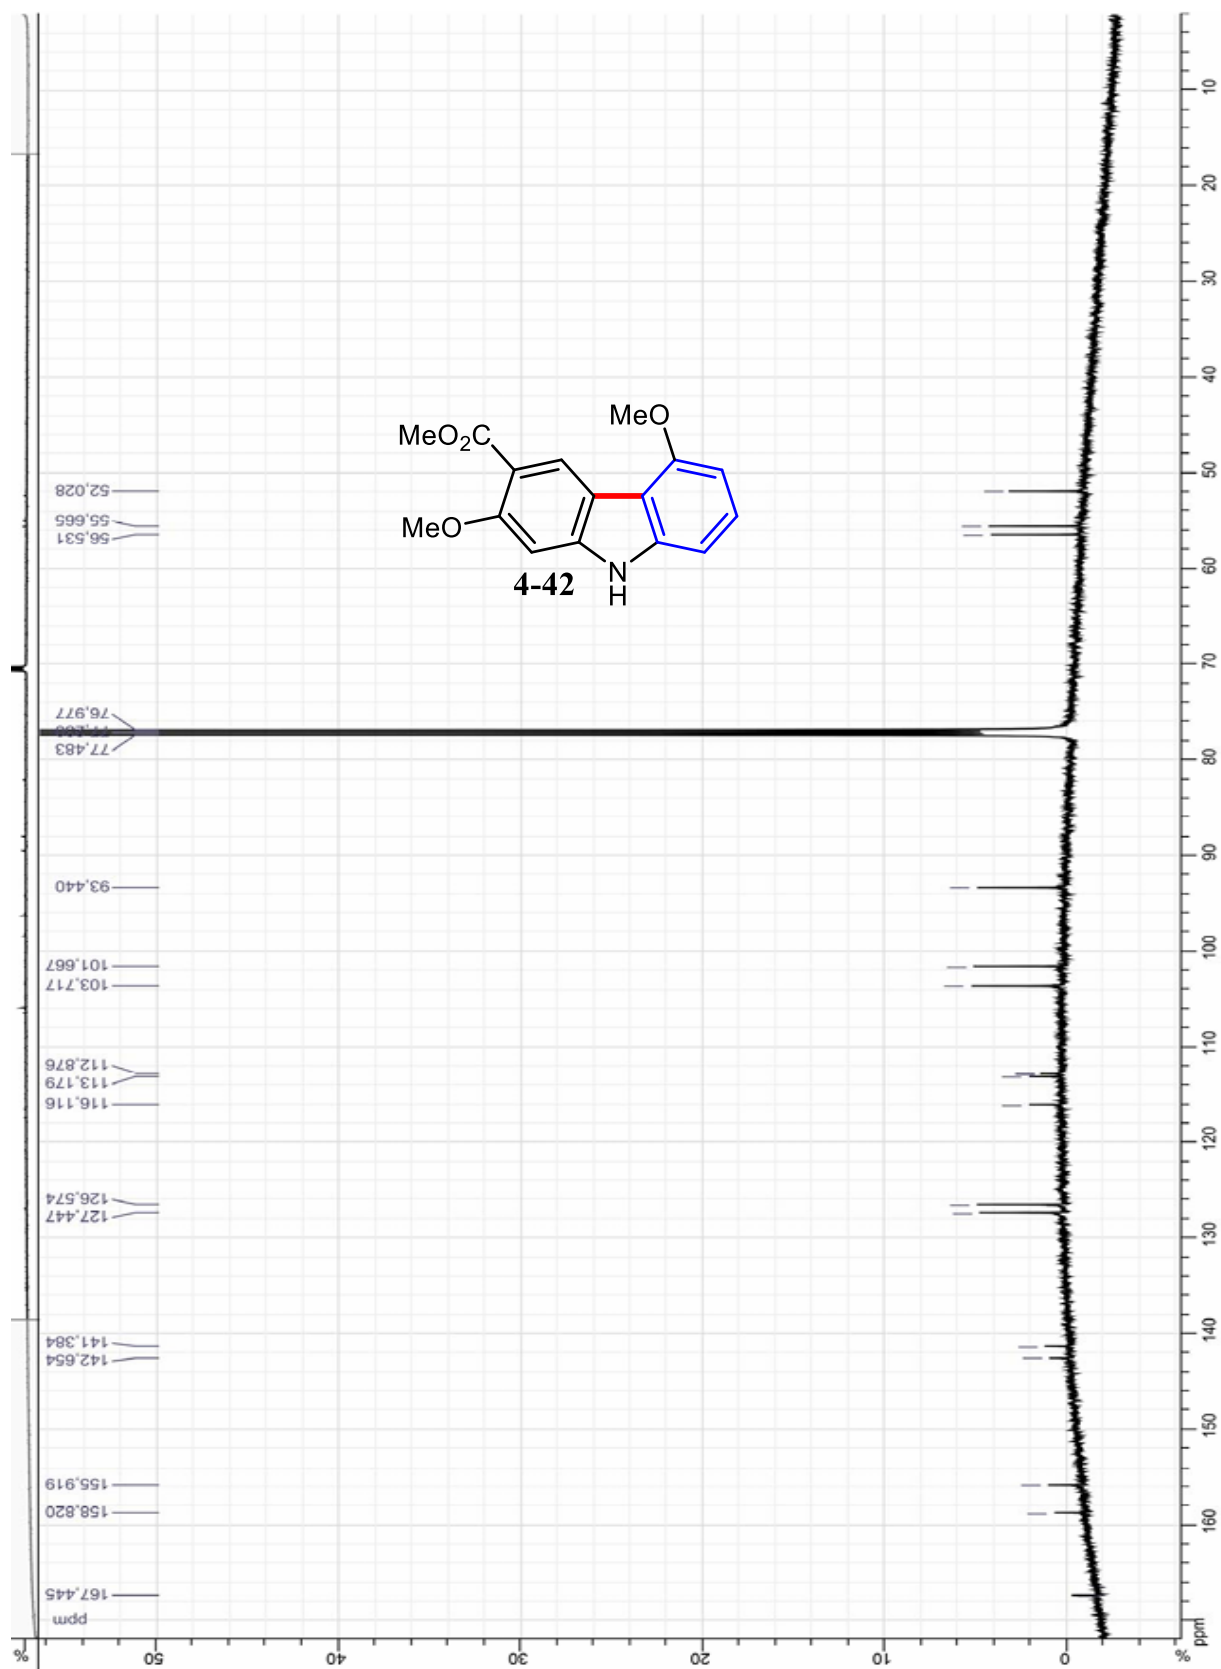

$^1\text{H}$  NMR and  $^{13}\text{C}$  NMR spectra of 9-methyl-9*H*-carbazole (**4-43**) in  $\text{CDCl}_3$

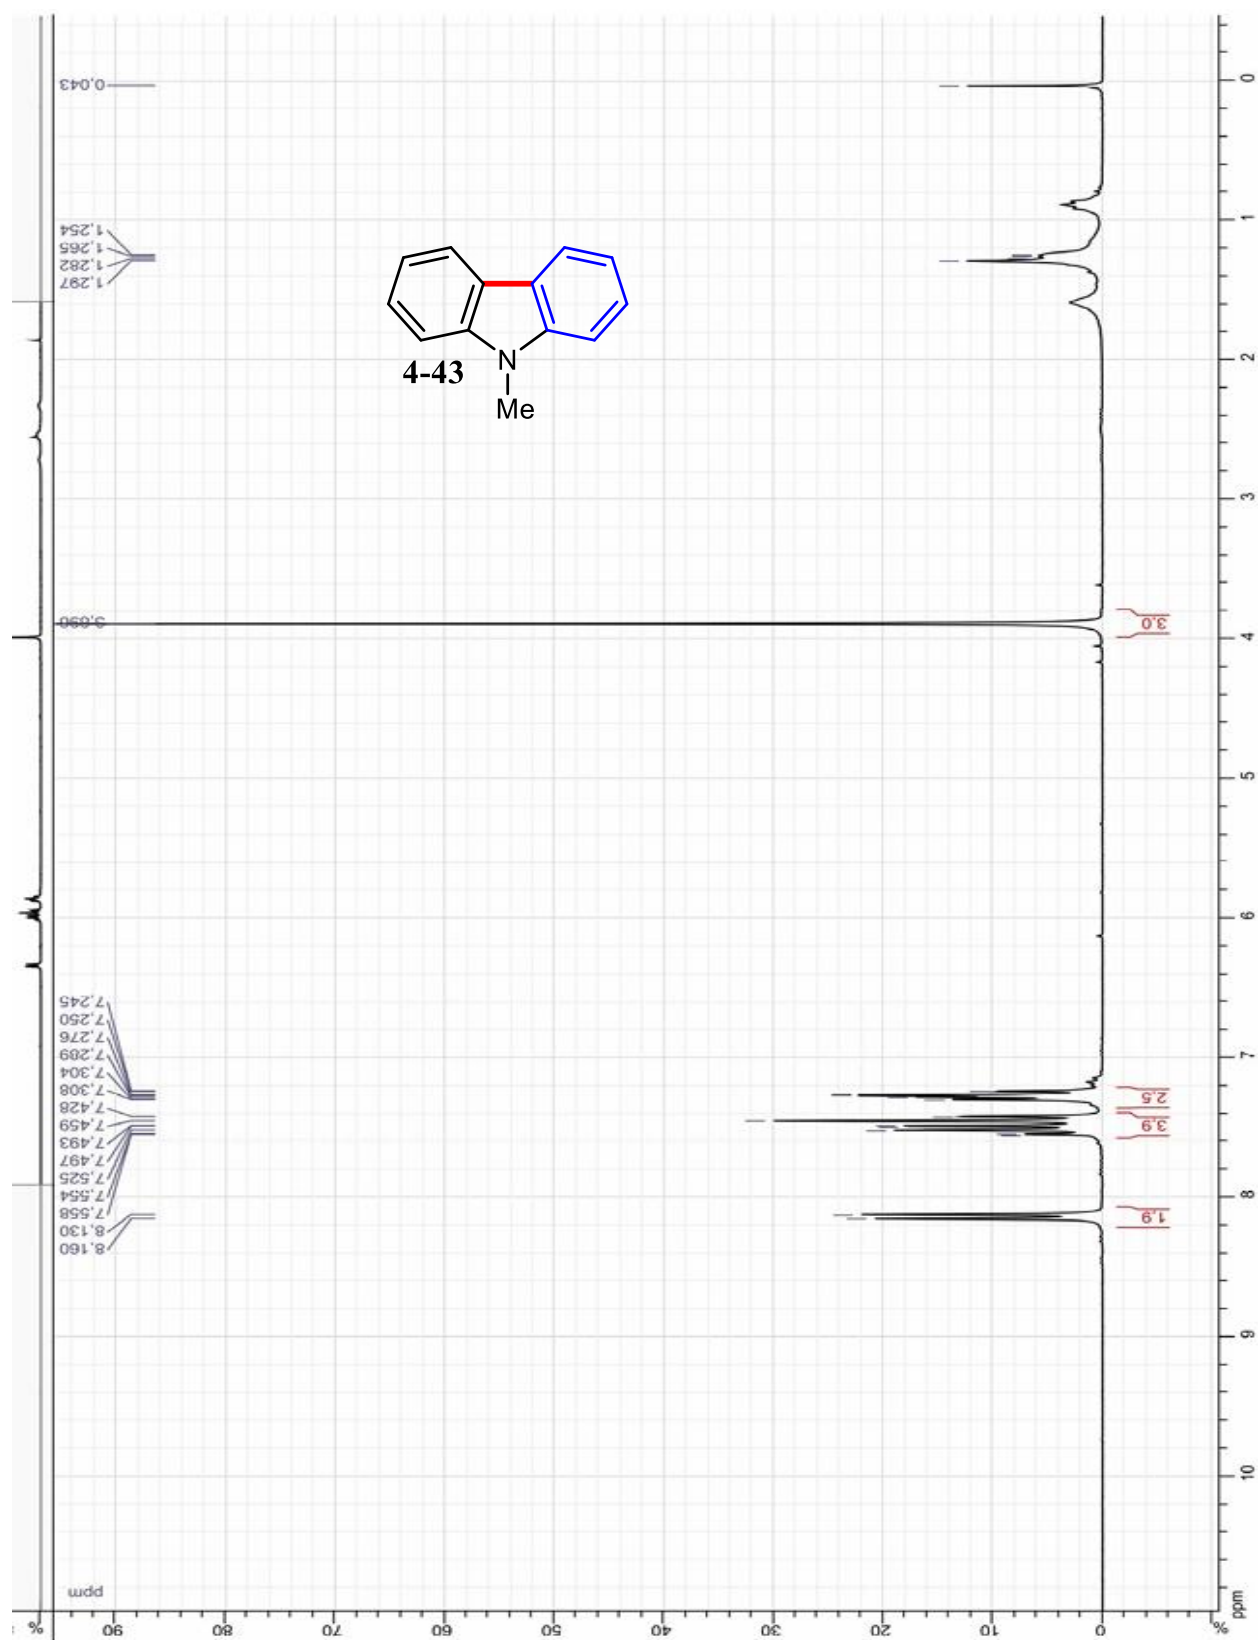

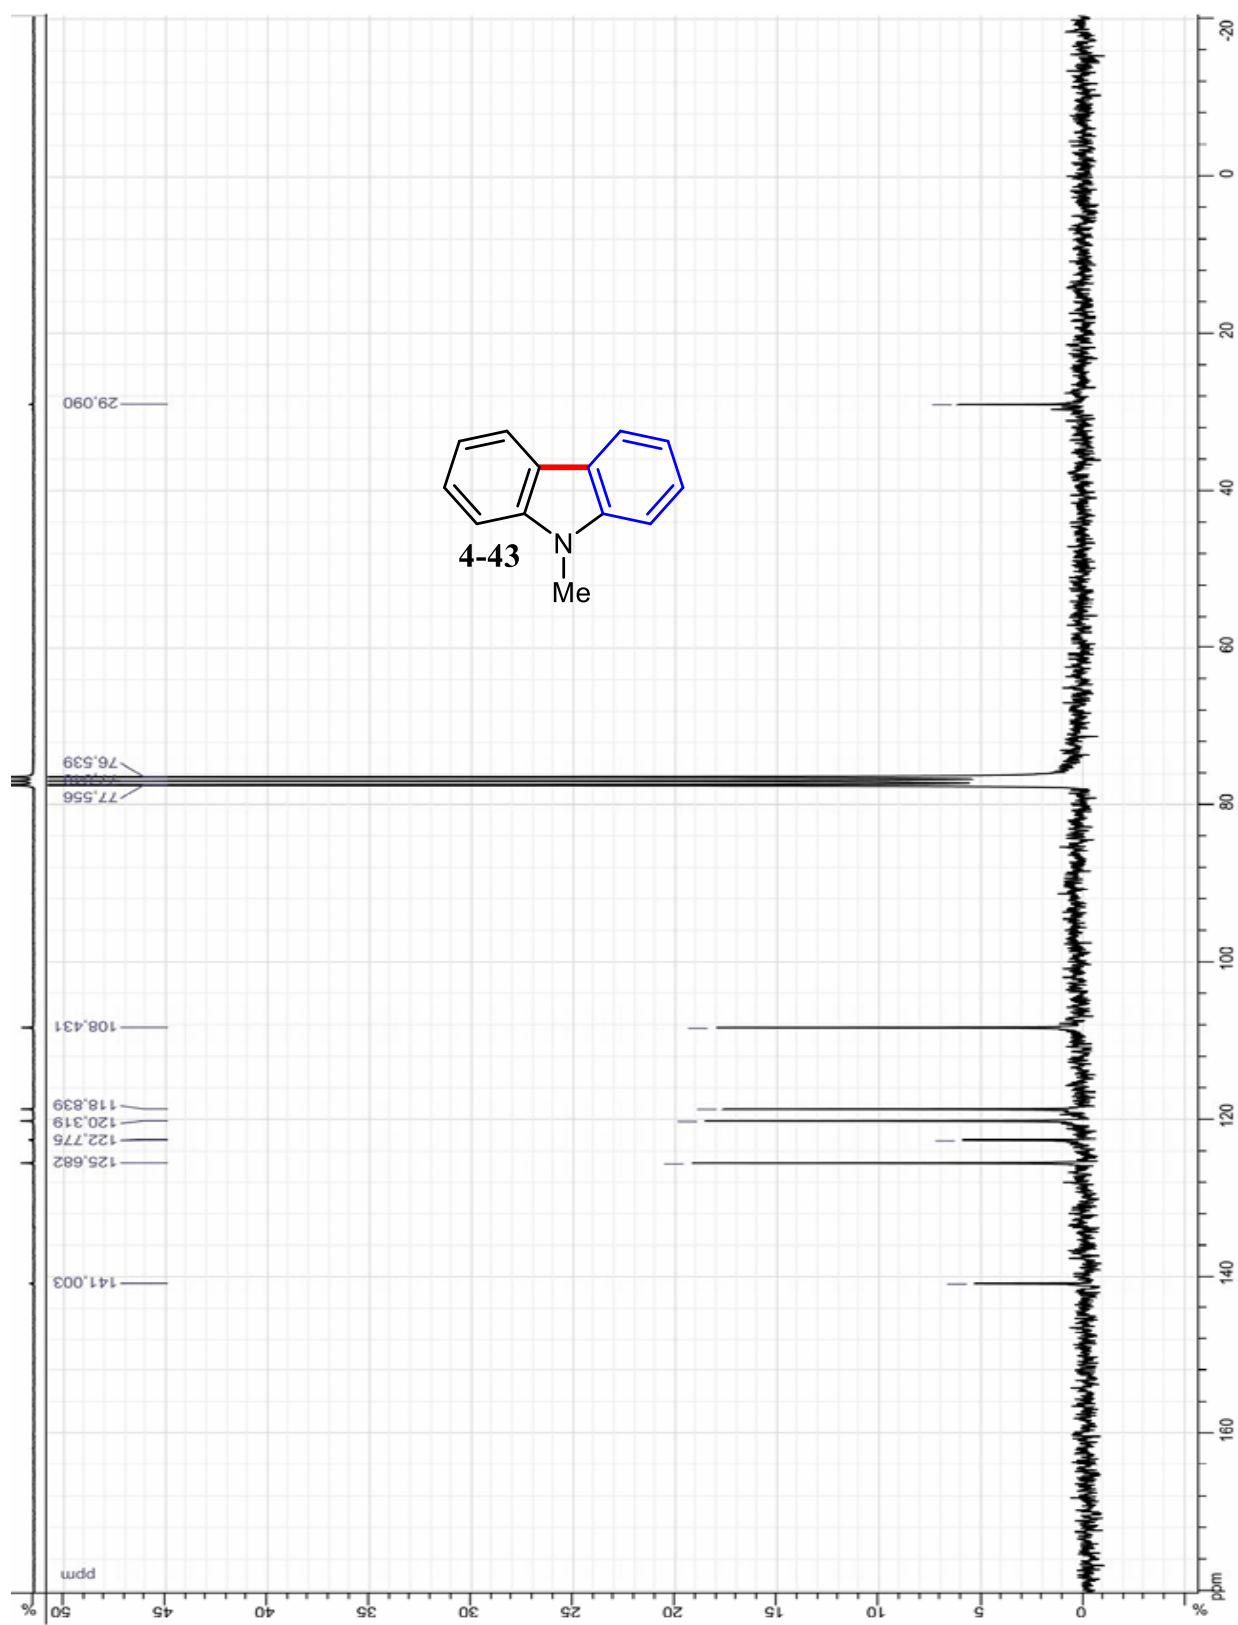

### 9.3 HRMS spectra of carbazoles 4-3, 4-4, 4-18, 4-19, 4-23 and 4-35.

ID-SA242C\_221116175035 #54 RT: 0.60 AV: 1 NL: 4.08E4

FTMS (1,2) - p ESI Full ms [100.00-2000.00]

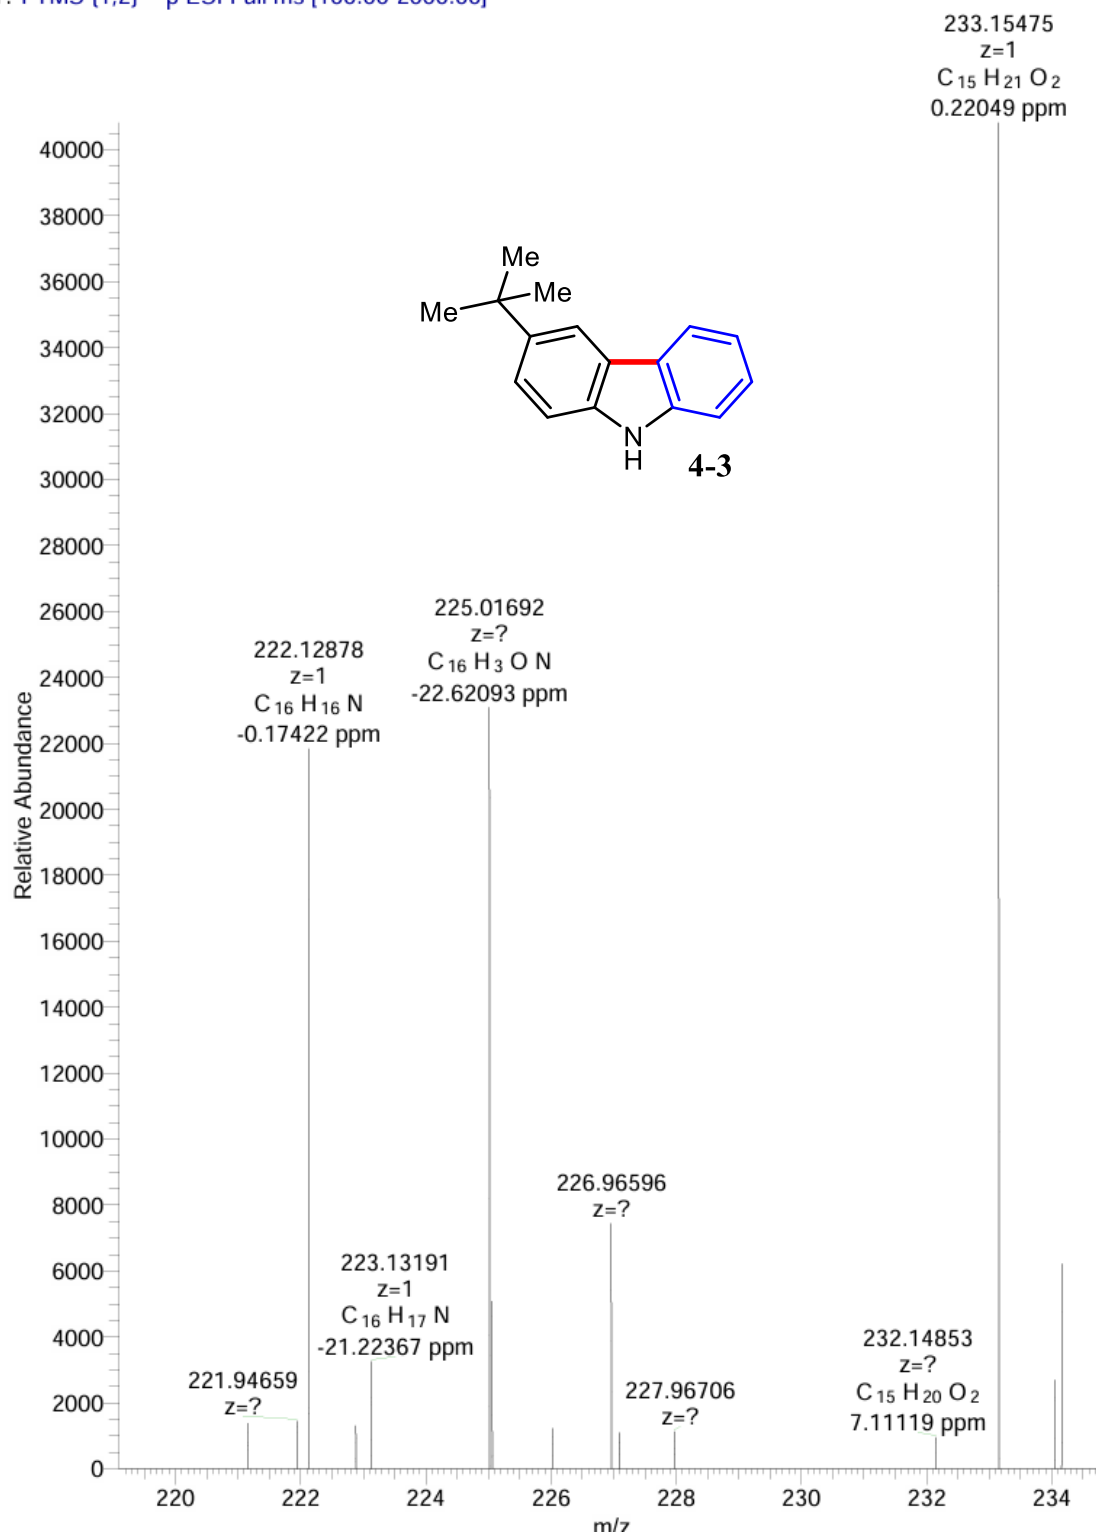

HD-SA244C #36-104 RT: 0.40-1.17 AV: 35 NL: 1.27E6

T: FTMS {1,2} - p ESI Full ms [100.00-2000.00]

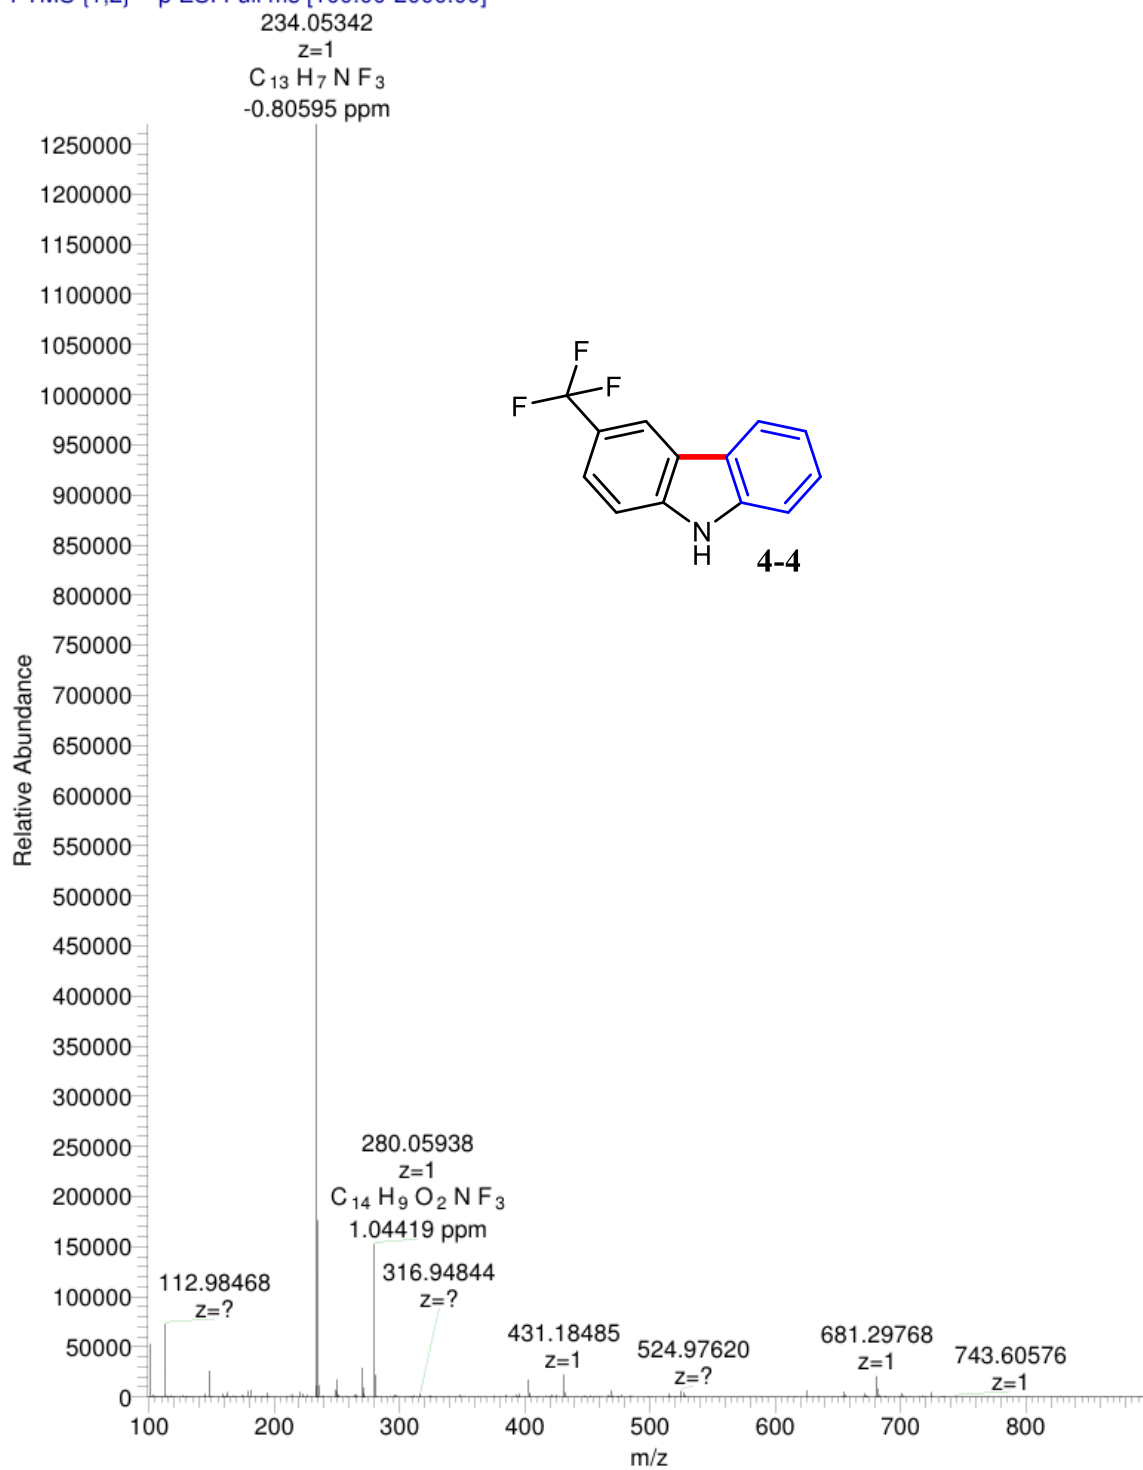

SB-JA-70GU 97 (1.914) AM2 (Ar,22000.0,556.28,0.00,LS 10); ABS

1: TOF MS ES+  
2.96e6

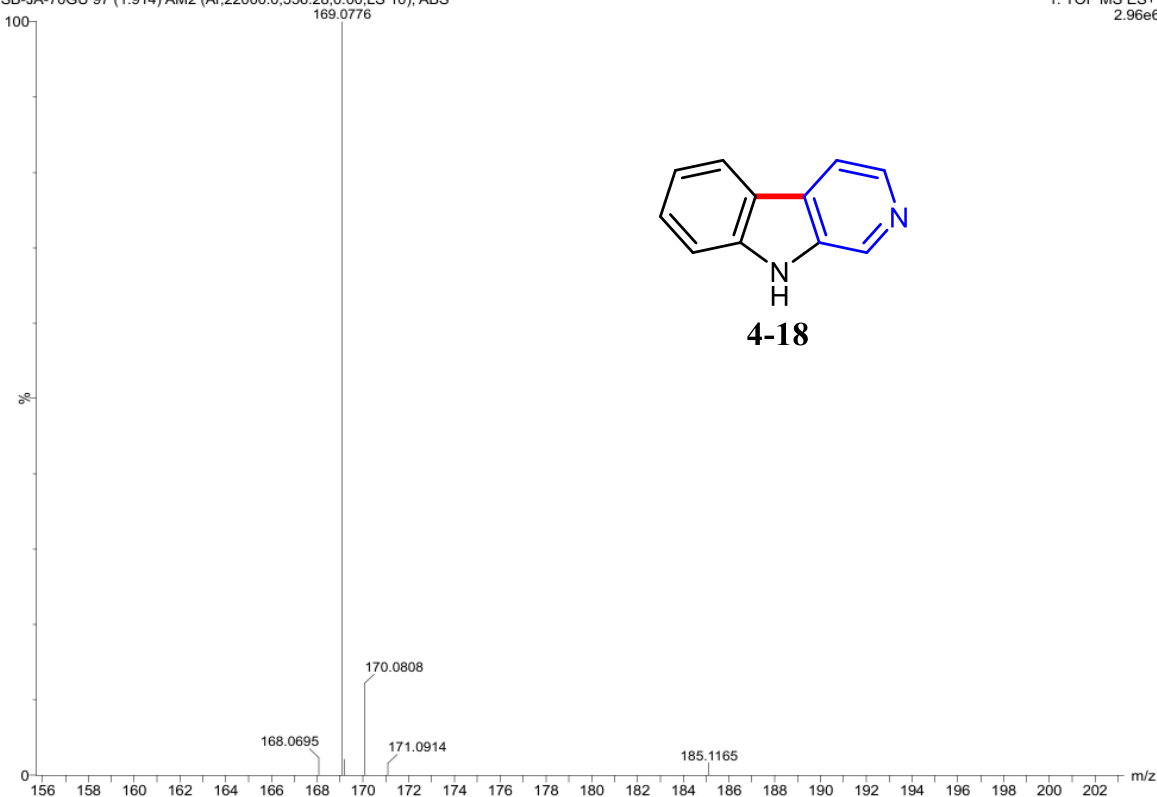

SB-JA-70GL 44 (0.879)

1: TOF MS ES+  
3.24e5

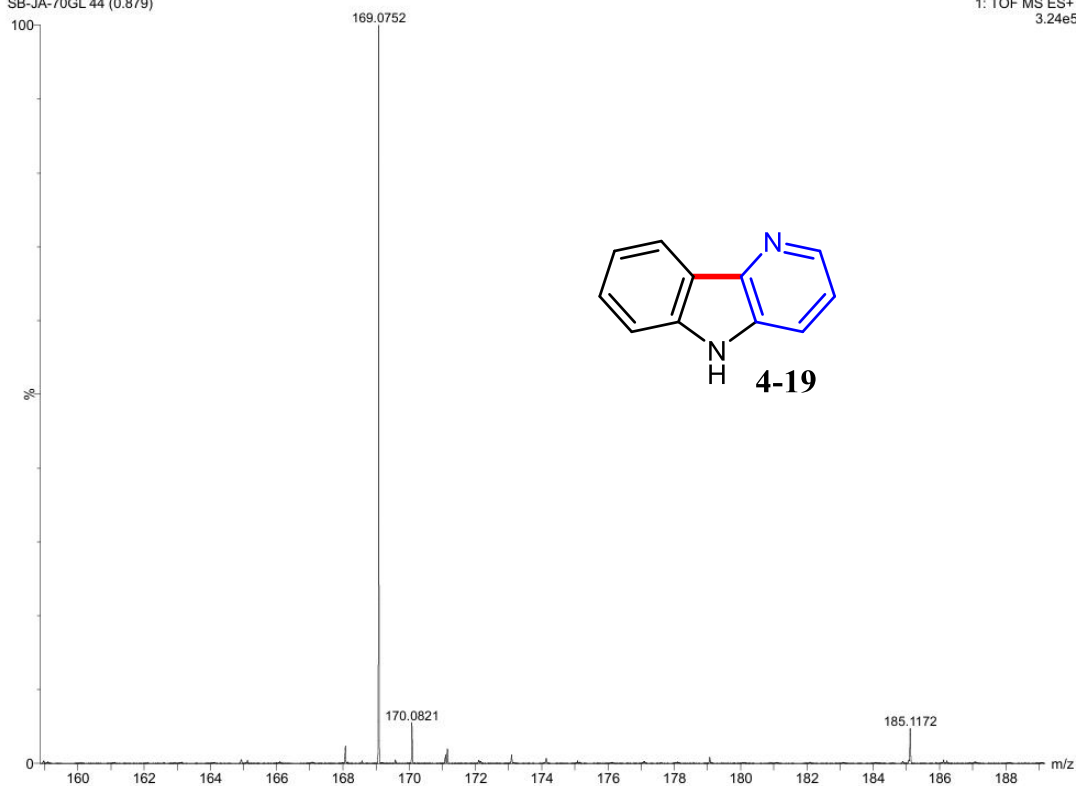

nd-sa7e #65 RT: 0.39 AV: 1 NL: 1.01E9  
T: FTMS + p ESI Full ms [140.0000-2000.0000]

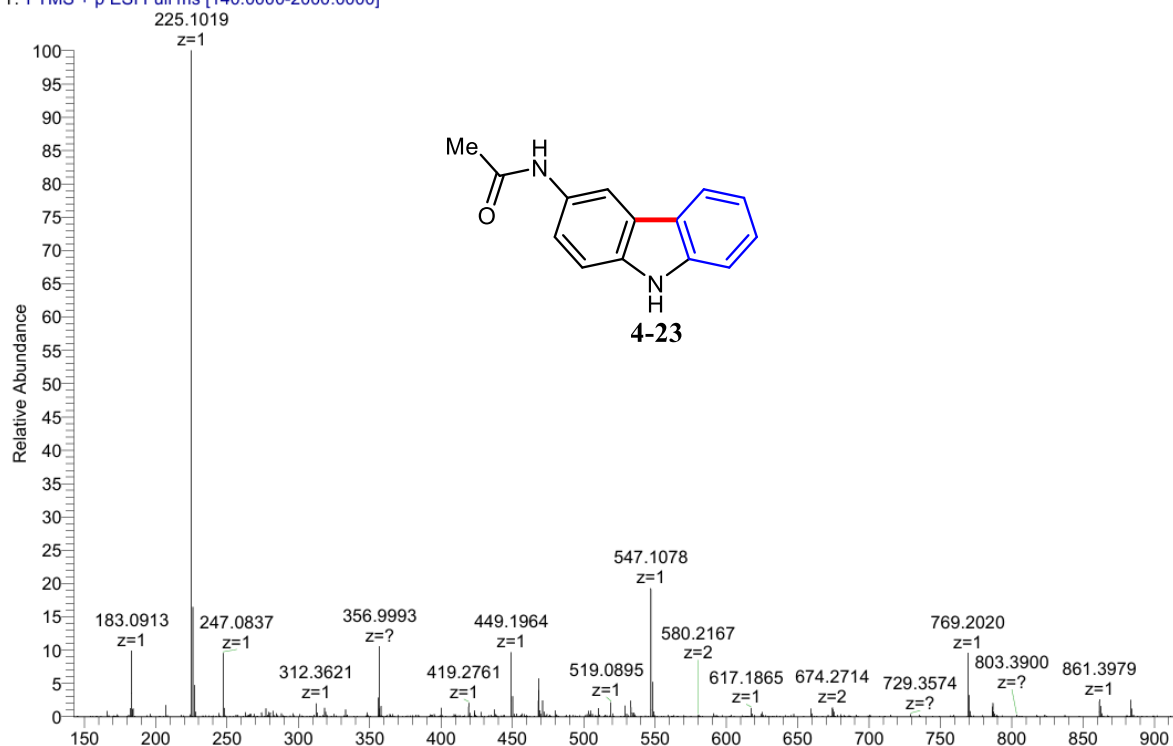

D:\equipes communes\hd-sa158f

11/22/24 15:37:21

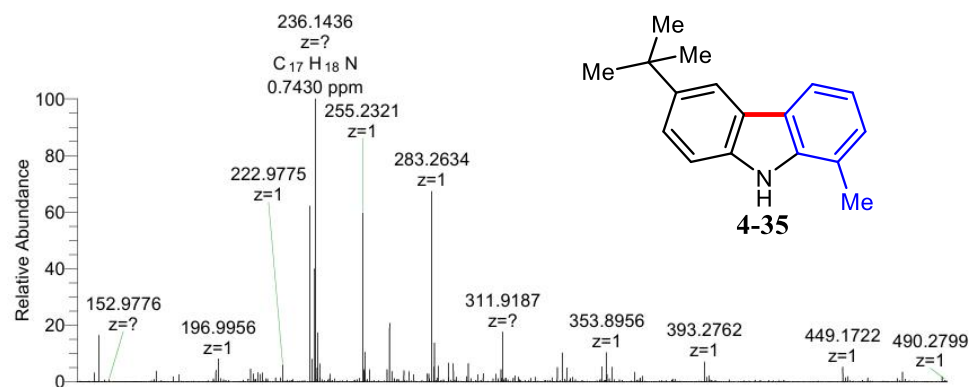

NL: 2.18E7  
hd-sa158f#46-261 RT:  
0.25-1.41 AV: 108 SB: 80  
0.09-0.32 , 0.85-1.48 T: FTMS  
- p ESI Full ms  
[140.0000-2000.0000]

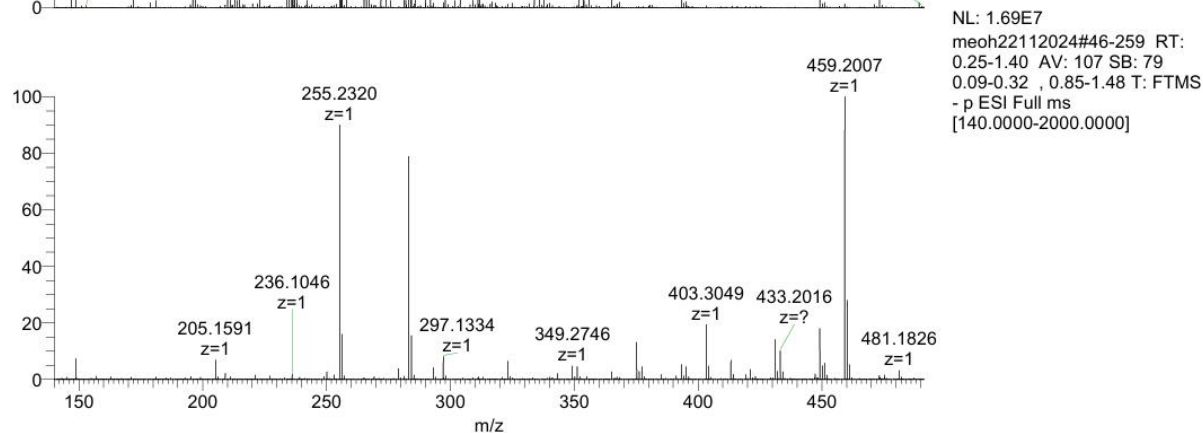

NL: 1.69E7  
meoh22112024#46-259 RT:  
0.25-1.40 AV: 107 SB: 79  
0.09-0.32 , 0.85-1.48 T: FTMS  
- p ESI Full ms  
[140.0000-2000.0000]
